# Supplementary material for: Early transcriptional divergence underlies cell fate bias in bovine embryos
Source: Research Square preprint supplement (doi:10.21203/rs.3.rs-7028131/v1), 2025-07-14
Supplement: Supplementary file 2 [file 0eb0f1336cc535b17b43fb5f.xlsx]

## Sheet: Fig.4b
CDX2_4cell	EmbryoID	Smallest	Largest	CDX2_8cell	EmbryoID	Smallest	Largest
	A	1.32	6.29		A	0	5.17
	B	0	2.85		B	0	1.75
	C	0	2.08		C	0	3.6
	D	0	0		D	1.28	0.56
	E	0	0		E	0	3.29
MAPK14_4cell	EmbryoID	Smallest	Largest	MAPK14_8cell	EmbryoID	Smallest	Largest
	A	43.6	38.62		A	6.7	34.45
	B	5.86	37.85		B	7.16	5.82
	C	18.12	55.88		C	1.24	39.22
	D	18.49	9.83		D	1.86	8.04
	E	9.41	12.53		E	11.02	22.21
RAC1_4cell	EmbryoID	Smallest	Largest	RAC1_8cell	EmbryoID	Smallest	Largest
	A	13.53	261.83		A	9.17	101.78
	B	34.66	381.39		B	19.02	21.55
	C	16.31	157.97		C	10.07	228.9
	D	23.64	31.26		D	15.6	23.54
	E	18.61	18.16		E	13.25	76.22
HRAS_4cell	EmbryoID	Smallest	Largest	HRAS_8cell	EmbryoID	Smallest	Largest
	A	19.02	19.97		A	0	17.18
	B	5.52	17.66		B	2.24	2.49
	C	5.73	21.23		C	1.94	27.11
	D	6.72	1.04		D	7.84	5.09
	E	0	1.37		E	9.06	24.05

## Sheet: Fig.4d
EmbryoID	Smallest (S)/Largest (L)	Dimater (um)	Cavity formation during 192 hpi	Cavity formation at 192 hpi					Cavity formation during 192hpi
E1	S	56	No	No					Yes	No	Total
E1	L	63	Yes	No				Smallest	9	11	20
E2	S	53	Yes	No				Largest	16	4	20
E2	L	63	No	No				Total	25	15	40
E3	S	50	No	No
E3	L	57	Yes	No
E4	S	49	Yes	Yes
E4	L	67	Yes	Yes
E5	S	49	No	No
E5	L	62	Yes	No
E6	S	44	No	No
E6	L	61	No	No
E8	S	59	No	No
E8	L	66	Yes	Yes
E9	S	49	Yes	Yes
E9	L	64	Yes	Yes
E10	S	55	No	No
E10	L	63	Yes	Yes
E11	S	44	No	No
E11	L	68	No	No
E12	S	47	No	No
E12	L	63	No	No
E13	S	53	No	No
E13	L	62	Yes	Yes
E14	S	55	Yes	No
E14	L	63	Yes	Yes
E16	S	56	Yes	No
E16	L	63	Yes	Yes
E18	S	52	Yes	No
E18	L	66	Yes	No
E19	S	55	Yes	No
E19	L	59	Yes	No
E20	S	50	No	No
E20	L	61	Yes	No
E21	S	53	No	No
E21	L	64	Yes	No
E22	S	54	Yes	No
E22	L	65	Yes	Yes
E23	S	51	Yes	No
E23	L	61	Yes	Yes
