# Supplementary material for: Early transcriptional divergence underlies cell fate bias in bovine embryos
Source: Research Square preprint supplement (doi:10.21203/rs.3.rs-7028131/v1), 2025-07-14
Supplement: Supplementary file 5 [file 79731c8c057aa9e90f26130d.xlsx]

## Sheet: Fig.3a_b_c
Genes	Low_1	Low_2	Low_3	High_1	Low_4	Low_5	Low_6	High_2	Low_7	Low_8	Low_9	Low_10	Low_11	Low_12	High_3	High_4	Low_13	Low_14	Low_15	Low_16	Low_17	Low_18	High_5	High_6	Low_19	Low_20	Low_21	Low_22	Low_23	Low_24	High_7	High_8	Low_25	Low_26	Low_27	Low_28	Low_29	High_9	High_10	High_11
20ALPHA-HSD	0	0	0	0	0	0	0	0	0	0	0	0	0	0	0	0	0	0	0	0	0	0	0	0	0	0	0	0	0	0	0	0	0	0	0	0	0	0	0	0
A1BG	0	0	0	0	0	0	0	1	0	0	0	0	0	0	1	2	0	0	0	2	0	0	0	0	0	0	0	0	1	0	0	0	0	1	1	0	0	0	4	1
A1CF	8	1	11	4	6	10	9	10	7	0	5	17	0	11	9	20	3	10	4	14	5	0	12	2	4	1	6	1	7	5	1	20	0	16	12	8	19	8	10	6
A2M	0	0	0	0	0	0	0	0	0	0	0	0	0	0	0	0	0	0	0	0	0	0	0	0	0	0	0	0	0	0	0	0	0	0	0	0	0	0	0	0
A2ML1	0	0	0	0	0	0	0	0	0	0	0	0	0	0	0	0	0	0	0	0	0	0	0	0	0	0	0	0	0	0	0	0	0	0	0	0	0	0	0	0
A3GALT2	0	0	0	0	0	0	0	1	0	0	0	0	0	0	0	0	0	0	0	0	0	0	0	0	0	0	0	0	0	0	0	0	0	0	0	0	0	0	3	0
A4GALT	0	0	0	0	0	0	0	0	0	0	0	0	0	0	0	0	0	0	0	0	0	0	0	0	0	0	0	0	0	0	0	0	0	0	0	0	0	0	0	0
A4GNT	0	0	0	0	0	0	0	0	0	0	0	0	0	0	4	0	0	0	0	0	0	0	10	0	0	0	0	0	0	0	0	0	0	0	0	0	0	0	0	0
AAAS	18	36	25	30	25	46	16	33	66	25	25	56	21	23	54	72	44	57	32	97	55	17	42	41	92	138	95	94	146	105	136	64	25	32	36	29	42	93	34	36
AACS	202	213	176	194	100	204	115	167	55	75	82	210	349	297	318	426	52	43	211	174	503	440	381	230	558	865	520	745	517	689	373	487	334	371	445	501	432	619	543	393
AADAC	0	0	0	0	0	0	0	0	0	0	0	0	0	0	0	0	0	0	0	0	0	0	0	0	0	0	0	0	0	0	0	0	0	0	0	0	0	0	0	0
AADACL3	0	0	2	0	0	0	0	0	0	0	0	0	0	0	0	0	0	0	0	0	0	0	0	0	0	0	0	0	0	0	0	0	0	0	0	0	0	0	0	0
AADACL4	0	0	0	0	0	0	0	0	0	0	0	0	0	0	0	0	0	0	0	0	0	0	0	0	0	0	0	0	0	0	0	0	0	0	0	0	0	0	0	0
AADAT	282	200	160	143	170	167	101	191	228	206	214	377	385	401	345	409	269	297	459	371	466	203	307	258	281	345	180	346	282	400	328	288	303	288	286	534	311	324	362	378
AAED1	18	18	4	13	7	14	11	6	0	0	0	4	15	12	12	12	0	2	2	0	10	8	20	21	12	25	4	0	4	8	15	8	15	14	13	27	8	13	21	2
AAGAB	56	22	21	51	24	38	38	37	56	16	35	71	41	80	91	66	39	49	142	72	112	41	72	60	77	151	31	68	105	37	111	76	65	88	96	98	46	61	193	95
AAK1	60	95	49	80	36	56	42	48	49	26	24	48	71	62	57	65	25	37	104	79	154	143	95	46	114	189	63	110	105	103	76	76	77	60	60	112	92	111	99	80
AAMDC	0	1	0	0	0	0	0	1	0	0	0	0	0	0	0	2	0	0	0	5	4	0	0	0	0	0	0	3	0	0	0	0	0	0	0	0	0	0	0	1
AAMP	55	54	52	67	95	68	42	40	37	51	34	71	62	90	78	124	80	58	75	60	131	70	67	95	113	163	52	189	115	157	128	115	114	79	57	160	40	109	93	145
AANAT	0	0	0	0	0	0	0	0	0	0	0	0	0	0	0	0	0	0	0	0	0	0	0	0	0	0	0	0	0	0	0	0	0	0	0	0	0	0	0	0
AAR2	20	17	27	17	11	8	8	25	7	20	11	19	0	11	35	19	28	25	17	9	14	28	29	25	15	11	20	12	19	14	4	28	20	16	28	23	13	7	57	10
AARD	7	12	18	39	5	8	17	30	9	4	9	14	4	42	39	30	7	11	10	5	32	35	80	33	43	78	33	28	67	51	137	112	26	16	18	34	17	62	103	47
AARS	29	43	10	25	18	29	11	6	22	23	19	31	52	21	17	13	30	34	60	63	25	8	12	26	32	29	38	42	56	56	18	21	18	3	12	39	54	4	23	39
AARS2	0	2	0	0	0	2	2	2	0	1	1	3	1	0	3	17	6	5	0	2	8	0	16	0	6	7	0	0	3	1	2	0	1	2	4	0	0	2	9	0
AARSD1	117	98	99	132	98	176	61	118	113	168	93	261	183	182	246	149	146	169	232	224	290	245	181	151	152	301	146	254	219	255	239	218	128	166	162	161	154	137	310	150
AASDH	257	170	161	183	185	210	105	146	212	226	114	344	283	246	240	260	132	192	318	175	386	140	290	180	492	594	353	429	418	529	412	331	160	236	125	248	189	207	264	233
AASDHPPT	136	96	68	77	41	85	41	73	41	40	45	99	33	57	81	65	39	64	73	72	137	67	115	52	82	177	21	71	133	123	157	102	127	98	111	113	100	122	214	103
AASS	0	0	0	0	0	0	0	0	0	0	0	0	0	0	0	0	0	0	0	0	0	0	0	0	0	0	0	0	0	0	0	0	0	0	0	7	0	0	0	0
AATF	70	68	46	76	68	76	34	30	50	68	29	50	107	58	71	117	51	84	58	81	123	145	94	64	149	185	86	78	89	89	119	59	31	70	79	106	118	37	90	68
AATK	8	9	6	8	4	6	3	0	2	1	4	13	12	18	11	3	8	7	13	13	19	9	13	9	6	14	4	2	11	12	4	1	10	12	3	17	8	3	4	13
ABAT	58	114	56	104	99	107	49	78	33	59	13	48	50	107	36	42	148	181	210	232	246	113	163	104	201	313	117	176	127	176	115	71	52	81	103	109	62	96	122	86
ABCA1	41	44	63	25	36	41	39	41	21	25	30	49	57	60	38	80	80	59	52	128	109	83	54	19	121	28	64	44	89	68	61	81	74	26	65	96	53	91	52	86
ABCA10	0	0	0	0	0	0	0	0	3	0	0	0	0	0	0	0	4	0	0	0	0	0	0	1	0	0	1	0	1	4	1	0	0	0	1	0	0	0	0	0
ABCA12	4	0	0	1	2	3	1	0	0	0	1	7	0	10	1	5	2	0	0	0	0	0	0	0	3	0	5	0	7	7	13	0	0	0	0	0	0	0	0	0
ABCA13	33	3	7	18	9	3	11	12	16	12	6	24	19	4	51	11	8	29	52	48	8	14	12	21	1	16	0	50	19	11	35	12	10	16	3	22	50	8	0	16
ABCA2	1	0	0	0	0	5	2	3	0	0	0	0	0	7	4	0	1	0	0	0	3	8	3	3	0	0	0	0	6	6	0	0	1	2	7	0	1	0	9	5
ABCA3	9	2	2	9	5	18	12	3	0	0	0	7	1	3	12	18	5	7	0	5	12	14	23	14	1	10	8	17	16	3	0	3	21	3	10	30	33	27	65	4
ABCA4	17	6	14	4	0	7	2	0	2	6	11	21	10	8	15	20	5	9	37	16	16	0	8	7	25	8	16	27	7	18	10	3	3	4	14	41	15	19	27	17
ABCA5	22	50	18	49	17	10	31	36	32	24	21	57	19	62	111	84	37	36	41	39	78	39	38	59	54	234	38	110	59	28	70	74	69	26	41	54	52	32	42	100
ABCA6	0	0	0	2	0	1	0	0	0	0	0	0	2	0	0	0	3	7	0	0	0	0	0	1	0	2	0	2	0	0	0	0	0	1	0	5	0	8	0	1
ABCA7	8	0	0	0	0	0	0	0	0	3	0	5	18	5	3	7	1	0	0	0	5	1	3	2	5	3	0	7	11	4	0	0	2	0	0	0	0	0	6	0
ABCA9	0	0	0	0	0	0	0	0	1	0	0	4	0	0	0	0	0	0	0	0	0	0	0	0	0	0	0	2	0	0	0	0	4	0	0	3	0	0	6	0
ABCB1	250	259	261	335	297	305	211	185	293	342	218	514	337	339	465	457	385	402	462	442	558	440	410	263	427	541	237	444	487	433	460	343	290	445	417	724	489	353	484	446
ABCB10	203	184	156	222	149	155	101	114	230	219	162	334	221	263	356	331	129	115	235	265	212	263	204	176	298	517	272	402	424	456	541	434	167	199	297	346	209	262	422	359
ABCB11	59	21	16	15	4	25	8	8	16	24	15	10	11	42	29	55	6	26	22	8	32	15	8	21	13	37	23	43	15	23	31	13	26	26	40	26	39	31	12	69
ABCB4	0	0	0	0	0	0	0	0	0	0	0	0	0	0	0	0	0	0	0	0	0	0	0	0	0	0	5	0	0	0	0	0	0	0	0	0	1	0	0	0
ABCB5	0	0	0	0	0	0	0	0	0	0	0	0	0	0	0	0	0	0	0	0	0	0	0	0	0	0	0	0	0	0	0	0	0	0	0	0	0	0	0	0
ABCB6	0	0	0	0	0	0	0	1	0	0	0	6	2	2	0	0	0	0	1	0	1	0	0	0	0	0	1	0	0	0	2	0	2	0	0	4	0	0	0	0
ABCB7	10	24	7	15	7	24	4	20	38	0	17	10	28	19	18	74	5	3	10	4	8	26	0	8	101	0	48	14	41	26	47	46	0	17	48	5	6	8	46	51
ABCB8	18	15	7	17	4	18	1	3	13	16	8	21	21	10	24	44	11	16	26	10	10	12	22	15	22	24	23	37	19	21	29	5	16	10	16	37	12	13	15	35
ABCB9	1	2	0	11	1	1	7	1	1	6	1	0	1	3	2	1	0	6	5	3	7	17	5	0	4	2	1	1	1	11	2	12	2	2	8	1	1	1	6	8
ABCC1	54	9	34	61	22	24	17	9	19	21	12	38	36	44	27	35	36	55	20	34	3	57	21	12	74	92	31	25	50	24	48	15	30	18	56	31	5	46	33	28
ABCC10	0	4	1	0	0	3	1	1	4	1	5	0	9	1	3	10	3	18	7	0	15	11	6	0	2	0	0	0	5	4	0	0	5	0	0	0	0	0	8	10
ABCC11	16	6	3	8	15	8	9	11	0	6	7	14	0	4	3	5	3	9	8	9	3	0	2	8	9	1	4	0	7	0	9	6	7	11	18	9	25	9	3	16
ABCC12	0	0	0	0	0	0	0	0	0	0	0	0	0	1	0	0	0	0	0	0	0	0	0	0	0	0	0	0	0	0	0	0	0	0	0	0	0	1	0	2
ABCC2	177	184	84	147	144	185	98	110	102	103	41	217	120	162	116	152	183	253	278	275	184	177	178	225	110	206	77	104	116	151	193	203	211	184	231	378	246	202	311	213
ABCC3	0	0	0	0	1	0	0	0	5	0	0	1	0	1	12	0	0	4	4	15	1	0	1	0	18	0	0	9	6	4	0	2	15	0	5	7	1	0	0	10
ABCC5	8	16	13	1	6	2	1	15	0	9	1	2	18	11	10	0	2	10	15	22	11	36	19	6	30	7	8	0	2	0	4	4	8	22	14	0	13	19	0	2
ABCC6	0	0	0	0	0	0	0	0	0	0	0	0	0	0	0	0	0	0	0	0	0	0	0	0	0	0	0	0	0	0	0	0	0	0	0	0	0	0	0	0
ABCC8	0	0	1	0	4	2	0	0	4	5	2	3	1	0	0	0	0	2	2	2	0	0	3	4	0	9	1	0	5	0	4	1	1	9	2	0	8	0	0	0
ABCC9	0	0	0	0	0	0	0	0	0	0	0	0	0	0	0	0	0	0	0	0	3	0	0	0	0	0	0	0	0	0	0	1	0	0	1	0	0	0	0	0
ABCD1	0	3	0	0	1	0	0	0	0	0	0	0	0	0	0	1	0	9	0	0	0	0	1	0	1	0	1	0	1	0	0	0	0	0	4	0	0	0	0	0
ABCD2	1	5	2	0	4	1	2	0	1	3	3	8	8	7	5	6	11	9	1	11	19	3	11	4	0	6	0	0	13	0	8	2	9	2	7	0	9	0	33	6
ABCD3	82	125	103	190	110	179	45	127	96	140	68	153	176	193	151	262	134	200	295	115	281	230	236	156	425	442	281	329	392	359	453	356	267	164	236	295	222	294	311	153
ABCD4	7	18	2	9	2	13	7	4	0	11	4	18	47	15	21	50	3	7	20	18	0	15	0	2	24	32	27	13	33	1	10	5	6	20	7	49	0	0	8	15
ABCE1	144	215	110	124	116	198	53	99	140	178	90	213	230	145	240	256	146	136	147	183	318	161	161	127	389	555	247	413	379	361	383	222	161	271	295	327	232	208	349	286
ABCF1	155	172	109	155	116	189	71	101	156	188	175	337	239	274	307	263	229	192	270	211	384	298	191	184	268	475	168	281	332	315	275	221	220	236	193	294	248	258	410	224
ABCF2	774	808	558	677	565	702	369	575	471	566	319	795	619	651	805	855	812	920	1074	996	1233	886	973	760	788	1356	607	1039	914	1022	953	714	851	722	879	1183	819	984	1306	1233
ABCF3	135	131	110	171	143	153	72	117	183	161	81	292	135	187	250	229	174	294	208	188	269	219	218	225	266	404	140	268	294	207	371	225	110	133	85	202	112	151	248	167
ABCG1	0	0	0	0	0	0	0	0	0	0	0	0	0	0	0	0	0	0	0	0	0	0	0	0	0	0	0	0	0	0	0	0	0	0	0	1	0	0	0	1
ABCG2	38	18	27	34	45	40	36	27	94	64	46	79	41	66	79	96	55	18	58	28	141	27	53	99	53	138	67	88	70	98	154	127	87	52	87	113	110	123	125	109
ABCG4	4	0	3	5	4	9	7	0	4	4	0	0	15	0	1	0	2	4	5	4	1	0	0	13	4	0	0	0	3	8	9	8	2	0	11	1	3	4	0	10
ABCG5	108	52	47	66	46	57	23	44	46	85	39	107	70	101	120	80	93	144	136	109	133	134	132	90	54	94	63	97	82	156	104	45	75	115	92	107	104	101	96	120
ABCG8	113	79	50	72	59	41	52	41	49	86	70	124	75	163	134	117	158	132	168	200	160	164	178	118	119	241	62	201	159	187	112	115	167	115	134	126	117	153	168	158
ABHD1	0	0	0	0	1	0	0	0	0	0	0	0	0	0	0	0	0	0	0	0	0	0	0	0	0	0	0	0	0	0	3	0	0	0	0	0	0	0	3	0
ABHD10	504	375	338	394	339	369	250	267	351	462	215	516	415	427	403	707	413	464	583	472	607	441	488	471	778	1078	542	913	837	959	1039	657	370	566	522	542	515	536	724	657
ABHD11	112	75	49	77	61	91	48	50	76	65	36	89	90	98	115	87	69	101	116	109	146	82	103	87	106	145	76	92	103	87	157	104	109	104	99	158	101	106	252	127
ABHD12	5	11	26	49	11	3	20	45	0	9	7	3	17	24	80	97	4	3	6	8	4	6	42	63	9	9	6	33	40	133	99	107	4	21	29	41	4	32	57	69
ABHD12B	0	0	0	0	0	3	0	0	0	0	0	3	0	3	3	0	0	0	0	0	4	0	0	3	0	0	0	5	0	0	0	0	0	1	0	0	0	19	0	0
ABHD13	0	0	0	4	0	0	0	2	0	0	0	0	0	0	0	0	0	0	0	0	0	9	5	0	0	0	0	0	1	0	4	0	0	0	0	0	0	0	24	5
ABHD14A	2	0	0	0	0	0	0	0	0	0	0	3	2	0	0	7	2	0	1	0	2	0	0	0	0	10	0	0	0	0	0	0	3	0	0	3	0	0	8	7
ABHD14B	11	0	0	0	0	6	5	0	0	0	4	0	0	4	7	0	1	0	9	4	0	8	10	9	0	0	0	7	0	0	0	0	2	10	0	0	0	0	0	6
ABHD15	0	0	0	0	0	0	0	0	0	0	0	0	0	0	0	2	0	0	0	0	0	0	0	0	0	2	0	0	0	0	0	0	0	0	0	1	0	0	0	0
ABHD16A	35	29	47	52	33	44	10	56	51	20	19	80	60	41	77	46	33	50	49	42	43	76	16	51	119	178	89	117	95	121	177	105	66	66	81	88	91	121	56	67
ABHD16B	0	0	0	0	0	0	0	0	0	0	0	0	0	0	1	1	0	0	0	0	0	0	1	2	0	0	0	0	2	0	0	2	1	0	0	1	0	2	5	0
ABHD17A	6	3	18	38	1	5	17	21	1	0	0	5	3	6	50	52	0	1	3	5	12	4	47	54	3	3	3	6	11	32	64	38	3	15	11	16	27	26	78	75
ABHD17B	52	57	63	121	13	18	93	79	20	16	12	12	13	142	200	270	9	8	56	22	22	60	113	122	28	139	54	206	208	254	203	208	71	86	56	73	87	113	116	148
ABHD17C	39	22	33	31	2	18	5	89	18	5	6	8	17	6	49	74	19	9	57	24	8	9	12	63	18	56	17	4	11	25	23	99	22	37	53	39	12	48	79	81
ABHD18	555	502	346	526	575	670	334	424	386	344	367	690	608	476	692	629	642	603	860	893	841	786	755	605	968	1574	870	1012	978	1228	1305	812	700	725	553	1296	920	903	906	809
ABHD2	11	5	7	0	3	10	6	3	5	15	0	5	0	6	11	8	1	6	12	1	9	19	1	8	2	9	0	8	3	5	27	4	2	11	0	0	3	4	11	5
ABHD3	122	94	79	128	92	89	73	100	133	95	106	213	181	204	308	248	96	52	79	93	113	130	124	90	210	408	197	268	268	355	307	312	209	166	236	185	147	237	121	259
ABHD4	280	250	194	190	191	247	126	208	144	174	113	242	211	214	280	284	176	281	254	327	335	277	297	171	461	828	363	598	546	601	425	389	389	255	323	521	434	319	467	438
ABHD5	37	32	20	27	19	36	4	8	16	8	10	38	21	3	5	18	7	28	40	30	32	19	22	13	12	40	1	35	14	36	24	42	31	90	71	61	81	32	80	25
ABHD6	56	34	49	59	53	57	28	40	74	37	37	68	71	99	71	49	58	49	52	58	77	23	44	47	47	55	28	47	59	103	50	38	50	86	85	147	35	46	138	108
ABHD8	15	13	11	18	11	14	7	15	2	6	3	6	3	4	3	8	9	9	20	6	23	17	31	13	5	10	12	9	19	24	8	1	21	14	20	13	27	9	38	14
ABI1	1624	1682	1258	1384	1191	1779	1003	1064	1276	1424	807	1674	1905	1707	1759	2175	1974	2186	2743	2159	2599	2461	2105	1639	2172	3304	1587	2410	2294	2523	2277	1614	1855	1549	2110	3217	2362	2799	2315	2156
ABI2	185	181	198	249	66	157	142	115	70	66	49	70	147	232	209	278	88	41	110	103	205	230	244	153	236	422	216	314	350	460	374	220	233	250	385	353	321	356	316	394
ABI3	0	0	0	1	0	0	2	0	0	0	0	2	0	0	4	0	1	0	0	0	2	0	0	0	0	0	0	0	0	0	0	0	1	0	0	0	0	1	0	0
ABI3BP	297	399	242	289	258	317	182	282	227	252	146	248	243	313	254	333	215	304	384	331	361	410	415	266	477	344	214	425	366	485	349	355	252	195	299	301	247	363	349	318
ABL1	89	40	42	79	43	61	30	91	56	65	37	59	47	39	97	60	56	82	74	64	88	71	47	75	38	88	53	118	74	70	99	60	72	77	83	96	55	61	293	131
ABL2	18	17	8	29	29	11	22	21	8	0	14	19	20	24	34	10	12	46	38	33	36	24	45	41	28	54	19	13	32	12	42	40	44	16	28	31	37	27	64	48
ABLIM1	388	360	298	433	296	396	181	266	273	292	124	381	539	386	343	342	468	568	556	518	695	585	466	288	567	884	410	717	547	556	484	368	458	443	500	667	491	526	627	473
ABLIM2	0	0	0	0	0	0	0	0	0	0	0	0	4	0	0	0	0	0	0	0	1	1	1	0	0	0	0	0	0	0	0	0	0	0	0	0	0	0	2	0
ABLIM3	87	91	36	66	83	23	38	69	29	82	37	85	63	58	96	132	75	93	101	132	88	81	116	94	208	158	100	219	154	198	216	170	149	166	160	218	171	171	253	256
ABO	0	0	0	0	0	0	0	5	0	0	0	0	0	0	0	0	0	0	0	0	0	0	0	0	0	3	0	0	0	0	0	0	0	0	0	0	0	0	0	0
ABR	88	98	66	63	84	77	52	58	51	64	57	60	95	137	139	108	51	123	157	105	236	155	144	81	126	126	49	118	106	108	129	147	99	129	142	109	91	141	264	189
ABRA	9	0	2	0	1	5	0	1	0	0	0	7	0	0	0	0	4	1	0	0	25	0	0	1	0	0	1	0	2	0	7	0	6	1	2	7	0	0	4	0
ABRACL	80	38	38	79	76	64	26	32	38	47	21	59	57	49	54	75	82	68	61	77	83	81	70	64	22	66	17	29	75	82	98	61	85	59	83	101	69	98	160	152
ABRAXAS1	305	287	206	228	206	282	143	165	295	308	161	383	352	389	563	394	234	256	371	338	405	344	358	330	388	609	349	418	417	571	745	407	324	431	304	435	216	186	572	346
ABRAXAS2	467	392	375	490	437	546	206	403	376	415	246	595	447	451	446	452	623	670	801	704	714	672	590	482	576	766	430	699	694	600	723	577	716	547	933	1037	812	732	1252	997
ABT1	219	217	131	165	145	203	113	164	151	213	98	210	318	323	356	251	230	286	349	297	364	398	351	272	165	329	123	181	255	218	292	193	194	324	196	311	251	214	413	273
ABTB1	5	2	5	0	0	0	2	1	0	3	0	6	3	0	3	2	0	0	0	0	0	0	4	0	0	0	3	0	0	3	5	0	0	0	0	0	1	0	1	1
ABTB2	5	23	30	10	7	9	3	8	15	9	9	30	37	18	19	45	16	25	13	17	9	19	10	23	57	86	22	81	43	16	27	35	18	18	65	46	24	32	39	28
ACAA1	47	70	26	59	22	34	19	30	1	2	25	79	37	82	66	52	2	5	64	59	79	76	72	67	67	84	41	72	58	89	103	36	54	62	34	92	59	26	120	104
ACAA2	60	39	47	103	77	85	74	42	59	34	62	116	61	67	72	42	115	101	119	60	101	136	92	77	83	96	33	100	107	58	144	77	77	74	100	117	90	96	241	113
ACACA	65	73	55	61	77	81	18	67	95	58	58	123	94	114	121	137	126	91	172	156	124	104	119	112	209	294	173	221	100	232	211	117	91	98	105	184	175	146	157	155
ACACB	18	4	19	7	3	5	10	12	24	7	3	6	4	14	15	22	17	13	24	31	23	5	18	7	8	16	18	17	33	24	34	8	18	14	44	5	15	50	30	38
ACAD10	15	4	9	5	9	0	10	6	0	0	9	0	0	0	11	1	0	14	0	6	22	0	5	9	12	2	24	13	0	8	0	6	13	12	3	21	34	16	0	15
ACAD11	44	84	21	47	56	42	34	39	50	100	30	78	86	60	105	104	46	61	107	59	116	103	80	62	118	176	87	148	148	158	173	99	78	57	55	77	50	83	30	38
ACAD8	0	1	0	3	1	0	0	1	0	3	0	1	0	0	7	0	0	0	0	0	0	0	3	1	1	0	0	1	5	13	2	2	0	0	0	4	3	1	17	3
ACAD9	40	11	17	29	15	32	19	16	28	20	8	31	68	41	44	29	37	25	63	56	49	19	28	28	52	108	19	30	38	37	48	21	26	20	28	46	20	29	34	41
ACADL	0	0	6	17	3	0	6	1	3	2	2	0	12	14	8	13	0	4	17	6	0	0	3	4	0	17	0	0	3	0	0	0	2	0	0	0	0	21	0	4
ACADM	55	18	43	28	32	14	28	15	40	57	46	88	102	68	66	68	77	64	87	68	87	45	72	25	78	112	89	44	105	100	124	110	90	43	40	44	37	62	75	47
ACADS	26	26	26	14	8	21	8	33	18	12	10	5	15	15	15	57	36	13	39	48	50	35	22	41	23	3	20	32	26	20	13	34	31	17	30	27	41	25	52	73
ACADSB	205	235	142	138	201	189	136	143	165	114	65	197	279	205	200	163	194	298	299	312	358	274	369	225	309	434	182	360	302	282	338	212	298	230	368	322	240	342	331	377
ACADVL	35	45	30	42	63	49	36	35	22	67	30	97	41	76	55	53	81	58	79	115	137	60	83	51	92	90	84	74	98	137	139	58	97	91	40	117	80	143	54	115
ACAN	0	0	0	4	0	0	0	0	0	0	0	0	0	0	0	2	0	0	0	0	0	0	0	0	4	0	0	0	0	0	0	0	0	0	0	0	2	0	2	0
ACAP1	2	3	3	0	2	2	2	2	0	0	4	13	3	4	3	0	3	0	6	3	0	4	4	7	1	0	3	0	4	8	12	1	3	5	14	5	1	0	0	3
ACAP2	42	45	52	54	31	44	30	32	37	76	25	110	54	63	67	82	50	53	67	52	67	74	47	50	102	112	52	80	92	135	99	72	41	53	23	53	47	45	83	69
ACAP3	13	0	3	3	0	2	0	0	7	0	2	10	5	1	5	4	2	7	1	7	3	14	9	4	3	20	6	16	10	7	12	4	9	18	15	7	0	10	20	3
ACAT1	63	26	24	32	54	45	23	25	25	35	16	8	5	33	15	87	18	48	74	30	51	51	32	19	26	44	26	64	64	9	53	37	47	41	64	61	56	21	156	35
ACAT2	702	694	419	566	496	551	344	449	460	529	281	619	571	533	619	671	546	619	744	801	936	633	729	637	237	513	247	401	384	424	505	297	601	689	809	886	711	627	1016	888
ACBD3	124	120	88	352	70	104	66	357	107	116	60	97	44	86	250	536	106	121	72	135	170	77	242	392	168	147	127	133	132	126	321	424	57	82	61	114	127	142	441	263
ACBD4	16	23	20	6	12	20	13	14	9	47	8	32	18	20	38	16	35	17	56	29	42	29	27	24	18	19	10	11	21	23	23	9	22	14	25	28	25	26	38	30
ACBD5	26	11	18	48	44	59	34	23	68	97	61	108	93	100	107	77	63	35	45	67	46	51	87	18	251	279	132	313	156	274	180	97	57	50	70	75	52	19	49	66
ACBD6	4	0	0	0	1	1	1	0	0	0	0	1	3	0	0	1	0	0	3	2	0	1	0	1	6	1	0	1	0	0	0	0	1	0	0	0	1	0	0	0
ACBD7	24	12	5	17	13	21	8	6	0	1	9	7	3	0	2	0	11	14	19	29	9	34	8	30	14	0	4	0	0	16	0	0	17	27	11	10	12	26	59	8
ACCS	0	1	1	1	0	1	3	0	1	0	1	1	4	1	3	0	2	0	2	1	0	2	19	0	0	0	0	1	1	0	1	0	0	4	7	3	10	0	1	9
ACCSL	9910	8305	6880	8424	7634	8420	5963	6759	9312	10420	6428	15313	13396	11903	15490	15259	10818	11973	14671	13481	16956	13996	13988	10811	28725	48049	20761	33952	31561	35291	34812	29168	13331	14013	15081	17942	13493	16949	21123	16127
ACD	159	135	105	121	110	86	63	62	76	74	80	125	82	150	114	116	89	131	216	162	202	119	172	129	85	150	75	80	98	148	163	66	96	100	167	192	203	115	227	149
ACE	0	0	0	0	4	0	0	6	0	2	0	2	0	0	3	0	0	0	0	5	3	0	0	2	0	11	0	0	0	3	1	0	1	0	11	5	5	8	4	6
ACE2	0	0	0	0	0	0	0	0	4	0	0	0	0	0	0	0	0	0	0	0	0	0	0	0	0	0	0	0	7	0	0	0	0	0	0	0	0	0	0	0
ACE3	0	0	0	0	0	0	0	0	0	4	0	2	0	0	0	0	0	0	1	0	0	0	0	1	0	0	0	0	0	0	1	0	0	1	2	0	0	0	0	0
ACER1	0	0	0	0	0	0	1	0	0	0	0	0	0	0	0	0	0	0	0	0	0	0	0	0	0	3	0	0	0	0	0	0	0	1	0	2	2	0	1	1
ACER2	0	7	0	0	0	2	0	0	0	0	4	0	0	0	0	13	1	0	4	0	0	0	0	0	12	0	16	20	10	0	3	0	3	5	0	0	0	0	0	0
ACER3	56	83	56	62	30	59	45	25	47	47	18	28	59	74	65	88	37	54	75	83	94	48	65	79	49	159	67	100	79	83	96	106	89	61	103	133	72	55	146	107
ACHE	0	0	0	0	0	0	0	0	0	0	0	0	0	0	0	0	0	0	0	0	0	0	0	0	0	0	0	0	0	0	0	0	0	0	0	0	0	0	0	0
ACIN1	52	35	36	38	23	42	34	49	41	34	35	56	59	82	62	59	42	47	38	69	101	56	62	38	96	112	71	106	78	101	115	106	57	43	47	79	50	46	125	69
ACKR1	0	0	0	0	1	0	0	0	0	0	0	0	0	0	0	0	0	0	0	0	0	0	0	0	0	5	0	0	0	0	0	0	0	0	0	0	0	0	0	0
ACKR2	5	1	1	0	0	0	1	4	2	0	0	2	0	5	0	7	7	0	6	1	8	3	4	4	15	13	0	13	1	4	4	0	0	0	2	14	6	10	0	14
ACKR3	0	0	0	0	0	0	0	0	0	0	0	0	0	0	0	0	0	0	0	0	0	0	0	0	0	0	0	0	0	0	0	0	0	0	1	0	0	0	0	0
ACKR4	0	0	0	0	0	0	0	0	0	0	0	0	0	0	0	0	0	0	0	0	0	0	0	0	0	0	0	0	0	0	0	0	0	0	0	0	0	0	0	0
ACLY	1015	1158	656	789	858	940	580	706	786	757	520	1267	1395	1464	1371	1454	1381	1316	1433	1804	1764	1894	1539	955	1472	2325	1195	2024	1399	1722	1151	1092	1338	998	1513	2296	1240	1848	974	1592
ACMSD	0	0	0	0	0	0	0	0	0	0	0	0	0	0	0	0	0	0	0	0	0	0	0	0	0	0	0	0	0	0	0	0	0	0	0	0	0	0	0	0
ACO1	78	74	48	85	54	61	36	62	64	68	39	86	88	59	54	70	114	75	81	107	185	130	116	88	94	138	90	137	120	157	116	94	114	80	71	128	160	119	177	131
ACO2	47	58	52	64	60	41	27	34	72	100	29	121	46	80	57	39	58	104	92	56	101	57	96	67	63	129	32	91	67	45	78	71	89	96	83	79	119	75	121	104
ACOD1	1	3	0	0	0	0	0	0	0	0	0	0	0	0	0	0	0	0	0	0	0	0	0	0	0	0	0	0	0	0	0	0	0	0	0	0	0	0	0	0
ACOT11	0	0	0	3	2	0	0	1	0	0	0	0	0	0	0	2	1	1	1	1	1	0	0	1	1	0	0	2	0	0	0	0	0	0	3	0	2	3	0	0
ACOT12	0	1	0	0	0	0	0	0	1	0	0	0	0	0	0	0	0	0	0	0	0	0	0	0	0	0	0	0	0	0	5	0	0	0	0	0	1	0	0	0
ACOT13	11	7	15	12	13	20	2	0	8	15	6	23	24	10	13	58	10	10	34	25	37	25	0	42	11	42	39	29	34	20	75	15	17	30	3	49	3	26	23	40
ACOT2	27	59	12	58	19	36	39	36	9	20	16	33	19	31	49	50	1	1	25	29	11	35	38	51	61	87	48	99	49	38	113	55	43	80	84	65	46	92	88	99
ACOT4	0	0	0	0	0	0	0	0	0	0	0	1	4	0	0	0	0	0	0	0	0	0	0	0	0	0	8	0	0	0	1	0	0	0	0	0	0	0	0	0
ACOT6	0	0	0	0	0	0	0	0	0	0	1	0	0	0	1	0	0	0	0	1	0	0	0	0	0	0	0	0	0	0	0	0	0	0	0	12	0	0	0	0
ACOT7	16	14	12	10	12	12	6	11	11	7	4	22	8	15	5	12	10	8	14	14	9	7	13	9	1	23	4	7	20	6	10	8	11	6	10	17	7	4	28	9
ACOT8	12	8	5	19	2	13	9	17	6	9	5	21	9	21	35	38	14	12	21	13	8	20	24	17	11	32	0	6	14	24	26	7	15	21	11	34	23	14	40	14
ACOT9	373	343	187	241	234	297	180	176	204	223	141	306	187	206	221	215	259	303	341	320	416	277	316	366	248	234	175	264	259	326	396	222	201	408	212	243	240	214	354	215
ACOX1	24	20	19	30	5	16	15	12	26	4	7	8	90	40	42	108	12	7	5	16	59	39	35	18	115	170	83	91	107	94	72	55	21	25	52	53	52	92	75	31
ACOX2	0	0	0	0	0	0	0	0	0	0	0	0	0	0	0	0	0	0	0	0	0	0	0	0	0	0	0	0	0	0	0	0	0	0	0	0	0	0	0	0
ACOX3	0	0	0	0	0	1	0	0	1	6	0	0	0	0	0	4	0	1	2	0	1	0	0	0	0	0	0	0	5	0	3	0	1	0	0	0	0	0	3	0
ACOXL	8	0	0	2	0	3	0	1	1	2	1	4	4	0	0	0	2	3	2	4	5	6	0	7	2	0	4	0	4	5	4	2	5	3	0	8	8	11	8	9
ACP1	128	96	99	116	50	109	77	94	15	20	25	89	27	71	96	70	4	8	78	84	205	186	148	122	46	100	35	43	64	44	98	86	152	158	170	251	226	150	241	192
ACP2	8	5	5	9	6	7	4	3	2	11	8	14	9	10	21	14	15	15	13	15	23	5	15	7	8	5	8	7	6	8	8	6	10	10	10	31	9	16	13	28
ACP4	0	0	0	1	0	1	0	0	0	0	0	1	0	0	0	0	0	0	0	0	1	0	0	0	0	0	0	1	0	3	0	0	0	0	0	0	0	1	0	0
ACP5	5	0	8	0	0	5	0	0	0	0	0	0	1	8	0	0	8	6	0	0	0	2	4	3	0	0	0	6	0	0	0	0	0	0	22	0	7	5	11	3
ACP6	89	105	58	113	48	87	48	28	57	83	46	116	77	81	88	95	97	90	76	93	111	81	102	115	112	369	61	111	173	151	164	79	72	89	61	129	95	80	188	109
ACP7	0	0	0	0	0	2	0	2	0	0	0	0	0	0	0	0	0	0	0	0	0	0	0	0	1	0	0	0	4	0	0	0	0	2	0	0	0	0	0	0
ACPP	0	0	0	0	0	0	0	2	0	2	0	0	0	0	0	0	0	0	0	0	0	0	0	0	0	0	0	0	0	0	0	0	0	0	0	0	0	0	0	0
ACR	0	0	0	0	0	0	0	0	0	0	0	0	0	0	0	0	0	0	0	0	0	0	0	0	0	0	0	0	0	0	0	0	0	0	0	0	0	0	0	0
ACRBP	0	0	0	0	0	0	0	0	0	0	0	0	0	0	0	0	0	0	0	0	0	0	0	0	0	0	0	0	0	0	0	0	0	1	0	0	0	0	0	0
ACRV1	53	37	41	40	35	59	36	32	12	19	13	27	47	11	35	39	34	62	50	38	75	55	47	19	49	151	35	82	105	65	97	63	51	50	81	110	46	70	165	72
ACSBG1	0	0	0	0	0	0	0	0	0	0	0	0	0	0	4	0	0	0	0	0	0	0	0	4	0	5	0	0	0	0	6	18	0	0	0	1	0	0	0	0
ACSBG2	0	0	0	0	0	0	2	0	0	0	0	11	0	4	0	0	8	3	1	3	0	0	2	0	0	0	0	7	0	3	1	0	0	6	0	6	0	0	7	0
ACSF2	0	0	0	0	0	1	0	0	0	0	0	0	6	1	0	0	0	0	0	0	0	0	0	0	0	0	0	0	0	0	0	0	0	0	0	0	0	0	0	0
ACSF3	0	0	1	1	1	0	0	0	1	8	2	6	0	7	0	0	0	1	0	0	0	0	0	0	0	0	3	6	2	0	0	0	0	0	0	0	0	0	0	0
ACSL1	17	30	24	22	42	22	15	22	49	11	13	44	3	25	38	50	48	56	56	41	54	20	67	16	25	86	21	68	23	36	56	46	22	26	28	56	9	19	15	13
ACSL3	488	535	389	515	381	535	353	304	96	99	310	867	822	871	883	1035	30	59	569	497	671	601	606	360	1000	1284	858	933	759	1187	944	748	531	390	441	739	506	667	437	580
ACSL4	48	22	12	33	23	28	19	34	17	36	14	89	19	30	70	27	40	38	52	26	36	16	0	43	45	91	4	31	67	33	77	0	13	6	25	27	18	43	41	45
ACSL5	34	65	30	27	33	53	30	24	34	62	28	43	75	72	44	29	48	43	46	57	80	67	102	35	66	139	32	48	48	75	87	45	60	69	36	138	103	84	40	82
ACSL6	12	16	9	9	15	11	5	5	6	0	7	16	22	17	20	16	7	32	22	8	10	22	22	18	9	23	16	6	7	23	16	41	19	34	19	21	23	34	28	20
ACSM1	0	0	0	0	0	0	0	0	0	0	0	0	0	0	0	0	0	0	0	0	0	0	0	0	0	0	0	0	0	0	0	0	0	0	0	0	0	0	0	0
ACSM2B	0	0	0	0	0	0	0	0	0	0	0	0	0	0	0	0	0	0	0	0	0	0	0	0	0	0	0	0	0	0	0	0	0	0	0	0	0	0	0	0
ACSM3	4	4	5	1	1	3	0	1	1	1	1	0	5	7	3	5	5	8	1	1	2	2	3	3	1	5	2	6	0	1	1	3	8	1	3	7	3	4	3	4
ACSM4	66	70	68	52	53	47	38	49	36	66	27	71	78	74	92	77	63	104	61	100	90	51	48	84	89	131	72	120	128	110	147	54	107	110	84	145	121	134	114	83
ACSM5	0	0	0	0	0	0	0	0	0	0	0	0	0	0	0	0	0	0	0	0	0	0	0	0	0	0	0	0	0	0	0	11	0	0	0	0	0	0	0	0
ACSS1	0	0	3	0	0	0	0	3	0	0	0	0	0	0	2	0	0	0	0	0	0	1	11	6	9	16	9	7	0	11	0	4	0	3	0	0	0	2	0	0
ACSS2	5	15	17	3	1	15	2	10	10	0	3	2	0	2	10	18	26	13	5	22	20	14	18	3	16	2	14	29	11	24	16	0	2	2	23	1	29	14	7	19
ACSS3	0	10	1	0	0	0	0	6	16	1	13	6	0	9	1	3	9	13	0	5	6	5	0	8	10	22	6	8	0	12	1	15	0	13	8	0	0	1	1	36
ACTA1	0	0	0	0	0	0	1	0	0	0	0	0	0	4	0	0	0	0	0	0	1	0	0	0	0	0	0	0	0	3	0	3	0	0	8	0	0	0	5	3
ACTA2	3	4	0	16	2	1	0	0	8	2	3	5	7	6	16	7	0	0	0	0	7	0	0	0	8	7	0	0	10	0	0	6	5	9	20	23	4	12	18	11
ACTB	1502	1178	1093	1400	1104	1339	814	953	1348	1458	891	1955	1740	1682	2118	2272	1433	1476	1874	1599	1948	1612	1949	1389	3335	5998	2057	3783	3272	3685	3844	3219	1802	2100	2633	2648	2261	2776	3013	2582
ACTBL2	0	0	0	0	0	0	0	0	0	0	0	0	0	0	0	0	0	0	0	0	0	0	0	0	0	0	0	0	0	0	0	0	0	0	0	0	0	0	0	0
ACTC1	0	0	0	0	0	0	0	0	0	0	0	0	0	0	0	0	3	0	4	0	0	0	0	0	0	0	0	0	0	0	0	1	0	0	0	0	0	0	8	0
ACTG1	353	264	267	337	321	411	234	373	358	372	240	578	366	414	490	553	380	427	565	649	738	557	675	421	1090	1650	1006	1084	1061	1358	1343	1059	518	542	636	789	614	537	784	599
ACTG2	0	0	0	0	0	0	0	0	0	0	0	0	0	0	0	0	0	0	0	0	0	0	0	0	0	0	0	0	0	0	0	0	0	0	0	0	0	0	0	0
ACTL6A	123	150	105	138	126	158	128	124	139	76	48	169	108	185	142	145	123	182	197	153	239	175	189	137	207	287	143	242	230	223	283	169	151	230	185	252	277	220	215	210
ACTL6B	0	0	0	0	2	0	2	0	0	0	0	0	0	2	3	0	0	0	0	0	0	0	0	4	3	0	0	0	1	3	0	4	1	0	0	0	0	0	0	0
ACTL7A	0	0	0	0	0	0	0	0	0	0	0	0	0	0	0	0	0	0	0	0	0	0	0	0	0	0	0	0	0	0	0	0	0	0	0	0	0	0	0	0
ACTL7B	1	0	1	0	0	0	0	0	4	0	6	3	2	1	0	4	0	0	6	1	1	0	1	1	0	3	0	2	3	5	1	1	2	2	2	3	0	0	0	2
ACTL8	13	14	10	12	13	12	4	12	5	3	1	5	3	2	18	4	3	0	3	1	0	9	1	2	36	28	36	22	14	30	13	16	4	1	3	7	3	0	3	5
ACTL9	0	0	3	0	0	0	0	0	0	0	0	0	0	0	0	0	0	0	0	0	0	0	0	0	1	0	0	0	0	2	0	0	0	1	1	1	0	0	1	0
ACTN1	152	183	237	166	18	83	115	150	32	31	18	40	215	206	160	233	35	63	50	64	116	239	333	245	130	265	142	236	214	293	227	169	145	194	201	257	234	293	325	267
ACTN2	3	0	0	3	0	0	0	0	0	0	1	0	0	0	0	0	0	0	0	0	10	0	0	0	0	0	0	2	0	4	0	8	0	0	0	0	1	0	0	0
ACTN3	0	0	0	0	0	0	0	0	0	0	0	0	0	0	0	0	0	0	0	0	0	0	0	0	0	0	0	0	0	0	0	0	0	0	0	0	0	0	0	0
ACTN4	67	101	72	89	78	80	46	67	63	80	43	133	119	101	99	163	106	83	97	114	178	98	126	65	91	236	60	135	94	113	121	92	101	81	119	110	70	108	141	123
ACTR10	199	98	74	118	130	117	80	135	100	87	84	145	174	155	184	183	87	138	95	129	205	157	160	116	259	476	179	323	287	336	539	311	155	139	148	317	237	140	276	258
ACTR1A	174	206	150	168	178	185	118	146	173	119	63	178	158	196	193	194	216	192	225	198	314	220	194	129	303	214	230	294	281	188	194	284	201	122	188	397	251	220	343	333
ACTR1B	0	3	4	3	1	1	1	0	0	3	0	1	0	0	3	3	1	0	4	7	5	2	4	3	0	5	2	2	1	1	10	0	0	4	6	10	7	4	5	0
ACTR2	306	406	326	451	502	513	252	308	339	440	245	545	600	403	427	487	485	547	693	568	1030	591	622	425	504	1086	510	751	793	818	814	622	490	514	655	904	700	692	695	758
ACTR3	245	333	242	268	289	294	175	183	250	267	176	393	307	341	374	531	308	330	417	552	509	427	480	344	552	753	425	580	488	696	658	492	390	428	504	489	348	527	648	576
ACTR3B	3	0	7	5	0	2	4	9	2	4	0	6	0	2	27	16	0	2	0	3	0	8	19	7	4	19	6	6	11	23	14	27	9	4	14	3	7	15	31	24
ACTR5	5	0	6	1	0	0	0	0	0	5	0	0	0	6	4	17	0	0	0	0	0	8	0	0	0	2	1	0	16	12	10	0	4	0	0	0	3	0	0	0
ACTR6	260	305	209	225	200	246	154	147	191	226	163	280	220	189	304	314	193	300	417	347	361	335	385	238	174	324	260	241	289	291	465	255	288	348	397	276	255	264	328	334
ACTR8	56	69	42	61	48	62	31	50	36	63	30	79	69	101	65	51	42	86	64	25	93	58	113	36	86	125	25	174	148	82	199	108	42	66	36	104	119	53	45	135
ACTRT2	0	0	0	0	0	0	0	0	0	0	0	0	0	0	0	0	0	0	0	0	0	0	0	0	0	0	0	0	0	0	0	0	0	0	0	0	0	0	0	0
ACTRT3	17	0	0	3	0	0	3	5	0	0	0	18	0	0	5	5	0	10	9	15	2	5	0	3	0	1	0	16	0	1	2	6	9	0	1	3	17	0	22	19
ACVR1	40	37	19	44	6	47	19	10	18	33	18	57	45	16	36	22	8	31	52	51	126	35	21	42	20	16	8	46	42	14	53	6	29	48	20	89	28	40	61	63
ACVR1B	18	24	37	21	42	43	32	29	7	13	12	30	18	15	22	49	33	14	45	37	54	33	27	29	27	53	35	55	53	79	59	52	12	26	37	35	25	22	80	50
ACVR1C	0	0	0	0	0	0	0	0	0	0	0	0	0	0	0	0	0	0	0	2	0	5	0	0	0	0	0	0	0	0	0	0	0	0	0	0	0	0	0	1
ACVR2A	32	26	13	55	6	34	30	41	10	5	14	28	14	35	64	62	12	8	6	14	66	80	67	88	51	74	19	35	49	47	106	41	29	86	80	97	37	134	180	95
ACVR2B	38	25	37	68	21	43	20	15	25	19	5	14	5	22	10	36	23	20	49	34	36	30	59	31	32	32	12	2	33	25	35	15	32	27	34	4	34	24	77	47
ACVRL1	0	0	0	0	1	0	0	0	7	0	1	0	1	0	7	5	0	0	0	0	3	0	0	0	0	0	1	3	0	2	1	0	0	0	0	0	0	0	0	1
ACY1	4	5	0	1	1	7	0	0	0	0	4	1	3	0	0	2	1	1	0	0	5	0	2	4	0	12	3	15	8	3	0	0	0	0	4	14	0	0	0	0
ACYP1	13	7	7	11	12	15	6	13	5	5	8	36	19	34	24	33	8	34	24	20	29	20	20	21	14	36	18	29	23	26	22	22	24	22	26	29	17	34	45	34
ACYP2	7	3	4	2	17	18	3	4	21	11	10	27	16	24	30	24	6	9	34	22	26	21	26	20	9	28	21	15	1	26	24	16	14	8	8	18	32	23	25	21
ADA	12	7	4	5	11	2	11	11	12	9	9	15	8	13	7	32	18	12	14	34	24	18	22	34	20	14	3	22	8	21	0	10	10	24	11	11	24	24	34	36
ADA2	0	0	0	0	0	0	0	0	0	0	0	0	0	0	0	0	0	0	0	0	0	0	0	0	0	0	0	0	0	0	0	0	0	0	0	0	0	0	0	0
ADAD1	197	146	104	146	133	86	67	98	100	60	60	150	152	100	147	131	108	108	150	127	212	153	135	131	164	207	86	65	146	145	159	113	237	232	233	289	253	180	356	317
ADAD2	7	8	8	7	5	9	3	5	6	19	2	19	16	8	19	22	5	3	16	16	6	16	11	9	13	3	4	20	9	8	7	3	4	10	2	11	3	20	9	3
ADAL	99	71	51	107	98	137	37	62	53	93	55	78	95	98	67	88	103	74	71	164	247	139	82	118	91	183	90	102	100	135	114	120	96	99	85	119	107	107	159	67
ADAM10	358	463	291	371	367	364	233	279	421	375	199	454	496	443	504	549	520	539	798	563	653	491	534	399	730	905	449	767	616	738	683	656	500	586	670	729	527	600	804	585
ADAM11	1	8	11	22	8	10	7	1	7	5	7	9	5	23	11	13	16	13	19	8	12	18	24	13	8	59	13	3	18	5	6	13	10	13	16	8	12	16	35	16
ADAM12	9	16	14	6	9	27	16	11	11	6	5	13	14	16	20	13	13	26	12	35	29	16	26	23	17	28	23	5	27	26	26	16	18	16	34	40	16	22	29	27
ADAM15	0	1	0	0	0	1	0	0	0	0	0	0	0	1	0	0	0	0	0	0	0	0	0	0	6	0	1	4	0	0	0	0	0	0	0	3	0	0	0	0
ADAM17	41	22	43	40	34	38	36	26	58	66	32	110	87	91	50	63	61	54	88	49	68	70	51	55	78	158	59	126	94	97	94	70	59	68	45	81	77	52	115	74
ADAM18	0	0	0	0	0	0	0	0	0	0	0	0	0	0	0	0	0	0	0	0	0	0	0	0	0	0	0	0	0	0	0	0	0	0	0	0	0	0	0	0
ADAM19	331	326	213	309	267	323	155	228	237	184	156	330	315	261	263	313	336	294	345	338	426	319	367	259	571	918	375	641	539	664	611	558	521	548	600	701	615	718	1153	594
ADAM1A	0	0	0	0	0	0	0	0	0	0	0	0	0	0	0	0	0	0	0	0	0	0	0	0	0	0	0	0	0	0	0	0	0	0	0	0	0	0	0	0
ADAM2	0	0	0	0	0	0	0	0	0	0	0	0	0	0	0	0	0	0	0	0	0	0	0	0	0	0	0	0	0	0	0	0	0	0	0	0	0	0	0	0
ADAM20	0	0	4	1	0	0	0	5	0	5	0	0	0	0	0	0	0	0	0	0	0	4	2	0	0	21	0	0	0	0	1	0	0	6	0	0	0	0	0	3
ADAM21	0	0	0	0	0	0	0	0	0	0	0	0	0	0	0	0	0	0	0	0	0	0	0	0	1	0	0	0	0	0	0	0	0	0	0	0	0	0	0	0
ADAM22	0	0	0	6	2	0	0	0	1	1	4	7	0	3	0	20	2	9	11	4	10	0	9	0	7	0	0	7	9	0	0	0	13	2	8	3	4	5	29	14
ADAM23	0	0	2	11	1	0	0	2	0	0	0	0	1	0	4	0	0	0	0	3	1	0	2	3	0	0	0	0	0	4	19	5	0	0	0	0	2	2	2	7
ADAM29	0	0	0	0	0	0	0	0	0	0	0	0	0	0	0	0	0	0	0	0	0	0	0	0	0	0	0	0	0	0	0	0	0	0	0	0	0	0	0	0
ADAM32	0	0	0	0	0	0	0	0	0	0	0	0	0	0	0	0	0	0	0	0	0	5	0	0	0	0	0	0	1	0	0	0	3	0	0	0	3	2	0	0
ADAM33	0	0	0	0	0	0	0	0	0	0	0	0	0	0	0	0	0	0	0	0	0	0	0	0	0	0	0	0	0	0	0	0	0	0	0	0	0	0	0	0
ADAM3A	0	0	0	0	0	0	0	0	0	0	0	0	0	0	0	0	0	0	0	0	0	0	0	0	0	0	0	0	0	0	0	0	0	0	0	0	0	0	0	0
ADAM7	0	0	0	0	0	0	0	0	0	0	0	0	0	0	0	0	0	0	0	0	0	0	0	0	0	0	0	0	0	0	0	0	0	0	0	0	0	0	0	0
ADAM8	2	1	0	0	0	0	0	0	0	0	1	0	0	0	0	0	0	0	0	0	0	0	0	0	2	0	0	0	0	0	0	0	0	0	0	0	0	0	0	0
ADAM9	2	0	0	7	2	1	1	0	0	0	5	0	0	9	7	0	1	1	10	3	7	9	11	8	0	3	1	0	6	7	0	6	8	3	2	8	0	19	0	8
ADAMDEC1	0	0	0	0	0	0	0	0	11	0	2	0	0	0	7	0	0	0	0	6	0	0	0	0	0	0	0	0	0	0	0	4	0	0	0	0	0	0	10	0
ADAMTS1	0	0	0	0	0	0	0	0	0	0	0	0	0	0	0	0	0	0	0	0	0	0	0	0	0	0	0	0	0	0	0	0	1	0	0	0	0	0	0	0
ADAMTS10	0	0	0	0	0	0	0	0	0	0	0	0	0	0	0	0	0	0	0	0	0	0	0	0	0	0	0	0	0	0	0	1	0	0	0	0	0	0	0	0
ADAMTS12	33	8	17	27	13	29	20	38	9	34	7	31	35	29	17	29	23	45	40	37	54	33	43	37	34	54	35	23	23	44	52	26	22	22	14	40	30	35	25	28
ADAMTS13	0	0	0	0	0	0	0	0	0	0	0	0	0	0	0	0	0	0	0	0	1	0	0	0	0	0	0	0	0	0	0	0	0	0	0	0	0	0	0	0
ADAMTS14	6	5	6	5	4	14	1	5	1	3	3	5	4	1	9	10	1	10	9	6	8	6	13	2	10	17	7	16	21	10	7	9	6	25	10	24	10	18	14	20
ADAMTS15	0	0	0	0	0	0	0	0	0	0	0	0	0	0	0	0	0	0	0	0	0	0	2	0	0	0	0	0	0	0	0	0	0	0	0	0	0	0	0	0
ADAMTS16	3	1	5	0	0	0	1	0	9	0	0	4	0	5	0	6	0	0	6	5	0	0	0	0	0	0	0	0	0	0	0	0	2	0	0	0	0	0	0	8
ADAMTS17	1	0	0	0	0	1	0	2	0	2	1	9	1	2	3	6	1	6	0	0	1	0	1	2	1	0	0	0	3	0	4	5	1	0	2	3	0	0	6	8
ADAMTS18	72	116	46	122	62	64	29	61	47	48	38	51	104	157	92	213	130	127	159	100	179	146	194	84	162	355	125	247	137	167	150	91	142	94	92	143	115	175	154	109
ADAMTS19	0	0	0	0	0	0	0	0	0	0	0	0	0	0	2	0	0	0	0	0	0	0	0	0	5	19	0	0	4	0	4	0	7	10	0	0	9	0	0	0
ADAMTS2	0	6	0	2	0	0	0	0	3	5	0	7	0	0	0	8	0	0	4	0	0	8	0	1	8	21	0	0	0	0	2	0	6	3	0	19	0	2	0	4
ADAMTS20	0	8	0	0	1	0	0	0	0	0	0	0	0	0	0	0	0	0	0	0	1	3	0	0	1	2	0	1	4	9	0	0	0	0	0	3	7	0	0	0
ADAMTS3	1	2	3	0	0	0	0	3	2	0	0	0	0	0	11	3	0	0	3	0	9	0	6	0	0	0	7	0	3	20	0	0	0	5	0	20	10	0	13	0
ADAMTS4	44	57	37	33	52	62	27	29	27	31	23	52	83	79	40	114	73	135	112	102	110	74	100	59	97	151	73	35	86	43	85	71	78	104	126	155	49	131	82	97
ADAMTS5	0	0	0	0	0	0	0	0	0	0	0	0	0	0	0	0	0	0	0	0	0	0	0	0	0	0	0	0	0	0	0	0	0	4	0	0	0	0	0	6
ADAMTS6	0	0	1	0	0	0	0	0	0	0	0	0	0	0	0	0	8	0	2	0	0	6	0	5	0	0	0	1	3	0	0	0	9	1	6	0	4	0	0	4
ADAMTS7	16	3	3	6	2	8	1	6	0	0	1	0	6	8	20	13	3	0	2	8	9	10	21	14	3	4	9	0	14	25	26	1	8	5	18	18	18	20	20	4
ADAMTS8	0	0	0	0	0	0	0	0	1	0	0	0	0	0	0	1	0	0	0	0	0	0	0	0	0	0	0	0	0	0	0	0	0	0	0	0	0	0	3	0
ADAMTS9	25	0	0	1	4	17	1	2	5	1	0	3	3	3	6	11	0	6	14	5	2	0	12	11	0	0	10	10	5	0	5	7	16	18	7	11	0	0	0	20
ADAMTSL1	64	74	42	62	55	73	33	34	56	78	20	113	90	118	151	95	90	98	173	97	123	153	89	86	79	81	96	103	89	56	61	62	82	87	115	116	124	118	147	77
ADAMTSL2	0	0	0	0	0	0	0	0	0	0	0	0	0	0	0	0	0	0	0	0	0	0	0	0	0	0	0	0	0	0	0	0	0	0	0	0	0	0	0	0
ADAMTSL3	0	0	0	0	0	0	0	0	0	0	0	0	0	0	0	0	0	0	0	0	0	0	0	0	0	0	0	0	0	0	0	0	0	0	0	0	0	0	0	0
ADAMTSL4	0	0	0	0	0	0	0	0	0	0	0	1	0	0	0	0	0	0	3	0	0	0	0	0	0	0	0	0	0	0	0	0	0	0	0	0	0	0	0	0
ADAMTSL5	2	1	7	7	14	3	3	0	18	23	8	10	17	13	38	7	13	13	15	14	19	10	17	8	18	77	29	30	44	62	35	22	4	12	25	31	5	18	30	15
ADAP1	29	60	37	49	50	50	21	37	60	60	34	96	121	75	78	89	53	63	68	49	131	61	109	75	86	204	71	151	81	117	109	74	29	61	65	72	49	66	78	83
ADAP2	0	0	0	0	0	0	0	0	1	0	0	0	0	0	0	0	0	0	0	0	0	0	3	0	0	0	2	0	0	0	2	0	1	0	0	6	0	0	0	0
ADAR	277	282	212	283	253	280	164	189	195	337	171	344	370	397	309	351	260	352	357	355	484	317	343	282	484	850	410	441	436	628	457	344	304	287	451	385	336	440	548	348
ADARB1	8	0	0	0	17	2	4	0	0	0	8	9	10	6	10	21	6	3	12	3	4	14	6	13	2	10	0	1	1	3	13	12	2	5	9	13	1	18	18	22
ADARB2	0	0	0	0	0	0	0	0	0	0	0	0	0	0	0	0	0	0	0	0	0	0	0	0	0	0	0	0	0	0	0	0	0	0	0	0	0	0	0	0
ADAT1	60	15	17	4	10	23	15	7	13	24	10	40	26	31	37	27	17	27	15	24	45	12	28	12	46	33	16	14	24	12	26	27	28	19	47	20	26	29	43	45
ADAT2	5	6	1	2	4	4	2	5	4	0	12	9	3	0	11	0	3	11	18	16	22	6	5	17	48	0	5	2	15	31	26	0	13	17	11	17	16	8	14	18
ADCK1	65	44	91	49	36	36	40	34	58	73	47	90	70	80	84	99	52	46	86	90	100	62	99	53	91	173	54	97	107	127	83	65	94	68	108	118	100	82	153	91
ADCK2	11	15	8	19	5	14	7	17	9	7	2	8	17	27	16	16	2	15	6	11	15	11	22	18	19	22	8	34	18	18	21	11	33	28	18	35	19	36	47	32
ADCK5	3	6	5	1	3	4	0	0	1	0	0	8	14	0	2	4	0	5	1	3	14	4	13	1	0	0	1	8	3	7	6	3	2	1	0	6	0	1	3	5
ADCY1	0	0	0	0	0	0	0	0	0	0	0	0	0	0	0	0	0	0	0	0	0	0	0	0	0	0	0	0	0	0	0	0	0	0	0	0	0	0	0	0
ADCY10	0	0	0	0	0	0	0	0	0	0	0	0	0	0	0	0	0	0	0	0	0	0	0	0	0	0	0	0	0	0	0	0	0	0	0	0	0	0	0	0
ADCY2	25	7	10	21	5	36	10	15	17	8	6	18	0	21	10	14	4	2	19	10	31	16	15	26	18	31	7	16	38	19	41	15	0	13	53	17	38	17	32	28
ADCY3	16	9	7	8	13	8	1	4	8	6	5	11	3	7	8	8	12	14	15	9	24	14	23	17	2	1	9	2	12	10	10	6	14	10	14	10	12	13	10	16
ADCY4	0	0	0	0	0	0	1	0	0	0	0	0	0	0	0	0	0	0	0	0	0	0	0	0	0	0	0	0	0	0	0	0	0	0	0	0	0	0	0	0
ADCY5	0	2	0	0	0	0	2	3	0	1	1	5	3	1	10	6	1	0	11	7	3	0	5	21	1	4	2	2	1	1	13	4	0	6	0	0	5	2	1	8
ADCY6	5	3	4	11	0	9	8	3	5	2	0	7	14	14	12	11	7	7	0	5	4	7	5	13	0	35	2	0	3	0	6	8	12	2	20	4	15	0	23	15
ADCY7	12	8	10	5	3	5	5	5	9	13	9	20	13	13	18	5	4	15	6	14	17	6	13	7	6	9	16	1	27	27	38	15	23	15	12	29	17	36	87	36
ADCY8	0	0	0	0	0	0	1	0	0	0	1	0	0	3	0	0	0	3	0	0	0	0	0	0	0	0	0	0	0	8	4	5	0	3	0	0	7	0	15	0
ADCY9	69	64	53	65	70	79	54	46	49	59	25	53	46	127	69	57	45	61	123	78	105	122	72	66	83	157	74	106	78	91	136	38	96	106	54	93	110	107	167	144
ADCYAP1	1	0	1	0	0	1	0	1	0	8	0	0	0	2	2	0	1	8	0	0	4	0	2	0	0	22	0	0	2	2	1	0	6	3	0	0	1	6	14	10
ADCYAP1R1	0	0	0	0	0	0	0	0	0	0	0	0	4	0	3	0	0	0	0	0	0	0	0	0	0	0	0	0	0	0	0	0	0	0	0	0	0	0	0	0
ADD1	109	163	183	179	82	94	97	120	85	72	74	136	140	170	132	218	91	99	134	113	193	200	258	162	184	322	162	290	197	283	197	199	188	151	121	293	177	200	332	216
ADD2	10	1	4	6	36	19	2	21	1	11	0	11	15	12	36	35	6	14	32	48	39	25	32	23	0	0	16	37	0	10	5	4	17	22	18	0	67	9	7	22
ADD3	655	684	607	684	673	718	467	439	688	744	481	1214	1136	1080	1249	1132	825	925	1100	984	1230	1166	874	700	1942	2846	1355	2186	1820	1810	1980	1568	859	881	1128	1143	860	1103	1024	960
ADGB	0	0	1	0	0	0	0	0	0	0	0	0	0	0	0	0	0	0	0	0	0	0	0	0	0	0	0	0	0	0	0	0	0	0	0	0	0	0	0	0
ADGRA1	0	0	0	0	0	0	0	0	0	0	0	0	0	0	0	0	0	0	0	0	0	0	0	0	0	0	0	0	0	0	1	0	0	0	0	0	0	0	0	0
ADGRA2	1	11	3	5	4	1	2	1	0	0	0	4	0	3	1	1	4	0	7	4	8	7	7	4	0	8	0	1	9	2	1	0	1	4	1	6	10	0	10	2
ADGRA3	84	57	21	67	89	43	52	102	60	102	45	95	83	52	116	72	63	71	109	124	108	54	109	79	61	159	72	88	158	203	142	76	46	99	114	178	112	103	116	88
ADGRB1	0	0	0	0	0	0	0	0	0	0	0	0	0	0	0	0	0	0	0	0	0	0	0	0	0	0	0	0	0	0	0	0	0	0	0	0	0	0	0	0
ADGRB2	14	6	1	10	8	6	2	3	0	0	3	3	7	0	13	15	8	9	5	2	9	1	5	3	0	9	1	1	2	7	5	0	7	1	0	13	11	8	35	1
ADGRB3	1	25	12	16	4	6	9	0	4	12	3	1	8	11	9	20	9	8	17	5	24	17	11	22	13	14	9	13	11	19	18	3	23	6	17	14	14	28	19	25
ADGRD1	0	0	0	0	0	2	0	0	0	0	1	0	8	5	7	13	5	0	0	0	0	0	0	0	0	14	0	0	0	0	4	0	0	1	7	0	0	0	0	6
ADGRD2	0	0	0	0	0	0	0	0	0	0	0	0	0	0	0	0	0	0	0	0	0	0	0	0	0	0	0	0	0	0	0	0	0	0	0	1	0	0	3	0
ADGRE3	0	0	0	0	0	0	0	0	0	0	0	0	0	0	0	0	0	0	0	0	0	0	0	0	0	0	0	0	0	0	0	0	0	0	0	0	0	0	0	0
ADGRE5	41	45	36	22	22	24	8	26	34	24	19	40	42	45	44	51	75	58	48	76	40	71	50	43	35	25	51	64	24	26	34	43	50	77	50	85	79	78	106	110
ADGRF1	0	0	0	0	0	0	0	0	0	0	0	0	0	0	0	0	0	0	0	0	0	0	0	0	0	0	0	0	0	0	0	0	0	0	0	0	0	0	0	0
ADGRF2	0	0	4	0	1	11	0	3	2	0	0	0	0	0	0	0	0	0	0	0	0	6	0	0	0	0	10	0	2	0	5	0	2	1	19	42	9	0	10	0
ADGRF3	0	0	0	0	0	14	0	1	0	0	4	0	0	2	0	0	0	10	0	0	0	2	0	0	0	0	2	0	0	0	0	0	5	0	0	0	0	0	3	6
ADGRF4	0	0	0	0	0	0	0	0	3	0	0	0	0	0	0	0	0	0	0	0	0	0	0	0	0	0	0	0	0	0	5	0	0	0	0	0	0	0	0	4
ADGRF5	0	0	0	0	0	0	0	0	0	0	0	0	0	0	0	0	0	0	0	0	0	0	0	0	0	0	0	0	0	4	0	1	0	4	0	0	9	0	0	0
ADGRG1	32	37	31	37	38	6	6	22	16	12	7	56	28	34	29	67	49	31	30	33	42	11	17	11	22	101	12	64	8	43	35	7	34	27	31	19	28	47	11	59
ADGRG2	16	21	9	29	18	17	8	26	14	14	21	12	32	52	31	33	16	15	19	12	5	22	21	16	60	55	14	49	25	19	28	30	4	2	14	21	19	42	26	25
ADGRG3	9	1	4	7	11	7	4	6	3	19	3	28	10	11	15	6	15	12	10	4	24	15	6	0	11	7	19	0	6	4	22	22	3	7	5	37	7	7	14	12
ADGRG5	0	0	0	0	0	4	0	0	0	8	0	1	0	0	7	21	0	8	0	3	0	0	7	0	0	0	0	7	0	0	0	0	0	7	0	3	0	0	0	0
ADGRG6	0	0	0	0	8	5	0	10	1	5	0	0	0	0	12	23	1	5	17	0	14	0	3	2	13	30	0	0	8	3	0	0	2	1	3	0	0	0	17	4
ADGRG7	0	0	0	7	6	0	4	3	6	9	0	15	0	7	16	0	1	5	3	0	7	21	9	3	6	17	0	12	0	9	30	0	0	2	0	29	1	11	13	13
ADGRL1	0	0	0	0	0	5	0	4	0	6	0	0	5	1	0	2	0	0	0	1	7	0	0	2	1	0	0	0	0	0	3	3	1	0	0	1	0	0	10	2
ADGRL2	22	11	18	20	17	25	3	21	9	14	7	17	16	9	28	24	24	32	10	16	45	20	56	16	20	16	39	19	10	18	34	28	12	32	7	51	29	21	38	55
ADGRL3	7	7	4	0	2	1	2	8	5	8	3	10	0	3	20	10	2	3	39	1	23	40	8	1	7	26	0	0	0	7	1	0	16	6	0	22	8	38	1	3
ADGRL4	0	0	0	0	0	0	0	0	0	0	0	0	0	0	0	0	0	0	0	0	0	0	0	0	0	0	0	0	0	0	0	0	0	0	0	0	0	0	0	0
ADGRV1	48	42	43	40	43	59	13	29	24	27	12	34	48	42	27	29	22	63	19	13	97	33	31	23	80	293	48	114	85	60	50	62	37	37	55	112	38	77	51	41
ADH1C	0	0	0	0	0	0	0	0	0	0	0	0	0	0	0	0	0	0	0	0	0	0	0	0	0	0	0	0	0	0	0	0	0	0	0	0	0	0	0	0
ADH4	6	0	0	0	0	0	0	0	0	0	0	0	0	0	0	0	0	0	4	0	0	0	0	0	5	0	0	3	4	0	0	0	4	6	5	0	0	0	0	0
ADH5	198	239	163	249	226	213	192	184	158	173	116	197	138	125	224	224	249	301	308	404	403	279	315	239	265	366	168	298	299	269	414	312	198	278	279	281	232	260	492	356
ADH6	0	0	0	0	0	0	0	0	0	0	0	0	0	0	0	0	0	0	0	0	0	0	0	0	0	0	0	0	0	0	0	0	0	0	0	0	0	0	0	0
ADH7	0	0	0	0	0	0	0	0	0	0	0	0	0	1	0	0	0	0	0	0	0	0	0	0	0	0	0	0	0	0	0	0	0	0	0	0	0	0	0	0
ADHFE1	5	2	3	6	2	5	0	5	13	13	4	14	15	10	19	15	7	5	10	2	10	11	6	1	25	15	2	28	17	14	39	22	15	2	18	20	12	18	63	15
ADI1	44	66	40	52	9	53	24	36	0	0	2	18	60	16	14	40	1	3	11	6	42	44	49	50	29	53	24	26	70	32	44	37	56	61	92	107	76	62	131	80
ADIG	0	0	0	0	0	0	0	0	0	3	0	0	0	0	0	0	0	0	0	0	0	0	0	0	0	0	0	0	0	0	0	0	0	0	0	0	0	0	0	0
ADIPOQ	0	0	0	0	0	0	0	0	0	0	0	0	0	0	0	0	0	0	0	0	0	0	0	0	0	0	0	0	0	0	0	0	0	0	0	0	0	0	0	0
ADIPOR1	709	574	552	493	454	657	331	483	266	302	337	770	655	644	608	785	279	391	792	884	1021	719	672	652	757	1264	532	817	1008	1002	997	762	817	835	984	1510	1151	1189	1254	1155
ADIPOR2	473	361	300	347	273	340	243	336	66	68	138	308	408	584	582	639	105	162	564	464	730	459	524	438	481	1014	388	621	768	902	809	588	351	394	340	632	527	452	661	567
ADIRF	6	3	0	4	5	0	1	1	3	7	1	4	2	8	5	5	1	4	3	2	6	6	5	1	1	0	0	4	8	0	3	1	2	0	6	9	7	1	6	4
ADK	53	77	26	16	16	47	20	31	43	46	26	38	27	71	44	36	14	52	57	79	109	34	52	39	83	89	101	125	97	76	153	79	45	69	97	108	74	72	64	93
ADM	70	82	55	51	51	76	51	56	72	81	62	95	106	154	145	253	122	135	166	186	169	164	138	126	162	241	102	98	99	125	118	155	154	218	259	208	245	215	342	280
ADM2	0	0	0	0	0	0	0	0	0	0	0	0	0	0	0	0	0	0	0	0	1	0	2	0	0	3	0	0	0	0	1	0	0	0	0	0	0	0	0	0
ADM5	3	1	4	0	3	1	0	1	1	1	1	1	1	0	9	0	0	3	0	0	0	2	1	1	4	1	0	0	0	1	4	0	1	1	1	0	1	6	2	0
ADNCR	0	0	0	0	0	0	0	0	0	0	0	1.9	0	0	0	0	0	0	0	0	0	0	0	0	0	0	0	0	0	0	0	0	0	0	0	0	0	0	0	0
ADNP	0	8	0	14	6	16	4	7	7	0	2	2	17	18	0	0	5	14	17	5	10	1	0	2	1	41	0	0	31	3	14	5	40	3	10	23	13	0	10	2
ADNP2	84	43	41	65	41	107	21	52	58	32	45	25	72	69	28	91	49	65	46	65	80	92	67	50	100	132	57	189	79	122	56	131	29	47	6	46	69	45	95	66
ADO	25	18	16	35	18	7	28	31	5	9	5	12	31	13	12	8	9	16	15	41	45	42	9	18	19	26	9	35	25	53	55	11	19	32	32	55	15	62	130	2
ADORA1	38	3	6	0	1	6	11	4	1	0	1	6	13	1	4	11	8	1	4	1	28	11	14	18	0	0	0	0	6	0	0	0	3	3	5	15	5	15	9	36
ADORA2A	0	0	0	0	0	0	0	0	0	0	0	0	0	0	0	0	0	0	0	0	0	0	0	0	0	0	0	0	0	0	0	0	0	0	0	0	0	0	0	0
ADORA2B	52	41	26	66	40	45	37	31	16	20	9	40	75	45	86	57	9	26	34	65	73	62	79	76	38	99	32	84	48	49	59	56	77	78	77	105	85	83	152	106
ADORA3	0	0	0	0	0	0	0	0	0	0	0	0	0	0	0	0	0	0	0	0	3	0	0	0	0	0	0	0	0	0	0	0	1	0	0	0	0	0	0	0
ADPGK	5	5	3	0	0	2	2	3	0	0	6	2	15	0	4	9	0	0	6	4	0	13	0	4	5	0	10	8	1	3	2	14	2	1	31	7	0	27	2	11
ADPRH	0	0	3	2	0	0	0	0	0	0	0	0	0	3	0	0	0	0	0	5	0	0	0	0	0	0	0	0	0	0	11	0	0	2	0	0	0	0	0	0
ADPRHL1	0	0	0	0	0	0	0	0	0	0	0	0	0	0	0	0	0	0	0	0	0	0	0	0	0	0	0	0	0	0	0	0	0	0	0	0	0	0	0	0
ADPRHL2	0	0	0	0	0	0	0	0	0	0	0	0	0	0	0	0	0	2	1	0	3	0	0	0	0	0	0	0	0	0	0	0	1	0	0	8	0	0	0	0
ADPRM	11	3	2	4	7	8	8	8	4	7	5	8	2	10	2	1	16	5	2	15	6	17	12	6	14	54	17	12	17	11	11	23	8	4	14	2	15	16	4	12
ADRA1A	0	0	0	0	0	0	0	0	0	0	0	0	0	0	0	0	0	0	0	0	0	0	0	0	0	0	0	0	0	2	0	0	2	2	0	0	0	0	0	0
ADRA1B	0	0	0	0	0	0	0	0	0	0	0	0	0	0	1	0	0	0	0	0	0	0	0	0	0	0	0	0	0	0	0	0	0	0	0	0	0	0	0	0
ADRA1D	2	1	2	4	3	2	1	0	2	0	0	6	0	0	2	1	8	9	7	3	10	4	1	1	2	4	1	0	10	6	1	6	5	6	3	2	1	20	4	6
ADRA2A	0	0	0	0	0	0	0	2	0	0	0	0	0	0	0	0	0	0	0	0	0	0	0	0	1	0	0	0	0	0	0	0	0	0	0	0	0	0	0	0
ADRA2B	0	0	0	0	0	0	0	0	0	0	0	0	0	0	0	0	0	0	0	0	0	0	0	0	0	0	0	0	3	0	0	0	0	0	0	0	0	0	0	0
ADRA2C	0	0	0	0	0	0	0	0	0	0	0	0	0	0	0	0	0	0	0	0	0	0	0	0	0	0	0	0	0	0	0	0	0	0	0	0	0	0	2	0
ADRB1	0	0	0	0	0	0	0	0	0	0	0	0	0	0	0	0	0	0	0	0	0	0	0	0	0	0	0	0	0	0	0	2	0	0	0	0	0	0	0	0
ADRB2	0	0	0	0	0	0	0	0	0	0	0	0	0	0	0	0	0	0	0	0	0	0	0	0	0	0	0	3	0	0	0	0	0	0	0	0	0	0	0	0
ADRB3	0	0	0	0	0	0	0	0	0	0	0	0	0	0	0	0	0	0	0	0	0	0	0	0	0	0	0	0	0	0	0	0	0	0	0	0	0	0	0	0
ADRM1	84	101	67	136	70	103	50	96	97	135	91	209	127	193	221	207	121	128	144	142	203	127	175	159	186	167	95	131	132	163	244	147	138	161	134	209	133	148	252	218
ADSL	92	95	73	108	93	100	71	54	76	101	87	128	95	102	115	164	106	190	126	140	183	80	143	104	108	160	108	98	126	193	164	127	167	186	118	197	144	121	242	110
ADSS	229	266	210	211	206	308	178	132	154	177	121	294	171	198	253	297	270	350	397	383	406	463	360	317	210	408	219	288	368	388	428	229	320	320	375	375	342	501	518	423
ADSSL1	0	0	0	0	0	0	0	0	0	1	1	1	0	0	3	0	0	0	2	0	1	0	0	0	0	1	0	0	0	0	0	0	1	0	0	1	0	1	0	2
ADTRP	0	0	0	0	1	0	0	0	0	0	0	0	0	0	0	0	0	0	0	0	0	0	0	2	0	0	0	0	0	0	0	0	0	0	0	7	0	1	1	6
AEBP1	0	0	0	0	0	0	0	0	0	0	0	0	0	0	0	0	0	0	0	0	0	0	0	0	0	0	0	0	0	0	0	0	0	0	0	0	0	0	0	1
AEBP2	8	23	31	21	16	26	10	26	26	39	25	45	22	28	27	24	33	21	64	28	54	33	34	32	23	29	16	26	41	33	24	9	26	34	27	69	37	88	59	54
AEN	2	8	4	1	0	22	4	12	3	3	0	1	0	0	0	11	23	13	31	9	11	16	27	2	0	12	6	2	10	22	4	3	6	11	0	20	19	25	25	14
AES	4	1	1	0	2	0	0	0	2	1	0	1	0	1	1	9	0	1	0	2	0	1	1	1	1	1	2	0	1	1	4	3	0	0	0	5	0	1	0	2
AFAP1	16	27	15	25	7	6	5	23	0	3	0	8	13	9	9	22	22	7	9	7	16	27	19	14	15	19	9	31	22	21	13	12	8	18	23	10	29	23	47	16
AFAP1L1	0	0	0	0	0	0	2	0	0	0	0	1	0	0	0	0	0	0	0	0	0	0	1	0	0	0	0	0	0	0	0	0	3	0	0	0	0	0	0	0
AFAP1L2	53	77	80	55	42	42	37	38	82	70	55	134	196	128	119	214	119	70	130	127	116	136	142	75	250	403	263	276	261	314	182	204	65	108	91	116	88	133	125	120
AFDN	26	18	13	16	17	25	13	20	11	15	12	15	12	13	25	26	11	11	17	26	16	31	34	37	28	37	33	40	30	12	37	36	10	26	12	23	6	20	165	44
AFF1	137	68	122	157	67	87	66	99	53	78	62	151	164	181	163	240	59	83	101	100	149	103	183	144	263	322	154	292	211	349	275	311	105	84	168	203	95	148	468	197
AFF2	0	0	0	0	0	0	0	0	1	0	0	7	0	0	0	0	0	4	0	0	0	0	0	0	0	0	0	0	1	0	0	0	4	1	0	0	0	0	0	0
AFF3	27	24	5	16	4	37	10	30	9	15	16	16	11	41	22	31	18	39	17	0	30	18	35	14	43	30	1	44	38	35	21	32	5	6	1	25	9	39	14	18
AFF4	8	5	6	8	9	0	5	1	3	4	0	4	0	5	8	5	0	3	1	18	0	10	13	2	5	2	2	2	7	2	11	3	8	1	6	13	0	0	0	3
AFG1L	7	11	10	7	4	20	4	8	6	9	4	10	9	21	9	7	8	12	6	25	17	11	16	7	7	18	22	29	32	34	8	15	7	3	0	18	18	6	8	33
AFG3L2	188	278	347	422	43	163	204	315	59	46	42	69	178	404	660	797	95	63	61	58	126	351	589	492	262	731	290	647	701	846	797	743	315	464	457	604	435	547	737	648
AFM	0	0	0	0	0	0	0	0	0	2	0	0	0	0	0	0	0	0	0	0	0	0	0	0	0	0	0	0	0	0	0	0	0	0	0	0	0	0	0	0
AFMID	0	0	0	0	0	0	0	0	0	0	1	2	0	0	0	0	0	0	0	0	0	0	0	0	1	0	0	0	1	0	0	0	0	0	0	0	0	0	0	0
AFP	0	0	0	0	0	0	0	0	0	0	0	0	0	0	0	0	0	0	0	0	0	0	0	0	0	0	0	0	0	0	0	0	0	0	0	0	0	0	0	0
AFTPH	98	148	92	110	96	127	86	70	110	110	52	197	149	154	138	275	244	217	268	185	257	217	295	144	164	445	189	188	181	224	154	147	201	145	231	253	318	271	211	231
AGA	2	4	0	3	2	2	0	13	2	0	3	0	0	0	0	15	0	11	2	11	13	16	21	4	0	0	0	0	1	0	3	0	11	6	5	1	0	10	40	4
AGAP1	7	2	0	4	0	3	1	3	0	2	1	2	1	3	6	8	1	2	4	0	10	9	0	6	1	20	6	4	8	3	3	6	3	5	7	2	5	5	8	5
AGAP2	5	0	0	0	0	2	0	0	0	0	0	0	1	0	0	1	2	2	2	1	0	1	1	2	0	0	2	0	0	1	1	0	0	0	0	2	4	0	0	0
AGAP3	10	4	9	9	0	7	1	13	0	0	1	2	13	18	27	25	0	0	3	4	18	14	28	15	13	8	6	1	5	23	11	3	14	6	13	14	19	21	38	45
AGBL1	0	0	0	0	0	0	0	0	0	0	2	0	0	3	2	13	0	0	0	0	0	0	0	0	0	0	0	0	0	0	0	0	0	0	0	0	0	0	0	0
AGBL2	432	427	376	430	391	382	303	280	426	417	248	571	492	516	384	598	289	501	605	620	734	613	612	418	1032	1376	663	954	925	897	797	688	549	470	807	757	732	841	708	721
AGBL3	0	0	0	2	1	7	0	1	0	0	2	0	0	0	0	0	0	0	0	3	5	7	2	0	0	0	0	0	0	1	0	0	0	0	1	0	0	1	0	0
AGBL4	0	0	0	0	0	0	4	0	0	0	0	1	0	1	6	1	0	0	0	0	0	0	1	0	0	0	0	4	8	0	0	0	0	0	0	11	0	0	6	0
AGBL5	2	39	23	19	30	58	37	21	42	33	14	46	32	45	19	65	64	31	84	55	95	59	66	62	55	49	30	62	76	64	35	21	86	33	68	17	80	92	85	67
AGER	0	0	0	0	0	0	0	0	0	0	0	0	0	0	0	0	0	0	0	0	0	0	0	0	0	0	0	0	0	0	0	0	0	0	0	0	0	0	0	0
AGFG1	36	36	29	37	25	37	20	49	40	50	19	17	20	44	56	63	29	42	57	48	53	64	45	85	8	81	42	41	39	19	54	51	31	28	63	45	44	58	136	56
AGFG2	55	55	47	46	50	66	26	35	32	33	15	29	61	28	57	52	27	47	88	45	114	83	50	44	83	111	54	84	66	101	43	53	33	57	43	67	27	46	66	54
AGGF1	5	57	30	37	16	8	49	28	0	0	5	11	26	44	102	71	2	2	9	12	25	34	15	53	56	134	55	26	79	90	110	112	47	78	84	66	61	86	126	96
AGK	1127	1065	853	994	911	1175	573	748	1226	1122	737	1737	1271	1616	1360	1583	1496	1577	1775	1778	2345	1896	1749	1393	1150	1690	775	1358	1421	1315	1447	968	1294	1254	1470	2046	1549	1728	1696	1571
AGL	0	1	6	7	5	0	0	2	0	0	0	4	1	7	15	9	2	1	0	7	23	16	10	4	8	21	0	3	0	10	0	11	14	15	12	7	4	8	11	3
AGMAT	252	193	193	236	253	237	102	172	200	214	154	286	375	248	299	357	371	395	396	443	489	397	532	302	342	346	285	351	350	398	468	411	252	346	393	477	404	386	511	435
AGMO	0	0	1	0	0	0	0	0	0	0	0	1	0	0	0	0	0	0	0	0	0	4	0	0	0	1	0	0	0	0	1	0	0	0	0	0	0	1	4	1
AGO1	3	19	20	23	14	11	20	23	1	24	1	20	15	10	20	21	45	13	38	20	14	27	41	43	0	80	19	18	26	38	27	28	39	17	17	64	6	46	88	37
AGO2	33	39	28	30	36	25	8	38	42	46	26	75	53	34	28	61	24	21	34	38	72	17	38	23	40	34	27	57	28	84	60	50	39	25	47	37	26	42	74	47
AGO3	14	15	12	10	13	1	14	2	7	19	0	41	1	7	2	5	11	12	46	5	29	10	22	9	12	25	0	0	28	2	3	12	18	24	5	2	33	25	17	43
AGO4	0	0	0	0	2	0	0	12	1	0	0	0	4	0	12	4	0	0	0	8	7	0	0	22	0	0	0	0	0	0	2	5	0	0	0	0	10	2	22	0
AGPAT1	37	71	64	101	68	105	55	58	62	52	33	54	90	80	77	109	76	90	59	98	162	116	127	80	68	119	69	139	32	112	63	80	93	54	133	170	112	175	134	149
AGPAT2	0	0	0	0	0	0	0	0	0	0	0	0	0	0	0	0	0	0	0	0	0	0	0	0	0	0	0	0	0	0	0	0	0	0	0	0	0	0	0	0
AGPAT3	2	9	3	5	1	3	6	7	4	2	0	2	3	5	10	6	0	0	4	0	3	1	10	5	2	9	1	16	16	12	10	10	8	10	25	21	4	12	45	27
AGPAT4	0	0	0	0	0	0	0	0	0	0	0	0	0	0	0	0	0	0	0	0	0	0	0	0	0	0	0	0	0	0	0	0	0	0	0	0	0	0	0	0
AGPAT5	7	13	13	5	2	7	2	11	2	0	7	2	4	5	19	6	4	6	1	5	0	19	13	0	14	6	9	0	0	9	14	2	9	23	9	36	1	24	60	7
AGPS	354	481	1059	1401	244	397	790	1006	155	178	152	218	354	524	1555	1654	195	200	276	269	500	506	1389	1210	476	833	393	913	947	1772	1512	1380	549	603	914	1411	1252	1487	1668	1706
AGR2	1	0	0	0	0	0	0	0	0	0	0	0	0	0	0	0	0	0	0	0	0	0	0	0	0	0	0	0	0	0	0	0	0	0	0	0	0	0	0	0
AGR3	0	0	0	0	0	0	0	0	0	0	0	0	0	0	0	0	0	0	0	0	0	0	0	0	0	0	0	0	0	0	0	0	0	0	0	0	0	0	0	0
AGRN	0	0	0	0	0	0	0	0	0	0	0	0	0	0	0	0	0	0	0	0	0	0	0	1	0	0	0	0	0	0	1	0	0	0	0	0	0	0	0	0
AGRP	0	0	0	0	0	0	0	0	0	0	0	0	0	0	0	0	0	0	0	0	0	0	0	0	0	0	0	0	0	0	0	0	0	1	0	0	0	0	1	0
AGT	0	0	0	0	0	0	0	0	1	0	0	0	0	5	3	4	0	0	0	0	0	0	0	0	0	0	0	7	0	1	5	0	0	0	0	0	0	0	0	1
AGTPBP1	19	10	12	27	12	10	21	9	3	4	9	37	37	13	19	61	11	15	11	17	12	2	0	13	55	49	34	44	6	68	46	13	25	19	46	10	11	26	59	8
AGTR1	0	0	0	0	0	0	0	0	0	0	0	0	0	0	0	0	0	0	0	0	0	0	0	0	0	0	0	0	0	0	0	0	0	0	0	0	0	0	0	0
AGTR2	0	0	0	0	0	0	0	0	0	0	0	0	0	0	0	0	0	3	0	0	0	0	0	0	0	0	0	0	0	0	0	0	0	0	0	0	0	0	0	0
AGTRAP	4	4	1	7	4	10	5	7	0	0	3	8	0	15	5	6	4	5	2	15	13	10	5	8	3	1	9	9	14	13	1	12	5	13	6	6	13	11	26	8
AGXT	0	0	0	0	0	0	0	0	0	0	0	0	0	0	0	0	0	0	0	0	0	0	0	0	0	0	0	0	0	0	0	0	0	0	0	0	0	0	0	0
AGXT2	3	2	2	6	0	6	6	2	1	4	0	1	0	0	9	0	8	12	4	5	8	2	5	2	7	0	0	0	19	0	4	0	0	3	16	17	6	6	1	7
AHCTF1	35	21	35	62	16	9	29	24	29	57	29	44	68	84	111	65	43	38	30	23	154	69	84	56	116	150	95	53	96	154	80	61	50	98	56	60	78	62	168	44
AHCY	84	90	42	115	80	89	57	60	107	74	54	111	121	67	111	108	74	100	154	172	137	138	94	84	101	201	42	67	58	73	82	59	110	72	88	173	90	103	146	136
AHCYL1	33	29	55	76	34	52	26	47	28	28	19	63	21	35	133	113	20	26	32	58	62	45	97	39	77	169	44	185	127	138	147	129	78	86	67	140	95	120	120	142
AHCYL2	481	389	309	405	508	565	253	308	375	331	216	526	257	343	438	603	630	595	684	597	591	564	537	458	498	679	328	470	521	631	567	324	429	424	501	604	558	602	700	606
AHDC1	0	0	0	0	0	0	0	0	0	0	0	0	1	0	0	0	0	0	0	0	0	0	0	0	0	0	0	1	0	0	0	0	0	0	0	0	0	0	0	0
AHI1	77	27	24	59	38	40	19	58	50	28	33	67	65	66	50	85	31	50	42	72	69	82	51	40	119	160	61	157	124	124	211	126	58	56	125	42	58	53	176	66
AHNAK	0	0	0	0	0	0	0	0	0	0	0	0	0	2	0	0	0	0	0	0	0	0	0	0	0	0	0	0	2	0	0	0	0	0	0	0	0	0	4	0
AHNAK2	0	0	0	0	0	0	0	0	0	0	0	0	0	0	0	0	0	0	0	0	0	0	0	0	0	0	0	0	0	0	1	0	0	0	0	0	0	0	0	0
AHR	158	287	157	199	180	200	119	159	183	251	125	312	294	243	330	364	300	346	383	288	422	447	323	245	358	660	343	503	456	481	386	327	575	450	390	613	480	648	419	622
AHRR	0	0	0	0	0	0	0	0	0	0	0	0	0	0	0	0	0	0	0	0	0	0	0	0	0	0	0	0	0	0	0	0	0	0	0	0	0	0	0	0
AHSA1	1136	1021	941	1106	919	968	660	897	999	1263	736	1742	1548	1311	1720	1893	1004	1216	1303	1405	1761	1467	1406	1092	1447	2661	1166	1729	1562	1931	1917	1498	1290	1286	1521	1618	1308	1526	2608	1483
AHSA2	14	37	16	16	24	20	30	18	21	26	14	35	31	17	15	9	17	20	73	30	26	29	34	47	25	31	16	27	30	44	30	14	26	20	24	28	19	24	70	32
AHSG	0	0	0	0	0	0	0	0	1	0	0	3	0	0	0	0	0	0	3	0	13	2	0	0	0	0	0	0	0	0	2	0	1	2	1	0	7	2	9	0
AHSP	0	0	0	0	0	0	0	0	0	0	0	0	0	0	0	0	0	0	0	0	0	0	0	0	0	0	0	0	1	0	0	0	0	0	0	0	0	1	0	0
AICDA	0	0	0	0	0	0	0	0	0	0	0	0	0	0	0	0	0	0	0	1	0	0	0	0	0	0	0	0	0	0	0	0	0	0	0	0	0	0	0	0
AIDA	19	20	14	24	20	32	5	13	12	14	10	23	17	28	17	30	26	28	55	24	34	38	24	14	44	76	36	35	58	37	34	22	27	33	15	40	37	29	43	51
AIF1	0	0	0	0	0	0	0	0	0	0	0	0	0	0	0	0	0	0	0	0	0	0	0	0	0	0	0	0	0	0	0	0	0	0	0	0	0	0	0	0
AIF1L	0	0	0	0	0	0	0	0	0	0	0	0	0	0	0	0	0	0	0	0	0	0	0	0	0	0	0	0	0	0	0	0	0	0	0	0	0	1	0	0
AIFM1	142	110	107	132	121	123	66	103	121	66	63	132	166	100	154	83	139	157	151	118	177	194	90	128	278	346	153	309	278	135	211	99	98	141	120	175	144	125	151	102
AIFM2	0	0	0	0	0	0	0	0	0	0	0	0	0	0	0	0	0	0	0	0	0	0	0	0	0	0	0	0	0	0	0	0	0	0	0	0	0	0	0	0
AIFM3	0	0	0	0	0	2	0	0	0	0	0	0	0	0	0	0	2	0	0	0	1	0	0	0	0	0	0	0	0	0	0	2	0	0	0	0	0	0	4	0
AIG1	0	0	0	2	0	1	0	1	0	0	0	0	0	0	0	6	0	0	0	8	0	0	0	0	0	0	0	7	0	0	0	0	7	3	0	0	0	0	0	2
AIM2	0	0	0	0	0	0	0	0	0	0	0	0	0	0	0	0	0	0	0	0	0	0	0	0	0	0	0	0	0	0	0	0	0	0	0	0	0	0	0	0
AIMP1	4	14	3	3	3	7	1	0	6	6	4	20	12	11	10	19	4	5	1	17	24	8	1	6	2	37	6	5	15	29	27	6	3	0	10	0	0	0	0	2
AIMP2	16	6	11	17	11	14	5	14	17	11	15	14	3	11	13	28	24	24	19	17	35	23	22	11	24	15	10	58	35	3	25	23	6	9	17	25	4	17	45	31
AIP	3	5	6	10	5	3	4	4	9	4	3	15	13	12	9	4	5	2	0	6	7	7	15	10	3	10	7	0	3	2	2	3	5	8	2	5	18	4	7	21
AIPL1	0	0	0	0	0	0	0	0	0	0	0	0	0	0	0	0	0	0	0	0	0	0	0	0	0	0	0	0	0	0	0	0	0	0	0	0	0	0	0	0
AIRE	0	0	0	0	0	0	0	0	0	0	0	0	0	0	0	0	0	0	0	0	0	0	0	0	0	0	0	0	0	0	0	0	0	0	0	0	0	0	0	0
AIRN	0	0	0	0	0	0	0	0	0	0	0	0	0	0	0	0	0	0	0	0	0	0	0	0	0	0	0	0	0	0	0	0	0	0	0	0	0	0	0	0
AJAP1	0	0	0	0	0	0	0	0	0	0	0	0	0	0	0	0	0	0	0	0	0	0	0	0	0	0	0	0	0	0	0	0	0	0	0	0	0	0	0	0
AJM1	0	0	0	2	0	2	0	2	2	0	0	1	0	0	0	0	0	0	0	0	0	0	0	0	0	1	0	0	0	0	0	0	1	0	0	0	1	0	0	0
AJUBA	51	77	42	71	46	65	23	31	84	115	55	173	87	138	132	147	121	89	166	121	143	122	83	131	241	349	140	256	271	251	182	174	115	71	74	136	91	106	89	88
AK1	0	0	0	0	0	0	0	0	0	1	0	3	0	2	3	0	3	1	0	4	3	0	15	2	0	3	0	0	0	3	6	0	5	0	0	2	3	4	1	0
AK2	644	551	420	567	618	608	369	493	492	522	324	768	482	656	756	632	672	802	723	861	894	723	829	671	900	1140	494	746	949	1006	975	742	588	604	541	790	677	587	944	747
AK3	71	49	35	45	82	16	39	24	7	16	24	70	45	36	39	47	25	44	58	16	31	68	44	41	15	69	68	63	44	33	42	65	70	65	44	71	62	133	99	124
AK4	657	675	485	772	545	707	446	421	325	411	250	680	783	516	620	840	604	654	747	767	851	759	840	666	732	1171	702	995	968	1172	1113	744	830	777	898	1350	1020	1138	1667	1313
AK5	0	0	0	0	0	0	0	0	0	0	0	0	0	0	0	0	0	0	0	0	0	0	0	0	0	0	0	0	0	0	0	0	0	0	0	0	0	0	0	0
AK6	1	3	1	3	10	10	2	10	15	15	5	13	12	12	6	25	8	12	10	10	18	10	17	1	12	6	8	0	8	4	22	7	6	4	0	0	0	21	24	11
AK7	0	0	0	0	0	0	1	0	0	0	0	0	0	0	0	0	0	0	0	0	0	0	0	0	0	0	0	0	2	0	0	0	0	0	0	0	0	0	0	0
AK8	0	0	0	0	3	2	1	2	0	0	0	1	4	0	0	1	0	2	0	0	2	5	0	0	0	0	0	0	0	0	0	0	3	0	3	1	2	3	3	1
AK9	1	3	1	0	1	2	2	1	1	3	0	1	2	2	1	0	1	4	7	0	4	0	0	1	1	8	1	0	6	0	1	6	11	1	4	2	3	4	13	0
AKAIN1	9	42	16	18	7	14	20	20	3	17	9	8	12	35	38	40	40	33	53	61	25	38	46	31	12	36	10	39	21	7	18	40	70	69	72	86	116	75	67	81
AKAP1	65	45	61	69	57	61	39	33	53	38	25	43	55	51	58	81	30	30	69	19	101	72	54	55	119	185	86	84	83	60	83	64	56	42	28	57	20	58	206	74
AKAP10	167	222	197	190	220	236	139	155	116	117	69	156	215	231	129	215	227	251	376	386	410	260	325	239	269	277	119	196	204	225	245	134	181	158	177	285	196	289	287	277
AKAP11	348	215	158	353	207	255	167	236	256	312	158	359	336	308	448	391	411	359	331	512	409	299	314	304	480	899	391	569	575	572	622	440	309	332	283	380	278	378	810	357
AKAP12	22	21	29	12	17	6	15	26	30	60	11	53	81	30	52	39	17	24	56	18	23	5	22	18	69	165	64	120	70	130	96	92	22	30	30	19	43	56	48	29
AKAP13	29	30	28	17	17	14	0	18	21	15	15	39	8	28	25	57	33	38	24	49	54	44	36	46	39	40	30	86	74	46	48	21	36	27	36	35	47	11	65	34
AKAP14	0	0	0	0	0	0	0	0	0	0	0	0	0	0	0	0	0	0	0	0	0	0	0	0	0	0	0	1	0	0	0	0	0	0	0	0	0	4	0	0
AKAP17A	44	19	19	72	26	30	22	58	34	28	18	26	11	28	57	101	37	27	26	39	47	20	35	55	41	102	28	54	48	57	86	70	43	44	34	62	34	37	187	69
AKAP2	1	0	5	19	0	1	4	1	19	14	0	20	0	14	0	0	0	9	6	15	9	19	21	24	0	39	7	0	28	38	32	10	7	9	0	17	18	4	0	3
AKAP3	0	0	0	0	0	0	0	0	0	0	0	0	0	0	0	0	0	0	0	0	0	0	0	0	0	0	0	0	0	0	0	0	0	0	0	0	0	0	0	0
AKAP4	0	5	4	10	1	10	16	6	0	0	0	0	0	0	0	0	5	20	32	12	24	23	6	6	0	0	0	0	0	0	0	0	20	25	0	0	0	0	17	24
AKAP5	0	2	0	0	6	0	0	0	0	0	0	0	0	0	0	0	0	1	9	4	1	0	0	0	0	0	0	0	0	0	0	0	7	0	0	0	0	4	0	0
AKAP6	82	62	42	13	52	37	24	37	43	75	34	56	18	76	64	44	83	56	54	58	178	60	71	41	140	197	73	105	136	155	94	86	43	63	69	60	23	64	95	12
AKAP7	0	6	12	11	24	1	2	6	4	20	18	15	8	10	9	3	21	27	15	17	31	32	9	15	4	20	2	4	13	8	17	12	6	4	11	25	29	34	19	11
AKAP8	85	98	75	79	64	72	76	55	143	79	50	119	114	106	131	166	141	145	140	156	155	118	163	92	149	207	131	171	145	149	100	146	108	151	150	164	142	104	138	92
AKAP8L	55	66	32	36	24	53	18	21	33	23	21	62	54	47	45	49	47	36	32	43	49	41	69	50	74	164	47	83	55	84	75	60	63	47	26	64	36	28	34	92
AKAP9	76	43	45	59	25	58	35	59	114	166	117	182	176	142	246	261	60	26	98	71	98	75	64	67	203	635	198	437	189	367	325	496	98	129	78	115	74	67	216	124
AKIP1	141	93	80	77	81	87	64	68	137	181	108	231	197	218	240	228	104	155	116	123	180	132	121	135	341	596	240	393	390	446	479	394	105	115	153	178	162	135	210	104
AKIRIN1	92	194	89	133	105	131	54	80	46	94	103	164	110	84	75	119	17	110	174	185	263	127	126	136	100	164	87	102	125	84	109	92	110	249	134	366	205	226	326	194
AKIRIN2	460	993	1093	1479	317	368	800	1028	322	338	210	508	454	837	1687	1697	319	322	402	421	603	627	1717	1479	905	1533	876	1228	1959	2688	2490	2112	576	880	1348	1726	1322	1625	1960	1754
AKNA	0	0	0	0	0	0	0	0	1	0	0	0	0	0	0	0	0	0	1	0	0	0	0	0	0	0	0	0	0	0	0	0	0	2	0	0	0	0	0	0
AKNAD1	0	0	1	3	5	3	3	0	2	1	0	10	2	0	0	0	1	0	19	1	0	0	0	0	0	5	0	0	0	3	0	1	2	5	0	1	0	3	0	2
AKR1A1	44	20	15	20	20	19	17	17	30	26	12	34	3	32	68	38	25	47	50	15	62	18	30	30	40	39	12	15	49	33	73	48	34	14	35	67	12	8	50	36
AKR1B1	907	730	620	868	766	748	456	677	936	1088	670	1589	1164	1124	1535	1317	1101	1222	1518	1430	1740	1282	1407	1170	1847	2691	1295	2102	2235	2423	2729	1790	1043	1463	1426	1771	1186	1495	2695	1854
AKR1B10	0	0	0	0	0	0	0	0	0	0	0	0	0	0	0	0	0	0	0	0	0	0	0	0	0	0	0	0	0	0	0	0	0	0	0	0	0	0	0	0
AKR1C3	0	0	0	0	0	0	0	0	0	0	0	0	0	0	0	0	0	0	0	0	0	0	0	0	0	0	0	0	0	0	0	0	0	0	0	0	0	0	0	0
AKR1C4	0	0	0	0	0	0	0	0	0	0	0	0	0	0	0	0	0	0	0	0	0	0	0	0	0	0	0	0	0	0	0	0	0	0	0	0	0	0	0	0
AKR1D1	0	0	0	0	0	0	0	0	0	0	0	0	0	0	0	0	0	0	0	0	0	0	0	0	0	3	0	0	0	0	0	0	0	0	0	0	0	0	5	0
AKR7A2	3	18	15	18	0	0	6	21	0	0	0	4	5	19	40	77	2	0	0	0	0	4	15	21	16	9	5	11	25	39	27	47	6	8	16	43	15	14	94	53
AKT1	45	26	37	45	12	35	23	33	28	30	6	21	31	23	24	31	17	23	29	20	27	13	7	37	36	104	44	35	45	71	81	45	35	41	47	31	30	40	184	80
AKT1S1	25	47	27	79	21	19	37	44	14	27	13	30	36	33	65	142	26	28	43	52	32	35	42	77	35	75	20	49	46	62	88	51	34	34	37	53	42	52	128	87
AKT2	0	0	0	0	0	0	3	0	2	0	0	0	2	1	0	7	0	0	2	0	7	4	2	3	0	13	1	0	0	1	12	0	0	3	0	0	0	0	5	0
AKT3	80	90	62	81	65	85	76	36	73	54	50	97	88	56	114	124	76	89	74	112	170	111	129	101	163	211	71	177	220	167	113	123	130	110	172	165	136	152	200	100
AKTIP	460	493	316	484	407	386	271	269	495	508	339	793	579	574	690	740	528	582	766	662	754	657	707	517	978	1223	798	1001	942	1165	1130	1049	648	686	636	899	748	889	1170	740
ALAD	49	54	42	52	47	45	18	29	25	41	16	26	26	26	33	41	37	43	60	60	85	60	56	50	19	23	32	24	26	18	35	20	71	49	91	103	76	58	94	115
ALAS1	254	268	165	195	194	237	138	165	80	96	74	117	150	141	177	142	219	279	342	300	338	305	289	217	203	193	82	152	165	167	275	139	231	327	247	275	299	209	541	262
ALAS2	0	0	0	0	0	0	0	0	0	0	0	0	0	0	0	0	0	0	0	0	0	0	0	0	0	0	0	0	0	0	0	0	0	0	0	0	0	0	0	0
ALB	0	0	0	0	0	0	0	0	0	0	0	0	0	0	0	0	0	0	0	0	0	0	0	0	0	0	0	0	0	0	0	0	0	0	0	0	0	0	0	7
ALCAM	9	2	1	1	1	17	0	0	0	4	2	1	0	0	10	9	12	7	5	18	3	4	17	12	22	7	18	0	14	15	5	11	23	2	3	5	13	0	1	5
ALDH16A1	0	0	0	0	0	0	0	0	0	0	0	0	0	0	0	1	0	0	0	2	0	0	0	0	0	1	0	0	0	0	5	0	0	11	0	0	0	1	5	0
ALDH18A1	13	17	8	35	20	28	6	8	5	24	9	19	4	8	42	42	6	28	38	48	28	23	20	15	46	80	38	74	53	30	67	81	6	25	16	7	47	14	68	15
ALDH1A1	78	34	28	59	41	43	17	16	56	49	16	40	75	26	114	75	7	18	7	0	0	4	4	9	0	35	8	0	26	14	6	0	26	39	60	13	8	31	44	42
ALDH1A2	51	20	10	32	18	40	15	21	26	48	16	45	52	85	75	41	42	78	75	66	90	67	65	78	22	19	32	31	40	66	38	17	81	122	95	128	78	104	267	130
ALDH1A3	0	0	0	2	1	4	3	0	0	0	0	0	0	0	1	0	2	0	5	5	7	11	0	2	0	0	4	0	0	11	1	0	0	0	13	2	0	0	0	9
ALDH1B1	13	24	49	28	18	1	10	18	44	24	29	71	105	28	17	66	48	65	61	44	62	81	85	6	29	26	10	0	36	13	52	47	31	38	23	96	59	46	90	72
ALDH1L1	0	0	0	0	0	0	0	0	0	0	0	0	0	0	0	0	0	0	0	0	0	0	0	0	0	0	0	0	0	0	0	0	0	0	0	0	0	0	0	0
ALDH1L2	7	7	2	7	4	3	1	2	1	17	1	43	7	25	27	32	7	0	21	8	11	27	11	7	15	7	16	36	12	24	10	25	2	9	7	11	0	5	16	11
ALDH2	91	89	44	62	29	82	68	68	1	0	24	32	52	62	73	64	0	14	74	58	98	83	71	75	73	86	52	80	105	92	98	68	98	93	91	80	124	116	138	141
ALDH3A1	0	0	0	0	0	0	0	0	0	0	0	0	0	0	0	0	0	0	0	0	0	0	0	0	0	0	0	0	0	0	0	0	0	0	0	0	0	0	0	0
ALDH3A2	27	38	32	53	39	23	28	25	49	27	17	47	63	55	49	60	46	47	58	39	66	59	50	30	91	145	76	137	143	121	65	86	45	59	21	116	50	119	37	47
ALDH3B1	0	0	0	0	0	0	0	0	0	0	0	0	0	0	0	0	0	0	0	0	0	0	0	0	4	0	0	0	2	0	0	0	0	0	2	0	0	0	0	0
ALDH4A1	44	35	25	46	41	31	21	42	32	38	18	48	57	43	42	69	44	50	89	53	72	61	68	48	127	122	73	117	105	128	77	70	53	54	61	113	65	42	108	73
ALDH5A1	7	9	3	11	5	6	14	7	16	11	5	14	13	9	6	18	9	1	16	21	12	25	13	8	0	14	6	8	4	13	11	5	1	5	25	15	3	13	22	11
ALDH6A1	1	16	17	15	20	32	14	34	3	36	5	29	69	16	9	2	23	22	19	38	26	9	13	15	41	98	15	25	38	51	59	34	10	25	1	59	33	21	13	25
ALDH7A1	162	159	100	136	134	186	97	141	171	201	126	250	245	203	276	190	197	163	209	218	202	191	213	175	322	330	160	349	294	305	486	298	171	257	202	268	231	252	320	245
ALDH8A1	17	2	3	2	12	22	0	4	3	3	0	13	0	12	0	0	2	0	19	9	0	0	27	14	0	16	18	0	2	32	18	31	22	13	14	9	10	7	7	0
ALDH9A1	9	24	12	18	17	16	16	11	22	6	9	6	16	17	30	8	13	9	11	18	26	6	12	27	71	14	14	67	13	32	23	17	0	3	15	0	15	0	8	56
ALDOA	90	100	81	146	93	197	82	88	111	117	61	140	116	102	128	132	130	180	160	153	242	182	163	173	51	152	53	106	84	80	104	45	76	123	112	136	71	63	247	149
ALDOB	0	0	0	0	0	0	0	0	0	0	0	0	0	0	0	0	0	0	0	0	0	1	0	0	0	0	0	0	0	0	0	0	0	0	0	0	0	0	7	0
ALDOC	40	30	20	38	16	15	26	18	17	31	13	21	45	37	46	63	28	37	19	15	50	87	42	42	46	58	21	20	72	59	76	45	34	17	36	63	26	31	76	26
ALG1	2	7	1	3	7	6	0	0	2	3	5	2	16	0	7	10	5	5	10	9	15	11	9	5	10	3	3	4	2	5	2	1	6	14	9	7	5	1	14	7
ALG10	2	0	4	3	0	16	0	4	8	0	0	11	9	12	0	19	7	3	16	10	13	12	7	2	0	15	6	8	7	16	4	0	4	12	0	17	12	0	11	8
ALG11	96	58	64	86	89	75	36	78	87	51	50	119	97	72	119	112	91	111	118	70	106	98	100	102	65	237	82	80	83	126	161	44	83	72	74	133	67	109	144	103
ALG12	4	7	0	7	1	1	0	1	0	3	0	2	11	6	5	0	0	1	8	0	4	0	15	2	5	0	2	0	1	0	3	1	1	3	3	3	1	6	9	9
ALG13	492	487	352	548	527	481	302	419	472	467	317	793	640	747	772	711	632	696	778	685	763	772	759	600	1291	1995	676	1163	1295	1545	1601	1124	534	602	561	856	465	562	1085	668
ALG14	124	116	104	95	96	113	59	85	107	120	90	183	128	113	179	150	154	155	165	122	181	160	117	153	109	125	120	139	155	112	161	157	140	167	221	228	161	181	349	185
ALG2	9	17	7	9	20	19	5	5	0	8	5	4	6	11	10	11	4	13	1	20	3	7	4	1	3	35	6	7	25	25	7	8	11	10	35	2	19	35	10	16
ALG3	10	14	1	2	6	12	7	12	0	4	4	15	6	9	2	8	4	16	20	7	16	3	2	8	18	0	0	0	1	8	18	28	10	6	17	4	27	8	34	20
ALG5	0	0	3	2	3	1	4	1	5	2	3	10	10	0	2	0	4	6	0	2	0	3	9	4	2	13	1	13	1	0	11	0	5	13	4	0	1	0	0	2
ALG6	523	422	377	360	383	522	219	343	374	470	285	632	529	463	677	589	446	482	425	590	619	601	624	435	652	972	478	610	843	823	1110	837	506	752	705	621	634	682	1039	981
ALG8	44	37	57	50	38	61	14	37	29	28	17	70	46	41	98	20	19	28	32	48	67	25	57	21	32	105	23	93	62	77	136	55	61	53	105	73	58	65	105	66
ALG9	5	18	27	41	26	24	14	21	2	16	21	41	33	8	25	7	22	23	68	45	49	36	55	24	37	62	39	22	37	77	21	30	11	52	6	62	42	81	49	62
ALK	0	0	1	0	4	2	1	10	1	0	0	1	0	2	5	0	0	3	2	0	0	0	3	0	1	15	4	0	0	0	9	0	2	3	6	5	2	12	4	6
ALKAL1	0	0	0	2	0	0	0	1	0	0	0	0	0	0	1	3	0	0	0	0	0	0	0	0	1	0	0	0	3	2	2	6	2	0	3	2	0	7	5	10
ALKAL2	0	0	0	0	0	0	0	0	0	0	0	0	0	0	0	0	0	0	0	0	0	0	0	0	0	0	0	0	0	0	1	0	0	0	0	0	0	0	0	0
ALKBH1	172	154	159	125	87	127	94	130	116	166	102	301	183	124	215	179	126	156	251	224	239	130	187	159	155	332	136	175	215	300	215	222	140	181	217	291	133	150	232	175
ALKBH2	84	92	83	136	115	90	66	92	73	117	62	79	54	84	104	131	92	116	91	103	179	87	106	66	83	144	73	145	104	121	172	70	102	105	117	231	159	175	142	118
ALKBH3	68	84	51	94	57	53	43	72	70	64	36	139	120	113	130	111	79	130	159	127	128	125	83	97	76	77	27	107	109	112	142	57	77	140	77	137	121	135	178	153
ALKBH4	5	1	0	0	1	0	0	0	1	0	0	0	0	0	1	0	0	0	0	2	0	0	4	0	3	3	2	0	8	0	0	0	0	0	0	0	7	5	3	0
ALKBH5	334	222	148	286	174	232	138	561	208	254	115	234	156	155	211	271	234	279	242	288	262	239	282	232	282	374	95	304	208	240	304	274	231	317	294	318	310	321	1286	461
ALKBH6	12	4	4	10	0	1	6	3	0	1	1	1	12	2	11	5	1	6	0	0	3	7	10	3	7	6	3	7	10	12	5	13	12	4	4	10	9	11	21	5
ALKBH7	41	30	28	32	28	39	33	31	32	53	21	63	54	34	64	84	27	40	51	30	55	43	41	26	57	159	71	73	84	82	90	83	37	22	71	47	51	57	82	59
ALKBH8	4	24	7	9	10	7	10	6	16	5	12	24	18	7	28	12	23	24	16	17	25	11	6	2	28	0	2	6	18	18	32	0	18	11	30	10	0	0	49	5
ALLC	11	9	6	15	2	18	7	14	3	7	6	15	11	5	26	6	15	29	20	14	18	19	20	12	34	54	11	33	32	32	38	16	20	38	33	42	14	69	31	44
ALMS1	214	195	103	230	161	237	85	121	136	124	116	179	174	118	152	182	184	163	226	189	196	164	170	154	266	617	255	199	201	229	253	203	226	233	235	324	227	259	303	251
ALOX12	17	35	15	27	7	39	10	14	3	0	7	28	24	21	24	26	8	0	36	13	18	42	26	36	46	35	12	42	13	30	31	34	19	28	27	27	25	29	26	3
ALOX12B	0	0	0	0	3	0	0	0	0	0	0	2	0	0	0	0	2	0	0	0	0	0	6	0	0	0	4	7	0	0	0	2	2	5	0	0	0	0	0	0
ALOX12E	0	0	0	0	0	0	0	0	0	0	0	0	0	0	2	0	0	0	3	0	0	0	0	0	0	17	0	0	0	0	8	0	6	7	0	0	0	0	0	0
ALOX15	0	0	0	0	7	0	0	3	0	0	0	0	0	0	0	0	0	0	0	0	6	0	0	0	0	0	0	0	0	0	0	0	0	1	0	0	0	0	0	0
ALOX15B	16	11	12	10	2	12	14	11	19	31	14	35	41	35	35	35	15	34	44	39	60	40	42	10	4	17	13	2	42	15	21	14	39	4	27	28	25	35	19	20
ALOX5	0	0	0	0	4	0	0	0	0	5	0	4	3	0	0	12	0	0	2	0	0	0	0	0	5	1	2	1	5	23	1	11	5	0	5	0	3	0	2	3
ALOX5AP	0	0	0	0	0	0	0	0	0	0	0	0	0	0	0	0	0	0	0	0	0	0	0	0	0	0	0	0	0	0	0	0	0	0	0	0	0	0	0	0
ALOXE3	8	1	1	5	0	0	0	0	6	3	0	3	6	0	1	6	0	5	6	4	2	2	0	3	11	0	3	0	9	7	3	0	3	6	10	3	4	1	14	8
ALPI	0	0	0	0	0	0	0	0	0	0	0	0	0	0	0	0	0	0	0	0	0	0	0	0	0	0	0	0	0	0	0	0	0	0	0	0	0	0	0	0
ALPK1	0	0	0	0	0	0	0	0	5	0	0	0	0	0	0	0	0	0	0	1	0	0	0	0	0	0	0	0	0	0	0	0	0	0	0	7	0	7	0	0
ALPK2	0	0	0	0	0	0	0	0	0	1	0	0	0	0	0	0	0	0	0	3	0	0	0	0	1	0	0	0	0	0	0	0	0	0	0	0	2	0	0	0
ALPK3	22	3	9	19	7	17	9	16	23	9	5	4	25	26	22	24	28	22	24	32	15	15	18	30	16	15	7	12	22	29	14	6	26	15	13	33	17	26	40	19
ALPL	0	6	7	6	3	4	1	1	1	10	8	3	17	3	3	0	9	1	27	12	13	8	12	2	10	27	3	9	8	15	1	13	6	1	10	32	7	18	15	11
ALS2	96	77	111	65	87	103	47	39	36	85	21	55	114	56	50	118	44	95	109	103	129	135	121	116	161	207	109	96	151	261	131	120	59	100	57	145	103	93	145	109
ALS2CL	0	0	0	0	0	0	0	0	0	0	0	0	0	0	0	0	0	0	0	0	0	0	0	0	0	0	0	0	0	0	0	0	0	0	0	0	0	2	0	0
ALS2CR12	0	0	0	0	0	0	0	0	0	0	0	0	0	0	0	0	0	0	0	0	0	0	0	0	0	0	0	0	0	0	0	0	0	0	0	0	0	0	0	0
ALX1	265	345	251	314	303	271	203	306	286	302	207	440	499	361	491	316	339	424	463	388	628	513	551	466	201	458	207	250	375	299	465	250	342	307	370	547	382	354	624	469
ALX3	0	0	4	1	0	2	0	0	0	0	0	0	10	0	0	2	0	0	1	0	2	0	0	0	0	0	0	0	0	0	0	0	0	1	0	0	3	0	4	5
ALX4	0	0	0	0	0	0	0	0	0	0	0	0	0	0	0	0	0	0	0	0	0	0	0	0	0	0	0	0	0	0	0	0	0	0	0	0	1	0	0	0
ALYREF	5	3	2	12	3	4	1	36	1	1	2	5	1	5	3	12	3	4	2	0	13	2	3	6	1	8	0	2	9	7	6	24	5	10	2	6	0	2	22	17
AMACR	1	0	0	0	1	0	0	1	0	2	0	2	5	4	0	1	0	0	0	0	0	0	0	0	0	0	0	0	1	4	0	0	0	0	9	4	19	0	11	0
AMBN	0	0	0	0	0	0	0	0	0	0	0	0	0	0	0	0	0	0	0	0	0	0	0	0	0	0	0	0	0	0	0	0	0	0	0	0	0	0	0	0
AMBP	0	0	0	0	0	0	0	0	0	0	0	0	0	0	0	0	0	0	0	0	0	0	0	0	1	0	0	0	0	0	0	0	0	0	0	0	0	0	0	0
AMBRA1	108	101	81	81	84	64	40	60	67	88	73	160	120	124	116	180	39	84	146	100	216	175	160	91	101	130	72	119	145	191	147	80	110	82	99	101	126	66	158	110
AMD1	1186	1012	729	1073	1014	1037	651	918	976	1117	723	1598	1451	1308	1567	1552	1356	1640	2022	1995	2114	1776	1842	1279	1437	2159	1013	1626	1794	1819	1772	1376	1149	1256	1575	1621	1372	1448	2075	1540
AMDHD1	537	421	304	492	356	395	234	279	123	183	73	166	202	132	185	165	456	584	547	674	697	605	584	453	261	333	246	292	219	268	294	298	442	528	601	786	534	803	960	693
AMDHD2	1	0	2	0	3	0	2	1	2	1	0	12	1	2	0	3	0	1	1	15	0	3	0	1	13	0	0	8	2	2	3	2	8	1	4	0	7	0	16	0
AMER1	26	2	21	21	14	5	27	5	31	12	19	20	29	36	18	27	44	37	53	54	70	23	35	24	48	63	26	39	16	42	35	16	28	41	10	63	36	58	30	35
AMER2	0	0	0	0	0	0	2	0	0	0	1	0	0	0	0	0	0	0	1	0	0	0	10	0	0	0	0	0	0	0	0	0	0	8	0	0	0	0	0	0
AMER3	0	0	0	0	0	0	0	0	0	0	0	0	0	0	0	0	0	0	0	0	0	0	0	0	0	0	0	0	0	0	0	0	0	0	0	0	0	0	0	0
AMFR	135	116	61	176	97	130	93	204	84	70	44	147	216	198	275	482	64	60	98	92	190	104	192	241	502	776	255	402	393	301	392	524	144	173	208	279	135	298	223	358
AMH	0	0	0	0	0	0	0	0	0	0	0	0	0	0	0	0	0	0	0	0	0	0	0	0	0	0	0	0	0	0	0	0	0	0	0	0	0	0	0	0
AMHR2	0	0	0	0	0	0	0	0	0	0	0	0	0	0	0	0	0	0	0	0	0	0	0	0	0	0	0	0	0	0	0	0	0	0	0	0	0	0	0	0
AMIGO1	175	113	80	117	93	126	52	112	29	48	26	91	130	150	167	118	70	89	174	122	175	154	173	180	224	280	76	175	228	207	215	156	133	127	125	216	93	178	182	217
AMIGO2	0	0	0	0	0	0	0	0	0	0	0	0	0	0	0	0	0	0	0	0	0	0	0	0	0	0	0	0	0	0	2	0	5	0	1	0	0	0	0	0
AMMECR1	4	4	0	4	4	3	7	8	15	3	1	6	17	12	4	1	19	26	13	20	11	15	25	3	0	0	5	24	23	12	8	5	16	33	34	8	0	13	4	13
AMMECR1L	36	40	20	34	40	29	25	34	18	9	10	33	55	82	52	124	58	55	71	37	72	82	50	49	97	171	67	99	109	62	64	73	55	20	48	120	82	86	38	41
AMN	0	0	0	0	0	0	0	0	0	0	0	0	0	0	0	0	0	0	0	0	0	0	0	0	0	0	0	0	0	0	0	0	0	0	0	0	0	0	0	0
AMN1	160	124	139	169	218	174	112	126	114	206	85	255	202	116	270	181	254	192	334	216	297	298	270	197	82	247	93	188	171	198	191	143	149	194	136	236	229	209	285	232
AMOT	197	149	138	169	136	190	122	92	142	126	78	255	189	215	220	350	138	169	179	188	226	177	233	174	305	452	232	321	277	305	294	211	170	182	95	246	183	197	222	128
AMOTL1	30	12	12	27	36	25	11	15	23	35	19	59	14	50	30	8	20	20	31	41	39	16	26	30	14	27	17	48	14	39	66	31	17	51	31	36	30	12	102	45
AMOTL2	0	13	0	7	8	0	2	0	6	6	5	7	5	10	2	0	10	0	9	0	0	8	0	4	0	0	0	0	13	3	6	4	9	2	2	0	6	13	5	13
AMPD1	0	0	0	0	0	0	0	0	0	0	0	0	0	0	0	0	0	0	0	0	0	0	0	0	0	0	0	0	0	0	0	0	0	2	0	0	0	0	6	1
AMPD2	33	48	33	33	54	64	25	29	22	39	11	41	16	77	14	64	26	29	31	28	81	27	41	33	124	245	69	193	118	148	105	96	31	38	23	60	20	24	23	49
AMPD3	98	134	156	148	127	145	102	121	167	188	94	248	145	133	260	307	113	170	174	213	201	186	183	182	304	588	239	600	502	639	446	382	140	99	173	196	154	171	268	180
AMPH	0	23	7	6	12	18	2	11	7	3	0	9	14	0	0	0	18	10	14	14	17	24	5	8	8	16	0	0	0	0	0	10	12	7	16	11	0	8	35	23
AMT	5	7	5	6	8	19	7	4	10	16	1	11	0	0	15	5	8	14	12	11	11	8	6	1	0	11	0	0	3	2	5	1	20	10	12	31	5	0	18	17
AMTN	0	0	0	0	0	0	0	0	0	0	0	0	0	0	0	0	0	0	0	0	0	0	0	0	0	0	0	0	0	0	0	0	0	0	0	0	0	0	0	0
AMY2B	0	0	0	0	0	0	0	0	0	0	0	0	0	0	0	0	0	0	0	0	0	0	0	0	0	0	0	0	0	0	0	0	0	0	0	0	0	0	0	0
AMZ1	0	0	0	0	0	0	0	0	0	0	0	0	0	0	0	0	0	0	0	0	0	0	0	0	0	0	0	0	0	0	0	0	0	0	0	0	0	0	0	0
AMZ2	110	123	110	152	59	127	83	103	29	27	40	93	43	85	156	130	34	20	114	86	166	141	148	124	115	222	127	134	220	208	239	197	174	150	312	179	245	239	328	204
ANAPC1	67	56	89	69	71	68	40	55	68	96	42	201	128	163	216	124	48	87	126	92	67	118	152	97	251	210	215	256	212	161	191	237	78	81	84	115	121	81	85	61
ANAPC10	137	145	113	124	104	84	78	111	133	152	77	164	100	187	167	132	165	207	204	140	262	127	243	113	116	130	83	142	140	186	200	207	112	185	223	195	209	276	296	211
ANAPC11	318	256	240	271	223	275	164	200	127	168	126	369	329	228	392	408	132	134	287	280	362	285	328	273	414	787	279	577	457	610	595	423	369	413	465	505	426	535	822	554
ANAPC13	120	69	56	110	49	59	69	41	64	66	46	110	89	98	73	69	67	93	103	93	161	77	112	79	87	144	37	139	133	128	133	82	116	103	120	176	129	144	256	150
ANAPC15	490	499	401	485	420	484	301	339	334	494	289	596	501	543	659	753	393	443	557	493	670	492	567	447	1026	1512	589	1015	982	1171	1350	903	617	738	770	907	823	799	1444	918
ANAPC16	124	120	71	70	95	93	61	55	59	67	26	61	49	126	90	94	63	107	64	138	166	125	109	123	109	82	36	69	49	106	113	62	107	157	129	220	168	128	138	171
ANAPC4	17	56	106	39	27	49	39	49	2	14	17	36	68	51	63	90	14	13	24	71	107	66	88	82	126	186	72	123	110	192	166	84	97	81	92	80	45	95	121	116
ANAPC5	26	30	12	42	25	26	22	21	34	72	40	68	35	73	45	110	27	37	41	58	39	8	37	44	72	160	119	105	84	109	93	82	60	57	43	29	47	96	87	65
ANAPC7	77	147	86	199	115	150	105	117	143	152	77	253	131	269	284	218	134	133	248	169	198	148	179	134	284	452	166	227	236	224	283	193	109	151	192	277	145	171	298	180
ANG	0	0	0	0	0	0	0	0	0	0	0	0	0	0	0	0	0	0	0	0	0	1	0	0	0	0	0	0	0	0	0	0	0	0	0	0	0	0	0	0
ANG2	0	0	0	0	0	0	0	0	0	0	0	0	0	0	0	0	0	0	0	0	0	0	0	0	0	0	0	0	0	0	0	0	0	0	0	0	0	0	0	0
ANGEL1	2	8	3	4	3	4	5	4	3	15	3	21	10	18	6	23	11	15	8	21	37	2	3	16	15	28	9	25	15	7	12	7	7	16	4	7	11	9	20	8
ANGEL2	407	416	344	495	497	450	282	333	402	375	248	575	520	490	593	748	508	651	714	502	855	589	683	486	874	1057	726	1056	797	1200	881	958	711	587	677	875	561	792	691	702
ANGPT1	0	0	4	0	2	0	0	0	0	0	0	3	5	3	2	0	3	6	1	0	2	0	4	0	0	0	1	0	1	0	0	0	10	3	0	9	0	0	20	14
ANGPT2	0	0	0	0	0	0	0	0	0	0	0	0	0	0	0	0	0	0	0	0	0	0	0	2	0	0	0	0	0	0	0	0	0	0	0	0	0	0	0	0
ANGPT4	0	1	0	0	0	0	0	0	0	0	0	0	0	0	0	0	0	0	0	0	0	0	0	0	0	0	0	0	0	0	0	0	0	0	0	0	0	0	0	0
ANGPTL1	3	0	3	7	0	0	0	3	0	0	1	0	0	0	3	0	0	0	0	0	0	0	7	2	4	1	0	0	0	9	11	0	0	0	0	0	0	0	0	10
ANGPTL2	0	0	0	0	0	0	0	0	3	0	0	0	0	0	0	0	0	0	0	0	0	1	0	0	0	0	0	0	0	0	0	0	0	0	0	4	0	0	0	0
ANGPTL3	0	0	0	0	0	0	0	0	0	0	0	0	0	0	0	0	0	0	0	0	0	0	0	0	0	0	0	0	0	0	0	0	0	0	0	0	0	0	0	0
ANGPTL4	0	0	0	0	0	0	0	2	0	0	0	0	0	0	0	0	1	0	0	0	0	0	0	0	0	8	0	0	1	0	0	0	0	0	0	0	0	0	0	0
ANGPTL5	0	0	0	0	0	0	0	0	0	0	0	0	0	0	0	0	0	0	0	0	0	0	0	0	0	0	0	0	0	0	0	0	0	0	5	0	0	0	0	2
ANGPTL6	8	1	2	4	1	5	1	0	3	1	4	13	0	3	3	5	15	2	4	8	4	6	1	1	1	13	0	11	6	1	14	3	3	3	4	2	0	6	2	1
ANGPTL7	0	0	0	0	2	1	0	0	0	0	0	0	2	0	0	0	0	0	3	1	0	0	1	0	0	3	0	0	0	0	0	0	0	0	0	0	0	0	0	0
ANGPTL8	2	4	4	2	0	3	4	2	1	0	5	2	0	0	0	2	10	4	7	10	8	1	6	2	0	2	6	0	5	0	3	1	3	4	2	14	3	1	0	1
ANHX	0	0	0	0	0	0	0	0	0	0	0	0	0	0	0	0	0	0	0	0	0	0	0	0	0	0	0	0	0	0	0	0	0	0	0	0	0	0	0	0
ANK1	0	0	0	3	0	0	1	0	2	0	0	1	0	0	0	0	0	0	0	0	0	0	0	0	0	0	0	0	0	0	1	0	0	0	0	0	0	2	5	0
ANK2	80	90	97	93	122	119	89	112	105	113	67	127	102	143	129	155	107	156	148	199	182	89	148	155	195	148	85	197	231	270	253	133	173	142	178	255	205	146	240	154
ANK3	129	139	102	112	139	125	38	99	95	84	86	160	119	81	137	133	201	118	178	190	242	211	220	135	199	296	55	214	104	141	178	148	161	161	136	186	116	173	207	175
ANKAR	0	1	0	0	0	0	0	0	0	0	0	0	0	0	0	1	0	0	0	0	0	0	0	0	0	0	0	0	0	4	0	0	0	0	0	0	0	0	15	0
ANKDD1A	0	0	0	0	0	0	0	0	0	0	0	0	0	0	0	0	0	0	0	0	0	0	0	0	0	0	0	0	0	0	0	0	0	0	0	0	0	0	0	0
ANKDD1B	0	0	0	0	1	0	0	0	0	0	0	0	0	0	0	0	0	0	0	0	0	0	0	0	0	3	0	0	0	0	0	0	0	0	0	0	0	0	1	0
ANKEF1	0	0	0	0	3	4	0	0	0	0	1	0	0	0	0	0	0	0	0	0	0	0	0	0	0	11	0	0	0	0	0	0	0	0	0	0	0	0	3	4
ANKFY1	145	207	134	160	190	229	64	122	218	258	69	345	332	298	200	290	281	326	227	267	339	354	297	169	487	738	225	362	273	430	320	236	238	190	161	246	252	258	201	222
ANKH	0	0	0	1	0	4	2	6	0	4	1	3	0	0	3	9	0	5	1	0	0	0	6	7	0	17	0	0	2	5	0	0	2	4	1	13	1	0	0	3
ANKHD1	48	31	40	38	33	15	14	25	47	60	32	103	14	93	127	82	25	63	57	104	83	109	41	25	77	191	71	65	70	178	108	69	35	44	30	60	22	68	44	56
ANKIB1	67	76	44	83	50	45	35	32	71	55	27	35	50	83	102	110	47	84	91	44	193	136	113	90	76	180	113	140	66	122	115	73	87	77	49	131	43	121	211	124
ANKK1	0	0	0	0	0	0	0	0	0	0	0	0	0	0	0	0	0	0	0	0	0	0	0	0	0	0	0	0	0	0	0	0	0	0	0	0	0	0	0	0
ANKLE1	0	0	0	0	2	0	0	0	0	1	0	0	0	0	0	0	1	0	3	1	0	2	0	0	0	4	1	0	0	0	0	0	0	1	1	0	1	0	0	0
ANKLE2	30	18	52	46	4	47	52	88	2	5	15	22	28	26	100	54	15	5	39	8	59	8	68	75	55	14	59	97	115	153	147	72	44	42	67	92	59	147	171	178
ANKMY1	0	0	0	0	0	0	0	0	0	0	0	0	0	0	0	0	0	0	0	0	0	0	0	0	0	0	0	0	0	0	0	0	0	0	0	0	0	0	0	0
ANKMY2	106	73	63	88	102	118	68	102	32	92	51	132	119	68	113	122	64	134	123	125	102	125	90	74	93	138	97	98	140	154	128	105	79	100	125	87	126	116	278	158
ANKRA2	97	75	58	84	122	70	82	67	46	91	55	92	113	75	89	60	67	83	131	89	111	73	120	64	122	193	77	103	129	150	223	83	117	152	162	163	99	160	161	78
ANKRD1	0	0	0	0	0	0	0	0	0	0	0	0	0	0	0	0	0	0	0	0	0	0	0	0	5	0	0	0	0	0	0	0	0	0	0	0	0	0	0	0
ANKRD10	7	8	7	8	3	6	5	6	0	2	3	12	3	6	9	10	2	1	10	12	21	12	14	9	7	7	0	3	16	29	9	18	12	13	11	17	7	25	22	13
ANKRD11	45	49	21	30	17	23	15	102	38	35	18	23	43	37	54	69	27	46	73	39	46	40	59	31	87	102	65	49	56	122	73	87	27	45	68	50	50	75	119	53
ANKRD12	7	34	13	30	18	16	8	9	19	5	30	19	11	12	28	39	10	10	15	35	46	15	23	37	101	43	37	98	35	82	74	43	69	72	55	114	54	103	98	110
ANKRD13A	436	430	291	458	341	410	228	512	368	454	260	516	293	507	377	765	495	425	537	439	590	417	371	458	376	909	308	417	467	690	436	625	257	213	355	385	290	345	546	498
ANKRD13B	4	0	2	3	0	0	1	2	0	0	0	0	0	4	3	14	7	3	0	0	1	1	13	2	9	1	0	0	1	4	12	5	0	5	7	1	0	0	19	2
ANKRD13C	8	26	14	24	21	23	18	11	12	28	7	32	24	16	13	10	26	6	19	15	27	22	28	12	24	48	14	27	25	38	27	23	13	14	23	39	13	24	34	16
ANKRD13D	0	0	1	5	3	0	3	1	4	6	0	2	1	2	2	7	1	3	4	6	2	4	4	0	1	0	0	0	6	5	4	3	4	6	0	2	1	5	9	7
ANKRD16	16	19	20	23	13	10	7	30	10	13	2	19	28	9	28	25	10	11	22	22	17	40	22	19	9	15	11	18	18	15	13	16	7	4	13	11	24	14	34	25
ANKRD17	4177	3819	2785	3738	3341	3882	2248	2591	3511	3901	2410	5945	5710	4944	5143	6055	4885	5308	5809	5666	6940	4969	5240	3633	6786	10759	4814	8076	6687	7430	6049	5110	3977	3435	4472	6190	5135	5342	5959	4849
ANKRD2	0	0	0	0	0	0	0	0	0	0	0	0	0	0	0	0	0	0	0	0	0	0	0	0	0	5	0	0	0	0	0	0	0	0	0	0	0	0	0	0
ANKRD22	0	0	0	0	0	0	0	0	0	0	0	0	0	0	0	0	0	0	0	0	0	0	0	0	0	0	0	0	0	0	0	0	0	0	0	0	0	0	0	0
ANKRD23	0	0	0	0	0	0	0	0	0	0	0	0	0	0	0	0	0	0	0	0	0	0	0	0	0	0	0	0	0	0	0	3	0	0	0	0	0	0	0	0
ANKRD24	0	0	0	0	0	0	0	0	0	0	0	0	0	0	0	0	0	0	0	0	1	0	0	0	0	0	0	0	0	0	0	0	0	0	0	0	0	0	0	0
ANKRD26	5	12	11	19	21	1	6	4	7	10	8	32	0	24	16	0	10	17	4	2	9	1	11	28	40	0	20	58	25	32	15	25	0	22	7	10	11	0	6	21
ANKRD27	10	12	26	17	31	23	29	20	6	33	0	29	21	24	23	23	34	21	48	38	54	31	25	8	46	111	61	47	36	41	40	29	6	5	11	50	7	26	22	20
ANKRD28	15	18	33	53	31	28	20	60	39	32	17	45	38	8	75	206	41	25	27	28	81	39	42	83	107	134	28	50	67	46	149	163	0	34	22	70	58	32	113	50
ANKRD29	0	0	0	0	0	0	0	0	3	0	0	2	0	0	0	9	0	0	0	0	0	0	0	0	0	0	0	0	0	8	4	0	0	2	0	0	0	0	0	0
ANKRD31	36	54	20	22	17	24	27	19	42	44	35	68	40	66	63	18	48	77	35	59	55	55	56	20	73	100	72	28	68	164	83	43	79	45	34	37	35	17	90	58
ANKRD33	0	0	0	0	0	0	0	0	0	0	0	0	0	0	0	0	0	0	0	0	0	0	0	0	0	0	0	0	0	0	0	0	0	0	0	0	0	0	0	0
ANKRD33B	0	0	0	0	0	0	0	0	0	0	0	0	0	0	0	0	0	0	0	0	0	0	0	0	0	0	0	0	0	0	0	0	3	0	7	0	0	0	0	0
ANKRD34A	0	11	2	5	5	1	0	4	11	0	0	4	5	12	2	1	5	7	15	12	16	4	14	8	8	15	0	6	4	1	5	7	6	13	9	1	4	6	7	13
ANKRD34B	0	5	0	0	0	0	0	0	0	0	4	0	0	0	0	9	4	0	0	11	0	0	0	0	0	0	0	0	0	0	0	5	0	0	0	0	19	0	0	0
ANKRD34C	0	0	0	0	0	0	0	0	0	0	0	0	0	0	0	0	0	0	0	0	0	0	0	0	0	0	0	0	0	0	0	0	0	0	0	0	0	0	0	0
ANKRD35	0	0	0	0	0	1	0	1	2	0	2	3	0	0	0	2	0	0	2	1	0	1	8	0	1	0	1	0	4	3	0	0	0	7	6	5	0	3	0	2
ANKRD37	0	1	1	3	3	2	0	0	3	0	0	0	0	3	2	2	0	1	1	0	18	2	0	2	5	0	2	0	0	0	1	3	0	2	4	0	6	2	12	8
ANKRD39	31	42	18	33	15	11	16	11	10	11	9	30	33	33	53	101	7	5	18	9	33	27	45	43	42	71	31	98	72	120	56	63	60	56	58	45	50	67	191	112
ANKRD40	48	88	162	146	24	24	91	109	34	23	6	13	40	54	175	264	28	49	6	35	50	55	189	174	30	229	121	141	251	320	264	271	89	102	173	207	214	122	255	196
ANKRD42	46	42	23	51	46	53	16	47	52	37	17	61	41	53	59	43	57	76	53	97	84	65	101	35	138	21	39	98	124	108	106	69	60	55	30	67	55	21	67	115
ANKRD44	98	96	105	80	112	102	67	73	74	83	86	197	52	129	131	165	193	167	237	227	286	177	135	150	140	237	146	129	227	219	195	144	138	146	159	102	170	183	208	179
ANKRD45	9	8	5	2	2	0	1	0	11	9	0	3	0	0	7	5	0	14	2	0	14	5	2	1	0	9	0	20	5	11	19	0	0	1	0	12	14	8	0	4
ANKRD46	441	396	347	404	400	378	210	293	459	511	276	618	561	542	647	704	529	546	480	449	898	720	412	375	820	1198	586	1110	865	949	890	651	580	691	675	758	641	726	879	837
ANKRD49	86	93	41	51	107	88	64	76	43	50	30	103	97	82	61	106	112	131	166	145	179	155	204	127	49	119	97	63	102	92	151	78	139	160	139	128	120	253	307	262
ANKRD50	0	0	0	4	0	0	0	6	7	0	0	1	0	5	0	18	4	3	9	0	11	0	4	3	22	99	11	0	11	0	0	0	9	0	14	0	23	0	0	0
ANKRD52	2	7	3	17	7	21	3	9	4	2	4	12	1	4	4	15	3	5	7	0	2	10	21	4	5	58	12	12	7	19	17	62	9	8	8	2	5	11	19	7
ANKRD53	5	0	0	0	1	0	0	0	0	0	0	0	0	0	1	7	0	0	0	5	6	0	0	1	0	0	0	0	0	0	0	0	0	0	0	0	0	0	0	0
ANKRD54	4	17	1	26	0	0	9	19	0	0	0	0	0	12	9	22	0	0	0	3	12	18	13	21	6	0	8	12	31	16	32	21	15	7	7	8	41	3	45	41
ANKRD55	0	0	0	0	0	0	0	0	0	0	0	0	0	0	0	0	0	0	0	0	0	0	0	0	0	1	0	0	0	0	0	0	3	0	0	0	0	0	5	0
ANKRD6	106	45	44	103	85	69	41	34	34	55	29	87	71	74	62	85	33	62	92	70	83	111	41	80	97	136	97	115	105	106	65	83	89	38	89	92	64	99	67	75
ANKRD60	0	0	0	0	0	0	0	0	0	0	0	0	0	0	0	0	0	0	0	0	0	0	0	0	0	0	0	0	0	0	0	0	0	0	0	0	0	0	0	0
ANKRD61	0	3	0	0	0	0	0	0	0	0	0	0	0	0	0	0	0	0	0	0	0	0	0	0	0	0	0	0	0	0	0	0	2	0	0	0	0	0	0	0
ANKRD63	0	5	0	0	3	0	6	1	0	0	0	0	10	0	4	0	3	0	3	0	0	0	5	2	0	0	2	0	1	0	0	0	0	3	0	12	0	0	1	0
ANKRD65	0	0	0	0	0	0	0	0	0	0	0	0	0	0	0	0	0	0	0	0	0	0	0	0	0	0	0	0	0	0	1	0	0	0	0	0	0	0	0	0
ANKRD66	0	0	0	0	0	0	0	0	0	0	0	0	0	0	0	0	0	0	0	0	0	0	2	0	0	0	0	0	0	0	0	0	0	0	0	0	0	0	0	0
ANKRD9	1	0	0	2	0	0	2	2	0	0	0	0	0	0	0	1	8	3	0	0	0	0	2	4	9	0	0	0	0	4	2	5	0	0	5	6	0	12	3	1
ANKS1A	44	55	33	59	32	70	29	58	2	9	29	78	51	78	72	87	2	9	58	53	92	48	65	71	117	94	41	128	76	93	103	41	59	53	59	55	20	47	80	66
ANKS1B	82	117	36	80	83	155	63	72	22	18	15	27	12	21	45	44	171	217	173	149	233	287	255	124	92	129	85	97	103	96	179	62	60	96	63	195	100	101	140	121
ANKS3	1	0	3	11	0	0	15	26	1	0	0	1	2	4	8	33	4	0	2	1	3	0	4	14	1	6	0	5	2	3	27	16	10	2	0	0	3	0	1	21
ANKS4B	30	33	9	18	27	29	3	13	12	0	5	1	6	4	17	0	25	7	25	0	35	5	29	7	2	19	14	15	15	12	19	4	17	21	16	23	5	45	12	31
ANKS6	5	6	9	22	4	2	4	20	14	0	1	5	0	3	0	4	0	0	0	0	0	0	8	1	1	28	0	15	17	0	5	0	9	6	0	6	17	2	74	13
ANKUB1	0	0	0	0	0	0	0	0	0	0	0	0	0	0	0	0	0	0	0	0	0	0	0	0	0	0	0	0	0	0	0	0	0	0	0	0	0	0	0	0
ANKZF1	24	55	20	53	27	32	17	17	18	15	5	29	12	31	5	23	13	54	45	23	63	14	22	25	32	39	20	35	25	27	50	25	56	45	49	19	60	65	103	34
ANLN	284	263	246	263	237	280	142	226	258	248	267	573	591	468	554	441	578	523	500	598	724	678	606	356	555	1074	412	611	594	748	566	612	496	312	565	579	435	434	595	412
ANO1	0	0	0	0	0	1	1	0	0	0	0	0	0	0	0	0	0	0	0	0	0	0	0	0	0	0	0	0	8	0	0	0	0	0	3	6	0	0	0	0
ANO10	71	54	53	68	65	59	42	34	40	46	34	94	74	59	34	63	63	49	77	85	111	120	86	48	85	189	82	108	173	113	142	55	77	134	84	69	79	106	197	136
ANO2	2	5	2	3	0	0	2	2	2	0	0	0	0	0	6	1	2	2	0	0	6	1	0	0	4	3	0	5	2	3	6	0	2	2	0	0	3	3	3	19
ANO3	0	8	19	3	3	7	0	10	0	7	0	3	2	0	0	0	8	2	6	10	3	12	1	12	0	12	0	2	0	0	15	0	6	0	1	0	0	0	0	11
ANO4	212	131	124	160	123	173	106	209	116	169	87	236	107	145	140	220	161	229	231	181	437	219	225	137	179	307	129	241	253	289	321	210	145	238	164	281	227	220	266	210
ANO5	17	32	7	15	22	10	14	22	5	13	7	7	17	6	13	4	6	11	8	26	32	21	52	31	49	92	11	27	24	41	60	28	19	16	14	13	0	10	6	36
ANO6	27	18	19	31	59	20	8	18	65	63	61	126	122	96	144	201	28	33	43	37	76	31	47	11	159	217	120	54	202	110	132	120	60	25	50	16	30	32	95	65
ANO7	0	0	0	0	0	0	0	0	0	0	0	0	0	0	0	0	0	0	0	0	0	0	0	0	0	0	0	0	0	0	0	0	0	0	0	0	0	0	0	0
ANO8	0	0	0	0	0	0	0	0	0	0	0	0	0	0	0	0	0	0	0	0	0	0	0	0	0	0	0	0	0	0	0	0	0	0	0	0	0	0	0	0
ANO9	7	2	2	3	4	0	5	7	1	8	3	10	0	1	5	8	0	0	0	0	6	0	0	0	0	9	6	0	1	0	13	9	3	6	5	22	10	7	0	3
ANOS1	0	0	0	0	0	0	0	0	0	0	0	1	0	0	0	0	0	0	0	3	0	0	1	0	10	0	0	0	2	0	0	0	1	0	0	0	0	0	7	0
ANP32A	3	17	8	10	16	8	19	16	14	8	4	11	19	9	14	13	12	8	24	20	10	16	39	5	12	9	13	20	34	31	27	27	22	13	21	44	25	20	57	34
ANP32B	362	340	253	321	255	322	178	254	189	198	143	308	297	328	298	406	273	354	377	401	469	344	383	319	420	650	334	419	452	540	559	439	500	605	769	697	582	801	1059	663
ANP32E	714	595	418	548	501	511	395	386	436	545	294	583	477	468	679	877	509	632	616	627	735	655	704	556	917	1718	631	1124	1032	1203	1271	903	685	790	918	1091	795	924	1466	919
ANPEP	0	0	0	1	0	0	0	0	5	3	0	0	2	0	2	2	0	1	0	0	0	0	0	0	0	0	0	0	4	2	0	3	0	0	0	0	0	0	0	5
ANTXR1	0	0	0	0	0	0	0	0	0	0	0	0	0	0	0	0	0	0	0	0	0	0	0	0	0	0	0	0	0	0	0	0	0	0	0	0	0	0	0	0
ANTXR2	9	1	0	3	19	20	10	3	9	29	0	30	0	37	19	16	20	8	42	47	57	0	16	15	9	8	5	14	19	6	26	30	47	52	5	69	69	100	130	78
ANTXRL	0	0	0	0	0	0	0	0	0	0	0	0	0	0	0	0	0	0	0	0	0	0	0	0	0	0	0	0	0	0	0	0	0	0	0	0	0	0	0	0
ANXA1	0	0	0	0	0	0	0	0	0	0	0	0	0	0	0	0	0	0	0	0	0	0	0	0	0	0	0	0	3	0	0	0	0	0	0	0	11	0	0	0
ANXA10	0	0	0	0	0	0	0	0	0	0	0	0	0	0	0	0	0	0	0	0	0	0	0	0	0	0	0	0	0	0	0	0	0	0	0	0	0	0	0	0
ANXA11	71	51	55	68	50	91	35	59	38	25	25	102	57	51	62	86	89	144	96	141	209	113	147	98	38	74	43	67	35	72	74	55	59	59	85	93	102	95	128	98
ANXA13	0	0	0	0	0	0	0	0	0	0	0	0	0	0	0	0	0	0	0	0	0	0	0	0	0	0	0	0	0	0	0	0	0	0	0	0	0	0	0	0
ANXA2	16	5	1	13	4	7	7	3	28	29	22	60	16	39	42	45	25	30	31	19	44	24	37	28	21	32	18	28	25	28	39	43	0	1	5	2	2	5	28	3
ANXA3	0	4	0	3	0	0	0	1	2	7	6	1	0	0	0	0	7	15	10	0	14	8	13	0	0	0	0	11	6	0	8	6	0	0	0	0	1	0	25	6
ANXA4	22	12	0	8	7	0	10	4	6	6	3	21	7	30	41	6	22	20	13	16	35	18	6	5	15	41	0	21	35	64	55	14	35	26	22	34	7	26	29	4
ANXA5	108	105	119	143	63	95	79	91	31	36	40	102	152	159	152	268	59	66	95	129	77	113	158	93	91	315	111	184	161	208	151	121	133	119	151	213	130	110	270	208
ANXA6	6	0	3	7	0	3	0	10	7	8	10	1	0	4	7	6	0	5	3	0	0	8	0	0	5	0	3	3	3	5	1	0	0	6	2	0	12	7	0	0
ANXA7	197	200	224	179	181	239	149	132	114	130	99	210	159	208	197	259	206	239	401	340	288	366	308	212	216	295	128	249	226	230	234	192	240	236	300	472	373	347	429	160
ANXA8L1	0	0	0	0	0	0	0	0	0	0	0	0	0	0	0	0	0	0	0	0	0	0	0	0	0	0	0	0	0	0	0	0	0	0	0	0	0	0	0	0
ANXA9	0	0	0	0	0	0	0	1	0	0	0	0	0	0	0	0	2	0	0	0	5	0	0	3	0	0	0	0	0	0	0	0	0	0	0	0	0	2	0	0
AOAH	0	0	0	0	3	1	4	0	0	0	1	0	0	0	2	0	0	0	0	1	2	0	0	1	0	0	0	1	2	0	0	1	2	1	1	4	5	0	4	2
AOC1	0	0	0	0	0	0	0	0	0	0	0	0	0	0	0	0	0	0	0	0	0	0	0	0	0	0	0	0	0	0	0	0	0	0	0	0	0	0	0	0
AOC2	0	12	3	7	6	0	7	4	0	6	0	3	9	6	7	8	15	4	11	15	3	7	17	8	7	0	5	8	14	0	3	4	0	0	7	4	6	6	7	1
AOC3	0	0	0	0	0	0	0	0	0	0	0	0	0	0	0	0	0	0	0	0	0	0	0	0	0	0	0	0	0	0	0	0	0	0	0	0	0	0	0	0
AOX1	0	0	0	2	0	0	0	0	0	2	0	5	0	10	5	7	3	0	0	0	0	0	0	0	0	0	0	0	1	0	3	4	6	0	0	0	0	0	8	0
AOX2	0	0	0	0	0	0	0	0	0	0	0	0	0	0	0	0	0	0	0	0	0	0	0	0	0	4	0	2	0	0	0	6	0	1	0	0	1	0	0	0
AOX4	0	0	0	0	0	0	0	0	0	0	0	0	0	0	0	0	0	0	0	0	0	0	0	0	0	0	0	0	0	0	0	0	0	0	0	0	0	0	0	0
AP1AR	178	118	56	146	116	129	83	97	39	42	49	113	177	118	119	212	160	109	207	172	266	233	291	188	194	379	173	255	187	296	223	258	160	142	266	333	222	228	278	302
AP1B1	50	59	43	87	67	88	30	60	39	65	17	76	46	84	33	79	46	87	105	145	144	94	108	77	75	145	59	125	120	117	66	76	37	62	64	131	54	83	111	114
AP1G1	17	31	40	62	51	48	40	62	17	66	20	34	74	29	43	27	57	52	76	53	34	66	66	38	115	19	36	47	101	80	77	44	75	21	48	29	23	58	133	50
AP1G2	25	66	46	29	29	28	24	44	30	40	27	25	42	20	53	47	57	53	27	51	51	52	63	32	28	43	20	17	38	57	43	38	34	33	38	86	80	64	76	55
AP1M1	43	64	31	51	45	31	41	25	30	50	30	42	33	29	24	54	52	78	197	167	110	117	146	82	26	116	35	55	73	82	68	41	100	106	91	113	84	97	201	149
AP1M2	135	169	99	128	107	136	102	102	118	160	70	194	173	141	205	217	135	154	176	185	209	181	155	141	202	301	131	215	228	269	237	224	108	198	206	279	224	249	428	273
AP1S1	21	33	44	33	26	20	24	13	33	28	30	38	24	38	26	42	35	45	38	50	54	56	56	39	39	63	40	71	61	61	78	46	26	30	41	67	49	66	87	49
AP1S2	18	12	21	54	13	11	11	106	15	0	1	5	1	0	42	134	10	15	10	4	11	18	8	78	4	25	1	29	3	14	100	128	32	4	17	0	6	7	253	199
AP1S3	0	1	0	0	0	0	0	0	0	0	3	0	0	0	0	0	0	0	0	0	3	0	0	0	0	0	0	0	0	7	3	0	0	0	0	0	0	0	0	3
AP2A1	19	6	9	15	5	2	2	10	7	13	5	17	16	4	12	30	11	17	12	8	21	14	17	6	17	26	4	24	8	30	11	9	4	3	18	14	10	5	10	3
AP2A2	33	22	40	16	29	33	29	40	27	13	4	47	27	29	66	64	23	27	64	63	79	60	85	47	68	114	65	80	48	117	74	78	26	31	66	144	41	75	91	80
AP2B1	410	257	198	271	233	220	134	210	156	160	94	263	232	250	206	232	334	335	389	298	469	425	491	305	180	195	161	240	217	368	302	203	327	234	302	315	264	256	383	352
AP2M1	407	398	275	306	265	293	183	237	391	426	246	617	441	458	526	533	413	590	621	544	762	552	569	380	778	1356	655	954	849	1198	1060	824	432	516	570	652	584	650	982	724
AP2S1	9	8	4	7	10	8	3	8	6	4	7	12	14	10	15	12	13	11	11	7	27	12	4	16	14	18	5	24	20	19	9	3	8	16	14	28	15	26	37	16
AP3B1	386	271	232	306	314	313	202	241	181	227	110	404	236	228	358	267	262	407	394	383	545	417	379	278	421	596	358	545	571	566	552	351	395	282	396	450	319	560	440	271
AP3B2	132	155	128	171	102	134	79	99	36	39	58	119	122	192	183	155	34	35	229	209	192	279	184	94	172	300	129	265	174	225	189	148	120	146	199	254	179	195	159	205
AP3D1	29	12	20	58	38	18	15	44	25	69	18	48	61	62	28	48	17	48	56	65	33	65	73	41	122	130	57	74	73	49	61	87	47	34	44	66	66	81	49	104
AP3M1	464	556	291	442	484	432	209	231	440	433	280	626	546	561	693	551	455	610	625	586	615	483	587	449	622	1194	547	788	833	940	862	672	557	724	574	1187	604	812	914	806
AP3M2	192	227	156	153	150	165	123	133	124	179	117	211	232	256	181	308	227	219	196	232	252	221	196	195	369	468	222	377	318	582	292	301	228	165	329	359	312	326	216	217
AP3S1	223	166	171	224	190	214	102	145	130	166	150	238	240	242	292	265	151	228	244	253	357	225	425	270	328	445	222	344	338	355	348	334	278	329	343	349	298	463	534	315
AP3S2	200	144	107	152	127	132	87	150	91	146	71	186	172	135	195	202	200	149	301	171	465	318	377	196	176	179	99	146	201	221	154	145	235	225	158	355	164	315	285	334
AP4B1	16	20	11	28	67	11	11	31	15	31	28	67	45	45	32	50	26	35	26	19	25	12	27	15	34	59	26	31	50	33	72	25	19	40	14	25	40	30	52	17
AP4E1	119	139	108	188	175	124	79	72	45	48	73	160	72	86	116	172	140	69	81	145	168	89	127	137	159	381	149	246	169	249	190	188	108	159	185	121	123	201	299	170
AP4M1	10	5	5	6	1	4	1	6	5	16	1	16	10	2	4	12	4	10	5	9	19	3	19	4	11	0	2	5	10	20	3	5	10	0	6	8	1	0	0	0
AP4S1	2	0	1	2	0	0	1	2	0	0	0	2	0	0	0	3	0	0	0	0	0	0	0	0	0	0	0	0	0	5	0	0	0	0	16	0	6	0	3	0
AP5B1	0	4	0	0	0	0	0	0	0	0	0	1	0	0	0	0	0	0	0	0	0	0	0	0	0	0	0	0	0	0	0	1	0	0	1	0	0	0	0	0
AP5M1	116	78	60	109	87	146	76	72	51	121	28	100	105	98	120	168	70	149	108	95	167	178	114	101	114	69	87	75	132	156	148	74	78	158	109	50	54	139	230	160
AP5S1	17	4	4	11	12	22	6	5	17	8	13	42	5	17	34	32	29	15	40	23	18	27	14	15	35	30	14	3	44	16	16	14	24	16	16	42	23	7	38	19
AP5Z1	0	0	0	0	0	2	0	0	0	0	0	1	7	0	0	0	0	0	0	10	3	0	0	0	0	0	0	0	0	0	0	2	3	3	1	2	0	1	0	0
APAF1	124	180	135	92	112	157	90	114	242	257	197	390	362	378	444	310	194	216	173	164	265	225	172	114	713	1008	494	795	592	585	565	503	202	215	289	231	206	241	364	157
APBA1	21	9	42	63	17	16	15	75	9	26	6	34	22	22	54	100	21	36	48	27	40	28	30	94	30	69	12	30	57	37	59	107	42	48	47	105	30	23	148	91
APBA2	0	0	0	0	0	0	0	0	3	0	0	0	0	0	0	0	0	0	0	0	8	0	0	0	0	0	0	0	0	0	0	0	0	0	0	0	0	0	0	0
APBA3	20	5	2	11	6	6	9	15	16	8	13	24	5	29	32	18	14	28	8	31	17	25	17	14	7	48	10	13	14	11	15	7	13	17	16	27	21	16	62	20
APBB1	0	0	0	1	0	0	0	0	0	0	0	1	0	0	0	6	0	0	0	0	11	0	0	0	0	0	7	12	0	0	5	0	1	3	0	0	0	16	6	1
APBB1IP	7	8	9	20	2	6	1	2	3	1	3	6	0	9	21	12	0	3	0	2	10	7	8	9	4	16	4	1	16	9	25	24	8	17	27	47	26	25	37	45
APBB2	366	391	288	337	290	305	188	224	343	345	166	486	515	354	427	508	536	544	614	595	701	536	581	397	529	890	441	684	463	568	620	450	476	374	458	664	463	478	631	597
APBB3	0	1	0	0	0	0	0	0	0	0	1	0	0	0	0	0	0	7	0	8	2	0	0	0	0	0	5	0	3	0	0	0	0	2	0	0	0	0	0	6
APC	18	24	17	20	18	19	13	15	22	21	6	46	17	8	39	29	7	6	31	17	37	26	33	45	71	122	109	91	93	119	128	102	51	47	81	47	42	118	25	81
APC2	0	8	1	4	7	3	1	0	11	3	6	6	1	4	10	9	0	2	8	9	11	5	11	1	0	0	0	5	15	7	6	1	3	0	0	19	1	7	3	13
APCDD1	0	0	1	0	0	0	0	0	0	0	0	0	0	0	0	9	0	0	0	0	0	0	0	0	2	0	0	0	0	0	0	0	0	0	0	0	0	0	0	0
APCDD1L	0	4	0	2	2	0	0	0	0	0	0	0	1	2	3	0	0	11	4	0	0	0	0	0	0	0	0	0	0	0	6	0	0	2	0	0	7	0	0	2
APCS	0	0	0	0	0	0	0	0	0	0	0	0	0	0	0	0	0	0	0	0	0	0	0	0	0	0	0	0	0	0	0	0	0	0	0	0	0	0	0	0
APEG3	0	0	0	0	0	0	0	0	0	0	0	0	0	1	0	0	0	0	0	1	0	0	0	0	0	0	0	0	0	0	0	0	0	0	0	0	0	0	0	0
APEH	12	36	13	13	18	31	13	18	35	27	6	43	32	17	28	26	5	17	59	24	50	45	15	6	34	92	33	54	38	42	38	75	8	42	22	47	22	22	80	18
APELA	0	0	0	0	0	0	0	0	0	0	0	0	0	0	0	0	0	0	0	0	0	0	0	0	0	0	0	0	0	0	0	0	0	0	0	0	0	0	0	0
APEX1	79	47	54	90	86	93	61	49	75	66	61	112	133	71	192	119	98	105	129	94	156	121	98	65	93	77	37	71	75	107	89	68	87	88	115	115	75	68	198	154
APEX2	42	48	103	36	58	96	60	47	4	15	7	32	6	14	33	45	15	23	46	48	47	55	20	18	70	169	18	32	43	73	42	49	41	68	32	72	28	24	60	57
APH1A	1	6	2	1	3	0	1	2	3	0	1	1	2	1	1	3	0	6	5	7	4	6	8	11	7	4	0	8	3	10	8	3	5	5	0	4	8	6	22	17
APH1B	246	243	144	218	168	202	109	196	155	250	133	320	263	336	391	344	257	202	352	306	313	259	261	210	627	1014	420	526	595	669	711	582	341	383	587	616	432	521	497	553
API5	821	788	639	782	705	784	443	541	754	821	572	1257	953	1067	1072	1289	950	908	905	859	1109	988	906	838	1968	2691	1211	1734	1757	1940	1791	1403	834	906	1005	1240	915	992	1441	1006
APIP	130	148	144	118	97	154	92	100	175	209	113	270	197	303	284	270	110	132	176	174	183	141	131	127	434	612	286	387	410	458	540	381	136	174	130	224	171	230	328	159
APLF	101	42	46	83	40	44	31	73	121	58	48	159	108	93	103	88	50	93	115	43	78	58	91	82	98	208	61	75	128	133	184	121	73	126	45	49	59	53	140	143
APLN	0	0	0	0	12	0	0	0	0	0	0	0	0	0	0	3	0	0	0	0	0	10	3	4	0	0	0	0	0	0	0	0	0	0	0	10	0	4	0	0
APLNR	0	0	0	0	0	0	0	0	0	0	0	0	0	0	0	0	0	0	0	0	0	0	0	0	0	0	0	0	0	0	0	0	0	0	0	0	0	0	0	0
APLP1	20	13	21	18	14	14	8	24	5	3	13	18	22	15	20	35	3	4	20	0	44	24	20	12	8	40	14	36	21	59	20	25	29	39	61	68	74	34	27	56
APLP2	155	167	109	189	149	177	120	215	160	112	71	175	254	343	201	240	182	212	219	228	247	238	286	144	351	486	242	403	324	260	282	133	310	222	274	424	238	371	425	389
APMAP	14	15	14	6	11	19	3	12	14	2	6	6	12	2	5	10	13	20	18	18	29	4	7	11	6	5	2	11	9	2	8	8	18	15	21	20	18	13	20	42
APOA1	0	0	0	0	0	0	0	0	0	0	0	0	0	0	0	0	0	0	0	0	0	0	0	0	0	0	0	0	0	0	0	0	0	0	0	0	0	0	0	0
APOA2	0	0	0	0	0	0	1	0	0	0	0	0	0	0	0	0	0	0	0	0	0	0	0	0	0	0	0	0	0	0	1	0	0	0	0	0	0	0	0	0
APOA4	0	0	0	0	0	0	0	0	0	0	0	0	0	0	0	0	0	0	0	0	0	0	0	0	0	0	0	0	0	0	0	0	0	0	0	1	0	0	1	0
APOA5	0	0	0	0	0	1	0	0	0	0	0	0	0	1	0	0	0	0	0	0	1	0	3	0	0	0	0	0	0	0	0	0	0	0	0	0	0	0	0	0
APOB	39	45	20	13	10	28	24	1	2	27	17	14	0	18	0	18	64	50	14	14	31	6	66	6	0	76	43	28	23	26	31	21	15	59	27	23	7	54	42	44
APOBEC1	0	0	0	0	1	0	0	3	0	0	0	0	0	0	0	0	0	0	0	0	0	0	0	0	0	0	0	0	0	0	0	0	0	0	0	0	0	0	0	0
APOBEC2	4	15	1	10	9	3	5	2	6	9	9	10	22	14	17	16	14	16	19	14	42	28	16	4	12	10	10	13	4	3	14	8	14	11	18	5	22	21	26	12
APOBEC3H	0	2	0	0	0	0	0	0	0	0	3	0	4	0	0	0	0	0	0	0	0	0	0	2	0	0	3	0	9	2	0	17	0	0	0	0	0	0	0	0
APOBEC3Z1	0	0	0	0	0	0	0	0	0	0	0	0	0	0	0	0	0	0	0	0	0	0	0	0	0	0	0	0	0	0	0	0	0	0	0	0	0	0	0	0
APOBEC3Z2	0	0	0	0	0	0	0	0	0	0	0	0	0	0	0	0	0	0	0	0	0	0	0	0	0	0	0	0	0	0	0	0	0	0	0	0	0	0	0	0
APOBEC4	0	0	0	0	0	0	1	0	0	0	0	0	0	0	0	0	0	0	0	0	0	0	0	0	0	0	0	0	0	0	0	0	0	0	0	0	3	0	0	0
APOBR	2	0	0	0	0	4	0	1	0	2	0	2	0	0	0	0	0	0	0	0	0	0	0	0	0	0	0	5	2	0	5	0	2	2	0	0	0	0	0	0
APOC2	0	0	0	0	0	0	0	0	0	0	0	0	0	0	0	0	0	0	0	0	0	0	0	0	0	0	0	0	0	0	0	0	0	0	0	0	0	0	0	0
APOC3	0	0	0	0	0	0	0	0	0	0	0	0	0	0	0	0	0	0	0	0	0	0	0	0	0	0	0	1	0	0	0	0	0	0	0	0	0	0	0	0
APOC4	0	0	0	0	0	0	0	0	0	0	0	0	0	0	0	0	0	0	0	0	0	0	0	0	0	0	0	0	0	0	0	0	0	0	0	0	0	0	0	0
APOD	5	0	1	5	2	0	2	0	12	0	0	0	8	4	13	10	5	6	5	4	0	9	0	0	1	2	4	5	0	9	2	1	6	8	16	19	13	16	3	13
APOE	0	0	0	0	0	0	0	0	0	0	0	0	0	0	2	0	0	0	0	0	0	0	0	0	0	0	0	0	0	0	0	0	3	0	0	0	0	0	0	0
APOF	0	0	0	0	0	0	0	0	0	0	0	0	0	0	0	0	0	0	0	0	0	0	0	0	0	0	0	0	0	0	0	0	0	0	0	0	0	0	0	0
APOH	0	0	0	0	0	1	0	0	0	0	0	0	0	0	0	0	0	0	0	0	0	3	0	0	0	0	0	0	0	0	1	0	0	0	0	0	0	0	0	0
APOL3	0	0	0	0	0	0	0	0	0	0	0	0	0	0	0	0	0	9	0	0	3	0	0	2	0	0	2	0	0	0	0	0	0	0	0	0	0	0	0	0
APOLD1	2	13	1	11	0	0	0	1	0	0	0	0	0	0	0	0	1	0	2	6	0	0	15	0	0	0	0	0	26	0	0	0	2	1	41	18	0	35	18	20
APOM	0	0	0	1	0	0	0	2	1	0	0	0	0	0	2	0	0	2	0	1	0	1	0	2	0	0	0	0	1	0	0	0	0	0	0	3	0	0	0	0
APOO	146	137	87	103	94	102	60	86	78	89	79	157	80	132	170	131	125	125	118	171	245	120	146	112	87	106	63	107	121	80	162	112	135	189	153	188	163	207	339	231
APOOL	0	0	0	0	0	0	0	0	0	0	0	0	0	0	0	0	0	0	0	0	0	0	0	0	0	3	0	0	0	0	0	0	0	0	0	0	0	0	0	0
APOPT1	18	16	22	31	18	28	14	29	5	11	13	29	23	24	30	28	5	4	32	27	24	32	24	10	6	19	16	17	36	44	25	14	23	10	30	26	41	16	33	35
APP	8	16	9	27	13	26	9	19	8	2	6	3	10	2	2	5	22	21	52	10	10	22	18	35	11	19	0	21	3	4	18	12	31	26	46	38	18	19	62	43
APPBP2	95	66	40	75	16	66	52	48	12	2	9	21	91	127	73	110	33	12	10	7	83	103	91	80	123	103	40	134	175	224	132	95	72	81	89	135	110	150	182	123
APPL1	122	174	179	133	104	140	63	96	100	77	70	124	167	123	200	237	172	260	242	237	299	284	221	162	219	284	206	294	143	175	228	155	173	196	260	193	293	283	243	306
APPL2	178	243	163	192	81	239	121	161	24	15	89	252	155	208	216	304	28	16	169	189	245	269	226	169	298	683	240	394	342	499	359	267	211	136	227	250	256	258	220	371
APRT	0	0	0	1	0	0	0	0	0	0	0	0	0	0	0	0	1	3	0	0	0	0	1	0	0	0	0	0	0	0	0	0	0	0	0	0	0	0	0	0
APTX	17	10	28	16	11	24	5	8	22	14	23	26	34	29	28	30	21	21	18	45	10	17	23	27	52	44	43	16	26	44	44	24	26	25	28	52	26	22	28	29
AQP1	0	0	0	0	0	0	0	0	0	0	0	0	0	0	0	0	0	0	0	0	0	0	0	0	0	0	0	0	0	0	0	0	0	0	0	0	0	0	0	0
AQP10	0	0	0	0	0	0	0	0	0	0	0	0	0	0	0	0	0	1	0	2	0	0	0	0	0	0	0	0	0	0	0	0	0	0	0	0	0	0	0	0
AQP11	13	23	17	18	18	33	5	0	14	12	0	4	5	4	10	24	28	2	88	12	39	38	28	23	24	0	0	0	23	15	19	13	30	42	42	49	42	24	54	14
AQP12B	0	0	0	0	0	0	0	0	0	0	0	0	0	0	0	0	0	0	0	0	0	0	0	0	0	0	0	0	0	0	0	0	0	0	0	0	0	0	0	0
AQP2	0	0	0	0	0	0	0	0	0	0	0	0	0	0	0	0	0	0	0	0	0	0	0	0	0	0	0	0	0	0	0	0	0	0	0	0	0	0	0	0
AQP3	0	8	4	19	2	6	1	5	7	10	0	3	0	0	6	10	17	17	30	2	4	5	22	2	12	29	3	37	15	25	10	13	12	6	16	23	18	13	29	13
AQP4	7	0	0	0	4	10	0	0	4	12	0	5	6	2	0	26	13	0	3	7	23	0	7	4	31	14	14	36	2	5	10	13	0	7	6	0	0	0	10	0
AQP5	0	0	0	0	0	0	0	0	0	0	0	0	0	0	0	0	0	0	0	0	0	0	0	0	0	0	0	0	0	0	0	5	0	0	0	0	0	0	0	0
AQP6	27	11	13	5	13	13	10	10	9	11	13	15	20	15	13	21	10	30	49	16	20	11	13	11	35	22	9	8	16	28	11	10	24	15	22	14	35	21	29	24
AQP7	0	0	0	0	0	0	0	0	0	0	0	0	0	0	0	0	0	0	0	0	0	0	0	0	0	0	0	0	0	0	0	6	0	0	0	0	0	0	4	0
AQP8	0	0	0	0	0	0	0	0	0	0	0	0	0	0	0	0	0	0	0	0	0	0	0	0	0	0	0	2	0	0	0	1	0	0	0	0	0	0	0	0
AQP9	0	0	0	0	0	0	0	0	0	0	0	0	0	0	0	0	0	0	0	0	0	0	0	1	0	0	0	0	0	1	0	1	0	0	0	0	0	0	0	0
AQR	44	3	37	41	63	65	25	25	34	42	25	30	48	39	48	77	56	105	33	26	52	19	53	98	65	107	44	103	71	30	163	56	11	57	23	16	14	13	110	126
AR	0	0	0	0	0	0	0	0	0	0	0	0	0	0	0	0	0	0	0	0	0	0	0	0	0	0	0	0	0	0	0	0	0	0	0	0	0	0	0	0
ARAF	27	27	9	17	29	24	17	26	24	41	5	29	32	25	58	48	24	15	5	14	52	55	30	26	32	45	22	66	31	23	33	57	26	13	0	27	56	39	13	41
ARAP1	4	1	1	13	0	3	1	0	0	0	4	2	7	0	6	12	9	0	5	0	0	0	2	11	11	37	15	0	7	0	0	7	0	2	2	2	10	3	8	5
ARAP2	122	211	115	173	88	243	118	153	86	124	74	199	128	166	205	290	113	150	217	161	293	185	309	209	240	400	103	418	294	260	330	264	303	275	381	274	266	276	486	312
ARAP3	30	27	37	58	29	38	34	30	21	38	26	42	30	30	47	72	37	69	66	75	88	59	81	47	25	74	31	57	47	69	43	29	49	37	56	26	27	45	33	60
ARC	0	0	0	0	0	3	0	0	0	0	0	0	4	0	0	0	0	0	0	0	0	1	0	0	9	1	3	0	0	0	1	1	0	0	0	0	0	8	1	1
ARCN1	265	365	264	273	310	290	189	259	398	453	243	671	443	480	574	559	352	329	324	265	472	385	298	166	828	1288	625	967	1025	1143	1051	678	508	445	501	575	567	570	701	563
AREG	0	0	0	0	0	0	0	0	0	0	0	0	0	0	0	0	0	0	0	0	0	0	0	0	0	0	0	0	0	5	0	0	0	0	0	0	0	0	0	0
AREL1	49	72	43	46	36	54	35	25	30	40	14	70	55	59	51	51	68	52	55	68	65	70	58	56	61	118	72	87	69	43	96	66	45	53	81	101	43	75	99	64
ARF1	1186	1180	807	1089	831	1185	640	839	1251	1573	847	2094	1914	1781	1798	2080	1367	1601	1901	1742	2018	1782	1825	1392	2113	3298	1672	2862	2325	2792	2553	2069	1578	1643	1873	2297	1822	2133	2693	2036
ARF2	80	77	48	60	72	68	42	30	33	52	27	49	142	62	76	38	74	72	86	98	156	121	73	75	141	250	121	81	72	72	109	93	92	75	80	158	117	129	159	147
ARF3	210	254	138	214	179	198	98	129	167	170	78	259	258	256	235	291	252	247	304	281	332	301	355	173	303	463	228	384	333	434	229	201	202	171	262	291	232	274	258	278
ARF4	1454	1559	1298	1715	1312	1780	1114	1222	2437	2584	1493	3502	3015	2856	3550	3689	1498	1642	1832	1900	2112	1359	1878	1510	4943	8169	3715	5755	5414	6362	7054	4648	1625	2047	1846	2162	1656	2055	2710	2100
ARF5	281	341	247	297	133	277	182	247	51	65	163	235	306	429	365	529	30	36	224	231	517	364	425	303	707	1159	514	967	802	1006	873	670	405	481	458	655	546	565	965	589
ARF6	61	85	117	593	33	78	198	458	24	29	31	22	48	50	577	704	36	49	57	55	106	80	234	588	84	229	56	65	90	257	712	599	81	76	59	197	92	138	642	629
ARFGAP1	66	52	43	53	66	53	30	41	17	17	23	81	66	95	94	135	6	34	105	95	108	85	134	72	82	78	24	40	56	37	51	47	52	71	64	98	63	69	114	111
ARFGAP2	76	63	83	79	96	45	60	76	62	96	38	93	110	121	141	128	117	162	171	139	214	207	163	111	81	181	77	179	75	79	88	77	96	102	112	204	123	92	216	142
ARFGAP3	13	0	1	6	11	17	1	1	0	18	11	20	17	23	22	11	3	9	23	6	0	6	11	0	3	13	7	40	8	5	19	0	37	13	0	18	35	21	0	33
ARFGEF1	58	63	65	95	35	53	27	72	48	33	22	33	58	24	50	100	63	70	92	64	67	63	75	59	127	223	50	156	98	123	156	80	57	66	36	44	28	73	235	76
ARFGEF2	90	128	83	147	75	95	91	123	104	74	65	150	66	113	205	336	108	120	96	121	126	143	170	141	159	350	116	220	237	377	186	154	94	147	138	401	194	218	347	162
ARFGEF3	55	85	77	103	13	39	70	75	8	5	15	40	78	86	133	117	18	19	25	35	37	67	98	82	60	185	87	140	151	186	145	181	60	70	90	121	116	133	160	161
ARFIP1	432	360	279	333	424	458	348	271	318	333	257	456	487	450	520	397	310	468	478	397	430	396	545	374	656	978	456	770	853	858	834	820	460	626	584	746	418	647	1028	637
ARFIP2	38	33	30	19	14	23	17	22	13	26	28	47	40	33	12	19	14	29	28	72	37	50	33	14	43	47	3	93	61	57	61	59	14	25	20	14	17	10	88	39
ARFRP1	9	4	1	18	8	2	2	6	0	1	0	4	7	7	4	1	1	10	1	2	1	4	2	12	7	10	2	10	8	6	5	6	13	8	14	16	25	16	23	14
ARG1	0	0	0	0	0	0	0	0	0	0	0	0	0	0	0	0	0	0	0	0	0	0	0	0	0	0	0	0	0	0	0	0	0	0	0	0	0	0	0	0
ARG2	126	110	68	104	101	172	73	116	96	81	56	176	107	112	202	110	148	169	240	192	241	224	135	74	250	262	135	231	261	261	305	144	206	226	154	258	235	155	306	218
ARGFX	0	0	0	0	0	0	0	0	0	0	0	0	0	0	0	0	0	0	0	0	0	0	0	0	0	0	0	0	2	0	0	0	0	0	0	0	0	0	0	0
ARGLU1	91	73	80	127	82	62	59	69	37	67	57	161	118	141	147	268	21	50	178	161	219	135	163	133	182	293	135	220	200	222	251	162	134	140	177	222	146	178	256	155
ARHGAP1	6	5	6	11	7	2	2	4	3	2	2	6	5	5	4	3	6	5	8	10	7	13	3	4	14	7	9	5	2	4	17	7	3	6	7	22	6	4	14	14
ARHGAP10	69	114	83	140	22	89	80	106	25	31	19	31	94	171	159	184	44	26	73	53	111	128	147	167	199	246	136	210	225	244	239	137	93	111	202	227	138	190	266	199
ARHGAP11A	267	242	164	260	168	239	107	211	208	343	171	357	248	358	265	376	374	327	273	243	351	319	309	242	491	839	328	524	391	394	429	250	182	215	242	316	289	293	332	152
ARHGAP12	604	674	377	699	195	559	388	435	123	135	138	217	591	664	644	768	118	160	267	238	713	776	776	666	810	1345	684	1101	839	1011	944	763	593	609	859	1087	726	1033	1035	902
ARHGAP15	0	0	0	0	0	0	0	0	0	0	0	0	0	0	0	0	0	0	0	0	0	0	0	4	0	0	0	0	0	0	0	0	0	0	0	0	0	0	0	0
ARHGAP17	34	41	26	47	19	36	32	40	3	3	3	22	32	48	87	81	1	7	29	8	24	54	67	38	44	98	38	132	112	137	117	91	34	41	36	65	44	32	41	82
ARHGAP18	370	265	366	428	257	397	223	227	356	499	217	580	354	481	562	563	337	407	540	446	563	502	368	319	871	1191	497	814	781	945	1003	711	289	413	470	363	376	543	588	412
ARHGAP19	90	103	121	113	111	81	66	67	144	95	71	203	176	181	144	203	91	124	140	179	173	141	140	101	157	235	155	184	281	120	215	165	85	87	145	303	105	133	109	166
ARHGAP20	13	6	6	7	0	3	2	9	0	0	1	16	1	5	0	23	0	9	0	18	20	5	11	32	0	20	0	0	12	11	11	0	18	10	0	5	2	12	45	34
ARHGAP21	49	24	21	49	11	37	10	41	9	10	3	16	26	3	83	17	31	8	38	6	52	40	61	30	2	72	20	20	12	43	29	32	7	28	27	46	73	34	69	26
ARHGAP22	100	41	41	71	40	50	21	47	49	48	20	47	85	38	87	83	90	79	58	81	108	97	86	96	37	70	23	47	34	49	84	21	77	77	93	116	49	145	133	123
ARHGAP23	0	2	0	0	0	6	1	1	0	0	0	0	0	0	0	0	1	0	0	0	0	0	0	0	0	0	1	0	2	0	0	0	0	0	0	0	0	0	0	0
ARHGAP24	30	9	14	34	20	34	21	9	36	35	7	23	35	59	30	31	35	43	37	46	24	16	11	20	36	28	2	44	81	29	56	25	19	18	71	102	55	99	47	46
ARHGAP25	1064	1089	953	968	929	1134	609	785	732	818	482	1094	1025	990	1114	1113	1325	1451	1684	1489	2106	1472	1599	1175	1089	1767	841	1065	1445	1383	1387	675	964	1086	1109	1891	1312	1173	1971	1367
ARHGAP26	38	20	39	72	10	29	38	50	18	23	19	27	14	10	100	95	1	26	21	22	3	15	56	71	21	3	6	63	56	119	131	60	7	0	8	46	27	44	62	132
ARHGAP27	5	0	12	4	6	1	9	1	7	3	2	12	14	3	1	20	3	12	4	0	46	2	1	6	0	21	2	2	3	6	16	15	15	5	13	11	10	19	17	5
ARHGAP28	0	0	0	0	1	0	0	0	0	0	0	8	0	0	0	0	0	0	0	0	0	0	0	0	0	0	1	0	3	0	0	13	0	0	0	0	0	0	0	8
ARHGAP29	433	343	365	551	182	255	322	518	144	148	107	240	271	431	1173	1186	150	188	284	218	251	355	699	577	424	807	572	700	864	1200	1350	1197	395	614	637	949	661	683	1546	1054
ARHGAP30	1	0	0	2	0	0	0	0	0	0	0	0	0	0	0	0	0	0	0	0	0	0	0	0	0	0	0	0	0	0	0	0	0	0	0	0	0	0	0	0
ARHGAP31	0	0	19	6	1	0	4	0	2	0	5	0	4	3	0	0	2	1	5	31	21	23	0	8	0	33	0	1	22	14	1	5	6	7	15	12	24	0	1	1
ARHGAP32	30	53	24	58	40	21	26	31	19	35	31	19	20	79	56	73	45	30	29	31	141	30	36	46	54	97	60	64	72	111	49	82	31	50	40	89	52	85	69	47
ARHGAP33	0	0	0	0	0	0	1	0	0	0	1	0	11	1	0	0	0	1	0	0	0	0	0	0	0	0	0	5	0	0	1	0	0	0	0	0	0	0	0	1
ARHGAP35	59	89	54	118	62	36	66	72	63	80	39	59	52	67	143	139	81	75	54	69	75	102	68	54	112	134	103	126	207	271	210	196	88	66	129	240	106	179	152	145
ARHGAP36	0	0	0	0	0	0	0	0	0	0	0	0	0	0	0	0	0	0	0	0	0	0	0	0	0	0	0	1	0	0	1	6	0	0	0	0	0	0	0	0
ARHGAP39	2	1	0	6	1	4	1	7	3	1	0	0	9	3	0	0	0	1	2	5	0	2	1	1	2	3	0	0	1	6	1	3	5	3	1	0	1	2	1	5
ARHGAP4	0	0	7	3	4	8	3	1	0	5	0	5	0	2	2	5	12	14	2	0	0	5	22	2	21	28	9	19	4	1	0	4	0	4	13	0	0	0	6	0
ARHGAP40	0	0	0	0	0	0	0	0	0	0	0	0	0	0	0	0	0	0	0	0	0	0	0	0	0	0	0	0	0	0	0	0	0	0	0	0	0	0	0	0
ARHGAP42	80	87	60	66	50	89	57	97	124	174	107	296	174	274	228	324	132	152	166	249	192	168	134	143	162	239	55	113	128	141	134	166	185	190	112	267	152	210	312	175
ARHGAP44	20	8	8	19	1	7	3	7	8	8	11	14	9	10	7	11	6	9	8	14	11	6	14	12	9	38	6	13	13	25	22	11	3	3	13	12	14	1	51	19
ARHGAP45	0	0	0	0	0	0	0	0	0	0	0	0	0	0	0	0	0	1	0	0	1	0	0	0	0	0	0	0	0	0	0	0	0	0	0	0	0	0	0	0
ARHGAP5	299	255	173	212	134	129	107	136	127	164	83	295	294	113	233	292	184	187	205	286	392	183	220	302	409	502	253	385	463	369	439	504	278	408	336	571	324	380	601	450
ARHGAP6	0	0	0	0	0	0	0	0	0	0	0	0	0	0	0	0	0	0	0	0	0	0	0	0	0	0	0	0	0	0	0	0	0	0	0	0	0	0	0	0
ARHGAP8	6	7	0	5	4	8	1	0	6	7	1	8	7	2	0	0	0	2	13	8	11	7	7	0	5	7	8	1	8	6	6	1	7	8	0	6	7	3	4	16
ARHGAP9	0	0	0	0	0	0	0	0	0	0	0	0	0	0	1	0	0	0	0	0	3	0	0	0	6	0	0	0	0	0	0	0	0	0	0	6	0	0	0	0
ARHGDIA	10	19	12	15	18	24	12	11	18	14	17	26	14	20	12	31	18	23	29	19	30	28	34	29	20	35	9	19	21	37	32	15	17	23	35	26	22	34	61	33
ARHGDIB	0	0	0	0	0	0	0	0	0	0	0	0	0	0	0	0	0	0	6	0	4	0	9	0	8	16	0	0	0	0	0	0	0	0	7	7	0	0	0	0
ARHGDIG	1	1	0	0	0	0	0	1	0	0	0	0	0	0	0	0	0	0	1	1	1	3	0	1	0	0	0	0	0	0	0	0	3	0	1	1	0	0	0	0
ARHGEF1	11	2	10	18	8	7	0	2	8	13	6	39	21	19	38	25	6	0	23	6	10	30	10	17	28	48	23	41	38	39	58	22	11	10	17	14	7	8	2	29
ARHGEF10	0	6	0	1	6	1	3	1	1	0	7	5	21	15	4	6	3	2	8	0	3	5	3	3	49	71	48	57	10	55	60	9	4	2	9	2	0	0	19	10
ARHGEF10L	0	1	6	1	0	0	0	2	1	0	3	3	0	2	0	3	0	0	0	0	0	8	0	3	2	20	0	11	6	5	5	2	2	1	3	1	1	16	11	7
ARHGEF11	16	32	27	14	42	5	23	28	18	48	17	32	19	28	31	55	16	30	32	55	37	20	38	16	44	107	20	102	75	25	83	46	33	27	38	50	66	68	37	48
ARHGEF12	62	36	80	118	52	95	59	108	57	100	30	95	67	79	144	197	76	103	134	120	101	114	141	146	90	114	44	82	126	202	209	203	99	130	124	144	62	182	315	251
ARHGEF15	0	0	0	0	0	3	0	0	0	0	0	0	0	0	0	0	0	0	2	0	0	0	0	0	0	0	0	0	0	0	0	0	0	0	0	0	0	0	0	0
ARHGEF16	33	36	16	18	20	32	20	16	19	21	15	30	83	39	14	72	37	25	43	38	69	71	62	28	41	72	20	30	46	40	15	39	29	29	50	32	35	84	36	50
ARHGEF17	0	0	0	0	0	0	0	0	0	0	1	0	0	0	0	0	0	0	0	0	0	1	0	0	1	0	0	0	0	0	0	0	0	0	2	0	0	0	4	0
ARHGEF18	26	29	29	25	32	22	12	21	5	19	10	65	41	55	34	75	10	22	53	50	68	48	70	33	45	133	32	70	34	60	47	46	33	49	26	35	36	38	79	54
ARHGEF19	0	0	0	0	0	0	0	0	0	0	0	0	0	0	0	0	0	0	2	0	0	0	0	0	0	0	0	0	0	0	0	0	0	0	0	0	0	0	0	0
ARHGEF2	15	7	13	7	6	22	9	10	2	0	0	20	21	3	5	10	4	3	7	1	8	20	8	14	21	21	13	11	8	21	0	1	28	18	7	2	11	34	6	38
ARHGEF25	0	0	0	0	0	0	0	3	0	0	0	2	7	2	5	1	2	3	5	0	0	3	2	2	4	2	0	7	6	0	1	1	0	2	1	0	1	4	1	1
ARHGEF26	249	324	301	354	363	403	143	233	293	321	230	526	491	463	440	493	382	441	529	572	493	488	457	328	664	866	452	653	585	625	608	486	381	295	471	462	424	429	524	462
ARHGEF28	189	316	168	269	153	174	148	241	123	136	105	229	338	408	457	608	62	105	243	140	438	245	373	258	588	1048	501	680	630	816	706	659	287	282	350	390	387	474	443	404
ARHGEF3	208	341	149	215	216	328	122	210	262	301	172	448	366	437	445	387	344	336	425	411	429	298	307	329	356	598	245	593	442	603	518	259	303	281	363	406	464	533	602	391
ARHGEF33	3	4	6	7	3	5	8	27	3	1	3	8	4	8	7	30	3	0	18	17	13	12	10	14	9	8	9	7	11	3	17	14	13	8	19	29	26	11	65	31
ARHGEF37	35	23	13	23	9	18	21	15	21	12	8	36	15	23	30	34	21	18	28	27	52	18	23	19	62	38	34	61	49	63	69	62	14	32	20	65	32	20	51	39
ARHGEF38	58	61	35	27	50	36	9	32	53	64	7	73	64	14	41	19	23	60	59	27	42	49	44	41	43	92	49	99	50	76	80	43	43	67	27	100	59	66	108	63
ARHGEF39	27	48	28	34	37	51	13	41	24	34	29	54	21	55	45	32	39	57	54	23	67	35	41	52	29	53	25	22	35	36	15	20	26	75	45	69	52	59	80	72
ARHGEF4	1	10	0	2	1	1	1	0	2	0	11	1	1	4	0	1	0	3	2	11	7	1	4	7	2	14	3	7	3	0	9	11	3	11	14	18	28	22	13	25
ARHGEF40	0	14	4	15	0	2	5	5	1	0	0	0	9	1	4	6	3	2	4	2	10	3	4	0	0	9	3	0	4	7	7	0	7	17	1	21	1	0	4	33
ARHGEF5	2	2	0	12	1	3	7	1	1	0	0	0	0	8	0	0	0	0	0	0	8	5	0	5	0	0	2	10	4	3	8	20	4	0	18	4	5	13	25	2
ARHGEF6	0	0	3	6	0	0	3	4	0	0	0	0	0	0	0	0	0	0	0	0	0	0	1	0	0	0	0	0	4	5	9	2	0	0	0	0	0	10	0	18
ARHGEF7	5	12	3	17	5	9	2	4	7	9	7	14	0	15	12	9	2	5	16	41	27	4	23	5	11	28	16	15	13	27	9	11	11	5	37	46	19	21	16	19
ARHGEF9	0	1	1	3	1	1	5	1	0	3	4	0	0	2	0	1	2	6	0	0	3	0	13	4	0	1	0	0	0	0	4	0	5	7	0	9	0	8	1	4
ARID1A	182	125	142	186	100	131	91	83	125	178	70	159	185	126	171	181	129	173	196	204	185	142	225	166	148	266	110	207	166	186	164	194	128	154	193	216	116	226	663	262
ARID1B	20	89	26	52	41	38	28	29	24	46	26	50	13	26	71	92	49	48	39	44	96	59	72	61	59	114	27	54	33	103	98	79	18	49	63	101	77	56	55	111
ARID2	87	91	51	102	85	87	72	89	97	102	41	100	67	92	126	102	90	180	208	127	175	157	101	152	197	271	83	171	146	250	212	169	146	146	136	114	71	81	231	163
ARID3A	0	0	0	1	0	0	0	0	0	0	0	0	0	0	0	0	0	0	0	0	0	0	0	0	0	1	0	0	0	0	0	0	0	0	1	0	0	0	0	0
ARID3B	85	86	82	119	95	95	26	92	41	58	32	62	68	94	55	65	104	90	112	120	144	94	130	91	66	77	60	159	114	106	105	89	69	101	120	116	132	130	128	150
ARID3C	0	0	0	2	1	0	0	1	0	0	0	0	3	0	0	3	0	0	0	0	0	0	0	0	6	1	0	0	0	0	2	1	0	0	0	0	0	0	0	0
ARID4A	314	231	294	388	304	267	211	219	329	490	296	717	447	412	454	726	314	518	421	436	645	402	391	461	830	1178	656	962	796	969	1084	878	312	533	620	563	543	603	885	544
ARID4B	35	45	27	37	27	26	23	27	12	33	27	67	40	11	38	40	20	32	49	16	40	35	19	46	26	115	40	49	39	46	50	83	40	42	63	64	60	77	125	68
ARID5A	42	27	40	27	28	31	17	21	43	40	13	66	56	53	57	112	21	48	52	60	87	61	81	42	35	52	29	50	52	21	45	58	37	55	41	55	19	33	41	38
ARID5B	266	255	227	203	183	211	129	217	243	212	112	289	264	323	380	330	304	389	380	375	365	385	290	322	462	725	325	563	542	616	580	466	465	505	556	695	406	430	755	518
ARIH1	143	99	52	257	98	145	59	133	62	62	44	107	87	44	203	373	131	100	98	101	161	126	121	186	115	138	85	119	98	80	242	157	99	99	83	114	120	150	252	292
ARIH2	176	151	101	138	45	128	124	120	12	16	48	76	168	126	125	146	18	34	53	39	116	218	196	118	187	227	95	179	151	230	149	124	186	208	271	340	225	191	286	296
ARIH2OS	0	0	0	0	3	0	4	1	0	0	0	1	0	0	0	4	2	3	0	1	2	9	0	1	0	0	2	7	3	6	2	0	2	5	18	10	9	10	0	4
ARL1	348	371	300	396	422	329	224	314	306	277	198	337	402	325	524	448	324	447	400	473	421	481	536	273	734	916	479	596	525	501	746	572	458	347	418	705	439	789	637	478
ARL10	36	46	46	72	38	59	29	31	5	5	18	44	72	76	49	52	0	9	61	78	81	69	82	51	57	59	51	62	85	150	51	82	79	26	27	72	89	67	22	35
ARL11	0	0	0	0	0	0	1	0	0	0	0	0	0	0	0	0	0	0	0	0	0	0	0	0	0	0	0	0	0	0	0	0	0	0	0	0	0	13	3	0
ARL13A	60	84	39	63	58	49	39	32	47	49	65	109	51	73	104	96	70	60	87	85	80	75	93	43	25	25	25	25	57	59	69	21	59	77	70	111	110	16	198	119
ARL13B	189	220	108	216	136	185	158	98	175	244	108	279	235	222	264	344	183	223	238	224	193	209	172	133	425	612	308	483	427	545	449	409	215	210	274	355	268	176	360	276
ARL14	0	0	0	0	2	0	0	0	0	0	2	0	0	0	0	0	0	0	0	0	0	0	0	0	5	0	0	0	0	8	0	0	0	0	0	0	16	5	0	0
ARL14EP	263	299	168	255	251	233	165	170	211	266	211	465	325	411	364	414	403	442	441	491	742	457	473	404	342	288	150	294	362	299	429	284	292	353	379	466	407	300	677	492
ARL14EPL	3	5	6	11	8	7	4	5	5	3	3	6	0	2	1	18	18	4	10	13	0	14	1	15	1	13	2	2	0	6	7	5	14	8	10	29	0	0	10	12
ARL15	253	346	228	324	245	324	186	254	240	258	195	419	367	362	338	352	363	308	387	372	387	287	340	350	509	643	251	339	434	465	520	336	212	453	291	363	304	402	485	232
ARL16	0	2	4	0	0	4	3	1	4	5	5	9	7	6	0	5	0	1	3	6	0	0	6	0	0	8	0	3	14	14	7	17	3	15	0	10	4	0	15	0
ARL2	5	4	2	5	1	3	5	8	2	6	3	8	5	6	2	6	10	5	5	5	11	7	4	3	1	12	5	5	6	15	1	1	4	4	3	9	3	5	12	5
ARL2BP	302	368	295	350	291	379	240	270	211	341	200	441	268	326	424	443	225	540	573	497	543	410	535	376	623	1014	430	833	675	792	817	762	381	343	441	568	461	508	487	571
ARL3	6	8	2	1	2	3	10	2	8	0	5	4	11	6	1	14	4	10	2	2	10	2	10	1	3	0	7	0	12	8	12	10	2	8	4	7	0	12	18	4
ARL4A	621	658	420	553	423	498	326	304	262	232	200	395	357	457	501	488	328	483	481	492	703	721	645	462	582	1017	477	550	738	535	860	622	721	730	721	1059	804	970	1213	1008
ARL4C	2	0	0	0	0	1	0	0	0	0	0	0	0	0	0	0	1	1	0	0	0	0	0	2	0	0	0	0	0	2	3	6	4	0	0	0	2	0	0	0
ARL4D	14	2	28	9	1	18	0	6	78	35	34	64	168	141	76	128	0	9	8	9	8	0	17	8	74	153	188	89	70	201	92	197	38	3	93	24	58	15	108	29
ARL5A	348	339	206	274	77	277	215	224	71	85	87	240	407	299	384	523	48	36	167	135	362	463	342	255	556	1039	477	757	655	874	666	645	482	526	408	582	379	721	622	673
ARL5B	65	54	41	53	75	92	22	54	45	62	31	101	129	78	53	262	57	34	66	104	65	69	55	37	113	165	123	77	116	108	120	50	108	187	185	190	163	148	83	199
ARL5C	0	0	0	0	0	0	0	0	0	0	0	0	0	0	0	0	0	0	0	0	0	0	0	0	0	0	0	0	0	0	0	0	0	0	0	0	0	0	0	0
ARL6	967	766	679	868	845	1001	580	608	797	1020	590	1404	1119	1061	1169	1502	1027	1117	1419	1205	1569	1439	1523	1027	1085	1516	867	1265	1196	1185	1461	835	1195	1372	1359	1936	1419	1432	1355	1590
ARL6IP1	1701	1578	1248	1391	1246	1317	883	1050	863	1111	696	1760	1105	1284	1428	1560	1522	1771	2016	2210	2546	1895	2007	1474	1224	2173	1070	1345	1579	1609	2182	1367	1803	1792	1705	2000	1774	1967	2824	2453
ARL6IP4	8	6	10	11	1	9	13	19	9	8	4	16	7	10	10	6	17	13	26	16	13	27	15	8	0	17	4	0	7	6	17	0	28	23	18	16	13	21	47	32
ARL6IP5	2	9	6	5	6	3	4	4	0	8	6	12	16	6	14	5	10	11	6	4	6	25	4	15	9	1	8	0	2	2	27	18	5	6	22	3	36	10	25	18
ARL6IP6	115	142	141	159	127	170	100	96	205	221	149	247	276	217	316	310	138	191	189	206	265	207	254	231	261	266	173	292	280	209	324	164	122	151	172	253	182	191	224	235
ARL8A	0	0	0	0	0	0	0	1	0	0	0	0	0	0	0	0	0	1	0	0	1	0	0	0	0	0	0	0	0	0	0	1	0	2	0	0	0	0	0	2
ARL8B	57	145	138	180	7	32	121	139	1	8	1	2	18	67	96	93	3	15	7	4	12	57	110	134	23	133	57	81	144	208	183	121	122	143	173	188	185	210	192	199
ARL9	1	0	1	1	0	0	0	1	1	1	0	1	0	2	0	1	0	0	0	3	0	0	0	0	0	0	0	0	0	0	0	0	0	0	0	5	6	0	8	0
ARMC1	750	634	535	619	552	579	415	427	525	672	408	779	713	832	832	775	722	938	958	835	1130	880	786	734	1158	1850	930	1176	1550	1598	1645	1320	588	945	894	1045	1195	968	1123	992
ARMC10	1208	1250	1103	1294	804	1215	760	855	874	937	608	1390	1376	1526	1716	1977	996	1293	1479	1505	1932	1682	1596	1352	2302	3048	1521	2215	2196	2669	2608	1979	1162	1483	1395	2031	1613	1866	2043	1644
ARMC12	2	10	4	10	12	2	3	2	0	0	0	5	5	1	0	1	23	15	34	17	15	10	12	12	0	1	0	3	2	0	2	2	9	21	11	24	11	12	14	12
ARMC2	361	297	275	342	307	338	163	243	273	273	192	485	340	383	425	457	311	333	422	386	588	321	397	334	301	566	224	373	431	445	467	314	365	460	419	613	384	439	828	497
ARMC3	0	0	0	0	0	0	0	0	0	0	0	1	0	0	0	0	0	0	0	0	0	0	0	0	0	0	1	0	0	0	0	0	2	0	0	0	0	0	0	0
ARMC4	0	0	0	0	0	0	0	0	0	0	0	0	5	0	0	0	0	0	10	0	0	0	0	0	0	0	0	0	0	10	3	0	4	7	0	0	0	8	0	0
ARMC5	0	0	1	0	0	0	0	0	0	0	0	2	0	0	0	0	0	0	0	0	0	2	0	0	1	0	0	4	0	0	1	0	1	0	0	1	3	11	1	0
ARMC6	0	0	0	0	0	0	0	0	0	0	0	0	0	4	0	2	0	3	6	0	0	0	0	2	0	0	0	0	0	0	0	0	0	0	0	0	0	0	0	0
ARMC7	123	140	132	118	113	140	66	99	132	139	68	194	172	227	165	198	198	217	297	285	266	315	232	200	239	301	140	209	182	204	129	106	142	141	160	216	195	140	262	236
ARMC8	29	49	52	51	34	56	30	53	22	21	26	44	22	48	39	34	35	36	45	55	94	70	38	31	56	162	79	106	52	107	171	73	49	89	60	39	21	65	85	87
ARMC9	2	0	0	2	0	0	0	0	0	4	0	1	6	4	4	0	5	4	2	4	0	1	2	2	0	10	4	3	6	3	5	2	1	9	4	5	6	5	1	4
ARMCX1	0	0	0	0	0	0	0	0	0	0	0	0	0	0	0	0	0	0	0	0	0	0	0	0	0	0	0	0	0	0	0	0	0	0	0	0	0	0	0	0
ARMCX2	0	0	0	0	0	0	0	0	0	0	0	0	0	0	0	0	0	0	0	0	0	0	0	0	0	0	0	0	0	0	0	0	0	0	0	0	0	0	0	0
ARMCX3	0	0	0	0	0	0	0	3	0	0	1	0	0	0	0	0	0	0	0	0	0	0	0	0	0	0	0	0	0	0	0	0	0	0	0	0	0	0	1	0
ARMCX4	0	0	0	0	0	0	0	0	0	0	0	0	0	0	0	0	0	0	0	0	0	0	0	0	0	0	0	0	0	0	0	0	0	0	0	0	0	0	0	0
ARMCX5	0	4	0	7	2	3	2	1	5	2	7	2	9	7	5	0	12	3	0	24	7	0	4	16	12	0	4	0	8	3	3	1	3	8	10	16	0	12	22	7
ARMCX6	0	0	0	0	0	0	0	0	0	0	0	0	0	0	0	0	0	0	0	0	0	0	0	0	0	0	0	0	0	0	0	0	0	0	0	0	0	0	0	0
ARMH1	27	22	23	16	10	33	19	10	16	16	20	19	23	29	40	32	21	34	17	34	27	39	23	30	28	35	28	38	22	40	41	34	43	48	54	50	50	32	98	48
ARMH2	0	0	0	0	0	0	0	0	0	0	0	0	0	0	0	0	0	0	0	0	0	0	0	0	0	0	0	0	0	0	0	0	0	0	0	0	0	0	0	0
ARMH3	207	184	100	154	144	86	110	115	124	115	69	175	129	152	228	142	204	235	302	199	191	249	254	139	324	443	232	401	301	348	221	302	149	153	200	262	246	212	185	172
ARMH4	201	206	92	169	97	141	111	85	108	151	83	145	142	148	136	195	136	198	301	236	203	350	251	191	38	262	75	159	185	223	297	111	219	183	187	316	274	169	400	305
ARMT1	2	0	0	0	1	0	0	0	0	0	0	1	0	6	0	0	0	0	0	0	0	0	0	0	0	0	0	0	0	0	0	1	5	0	0	9	0	0	11	0
ARNT	0	8	1	3	2	0	0	6	0	1	1	7	12	4	14	9	8	0	2	3	0	9	16	9	0	0	0	0	6	0	8	0	6	11	5	4	16	2	4	0
ARNT2	0	9	6	3	7	2	7	2	5	3	2	3	7	9	0	1	6	5	11	16	18	11	4	13	0	2	1	0	1	0	4	1	5	6	18	7	7	13	5	13
ARNTL	456	358	355	397	377	461	266	303	356	402	243	634	483	582	593	633	431	537	635	570	700	490	717	424	954	1263	636	1042	893	913	996	846	386	465	448	626	427	530	730	692
ARNTL2	0	0	0	0	0	0	0	0	0	0	0	0	0	0	0	0	0	0	0	0	0	0	0	0	0	0	0	0	0	0	6	0	0	0	0	0	0	0	0	0
ARPC1A	200	189	129	172	163	194	87	148	151	145	79	200	127	164	204	199	177	185	193	247	302	205	215	173	169	332	113	224	216	199	251	158	278	286	214	404	217	303	438	327
ARPC1B	111	78	57	91	57	85	51	62	34	78	51	125	66	94	62	98	79	97	128	113	144	96	99	85	99	147	68	149	116	129	162	74	101	133	125	175	155	105	164	156
ARPC2	1046	1073	761	1042	770	1054	581	804	213	387	465	893	1056	915	1037	1033	513	758	1251	1370	1610	1254	1408	1157	1080	1373	690	1233	1359	1312	1459	826	1282	1329	1785	1852	1686	1754	2217	1881
ARPC3	3	2	3	2	4	2	2	0	5	3	0	8	2	12	4	14	2	6	10	9	5	4	2	2	11	12	2	2	5	12	3	0	13	3	5	6	6	9	10	8
ARPC4	113	143	100	134	85	133	73	97	117	135	90	173	140	159	131	163	103	180	149	175	206	135	122	103	203	361	122	156	193	176	205	121	159	158	136	265	180	210	281	235
ARPC5	63	70	93	82	75	90	54	70	57	38	38	54	34	37	49	72	93	137	98	157	147	87	99	109	12	69	30	73	38	23	60	28	103	64	139	87	196	105	182	171
ARPC5L	102	100	106	128	117	133	68	73	106	94	62	114	72	171	185	120	107	145	157	169	202	163	142	110	198	176	87	120	162	155	182	81	164	228	155	186	215	193	359	263
ARPIN	88	95	80	74	71	94	46	87	47	56	67	139	51	59	138	123	55	105	175	58	200	130	89	98	123	213	131	94	172	102	161	96	89	124	112	138	153	118	305	185
ARPP19	566	527	416	474	530	584	353	410	322	293	243	625	297	351	525	421	730	729	959	769	886	734	815	589	570	1107	571	733	780	769	780	607	677	813	790	1118	720	832	1347	836
ARPP21	181	195	91	111	112	203	93	112	116	138	111	180	185	212	204	233	93	156	143	166	294	241	163	129	248	757	303	356	455	454	470	408	168	238	247	391	192	243	294	293
ARR3	0	0	0	0	0	0	0	0	0	0	0	0	0	0	0	0	0	0	0	0	0	0	0	0	0	0	0	0	0	0	0	0	0	0	0	0	0	0	0	0
ARRB1	0	5	14	18	9	1	4	12	10	0	1	13	24	0	5	27	13	31	4	3	14	0	10	4	13	23	6	1	3	0	5	8	10	8	46	17	10	12	20	4
ARRB2	1	0	1	2	2	3	1	0	4	3	0	0	9	1	0	1	2	1	0	0	2	6	9	0	0	1	0	6	2	0	2	0	0	0	0	0	0	3	4	4
ARRDC1	72	144	87	147	44	72	55	69	47	49	34	125	146	103	145	189	24	62	75	136	107	148	151	97	170	184	128	188	150	250	220	186	115	118	116	167	144	167	270	158
ARRDC2	235	218	166	197	152	234	106	154	151	169	80	288	195	227	343	203	240	259	407	305	503	495	321	255	336	291	237	201	282	379	234	166	227	158	309	345	312	249	259	294
ARRDC3	150	84	138	134	117	132	71	121	64	87	49	99	127	121	148	107	111	95	238	108	190	107	169	106	138	323	163	198	202	155	283	117	122	226	160	148	129	167	243	204
ARRDC4	5	4	6	2	3	10	0	29	8	0	2	5	0	3	7	7	1	0	5	5	0	0	0	2	0	1	13	2	0	0	15	15	4	5	0	30	12	20	32	14
ARRDC5	0	0	0	0	0	0	0	0	0	0	0	0	0	0	0	0	0	0	0	0	0	0	0	0	0	0	0	0	0	0	0	0	0	0	0	0	0	0	0	0
ARSA	2	7	6	6	4	0	0	1	0	0	1	0	0	3	0	2	5	8	7	4	0	5	4	0	1	6	1	6	9	0	0	0	1	0	9	7	1	0	0	0
ARSB	30	13	16	25	10	19	27	42	17	23	25	37	44	57	67	66	13	21	5	12	32	96	75	35	61	178	52	114	170	117	105	139	23	25	16	49	47	55	46	46
ARSE	0	0	0	0	0	0	0	0	0	0	0	0	0	0	0	0	0	0	0	0	0	0	0	0	0	0	0	0	0	0	0	1	0	0	0	0	0	0	0	0
ARSG	0	0	4	2	1	0	0	0	0	0	0	3	1	1	1	9	2	0	0	1	1	0	2	4	0	8	0	1	2	0	1	4	0	2	0	4	0	1	7	12
ARSH	0	0	0	0	0	0	0	0	0	0	0	0	0	0	0	0	0	0	0	0	0	0	0	0	3	0	0	0	0	0	0	0	0	1	2	0	0	0	0	0
ARSI	0	0	0	0	0	0	0	0	0	0	0	0	0	0	0	0	0	0	1	0	0	0	0	0	0	0	0	0	0	0	0	0	0	3	0	0	0	0	0	0
ARSJ	0	0	0	0	0	0	0	0	0	0	0	0	0	0	0	0	0	0	0	0	0	0	0	0	0	1.42	0	0	0	0	0	0	19	0	17	0	13	0	0	0
ARSK	0	0	0	0	0	0	0	0	0	0	0	0	0	0	0	0	0	0	0	0	0	0	0	0	1	0	0	0	0	0	0	0	0	0	7	0	0	0	0	0
ART1	0	0	0	0	0	2	0	0	0	0	0	0	0	0	0	0	0	0	0	0	0	1	0	0	0	0	0	0	0	0	0	0	0	3	0	0	0	0	0	0
ART3	26	30	29	24	27	32	25	21	30	39	37	45	42	43	41	36	36	38	54	55	45	89	60	42	70	77	33	51	75	64	102	28	60	57	67	59	42	33	90	31
ART4	0	0	0	0	0	0	0	0	0	0	0	0	0	0	0	0	0	0	0	0	0	0	0	0	0	0	0	0	0	0	0	0	0	0	0	0	0	0	0	0
ARTN	0	0	0	0	0	0	0	0	0	0	0	0	0	0	0	0	0	0	0	0	0	0	0	0	0	0	0	0	0	0	0	0	0	0	0	0	2	0	1	0
ARV1	7	2	1	2	2	10	1	5	2	0	2	0	7	5	5	6	9	3	4	0	1	17	3	7	4	19	4	0	1	9	6	2	7	7	8	6	14	26	3	5
ARVCF	0	0	1	0	0	0	2	0	0	0	0	1	3	1	3	9	0	3	0	0	0	2	1	0	0	0	2	0	0	0	0	0	5	7	2	4	6	2	5	5
ARX	0	0	0	0	0	0	0	0	0	0	0	0	0	3	0	0	0	0	0	0	0	0	4	0	0	0	0	4	0	0	0	0	0	0	1	0	0	0	0	0
AS3MT	19	24	26	18	19	24	6	19	40	14	21	30	12	29	55	35	39	30	17	39	66	43	38	33	21	76	23	10	15	32	34	17	34	63	108	139	88	35	119	57
ASAH1	156	117	95	92	102	147	68	80	161	98	67	87	98	131	157	168	153	154	107	174	191	172	124	144	77	235	111	144	136	152	191	136	170	150	98	242	171	172	239	293
ASAH2	33	40	28	28	15	18	13	20	12	1	12	13	58	26	12	18	31	45	29	83	46	69	20	9	10	72	32	9	53	41	26	17	31	21	10	102	70	64	81	34
ASAP1	50	73	60	50	75	53	22	48	72	45	42	79	77	134	116	103	103	163	147	104	138	119	134	91	94	217	78	162	150	143	142	53	52	74	47	65	83	105	187	88
ASAP2	5	6	3	6	7	25	9	3	12	12	13	19	24	25	21	34	29	20	27	17	45	25	10	15	12	84	11	9	32	1	41	24	12	26	14	35	11	16	51	25
ASAP3	9	4	5	9	8	10	4	3	6	8	7	13	4	16	11	18	12	12	10	17	15	18	20	16	10	11	12	10	24	19	21	12	7	19	14	13	21	25	28	17
ASB1	8	8	9	4	0	2	4	12	1	0	2	0	2	3	9	10	3	2	0	2	4	11	14	8	6	1	2	10	8	13	4	5	5	2	8	8	6	8	11	8
ASB10	0	0	0	0	0	0	0	0	0	0	0	0	0	0	0	0	0	0	0	0	1	0	0	0	0	0	0	0	0	0	0	0	0	0	0	0	0	0	0	0
ASB11	449	400	341	413	407	359	225	279	405	357	237	628	413	377	559	502	391	497	412	419	666	421	424	352	759	1209	502	866	756	962	805	695	516	580	654	686	557	649	930	758
ASB12	0	2	0	2	0	6	0	2	0	0	0	0	0	0	0	0	0	7	4	0	0	3	0	2	6	7	7	0	0	0	7	0	0	10	9	18	13	9	1	2
ASB13	0	0	0	0	0	0	0	0	0	0	0	0	0	0	0	0	0	0	0	0	0	0	1	0	0	0	0	0	0	0	0	0	0	0	0	2	0	0	0	0
ASB14	0	0	0	0	0	0	0	0	0	0	0	0	0	2	12	4	0	0	0	0	0	0	0	0	5	0	0	1	0	0	0	0	0	0	0	0	0	0	0	0
ASB15	0	0	0	0	0	0	0	0	0	4	0	1	0	0	1	17	0	0	0	3	0	0	0	0	0	0	0	0	0	0	0	0	0	0	0	14	0	0	0	0
ASB16	8	3	11	11	2	9	1	10	4	0	0	9	0	21	24	23	4	3	0	0	8	3	17	22	0	10	0	2	1	19	8	12	1	2	6	4	19	15	36	41
ASB17	0	0	0	0	0	0	0	0	0	0	0	0	0	0	0	0	0	0	0	0	0	0	0	0	0	0	0	0	0	0	0	0	0	0	0	0	0	0	0	0
ASB18	0	0	0	0	0	0	0	0	0	0	0	0	0	0	0	0	0	0	0	0	0	0	0	0	0	0	0	0	0	2	0	0	0	0	0	1	0	0	0	0
ASB2	0	0	0	0	0	0	0	0	0	0	0	0	0	0	0	0	0	0	0	0	0	0	0	0	0	0	0	0	0	0	0	0	0	0	0	0	0	0	0	0
ASB3	349	472	286	396	332	441	205	271	361	474	262	724	398	642	464	477	583	552	642	508	596	506	503	392	644	952	592	725	672	511	800	467	242	337	215	389	285	364	382	261
ASB4	0	0	0	0	1	0	0	0	0	0	0	0	0	0	0	0	0	0	0	0	3	0	0	0	6	0	2	0	0	0	0	0	0	0	0	3	0	0	0	0
ASB5	0	0	0	0	0	0	0	0	4	0	0	0	0	0	0	0	0	0	0	0	0	0	0	0	0	0	0	0	0	0	0	0	0	0	0	0	0	0	0	0
ASB6	54	43	36	46	37	29	18	15	49	32	37	72	74	45	57	76	39	63	58	60	108	59	64	43	45	62	31	89	90	44	85	52	32	29	46	84	54	44	49	88
ASB7	11	16	5	18	6	3	1	5	1	5	4	2	5	6	8	14	2	0	5	17	10	19	7	15	11	0	6	2	3	2	5	1	11	10	15	2	0	6	43	3
ASB8	174	213	105	128	124	209	110	172	111	149	65	160	187	148	181	177	192	176	264	235	322	213	229	190	173	500	144	158	255	251	230	182	237	227	177	292	295	264	418	346
ASB9	0	0	0	0	1	0	6	7	0	0	2	0	0	0	0	0	0	1	0	6	0	0	0	0	0	0	3	6	2	7	0	5	0	2	0	12	4	5	21	0
ASCC1	203	268	183	234	189	218	147	144	154	177	102	301	161	206	289	307	194	193	299	304	416	365	263	248	207	460	169	302	374	376	314	228	260	358	467	559	393	381	558	425
ASCC2	17	21	12	24	19	3	10	14	3	17	6	25	26	27	30	28	19	21	33	38	33	12	32	27	15	17	10	11	13	36	20	12	25	28	15	51	35	34	22	41
ASCC3	99	128	34	84	103	141	73	121	67	74	42	151	128	152	81	99	132	139	142	71	200	128	88	96	198	185	127	164	155	149	189	151	113	149	130	176	151	111	241	160
ASCL1	0	0	0	0	0	0	0	0	0	0	0	0	0	0	0	0	0	0	0	0	0	0	0	0	0	0	0	0	0	0	0	0	0	0	0	0	0	0	0	0
ASCL2	0	0	0	0	0	0	0	1	0	0	0	0	0	0	0	2	0	0	0	0	0	0	0	1	2	0	0	0	0	0	0	0	0	0	0	0	0	0	2	0
ASCL3	0	0	0	0	0	0	0	0	0	0	0	0	0	0	0	0	0	0	0	2	0	0	0	0	0	0	0	0	0	0	0	0	0	0	0	0	0	0	0	0
ASCL4	0	0	0	0	0	0	0	1	0	0	0	4	0	0	0	0	0	0	0	0	0	0	0	1	0	0	0	0	6	4	0	0	0	0	0	0	0	9	0	1
ASCL5	0	0	0	0	0	0	0	0	0	0	0	0	0	0	0	1	0	0	0	0	0	0	0	0	0	0	0	0	0	0	0	0	0	0	0	0	0	0	0	1
ASF1A	415	409	337	442	349	447	295	280	296	354	212	614	437	487	531	605	454	582	737	604	771	660	696	573	344	615	278	514	444	503	613	322	557	492	632	711	660	521	797	796
ASF1B	1969	1721	1340	1750	1591	1792	1129	1393	1554	1466	880	2094	1953	1704	2008	2197	1487	2208	2333	2157	3005	2097	2366	1586	2960	4652	2181	3377	3205	3829	3853	2786	2108	2358	2107	2922	2416	2180	3712	2663
ASGR1	6	3	1	0	0	0	3	2	2	3	4	4	16	6	25	0	3	14	8	11	7	2	3	1	0	38	6	3	7	9	5	0	0	3	0	21	3	0	2	16
ASGR2	0	0	0	0	0	0	0	0	0	0	0	0	5	0	0	0	0	0	0	0	0	0	0	0	0	0	0	0	0	0	0	0	0	0	0	0	0	0	0	0
ASH1L	71	57	57	37	33	57	11	19	33	18	21	35	45	74	29	39	29	67	66	102	86	42	21	53	148	78	59	127	102	92	72	64	96	50	61	89	38	51	108	100
ASH2L	650	680	539	786	597	747	497	490	670	688	431	897	820	861	990	956	747	753	800	932	1231	930	794	652	1576	2066	987	1437	1385	1501	1497	1198	709	865	647	784	602	687	925	908
ASIC1	6	17	22	23	6	4	3	18	15	9	10	17	22	24	13	27	6	16	18	9	25	11	24	20	26	14	23	22	12	40	22	18	3	8	36	23	7	28	53	13
ASIC2	0	0	0	0	0	0	0	0	0	0	0	0	0	0	0	0	0	0	0	0	0	0	0	0	0	0	0	0	0	0	0	0	0	0	0	0	0	0	0	0
ASIC3	0	0	0	0	0	0	0	0	0	0	0	0	0	0	0	0	0	0	0	0	0	0	0	0	0	0	0	0	0	0	0	0	0	0	0	0	0	0	0	0
ASIC4	0	0	2	0	0	0	0	1	0	0	0	0	0	0	0	0	0	0	0	0	0	0	0	0	0	0	0	0	0	0	0	0	0	0	0	0	0	0	2	0
ASIC5	0	0	0	0	0	0	0	0	0	0	0	0	0	0	0	0	0	0	0	0	0	0	0	0	0	0	0	0	0	0	0	0	0	0	0	0	0	0	0	0
ASIP	1	0	2	1	4	5	0	2	0	0	0	0	0	0	0	0	0	0	1	0	0	1	2	3	0	0	0	0	0	0	0	0	0	0	0	0	0	0	0	0
ASL	0	0	3	0	0	0	0	2	1	1	3	0	1	0	0	0	1	1	0	0	5	0	3	0	0	0	2	10	3	1	0	0	0	0	2	1	1	2	12	1
ASMT	0	0	1	0	2	0	2	6	10	2	0	1	5	2	8	6	5	1	0	12	25	5	7	9	0	0	4	19	4	0	14	5	2	3	11	0	8	0	0	0
ASMTL	1	1	5	1	0	0	0	2	3	0	0	0	0	1	2	4	0	0	0	0	3	0	0	2	3	0	1	0	1	2	4	0	1	0	1	0	1	6	7	9
ASNA1	16	20	18	17	27	17	8	9	24	12	13	29	12	19	34	39	16	8	21	25	44	26	14	30	24	7	19	24	42	18	29	4	18	30	36	41	41	65	68	51
ASNS	72	26	37	31	25	49	18	22	40	78	40	112	40	77	100	33	43	43	31	52	62	56	39	27	32	116	42	87	46	77	102	29	30	27	21	43	47	12	122	40
ASNSD1	230	213	137	155	144	125	112	173	103	164	78	216	146	137	198	140	242	288	263	242	407	271	311	182	39	103	107	74	83	42	65	55	297	340	234	408	290	360	443	363
ASPA	0	0	0	0	0	0	0	0	0	0	0	0	0	0	0	0	0	0	0	0	0	0	0	0	0	0	0	0	0	0	0	0	0	0	0	0	0	0	0	0
ASPDH	0	0	0	3	0	0	0	0	0	0	0	0	0	0	0	0	0	0	0	0	0	0	0	0	0	0	0	6	0	0	0	0	0	0	0	3	7	4	2	0
ASPG	0	0	0	0	0	0	0	0	0	0	0	0	0	0	0	0	0	0	0	0	0	0	0	0	0	0	0	0	0	0	0	0	0	0	0	0	0	0	0	0
ASPH	2	0	5	4	2	3	5	2	1	2	1	1	11	0	2	0	0	3	0	4	9	4	6	8	0	4	0	6	3	0	2	1	2	0	1	5	2	0	3	1
ASPHD1	3	2	3	1	1	2	2	1	2	9	1	1	2	1	2	4	1	7	1	3	2	5	2	4	6	2	2	4	3	3	5	4	4	3	5	6	4	2	3	7
ASPHD2	0	3	4	4	0	9	3	6	0	3	1	0	9	9	2	16	2	9	0	2	13	7	5	15	4	0	0	1	0	1	3	7	4	5	14	0	14	7	10	6
ASPM	285	348	238	360	296	388	214	248	246	287	227	508	371	443	638	629	534	552	673	672	721	635	551	482	870	1365	677	1195	1048	1153	1389	985	339	435	398	492	478	439	787	462
ASPN	1	0	1	0	0	0	0	0	0	0	0	0	0	0	0	0	0	0	1	0	0	0	0	0	0	0	0	1	0	0	0	0	0	0	0	0	0	0	0	0
ASPRV1	0	1	0	8	0	3	0	3	1	10	0	2	5	4	4	0	5	3	0	0	0	3	0	4	0	1	1	0	6	2	11	8	0	0	0	7	8	0	0	5
ASPSCR1	18	16	11	9	2	27	18	11	16	19	20	51	20	38	28	29	20	25	44	25	45	45	55	17	7	20	22	28	28	14	35	9	21	23	17	24	28	7	41	27
ASRGL1	166	116	86	122	112	153	83	89	68	80	43	159	146	97	162	157	130	174	217	212	245	231	199	128	234	208	136	173	171	257	154	139	163	232	187	284	277	247	266	222
ASS1	0	0	0	0	0	1	0	0	1	1	4	0	0	2	0	0	0	1	1	0	0	0	0	1	3	1	5	4	0	2	0	0	1	0	1	0	0	6	1	6
ASTE1	15	21	7	29	13	42	3	14	18	7	9	5	39	32	11	24	49	38	28	54	5	20	87	15	0	28	66	68	56	52	49	33	35	48	29	67	17	10	52	46
ASTL	273	286	306	322	268	261	144	226	283	304	142	311	323	342	374	365	362	388	529	418	449	503	516	309	355	644	171	348	360	332	395	293	518	473	557	739	535	597	804	661
ASTN1	0	0	0	0	0	1	0	0	0	0	1	2	0	0	0	3	0	0	0	0	0	0	0	0	1	0	0	1	0	2	7	1	0	0	5	6	0	1	0	0
ASTN2	22	21	22	33	20	27	16	16	13	21	15	13	11	33	18	12	4	52	16	35	54	20	21	11	13	26	5	18	13	18	8	16	45	22	16	45	15	11	24	37
ASXL1	0	0	0	0	0	1	0	1	2	0	1	9	0	0	7	3	0	1	0	2	2	0	1	0	0	5	10	0	13	0	5	0	1	0	1	3	2	13	11	0
ASXL2	284	360	211	317	279	436	213	267	102	114	139	396	531	391	389	558	190	229	565	504	646	631	579	494	702	1044	503	814	561	616	543	337	435	266	466	535	523	539	515	549
ASXL3	2	0	0	2	10	0	3	11	6	7	3	13	0	27	0	0	3	16	16	0	4	6	12	15	0	19	1	8	2	0	0	13	7	5	23	0	11	8	6	7
ASZ1	94	27	41	33	67	34	43	22	56	78	33	124	42	84	118	59	88	31	110	57	67	19	82	121	63	135	46	112	154	75	247	134	55	62	69	67	70	15	84	62
ATAD1	800	673	533	656	697	824	477	538	662	956	562	1238	962	1055	1124	1426	828	908	1367	1013	1302	1115	1089	806	1104	1500	881	1373	1300	1501	1612	1018	896	1153	1149	1420	1099	1194	1122	1167
ATAD2	23	43	17	29	23	37	27	34	34	36	29	63	53	45	71	60	8	27	31	62	51	38	42	20	102	59	78	127	81	76	86	76	28	56	56	90	38	34	52	66
ATAD2B	18	8	16	16	17	15	27	19	17	35	7	50	43	74	17	30	17	36	34	42	53	27	27	38	48	24	49	83	99	123	105	82	78	59	66	74	9	103	22	58
ATAD3A	0	0	0	0	0	0	2	0	0	0	0	0	0	0	0	0	0	0	0	0	0	0	0	0	0	0	0	0	0	0	0	0	0	0	0	0	0	1	0	0
ATAD5	141	202	109	229	177	197	92	177	277	292	170	382	437	350	455	362	237	249	317	280	283	249	164	213	454	1040	257	467	588	500	611	339	214	243	161	332	235	301	321	359
ATAT1	18	17	11	24	8	9	9	7	13	21	9	27	18	24	18	19	14	22	11	18	57	14	21	18	16	41	22	46	36	42	30	35	20	21	34	36	25	33	40	37
ATCAY	26	41	15	44	3	19	25	31	12	30	2	8	14	21	12	0	27	28	15	22	23	51	34	17	1	36	6	21	4	0	10	18	25	19	39	49	14	15	2	18
ATE1	77	44	27	58	38	48	26	52	40	58	38	126	48	116	125	104	9	20	41	48	19	34	38	40	107	96	63	113	119	132	117	46	26	25	31	22	28	32	29	29
ATF1	71	152	102	64	119	139	78	65	88	41	55	112	82	123	164	78	137	128	81	135	169	116	128	119	110	208	62	133	169	156	160	227	98	112	146	222	173	140	171	201
ATF2	1908	1716	1253	1685	1382	1449	1034	1315	1350	1578	989	2326	1914	1879	2036	2099	1834	2107	2547	2318	2979	2107	2103	1871	2746	4400	2180	3214	3125	3860	3501	2652	1751	2159	1698	2399	1908	2618	3214	2377
ATF3	40	29	17	28	20	39	12	24	0	2	8	21	30	24	29	27	1	0	32	13	38	53	52	29	31	50	8	35	22	29	28	19	23	33	21	31	13	56	80	36
ATF4	302	230	195	239	182	242	121	172	231	218	195	349	308	246	299	430	289	344	294	435	469	300	354	236	374	464	233	305	372	423	413	336	335	358	428	481	316	521	563	401
ATF5	0	0	0	0	1	0	0	0	0	0	0	0	0	0	0	1	0	0	0	0	0	0	0	0	0	0	0	0	0	0	0	1	0	0	0	0	0	0	0	0
ATF6	164	167	170	217	137	180	143	171	134	159	78	257	171	307	206	222	332	241	276	333	242	406	244	238	434	416	227	423	326	525	381	262	243	232	223	362	218	283	410	384
ATF6B	30	38	35	51	49	34	17	25	35	63	20	46	67	38	56	76	67	48	62	72	119	33	66	56	71	140	63	54	100	90	96	51	39	41	70	78	43	61	71	55
ATF7	204	200	167	196	188	253	121	236	190	187	85	193	187	303	231	198	322	250	341	389	487	443	336	228	302	332	245	318	245	257	227	132	206	229	278	342	270	258	308	307
ATF7IP	10	82	65	38	47	97	29	67	45	46	33	73	53	84	49	66	112	154	65	126	173	48	120	68	51	116	79	164	100	94	111	70	60	52	109	67	41	119	106	60
ATF7IP2	49	37	14	27	51	41	29	41	68	91	24	77	44	60	56	51	75	61	67	80	153	105	56	98	123	126	32	123	73	108	129	80	41	100	66	66	71	76	134	111
ATG10	0	5	2	1	0	0	0	0	2	9	1	2	6	4	0	0	7	4	6	0	0	6	4	0	14	5	0	0	4	7	2	0	2	0	0	2	3	0	9	6
ATG101	148	93	68	85	59	54	57	61	64	70	44	102	74	115	136	82	69	64	75	157	142	91	108	73	88	110	66	118	118	83	144	139	88	121	78	156	96	104	186	152
ATG12	125	78	61	66	97	88	67	76	62	67	75	130	71	73	82	134	139	176	157	114	160	144	90	130	132	386	149	288	251	256	253	126	145	209	148	229	135	204	266	251
ATG13	74	55	66	54	54	95	61	45	27	69	51	112	131	62	87	124	44	60	109	128	175	110	108	64	135	338	84	204	185	145	105	73	132	89	127	186	87	74	90	87
ATG14	224	236	155	215	177	262	166	180	252	204	117	339	275	263	386	309	153	286	271	260	431	346	268	203	352	990	288	554	648	627	477	321	200	246	131	473	381	315	359	389
ATG16L1	38	43	25	41	37	44	18	48	30	53	15	47	19	64	44	61	35	35	54	43	76	51	38	52	70	65	36	15	59	44	45	40	16	39	14	70	36	22	52	42
ATG16L2	1	30	22	13	8	9	14	16	14	4	2	5	26	1	0	13	3	17	11	12	40	25	48	10	5	74	15	39	6	0	24	5	17	25	42	7	6	11	40	37
ATG2A	5	6	7	21	6	16	1	4	4	1	3	6	13	12	11	7	9	5	25	13	5	6	10	6	4	30	5	11	5	2	11	5	2	12	2	15	2	18	32	22
ATG2B	14	14	16	26	9	1	17	28	12	7	6	22	29	17	49	68	1	0	36	10	13	11	17	35	39	83	35	14	48	45	60	89	15	46	6	16	14	19	121	29
ATG3	83	230	152	248	9	41	140	152	8	26	4	13	107	212	309	331	9	6	5	8	38	254	318	238	124	429	213	324	319	461	530	247	169	204	108	330	245	153	330	250
ATG4A	14	16	9	16	15	7	12	13	15	14	8	35	14	39	8	25	18	31	36	30	25	17	23	10	22	37	22	31	30	44	48	15	14	23	49	8	10	39	62	33
ATG4B	8	14	15	9	0	4	4	11	2	1	0	2	4	15	27	14	0	1	4	0	2	11	4	15	5	28	8	2	18	21	22	12	14	20	5	33	19	15	25	47
ATG4C	16	19	19	6	5	5	10	6	2	1	0	22	27	15	5	3	13	10	8	6	18	14	32	4	29	16	9	33	11	36	6	11	43	11	34	21	11	3	15	25
ATG4D	6	18	5	55	0	7	22	47	2	0	1	0	1	10	44	18	3	1	5	1	3	8	36	27	4	8	5	1	11	13	23	24	4	4	3	9	9	51	52	61
ATG5	650	657	455	588	603	461	356	467	424	530	260	709	709	757	661	779	658	660	895	636	1056	578	811	711	849	834	551	811	767	762	963	637	393	720	482	992	665	642	694	762
ATG7	57	54	42	54	41	87	22	47	57	51	25	70	107	75	51	64	41	46	89	71	44	48	77	98	72	78	45	72	111	61	97	71	47	41	59	94	68	46	81	123
ATG9A	10	33	20	20	13	8	0	12	28	16	26	53	29	29	37	55	59	24	53	48	28	64	34	45	38	92	39	71	26	20	11	30	22	27	37	39	40	57	29	27
ATG9B	0	2	0	0	0	0	2	0	0	0	0	0	0	0	0	0	0	0	2	3	0	0	1	0	3	0	1	0	3	0	0	0	0	0	0	4	1	0	0	0
ATIC	116	148	67	134	105	90	61	95	106	117	57	151	112	135	166	104	150	215	151	218	268	203	204	169	136	377	150	327	219	298	259	252	125	220	216	185	115	284	263	198
ATL1	14	11	23	24	3	6	26	28	2	4	0	9	3	33	30	43	7	11	29	13	10	31	25	47	20	37	59	0	55	28	75	63	9	18	41	27	11	20	91	19
ATL2	978	817	733	992	846	819	583	672	734	1015	588	1474	1017	1018	1218	1291	1154	1264	1320	1203	1634	1479	1422	1066	1824	3135	1519	2268	1926	2503	2253	2005	1001	1250	1153	1544	1326	1372	1590	1395
ATL3	276	274	243	215	341	322	196	253	353	343	211	396	497	444	536	421	333	350	417	408	569	289	272	327	545	760	396	544	609	728	631	450	375	580	376	627	384	467	397	422
ATM	40	54	29	14	42	70	28	22	62	10	20	80	35	48	93	59	52	51	32	69	70	35	37	56	131	128	98	53	120	81	111	43	20	51	57	52	35	106	107	96
ATMIN	25	24	17	55	16	20	19	101	32	18	6	29	25	18	92	58	10	24	49	30	30	25	30	92	10	52	15	33	27	36	80	66	30	26	42	6	28	22	113	104
ATN1	2	4	0	1	1	3	0	1	0	0	1	4	10	2	3	2	0	1	5	0	4	3	2	6	2	8	2	3	9	4	5	8	1	2	4	2	7	4	5	14
ATOH1	2	0	0	0	0	0	0	0	0	0	0	1	0	0	0	0	0	1	0	0	0	0	0	0	0	0	0	1	4	15	0	0	0	0	6	0	0	11	2	0
ATOH7	5	8	7	68	7	0	2	30	4	7	13	33	8	10	67	156	16	0	10	10	0	9	7	69	0	4	2	1	7	7	84	63	0	5	0	21	4	10	44	55
ATOH8	0	0	0	0	0	0	0	0	0	0	0	0	0	0	0	0	0	0	0	0	0	0	0	0	0	0	0	0	0	0	0	0	0	0	0	0	0	0	0	0
ATOX1	5	0	1	6	4	1	2	0	6	3	4	7	7	6	14	7	0	6	2	0	1	3	9	5	4	15	1	4	4	7	15	10	5	2	1	5	14	5	17	2
ATP10A	10	31	6	26	5	17	13	56	1	3	0	1	40	32	15	16	3	3	1	2	10	7	38	14	47	49	6	8	34	21	47	39	23	37	9	39	1	23	66	37
ATP10B	1	4	5	22	12	16	16	5	8	15	19	13	10	13	13	15	30	49	16	32	25	28	34	18	6	56	4	24	8	23	10	0	31	8	21	34	15	30	19	25
ATP10D	313	337	248	326	400	404	270	262	249	293	230	464	368	425	472	423	470	467	504	521	600	458	518	375	576	1062	412	533	549	551	760	485	472	454	377	559	404	489	836	533
ATP11A	142	119	100	168	118	201	83	84	148	109	83	222	319	340	371	312	131	209	280	205	324	303	303	207	370	565	222	395	342	337	237	120	115	123	142	191	89	96	234	160
ATP11B	310	384	209	394	150	492	204	308	96	117	162	341	500	443	455	550	101	107	236	234	602	458	551	407	743	1229	620	755	706	898	639	584	539	406	651	764	462	828	572	688
ATP11C	174	142	112	112	117	160	58	124	95	95	68	159	173	146	129	113	101	158	228	186	212	65	158	135	217	373	200	268	229	318	271	198	189	235	144	232	140	160	294	244
ATP12A	8	11	4	24	13	1	11	11	13	33	6	38	40	36	55	6	23	33	22	45	34	51	32	18	19	73	11	10	23	30	57	38	7	29	31	43	48	57	91	31
ATP13A1	3	18	9	10	23	25	4	6	6	0	15	33	13	4	48	25	4	4	15	45	21	70	32	18	37	76	14	21	37	11	29	20	44	12	21	30	43	30	32	24
ATP13A2	0	0	0	3	0	0	0	2	0	0	0	0	0	1	0	0	0	0	0	0	0	3	7	1	0	0	0	1	0	0	0	0	0	3	0	0	0	0	1	0
ATP13A3	21	4	15	21	3	33	4	52	16	8	11	19	24	16	17	24	3	4	13	33	15	11	2	7	29	26	31	16	41	23	48	19	6	1	16	53	0	0	51	13
ATP13A4	0	0	0	0	0	0	0	0	0	0	0	0	0	0	0	0	0	0	0	0	0	0	0	0	0	0	0	0	0	0	0	0	0	0	0	0	0	0	0	0
ATP13A5	6	14	10	10	19	13	0	4	28	20	8	13	5	10	17	10	19	12	16	32	0	1	14	13	5	44	13	18	26	62	28	3	17	12	29	22	13	15	12	28
ATP1A1	654	562	437	538	451	557	353	483	676	823	463	1077	720	888	1049	750	764	855	1001	945	1187	900	838	740	711	1393	566	1171	1114	1182	1072	770	399	484	417	779	667	579	933	597
ATP1A2	0	0	0	0	0	0	0	0	0	0	0	0	0	0	0	0	0	0	0	0	0	3	0	0	0	0	0	0	0	0	0	0	0	0	0	0	0	6	0	0
ATP1A3	0	2	0	0	1	1	0	0	0	0	2	1	8	0	4	8	0	0	0	5	9	2	6	6	1	9	1	7	4	0	1	1	9	9	8	0	6	0	5	9
ATP1A4	0	0	0	0	0	0	0	0	0	0	0	0	0	0	0	0	0	0	0	0	0	0	0	0	0	0	0	0	0	0	0	0	0	0	0	0	0	0	0	0
ATP1B1	20	5	9	14	6	12	4	12	10	6	8	10	16	9	22	16	8	7	15	12	18	9	14	17	11	30	12	8	11	18	12	11	22	27	29	33	8	28	47	26
ATP1B2	0	0	0	0	0	0	0	0	0	0	0	0	0	0	0	1	1	0	0	0	0	1	2	0	1	0	0	0	0	0	0	0	0	0	0	0	0	1	0	0
ATP1B3	42	21	23	36	16	15	33	47	2	2	12	27	48	50	72	93	0	0	19	4	49	29	107	53	15	23	10	72	42	55	50	37	47	58	76	85	27	70	99	66
ATP1B4	0	0	0	0	0	0	0	0	0	0	0	0	0	0	0	0	0	0	0	0	0	0	0	0	0	0	0	0	0	0	0	0	0	0	0	0	0	0	0	0
ATP23	0	0	0	0	0	0	0	0	1	5	4	7	0	2	0	2	0	0	0	0	0	0	0	0	0	4	0	12	4	0	2	1	1	3	5	0	0	2	0	2
ATP2A1	0	0	0	0	0	0	0	0	0	0	0	0	0	0	0	0	0	0	0	0	2	2	0	0	0	0	0	0	0	0	0	0	0	0	0	3	0	0	11	0
ATP2A2	237	289	245	386	177	321	179	222	226	253	232	329	396	360	350	511	230	256	370	406	542	316	477	446	368	756	244	530	472	462	541	346	188	288	295	274	267	315	757	338
ATP2A3	0	0	0	0	0	0	0	0	0	0	0	0	0	0	0	0	0	0	0	0	0	0	0	0	0	0	0	0	0	8	0	0	0	0	0	0	0	0	0	0
ATP2B1	179	153	106	219	153	109	104	209	73	147	78	130	244	164	318	304	157	162	232	174	295	249	329	203	316	581	198	435	272	539	482	452	301	262	232	316	249	310	527	428
ATP2B2	0	0	0	0	0	0	0	0	0	0	0	0	0	0	0	0	0	0	0	0	0	0	0	0	0	0	0	0	0	0	0	0	0	0	0	0	0	0	0	0
ATP2B3	0	0	0	0	0	0	0	2	2	0	0	0	0	0	4	0	3	0	0	2	0	0	4	0	0	0	0	0	0	0	1	0	0	0	0	0	0	0	0	0
ATP2B4	13	19	2	35	15	12	14	16	27	35	38	63	57	36	90	46	50	30	75	38	38	83	22	35	69	48	36	54	46	66	71	56	25	20	55	75	41	45	79	53
ATP2C1	71	145	78	126	47	48	46	100	71	41	30	53	56	85	108	66	33	44	54	82	99	34	111	87	70	155	114	89	138	187	205	177	65	99	130	164	76	197	260	138
ATP2C2	67	28	21	40	10	42	20	7	6	8	6	48	24	54	36	31	9	15	15	38	35	76	87	23	60	97	13	102	42	85	49	70	45	60	95	137	86	107	144	110
ATP4A	0	0	0	0	2	0	0	0	0	0	0	0	6	0	0	0	0	0	0	0	0	0	2	0	0	0	0	0	0	0	0	0	0	0	0	7	0	0	0	0
ATP4B	0	0	0	0	0	0	0	0	0	0	0	0	0	0	0	0	0	0	0	0	0	0	0	0	0	0	0	0	0	0	0	0	0	0	0	0	0	0	0	0
ATP5F1A	635	709	530	608	530	610	345	385	550	682	352	940	573	725	880	804	658	805	851	964	1175	1037	803	690	1197	1839	718	1190	1451	1412	1558	1179	715	843	980	982	696	914	1319	1040
ATP5F1B	156	117	87	158	127	159	89	155	149	108	92	151	147	128	148	283	222	217	202	208	244	167	163	200	520	862	462	595	483	579	681	525	380	271	516	326	290	356	467	301
ATP5F1C	496	399	330	392	350	392	213	330	287	290	179	451	402	331	475	339	439	595	590	570	743	619	544	466	419	641	322	485	561	646	615	497	774	834	758	1010	761	814	1575	1078
ATP5F1D	18	9	24	18	16	4	7	14	20	26	14	32	15	20	21	38	15	27	24	22	23	16	28	9	39	23	10	22	17	23	23	15	31	34	34	38	26	23	85	58
ATP5F1E	3	2	0	3	9	2	0	5	5	6	4	22	1	4	15	10	1	3	6	9	14	6	1	4	13	8	4	3	9	6	21	10	6	1	15	1	4	11	29	7
ATP5IF1	43	22	21	31	42	27	22	16	34	30	27	83	26	48	27	43	33	43	65	53	41	36	66	41	48	48	15	45	46	38	55	33	48	37	49	88	54	47	120	65
ATP5MC1	20	14	10	24	18	24	11	20	28	17	20	23	23	38	26	15	12	28	33	23	7	19	23	20	43	71	16	38	46	67	76	55	46	56	38	52	47	39	136	43
ATP5MC2	10	16	14	20	18	10	5	7	13	10	4	24	10	37	19	26	16	18	23	5	19	23	14	16	25	10	17	10	15	20	29	25	16	30	7	26	14	29	62	29
ATP5MC3	175	73	80	114	83	112	81	89	107	105	79	133	128	117	139	124	122	131	162	160	215	156	193	124	161	314	136	222	182	265	257	223	147	144	137	157	140	148	387	194
ATP5MD	12	6	3	11	8	6	4	5	17	15	17	20	22	7	22	21	16	4	11	18	20	17	11	12	21	20	14	18	18	26	22	17	20	23	24	18	19	17	42	33
ATP5ME	4	1	4	3	2	2	2	4	6	1	3	8	4	3	8	7	4	1	8	6	3	3	10	3	4	6	13	3	3	3	11	4	4	3	3	5	3	2	11	8
ATP5MF	5	10	5	7	1	4	3	4	8	11	10	9	9	10	11	12	9	16	7	16	9	10	11	8	5	4	8	3	4	6	11	8	8	6	3	5	8	11	20	2
ATP5MG	53	36	28	47	31	32	33	25	28	20	12	44	34	40	33	28	34	35	40	57	64	44	51	30	54	81	41	38	68	85	85	74	66	64	48	82	60	70	143	69
ATP5MPL	5	2	0	0	0	0	0	0	3	2	4	4	3	4	7	2	2	2	1	0	3	2	6	1	1	5	0	0	2	5	4	4	1	3	1	5	1	4	9	8
ATP5PB	347	279	181	290	251	347	188	190	192	249	135	305	267	210	294	260	315	331	401	359	508	383	285	283	356	694	312	429	450	561	602	380	333	481	509	528	395	469	678	499
ATP5PD	8	0	6	8	5	7	4	6	17	19	15	22	14	22	30	15	8	8	26	2	13	13	18	16	19	28	11	24	14	12	28	42	13	16	11	7	13	11	25	17
ATP5PF	366	336	279	349	259	285	178	243	228	250	226	292	290	301	380	323	320	329	419	431	579	418	494	358	428	567	240	434	517	517	605	429	476	389	509	545	451	504	1024	505
ATP5PO	36	17	13	25	20	27	17	21	60	48	24	47	14	72	77	34	40	41	38	44	76	45	67	55	57	84	29	80	58	57	108	74	34	27	31	36	30	39	105	29
ATP5S	34	57	31	42	29	62	23	23	22	52	30	76	60	52	42	83	72	62	107	61	66	83	83	46	60	84	30	17	43	60	43	38	69	48	65	133	81	57	68	100
ATP6AP1	38	44	38	47	57	46	22	17	8	11	7	19	47	26	29	34	10	21	36	31	57	40	55	50	35	15	20	19	25	45	25	19	17	20	22	57	38	27	12	18
ATP6AP1L	7	0	4	1	1	3	0	1	0	0	0	0	2	0	6	0	3	5	0	0	5	3	3	0	0	0	12	0	0	0	6	0	2	0	0	12	3	0	8	0
ATP6AP2	174	138	159	186	186	262	161	125	251	272	177	408	323	398	365	387	224	349	391	337	394	380	272	281	388	690	378	472	580	466	711	539	274	285	267	339	268	362	508	242
ATP6V0A1	126	197	172	195	187	167	102	155	132	130	82	199	152	173	178	156	218	174	333	254	265	189	394	188	317	565	293	521	292	533	338	308	129	191	202	243	239	301	191	211
ATP6V0A2	27	66	79	87	13	46	65	84	21	17	18	3	34	135	185	148	13	15	4	13	4	42	207	114	72	216	110	100	284	227	266	243	114	97	82	123	154	125	97	93
ATP6V0A4	5	14	2	18	14	20	4	17	5	12	9	29	29	12	19	41	22	4	24	12	39	20	19	29	4	63	5	59	9	59	57	10	8	21	34	39	12	53	71	60
ATP6V0B	59	41	39	40	40	42	25	39	55	25	28	53	29	75	66	71	45	69	31	54	83	44	42	40	82	178	64	125	58	157	83	92	57	76	68	103	82	83	125	128
ATP6V0C	52	47	49	60	41	50	26	40	56	63	52	103	76	93	59	89	27	48	70	87	93	54	86	42	47	106	33	51	70	62	88	55	52	72	64	64	68	73	174	105
ATP6V0D1	77	66	49	65	106	76	75	44	98	80	66	130	128	108	140	190	90	105	124	136	148	75	133	119	151	217	111	169	151	136	177	170	93	128	217	173	147	196	252	236
ATP6V0D2	0	0	0	0	0	6	0	0	0	0	0	3	0	0	0	0	0	0	0	0	0	0	0	0	0	21	0	0	0	9	0	0	0	0	0	0	0	0	0	0
ATP6V0E1	167	103	85	124	107	118	56	90	81	139	60	153	110	82	132	132	130	179	163	200	201	133	176	109	109	195	104	121	110	230	211	88	123	151	175	245	138	150	417	252
ATP6V0E2	0	1	1	0	1	3	2	1	0	0	2	2	0	1	0	0	12	7	0	3	8	0	15	6	0	0	0	9	11	0	0	0	9	1	5	10	0	3	0	0
ATP6V1A	67	52	25	56	45	80	26	47	90	47	55	100	68	88	118	124	25	48	53	46	97	15	39	17	126	86	81	115	162	119	121	121	54	89	49	93	87	124	153	65
ATP6V1B1	9	19	16	31	1	6	9	2	14	23	24	57	74	54	21	47	24	47	53	56	72	32	72	25	67	76	49	25	39	31	76	75	30	35	13	19	45	31	41	30
ATP6V1B2	1223	1239	844	1140	878	1199	634	746	698	933	515	1309	1117	1154	1302	1430	1121	1240	1544	1789	1809	1628	1290	1082	1473	1807	1028	1838	1776	1701	1811	1345	1433	1633	1679	2418	1824	1690	1944	1984
ATP6V1C1	813	731	736	713	584	661	469	591	457	542	345	715	631	715	788	770	628	742	932	800	991	1101	929	749	1345	1821	1086	1306	1484	1741	1668	1191	1153	1307	1297	1815	1198	1617	1623	1639
ATP6V1C2	6	5	8	6	2	6	7	2	3	7	6	6	13	2	15	5	1	4	2	6	6	5	6	3	6	5	4	3	6	12	3	2	2	11	6	18	14	5	38	12
ATP6V1D	8	7	18	15	18	4	8	7	6	2	6	17	0	12	0	6	11	10	20	13	9	8	0	14	9	6	18	14	23	24	18	0	10	14	6	27	16	23	34	17
ATP6V1E1	132	128	82	101	92	88	51	62	36	56	29	110	49	66	85	93	184	129	144	185	200	133	175	126	49	90	31	96	90	76	72	75	132	112	115	232	189	104	381	170
ATP6V1E2	0	0	0	0	0	0	0	0	0	0	0	0	0	0	0	0	0	0	0	0	0	0	0	0	0	0	0	0	0	0	0	0	0	0	5	0	2	5	0	6
ATP6V1F	15	17	15	9	16	8	4	11	42	28	7	44	24	26	40	61	23	22	15	28	27	29	17	20	42	63	16	41	46	40	41	25	13	14	15	25	25	23	24	13
ATP6V1FNB	0	1	2	1	0	0	0	0	0	1	0	1	0	3	0	1	1	3	4	0	1	0	0	2	1	1	0	0	0	0	2	0	0	0	1	1	0	0	1	0
ATP6V1G1	366	305	245	317	237	218	221	221	245	356	244	441	304	455	419	447	292	348	394	356	477	338	301	309	465	913	398	592	628	705	751	587	384	476	498	577	504	479	914	695
ATP6V1G2	0	0	0	0	0	0	2	0	0	0	0	1	0	0	0	0	0	2	0	0	0	1	0	0	4	2	0	0	0	0	0	0	0	0	0	0	0	0	0	0
ATP6V1G3	0	0	0	0	0	0	0	0	0	0	0	0	0	0	0	0	0	0	0	0	0	0	0	0	0	1	0	0	0	0	0	0	1	0	2	0	0	0	0	1
ATP6V1H	180	140	143	209	119	204	85	121	115	147	72	195	149	137	254	156	164	218	208	165	361	243	222	146	194	419	184	335	327	254	269	189	266	235	217	227	178	215	270	247
ATP7A	16	33	13	21	49	12	8	21	16	24	5	73	73	11	17	6	27	20	37	17	49	0	7	30	18	45	9	0	39	39	12	27	10	32	21	43	9	97	66	31
ATP7B	21	13	7	11	8	27	9	11	13	0	0	45	20	16	22	19	11	22	30	23	18	55	30	17	3	41	23	41	22	49	4	18	29	3	10	21	12	0	32	17
ATP8A1	38	39	27	51	13	53	25	25	15	28	26	46	37	105	132	117	21	18	52	25	63	61	97	35	86	65	56	102	96	177	136	144	61	34	59	96	44	103	55	107
ATP8A2	0	0	0	0	0	3	0	0	0	0	0	0	0	0	0	0	0	0	0	0	0	0	0	0	0	0	0	1	1	0	0	1	4	0	0	0	0	0	0	2
ATP8B1	73	52	33	38	38	57	40	26	69	64	42	76	61	77	69	113	36	72	86	69	115	95	31	66	82	46	40	67	55	95	66	50	79	73	76	49	75	92	134	109
ATP8B2	0	5	4	3	1	2	0	5	0	0	1	0	0	0	7	7	1	0	1	1	5	6	6	31	10	3	1	10	12	14	0	6	16	3	5	1	4	0	28	4
ATP8B3	1	0	2	0	0	0	0	0	2	0	0	0	0	0	1	0	2	3	0	0	0	0	0	0	0	0	0	0	0	0	0	3	0	0	0	0	0	1	11	2
ATP8B4	20	32	24	28	34	37	23	13	22	21	10	44	14	38	8	18	47	72	70	49	79	74	61	46	57	68	53	82	35	19	60	29	55	46	90	93	99	84	125	70
ATP9A	56	57	47	57	37	66	32	70	26	28	27	31	54	41	41	55	42	75	53	70	35	56	105	28	79	149	50	78	73	77	64	70	23	68	37	84	50	136	72	91
ATP9B	26	17	22	22	26	23	13	15	22	26	11	44	24	33	22	21	32	32	59	41	57	43	42	38	7	66	16	31	15	40	45	23	29	35	25	57	22	64	50	24
ATPAF1	52	42	93	111	22	25	96	106	1	20	7	43	10	42	170	198	15	7	45	25	13	15	149	181	29	76	18	34	43	194	280	189	23	68	79	104	24	211	208	291
ATPAF2	15	22	23	21	31	25	12	37	18	49	20	40	51	34	27	42	26	34	33	31	38	19	24	37	31	26	40	46	39	75	42	35	44	45	40	86	55	71	67	56
ATR	11	16	4	17	3	12	5	7	45	40	8	48	30	41	38	45	1	26	8	36	14	13	12	13	9	15	30	117	66	29	45	34	12	5	47	27	0	24	31	15
ATRAID	106	81	66	53	87	77	53	56	90	133	81	129	181	134	123	187	81	97	95	120	139	106	106	58	260	402	195	316	292	251	367	234	80	127	139	150	108	145	259	141
ATRIP	24	43	26	49	9	41	17	22	25	24	23	24	4	36	34	32	53	38	45	22	30	43	48	39	11	2	20	26	13	47	17	31	26	33	40	51	37	53	49	49
ATRN	50	15	13	12	4	53	24	17	2	24	2	53	18	38	54	20	15	10	7	24	55	52	39	31	76	63	24	154	50	55	24	37	55	20	33	79	55	42	105	47
ATRNL1	9	5	11	0	0	0	6	8	6	7	5	9	14	0	13	7	0	4	12	4	0	4	4	4	0	19	14	3	10	13	9	3	5	24	8	0	0	13	17	0
ATRX	348	406	262	334	386	290	227	281	481	495	335	854	853	653	772	937	426	470	476	446	478	388	375	310	1063	1784	959	1329	1048	1492	1268	1337	469	596	408	479	320	427	730	352
ATXN1	43	59	59	96	8	26	49	46	8	13	14	22	33	98	95	100	16	14	12	8	44	85	179	103	34	136	54	108	89	90	102	56	79	86	58	108	63	86	104	94
ATXN10	9	21	25	134	5	25	34	114	8	21	0	23	2	23	104	195	6	23	3	14	6	14	8	106	9	49	4	17	48	64	218	226	9	34	22	69	20	11	146	213
ATXN1L	23	53	54	74	23	49	23	43	21	18	36	57	69	88	55	49	21	51	78	84	105	93	80	39	99	111	62	129	77	78	48	46	25	35	72	76	46	88	126	81
ATXN2	91	71	81	123	83	100	60	103	98	72	38	119	92	112	91	153	65	68	133	84	156	75	124	163	102	207	92	118	159	173	149	198	107	53	133	98	33	112	218	110
ATXN2L	55	111	61	110	18	77	61	45	33	42	32	86	200	177	173	215	8	11	45	25	130	101	153	88	208	399	119	185	197	278	217	179	59	69	80	78	53	81	222	102
ATXN3	133	151	85	129	115	109	114	67	84	186	113	298	164	157	237	183	123	246	135	223	304	196	145	145	261	506	188	272	338	339	312	306	139	200	187	217	55	239	291	154
ATXN7	33	55	69	67	16	66	41	33	27	27	29	34	76	64	98	91	41	60	37	12	122	91	134	77	80	121	50	65	93	140	94	34	44	38	36	63	75	72	82	100
ATXN7L1	690	919	574	819	772	848	495	539	822	950	511	1226	987	1200	1284	1218	990	968	1255	1082	1258	1205	863	650	964	2301	807	1137	1176	1226	1111	873	630	625	686	1324	884	992	1019	901
ATXN7L2	63	122	95	152	69.82	79.69	92.54	78.01	79.01	92.06	50.25	90.06	61	136	151.79	144.05	88	134.56	127.05	159.34	218.13	191.31	226.36	149.66	91.16	120	60	130.07	104.46	86.25	123.52	94.05	104.02	134.73	129.01	261.11	129.07	180.09	186	156.75
ATXN7L3	0	0	0	0	0	0	3	1	0	0	0	1	0	0	0	0	0	0	0	0	0	0	1	1	0	7	0	0	0	0	0	4	0	0	2	0	3	0	0	0
ATXN7L3B	71	98	50	59	81	116	36	67	112	88	63	224	93	174	146	147	168	150	194	108	207	260	212	84	175	283	73	184	146	169	220	169	208	199	270	262	281	337	339	285
AUH	35	9	24	39	31	23	15	28	27	27	12	17	19	32	32	70	32	29	47	60	76	51	29	26	31	6	30	50	52	18	32	24	31	41	39	44	46	40	62	58
AUNIP	227	156	137	238	142	173	115	147	170	231	113	254	202	267	269	174	181	244	331	364	354	263	261	209	169	297	115	168	234	269	289	100	230	218	163	316	230	214	414	246
AUP1	0	0	0	3	0	1	0	2	0	0	2	8	8	3	0	8	0	0	0	0	6	0	0	5	4	0	7	0	0	7	6	0	1	0	11	0	4	4	0	4
AURKA	19607	17173	12883	16306	14088	17204	10485	13063	11428	14023	8333	20000	16841	16464	20370	19653	18280	20509	24106	24026	29804	23784	24002	19023	17217	23839	11811	18850	21672	20917	24198	15081	21745	21076	23999	34361	26497	28028	36714	30015
AURKAIP1	6	11	3	9	17	13	4	11	6	16	5	13	6	11	13	11	19	14	12	10	11	9	9	7	16	13	7	15	14	7	28	10	7	13	8	25	4	19	23	25
AURKB	390	270	201	364	270	277	239	227	248	216	133	278	320	291	320	283	337	295	314	463	578	337	459	364	358	448	166	214	246	327	347	286	420	349	355	452	275	372	480	439
AURKC	1238	1028	809	1026	844	936	718	922	668	842	518	1127	896	905	1032	1384	1109	1166	1378	1389	1741	1325	1390	1118	1474	2756	1264	2163	1875	2120	2272	1757	1432	1782	1888	2213	1918	2236	3338	2206
AUTS2	4	1	4	14	1	2	3	9	22	10	1	2	0	3	21	5	2	11	1	4	7	10	8	11	4	18	0	14	11	6	15	27	19	13	12	10	10	5	35	6
AVEN	95	86	53	72	60	66	58	73	84	120	33	85	60	133	116	172	106	108	121	146	177	151	144	117	107	140	76	54	103	154	163	62	137	168	181	222	185	131	269	220
AVIL	0	0	0	0	0	5	0	0	20	2	0	5	0	0	0	0	8	0	4	0	10	20	0	9	12	13	0	1	0	0	2	0	0	0	0	0	0	0	0	12
AVL9	151	161	72	149	141	157	123	110	49	99	53	205	154	210	115	130	82	146	198	124	125	127	144	88	242	461	185	217	324	145	276	190	207	219	187	250	190	259	276	287
AVP	0	0	0	0	0	0	0	0	0	0	0	0	0	0	0	0	0	0	0	0	0	0	0	0	0	0	0	0	0	0	0	0	0	0	0	0	0	0	0	0
AVPI1	9	4	4	7	4	11	9	7	4	4	6	12	21	8	11	9	19	11	11	4	13	13	7	8	5	14	3	17	17	10	12	7	7	9	19	6	23	10	22	9
AVPR1A	0	0	0	0	0	0	0	0	0	0	0	0	0	0	0	0	0	0	0	0	0	0	0	0	0	19	0	7	13	0	2	8	1	0	4	12	0	0	0	0
AVPR1B	5	4	5	2	1	2	5	8	0	0	1	6	1	2	3	6	0	3	5	6	9	2	8	4	0	9	1	0	0	0	3	0	6	6	6	11	11	10	7	2
AVPR2	0	0	0	0	0	0	0	0	0	0	0	0	0	0	0	0	0	0	0	0	0	0	0	0	0	0	0	0	0	0	0	0	0	0	0	0	0	0	0	0
AWAT1	0	0	0	0	0	0	0	0	0	0	0	0	0	0	0	0	0	0	0	0	0	0	0	0	0	0	0	0	0	0	0	2	0	0	0	0	0	0	0	0
AWAT2	0	0	0	0	0	0	0	0	0	0	0	0	0	0	0	0	0	0	0	0	0	0	0	0	0	0	0	0	0	0	0	0	0	0	0	0	0	0	0	0
AXDND1	61	78	45	70	55	59	36	29	78	116	49	113	119	90	127	96	105	62	72	73	149	75	53	77	166	214	70	125	115	125	216	119	109	90	72	81	82	180	125	84
AXIN1	39	14	30	35	3	13	11	34	4	5	3	7	14	21	28	28	12	7	3	17	20	51	47	30	48	11	13	90	35	60	48	47	43	30	14	59	37	56	67	36
AXIN2	13	31	15	23	3	19	10	34	6	4	4	2	16	45	13	35	0	0	7	16	33	22	30	18	3	36	3	13	24	48	25	30	23	19	28	39	19	17	29	19
AXL	0	0	0	0	0	0	1	0	0	0	0	0	0	0	0	0	0	0	0	0	0	0	0	0	0	0	0	0	0	0	0	0	0	0	0	0	0	0	1	0
AZGP1	1	0	1	0	0	0	4	0	0	0	0	0	0	0	0	0	0	2	4	0	0	0	0	0	0	1	0	0	6	0	2	2	3	4	4	0	6	0	3	3
AZI2	125	151	91	138	59	154	71	93	17	71	16	86	109	145	170	216	46	66	92	99	250	228	180	112	210	254	147	240	213	172	252	192	255	229	326	262	231	234	352	270
AZIN1	416	437	255	360	321	374	274	281	303	283	148	433	311	269	373	533	388	384	514	283	470	455	493	299	519	747	417	577	453	703	595	567	397	387	607	739	457	540	655	538
AZIN2	62	64	78	97	57	63	42	60	58	41	33	49	71	77	77	85	34	44	63	94	118	64	78	63	105	137	85	159	81	139	118	89	90	76	81	93	113	138	118	93
AZU1	3	2	2	2	2	0	0	0	2	1	1	2	4	5	1	8	1	7	3	7	4	2	4	5	6	3	4	0	6	5	0	4	2	2	6	6	4	3	6	5
ApoN	0	0	0	0	0	0	0	0	0	0	0	0	0	0	0	0	0	0	0	0	0	0	0	0	0	0	0	0	0	0	0	0	0	0	0	0	0	0	0	0
B2M	41	39	30	49	54	37	17	36	57	57	31	59	26	43	79	91	104	80	82	69	74	89	124	68	140	215	78	132	149	144	191	189	146	101	159	138	157	164	249	222
B3GALNT1	11	7	0	3	0	0	0	0	2	0	1	1	0	4	4	0	0	5	1	5	3	7	1	6	10	22	5	4	0	0	0	0	0	14	0	19	7	0	0	5
B3GALNT2	316	357	283	453	270	324	300	348	163	325	184	311	274	375	498	691	233	246	235	301	409	287	333	311	421	771	404	670	602	929	766	828	430	553	596	776	616	739	802	577
B3GALT1	22	6	23	25	3	20	32	24	11	8	2	33	26	29	16	22	21	11	29	18	15	23	33	21	14	29	23	22	16	51	26	0	52	18	16	88	23	38	9	19
B3GALT2	0	0	0	0	0	0	0	0	0	0	0	0	0	0	0	0	0	0	0	0	0	0	0	0	0	0	0	0	0	0	0	0	0	0	0	0	0	0	0	0
B3GALT4	4	7	0	0	0	0	0	4	0	0	0	0	0	0	1	0	0	0	0	0	0	6	4	0	0	8	0	1	1	0	0	4	3	5	2	1	1	0	0	3
B3GALT5	0	0	0	0	0	0	0	0	0	0	0	0	0	0	0	0	0	0	0	0	0	0	0	0	0	0	0	0	0	0	0	0	0	0	0	0	0	0	0	0
B3GALT6	8	2	10	10	3	6	5	9	5	1	2	5	0	5	10	8	1	0	2	12	16	0	1	7	5	8	6	0	12	5	17	12	0	4	5	3	7	0	27	17
B3GAT1	0	0	0	0	0	0	0	0	0	0	0	0	0	0	0	0	0	0	0	0	0	0	0	0	0	0	0	0	0	0	0	0	0	0	0	0	0	0	0	0
B3GAT2	0	0	0	0	0	0	0	0	0	0	0	0	0	0	1	0	0	0	0	0	0	0	0	0	0	0	0	0	0	0	0	0	0	0	0	0	1	0	0	0
B3GAT3	0	0	0	0	0	1	1	2	0	0	0	1	0	0	1	0	0	2	1	0	1	4	2	0	4	2	0	1	6	3	3	6	1	0	5	5	0	0	2	14
B3GNT2	0	4	7	32	5	4	4	26	0	0	1	7	23	12	6	41	0	0	0	4	0	11	6	19	23	48	17	13	31	57	9	15	1	15	38	14	3	29	24	15
B3GNT3	107	113	111	126	123	124	77	120	98	107	69	162	178	234	192	167	169	190	243	219	315	152	210	138	224	197	105	188	130	102	129	116	163	149	153	248	245	178	330	256
B3GNT4	15	16	12	10	15	21	15	12	9	34	17	25	52	22	24	29	9	22	37	32	14	39	25	15	53	56	19	48	49	54	31	44	23	46	47	23	58	50	63	49
B3GNT5	0	0	1	5	0	1	0	0	0	0	0	1	0	2	17	0	0	1	2	13	0	2	13	0	0	17	0	0	10	2	3	3	2	4	2	13	1	9	32	3
B3GNT6	0	0	0	0	0	0	0	0	0	0	0	0	0	0	0	0	0	0	0	1	0	0	0	1	0	0	0	0	0	0	0	0	0	0	0	0	0	0	0	0
B3GNT7	0	0	0	0	0	0	0	0	0	0	0	0	0	0	0	0	0	0	0	0	0	0	0	0	0	0	0	0	0	0	0	0	0	0	0	0	0	0	0	0
B3GNT8	0	0	0	0	0	0	0	0	0	0	0	0	0	0	0	0	0	0	0	0	0	0	0	0	0	0	0	0	0	0	0	0	0	0	0	0	0	0	0	0
B3GNT9	20	21	23	25	35	13	17	16	25	32	8	10	8	21	25	13	33	36	39	44	34	31	27	36	20	14	0	21	24	19	28	21	12	15	7	28	27	19	22	34
B3GNTL1	10	6	18	7	8	9	7	7	10	5	5	17	20	18	11	31	19	5	18	24	27	22	41	28	22	19	16	25	9	27	10	13	12	9	10	37	17	8	25	6
B4GALNT1	0	0	2	0	2	0	0	0	2	5	1	0	0	5	0	0	2	2	8	2	0	5	2	3	1	0	0	3	4	0	0	0	7	2	0	0	3	0	6	0
B4GALNT2	0	0	0	0	0	0	0	0	0	0	0	0	0	0	0	0	0	0	0	0	0	0	0	1	0	0	0	0	0	0	0	0	0	0	0	0	0	0	0	0
B4GALNT3	1	1	2	0	0	8	2	0	0	6	1	0	5	3	1	7	5	1	3	2	1	8	5	10	1	2	14	2	5	4	4	6	4	2	3	4	6	8	8	2
B4GALNT4	0	0	1	0	0	0	1	0	0	0	0	0	0	0	0	0	0	0	0	0	0	0	0	0	0	0	0	0	0	1	0	0	0	0	0	0	0	0	0	3
B4GALT1	13	8	13	2	17	10	3	11	16	16	14	55	32	53	46	41	1	0	13	19	13	22	18	12	49	78	22	43	43	49	59	70	20	25	9	23	34	2	11	4
B4GALT2	0	0	1	4	0	3	9	12	2	0	1	0	0	0	2	16	0	4	0	0	18	0	4	8	1	0	0	0	2	2	0	0	0	0	2	2	0	1	10	6
B4GALT3	106	71	65	71	103	116	61	102	123	79	33	151	72	113	135	166	147	117	188	104	175	181	162	117	222	346	149	412	240	438	248	277	214	262	347	360	384	345	394	300
B4GALT4	155	123	43	86	69	87	92	73	44	62	48	94	46	75	103	96	74	113	138	182	139	120	154	110	113	184	67	84	106	97	104	66	165	249	255	346	264	215	442	294
B4GALT5	230	226	170	228	234	232	182	167	169	159	136	228	168	226	222	235	283	407	360	313	478	184	349	293	141	341	143	235	247	235	334	153	68	119	93	184	123	88	207	121
B4GALT6	56	58	42	106	30	66	68	69	62	109	46	93	33	80	86	83	72	82	84	83	91	72	123	96	43	73	36	73	77	115	76	67	50	78	190	162	46	65	208	116
B4GALT7	3	0	2	2	1	3	6	3	1	7	3	3	1	2	2	8	3	0	10	3	7	3	9	1	2	3	4	7	2	2	1	0	8	4	1	4	1	10	12	3
B4GAT1	0	11	3	3	4	4	1	9	2	11	6	1	0	4	9	0	9	17	0	8	6	6	9	10	14	0	5	15	16	19	20	11	11	13	11	24	24	29	2	23
B9D1	1	0	4	0	1	8	0	0	0	3	0	0	0	4	3	9	1	1	0	0	1	0	5	0	1	0	0	6	0	3	6	0	0	0	4	0	5	0	7	1
B9D2	0	1	2	8	1	0	2	2	0	5	0	1	0	0	2	5	3	2	4	4	5	2	5	5	4	16	11	0	4	5	6	0	0	5	0	0	2	1	14	10
BAALC	0	0	0	0	2	0	0	0	0	0	0	0	0	0	5	0	10	0	0	0	0	0	0	1	0	0	4	1	0	7	5	1	6	0	7	0	0	0	0	0
BAAT	0	0	0	0	0	0	0	2	0	6	1	0	2	0	0	0	0	0	0	9	0	3	0	1	0	0	0	4	3	0	0	0	3	0	0	0	0	0	0	0
BABAM1	96	87	61	92	78	93	69	92	77	95	56	121	133	80	136	140	113	122	150	164	125	160	139	102	106	296	105	141	126	123	167	139	158	136	137	212	139	124	265	159
BABAM2	35	39	19	26	40	26	17	11	10	18	10	25	38	39	40	33	29	31	33	35	34	22	57	47	15	88	41	13	34	55	47	28	37	33	33	44	44	43	61	69
BACE1	7	19	9	6	10	4	6	3	5	40	2	15	6	20	16	20	7	8	6	19	16	27	1	8	37	37	4	10	13	13	23	16	7	5	18	6	1	13	22	9
BACE2	22	1	4	12	7	6	8	8	4	9	1	16	2	0	6	7	7	18	7	0	6	3	8	4	15	35	17	13	17	41	14	25	4	9	7	10	0	4	45	17
BACH1	93	54	60	66	20	102	32	58	20	20	24	42	165	139	88	77	4	5	12	14	98	32	128	37	120	207	180	160	157	122	189	161	73	79	60	94	137	82	127	120
BACH2	0	0	0	2	0	0	0	0	0	0	0	2	7	1	0	0	3	0	1	0	2	0	4	0	0	0	0	0	0	0	0	0	0	0	0	0	5	0	0	0
BAD	9	5	5	7	7	7	3	3	5	3	2	5	5	12	13	3	5	9	6	7	11	8	10	10	5	4	6	10	7	4	11	9	15	7	14	14	15	16	18	8
BAG1	9	22	15	105	19	27	20	83	7	1	7	28	31	9	49	82	24	22	12	23	9	32	39	45	48	15	0	0	10	30	163	107	59	45	41	50	39	55	109	80
BAG2	74	108	130	164	54	129	101	142	15	15	46	97	163	128	228	176	29	17	73	97	199	179	222	164	226	259	140	252	325	420	297	340	154	173	204	373	130	247	401	293
BAG3	35	57	41	20	5	15	26	20	11	4	1	0	41	49	52	92	5	8	1	9	25	52	71	33	21	39	36	63	61	41	70	49	47	78	47	80	70	45	116	88
BAG4	78	50	54	71	94	107	40	65	25	46	19	74	34	36	66	64	83	110	66	116	82	74	85	93	54	136	32	106	90	35	62	54	70	96	44	99	43	95	73	102
BAG5	9	3	5	6	2	7	4	16	0	0	11	3	10	7	17	19	0	0	1	9	25	0	11	6	16	0	9	16	13	0	14	16	5	12	15	18	31	10	13	0
BAG6	40	50	43	49	35	43	18	40	40	46	23	64	72	43	63	84	60	96	82	62	72	82	115	59	77	68	30	62	69	78	52	73	44	51	56	94	55	62	75	86
BAHCC1	0	0	0	0	0	0	0	0	0	0	0	0	0	0	1	0	1	1	0	0	0	0	0	0	0	0	0	0	0	0	0	0	0	0	0	0	0	0	1	0
BAHD1	9	10	9	9	5	5	4	6	2	3	1	7	6	4	15	1	2	6	0	13	8	5	4	8	7	15	24	2	10	7	5	2	2	0	0	3	12	3	0	0
BAIAP2	391	364	292	404	360	404	234	234	416	464	235	522	446	577	560	614	449	576	519	566	681	430	576	475	400	588	304	555	466	472	500	279	382	424	443	832	516	530	702	572
BAIAP2L1	117	358	330	420	15	79	259	325	36	75	11	41	36	334	646	756	21	16	45	64	67	335	564	436	108	335	220	415	657	618	703	474	409	457	537	932	598	808	882	787
BAIAP2L2	16	11	5	12	0	9	11	3	2	5	3	0	12	6	10	16	0	0	4	2	5	7	5	4	10	33	8	3	11	23	27	17	18	6	11	7	11	2	20	12
BAK1	3	13	5	15	4	6	2	11	5	0	5	20	8	4	5	5	7	6	7	9	16	11	3	4	5	5	1	8	4	12	8	0	5	11	9	1	17	7	4	5
BAMBI	11	21	4	4	2	9	5	4	1	0	2	2	17	20	9	20	0	0	6	0	15	5	7	12	26	32	3	0	20	26	15	31	4	12	26	10	3	9	32	12
BANF1	782	635	531	680	572	598	442	483	575	557	319	755	692	635	813	882	564	750	966	865	1112	711	817	697	1204	2244	752	1549	1380	1597	1663	1365	859	979	1190	1336	1018	1135	2297	1227
BANF2	0	0	0	0	0	0	0	0	0	0	0	0	0	0	0	0	0	0	0	0	0	0	0	0	0	0	0	0	0	0	0	0	0	0	0	0	0	0	0	0
BANK1	0	0	0	0	0	0	0	0	0	0	1	0	0	0	0	0	0	0	3	0	0	0	0	0	0	0	0	0	0	0	0	0	0	0	0	0	0	0	0	0
BANP	267	266	176	277	191	293	151	177	335	390	171	461	532	425	448	508	296	353	412	407	519	360	418	263	426	826	238	478	488	509	541	348	364	384	325	495	313	475	587	382
BAP1	8	36	23	21	16	13	9	20	28	16	13	16	5	41	32	18	26	64	58	47	28	60	31	22	20	62	27	57	43	89	34	27	23	11	14	39	12	18	17	23
BARD1	40	50	10	47	30	24	18	26	2	29	27	54	88	71	87	69	15	22	31	17	36	41	29	18	94	102	47	56	103	58	141	105	24	38	21	16	22	27	47	39
BARHL1	0	0	0	0	0	0	0	0	0	0	0	0	0	0	0	0	0	0	0	0	0	0	0	0	0	0	0	0	0	0	0	0	0	0	0	0	0	0	0	0
BARHL2	0	22	18	13	0	4	7	13	0	0	0	1	8	4	18	46	1	0	1	0	5	4	21	8	7	6	9	11	15	21	38	20	0	4	7	24	14	11	27	28
BARX1	2	2	1	2	2	1	4	5	0	0	0	2	0	4	12	15	0	2	2	4	7	2	0	5	0	7	4	7	3	6	11	18	4	8	0	8	10	2	28	5
BARX2	24	12	28	18	9	25	14	20	6	17	1	23	5	17	14	33	11	12	18	16	20	23	14	18	37	67	21	44	36	47	34	38	16	34	29	30	11	27	16	46
BASP1	106	187	107	287	11	99	120	139	5	5	3	13	44	77	98	117	11	10	10	10	35	156	146	131	80	111	40	92	108	152	97	77	102	84	163	200	179	139	133	191
BATF	0	0	0	0	0	0	0	0	0	0	0	0	0	0	0	1	0	0	0	0	2	0	0	0	0	0	0	0	0	0	0	0	1	0	0	1	0	3	2	1
BATF2	0	0	0	0	0	0	0	0	0	0	0	0	0	0	0	0	0	0	0	0	0	0	0	0	0	0	0	0	0	0	3	0	0	0	0	0	0	0	0	0
BATF3	0	0	0	0	0	0	0	0	0	0	0	0	0	0	0	0	0	0	0	0	0	0	0	0	0	0	0	0	0	0	0	0	0	0	0	0	0	0	0	0
BAX	10	9	11	5	4	5	8	0	11	4	5	5	9	12	7	24	5	8	11	2	8	13	8	9	20	31	12	17	23	21	5	5	8	11	8	12	2	9	19	11
BAZ1A	174	133	129	118	103	125	104	104	46	60	112	229	206	157	195	280	31	53	89	105	189	200	182	120	246	389	212	199	273	512	428	366	114	107	132	175	139	170	390	240
BAZ1B	190	225	130	215	159	218	87	162	93	55	66	196	218	160	181	226	107	119	233	269	285	198	195	128	351	418	221	296	315	292	332	255	154	111	168	145	117	151	271	248
BAZ2A	284	126	149	205	114	139	74	126	111	114	65	129	68	172	202	168	206	164	175	192	254	265	104	156	276	348	159	248	188	143	187	176	174	199	153	247	178	193	278	316
BAZ2B	39	21	44	20	45	34	41	37	27	50	25	90	19	63	44	89	47	73	69	57	94	47	78	89	74	324	52	96	101	149	108	67	38	76	146	139	143	46	130	88
BBC3	0	0	1	0	0	0	0	0	0	0	0	0	0	0	0	0	0	0	1	4	0	1	0	0	0	0	0	0	0	0	0	0	0	0	0	0	0	0	3	0
BBIP1	41	37	10	21	18	12	16	28	20	15	15	22	24	14	28	13	11	25	18	14	32	27	18	22	0	57	36	35	48	36	31	34	34	34	36	52	66	43	45	115
BBOF1	0	0	4	6	2	0	0	0	0	0	0	0	12	1	0	0	1	0	5	11	0	0	5	0	0	0	0	0	1	0	0	0	0	1	20	31	0	0	25	13
BBOX1	0	0	0	0	0	0	0	0	0	0	0	0	0	0	0	0	0	0	0	0	0	0	0	0	0	0	0	0	0	0	0	0	0	0	0	0	0	0	0	0
BBS1	0	0	2	0	0	0	0	0	0	0	4	0	0	0	1	0	0	4	3	0	0	0	0	0	0	0	0	0	0	0	7	6	0	0	0	0	0	0	0	0
BBS10	8	0	1	2	2	0	0	0	0	0	1	4	0	0	2	0	6	0	0	0	0	4	10	0	0	0	0	0	9	6	0	0	0	0	0	1	0	0	11	0
BBS12	96	73	56	55	51	60	53	61	57	49	72	111	54	117	89	106	73	56	69	127	175	79	110	81	157	392	102	163	201	110	254	175	66	107	99	210	80	58	70	117
BBS2	599	640	503	684	457	564	485	454	434	583	432	894	535	574	853	641	452	587	737	710	834	697	750	528	1131	1511	745	1278	996	1183	1170	862	588	662	641	965	798	790	1087	866
BBS4	245	205	159	215	144	236	102	186	92	72	55	153	118	146	77	180	177	207	302	237	340	258	288	204	168	250	80	126	167	134	279	156	265	290	202	394	238	338	520	418
BBS5	113	100	99	140	111	94	75	68	114	76	52	189	134	150	189	129	127	173	161	111	144	150	242	124	206	396	139	243	280	277	338	150	66	135	88	130	87	203	226	160
BBS7	70	78	61	71	61	40	36	43	57	63	46	97	16	42	72	26	50	39	64	44	80	60	43	55	103	65	65	73	69	64	146	36	47	31	43	82	35	68	30	71
BBS9	39	46	26	24	33	30	7	24	31	39	27	82	52	24	96	37	42	80	76	50	60	156	25	24	227	96	73	168	101	146	85	81	56	62	90	85	69	95	150	109
BBX	84	25	59	36	40	49	23	56	17	50	24	49	53	20	41	34	79	122	108	79	201	152	96	65	24	162	19	131	25	53	71	59	49	56	178	135	39	89	137	148
BCAM	1	0	0	0	0	0	0	0	0	0	0	0	0	0	0	0	0	0	0	0	0	0	0	0	0	0	0	0	0	0	0	0	0	0	0	0	0	0	0	0
BCAN	9	7	1	4	0	0	0	0	0	0	0	0	0	3	3	0	0	0	2	4	0	0	0	5	1	1	4	1	10	0	4	0	6	6	14	1	25	3	18	8
BCAP29	321	295	279	271	226	237	150	235	176	186	126	309	344	285	263	301	242	348	352	271	478	294	460	302	327	384	214	316	384	303	387	323	416	412	539	557	412	613	824	426
BCAP31	50	29	27	47	34	56	17	16	10	16	15	55	42	36	37	39	26	29	32	28	37	38	32	55	16	37	31	17	35	51	53	33	57	54	67	55	50	46	163	66
BCAR1	10	9	14	14	5	7	13	13	0	0	9	1	17	17	6	32	1	0	4	1	29	10	28	24	34	60	30	27	16	29	24	19	11	22	20	23	15	26	53	46
BCAR3	10	29	31	51	31	36	18	18	15	18	24	62	52	39	36	58	15	36	53	28	49	30	26	35	58	107	34	88	65	38	46	59	50	40	34	37	39	31	47	57
BCAR4	421	209	217	322	252	313	162	201	581	554	418	696	639	515	896	749	291	360	402	363	504	338	485	323	624	1154	575	800	868	795	869	677	329	460	390	421	396	334	1013	465
BCAS1	0	0	0	0	0	0	0	1	0	0	2	0	0	0	0	0	0	0	0	0	0	0	5	2	7	6	0	0	0	9	0	0	1	0	0	0	0	0	13	1
BCAS2	222	155	103	179	126	191	72	131	133	111	65	191	154	155	168	174	146	165	231	261	317	253	237	224	234	283	123	320	327	284	400	258	149	267	277	326	199	263	491	322
BCAS3	92	98	86	114	112	133	57	57	56	85	92	97	70	130	131	114	118	146	166	112	194	109	172	88	152	345	119	116	190	127	189	149	144	90	54	175	89	171	165	95
BCAS4	0	0	1	3	0	0	0	0	0	0	0	1	0	0	1	3	1	0	0	0	3	3	0	4	0	9	0	3	5	2	2	3	3	0	1	5	0	0	2	1
BCAT1	171	172	142	188	119	127	149	119	89	85	78	158	266	199	225	240	107	114	128	147	213	168	207	186	186	369	183	389	240	298	438	279	217	153	177	377	299	222	370	234
BCAT2	8	19	0	15	0	4	1	3	9	7	1	18	18	16	14	35	16	3	22	42	3	10	15	5	55	55	18	34	31	41	15	35	20	8	24	12	15	16	25	12
BCCIP	150	153	122	124	128	100	66	89	94	101	81	180	124	129	138	149	143	136	132	162	255	177	224	149	183	223	134	212	191	214	267	191	209	240	207	447	247	255	607	302
BCDIN3D	0	0	0	0	0	0	0	0	0	0	0	0	0	0	0	0	1	0	0	0	0	0	5	0	0	0	0	0	0	0	0	0	0	0	0	0	0	0	25	0
BCHE	0	0	0	0	0	0	0	0	0	0	0	0	0	0	0	0	0	0	0	0	0	0	0	0	0	0	0	0	1	0	0	0	0	0	0	0	0	0	0	0
BCKDHA	6	30	32	15	18	28	13	14	19	45	7	48	21	33	31	34	20	24	21	34	59	36	53	21	8	41	50	24	34	44	44	61	21	24	9	45	16	17	19	22
BCKDHB	86	87	38	79	36	38	50	32	6	14	34	82	102	57	79	75	0	6	75	91	83	97	86	79	97	194	66	80	87	107	125	90	67	90	61	159	109	85	166	174
BCKDK	57	58	25	25	22	37	23	31	31	22	34	107	102	64	51	33	43	28	103	75	54	66	47	43	85	191	75	167	100	83	116	84	31	79	64	93	58	127	134	55
BCL10	645	635	404	501	493	553	402	437	473	617	356	929	877	747	920	741	765	768	930	928	1004	844	825	739	950	1410	678	1051	1273	1047	1305	982	569	597	497	1109	796	791	929	658
BCL11A	0	2	0	2	0	0	2	5	0	3	0	6	0	7	0	0	0	1	1	0	13	0	0	3	9	6	0	0	0	0	3	5	1	0	0	7	2	0	8	12
BCL11B	0	0	0	1	0	0	0	0	0	0	0	0	0	0	0	1	0	0	0	0	5	0	0	0	0	0	2	0	0	0	0	0	0	0	0	1	0	0	0	0
BCL2	0	0	0	0	1	0	0	0	0	0	0	0	0	0	0	0	0	0	0	0	0	0	0	0	0	0	0	0	0	0	0	0	0	0	0	0	0	0	4	1
BCL2A1	0	0	0	0	0	0	0	0	0	0	0	0	0	0	0	0	0	0	0	0	0	0	0	0	0	0	0	0	0	0	5	0	0	0	0	0	0	0	0	0
BCL2L1	73	91	58	81	65	85	33	53	76	52	47	100	66	63	78	67	102	86	115	98	138	77	97	115	104	110	53	79	88	146	92	84	93	101	193	148	112	94	103	131
BCL2L10	1056	941	746	935	798	889	623	727	846	931	524	1146	1099	1076	1397	1380	762	935	1047	1080	1299	899	1097	902	1327	2213	913	1468	1630	1744	1888	1345	905	1398	1095	1761	1187	1195	2144	1417
BCL2L11	3	5	14	22	7	13	17	24	7	8	1	2	16	10	44	10	15	21	27	31	15	22	51	25	26	11	8	40	3	27	26	48	30	16	37	39	41	27	90	40
BCL2L12	18	11	8	15	5	17	8	13	10	7	8	19	11	20	17	20	8	21	14	22	7	12	15	20	33	23	16	10	21	11	25	18	23	20	13	23	40	25	45	30
BCL2L13	15	10	26	12	17	32	21	7	11	14	11	10	0	14	23	12	14	19	25	29	23	12	19	3	9	86	16	23	15	14	24	1	36	21	38	56	34	30	40	29
BCL2L14	52	33	22	39	17	40	9	7	12	18	11	20	30	20	28	39	24	13	35	20	46	49	74	30	38	37	1	26	33	27	36	36	46	33	53	22	47	17	70	40
BCL2L15	0	0	0	0	0	0	0	0	0	2	1	0	0	3	0	0	0	0	0	0	0	0	2	0	0	0	0	0	0	0	0	0	0	0	2	0	0	0	0	1
BCL2L2	48	66	17	30	34	30	33	21	7	17	14	47	11	63	33	18	33	75	46	76	37	52	17	23	108	57	18	15	25	29	26	39	49	26	52	92	31	34	89	46
BCL3	10	21	23	22	14	22	19	17	17	18	10	20	17	22	51	21	25	31	24	23	36	18	25	22	23	71	32	44	46	52	58	36	20	27	20	39	26	41	51	29
BCL6	7	0	7	2	27	11	5	4	7	6	3	17	12	1	14	10	12	3	7	14	28	8	9	8	6	0	9	2	8	22	6	8	3	3	15	12	10	4	14	19
BCL6B	78	82	97	150	101	106	50	126	106	131	44	145	147	157	132	149	106	91	94	112	133	122	68	47	297	395	138	180	224	341	257	164	120	90	67	156	145	128	115	74
BCL7A	44	82	43	74	44	49	21	42	14	19	9	48	53	65	13	38	19	25	57	125	95	70	90	34	16	20	44	58	47	3	31	6	74	39	112	117	124	55	101	91
BCL7B	185	161	183	265	98	171	125	238	78	122	83	123	115	286	288	208	106	89	155	134	219	347	394	343	148	341	156	303	228	349	362	229	301	280	370	547	384	465	676	385
BCL7C	1	4	7	13	2	2	8	6	2	4	2	5	2	4	26	51	3	0	5	5	6	0	21	18	0	12	0	9	12	25	45	48	3	2	11	10	16	13	48	37
BCL9	78	45	28	125	66	81	20	23	23	31	17	48	87	70	69	106	58	88	47	103	67	52	102	53	41	119	51	95	73	113	96	65	49	39	33	57	52	60	96	34
BCL9L	0	0	2	3	1	0	3	0	3	2	0	3	1	9	0	2	2	2	4	0	0	6	0	0	4	1	2	1	3	1	1	2	0	1	0	10	2	3	20	7
BCLAF1	43	58	39	86	71	71	87	80	55	67	84	107	91	98	111	126	108	133	131	108	208	108	103	36	203	277	170	186	135	236	175	110	67	64	116	65	78	124	88	111
BCLAF3	95	67	77	100	40	70	70	77	6	29	40	50	26	77	63	108	15	9	58	38	130	119	160	116	152	282	92	155	150	217	272	226	99	158	93	129	136	155	235	88
BCNT2	687	784	442	790	632	760	497	514	755	761	638	1326	1206	1003	1283	1292	865	925	1145	1134	1259	989	985	889	2545	3641	1904	3305	2755	3444	3517	2322	903	1150	932	1482	1018	913	1873	1191
BCO1	0	0	0	0	0	0	0	0	0	0	0	0	0	0	0	1	0	0	0	0	0	0	0	0	0	0	0	0	0	0	0	0	0	0	0	0	0	0	0	0
BCO2	0	8	3	0	0	2	0	0	0	0	0	0	5	0	0	0	0	0	0	12	0	0	5	0	0	0	1	0	0	0	0	1	0	1	0	0	0	0	0	2
BCOR	191	181	82	132	130	172	101	143	146	181	83	266	195	301	351	324	92	118	294	303	337	431	195	193	429	630	382	500	414	384	356	362	150	126	138	176	152	173	247	143
BCORL1	5	18	4	6	3	10	8	6	19	9	10	9	9	23	10	13	14	12	11	17	25	11	21	15	24	53	15	26	25	30	10	10	12	8	11	18	15	11	58	29
BCR	0	0	1	0	0	0	0	0	0	0	0	0	4	4	0	4	4	0	0	0	0	0	3	0	0	0	0	0	0	0	0	0	1	11	0	0	0	1	1	4
BCS1L	14	20	28	14	12	24	16	10	25	21	20	65	35	45	59	82	30	43	50	57	39	34	43	37	52	40	24	32	26	31	39	32	16	45	22	84	29	28	41	33
BDA20	0	0	0	0	0	0	0	0	0	0	0	0	0	0	0	0	0	0	0	0	0	0	0	0	0	0	0	0	0	0	0	0	0	0	0	0	0	0	0	0
BDH1	17	2	2	5	0	12	9	10	1	13	3	15	14	11	32	6	6	6	22	13	11	9	4	11	20	20	12	18	11	0	2	16	11	28	7	0	21	14	5	19
BDH2	0	0	0	0	0	0	0	0	0	0	0	0	0	0	0	0	0	0	0	5	0	0	0	0	0	0	0	0	0	0	3	0	0	0	0	0	0	0	0	0
BDKRB1	0	0	0	0	0	0	0	0	0	0	0	0	0	0	0	0	0	0	0	0	0	0	0	0	0	0	0	0	0	0	0	0	0	0	0	0	0	0	0	0
BDKRB2	0	0	0	0	0	0	0	0	0	0	0	0	0	0	0	0	0	0	0	0	0	0	0	0	0	0	0	0	0	0	0	0	1	0	0	0	0	0	0	0
BDNF	0	7	0	9	11	2	3	6	13	26	10	6	17	0	15	26	5	8	21	7	8	25	5	30	40	49	12	54	13	28	29	22	14	10	38	8	33	26	38	32
BDP1	36	45	24	42	38	56	44	33	19	41	29	87	56	45	46	67	31	57	44	52	149	34	81	34	102	109	96	123	125	114	102	104	47	55	27	26	54	36	83	40
BEAN1	0	0	0	0	0	0	0	0	0	0	0	0	0	0	0	0	0	0	0	0	0	0	0	2	0	0	0	0	0	1	0	0	3	0	0	0	0	0	0	1
BECN1	237	224	130	160	142	178	91	120	135	131	100	282	237	180	192	264	216	240	261	370	351	197	215	243	229	427	138	534	370	430	359	270	226	243	283	452	352	367	385	250
BECN2	0	0	0	0	0	0	0	0	0	0	0	0	0	0	0	0	0	0	0	0	0	0	0	0	0	0	0	0	0	0	0	0	0	0	0	0	0	0	0	0
BEGAIN	0	0	0	0	0	0	0	0	1	0	0	0	0	0	0	0	0	0	0	1	0	0	0	0	0	0	0	0	0	0	0	0	0	0	0	2	0	0	0	0
BEND2	0	0	0	0	0	0	0	0	2	0	0	0	0	0	0	0	0	0	0	0	0	0	0	0	0	0	0	0	0	0	0	0	2	0	0	0	0	0	0	0
BEND3	5	6	5	9	9	2	5	1	6	2	1	6	0	3	3	8	10	0	9	1	1	0	1	6	5	11	9	5	13	18	22	5	1	4	13	4	8	0	7	6
BEND4	14	12	18	35	8	7	10	39	9	10	5	9	16	3	44	34	0	14	9	12	11	16	18	27	16	30	11	27	16	10	32	19	16	3	7	27	12	34	38	62
BEND5	0	0	0	0	0	0	0	0	0	0	1	0	1	0	0	0	0	0	0	0	0	0	6	0	0	0	0	5	0	4	2	0	1	0	6	0	0	0	5	0
BEND6	0	0	0	0	0	0	0	0	0	0	0	0	0	0	0	0	0	0	0	0	0	0	0	0	0	0	0	0	0	0	0	0	0	0	0	0	0	0	0	0
BEND7	9	9	4	1	0	3	3	6	0	1	2	1	0	5	3	6	2	12	4	3	0	15	10	1	0	9	7	12	2	7	9	3	0	4	8	5	13	0	23	1
BERV-K1	0	0	0	0	0	0	0	0	0	0	0	0	0	0	0	0	0	0	0	0	0	8	0	0	0	0	0	0	0	0	0	0	0	0	0	0	0	0	0	0
BEST1	0	0	0	0	0	0	0	0	0	0	0	0	0	0	0	0	0	0	0	0	0	0	0	0	0	0	0	0	0	0	0	0	0	0	0	2	0	0	0	0
BEST2	4	1	0	0	0	0	0	0	0	0	0	4	0	0	0	0	0	1	0	1	0	0	0	1	7	4	0	0	0	0	0	0	3	0	0	2	0	4	0	0
BEST3	0	5	0	4	0	4	3	3	0	11	11	0	0	11	12	1	1	0	0	17	26	0	0	5	31	24	8	16	58	20	9	11	6	9	12	0	12	18	0	0
BEST4	0	0	0	0	0	0	0	0	0	0	0	0	0	0	0	0	0	0	0	0	0	0	0	0	0	0	0	0	0	0	0	0	0	0	0	0	0	0	0	0
BET1	42	44	59	91	78	81	65	65	149	212	127	280	258	202	312	218	96	126	134	119	97	79	74	63	316	505	266	455	403	447	546	275	87	90	70	126	109	95	191	101
BET1L	7	15	6	0	15	17	10	5	16	4	7	12	20	2	16	8	7	5	22	18	6	2	0	6	24	24	19	36	39	8	13	23	16	1	12	20	10	5	5	34
BEX2	0	0	0	0	0	0	0	0	0	0	0	0	0	0	0	0	0	0	0	0	0	0	0	0	0	0	0	0	0	0	0	0	0	0	0	4	0	0	0	0
BEX3	0	5	0	0	6	1	0	4	1	0	2	1	0	1	1	3	0	0	0	0	0	0	3	0	8	7	0	0	4	0	11	4	0	0	5	5	10	8	20	4
BEX4	64	55	46	52	44	37	28	38	0	9	3	16	5	5	6	13	48	37	37	64	92	28	75	44	0	11	22	2	11	1	5	6	25	26	20	27	37	41	47	38
BEX5	0	0	0	0	0	0	0	0	0	0	0	0	0	0	0	0	0	0	0	0	0	0	0	0	0	0	0	0	0	0	0	0	0	0	0	0	0	0	0	0
BFAR	14	27	20	35	23	17	22	10	19	28	9	52	29	39	15	16	34	42	16	26	54	33	17	39	51	70	20	28	46	22	24	16	22	38	41	53	15	65	30	48
BFSP1	0	0	0	0	0	0	0	0	0	0	0	0	0	0	0	0	0	0	0	0	0	0	0	0	2	0	0	0	0	0	0	0	0	4	0	0	7	0	0	0
BFSP2	0	0	3	0	0	0	0	0	0	0	0	0	0	0	0	0	0	0	0	0	0	0	0	0	0	0	0	0	0	0	0	0	0	0	0	1	0	0	0	0
BGLAP	0	0	0	0	0	0	0	0	0	0	0	0	0	0	0	0	0	0	0	0	0	0	0	0	0	0	0	0	0	0	0	0	1	0	0	0	0	0	0	0
BGN	0	0	0	0	0	0	0	0	0	0	0	0	0	0	0	0	0	0	0	0	0	0	0	0	0	0	0	0	0	0	0	0	0	0	0	0	0	0	0	0
BHLHA15	0	0	0	0	0	0	0	0	0	0	0	0	0	0	0	0	0	0	0	0	0	0	0	0	0	0	0	0	0	0	0	0	0	0	0	0	0	0	0	0
BHLHA9	0	0	0	0	0	0	0	0	0	0	0	0	0	0	0	0	0	0	0	0	0	0	0	0	0	0	0	0	0	0	0	0	0	0	0	0	0	0	0	0
BHLHE22	4	2	0	2	2	1	5	3	1	0	5	4	2	8	5	2	5	0	1	2	0	5	0	9	3	5	21	25	14	5	11	25	6	0	4	7	17	0	2	15
BHLHE23	0	0	0	0	0	0	0	0	0	0	0	0	0	0	0	0	0	0	0	0	0	0	0	0	0	0	0	0	0	0	0	0	0	0	0	0	0	0	0	0
BHLHE40	0	0	0	0	0	0	0	0	0	0	0	0	8	0	1	0	0	0	0	0	0	0	0	0	0	0	0	0	0	0	0	0	0	0	0	0	0	0	0	0
BHLHE41	0	0	0	0	0	0	0	1	0	1	0	0	0	0	0	0	0	0	0	0	0	0	0	2	0	4	0	2	2	0	0	0	0	0	1	0	0	0	2	0
BHMG1	9	4	1	3	3	3	2	1	0	0	0	1	0	0	0	7	4	6	1	1	2	8	11	0	0	0	0	0	4	5	3	9	1	0	0	11	0	2	1	1
BHMT	23	9	10	18	13	8	11	9	17	7	11	14	10	10	16	3	34	30	20	11	24	36	31	11	7	7	15	18	26	10	30	17	24	10	14	10	16	20	49	18
BHMT2	0	0	0	0	0	0	0	0	0	0	0	0	0	0	0	0	0	0	0	0	0	0	0	0	0	0	0	0	0	2	0	0	0	0	0	0	0	0	0	6
BICC1	218	129	170	213	127	163	128	145	196	153	137	261	246	208	299	392	202	305	258	200	297	202	353	260	242	506	225	368	337	445	499	451	162	283	248	255	143	232	448	235
BICD1	25	12	26	30	38	20	32	17	4	21	17	31	58	31	20	91	24	16	17	29	50	34	0	11	40	23	69	42	31	43	66	50	12	18	64	52	81	67	20	26
BICD2	38	30	25	22	13	19	8	42	27	15	6	20	0	28	62	46	46	36	28	16	43	49	55	16	20	121	46	39	76	79	50	69	55	37	89	24	17	106	40	63
BICDL1	7	17	11	11	1	7	9	8	0	11	4	2	14	4	20	18	9	4	0	7	2	18	9	6	23	6	2	12	6	5	13	12	30	15	22	62	17	12	51	48
BICDL2	42	25	21	25	16	22	6	18	23	13	24	33	24	18	36	33	28	29	39	31	48	28	30	12	7	27	16	29	37	30	24	6	38	31	34	31	12	23	62	22
BICRA	3	6	4	4	2	8	2	0	3	9	2	1	9	2	9	2	7	2	3	3	5	4	4	1	2	14	0	8	5	5	13	0	1	1	6	4	5	4	9	2
BICRAL	24	36	12	16	16	28	20	13	17	16	4	23	45	41	22	32	26	69	31	60	49	24	32	28	0	0	39	10	34	29	29	24	25	30	29	36	4	23	16	31
BID	1	2	9	4	13	16	5	6	9	5	2	9	19	16	6	19	1	6	22	7	32	21	14	13	1	11	6	14	13	2	0	11	19	18	25	35	13	20	27	9
BIK	0	0	0	0	0	0	0	0	0	0	0	0	0	0	0	0	0	0	0	0	0	0	0	0	0	0	0	0	0	0	1	0	0	0	0	0	0	0	0	0
BIN1	0	0	0	0	0	1	0	0	0	0	1	0	0	0	4	1	0	0	0	0	2	0	0	0	0	0	0	0	0	0	0	0	2	0	0	0	0	0	32	5
BIN2	261	223	170	277	194	333	162	165	163	196	131	279	252	196	299	312	234	310	526	359	508	386	396	267	222	368	143	304	271	388	419	317	321	355	427	647	351	487	712	513
BIN3	130	102	56	95	73	61	59	87	69	87	48	124	88	60	144	81	92	155	122	179	232	138	135	139	96	134	52	81	101	128	94	94	188	150	150	189	160	189	321	185
BIRC2	82	65	55	93	58	117	48	38	13	51	60	66	113	112	93	80	49	51	92	109	79	100	42	119	196	299	123	171	199	159	283	147	262	204	383	362	267	247	435	243
BIRC3	132	182	42	131	80	73	58	77	68	65	34	76	159	96	89	106	68	160	94	148	112	113	85	118	117	283	100	93	130	118	171	97	230	148	70	239	143	240	171	177
BIRC5	627	474	334	464	375	503	289	336	394	449	270	588	611	563	603	565	447	559	627	546	738	638	694	509	1021	1526	697	963	889	1076	1082	889	748	788	726	1131	839	820	1297	1095
BIRC6	34	61	27	50	32	27	22	54	22	36	24	73	47	77	78	55	26	29	8	43	103	77	49	51	96	178	53	111	173	184	140	111	25	44	5	43	23	73	87	5
BIRC7	0	0	0	0	0	0	0	0	0	0	0	0	0	0	0	0	0	0	0	0	0	0	0	0	0	0	0	0	0	0	0	0	0	0	0	0	0	0	0	0
BIVM	4	1	3	20	5	0	0	2	1	0	2	8	0	14	2	7	0	5	0	5	0	12	8	3	11	59	20	37	2	29	20	0	18	1	4	6	29	18	0	30
BLA-DQB	0	0	0	0	0	0	0	0	0	0	0	0	0	0	0	0	0	0	0	0	0	0	0	0	0	0	0	0	0	0	0	0	0	0	0	0	0	0	0	0
BLCAP	250	293	236	318	304	352	197	205	266	293	153	282	405	355	426	431	255	203	319	281	390	304	370	237	497	879	381	553	566	981	699	492	507	609	657	981	622	692	891	771
BLK	0	0	0	0	0	0	0	0	0	0	0	0	10	0	0	0	2	0	0	0	0	0	0	0	0	0	0	0	0	0	0	0	0	0	0	0	0	0	0	0
BLM	687	626	418	634	519	611	389	362	418	576	298	921	973	551	695	752	789	879	1146	1050	1291	1008	892	701	1104	1837	784	1190	1097	1266	1293	933	776	788	925	1171	904	977	968	1072
BLMH	774	806	502	731	637	797	437	577	543	608	439	871	863	661	991	990	678	849	900	953	1140	960	977	682	1292	1934	961	1276	1433	1749	1682	1239	1080	1211	1207	1721	1208	1244	2074	1283
BLNK	0	0	0	0	0	0	0	0	0	0	0	0	0	0	0	0	0	0	0	0	0	0	0	0	0	0	0	0	0	0	0	0	0	0	0	0	0	0	0	0
BLOC1S1	6	9	3	6	4	3	1	1	3	2	6	4	8	8	6	6	10	5	5	7	9	4	7	4	11	5	0	6	7	22	7	6	4	3	3	20	8	3	17	6
BLOC1S2	14	9	1	0	1	2	4	1	0	0	3	8	0	5	6	17	4	5	13	5	4	22	21	11	0	7	3	0	1	13	12	8	8	8	14	8	11	19	51	11
BLOC1S3	0	0	0	1	0	0	0	0	0	0	0	0	0	0	0	0	0	0	0	0	0	2	0	0	0	0	0	0	0	0	0	0	0	2	0	0	0	1	0	1
BLOC1S4	0	0	0	3	0	0	0	7	4	0	0	0	0	2	2	16	0	1	0	0	0	0	0	4	0	0	0	0	0	0	0	0	0	1	0	0	0	3	2	0
BLOC1S5	289	270	226	277	187	246	201	180	147	201	91	276	190	185	333	276	253	281	275	390	373	253	338	247	327	391	158	339	282	321	316	214	255	367	280	575	421	307	356	304
BLOC1S6	20	29	27	20	28	41	4	16	24	3	9	12	11	30	15	26	33	35	30	15	64	6	31	64	0	12	23	24	20	43	23	6	60	75	18	82	97	14	32	45
BLVRA	0	0	0	1	0	0	0	0	0	0	0	0	0	0	0	0	0	0	0	1	0	0	0	0	0	0	0	0	0	0	0	0	0	0	0	0	0	0	0	0
BLVRB	0	0	0	0	0	0	0	0	1	0	0	0	0	0	1	3	0	0	0	0	0	0	0	0	0	0	0	0	0	0	1	0	0	0	0	0	3	0	0	0
BLZF1	355	252	244	354	223	446	213	181	298	306	224	492	436	330	375	318	338	519	473	514	393	395	437	359	392	404	301	511	325	443	612	277	447	406	361	594	477	388	776	532
BMF	31	21	4	14	8	14	4	8	3	0	3	2	27	5	5	6	5	1	14	6	33	20	20	3	30	37	11	9	14	5	36	0	10	13	18	14	15	23	0	11
BMI1	0	2	0	0	0	6	0	0	0	0	3	0	0	0	0	2	0	2	0	0	0	12	0	0	0	0	0	0	0	17	7	11	8	1	2	0	14	7	25	9
BMP1	4	0	2	0	0	0	1	2	0	0	0	0	0	0	0	9	0	0	0	0	0	0	6	0	0	0	0	0	0	0	0	0	0	0	0	0	0	0	0	10
BMP10	0	0	0	0	0	0	0	0	0	0	0	0	0	0	0	0	0	0	0	0	0	0	0	0	0	0	0	0	0	0	0	0	0	0	0	0	0	0	0	0
BMP15	6691	6428	5140	6476	5709	7091	4235	5104	3818	4585	2927	6832	6121	6260	6854	6892	7757	8673	10132	8854	10773	9328	9696	7194	9565	14078	6932	10487	8477	11108	10168	7743	10237	9792	11599	15188	11726	13088	13541	13049
BMP2	0	0	0	0	0	0	0	5	0	0	0	0	0	0	3	0	0	0	0	0	0	0	0	0	0	4	0	0	0	0	0	0	0	0	0	1	0	0	0	8
BMP2K	5	25	6	39	7	23	9	25	19	0	16	16	7	5	31	70	3	10	3	27	26	5	17	24	25	84	14	41	17	35	67	29	3	40	10	13	10	31	68	26
BMP3	1	2	3	7	5	0	6	4	1	12	2	5	6	20	11	30	2	2	15	0	5	30	25	0	13	12	11	4	5	6	11	13	23	20	22	23	19	12	9	17
BMP4	31	42	25	20	21	23	10	30	14	33	10	56	62	25	32	64	42	33	64	46	96	29	70	15	3	105	30	43	34	50	12	31	87	35	79	95	80	115	134	102
BMP5	0	0	0	0	0	0	0	0	0	0	0	0	0	0	0	0	0	0	0	0	0	0	0	0	0	0	0	0	0	0	0	0	0	0	0	0	0	0	0	0
BMP6	32	14	20	36	34	9	23	43	6	15	6	14	36	50	70	49	9	18	11	26	47	48	42	61	47	42	16	39	28	68	47	49	20	26	46	29	37	46	146	106
BMP7	0	0	0	0	0	0	0	2	0	0	3	4	0	0	0	0	0	0	0	7	0	0	3	0	0	7	1	0	3	5	0	0	0	3	3	0	0	0	0	4
BMP8A	0	0	0	0	0	0	0	0	0	0	0	0	0	0	0	0	0	0	0	0	0	0	0	0	0	0	0	0	0	0	0	0	0	0	0	0	0	0	0	0
BMP8B	0	0	0	0	0	0	0	0	0	0	0	0	0	0	0	0	0	0	0	0	0	0	0	0	0	0	0	0	0	0	0	0	0	0	0	0	0	0	0	0
BMPER	0	0	0	0	0	0	0	0	0	0	0	0	0	0	0	0	11	0	15	1	5	0	0	0	0	0	0	0	0	0	0	0	0	16	19	0	12	0	0	0
BMPR1A	169	151	151	148	149	171	147	158	150	234	160	222	136	212	273	222	183	234	223	223	245	246	250	215	251	440	157	286	371	429	446	239	125	173	236	286	105	117	303	118
BMPR1B	334	304	233	267	325	252	160	217	294	304	179	386	398	345	400	352	314	355	433	386	479	392	412	303	291	508	287	362	377	513	538	365	305	348	285	477	352	307	560	421
BMPR2	63	98	49	168	80	47	71	59	107	61	56	181	130	158	128	86	69	136	124	94	86	64	106	74	104	240	132	276	107	201	197	151	68	130	113	97	54	100	214	138
BMS1	44	18	15	48	45	88	10	45	44	40	21	44	38	102	84	60	38	58	30	82	48	37	37	45	66	191	60	59	45	103	113	41	39	19	50	4	37	70	39	23
BMT2	3	1	9	16	5	1	4	12	0	0	0	2	3	5	16	13	0	3	1	0	0	0	7	7	1	6	3	9	16	33	25	25	1	2	17	37	32	5	44	22
BMX	0	0	0	0	0	0	0	0	1	0	0	0	0	0	0	0	0	0	0	0	0	0	0	0	0	0	0	0	0	0	0	0	0	0	0	0	0	0	0	0
BNC1	31	32	29	26	18	37	22	25	5	9	11	35	0	33	31	45	22	39	29	45	24	8	16	21	0	44	29	40	17	14	63	20	19	20	47	20	56	68	48	19
BNC2	610	565	415	518	522	650	334	478	502	499	329	695	831	790	778	870	915	864	934	879	1101	1038	1067	606	1540	1841	862	1357	965	1259	1010	766	819	792	716	1021	1050	820	909	825
BNIP1	11	11	17	19	16	34	12	18	8	13	7	12	38	10	40	30	33	34	38	19	45	23	27	42	41	14	9	14	22	22	24	18	21	39	20	17	18	38	35	32
BNIP2	1	7	2	1	4	6	0	0	6	1	2	3	13	6	0	22	1	4	11	0	7	0	6	5	0	7	19	7	0	0	0	21	16	5	2	1	10	36	3	19
BNIP3	364	270	264	323	253	305	176	229	206	262	161	338	326	284	418	359	91	170	460	394	426	384	424	313	365	634	239	430	467	377	503	294	391	406	428	595	448	439	663	535
BNIP3L	378	324	230	375	266	318	217	192	182	268	209	399	312	351	345	462	341	435	487	500	564	409	475	392	301	645	252	321	365	431	580	430	424	378	450	667	396	623	908	587
BNIPL	9	6	0	6	8	6	0	6	2	6	5	2	6	7	5	12	5	8	2	9	18	22	19	0	13	6	3	31	4	5	15	18	2	0	8	3	0	6	20	5
BOC	780	880	700	818	649	959	332	538	664	800	463	1094	981	983	845	1161	1438	1710	1577	1579	1949	1608	1788	1103	713	1082	496	820	886	819	798	457	818	747	1004	1504	866	939	1292	1062
BOD1	83	51	65	118	43	56	45	81	48	69	41	75	76	69	108	126	59	69	95	70	111	91	91	123	69	129	61	152	127	176	225	180	52	94	48	110	142	82	522	159
BOD1L1	10	9	16	22	21	11	4	46	18	38	17	12	44	19	26	43	25	36	44	11	27	5	2	36	53	12	16	52	58	40	18	25	21	45	10	21	6	4	42	27
BOK	0	0	0	0	0	0	0	0	0	0	0	0	0	0	0	0	0	0	0	0	0	0	0	0	0	0	0	0	0	0	0	0	0	0	0	0	0	0	0	0
BOLA	0	0	0	0	0	0	0	0	1	0	0	0	0	0	0	0	0	1	0	0	0	1	0	1	0	0	0	1	0	0	0	0	0	0	2	5	2	0	0	0
BOLA-DMA	2	9	8	5	9	6	4	7	5	3	4	11	20	4	14	7	6	4	12	16	9	5	2	18	5	20	6	27	11	7	12	9	5	16	28	14	13	19	13	6
BOLA-DMB	0	0	0	0	0	0	0	0	0	0	0	0	0	0	0	0	2	0	0	0	0	0	0	0	0	0	0	0	0	0	0	0	0	0	0	0	11	0	0	0
BOLA-DOA	0	0	0	0	0	0	0	0	0	0	0	0	0	0	0	0	0	0	0	0	0	0	0	0	0	0	0	0	0	0	0	0	0	0	0	0	0	0	0	0
BOLA-DOB	0	0	0	0	0	0	0	0	0	0	0	0	0	0	0	0	0	2	0	0	0	0	0	0	0	0	0	0	0	0	0	0	0	0	0	0	0	0	0	0
BOLA-DQA2	0	0	0	0	0	0	0	0	0	0	0	0	0	0	0	0	0	0	0	0	0	0	0	0	0	0	0	0	0	0	0	0	0	0	0	0	0	0	0	0
BOLA-DQA5	0	0	0	0	0	0	0	0	0	0	0	0	0	0	0	0	0	0	0	1	0	0	0	0	0	0	0	0	0	0	0	0	0	0	0	0	0	0	0	0
BOLA-DQB	0	0	0	0	0	0	0	0	0	0	0	0	0	0	0	0	0	0	0	0	6	0	0	0	0	0	0	0	0	0	0	0	0	0	0	0	0	0	0	0
BOLA-DRA	0	0	0	0	0	0	0	0	0	0	0	0	0	0	0	0	0	0	0	0	0	0	0	0	0	0	0	0	0	0	0	0	0	0	0	0	0	0	0	0
BOLA-DRB2	0	0	0	0	0	0	0	0	0	0	0	0	0	0	0	0	0	0	0	0	1	0	0	0	0	0	0	0	0	1	0	0	1	0	0	0	0	0	0	0
BOLA-DRB3	0	0	2	0	0	0	0	0	0	0	0	0	1	5	0	0	0	0	0	0	0	0	0	0	0	0	0	0	0	0	0	0	0	0	0	0	0	0	0	0
BOLA-DYA	0	0	0	0	0	0	0	0	0	0	0	0	0	0	0	0	4	5	0	3	0	0	0	0	0	0	7	0	0	1	0	0	4	0	0	0	0	0	0	3
BOLA-DYB	0	0	0	0	0	0	0	0	0	0	0	0	0	0	0	0	0	2	0	0	0	0	0	0	0	0	0	0	0	0	0	0	0	0	0	0	0	0	0	0
BOLA-NC1	0	0	0	0	0	0	0	0	0	0	0	0	0	0	0	0	0	0	0	0	0	0	0	0	0	0	0	0	0	0	0	0	0	0	0	0	0	0	0	0
BOLA1	0	0	0	1	0	0	1	0	3	3	0	1	0	0	3	0	0	0	2	0	0	0	2	1	0	0	0	1	1	0	1	2	4	6	0	3	0	8	6	8
BOLA2B	25	14	8	20	10	26	11	6	10	3	19	18	25	29	27	33	8	9	23	14	36	24	26	13	27	62	17	32	31	40	42	33	27	34	23	63	22	35	60	41
BOLA3	7	9	1	1	6	0	3	0	1	2	0	13	3	12	11	7	0	2	5	28	14	3	13	6	0	3	1	6	8	4	11	10	1	5	7	0	0	8	22	10
BOLL	72	53	38	50	33	62	44	42	55	46	24	90	72	106	42	58	60	59	78	56	60	86	70	41	61	60	53	64	57	61	62	43	33	46	62	63	35	61	85	65
BOP1	9	19	9	11	2	1	10	8	0	0	0	1	10	20	23	20	5	0	2	2	1	14	41	14	5	15	6	3	15	18	16	17	14	16	12	10	5	26	25	6
BORA	440	336	250	407	342	343	275	337	215	240	165	315	180	265	344	207	428	507	500	548	550	401	370	356	441	668	323	405	499	539	646	394	647	851	917	998	791	968	1140	960
BORCS5	69	58	66	87	67	98	41	83	119	140	61	143	137	100	149	131	81	100	125	101	114	94	88	86	128	317	134	155	161	196	203	196	105	121	112	175	114	109	176	112
BORCS6	5	14	3	6	2	4	2	0	4	0	3	2	1	3	2	0	5	9	0	4	7	2	6	8	12	59	5	1	0	10	0	0	14	11	12	1	20	9	0	7
BORCS7	26	2	12	7	16	17	11	19	12	8	6	7	40	12	30	10	11	32	17	7	20	12	4	11	22	46	13	17	22	38	19	22	25	31	23	23	15	41	80	41
BORCS8	1	8	4	6	5	9	7	1	2	3	1	8	4	1	3	6	4	5	3	11	2	2	4	10	4	14	7	8	7	8	8	9	11	6	11	3	3	8	20	12
BOSTAUV1R403	0	0	0	0	0	0	0	0	0	0	0	0	0	0	0	0	0	0	0	0	0	0	0	0	0	0	0	0	0	0	0	0	0	0	0	0	0	0	0	0
BOSTAUV1R404	0	0	0	0	0	0	0	0	0	0	0	0	0	0	0	0	0	0	0	0	0	0	0	0	0	0	0	0	0	0	0	0	0	0	0	1	0	0	0	0
BOSTAUV1R414	0	0	0	0	0	0	0	0	0	0	0	0	0	0	0	0	0	0	0	0	7	0	0	0	0	0	0	0	0	0	0	0	0	0	0	10	0	1	5	0
BOSTAUV1R416	0	0	0	0	0	0	0	0	0	0	0	0	0	0	0	0	0	0	0	0	0	0	0	0	0	0	0	0	0	0	0	0	0	2	0	0	0	0	0	0
BOSTAUV1R417	0	0	0	0	0	5	0	0	0	0	2	0	7	0	0	0	0	5	5	0	8	6	0	0	0	0	6	0	10	0	0	0	0	5	0	0	6	0	8	0
BOSTAUV1R418	0	0	0	0	0	0	0	0	0	0	0	0	0	0	0	0	0	0	0	0	0	0	0	0	0	0	0	0	0	0	0	0	0	0	0	0	0	0	0	0
BOSTAUV1R419	0	0	0	0	0	0	0	0	0	0	0	0	0	0	0	0	0	0	0	0	0	0	0	0	0	0	0	0	0	0	0	0	0	0	0	0	0	0	0	0
BOSTAUV1R424	0	0	0	0	0	0	0	0	0	0	0	0	0	0	0	0	0	0	0	0	0	0	0	0	0	0	0	0	0	0	0	0	0	0	0	0	0	0	0	0
BOSTAUV1R425	0	0	2	0	0	0	0	0	0	0	4	0	0	0	0	0	0	0	0	0	2	3	0	1	0	0	0	0	0	0	0	0	1	0	0	0	0	0	0	0
BOSTAUV1R426	0	0	0	0	0	0	0	0	0	0	0	0	0	0	0	0	0	0	0	0	0	0	1	0	0	0	0	0	0	0	0	0	0	0	0	0	0	0	0	0
BOTA-T2R10B	0	0	0	0	0	0	0	0	0	0	0	0	0	0	0	0	0	0	0	0	0	0	0	0	0	0	0	0	0	0	0	0	0	0	0	0	0	0	0	0
BPGM	385	337	281	372	296	340	215	264	235	337	216	429	400	396	461	494	350	411	468	422	574	418	427	404	589	874	429	755	767	847	885	548	406	505	392	546	436	461	839	459
BPHL	13	31	23	26	21	42	20	22	28	27	8	27	34	27	24	30	12	35	35	33	44	26	35	34	59	65	18	40	42	45	40	81	40	32	59	47	35	43	54	42
BPI	0	0	0	0	0	0	0	0	0	0	0	0	0	0	0	0	0	0	0	0	0	0	0	0	0	0	0	0	0	0	0	0	0	0	0	0	0	0	0	0
BPIFA1	0	0	0	0	0	0	0	0	0	0	0	0	0	0	0	0	0	0	0	0	0	0	0	0	0	0	0	0	0	0	0	0	0	0	0	0	0	0	0	0
BPIFA2A	0	0	0	0	0	0	0	0	0	0	0	0	0	0	0	0	0	0	0	0	0	0	0	0	0	0	0	0	0	0	0	0	0	0	0	0	0	0	0	0
BPIFA2B	0	0	0	0	0	0	0	0	0	0	0	0	0	0	0	0	0	0	0	0	0	0	0	0	0	0	0	0	0	0	0	0	0	0	0	0	0	0	0	0
BPIFA2C	0	0	0	0	0	0	0	0	0	0	0	0	0	0	0	0	0	0	0	0	0	0	0	0	0	0	0	0	0	0	0	0	0	0	0	0	0	0	0	0
BPIFA2D	0	0	0	0	0	0	0	0	0	0	0	0	0	0	0	0	0	0	0	0	0	0	0	0	0	0	0	0	0	0	0	0	0	0	0	0	0	0	0	0
BPIFA3	0	0	0	0	0	0	0	0	0	0	0	0	0	0	0	0	0	0	0	0	0	0	0	0	0	0	0	0	0	0	0	0	0	0	0	0	0	0	0	0
BPIFA4	0	0	0	0	0	0	0	0	0	0	0	0	0	0	0	0	0	0	0	0	0	0	0	0	0	0	0	0	0	0	0	0	0	0	0	0	0	0	0	0
BPIFB1	0	0	0	0	0	0	0	0	0	0	0	0	0	0	0	0	0	0	0	0	0	0	0	0	0	0	0	0	0	0	0	0	0	0	0	0	0	0	0	0
BPIFB2	0	0	0	0	0	0	0	0	0	0	0	0	0	0	0	0	0	0	0	0	0	0	0	0	0	0	0	0	0	0	0	0	0	0	0	0	0	0	0	0
BPIFB3	0	0	0	0	0	0	0	0	0	0	0	0	0	0	0	0	0	0	0	0	0	0	0	0	0	0	0	0	0	0	0	0	0	0	0	0	0	0	0	0
BPIFB4	0	0	0	0	0	0	0	0	0	0	0	0	0	0	0	0	0	0	0	0	0	0	0	0	0	0	0	0	0	0	0	0	0	0	0	0	0	0	0	0
BPIFB5	0	0	0	0	0	0	0	0	0	0	0	0	0	0	0	0	0	0	0	0	0	0	0	0	0	0	0	0	0	0	0	0	0	0	0	0	0	0	0	0
BPIFB6	0	0	0	0	0	0	0	0	0	0	0	0	0	0	0	0	0	0	0	0	0	0	0	0	0	0	0	0	0	0	0	0	0	0	0	0	0	0	0	0
BPIFC	0	0	0	0	0	0	0	0	0	0	0	0	0	0	0	0	0	0	0	0	0	0	0	0	0	0	0	0	0	0	0	0	0	0	0	0	0	0	0	0
BPNT1	64	84	60	101	68	92	47	48	87	77	84	138	121	84	157	77	111	154	113	161	175	97	117	129	77	68	38	83	112	105	152	98	53	83	93	83	50	58	162	119
BPTF	43	9	16	51	22	18	12	19	40	54	20	42	14	28	21	26	34	36	61	46	30	27	46	24	38	31	27	79	55	78	48	67	47	35	55	27	11	22	139	42
BRAF	51	137	61	79	94	123	66	67	57	63	42	71	135	98	101	144	96	104	80	57	196	90	145	161	53	126	143	82	91	105	141	95	160	144	142	156	122	146	269	167
BRAP	358	312	214	280	240	230	202	262	212	131	133	333	214	302	325	384	116	225	488	385	424	406	376	309	479	471	224	353	316	405	502	393	456	420	536	655	453	492	597	578
BRAT1	6	0	3	0	0	2	0	2	0	0	0	0	0	0	3	0	0	4	0	3	0	1	2	0	5	5	6	0	0	1	0	0	0	1	1	1	1	1	5	4
BRB	0	0	0	0	0	0	0	0	1	0	0	0	4	0	0	0	0	0	0	0	0	0	0	0	0	0	1	0	0	0	0	0	0	0	0	0	0	0	0	0
BRCA1	145	111	101	92	90	140	98	59	92	95	76	164	147	208	166	175	143	166	177	178	277	176	183	104	438	730	380	493	427	590	530	401	93	200	175	161	119	95	374	151
BRCA2	306	394	247	342	296	464	238	224	281	330	271	527	629	513	548	483	406	454	369	425	551	377	410	311	597	1139	464	870	687	783	946	610	560	663	681	740	596	681	1191	680
BRCC3	99	91	72	83	68	93	43	52	50	78	38	122	118	112	94	57	61	82	87	89	122	135	98	85	194	232	143	222	206	139	221	187	92	177	180	165	98	166	133	135
BRD1	23	6	7	20	0	5	6	14	2	2	0	1	11	2	9	5	0	0	8	1	5	7	4	11	14	28	10	0	7	2	24	3	6	4	6	7	27	0	42	19
BRD2	252	328	224	328	302	235	197	240	426	544	250	647	661	705	545	851	406	355	589	445	751	598	582	299	1239	1645	781	1061	843	1289	978	797	555	397	687	693	429	546	712	682
BRD3	101	118	91	137	27	99	66	104	37	61	35	71	146	162	181	267	14	42	53	61	114	154	164	105	191	343	116	230	218	244	184	186	122	124	153	220	157	201	345	165
BRD3OS	16	19	14	8	9	14	3	15	5	7	11	33	14	25	8	23	24	23	8	22	19	27	19	12	17	16	8	29	46	30	14	26	10	23	17	15	9	36	36	17
BRD4	95	67	85	111	75	96	42	48	82	89	58	90	128	101	89	193	58	104	104	109	128	107	128	99	135	209	102	191	133	230	155	142	78	114	103	108	124	121	358	138
BRD7	327	248	221	591	211	221	237	591	134	213	163	273	361	316	468	1158	214	291	317	308	458	307	353	712	361	883	309	398	463	569	958	1267	339	431	430	575	401	483	987	1115
BRD8	331	259	186	315	202	307	140	212	182	144	86	361	233	344	293	386	395	333	520	406	563	435	534	442	263	346	127	244	318	231	262	214	283	182	276	492	394	291	422	342
BRD9	54	72	70	154	33	53	73	222	53	45	19	64	84	77	187	233	36	38	48	47	99	39	132	148	107	172	70	104	113	182	216	288	46	83	127	158	154	266	372	379
BRDT	3	3	0	3	10	9	6	1	0	0	1	0	10	2	0	0	6	4	4	8	0	1	9	3	6	6	4	14	9	3	6	5	1	4	0	4	2	3	17	4
BREH1	0	0	0	0	0	0	0	0	0	0	0	0	0	0	0	0	0	0	0	0	0	0	0	0	0	0	0	0	0	0	0	0	0	0	0	0	0	0	0	0
BRF1	0	3	0	1	0	0	0	5	0	0	0	1	0	0	3	2	0	0	0	0	0	0	2	3	0	0	0	0	0	5	0	0	1	0	0	0	0	0	0	4
BRF2	9	31	28	12	29	14	8	12	4	9	7	5	5	22	9	18	16	7	44	25	24	27	21	18	8	29	4	12	12	5	7	4	27	2	17	18	10	18	41	14
BRI3	13	14	19	21	13	15	11	24	16	7	7	7	19	26	20	46	6	11	11	19	32	32	30	29	14	33	2	11	17	18	11	26	13	13	8	15	15	23	60	25
BRI3BP	59	95	78	132	42	65	44	85	10	31	32	59	69	64	96	180	21	21	45	63	95	94	89	110	69	83	53	102	72	72	167	116	82	96	146	166	155	245	204	181
BRICD5	0	1	0	0	0	0	0	0	1	0	1	0	0	0	0	0	0	0	0	0	0	1	1	0	0	0	0	2	2	0	0	0	0	3	0	0	0	1	2	0
BRINP1	0	12	0	2	12	0	1	0	0	0	0	0	0	0	0	0	0	1	0	9	0	0	0	4	0	15	0	0	0	0	4	0	2	0	4	2	0	0	3	0
BRINP2	339	361	290	429	255	390	223	274	276	325	166	378	312	312	432	452	544	525	622	654	652	563	599	418	361	638	214	507	470	564	336	319	420	435	425	653	484	510	532	684
BRINP3	5	0	0	6	0	0	0	2	0	0	0	9	0	0	0	0	0	0	0	0	0	0	0	0	0	0	2	0	12	0	0	0	6	0	0	0	12	0	1	0
BRIP1	280	308	186	234	235	257	144	145	188	307	187	282	157	260	368	330	329	383	455	509	630	347	433	303	249	467	244	313	291	439	424	201	198	234	242	231	175	251	269	271
BRIX1	486	507	287	481	416	524	345	381	477	450	349	691	539	441	660	560	671	850	678	846	1118	707	893	769	550	1002	431	481	667	796	942	621	645	820	714	796	809	822	1158	918
BRK1	264	261	263	237	189	308	147	228	192	283	149	347	229	291	335	311	283	326	361	399	492	355	415	284	371	720	291	563	516	524	495	351	453	525	562	543	447	593	957	552
BRMS1	67	53	36	37	29	38	27	30	33	43	30	65	46	64	76	72	73	70	69	100	95	60	73	57	33	80	39	27	68	73	66	33	68	41	59	112	54	77	95	77
BRMS1L	178	228	145	153	114	144	146	90	165	169	110	262	293	157	178	218	154	266	288	202	330	234	197	179	251	423	212	448	322	435	483	331	222	292	340	379	306	388	321	315
BROX	104	106	57	78	57	55	48	97	76	72	70	87	96	55	47	122	133	93	127	142	164	170	96	77	47	213	72	140	155	184	96	136	158	131	193	156	151	107	187	193
BRPF1	118	133	120	148	152	166	72	47	78	57	62	173	116	187	209	164	209	160	243	289	339	335	268	188	123	184	65	175	150	129	105	157	154	135	145	235	161	193	157	260
BRPF3	3184	3503	2658	3112	2880	3706	1950	2440	2229	2565	1259	3313	3372	3173	3497	3357	3731	4148	4779	4446	5774	4941	4639	3326	3264	5044	2482	4131	3663	3687	3520	2749	2669	2208	2553	4416	3159	3104	3343	3353
BRS3	0	0	0	0	0	0	0	0	0	0	0	0	0	0	0	0	0	0	0	0	0	0	0	0	0	0	0	0	0	0	0	0	0	0	0	0	0	0	0	0
BRSK1	0	0	0	0	0	0	0	0	0	0	0	2	0	0	0	0	0	0	0	0	0	0	0	0	0	8	0	0	0	0	0	0	2	0	0	3	0	0	0	0
BRSK2	0	0	1	1	0	0	0	0	1	0	0	0	0	0	0	2	0	0	2	3	0	1	0	0	0	4	0	0	0	0	0	0	0	0	0	0	0	0	0	0
BRWD1	34	63	74	33	20	58	31	62	32	21	16	57	56	59	161	167	22	56	15	46	89	90	187	127	119	125	112	74	102	184	186	234	78	73	55	47	70	136	113	108
BRWD3	7	25	45	56	34	40	15	19	25	49	21	36	20	29	42	63	80	52	74	69	45	84	45	42	38	111	44	62	15	59	70	41	35	71	114	70	71	78	176	114
BSCL2	44	28	17	39	17	38	17	47	23	28	17	29	36	36	86	74	36	49	49	53	75	48	25	34	54	71	38	53	60	76	51	30	61	51	63	93	93	39	80	89
BSDC1	33	61	49	48	44	29	29	43	47	44	18	78	64	65	55	69	57	38	59	85	58	52	67	57	82	71	63	114	59	77	89	57	22	47	67	76	33	49	68	25
BSG	171	104	108	122	77	104	71	117	77	79	70	160	98	127	177	93	140	152	190	131	172	139	159	125	155	305	81	133	176	206	148	108	213	222	159	248	169	235	384	211
BSN	0	0	2	0	5	0	5	4	0	0	0	0	10	0	2	0	1	0	0	4	0	7	0	0	0	0	0	5	0	11	0	1	6	0	5	0	2	3	3	10
BSND	0	0	0	0	0	0	0	0	0	0	0	0	1	0	0	0	12	0	3	0	0	0	0	0	0	0	0	0	0	4	0	6	0	0	0	0	0	0	0	0
BSP1	0	1	0	0	0	0	0	0	17	11	9	14	19	31	39	10	7	6	6	13	17	8	6	6	5	49	6	9	28	23	33	21	21	35	22	37	30	13	86	30
BSP3	0	0	0	0	0	0	0	0	4	0	0	0	0	0	2	0	0	0	0	0	0	0	0	0	0	0	0	0	0	0	0	0	0	0	0	0	0	0	0	0
BSP5	0	0	0	0	0	0	0	0	0	0	0	0	0	0	0	0	0	0	0	0	0	0	0	0	0	0	0	0	0	0	0	0	0	0	0	0	0	0	0	0
BSPRY	147	122	156	171	44	175	74	150	14	11	53	90	258	181	305	184	13	16	143	59	187	292	262	220	221	422	126	124	207	186	161	119	200	170	172	263	238	204	252	260
BST1	0	0	0	0	0	0	0	0	0	0	0	0	0	4	0	0	0	0	0	0	0	0	6	0	0	9	0	0	0	0	0	0	0	0	0	0	0	0	0	1
BSX	19	8	8	7	6	11	4	8	10	2	8	16	11	21	13	13	9	18	18	16	12	18	12	11	18	18	23	24	13	31	15	14	10	25	27	37	7	35	46	39
BTAF1	79	65	56	74	6	50	29	24	3	1	20	25	52	29	61	64	8	8	28	14	71	95	55	48	58	109	53	130	131	111	114	68	50	99	85	54	117	48	123	123
BTBD1	0	0	0	0	0	0	0	0	0	1	1	1	0	1	0	0	0	0	0	0	0	0	4	0	0	0	0	0	0	0	0	1	0	0	0	0	0	0	6	0
BTBD10	1545	1207	934	1254	1141	1324	768	1056	749	966	617	1299	1269	1171	1422	1243	1387	1589	2001	1728	2221	1802	1859	1411	1993	3471	1614	2637	2168	2768	2581	2054	1827	2197	1949	2751	1914	2386	2831	2347
BTBD11	0	5	1	2	5	0	0	0	0	0	6	0	0	0	0	0	0	6	0	0	0	0	0	0	0	0	0	0	0	0	2	0	0	8	0	1	5	3	0	11
BTBD16	2	0	0	0	0	2	0	1	0	1	3	1	0	2	1	0	2	4	0	0	0	1	1	0	1	0	2	0	3	0	2	0	2	0	1	1	1	2	4	1
BTBD17	0	0	0	0	0	0	0	0	0	0	0	0	0	0	0	0	0	0	0	0	0	0	0	0	0	0	0	0	0	0	1	0	0	0	0	0	0	0	0	0
BTBD19	34	16	26	21	11	9	4	10	30	28	28	60	58	53	29	146	7	26	36	47	29	41	64	49	64	79	56	83	120	51	55	110	44	46	63	46	69	26	37	48
BTBD2	10	10	8	11	3	7	8	7	10	4	9	10	20	10	12	10	7	5	14	11	16	5	11	7	14	11	11	15	29	29	17	16	9	4	9	2	2	12	40	14
BTBD3	48	18	19	33	6	12	19	20	1	2	7	0	3	28	25	49	0	5	6	4	1	22	27	57	21	16	1	15	11	15	38	51	25	46	43	39	50	78	95	122
BTBD6	10	17	8	5	7	11	2	10	6	10	7	6	0	13	8	26	4	9	8	15	15	15	5	13	7	6	2	10	9	1	8	4	16	15	5	10	9	2	83	13
BTBD7	41	29	37	60	23	18	44	60	31	36	6	24	6	30	105	69	50	43	54	23	72	53	89	84	26	14	10	55	41	67	53	73	30	37	28	87	53	49	136	68
BTBD8	24	26	45	31	45	32	11	16	37	54	7	28	48	43	24	25	42	17	2	57	60	58	58	33	100	87	53	76	57	106	84	67	40	24	25	52	10	52	44	43
BTBD9	629	517	469	508	357	431	290	387	482	492	274	597	819	830	1018	728	394	529	681	631	821	781	689	557	1001	1538	790	1105	1223	1170	1056	941	539	664	642	980	597	680	820	658
BTC	0	0	0	0	0	0	0	0	0	0	0	0	0	0	0	0	0	0	0	0	0	0	0	0	0	0	0	0	0	0	0	0	0	0	0	0	0	0	0	0
BTD	2	14	4	1	7	5	3	9	2	24	8	44	22	27	24	20	12	17	24	11	30	18	15	10	12	17	9	15	9	14	17	15	4	11	23	10	17	24	25	9
BTF3	901	781	617	764	687	725	498	585	771	928	517	1188	1045	972	1245	1264	739	1050	1012	1075	1255	853	871	781	1258	1913	882	1260	1395	1533	1873	1233	844	1003	848	1458	973	1011	1829	1198
BTF3L4	226	170	113	194	167	167	102	144	163	170	91	252	141	104	156	157	154	193	234	232	263	227	258	192	173	144	89	224	141	195	199	145	133	204	188	174	199	187	400	272
BTG1	0	3	1	0	1	4	5	2	2	3	3	4	5	1	13	20	11	19	11	35	6	20	4	12	7	10	7	35	15	13	19	12	11	6	28	25	24	14	50	14
BTG2	0	0	0	0	0	0	0	0	0	0	0	0	0	0	0	0	0	0	1	0	0	0	0	0	0	0	0	0	0	0	0	0	0	0	0	0	0	1	2	2
BTG3	0	0	0	0	0	0	0	0	3	1	6	2	0	5	8	0	0	0	0	0	0	0	0	9	0	31	5	0	0	6	0	9	23	0	18	3	2	9	1	22
BTG4	41472	35686	29183	33685	29024	33285	22797	27045	18592	22411	14535	32490	27401	26051	31198	32012	36140	43098	49384	50349	62365	45112	47781	38590	26132	40969	20181	30285	33225	36425	40166	27358	40908	48084	50180	63972	52649	53829	89768	58630
BTK	292	208	214	272	199	327	162	188	70	103	72	131	151	141	136	191	380	450	582	518	654	475	570	382	214	308	162	136	227	315	307	238	533	653	612	825	823	780	951	698
BTLA	0	0	0	0	0	0	0	0	0	0	0	0	0	0	0	0	0	0	0	0	0	0	0	0	0	0	0	0	0	0	0	0	0	0	0	0	0	0	0	0
BTN1A1	0	0	0	0	0	0	0	0	0	0	0	0	0	0	0	0	0	0	0	0	0	0	0	0	0	0	0	0	0	0	0	0	0	0	0	0	0	0	0	0
BTN3A3	0	0	0	0	0	0	0	0	0	0	0	0	0	0	0	0	0	0	0	0	0	0	0	0	0	0	0	0	0	0	0	0	0	0	0	0	0	0	0	0
BTNL2	0	0	0	0	0	0	0	0	11	5	5	0	0	0	17	0	0	0	0	0	0	0	0	0	0	0	0	0	0	0	0	0	0	0	0	0	0	0	0	0
BTNL9	0	0	0	0	0	0	0	0	0	0	0	0	0	0	0	0	0	0	0	0	0	0	0	0	0	0	0	0	0	0	0	0	0	0	0	0	0	0	0	0
BTRC	751	677	593	701	728	536	441	470	630	750	405	929	798	995	993	943	973	1038	1103	1135	1464	1005	1021	934	1013	1568	641	1228	1250	1184	1280	760	646	923	735	987	668	745	1227	952
BUB1	146	128	92	132	96	164	48	116	152	132	125	246	161	187	333	191	127	256	299	212	268	100	137	135	393	443	259	409	391	424	457	299	108	129	212	279	161	163	118	163
BUB1B	209	160	141	219	129	239	108	102	254	249	139	384	280	256	354	326	269	275	337	286	386	181	287	250	580	712	515	765	856	801	800	557	172	170	154	123	203	177	148	236
BUB3	2471	2105	1544	1874	1626	1828	1229	1498	1559	1590	1189	2612	2028	1906	2334	2528	2358	2776	3037	2892	3480	2703	2787	2428	2051	3602	1444	2605	2980	2825	3532	2358	2730	2922	2781	4014	3245	3168	5804	3683
BUD13	199	253	134	214	180	208	137	129	172	249	141	248	134	199	233	258	238	283	261	250	285	211	263	232	285	217	174	289	342	249	362	260	242	253	198	280	308	138	399	223
BUD23	136	108	71	107	109	103	84	90	106	165	73	163	104	112	155	169	114	128	127	122	181	107	94	81	152	242	97	159	238	207	202	95	142	158	237	221	153	174	432	168
BUD31	55	54	33	63	40	61	40	38	96	102	62	144	118	92	143	121	55	88	109	76	102	73	91	64	89	170	120	139	143	145	210	177	67	114	108	112	79	109	222	105
BVES	10	14	19	8	2	6	0	13	0	2	5	0	0	2	5	1	20	43	3	8	30	19	1	18	0	1	6	0	19	4	1	10	10	23	0	31	27	20	1	11
BYSL	46	52	40	63	63	91	47	39	27	101	19	72	61	37	47	70	59	67	71	66	80	50	54	42	47	98	42	61	74	49	76	51	88	73	74	105	66	69	84	96
BZW1	434	281	281	398	297	359	134	296	261	295	164	440	321	334	460	415	300	430	450	458	525	524	439	373	579	763	356	801	615	709	815	693	473	586	652	641	537	769	676	632
BZW2	168	182	127	178	130	174	93	114	140	132	118	259	181	194	219	193	155	124	224	156	251	157	218	143	271	446	207	362	280	355	359	193	176	247	154	347	166	197	360	133
BoLA	0	0	0	0	0	0	0	0	0	0	0	0	0	0	0	0	0	0	0	0	0	0	0	0	0	0	0	0	0	0	0	0	0	0	0	1	0	0	0	0
C10H14orf1	3	9	12	24	13	24	7	7	15	15	11	15	20	29	23	23	3	22	5	2	12	7	13	3	21	15	11	23	9	32	15	8	7	15	18	9	19	20	47	6
C10H14orf119	629	502	385	444	400	538	322	356	446	490	364	586	613	584	685	627	502	572	559	606	714	528	637	438	529	1169	444	666	937	788	909	657	710	681	853	930	846	725	1383	955
C10H14orf39	6	12	0	2	5	19	7	0	2	9	9	7	1	0	19	3	24	26	67	30	43	7	40	17	13	56	25	37	34	25	67	3	35	40	18	39	1	29	9	35
C10H14orf93	0	0	0	0	0	0	0	0	0	0	0	0	0	0	2	8	0	0	0	0	0	0	0	0	0	0	0	0	0	0	0	0	1	0	3	7	0	5	0	0
C10H15orf41	41	37	51	39	20	51	23	32	50	39	26	47	61	87	60	70	48	66	53	68	59	53	65	31	64	67	38	159	34	39	86	86	34	79	98	114	40	53	151	111
C10H15orf48	14	16	13	9	8	8	19	13	7	23	11	25	7	13	17	21	42	23	23	32	31	21	14	21	21	64	16	45	27	16	27	25	7	22	14	9	18	28	40	38
C10H15orf59	0	0	0	0	0	0	0	0	0	0	2	0	0	0	0	0	0	0	0	0	0	0	1	1	1	0	0	0	0	0	0	0	0	0	0	0	0	0	0	0
C10H15orf61	34	20	20	24	3	4	18	27	6	3	7	20	19	12	18	29	4	1	9	11	25	6	34	15	9	63	12	33	26	33	46	26	33	29	22	15	39	26	98	35
C10H15orf62	0	1	0	0	0	0	0	0	0	0	0	0	0	0	0	0	1.7	0	0	0	0	0	0	0	0	1	0	0	0	0	0	0	0	0	0	0	0	0	0	0
C10H15orf65	0	4	0	2	2	0	1	12	3	0	1	1	0	3	3	6	2	1	2	6	4	5	7	3	5	11	29	12	6	9	3	4	13	2	9	4	0	0	9	4
C11H2orf15	0	0	0	0	0	0	0	0	0	0	0	0	0	0	0	0	0	0	0	0	0	0	0	0	0	0	0	0	0	0	0	0	0	0	0	0	0	0	0	0
C11H2orf16	0	1	0	2	3	3	6	1	15	4	3	0	1	0	0	7	1	0	5	0	13	0	0	4	0	5	1	0	5	24	4	4	4	10	5	27	6	30	20	9
C11H2orf40	0	0	0	0	0	0	0	0	2	0	0	0	0	0	0	0	0	0	0	0	0	0	0	0	0	0	0	0	0	0	0	0	0	0	0	0	0	0	0	0
C11H2orf42	214	260	211	267	243	186	161	169	198	251	174	352	311	280	401	281	222	306	372	359	402	351	436	303	311	611	303	359	561	398	584	398	350	270	310	378	333	350	381	415
C11H2orf49	29	87	51	53	51	53	37	24	46	46	32	108	81	49	59	79	44	63	104	116	70	50	52	75	48	87	29	81	65	50	93	73	25	58	59	113	60	51	165	131
C11H2orf50	0	0	0	0	0	0	0	0	0	0	0	0	0	0	0	0	0	0	0	0	0	0	0	0	0	0	0	0	0	0	0	0	0	0	0	0	0	0	0	0
C11H2orf68	22	12	10	11	7	10	5	25	5	29	13	33	16	38	21	4	29	7	15	19	14	16	6	12	33	14	15	34	33	15	30	56	3	17	22	11	14	4	37	6
C11H2orf70	0	0	0	0	0	0	0	0	0	0	0	0	0	0	0	0	0	0	0	0	0	0	0	0	0	0	0	0	0	0	0	0	0	0	0	0	0	0	0	0
C11H2orf71	0	0	0	0	0	0	0	0	0	0	0	1	0	4	0	0	0	0	0	0	0	0	0	0	0	4	0	6	0	0	0	0	0	0	0	0	0	0	0	0
C11H2orf73	0	0	0	0	0	0	0	0	0	0	0	0	0	0	0	0	0	0	0	0	0	0	0	0	1	0	0	0	0	0	0	0	0	0	0	0	0	0	0	0
C11H2orf74	0	0	0	0	0	0	0	0	0	0	0	0	0	0	0	0	0	0	0	0	0	0	0	0	0	0	0	0	0	0	0	0	0	0	0	0	0	0	0	0
C11H2orf78	0	0	0	0	0	0	0	0	0	0	0	0	0	0	0	0	0	0	0	0	0	0	0	0	0	0	0	0	0	0	0	0	0	0	0	0	0	0	0	0
C11H2orf81	2	2	0	0	0	2	0	0	0	0	0	0	0	2	5	0	1	0	0	0	0	0	2	6	0	8	0	0	0	0	0	0	5	1	0	0	0	0	0	3
C11H2orf92	12	1	0	4	7	7	0	1	7	3	1	5	0	1	8	11	2	12	1	2	4	0	9	0	11	2	4	0	5	4	15	5	5	2	5	13	7	8	0	4
C11H9orf116	3	0	7	7	0	1	2	13	10	1	4	2	0	7	9	14	4	5	4	7	20	6	5	14	13	16	1	2	11	11	4	14	5	0	18	8	10	0	3	12
C11H9orf16	4	11	2	0	0	4	2	3	0	7	0	3	11	6	8	9	4	4	4	4	15	3	6	2	4	30	5	2	3	8	8	3	3	0	0	0	6	9	32	3
C11H9orf50	0	0	0	0	0	0	0	0	0	0	0	0	0	0	0	0	0	0	0	0	5	0	1	0	2	0	5	0	1	0	0	0	0	0	0	0	0	0	1	0
C11H9orf78	186	112	91	102	126	111	92	77	113	135	68	153	78	115	155	89	97	151	170	114	214	113	119	114	189	181	77	193	232	156	258	143	129	167	146	246	127	185	352	177
C12H13orf42	0	0	0	0	0	0	0	0	0	0	0	0	0	1	0	0	0	0	0	0	0	0	0	0	0	0	0	0	0	0	0	0	0	0	0	0	0	0	0	0
C12H13orf46	0	0	0	0	0	0	0	0	0	0	0	0	0	0	0	0	0	0	0	0	0	0	0	0	0	0	0	0	0	0	0	0	0	0	0	0	2	0	0	0
C13H10orf113	0	0	0	0	0	1	0	0	0	0	0	0	0	0	0	0	0	0	0	0	0	0	0	0	0	0	0	0	0	0	0	0	0	0	0	0	0	0	0	0
C13H10orf67	0	0	0	0	0	0	0	0	0	0	0	0	0	0	0	0	0	0	0	0	0	0	0	1	0	0	0	0	0	0	0	0	0	0	0	0	0	0	0	0
C13H20orf141	0	0	0	0	0	0	0	0	0	0	0	0	0	0	0	0	0	0	0	0	0	0	0	0	0	0	0	0	0	0	0	0	0	0	0	0	0	0	0	0
C13H20orf144	0	0	0	0	0	0	0	0	0	0	0	0	0	0	0	0	0	0	0	0	0	0	0	0	0	0	0	0	0	0	0	0	0	0	0	0	0	0	0	0
C13H20orf173	0	0	0	0	0	0	0	0	0	0	0	0	0	0	0	0	0	0	0	0	0	0	0	0	0	3	0	0	0	0	0	0	0	0	0	0	0	0	0	0
C13H20orf194	0	3	11	3	1	14	11	1	4	6	1	18	1	7	3	4	7	4	7	0	2	13	6	18	16	0	12	0	18	2	7	3	3	6	7	0	20	25	8	22
C13H20orf202	0	0	0	0	0	0	0	0	0	0	0	0	0	0	0	0	0	0	0	0	1	0	0	0	0	0	0	0	0	0	0	0	1	0	0	0	0	0	8	0
C13H20orf204	0	0	2	0	0	0	0	0	0	0	0	0	0	0	0	0	0	0	0	0	0	0	0	0	0	0	0	0	0	1	0	0	0	0	0	0	0	0	0	0
C13H20orf27	192	212	175	187	138	174	110	117	97	98	102	210	247	234	214	237	108	157	247	235	282	230	253	216	391	540	242	392	484	406	390	417	272	300	275	390	276	452	571	326
C13H20orf85	0	0	0	0	0	0	0	0	0	0	0	0	0	0	0	0	0	0	0	0	0	0	0	0	0	0	0	0	0	2	0	0	0	0	0	0	0	4	0	0
C13H20orf96	3	0	0	0	0	4	2	0	0	2	1	7	0	0	0	7	0	2	0	4	0	0	0	2	0	0	0	0	0	0	0	0	0	0	2	0	0	0	0	0
C14H8orf33	8	0	5	1	10	6	5	11	2	0	1	14	6	2	6	1	4	1	6	0	3	3	0	4	5	3	7	7	6	11	13	0	11	3	0	0	14	5	15	11
C14H8orf34	0	1	0	1	0	0	0	1	0	0	0	0	0	0	2	8	0	0	0	0	0	1	2	6	0	0	0	0	0	0	0	1	1	2	3	4	5	1	2	11
C14H8orf37	167	117	102	139	95	171	118	71	115	185	76	228	197	200	206	242	138	203	158	211	149	168	159	110	309	449	201	237	290	296	286	295	170	197	139	174	222	207	192	241
C14H8orf59	21	6	8	5	12	18	4	4	8	10	3	26	12	12	13	20	16	22	30	21	17	20	10	17	13	35	9	13	9	26	18	8	28	10	13	20	26	43	39	27
C14H8orf76	389	270	201	247	277	298	209	208	284	372	194	547	423	383	463	516	389	558	464	520	614	377	508	454	396	768	325	459	544	455	723	508	391	446	393	451	297	390	905	429
C14H8orf82	0	3	0	3	0	2	4	7	0	2	0	1	0	1	9	1	0	0	1	0	3	0	0	4	1	2	0	1	0	0	0	0	3	1	0	3	6	1	4	4
C14H8orf88	11	18	13	14	7	22	15	21	9	12	5	25	0	8	8	15	11	31	19	25	18	17	27	32	8	17	0	14	7	6	4	10	18	36	45	42	41	42	52	37
C14H8orf89	8	9	5	3	0	6	2	26	2	1	8	2	0	1	10	3	0	0	3	6	2	0	3	4	3	3	3	5	1	15	16	1	1	13	3	9	13	3	10	6
C15H11orf1	3	2	4	2	1	2	0	1	9	1	3	2	10	13	0	3	0	5	8	1	4	1	4	1	4	14	3	13	1	9	3	10	1	4	4	9	6	3	12	11
C15H11orf16	383	377	278	315	319	391	214	272	314	324	230	616	486	384	554	546	609	560	697	521	775	550	721	500	315	518	214	322	417	603	449	340	553	592	588	891	653	629	1045	845
C15H11orf34	0	0	0	0	0	0	0	0	0	0	0	0	0	0	0	0	0	0	0	0	0	0	0	0	0	0	0	0	0	0	0	0	0	0	0	0	0	0	0	0
C15H11orf42	0	0	0	0	0	0	0	0	0	0	0	0	0	0	0	0	0	0	0	0	0	0	0	0	0	0	0	0	0	0	0	0	0	0	0	0	0	0	0	0
C15H11orf49	0	0	0	0	2	0	2	0	3	1	0	2	0	0	3	1	1	1	5	2	0	0	1	2	0	5	3	5	5	0	4	1	1	0	2	1	5	0	0	2
C15H11orf52	85	61	58	49	39	84	40	50	55	65	56	87	79	62	92	64	112	76	126	68	156	67	96	101	75	90	61	86	44	94	116	69	65	131	122	106	62	82	250	158
C15H11orf53	0	0	0	0	0	0	0	0	0	0	0	0	0	0	0	0	0	0	0	0	0	0	0	0	0	0	0	0	0	0	0	0	0	0	0	0	0	0	0	0
C15H11orf58	639	553	502	632	561	681	400	548	446	355	287	697	556	439	490	554	716	887	1091	912	1316	815	696	856	709	995	413	768	767	788	922	525	913	1089	1353	1481	1028	1336	1430	1295
C15H11orf65	0	0	0	0	0	0	0	0	0	0	0	0	0	0	0	0	0	0	0	0	0	0	0	0	0	0	0	0	0	0	0	0	0	0	0	0	0	0	0	0
C15H11orf71	8	8	5	18	5	6	2	10	9	14	8	12	14	18	24	17	13	15	15	11	23	27	19	12	19	69	24	30	16	34	22	31	11	19	20	52	10	35	50	34
C15H11orf74	31	30	14	25	22	33	18	33	15	26	16	30	20	33	13	33	37	24	53	18	30	51	40	28	47	40	16	30	35	45	63	29	58	66	39	39	64	50	95	31
C15H11orf87	0	0	0	0	0	0	0	0	0	0	0	0	0	0	0	0	0	0	0	0	0	0	0	0	0	0	0	0	0	0	0	0	0	0	0	0	0	0	0	0
C15H11orf88	0	3	0	1	0	0	0	0	0	0	0	0	0	2	1	0	0	0	0	0	0	1	2	0	0	0	0	0	0	0	0	0	0	0	0	0	0	1	1	0
C15H11orf91	0	0	0	0	0	0	0	0	0	0	0	0	0	0	0	0	0	0	0	0	0	0	1	0	0	0	0	0	0	0	1	0	0	0	0	0	0	0	0	0
C15H11orf94	0	0	0	0	0	0	0	0	0	0	0	0	0	0	0	0	0	0	0	0	0	0	0	0	0	0	0	0	0	1	0	0	0	0	0	0	0	0	0	0
C15H11orf96	0	0	0	0	0	0	0	0	0	0	0	0	0	0	0	0	0	0	0	0	0	0	0	0	0	0	0	0	0	0	1	0	0	0	0	0	0	1	0	0
C15H11orf97	0	0	0	0	0	0	0	0	0	0	0	0	0	0	0	0	0	0	0	0	0	0	0	0	0	0	0	0	0	0	0	0	0	0	0	0	0	0	0	0
C16H1orf100	0	0	0	0	0	0	0	0	0	0	0	0	0	0	0	0	0	0	0	0	0	0	0	0	0	0	0	0	0	0	0	0	0	0	0	0	0	0	0	0
C16H1orf105	6	2	2	2	7	3	4	1	2	0	0	3	10	2	8	4	0	2	6	5	3	8	8	3	2	16	0	14	4	4	7	0	8	2	7	11	2	2	9	0
C16H1orf112	85	122	99	86	99	98	114	99	120	154	114	205	102	209	162	133	209	184	216	183	310	242	213	185	114	176	155	221	245	208	345	205	220	284	164	227	179	249	296	180
C16H1orf115	0	3	0	0	0	0	0	0	0	0	0	0	0	0	0	0	0	0	0	0	0	0	0	0	0	0	0	0	0	0	0	0	0	0	0	0	0	0	0	0
C16H1orf116	2	10	3	8	1	0	0	0	10	1	0	2	0	0	4	0	1	5	6	2	5	4	5	5	0	0	0	3	1	0	0	0	0	9	0	0	0	0	0	0
C16H1orf158	0	0	0	0	0	0	0	0	0	0	0	0	0	0	0	0	0	1	0	0	0	2	0	0	0	0	0	0	0	0	0	0	0	0	0	0	0	0	0	0
C16H1orf159	0	2	0	0	3	0	0	0	0	0	0	0	0	0	0	1	0	0	0	0	4	0	0	0	0	0	0	0	0	0	0	0	5	0	0	0	0	2	1	1
C16H1orf167	0	0	0	0	0	0	1	0	0	0	0	0	0	0	0	1	1	1	1	0	0	0	0	1	0	2	2	0	0	1	0	0	1	0	0	1	1	0	1	2
C16H1orf174	0	0	0	0	0	0	0	0	0	0	0	0	0	3	0	0	0	0	0	0	0	0	0	0	0	0	0	0	0	3	0	0	5	2	3	0	1	0	3	0
C16H1orf21	35	27	9	59	22	21	7	21	16	7	4	28	13	27	17	24	19	16	47	15	38	26	29	17	17	57	20	56	23	66	39	10	37	49	12	40	17	44	60	64
C16H1orf53	2	5	9	7	3	4	3	3	0	3	0	2	3	5	10	9	2	0	2	1	11	4	7	9	3	20	2	11	10	20	16	25	13	5	1	13	8	13	29	26
C16H1orf74	39	24	16	24	17	37	22	26	24	26	7	56	69	40	39	19	39	51	42	59	81	42	53	30	34	30	18	8	18	39	35	31	33	45	37	47	39	32	43	30
C17H12orf43	31	23	17	25	16	18	10	8	10	12	6	12	11	13	21	30	24	24	24	36	55	34	24	15	29	39	19	29	16	14	41	14	33	44	57	56	50	75	74	59
C17H12orf49	160	171	140	134	68	148	99	138	50	57	33	60	91	138	177	164	82	76	98	65	132	215	223	172	151	214	118	221	206	207	219	172	248	211	266	346	183	251	518	375
C17H12orf65	29	6	22	23	25	18	11	7	18	21	11	33	27	18	23	15	25	26	13	27	40	22	24	15	28	36	28	34	37	24	32	26	52	41	48	55	41	60	83	34
C17H22orf15	0	0	0	0	0	0	0	0	0	0	0	0	0	0	0	0	0	0	0	0	0	0	0	0	0	0	0	0	0	0	0	0	0	0	0	0	0	0	0	0
C17H22orf31	0	0	0	0	0	0	0	0	0	0	2	0	0	0	0	0	0	0	1	0	0	0	0	0	0	0	0	0	2	0	0	0	0	0	0	0	1	4	0	0
C17H22orf39	5	17	2	7	0	4	4	2	0	0	0	0	5	6	21	10	2	0	0	1	15	7	9	10	5	11	4	6	11	10	7	9	12	10	13	25	10	15	31	12
C17H4orf33	193	159	86	110	125	158	97	65	107	167	133	197	186	179	212	193	125	113	182	170	203	143	204	137	638	721	335	415	438	485	534	390	211	171	181	206	133	202	346	150
C17H4orf45	0	0	0	0	0	0	0	0	0	0	0	0	0	0	0	0	0	0	0	0	0	0	0	0	0	0	0	0	0	0	0	0	0	0	0	0	0	0	0	0
C17H4orf46	2	0	0	0	4	0	0	0	0	0	0	0	1	0	0	0	0	0	0	0	8	0	0	0	14	6	0	0	0	0	0	0	4	0	3	0	6	4	0	7
C17H4orf51	0	0	0	0	2	0	0	0	0	0	1	1	0	0	0	0	0	0	0	0	0	0	2	0	1	0	1	0	0	0	0	0	0	0	0	0	0	0	0	1
C17H5orf52	4	0	0	0	1	1	0	5	0	5	0	3	0	0	1	6	0	0	1	1	1	2	1	2	0	5	1	0	0	1	0	0	2	1	3	0	1	0	1	2
C18H16orf46	113	139	110	106	87	173	67	70	43	106	41	142	78	89	140	124	137	127	133	152	264	172	187	121	141	284	58	139	117	132	188	120	116	131	221	221	175	194	255	187
C18H16orf70	295	355	239	418	355	394	266	271	243	345	179	367	237	340	432	290	520	637	596	666	894	582	588	468	385	348	180	302	467	334	399	252	315	291	158	468	395	440	461	465
C18H16orf74	71	64	48	128	13	47	45	90	12	19	18	37	41	60	172	263	6	16	27	25	58	59	113	172	67	139	46	131	161	172	272	358	47	89	89	92	105	115	300	251
C18H16orf78	0	0	0	0	0	0	0	0	0	0	0	0	0	0	0	0	0	0	0	0	0	0	0	0	0	0	0	0	0	0	0	0	0	0	0	0	0	0	0	0
C18H16orf86	0	0	0	0	0	0	0	0	0	0	0	0	0	0	0	0	0	0	0	0	0	0	0	0	0	0	0	0	0	0	0	0	0	0	0	0	0	0	0	0
C18H16orf87	9	10	14	16	9	7	8	7	4	9	10	7	17	9	12	27	9	6	5	13	27	26	17	27	56	6	22	38	22	39	27	16	18	42	38	54	26	27	48	19
C18H16orf95	0	0	0	0	0	0	0	0	0	0	0	0	0	0	3	0	0	0	0	0	0	0	0	0	0	0	0	0	3	0	0	0	0	0	0	0	0	0	0	0
C18H19orf12	26	29	29	61	20	33	11	24	25	12	5	36	10	22	42	29	17	7	48	9	74	79	43	14	8	86	17	57	44	70	25	32	29	34	46	55	82	65	94	60
C18H19orf18	0	0	0	0	0	0	0	6	4	0	0	0	0	0	4	0	0	2	0	2	0	0	0	0	0	0	0	0	3	0	2	0	3	0	0	3	0	7	0	0
C18H19orf33	0	0	0	0	0	0	0	0	0	0	0	0	0	0	0	0	0	0	0	0	0	0	0	0	0	0	0	0	0	0	0	0	0	0	0	0	0	0	0	0
C18H19orf47	29	29	15	17	13	15	9	26	0	1	8	16	24	24	33	17	10	1	22	16	25	28	19	22	44	76	26	26	16	56	39	23	25	30	28	45	30	36	19	36
C18H19orf48	17	15	28	27	15	31	22	19	4	3	15	33	53	39	32	28	4	4	49	37	53	31	39	24	27	64	46	27	44	62	41	29	21	20	37	42	17	18	26	32
C18H19orf54	31	13	21	33	17	30	14	16	45	22	26	51	35	53	49	32	14	24	21	16	34	16	32	34	22	73	18	32	55	58	62	23	21	40	38	35	41	27	69	42
C18H19orf73	0	0	0	0	0	0	0	0	0	0	0	0	0	0	0	1	0	0	0	0	0	0	0	0	0	0	0	0	0	0	0	0	0	0	0	1	0	0	0	1
C18H19orf81	0	1	0	0	0	0	0	0	0	0	1	0	0	0	0	0	0	0	3	1	1	5	0	0	0	0	0	1	0	0	0	0	1	3	1	0	0	1	0	0
C18H19orf84	11	10	9	5	6	10	8	10	2	4	4	2	9	2	13	4	2	6	24	15	10	12	8	12	8	14	6	23	10	8	7	11	10	9	12	13	2	20	14	19
C19H17orf100	1	0	0	1	0	0	0	0	0	0	0	4	0	0	1	0	0	0	0	0	0	0	0	0	0	0	0	1	0	0	0	0	0	0	0	0	0	0	0	2
C19H17orf107	2	0	1	1	0	0	0	0	0	0	0	0	1	0	0	0	0	0	0	0	3	0	0	0	0	2	0	1	1	0	0	0	0	0	0	0	0	3	0	0
C19H17orf113	89	132	105	138	114	124	82	78	137	159	99	182	187	176	161	214	207	199	331	201	289	268	234	182	195	210	113	181	161	244	181	151	125	163	171	350	230	272	355	168
C19H17orf47	0	0	0	0	0	0	0	0	0	0	2	0	0	0	0	0	0	0	0	0	0	0	0	0	0	0	0	0	0	0	0	0	0	0	0	0	0	0	0	0
C19H17orf49	277	267	238	265	216	232	144	245	235	287	190	379	352	337	407	463	286	333	382	400	512	352	400	330	524	1054	361	725	632	729	756	500	391	437	409	626	423	468	963	495
C19H17orf50	0	0	0	0	0	0	0	0	0	0	0	0	0	0	0	0	0	0	0	0	0	0	0	0	0	0	0	0	0	0	0	0	0	0	0	0	0	0	0	0
C19H17orf53	59	31	30	46	35	50	26	27	58	67	27	91	79	34	66	70	28	57	34	62	57	40	44	41	68	133	47	88	66	129	69	60	52	68	102	156	68	92	193	121
C19H17orf58	55	37	29	59	18	26	24	33	3	9	14	17	25	21	59	83	13	11	50	24	47	33	39	28	16	54	31	8	43	67	41	60	52	51	20	26	58	100	86	52
C19H17orf64	0	0	1	0	0	0	0	0	0	0	0	0	0	0	0	0	0	0	0	0	0	0	0	0	0	0	0	0	0	0	0	0	0	1	0	0	0	3	0	0
C19H17orf67	0	0	0	0	0	0	0	0	0	0	0	0	0	0	0	0	0	0	0	0	0	0	0	0	0	0	0	4	0	0	0	0	0	0	0	4	0	0	0	0
C19H17orf75	11	21	15	13	16	29	4	9	11	8	11	6	36	31	34	19	36	35	29	53	55	34	22	12	9	18	25	17	38	56	25	33	10	24	13	1	0	1	7	41
C19H17orf78	10	1	0	0	0	1	2	1	4	2	2	10	3	13	3	2	1	2	3	0	6	7	1	1	0	0	0	0	0	0	18	0	8	0	0	6	2	7	4	0
C19H17orf80	13	5	11	8	2	9	5	7	20	20	15	19	19	10	17	43	24	31	21	19	21	17	7	10	11	23	7	14	19	18	9	15	29	30	5	16	28	26	16	5
C19H17orf97	0	0	8	0	2	6	1	0	2	11	5	0	2	5	10	0	4	1	6	9	0	2	8	2	0	20	1	0	15	5	5	10	3	2	14	5	0	0	13	7
C19H17orf98	0	0	0	0	0	0	0	0	0	0	0	0	0	0	0	0	1	0	0	0	0	0	0	0	0	0	0	0	0	0	0	0	0	0	0	0	0	0	1	0
C1D	133	51	80	75	72	52	83	71	52	66	47	90	57	37	58	96	69	66	150	68	187	90	51	34	61	315	128	130	202	232	209	172	167	240	196	243	108	160	289	179
C1GALT1	23	18	21	11	0	0	22	17	4	0	1	0	11	23	35	44	6	14	5	0	16	16	19	19	10	94	28	13	18	48	43	37	15	12	51	60	85	98	113	97
C1GALT1C1	38	13	22	29	21	16	8	27	10	40	23	72	38	48	45	36	37	60	57	27	33	90	78	45	74	110	54	43	53	121	115	79	42	51	24	91	41	84	108	93
C1H21orf140	0	0	0	0	0	0	0	0	0	0	0	0	0	0	0	1	0	0	0	0	0	0	0	0	0	0	0	0	0	0	0	1	0	0	0	0	0	0	0	0
C1H21orf2	4	0	3	0	1	0	0	1	0	0	0	0	0	0	0	0	0	2	0	4	3	0	1	0	1	5	1	3	1	0	2	1	0	5	1	0	0	5	3	7
C1H21orf58	0	0	0	0	0	0	1	0	1	0	0	0	1	0	0	0	0	0	1	0	0	0	0	0	0	0	0	1	0	0	0	0	0	0	0	0	0	0	1	0
C1H21orf62	0	0	0	0	1	0	0	0	0	0	0	0	0	0	0	0	0	0	0	0	0	0	0	0	9	0	0	0	0	0	0	0	0	8	8	0	0	0	0	4
C1H21orf91	294	274	216	272	245	299	165	191	189	211	148	395	286	277	422	523	455	344	497	435	425	429	331	377	423	845	385	381	550	627	560	446	355	440	399	582	346	392	590	489
C1H3orf30	0	0	0	0	0	0	0	0	0	0	0	0	0	0	0	0	0	0	0	0	0	0	0	0	0	0	0	0	0	0	0	0	0	0	0	0	0	0	0	0
C1H3orf33	3	8	0	0	3	0	0	0	1	10	1	1	9	6	8	9	5	3	2	15	14	3	0	4	23	0	4	0	8	26	27	0	6	12	0	11	0	5	16	6
C1H3orf38	879	839	591	749	698	853	484	600	733	751	517	1246	1109	843	1129	1309	815	1066	1435	1111	1800	998	1099	850	1191	1791	827	1315	1447	1361	1602	1056	848	1183	936	1244	1117	932	1659	1179
C1H3orf52	0	0	2	0	13	0	0	3	0	14	5	11	0	14	15	1	12	19	1	8	1	5	3	7	0	8	20	5	2	8	4	16	22	9	0	15	18	17	28	6
C1H3orf58	0	0	0	0	0	0	0	0	0	0	0	0	0	0	0	0	0	0	0	0	0	0	3	0	22	1	0	1	0	5	0	0	0	0	0	0	0	5	0	8
C1H3orf70	14	50	13	28	7	25	37	11	4	15	8	0	1	17	18	22	1	0	17	3	30	31	42	39	19	57	26	25	41	12	15	32	54	29	26	46	65	38	109	86
C1H3orf80	0	0	0	0	0	0	0	0	0	0	0	0	0	0	0	0	0	0	0	0	0	0	0	0	0	0	0	0	0	0	0	0	0	0	0	0	0	0	0	0
C1H3orf85	0	0	0	0	0	0	0	0	0	0	0	0	0	0	0	0	0	0	0	0	0	0	0	0	0	0	0	0	0	0	0	0	0	0	0	0	0	0	0	0
C1QA	0	0	0	0	0	0	0	0	0	0	0	0	0	0	0	0	0	0	0	0	0	0	3	0	0	0	0	0	0	0	0	0	0	0	3	0	0	0	0	0
C1QB	0	0	0	0	0	0	0	0	0	0	0	0	0	0	0	0	0	0	0	0	0	0	0	0	0	0	0	0	0	0	0	0	0	0	0	0	0	0	0	0
C1QBP	370	403	283	367	9	243	172	263	6	9	6	25	431	448	512	550	16	21	25	28	290	458	438	416	312	437	216	273	376	350	492	322	468	484	640	739	567	724	1039	728
C1QC	0	0	0	0	0	0	0	0	0	0	0	0	0	0	0	0	0	0	0	0	0	0	0	0	0	0	0	0	0	0	0	0	0	0	0	0	0	0	0	0
C1QL1	0	0	0	0	0	0	0	1	0	0	0	0	0	0	0	0	0	0	0	0	0	0	0	0	0	0	0	0	0	0	0	0	0	0	0	0	0	0	0	0
C1QL2	0	0	0	0	0	0	0	0	0	0	0	0	0	0	0	0	0	0	0	0	0	0	0	0	0	0	0	0	0	3	0	2	0	0	0	0	0	0	0	0
C1QL3	0	4	1	4	2	0	2	0	1	0	0	4	0	5	0	4	0	9	2	2	4	0	5	6	8	10	7	7	8	0	2	3	6	1	17	5	2	3	5	9
C1QL4	0	0	1	0	0	4	0	0	0	0	0	0	0	2	1	1	0	0	0	0	10	0	0	0	0	6	0	3	5	1	4	1	2	4	5	0	0	0	3	2
C1QTNF1	0	0	0	0	0	0	0	0	0	0	0	0	0	1	0	0	0	0	0	0	0	0	0	0	0	0	0	0	0	0	0	0	0	0	0	0	0	0	0	0
C1QTNF12	0	0	0	0	0	0	0	0	0	0	0	0	0	0	0	0	0	0	0	0	0	0	0	0	0	0	0	0	0	0	0	0	0	0	0	0	0	0	0	0
C1QTNF2	0	0	0	0	0	0	0	0	0	0	0	0	0	0	0	0	0	0	0	0	0	0	0	0	0	0	0	0	0	0	0	0	0	0	0	0	0	0	0	0
C1QTNF3	0	0	0	0	0	0	0	0	0	0	0	0	0	0	0	0	0	0	0	0	0	0	0	0	0	0	0	0	0	0	0	0	0	0	0	0	0	0	0	0
C1QTNF4	0	0	0	0	0	0	0	0	0	0	0	0	0	0	0	0	0	0	0	0	0	0	0	0	0	0	0	0	0	0	0	0	0	0	0	0	0	0	0	0
C1QTNF5	0	0	0	0	0	0	0	0	0	0	0	0	0	0	0	0	0	0	0	0	0	0	0	0	0	0	0	0	0	0	0	0	0	0	0	0	0	0	0	0
C1QTNF6	1	0	0	0	0	0	0	0	0	0	0	0	0	0	0	0	0	0	0	0	0	0	0	0	0	0	0	0	0	0	0	0	0	0	0	0	0	0	0	0
C1QTNF7	0	0	0	0	0	0	0	0	0	0	0	0	0	0	0	0	0	0	0	0	0	0	0	0	0	0	0	0	0	0	0	0	0	0	0	0	0	0	0	0
C1QTNF8	0	0	0	0	0	0	0	0	0	0	0	0	0	0	0	0	0	0	0	0	0	0	0	0	0	0	0	0	0	0	0	0	0	0	0	0	0	0	0	0
C1QTNF9	2	0	0	0	0	0	0	0	0	0	0	0	0	0	0	0	0	0	0	0	0	0	0	0	0	0	0	0	0	0	0	0	0	0	0	0	0	0	0	2
C1R	0	0	0	0	0	0	0	0	0	0	0	0	0	0	0	0	0	0	0	0	0	0	0	0	0	0	0	0	0	0	0	0	0	0	0	0	0	0	0	0
C1RL	0	0	0	0	0	0	0	0	0	0	0	0	0	0	0	0	0	0	0	0	0	0	0	0	0	0	0	0	0	0	0	0	0	0	0	0	0	0	0	0
C1S	0	0	0	0	0	0	0	0	0	0	0	0	0	0	0	0	0	0	0	0	0	0	0	0	0	0	0	0	0	0	0	0	0	0	0	0	0	0	0	0
C2	0	0	0	0	0	0	0	0	0	0	0	0	0	0	1	0	0	0	0	0	0	0	0	0	0	0	0	0	0	0	0	0	0	0	0	0	0	0	0	0
C20H5orf22	252	204	140	176	137	189	112	81	186	209	129	275	247	300	303	290	186	236	319	278	262	234	252	195	332	410	291	297	319	440	458	316	271	299	326	439	325	185	340	330
C20H5orf34	162	224	141	241	207	210	133	99	191	135	124	245	217	207	235	177	264	175	265	193	251	254	292	151	292	728	289	386	371	419	390	319	195	297	188	193	166	113	326	213
C20H5orf47	23	6	15	17	24	21	21	12	22	21	13	33	12	28	28	39	25	26	34	28	45	25	16	14	30	61	42	46	35	40	53	24	13	50	33	13	12	18	57	22
C20H5orf49	0	0	0	0	0	0	0	0	0	0	0	1	1	0	0	0	0	0	3	3	0	0	0	0	0	0	1	0	0	3	0	0	0	0	0	0	4	6	0	3
C20H5orf51	648	734	457	592	623	763	339	535	413	400	297	776	961	565	833	626	758	808	1058	868	931	973	886	675	739	965	546	800	774	756	973	618	723	806	755	1238	725	1028	991	972
C20H5orf58	46	17	22	32	12	24	12	19	26	26	12	21	20	22	37	32	35	70	38	53	75	59	58	47	30	54	30	48	50	58	64	37	51	43	58	81	57	54	134	61
C21H14orf132	0	0	0	0	0	0	0	0	0	0	0	0	0	0	0	0	0	0	0	0	0	0	0	0	0	0	0	0	0	0	0	0	0	0	0	0	0	0	0	0
C21H14orf180	0	0	0	0	0	0	0	0	0	0	0	0	0	0	0	0	0	0	0	0	0	0	0	0	0	0	0	0	0	0	0	0	0	0	0	0	0	0	0	0
C21H14orf28	1	3	2	0	1	0	0	0	0	0	0	2	0	0	0	0	0	3	0	0	13	2	2	3	6	0	1	0	0	11	0	0	2	1	3	1	3	16	7	0
C21H15orf39	17	30	35	29	6	36	16	20	13	3	2	23	24	38	32	43	1	2	11	5	20	40	36	31	38	63	31	29	46	42	71	32	29	29	36	40	43	53	73	36
C21H15orf40	2	1	0	1	0	1	2	0	1	5	0	3	5	0	0	1	2	0	6	0	1	0	2	0	2	10	0	3	4	5	2	2	0	6	3	2	3	4	8	4
C22H3orf14	63	39	25	33	48	54	25	30	45	72	36	83	41	79	66	71	49	59	79	96	120	86	54	39	70	103	33	96	52	63	97	30	57	93	121	139	109	102	117	141
C22H3orf18	0	0	0	0	0	0	0	0	0	0	0	0	0	0	0	0	0	0	0	0	0	0	0	0	0	0	0	0	0	0	0	0	0	0	0	0	0	0	0	0
C22H3orf20	0	3	0	0	0	0	0	0	1	0	0	0	0	0	0	0	0	0	0	0	0	0	0	0	0	0	0	0	0	0	0	0	0	0	0	0	1	0	0	0
C22H3orf22	0	0	0	0	0	0	0	0	0	0	0	0	0	0	0	0	0	0	0	0	0	0	0	0	0	0	0	0	0	0	0	0	0	0	0	0	0	0	0	0
C22H3orf35	0	0	0	0	0	1	0.37	0	0	0.37	0	2	0	0	3	0	0	0	0.5	0	0.75	0	0.93	1.51	0	0.36	0	1.45	0	8	2	3.28	0	0	0.72	0	0	0	4.52	1.68
C22H3orf49	5	1	0	0	0	2	1	1	0	3	5	1	0	0	5	23	5	2	2	2	1	5	0	0	10	4	0	9	1	4	11	0	0	0	0	3	5	0	6	3
C22H3orf62	19	0	0	0	0	4	0	1	5	3	4	0	3	2	11	6	7	0	4	2	14	17	5	4	5	1	3	6	0	7	1	6	2	3	3	7	0	7	20	22
C22H3orf67	69	62	53	50	42	54	37	69	58	71	22	84	91	79	81	83	56	118	82	71	156	66	120	43	144	279	88	214	118	219	170	134	68	38	63	90	104	86	75	116
C22H3orf84	1	0	0	0	0	0	0	0	0	0	0	0	0	0	0	0	0	0	0	0	0	0	0	0	0	0	0	0	0	0	0	0	0	0	0	2	0	0	0	0
C23H6orf10	0	0	0	0	0	0	0	0	0	0	0	0	0	0	0	0	0	0	0	0	0	0	0	0	0	0	0	0	0	0	0	0	0	0	0	0	0	0	0	0
C23H6orf106	161	121	133	172	102	136	80	94	93	102	75	112	118	130	94	212	134	171	169	179	245	110	188	158	139	252	109	226	153	177	193	138	69	109	122	131	107	150	346	129
C23H6orf132	0	0	0	6	0	0	0	0	0	0	0	0	0	0	0	0	0	0	0	0	0	0	0	0	0	0	0	0	0	0	0	3	0	0	0	4	10	0	9	0
C23H6orf136	14	15	17	16	19	12	7	10	15	15	14	22	17	18	18	26	20	19	24	30	30	11	44	16	21	28	16	30	23	44	36	25	14	14	23	29	38	22	52	12
C23H6orf141	25	9	14	5	13	21	4	3	8	21	4	12	15	7	9	20	7	18	20	17	10	14	4	15	16	43	14	7	19	51	9	13	29	27	22	39	47	12	29	16
C23H6orf15	0	2	0	0	0	5	0	0	0	4	0	0	0	5	4	0	0	0	0	0	0	0	0	0	3	0	0	0	2	0	1	0	0	0	0	0	0	9	0	0
C23H6orf201	1	1	0	2	0	1	1	0	0	0	0	1	1	0	0	1	1	2	2	0	1	0	0	0	1	0	0	0	0	0	0	0	1	0	2	2	1	1	3	4
C23H6orf222	0	2	0	0	0	0	9	0	3	1	5	2	0	0	0	2	2	9	6	0	21	7	3	0	0	0	7	4	1	0	5	0	3	10	8	5	12	6	26	11
C23H6orf223	0	0	0	0	0	1	0	0	0	0	0	0	0	0	0	0	0	0	0	0	0	0	0	0	0	0	0	0	0	0	0	0	0	0	0	0	0	1	0	0
C23H6orf226	95	82	69	96	92	88	69	53	126	169	75	140	190	135	203	148	101	162	150	127	180	109	143	119	106	154	68	163	139	166	160	122	123	134	147	182	163	161	279	224
C23H6orf47	0	0	0	0	0	0	0	0	0	0	0	0	0	0	0	0	0	0	0	0	0	0	0	0	0	0	0	0	0	0	0	0	1	0	0	0	0	0	0	0
C23H6orf52	34	42	55	38	41	48	31	29	55	53	50	85	57	72	116	95	65	104	42	58	74	65	65	52	54	104	40	81	73	97	74	41	58	65	63	124	74	85	148	119
C23H6orf62	7	1	11	8	11	8	5	4	5	3	5	4	1	7	16	9	19	5	6	9	7	3	17	4	5	12	12	26	9	12	14	19	18	11	29	32	24	32	52	35
C23H6orf89	179	219	112	202	129	114	99	99	109	96	83	195	127	102	170	155	147	129	139	149	239	131	266	77	149	228	167	250	121	135	149	153	109	156	242	180	163	204	154	187
C24H18orf21	3	13	6	10	5	18	6	4	3	8	3	16	4	6	9	4	12	7	23	25	37	11	10	3	8	10	4	2	3	4	18	2	19	30	16	3	34	14	56	30
C24H18orf25	273	205	206	214	156	288	111	224	58	87	151	259	321	292	341	334	39	85	329	256	542	414	358	295	363	545	251	240	473	232	419	316	259	329	317	300	343	360	336	341
C24H18orf32	758	706	560	810	556	620	502	555	566	695	525	1034	816	827	1011	1035	886	835	884	845	1030	789	743	646	1180	1657	920	1104	1240	1372	1578	1054	924	1077	1239	1480	1096	1389	1864	1150
C24H18orf54	46	23	52	23	9	30	21	2	54	31	33	61	34	37	61	23	53	93	60	65	68	78	68	52	74	26	38	49	17	7	66	60	27	72	28	77	57	86	28	84
C24H18orf63	6	4	11	13	14	21	10	2	3	8	3	15	8	13	6	13	5	29	50	5	11	38	34	49	21	30	16	4	13	9	6	18	17	34	14	29	34	20	8	8
C25H16orf45	0	2	0	0	0	0	0	1	0	0	0	0	0	0	0	0	0	0	0	0	0	0	0	0	0	1	0	0	0	0	0	0	1	0	0	0	0	0	0	0
C25H16orf54	0	0	0	0	1	0	0	0	0	0	0	0	0	0	0	0	0	0	0	0	0	0	0	0	0	0	0	0	0	0	0	0	0	0	0	0	0	0	0	0
C25H16orf58	0	1	0	0	0	0	1	1	2	0	0	1	0	0	3	0	3	0	3	0	2	0	6	1	0	0	0	0	0	0	0	0	0	1	0	0	4	0	2	1
C25H16orf71	1	0	2	2	3	0	0	4	0	0	0	0	0	0	0	3	0	1	3	4	6	2	5	1	0	0	2	5	3	6	8	2	2	2	5	5	0	5	0	0
C25H16orf72	51	4	15	51	15	37	5	15	8	18	5	18	28	22	21	30	25	33	68	21	23	21	5	33	21	61	8	0	41	16	64	12	44	40	35	52	22	11	52	43
C25H16orf82	0	0	0	0	0	0	0	0	0	0	0	0	2	0	1	54	0	0	0	0	0	0	0	0	0	0	0	0	0	0	0	0	0	0	0	0	0	0	0	0
C25H16orf89	0	1	0	0	0	0	4	0	0	3	0	7	0	0	1	0	0	1	0	0	0	0	1	0	0	0	0	0	0	0	0	0	0	0	0	0	0	0	0	0
C25H16orf90	0	0	0	0	0	0	0	0	0	0	0	0	0	0	0	0	0	0	0	0	0	0	0	0	0	0	0	0	0	0	0	0	0	0	0	0	0	0	0	0
C25H16orf91	52	70	45	45	8	31	55	53	5	11	4	8	52	28	35	43	6	15	19	9	32	40	45	69	68	129	39	71	78	101	100	89	87	89	90	142	79	86	112	76
C25H16orf92	0	0	0	0	0	0	0	0	0	0	0	0	0	0	0	0	0	0	0	0	0	0	0	0	0	0	0	0	0	0	0	0	0	0	0	0	0	0	0	0
C25H16orf96	2	0	1	3	4	2	1	0	0	0	0	1	0	3	3	0	0	0	2	1	2	0	3	3	10	0	1	4	0	5	1	0	1	4	0	1	9	6	4	9
C25H7orf26	46	22	15	20	9	27	2	36	4	14	15	18	16	16	26	36	17	24	9	14	24	30	28	18	31	57	27	39	13	41	43	29	17	24	27	24	35	17	120	53
C25H7orf43	2	1	7	20	4	0	7	16	7	9	4	8	1	2	18	34	1	5	2	6	6	9	22	17	5	12	4	17	6	16	46	32	0	5	3	5	4	1	27	8
C25H7orf50	10	7	4	6	9	11	6	12	1	1	7	9	18	6	12	9	1	0	9	12	7	25	12	12	9	9	2	9	5	12	16	10	13	18	10	15	9	11	34	17
C25H7orf61	0	0	0	0	0	0	0	0	0	0	0	0	0	0	2	0	0	0	0	0	0	0	1	0	0	0	0	0	0	0	0	0	0	0	0	0	0	0	4	0
C26H10orf120	0	0	0	0	0	0	0	0	0	0	0	0	0	0	0	0	0	0	0	0	0	0	0	0	0	0	0	0	0	0	0	0	0	0	0	0	0	0	0	0
C26H10orf143	35	37	32	45	37	56	33	33	20	39	21	59	65	59	80	85	16	16	31	38	69	47	62	37	103	188	59	133	123	130	133	83	63	72	79	119	76	74	162	62
C26H10orf62	3	9	3	2	1	6	5	4	9	8	1	3	8	6	4	2	5	2	12	4	8	15	7	2	17	0	5	5	5	5	2	2	9	1	3	22	12	1	9	13
C26H10orf82	0	0	0	0	0	0	0	0	0	0	0	0	0	0	0	3	0	0	0	0	0	0	0	0	0	0	0	0	0	0	0	0	0	0	0	5	0	0	0	1
C26H10orf88	13	24	24	25	28	33	6	7	20	13	12	22	30	25	24	35	36	14	39	25	57	35	30	18	24	50	11	39	47	12	64	58	27	22	29	25	6	43	52	37
C26H10orf90	333	204	174	208	188	268	146	159	212	265	165	436	402	352	441	429	241	373	291	292	366	335	273	190	299	448	221	371	352	373	442	308	358	308	306	418	383	450	476	542
C26H6orf52	0	0	0	0	0	0	0	0	0	0	0	0	0	0	0	0	0	0	1	0	0	1	0	0	0	0	0	0	0	0	0	0	0	0	0	2	0	0	2	0
C27H4orf47	2	4	0	0	9	2	0	1	0	8	5	0	0	0	1	0	0	0	30	0	0	5	0	7	1	0	13	5	2	5	2	3	0	2	7	2	12	12	9	1
C27H8orf48	5	3	1	0	3	8	2	6	4	0	1	0	0	3	6	0	2	0	7	4	5	9	0	0	0	0	0	0	0	0	3	0	4	0	0	4	2	0	0	11
C28H10orf105	0	0	0	0	0	0	0	0	0	0	0	0	0	0	0	0	0	0	0	0	0	0	0	0	0	0	0	0	0	0	0	0	0	0	0	0	0	0	0	0
C28H10orf53	0	0	0	0	0	0	0	0	0	0	0	0	0	0	0	0	0	0	0	0	0	0	0	0	0	0	0	0	0	0	0	0	0	0	0	0	0	0	0	0
C28H10orf71	0	0	0	0	0	0	0	0	0	0	0	0	0	0	0	0	0	0	0	0	0	0	0	0	0	0	0	0	0	0	0	0	0	0	0	0	0	0	0	0
C28H10orf99	0	0	0	0	0	0	0	0	0	0	0	0	0	0	0	0	0	0	0	0	0	0	0	0	0	0	0	0	0	0	0	0	0	0	0	0	0	0	0	0
C28H1orf131	130	132	64	112	142	98	80	93	145	193	99	209	163	204	145	228	156	157	174	196	272	214	185	160	161	317	115	112	206	165	283	175	155	198	283	297	182	208	316	229
C28H1orf198	7	13	3	0	0	1	0	7	1	0	2	17	12	1	14	7	0	2	8	8	7	13	5	14	13	1	9	12	12	14	24	9	7	8	11	14	8	7	32	5
C29H11orf24	19	47	22	34	3	9	13	23	2	0	1	8	19	28	57	75	0	1	2	1	16	42	28	23	22	24	20	45	39	39	36	29	38	41	72	58	54	50	84	77
C29H11orf54	8	0	0	3	0	0	0	0	0	0	2	1	0	0	0	0	0	0	2	7	0	0	11	0	0	15	3	0	12	18	9	18	9	1	0	0	0	13	52	2
C29H11orf68	0	0	0	4	0	1	0	4	0	0	0	0	0	0	2	6	0	6	0	0	0	0	0	0	0	0	0	0	0	0	0	2	3	0	0	0	0	0	0	7
C29H11orf80	37	33	17	47	28	10	10	13	19	21	21	32	30	26	24	56	38	26	32	27	68	18	22	11	51	26	40	44	42	73	40	21	6	10	43	40	22	46	16	33
C29H11orf86	0	0	1	0	2	0	2	0	0	0	0	0	0	2	1	0	2	2	0	3	0	0	0	0	0	0	2	0	1	2	1	0	1	0	0	0	0	0	0	0
C29H11orf95	3	0	5	0	0	0	0	1	0	0	0	0	0	0	5	0	0	0	0	0	0	1	0	3	0	0	0	2	0	0	0	6	0	0	0	3	0	0	2	0
C29H11orf98	893	778	651	860	761	765	506	659	660	824	540	1143	875	872	1025	1133	813	1103	1107	1170	1576	994	1216	1046	811	1404	580	1278	1182	1240	1441	929	1019	1218	1246	1573	1103	1227	2229	1597
C2CD2	1	0	2	7	0	0	5	6	0	0	0	0	0	0	0	4	0	0	0	0	0	2	3	2	0	0	0	0	0	2	5	1	1	2	1	0	0	4	0	4
C2CD2L	12	10	7	17	4	11	3	0	2	0	0	12	0	14	16	3	6	4	0	0	0	21	32	12	1	20	5	0	19	18	24	16	5	12	28	11	1	13	30	14
C2CD3	14	14	13	9	9	8	15	6	6	7	2	16	9	9	15	11	13	6	8	21	19	35	9	10	4	22	7	14	9	15	13	8	21	5	25	15	34	6	17	14
C2CD4B	0	0	0	0	0	0	0	0	0	0	0	0	0	0	1	0	0	0	0	0	0	0	0	0	0	0	0	0	0	0	0	0	0	0	0	0	0	0	0	0
C2CD4C	0	0	0	0	0	0	0	0	0	0	0	0	0	0	0	0	0	0	0	0	0	0	0	2	0	0	0	0	0	0	0	0	0	0	0	0	0	0	0	0
C2CD4D	0	0	0	0	0	0	0	0	0	0	0	0	0	0	0	0	0	0	0	0	0	0	0	0	0	0	0	0	0	0	0	0	0	0	1	0	0	0	0	0
C2CD5	70	68	79	82	33	65	48	88	131	95	57	134	92	103	165	94	50	87	141	107	94	113	78	67	181	470	206	296	195	228	307	222	93	94	83	100	94	110	78	115
C2CD6	0	0	0	0	0	0	0	0	4	0	0	0	0	0	0	0	0	0	0	0	19	0	0	0	0	0	0	9	0	0	0	0	0	0	0	2	0	12	0	1
C2H2orf66	370	367	223	319	286	307	255	232	259	275	205	426	307	359	406	301	271	340	383	339	475	333	412	317	239	435	179	354	398	372	577	275	428	568	585	678	538	486	959	606
C2H2orf69	57	45	18	60	23	53	43	63	34	36	33	91	128	74	60	112	8	11	83	60	135	62	127	32	93	127	93	61	41	69	110	60	86	49	39	14	97	56	87	79
C2H2orf72	0	0	0	0	0	0	0	0	0	0	0	0	0	0	0	0	0	0	0	0	0	0	0	0	0	0	4	12	0	0	0	0	0	0	0	0	0	0	0	0
C2H2orf76	22	37	38	41	30	49	6	43	26	47	38	78	53	53	70	82	38	65	74	73	87	39	53	83	79	72	38	71	130	56	159	68	79	74	99	128	108	107	142	127
C2H2orf80	36	25	32	33	19	22	10	16	35	7	7	30	34	16	35	14	18	33	45	28	20	22	21	28	82	144	39	101	77	45	97	45	29	30	20	26	30	67	70	30
C2H2orf88	1	0	0	8	0	0	0	0	1	9	0	4	0	0	0	0	0	0	0	0	0	1	0	0	0	0	0	0	0	2	9	11	9	0	0	0	0	4	0	0
C3	0	0	0	0	0	0	0	0	0	0	0	0	0	0	0	0	0	0	0	0	1	0	0	0	0	0	0	0	0	0	0	0	0	0	0	0	0	0	0	0
C3AR1	0	0	0	0	0	0	0	0	0	0	0	0	0	0	0	0	0	0	0	0	0	0	0	0	0	0	0	0	0	0	0	0	0	0	0	0	0	0	0	0
C3H1orf109	30	32	40	63	39	37	25	9	8	27	19	38	18	22	46	33	33	50	46	51	56	63	39	71	31	42	33	47	31	14	54	14	70	67	41	70	45	41	66	28
C3H1orf123	53	24	39	20	26	45	26	23	36	31	25	49	37	30	63	59	36	61	52	54	56	23	46	38	33	32	22	49	46	51	53	23	36	45	65	87	43	40	117	61
C3H1orf141	0	0	0	0	0	0	0	0	0	0	0	0	0	0	0	0	0	0	0	0	0	0	0	0	0	0	0	0	0	0	0	0	0	0	0	0	0	0	0	0
C3H1orf146	4	2	2	4	5	11	0	1	5	3	0	2	0	0	3	9	5	6	6	7	1	2	4	4	1	2	3	0	5	3	4	5	13	19	8	18	9	16	38	27
C3H1orf162	0	0	0	1	0	0	0	0	0	0	1	0	0	0	0	0	0	0	0	0	0	0	2	0	0	0	1	0	0	0	0	2	0	0	0	0	0	0	0	0
C3H1orf185	0	0	0	0	0	0	0	0	0	0	0	0	0	0	0	0	0	0	0	0	0	0	0	0	0	0	0	0	0	0	0	0	0	0	0	0	0	0	0	0
C3H1orf189	0	0	0	0	0	0	0	3	0	0	0	0	4	0	0	0	0	0	0	2	0	0	0	2	0	0	0	0	0	0	3	0	0	0	0	0	0	0	9	0
C3H1orf194	0	6	1	0	4	1	0	0	0	0	1	4	0	0	5	0	0	3	0	1	0	0	0	3	0	0	1	0	2	1	2	0	2	1	3	1	2	0	7	0
C3H1orf210	1	10	1	3	3	4	0	0	0	5	5	0	11	0	2	0	7	0	15	1	20	2	0	5	0	0	0	0	2	0	4	0	0	5	0	19	9	0	0	6
C3H1orf216	4	0	0	0	0	0	0	0	0	2	0	0	0	0	0	0	0	0	0	0	9	0	0	0	0	0	0	0	0	4	0	0	0	0	0	0	0	0	0	0
C3H1orf226	3	0	10	15	3	2	1	1	3	5	0	2	0	16	13	32	17	0	3	6	11	12	8	13	16	10	0	17	12	7	17	2	6	6	0	2	17	0	12	10
C3H1orf43	119	150	156	160	138	125	107	105	137	156	81	225	228	175	239	234	175	174	232	142	319	225	200	264	185	133	110	199	213	211	190	136	109	222	248	203	163	133	352	277
C3H1orf50	35	16	18	19	25	19	11	7	23	31	19	42	37	28	29	15	17	26	26	46	33	32	9	16	20	28	19	30	39	27	61	39	53	23	29	37	39	47	39	45
C3H1orf52	0	11	9	8	5	1	3	0	2	1	1	18	20	6	10	32	15	3	28	6	14	22	18	8	11	4	13	8	3	11	18	14	8	10	10	42	46	17	48	31
C3H1orf54	0	0	0	0	0	0	0	0	0	0	0	0	0	0	0	0	0	0	3	0	0	1	0	0	0	0	0	0	0	0	0	0	0	0	0	0	0	0	0	6
C3H1orf56	2	2	1	1	0	2	0	1	0	0	0	0	1	1	3	6	3	3	9	3	1	1	5	2	8	5	0	4	3	3	0	0	0	1	5	9	0	1	7	0
C3H1orf68	0	0	0	0	0	0	0	0	0	0	0	0	0	0	0	0	0	0	0	0	0	0	0	0	0	0	0	0	0	0	0	0	0	0	0	0	0	0	0	0
C3H1orf87	0	0	0	0	0	0	0	0	0	0	0	0	0	0	0	0	0	0	0	0	6	0	0	0	0	0	0	0	0	0	0	0	0	0	0	0	0	0	0	0
C3H1orf94	0	0	0	0	0	0	0	0	0	0	0	0	0	0	0	0	0	0	0	0	0	0	0	0	0	0	0	0	0	0	0	0	0	0	0	0	0	1	0	0
C3H2orf54	0	0	0	0	0	0	0	0	0	0	0	0	0	0	0	0	0	0	0	0	0	0	0	0	0	0	0	0	0	0	0	0	0	0	0	0	0	0	0	0
C4A	0	0	0	0	0	0	0	0	0	0	0	0	0	0	0	0	0	0	0	0	0	0	0	0	0	0	0	0	0	0	0	0	0	0	0	0	0	0	0	0
C4BPA	0	0	0	0	0	0	0	0	0	0	0	0	0	0	0	0	0	0	0	0	0	0	0	0	0	0	0	0	0	0	0	0	0	0	0	0	0	0	0	0
C4BPB	0	0	0	0	0	0	0	0	0	0	0	0	0	0	0	0	0	0	0	0	0	0	0	0	0	1	0	0	0	0	0	0	0	0	0	0	0	4	0	0
C4H7orf25	244	247	144	191	170	200	182	219	185	186	162	254	201	237	310	351	198	251	355	317	368	301	320	265	253	341	170	163	219	248	365	179	321	260	258	313	250	252	434	273
C4H7orf31	76	63	45	35	71	64	26	16	78	31	19	78	35	48	28	47	85	63	61	72	81	58	57	28	22	82	42	51	85	50	72	24	26	46	83	20	129	39	73	58
C4H7orf57	0	20	0	8	1	4	7	13	14	12	11	10	6	1	3	28	11	5	18	2	22	14	14	19	31	15	23	27	35	30	35	14	3	11	0	15	31	16	27	17
C5	14	20	19	29	15	17	7	4	20	31	11	36	8	20	25	22	25	0	12	43	53	7	33	22	10	0	10	39	37	25	34	25	49	35	20	40	52	85	18	35
C5AR1	0	0	0	0	1	0	0	0	0	0	0	0	8	0	0	0	1	0	0	2	0	0	0	0	0	0	0	0	0	0	9	7	0	0	0	0	0	0	0	0
C5AR2	0	0	0	0	0	0	0	0	0	0	0	0	0	0	0	0	0	0	0	0	0	0	0	0	0	0	0	0	0	0	0	0	0	0	0	0	0	0	0	0
C5H12orf10	14	11	7	13	6	6	4	0	7	18	11	10	19	36	12	10	15	16	5	18	19	9	18	10	26	19	9	21	20	0	22	20	8	7	1	13	7	18	29	18
C5H12orf29	19	52	26	41	31	27	10	50	20	38	15	58	42	47	58	87	43	35	51	45	30	41	73	46	29	65	23	79	53	96	78	19	33	21	61	46	51	14	27	60
C5H12orf4	259	174	129	182	166	172	84	183	196	212	133	231	154	281	419	353	174	249	185	248	241	287	218	185	216	268	178	183	343	311	384	255	246	218	307	315	114	151	425	264
C5H12orf40	70	72	33	79	42	86	88	45	112	77	60	148	73	110	112	90	118	88	91	130	126	81	43	95	158	238	121	53	162	135	192	116	54	121	45	68	53	94	128	72
C5H12orf42	0	0	0	0	0	0	0	0	0	0	0	0	0	0	0	0	0	0	0	0	0	0	0	0	0	0	0	0	0	0	0	0	0	0	0	0	0	0	0	0
C5H12orf45	72	55	58	51	35	65	62	22	70	97	67	116	91	148	129	160	59	74	169	83	152	150	84	78	126	238	149	76	192	187	252	115	102	76	112	173	79	87	200	91
C5H12orf50	0	0	0	0	0	0	0	3	0	2	2	6	0	0	0	0	2	3	3	0	0	0	18	0	16	0	1	4	6	2	7	0	8	4	0	0	0	0	0	0
C5H12orf54	0	0	0	0	0	0	0	0	0	0	0	0	0	0	0	0	0	0	0	0	0	0	0	0	0	0	0	0	0	0	0	0	0	0	0	0	0	0	0	0
C5H12orf56	0	0	0	0	0	0	0	2	0	0	0	0	0	0	4	0	0	0	0	0	0	0	0	0	0	0	0	0	0	0	10	0	0	0	0	0	0	0	0	0
C5H12orf57	21	15	6	11	16	11	8	13	8	20	8	31	14	22	35	22	23	33	35	27	47	16	24	20	60	44	28	44	40	30	36	44	17	14	23	29	28	16	45	23
C5H12orf60	3	0	0	3	0	0	0	7	6	0	0	2	0	0	0	0	0	0	3	0	1	0	0	0	0	0	8	5	0	5	4	7	0	1	0	3	1	0	1	10
C5H12orf66	13	12	8	6	9	6	6	3	9	10	4	9	1	6	8	3	7	1	22	10	6	8	12	8	5	25	5	1	11	7	7	9	11	6	2	1	1	1	9	14
C5H12orf71	0	0	0	0	0	0	0	0	0	0	0	0	0	0	0	0	0	0	0	0	0	0	0	0	0	0	0	0	0	0	0	0	0	0	0	0	0	0	0	0
C5H12orf73	47	33	42	39	25	36	22	24	36	49	26	58	46	40	51	80	21	34	58	62	74	51	24	26	105	112	43	75	79	56	78	58	32	65	60	78	60	68	95	78
C5H12orf75	30	11	15	14	4	24	7	15	0	3	6	3	22	7	15	12	0	0	4	4	17	11	28	22	18	42	14	29	19	27	14	19	26	19	52	19	19	27	44	28
C5H12orf80	0	0	0	0	0	0	0	0	0	0	0	0	0	0	0	0	0	0	0	0	0	0	0	0	0	0	0	0	0	0	0	0	0	0	0	0	0	0	0	0
C5H22orf23	0	0	0	0	0	0	1	0	0	0	0	0	1	3	0	0	0	0	0	0	2	0	0	0	2	0	1	1	0	0	0	0	0	0	0	0	0	0	0	0
C5H22orf46	135	166	183	195	145	169	121	104	94	73	62	164	109	117	138	155	133	284	204	240	207	274	255	180	109	135	82	221	120	160	196	137	273	262	310	287	310	293	528	349
C6	0	0	0	0	0	0	0	0	0	0	0	0	0	0	0	0	0	0	0	0	0	0	0	0	0	0	0	0	0	0	0	0	0	0	0	0	0	0	0	0
C6H4orf17	16	21	22	18	17	18	12	12	17	42	16	23	24	21	34	32	21	23	15	30	45	27	40	29	39	27	13	5	51	33	25	30	22	32	58	29	32	16	68	68
C6H4orf19	9	0	2	2	1	0	0	11	0	2	5	0	0	0	0	0	0	0	0	0	0	4	5	9	0	0	8	0	0	0	7	5	6	0	9	4	8	24	9	6
C6H4orf3	82	91	38	114	99	113	62	100	28	66	24	136	162	69	83	123	93	91	136	161	190	169	126	107	138	200	107	133	79	177	123	124	172	114	122	172	126	266	133	214
C6H4orf36	1	0	0	0	3	0	2	1	0	0	1	0	0	0	0	0	1	7	0	0	1	0	0	2	1	1	0	0	0	0	1	0	0	1	7	0	10	8	0	2
C6H4orf48	0	0	0	0	2	0	0	0	0	0	0	0	0	0	0	0	0	0	0	0	0	2	0	0	0	0	0	0	0	0	0	0	0	0	0	0	0	0	1	0
C6H4orf50	0	2	0	0	0	1	0	0	0	0	2	1	0	0	0	0	0	0	1	0	0	4	0	0	0	0	9	0	0	0	4	0	0	0	0	0	0	0	0	0
C6H4orf54	0	0	0	0	0	0	0	0	0	0	0	4	0	0	0	0	0	0	0	0	0	0	0	0	0	0	0	0	0	0	0	0	0	0	0	0	0	3	0	0
C7	0	0	0	0	0	0	3	0	0	0	0	0	0	0	0	0	0	0	0	0	0	0	0	0	0	0	0	4	0	0	0	0	0	0	0	0	0	9	0	4
C7H19orf24	2	10	3	6	6	6	4	5	4	5	3	0	4	4	1	7	2	7	9	26	3	4	12	6	11	7	5	3	13	7	11	3	5	6	1	10	6	6	4	1
C7H19orf25	0	0	0	5	1	0	0	0	0	2	1	0	0	0	0	0	0	5	0	6	4	0	0	0	0	3	0	4	0	0	0	0	3	0	0	1	0	0	9	0
C7H19orf38	0	2	3	3	0	2	0	0	1	2	0	4	0	2	1	0	0	0	0	1	0	0	4	0	0	0	0	8	3	7	7	0	0	1	3	0	1	0	0	1
C7H19orf44	28	15	17	24	7	27	2	22	23	27	18	40	1	21	12	18	18	15	38	12	22	32	25	18	24	51	25	32	27	28	51	39	17	10	34	9	19	23	48	10
C7H19orf53	1	3	14	16	3	7	0	7	18	8	5	16	9	13	14	16	10	17	24	22	10	5	15	10	11	10	0	9	15	12	23	25	7	2	10	11	7	9	19	21
C7H19orf57	64	30	29	30	27	38	28	28	17	16	18	37	32	31	50	47	71	62	76	25	15	28	50	25	67	59	14	20	57	57	39	32	39	29	24	45	43	28	71	37
C7H19orf66	12	8	7	13	5	6	5	11	10	1	1	10	17	8	16	9	5	2	5	17	16	21	16	14	8	16	2	11	11	13	10	2	1	7	11	18	9	18	0	20
C7H19orf67	38	28	33	27	16	19	10	15	11	17	23	35	25	32	40	31	12	22	41	29	48	35	26	22	19	19	14	34	48	36	44	21	20	21	34	65	26	27	42	51
C7H19orf70	11	4	1	3	7	4	3	2	7	2	6	12	3	7	3	12	3	6	8	6	6	4	5	1	8	5	7	6	7	23	11	8	6	8	5	8	6	2	15	13
C7H19orf71	0	0	0	0	0	0	0	0	0	0	0	0	0	0	0	0	0	0	0	0	0	0	0	0	0	0	0	0	0	0	0	0	0	0	0	0	0	0	0	0
C7H1orf35	48	49	24	54	45	48	34	40	37	48	24	59	50	36	78	58	53	73	48	47	103	57	57	55	51	56	51	68	92	76	87	71	48	75	38	91	57	63	167	62
C7H5orf15	17	5	22	16	17	21	8	21	23	13	10	28	38	26	64	20	31	11	36	31	42	46	49	28	13	21	12	16	27	59	36	4	20	53	22	12	35	24	55	34
C7H5orf24	27	22	22	29	37	51	27	21	36	47	14	38	26	27	38	67	34	87	80	76	85	115	52	58	51	69	22	66	52	72	52	30	30	21	43	51	38	44	32	75
C7H5orf30	10	7	8	9	0	7	3	0	0	0	0	0	0	0	0	0	0	0	3	14	1	18	5	3	0	0	0	0	0	0	4	0	6	11	0	17	17	28	29	19
C7H5orf46	0	0	0	0	0	0	0	0	0	0	0	0	1	0	0	0	0	0	0	0	0	0	0	0	0	0	0	0	0	0	0	0	0	0	0	0	0	0	0	0
C7H5orf63	8	2	3	1	2	0	1	5	8	3	1	8	8	14	9	22	13	5	4	22	4	26	6	1	10	30	10	12	19	13	19	30	8	4	0	12	0	0	13	21
C8A	0	0	0	0	0	0	0	0	0	0	0	0	0	0	0	0	0	0	0	0	0	0	0	0	0	0	0	0	0	0	0	0	0	0	0	0	0	0	0	0
C8B	10	1	3	9	0	9	1	4	6	3	2	4	1	0	6	5	7	2	7	11	1	16	3	0	0	8	7	0	7	9	4	3	5	5	11	14	5	11	8	6
C8G	0	0	0	0	1	0	0	0	0	0	0	0	0	0	0	1	0	0	0	0	0	0	0	0	0	0	0	0	0	0	0	0	0	0	0	0	2	0	0	0
C8H8orf58	17	16	10	2	2	4	0	6	7	15	14	16	33	15	14	23	15	11	40	20	28	27	17	18	14	27	13	7	21	30	10	11	13	12	24	18	10	13	23	10
C8H8orf74	0	0	0	0	0	0	0	0	0	0	0	0	0	0	0	0	0	0	0	0	0	2	0	0	0	0	0	0	0	0	0	0	0	0	0	0	0	0	0	0
C8H9orf131	0	0	0	0	0	0	0	0	0	0	0	0	0	7	0	0	0	0	0	0	0	0	0	12	0	0	0	0	0	0	4	0	0	0	0	0	0	0	0	0
[truncated: 26,336 more rows]

## Sheet: Fig.3d_e
Genes	Low_1	Low_2	Low_3	High_1	Low_4	Low_5	Low_6	High_2	Low_7	Low_8	Low_9	Low_10	Low_11	Low_12	High_3	High_4	Low_13	Low_14	Low_15	Low_16	Low_17	Low_18	High_5	High_6	Low_19	Low_20	Low_21	Low_22	Low_23	Low_24	High_7	High_8	Low_25	Low_26	Low_27	Low_28	Low_29	High_9	High_10	High_11
EPHA2	9.09	2.74	2.27	8.13	1.86	2.17	3.82	8.34	0.77	2.33	0	1.39	1.56	2.13	4.3	3.46	4.05	0	1.11	1.15	0.18	3.21	1.93	5.61	0.76	1.17	0.26	2.09	0.67	3.36	3.07	3.84	3.88	0.87	4.07	4.85	3.96	2.42	7.17	3.41
HRAS	7.19	0	8.55	17.18	0	2.68	4.15	28.01	0	0	2.49	3.01	2.24	7.29	15.96	24.25	0	1.27	1.94	1.11	0	4.96	11.34	27.11	7.84	2.05	3.35	6.29	5.09	10.02	21.23	16.12	1.05	7.36	3.54	10.59	9.06	4.05	24.05	28.97
JUN	0	1.89	3.92	7.82	0	0	3.96	13.35	0	0	0	0	0	0.55	6.23	8.85	0	0.55	0.92	0.48	0	0	9.75	7.19	0	0.24	2.66	0.67	4.5	9.69	5.49	8.72	1.51	0.9	2.95	4.03	10.79	14.27	8.83	18.05
JUND	0	0	2.66	0	0.87	0.72	1.12	19.52	0.9	0	0	0	2.42	0	1.51	8.57	0.73	2.47	1.56	0	2.51	1.07	1.5	6.25	0.44	0	0.6	0.38	0.39	0.68	0.65	3	2.84	2.04	0.95	4.56	1.46	0.87	9.7	6.4
MAP2K2	5.6	2.32	2.84	5.16	0.46	2.36	2.43	9.63	0	2.91	2.65	3.34	0	1.35	1.62	4.13	1.58	1.34	0.57	1.17	3.63	0	2.17	3	0	0.3	0	0	2.55	1.11	2.82	5.58	4.93	0.55	0	3.72	0.53	2.84	3.71	8.25
MAP2K3	27.11	43.19	105.47	129.53	11.67	12.38	139.14	122.83	20.81	9.06	24.07	6.78	16.79	62.19	132.3	188.85	13.68	11.59	13.05	22.17	24.28	18.19	121.5	161.93	26.19	43.99	59.73	71.25	102.98	157.64	173.57	217.55	18.58	48.58	91.38	92.55	93.53	97.72	107.39	112.49
MAP2K4	12.57	10.98	15.26	34.82	13.41	18.72	12.16	92.76	21.12	6.6	13.93	11.3	12.68	9.92	10.08	66.79	7.94	13.73	9.45	12.72	13.21	15.06	13.17	32.58	4.01	26.08	14.98	14.5	4.61	12.71	12.38	56	6.76	5.81	9.71	9.26	7.51	7.3	22.2	47.29
MAPK1	5.78	1.06	6.62	16.23	3.89	0	8.34	5.3	0	0	7.26	0.81	4.51	2.77	11.24	16.34	1.08	1.84	2.34	0.8	4.99	0.8	5.24	6.53	6.61	4.53	0	0.56	2.34	4.6	6.35	7.69	0.85	3.8	1.42	1.71	11.67	4.56	11.52	8.98
MAPK14	6.9	6.7	26.29	34.45	7.61	3.16	25.27	28.47	4.7	6.26	5.82	5.29	7.16	2.43	39.94	42.83	0.35	4.52	1.24	4.32	2.54	6.63	35.03	39.22	1.86	2.99	4.79	6.47	8.04	13.47	19.9	29.22	4.71	4.88	5.8	10.18	11.02	12.7	22.21	24.67
RAC1	13.06	9.17	6.24	101.78	9.71	6.78	13.34	257.96	4.52	14.54	21.55	3.35	19.02	7.97	148.41	359.23	9.39	11.13	10.07	10.69	8.54	12.4	10.63	228.9	15.6	21.55	10.87	16.85	23.54	14.07	186.76	404.57	16.21	19.71	3.3	16.17	13.25	10.08	76.22	249.97
SRF	0	0.45	1.69	2.16	0.55	0.46	1.42	2.26	0	0	0	0	0.39	0	0.32	1.21	1.39	0	0.66	0.34	0.53	0.34	1.27	0	1.13	0.52	0.38	0.72	0	0.65	0.62	1.63	0.72	0	0.91	0.24	0	0.83	1.81	2.29
CDX2	0	0	0	5.17	0	0	1.61	3.84	0	0	1.75	0	0	0.89	5.78	10.82	0	0	0	0.78	0	0	3.61	3.6	1.28	0.49	1.93	0.66	0.56	0	5.66	3.09	0	0	0	0.55	0	3.77	3.29	6.93
