# Supplementary material for: Early transcriptional divergence underlies cell fate bias in bovine embryos
Source: Research Square preprint supplement (doi:10.21203/rs.3.rs-7028131/v1), 2025-07-14
Supplement: Supplementary file 6 [file 87be0ed07b83810ee122e483.xlsx]

## Sheet: Koyama et al_Source_Data_Fig.1
	1cell_E01_B1	1cell_E02_B1	1cell_E03_B1	1cell_E04_B1	1cell_E05_B1	1cell_E06_B1	1cell_E07_B1	1cell_E08_B1	1cell_E09_B1	1cell_E10_B1	2cell_E01_B1	2cell_E01_B2	2cell_E02_B1	2cell_E02_B2	2cell_E03_B1	2cell_E03_B2	2cell_E04_B1	2cell_E04_B2	2cell_E05_B1	2cell_E05_B2	2cell_E06_B1	2cell_E06_B2	2cell_E07_B1	2cell_E07_B2	2cell_E08_B1	2cell_E08_B2	2cell_E09_B1	2cell_E09_B2	2cell_E10_B1	2cell_E10_B2	4cell_E01_B1	4cell_E01_B2	4cell_E01_B3	4cell_E01_B4	4cell_E02_B1	4cell_E02_B2	4cell_E02_B3	4cell_E02_B4	4cell_E03_B1	4cell_E03_B2	4cell_E03_B3	4cell_E03_B4	4cell_E04_B1	4cell_E04_B2	4cell_E04_B3	4cell_E04_B4	4cell_E05_B1	4cell_E05_B2	4cell_E05_B3
20ALPHA-HSD	0	0	0	0	0	0	0	0	0	0	0	0	0	0	0	0	0	0	0	0	0	0	0	0	0	0	0	0	0	0	0	0	0	0	0	0	0	0	0	0	0	0	0	0	0	0	0	0	0
A1BG	0	0	0	0	0	1	0	0	0	1	0	5	0	1	2	3	0	1	0	2	0	0	3	1	0	1	3	4	0	2	0	0	0	0	0	1	1	0	0	0	1	1	0	1	0	0	0	0	0
A1CF	4	5	2	4	4	3	2	8	2	2	7	1	2	0	0	3	6	0	5	3	3	3	11	2	0	6	0	4	0	0	2	1	5	3	1	0	0	6	11	7	1	4	2	6	8	6	2	3	3
A2M	0	0	0	0	0	0	0	0	0	0	0	0	0	0	0	0	0	0	0	0	0	0	0	0	0	0	0	0	0	0	0	0	0	0	0	0	0	0	0	0	0	0	0	0	0	0	0	0	0
A2ML1	0	0	0	0	0	0	0	0	0	0	0	0	0	0	0	0	0	0	0	0	0	0	0	0	0	0	0	0	0	0	0	0	0	0	0	0	0	0	0	0	0	0	0	0	0	0	0	0	0
A3GALT2	0	0	0	0	0	0	0	0	0	2	0	0	0	1	0	0	0	0	0	0	1	0	0	0	1	2	0	2	0	0	0	0	0	0	0	0	0	0	0	0	0	0	0	0	0	0	0	0	0
A4GALT	0	0	0	0	0	0	0	0	0	0	0	0	0	0	0	0	1	0	0	0	0	0	0	0	0	0	0	0	0	0	0	0	0	0	0	0	0	0	0	0	0	0	0	0	0	0	0	0	0
A4GNT	0	0	0	0	0	0	0	0	0	0	0	0	0	0	6	0	0	1	1	3	0	1	0	5	0	1	0	0	1	0	0	0	0	0	0	0	0	4	0	0	0	0	1	0	0	0	0	0	0
AAAS	4	22	14	12	13	13	27	10	40	29	61	92	71	63	93	81	44	37	47	37	46	89	39	32	92	85	71	57	99	120	29	68	54	34	28	47	26	57	76	62	58	62	89	71	90	83	38	37	26
AACS	1	42	30	23	8	20	38	14	53	21	124	115	118	114	233	135	78	101	81	109	164	123	207	81	141	115	103	133	107	177	151	200	235	144	52	227	153	173	278	262	299	339	185	273	269	326	81	38	46
AADAC	0	0	0	0	0	0	0	0	0	0	0	0	0	0	0	0	0	0	0	0	0	0	0	0	0	0	0	0	0	0	0	0	0	0	0	0	0	0	0	0	0	0	0	0	0	0	0	0	0
AADACL3	0	0	0	0	0	0	5	0	0	0	0	0	0	0	0	2	0	0	0	1	0	0	0	0	0	1	0	0	0	0	0	0	0	0	0	0	0	0	0	0	0	0	0	0	0	0	0	0	0
AADACL4	0	0	0	0	0	0	0	0	0	0	0	0	0	0	0	0	0	0	0	0	0	0	0	0	0	0	0	0	0	0	0	0	0	0	0	0	0	0	0	0	0	0	0	0	0	0	0	0	0
AADAT	19	50	65	72	54	63	107	53	105	116	148	188	163	136	172	141	160	154	187	166	135	154	131	111	186	145	224	151	117	116	116	170	223	157	163	186	181	209	249	273	245	308	256	168	163	232	403	180	173
AAED1	5	12	4	9	5	18	6	8	8	6	19	13	18	18	42	28	10	7	10	21	21	16	9	8	9	10	19	15	34	28	5	12	6	2	3	5	8	11	3	23	17	6	2	6	17	3	2	1	2
AAGAB	31	59	32	63	60	39	43	60	41	51	39	51	73	55	64	68	40	67	94	71	38	33	41	46	95	66	52	63	57	70	28	34	49	34	45	44	32	62	87	68	64	71	74	35	34	37	53	60	32
AAK1	4	15	5	8	2	10	21	15	18	10	22	29	17	22	35	22	16	24	9	17	11	11	27	15	20	17	33	18	16	21	18	35	25	23	22	20	19	33	24	31	30	30	33	45	45	16	12	7	7
AAMDC	1	0	1	1	0	1	0	1	1	0	0	1	0	0	2	3	0	0	0	4	1	1	0	0	0	0	0	2	0	0	1	0	2	0	0	0	0	0	1	2	0	0	0	0	0	0	1	0	0
AAMP	2	31	11	2	4	5	32	9	21	7	44	54	52	52	60	34	40	38	54	39	49	32	61	28	78	54	36	34	57	77	41	77	60	48	30	43	71	45	111	75	108	84	57	65	81	59	52	30	41
AANAT	0	0	0	0	0	0	0	0	0	0	0	0	0	0	0	0	0	0	0	0	0	0	0	0	0	0	0	0	0	0	0	0	0	0	0	0	0	0	0	0	0	0	0	0	0	0	0	0	0
AAR2	0	1	3	1	0	4	2	1	1	2	11	5	4	13	9	7	7	5	11	9	1	7	5	3	8	16	9	13	2	5	3	12	12	7	8	12	16	21	34	31	14	18	11	9	12	21	21	14	14
AARD	5	9	12	21	21	17	46	12	48	22	39	34	54	45	57	56	58	42	50	40	27	17	44	24	70	69	88	62	49	42	6	13	20	19	14	29	45	90	10	20	36	17	42	52	47	79	17	7	15
AARS	0	14	1	2	0	0	3	8	6	0	6	6	4	20	14	6	14	13	13	22	6	8	3	14	25	15	7	7	8	17	8	13	26	25	9	26	8	27	52	39	21	77	8	5	12	16	31	13	8
AARS2	0	0	0	0	0	0	0	1	2	0	3	1	1	0	3	0	0	0	1	1	0	0	0	1	1	1	0	1	0	3	2	0	0	0	0	5	0	0	0	0	2	4	0	0	4	0	1	0	0
AARSD1	34	95	98	113	88	143	114	74	132	151	134	191	153	150	225	226	189	229	230	208	160	172	130	137	254	199	229	197	296	262	76	135	175	133	104	130	167	210	306	282	260	309	186	160	113	209	230	151	137
AASDH	129	165	122	113	54	85	196	92	172	220	203	251	267	243	215	277	224	235	301	257	223	302	258	144	199	230	224	277	292	259	110	221	227	110	190	176	190	222	316	351	294	302	310	344	281	394	274	229	149
AASDHPPT	8	29	16	22	6	19	39	20	30	33	40	51	40	33	45	34	53	66	60	46	30	52	20	32	73	48	75	73	43	41	39	69	89	61	54	47	56	56	76	113	74	102	51	63	26	51	51	23	19
AASS	0	0	0	0	0	0	0	0	0	0	0	0	0	0	0	0	0	0	0	0	0	0	0	0	0	0	0	0	0	0	0	0	0	0	0	0	0	0	0	0	0	0	0	0	0	0	0	0	0
AATF	2	33	8	20	4	20	21	18	31	27	39	68	56	66	69	84	84	76	67	61	61	48	47	45	74	58	56	44	58	48	32	61	73	57	42	50	60	64	100	133	112	125	103	51	48	71	72	56	48
AATK	0	1	0	2	0	1	1	0	2	0	0	4	1	7	1	2	4	2	3	2	0	1	1	3	4	1	2	0	0	5	1	5	3	1	6	7	6	4	6	1	3	4	4	6	2	8	2	2	0
ABAT	0	17	22	43	12	25	12	14	25	10	28	23	12	15	16	15	12	18	24	23	14	11	8	12	20	17	25	25	15	18	32	38	21	19	70	70	61	40	52	43	37	47	26	29	39	23	61	22	26
ABCA1	1	21	7	6	19	9	10	13	16	16	6	0	10	7	52	29	28	30	15	6	21	26	18	8	4	3	11	16	5	2	29	35	40	28	25	38	44	31	75	73	68	79	26	36	38	42	29	22	15
ABCA10	0	1	0	0	0	0	1	0	1	0	0	2	0	0	0	2	0	0	0	1	0	0	0	0	0	0	0	0	0	1	0	3	0	0	0	0	0	0	0	0	0	0	0	3	0	2	2	0	0
ABCA12	4	22	11	7	2	1	1	0	9	25	3	20	15	10	10	14	6	9	15	25	0	1	15	11	15	20	4	3	15	8	10	8	9	3	8	13	3	8	9	7	10	8	12	3	4	12	6	2	5
ABCA13	4	2	4	3	7	8	6	1	1	5	8	0	5	2	9	0	7	8	6	6	3	2	10	2	6	4	0	9	3	1	1	3	8	1	11	11	8	12	15	5	5	15	8	5	5	6	3	0	6
ABCA2	0	0	1	1	0	0	2	0	4	0	1	0	2	2	6	5	0	2	0	2	0	0	0	3	0	2	0	0	0	4	0	0	1	7	0	0	0	0	3	3	0	5	0	5	1	4	3	0	0
ABCA3	0	0	0	0	0	0	2	0	1	1	2	2	5	0	7	4	10	2	4	4	4	8	4	1	2	7	2	3	4	0	7	11	11	8	3	4	8	2	5	20	18	16	1	4	5	3	1	0	1
ABCA4	7	18	12	14	13	14	25	24	21	9	15	12	21	14	12	21	14	21	20	10	8	9	6	14	11	9	16	8	15	14	5	10	9	11	9	10	5	12	11	19	17	12	12	5	17	21	12	7	4
ABCA5	10	40	32	12	19	23	50	27	56	31	54	52	48	44	42	42	37	62	68	38	29	26	42	36	76	54	58	37	50	50	29	57	71	64	39	19	22	27	56	87	91	78	48	37	39	56	38	20	18
ABCA6	0	0	0	0	0	0	1	0	0	0	0	0	0	0	0	0	0	0	0	0	0	0	0	0	0	0	0	0	0	0	0	0	2	0	0	0	0	0	0	1	0	0	0	0	0	1	0	0	0
ABCA7	0	0	0	2	1	0	0	0	0	0	5	0	0	0	0	0	1	2	0	0	0	0	1	0	0	0	5	0	0	0	1	2	0	0	0	1	0	0	0	4	0	4	1	0	0	1	0	0	1
ABCA9	0	0	0	0	3	1	0	0	0	0	0	0	3	0	0	0	0	0	1	0	0	0	0	0	1	0	0	0	0	2	0	0	0	0	0	0	0	0	0	0	0	0	2	0	0	0	0	0	0
ABCB1	37	382	113	103	91	101	238	88	160	224	291	329	278	199	313	316	370	365	421	367	247	278	251	243	306	317	279	184	268	246	200	346	346	232	204	265	264	237	481	403	404	491	368	248	265	288	274	141	148
ABCB10	198	219	219	274	199	210	378	286	417	254	334	337	358	360	253	167	253	286	274	254	182	208	308	202	308	271	339	238	362	347	117	147	179	151	157	144	164	215	207	182	203	184	406	291	181	309	302	232	201
ABCB11	14	23	11	35	6	17	33	30	28	32	24	30	30	40	10	26	27	32	43	44	4	10	8	18	22	33	44	33	16	18	10	14	11	16	7	16	9	17	25	22	23	7	20	21	7	11	86	32	36
ABCB4	0	1	0	0	0	0	0	0	0	0	0	0	0	0	0	1	0	0	0	2	0	0	0	0	0	1	0	0	0	0	0	0	3	0	1	0	0	0	0	0	0	0	0	0	0	0	0	0	0
ABCB5	0	0	0	0	0	0	0	0	0	0	0	0	0	0	0	0	0	0	0	0	0	0	0	0	0	0	0	0	0	0	0	0	0	0	0	0	0	0	0	0	0	0	0	0	0	0	0	0	0
ABCB6	0	0	0	0	0	0	0	0	0	0	0	0	2	3	0	2	1	3	1	4	2	1	1	0	0	0	1	1	0	0	0	0	0	2	0	0	1	0	0	2	3	0	0	0	0	0	0	0	0
ABCB7	21	61	48	36	22	46	75	24	68	84	61	44	101	104	77	87	90	109	109	119	114	102	92	67	65	78	90	73	80	99	19	60	69	45	54	39	34	27	71	71	87	70	115	82	78	73	114	50	39
ABCB8	0	2	1	1	0	0	1	0	2	0	8	1	3	6	9	14	5	0	10	8	10	10	8	4	10	6	3	4	6	8	5	8	5	5	10	7	9	3	11	10	6	8	8	21	1	13	5	8	7
ABCB9	0	1	1	0	0	2	0	0	0	1	0	0	2	0	0	1	0	1	1	0	1	1	2	1	0	4	2	0	1	1	0	1	0	0	3	5	1	1	2	0	0	0	3	1	0	0	0	5	1
ABCC1	0	12	8	5	2	4	12	7	15	5	11	13	15	13	42	12	17	26	19	24	12	9	10	7	15	20	22	8	5	7	13	24	24	12	10	17	13	19	35	47	43	39	13	8	23	23	18	12	9
ABCC10	0	2	0	0	0	0	0	0	0	0	1	1	0	0	7	2	0	0	4	0	2	0	1	0	0	0	3	0	1	1	0	0	3	2	4	0	2	0	2	4	0	6	0	8	1	6	2	3	0
ABCC11	5	5	3	1	2	2	3	0	5	4	2	3	0	6	7	8	1	4	10	3	4	10	7	3	0	2	3	3	7	4	1	6	3	7	1	1	1	3	3	4	10	3	8	2	0	5	5	7	4
ABCC12	0	0	0	0	0	0	0	0	0	0	0	0	0	0	0	0	0	0	0	0	0	0	0	0	0	0	0	0	0	0	0	0	0	0	0	0	0	0	0	0	0	0	0	0	0	0	0	0	0
ABCC2	13	87	36	32	29	42	99	60	86	77	76	94	144	74	67	91	103	112	103	115	65	87	78	82	82	102	132	128	132	85	56	80	95	84	66	104	35	92	259	246	201	162	87	88	59	104	122	84	89
ABCC3	2	5	3	5	0	9	3	5	3	2	1	5	3	1	1	4	2	0	4	0	0	0	1	1	2	0	0	1	13	10	0	0	6	7	0	0	1	0	1	9	1	2	9	10	5	10	7	5	3
ABCC5	1	5	9	5	0	6	10	2	5	9	10	9	8	2	11	7	15	10	13	14	7	7	1	3	15	11	16	11	9	8	6	14	11	5	4	5	3	2	12	12	25	19	2	3	0	12	35	6	16
ABCC6	0	0	0	0	0	0	0	0	0	0	0	0	0	0	0	0	0	0	0	0	0	0	0	0	0	0	0	0	0	0	0	0	0	0	0	0	0	0	0	0	0	0	0	0	0	0	0	0	0
ABCC8	0	0	3	0	0	1	4	7	2	1	1	3	12	2	3	0	4	1	2	0	0	1	0	1	3	1	3	2	7	7	0	0	0	0	0	0	0	0	2	0	2	1	2	0	0	0	6	0	0
ABCC9	0	0	0	0	0	0	0	0	0	0	0	0	0	0	0	0	0	1	0	0	0	0	0	0	0	0	0	0	0	0	0	0	0	0	0	0	0	0	0	0	0	0	0	0	0	0	0	0	0
ABCD1	0	0	0	0	0	0	0	0	0	1	0	0	0	0	0	0	0	0	0	1	0	0	0	1	2	0	0	0	0	0	0	0	0	1	0	0	0	0	0	0	0	0	0	0	0	0	0	0	0
ABCD2	0	1	0	2	1	4	8	1	0	6	2	6	6	3	6	6	9	6	10	5	3	2	2	1	6	5	16	3	3	1	3	9	18	3	10	6	3	10	3	4	4	13	0	0	6	6	4	6	2
ABCD3	13	134	85	78	44	71	122	84	107	122	123	107	141	123	119	149	133	181	116	142	110	93	133	107	139	125	256	202	174	136	70	155	124	108	129	111	145	146	203	183	197	228	199	158	172	194	166	101	52
ABCD4	0	5	0	4	0	3	4	2	2	3	13	4	3	11	14	4	2	5	3	10	11	13	11	5	4	7	6	4	5	9	5	16	10	3	1	5	9	4	15	27	12	10	14	15	6	13	6	7	18
ABCE1	123	307	122	160	155	143	276	206	258	243	223	284	368	251	245	257	247	320	277	261	166	217	196	205	318	301	441	316	494	363	83	211	216	170	152	139	116	164	273	286	299	275	333	221	227	296	278	152	176
ABCF1	18	61	19	37	15	31	24	14	30	28	159	152	209	165	199	155	111	183	203	157	118	85	139	96	169	175	178	177	145	138	70	110	167	108	93	101	130	166	300	320	281	320	260	175	105	198	168	118	118
ABCF2	39	227	205	88	56	51	357	79	266	294	576	726	753	659	647	641	535	518	669	651	476	499	653	370	728	669	746	729	715	893	467	767	843	682	413	562	571	598	1501	1489	1492	1442	800	834	646	880	1098	732	574
ABCF3	6	29	16	7	4	7	31	8	39	30	62	100	89	85	124	81	85	84	116	102	94	103	118	59	126	73	79	69	56	42	102	188	163	151	107	174	180	175	336	355	323	288	178	202	140	239	191	72	89
ABCG1	0	0	0	0	0	0	0	0	0	0	0	0	0	0	0	0	0	0	0	0	0	0	0	0	0	0	0	0	0	0	0	0	0	0	0	0	0	0	0	0	0	0	0	0	0	0	0	0	0
ABCG2	16	117	26	44	37	37	40	32	80	116	37	43	81	76	67	90	37	53	58	66	39	41	53	28	104	107	95	74	77	67	44	73	76	52	60	44	56	51	114	147	156	107	102	115	36	76	59	49	40
ABCG4	0	1	1	0	0	2	1	0	0	0	0	0	0	5	4	1	0	0	2	0	0	4	0	1	1	1	4	1	2	5	1	0	7	0	2	1	3	2	11	4	2	0	2	3	0	0	4	1	1
ABCG5	3	18	13	7	3	2	19	7	17	12	52	51	37	26	19	18	13	20	12	25	16	15	14	17	33	25	26	19	21	41	40	75	73	46	80	63	60	64	95	119	101	79	57	75	62	66	36	46	30
ABCG8	2	25	19	15	4	3	25	12	21	22	35	60	58	65	95	86	51	55	87	66	78	59	83	33	51	44	70	31	33	28	77	72	121	76	65	98	72	102	89	110	113	128	83	92	104	103	102	52	22
ABHD1	0	0	2	2	0	0	0	0	0	0	2	0	1	0	0	0	0	1	0	1	0	0	0	1	2	1	0	0	0	0	0	1	0	1	0	0	0	0	0	0	0	0	5	0	0	0	0	0	0
ABHD10	330	356	246	302	284	310	459	424	428	335	476	545	464	438	404	354	292	344	397	372	347	338	389	268	539	513	535	510	645	695	106	301	278	229	241	291	285	450	387	376	361	367	743	616	496	742	363	267	209
ABHD11	16	72	49	47	17	45	78	34	61	72	106	139	130	92	158	139	106	109	138	176	76	77	84	67	143	117	115	112	131	153	79	79	107	63	47	57	60	93	133	147	134	129	120	101	41	79	111	59	54
ABHD12	0	5	0	1	2	4	14	7	6	2	22	18	36	16	45	43	13	14	37	37	9	10	18	25	34	43	21	37	26	41	9	33	59	60	4	7	23	63	5	34	63	74	5	4	28	90	6	1	4
ABHD12B	2	1	0	4	0	1	3	1	1	0	1	0	0	6	0	0	0	0	1	0	0	1	4	1	1	2	0	1	2	3	2	0	1	0	0	0	2	0	0	0	3	4	0	0	0	0	8	0	1
ABHD13	0	0	1	0	1	0	1	2	0	0	0	0	0	1	0	0	0	1	0	0	0	0	0	0	0	0	0	0	0	0	0	0	0	0	0	0	0	4	0	0	4	0	0	0	0	0	0	0	0
ABHD14A	0	1	0	2	0	0	1	0	0	0	3	0	0	0	0	1	1	1	4	1	3	0	0	3	0	0	0	1	3	2	0	0	0	0	0	2	0	0	0	0	0	0	5	0	2	0	0	0	0
ABHD14B	0	0	0	0	1	0	0	0	0	0	1	0	5	4	2	2	0	0	1	0	0	0	1	0	0	3	2	0	0	3	0	9	0	2	1	6	3	4	1	0	4	6	1	4	5	0	2	0	1
ABHD15	0	0	0	0	1	0	0	0	0	0	0	1	0	0	0	1	0	1	1	0	0	0	0	0	0	0	0	0	0	0	0	0	1	1	0	0	0	0	1	0	0	0	0	0	0	0	0	0	0
ABHD16A	12	15	6	6	1	15	12	6	5	4	46	52	37	30	65	45	24	17	39	30	41	53	42	15	51	27	30	37	44	55	30	54	48	37	17	25	19	19	73	62	60	74	45	89	56	68	43	43	31
ABHD16B	0	0	0	1	0	0	1	0	0	1	0	0	0	0	1	1	0	0	0	3	0	0	2	0	1	0	0	0	1	0	0	2	1	1	0	0	0	1	0	1	0	1	0	0	1	0	0	0	0
ABHD17A	0	5	3	2	1	2	6	4	6	7	18	27	8	13	34	31	14	16	31	28	10	3	11	17	22	25	30	28	7	17	7	38	50	34	4	1	13	25	6	13	21	38	4	8	5	31	0	0	1
ABHD17B	56	53	52	68	63	60	67	73	95	86	96	67	95	93	139	84	78	97	94	75	99	94	113	60	104	88	151	98	85	73	67	212	156	131	20	42	146	115	31	95	162	194	60	33	107	151	43	23	27
ABHD17C	56	42	32	38	36	43	56	61	37	26	51	27	21	31	45	28	21	15	20	47	15	19	27	11	22	30	53	41	63	40	13	11	69	28	22	9	20	66	11	8	23	31	19	12	7	40	29	14	8
ABHD18	252	255	181	232	210	215	409	273	267	329	460	460	487	545	331	321	371	420	426	338	490	466	448	269	414	374	541	457	537	432	350	643	618	428	498	505	488	477	695	621	679	658	514	658	434	614	531	337	372
ABHD2	0	7	5	4	1	6	6	3	3	4	7	7	11	5	10	5	10	5	9	13	2	7	6	5	2	5	5	14	5	9	2	6	9	11	3	10	3	5	5	5	4	6	1	2	3	0	10	1	3
ABHD3	65	76	64	42	47	54	138	64	128	106	150	167	220	199	155	124	94	71	136	151	151	167	144	100	218	172	208	137	214	197	64	129	150	111	70	103	101	102	137	113	116	107	181	209	222	269	150	205	146
ABHD4	6	50	27	7	5	6	37	17	50	32	120	148	123	143	192	178	118	104	135	148	167	180	204	98	174	139	124	136	185	243	140	199	183	149	151	190	167	166	242	275	274	297	231	317	256	335	165	48	68
ABHD5	2	10	6	2	9	8	10	14	5	19	6	12	6	12	16	19	17	7	17	11	11	4	15	4	15	24	15	7	23	13	21	11	22	11	25	27	22	31	23	20	28	24	16	12	12	11	26	26	19
ABHD6	5	27	15	14	10	6	21	21	35	30	36	58	60	41	61	48	33	64	76	50	26	37	31	43	74	55	43	32	27	31	38	85	81	62	30	36	30	58	119	156	154	118	49	45	33	54	56	35	34
ABHD8	0	2	0	1	0	0	3	0	2	0	6	7	2	3	15	3	5	3	1	1	3	5	6	1	10	10	4	4	6	1	12	9	11	8	8	10	12	7	16	15	10	13	11	15	9	11	16	3	5
ABI1	179	296	181	209	272	216	322	229	288	275	305	428	500	507	496	485	438	461	454	421	411	455	492	332	482	495	723	543	469	510	681	1226	1270	880	1007	1026	1034	1118	1536	1556	1413	1523	842	942	856	1136	884	495	421
ABI2	18	48	23	35	13	18	59	37	46	50	72	118	126	132	110	101	102	68	105	72	81	68	113	56	155	132	119	103	115	147	102	140	184	117	46	88	106	141	79	247	169	186	65	178	160	215	48	26	38
ABI3	0	0	0	0	0	0	0	0	0	0	0	0	0	0	0	0	0	0	0	0	0	0	0	0	0	0	0	0	0	0	0	0	0	0	0	0	0	0	0	0	0	0	0	0	0	0	0	0	1
ABI3BP	145	169	84	162	121	170	145	105	179	139	118	141	164	120	110	127	167	174	161	126	82	79	131	111	212	162	204	163	170	133	122	211	200	120	176	107	103	116	167	240	203	183	227	139	136	186	255	108	101
ABL1	15	35	30	20	9	8	44	15	71	39	90	111	94	51	138	73	59	94	75	72	53	58	56	55	113	109	87	60	116	94	26	47	66	37	29	36	21	54	73	65	68	97	78	50	46	66	52	34	26
ABL2	4	20	10	5	6	13	3	18	9	6	9	9	14	8	25	11	6	12	19	16	12	19	4	6	6	22	6	11	8	13	9	2	10	6	14	11	9	25	25	15	49	21	18	8	4	2	16	13	3
ABLIM1	24	98	84	27	23	22	121	38	131	116	171	199	159	108	270	220	213	236	240	266	178	135	166	157	155	134	202	180	202	169	77	160	121	82	162	144	215	153	308	260	218	237	293	221	277	286	231	124	103
ABLIM2	0	0	0	0	0	0	0	0	0	0	0	0	0	0	1	0	0	0	0	0	1	0	0	0	0	0	0	0	0	0	0	0	0	0	0	0	0	0	0	0	0	3	0	0	0	0	0	0	0
ABLIM3	3	59	16	16	3	3	54	11	53	33	92	131	72	91	88	95	79	102	95	94	90	147	91	61	85	84	140	114	91	90	33	77	90	52	50	80	48	91	97	80	110	82	101	117	99	69	87	58	51
ABO	0	0	0	0	0	0	0	0	0	0	0	0	0	0	0	0	0	0	0	0	0	0	0	0	0	0	0	0	0	0	0	0	0	0	0	0	0	0	0	0	0	0	0	0	0	0	0	0	0
ABR	5	28	16	11	5	8	41	17	26	28	51	39	41	60	52	38	23	48	46	47	24	36	51	38	62	31	66	35	34	32	29	86	89	49	43	66	58	60	79	100	98	109	60	45	36	72	38	31	47
ABRA	0	0	0	3	0	0	2	0	0	0	0	0	0	0	0	2	0	0	0	0	0	0	0	1	1	0	2	1	1	0	0	0	0	0	4	0	3	0	0	6	2	4	0	9	1	0	0	1	0
ABRACL	79	34	29	115	69	92	40	53	59	85	29	18	66	44	55	53	38	57	70	58	31	31	17	24	70	88	70	56	32	25	28	41	53	45	56	59	56	55	72	80	82	65	53	30	10	45	43	29	35
ABRAXAS1	157	365	218	228	189	186	371	241	348	323	337	400	407	366	438	390	445	568	513	398	341	309	351	336	441	449	412	319	374	339	163	265	355	271	222	227	245	409	391	442	439	459	592	333	248	417	454	270	262
ABRAXAS2	54	128	72	108	52	111	135	79	155	130	258	279	294	261	222	237	224	245	312	278	176	240	227	189	315	280	298	276	207	218	207	360	435	275	277	423	316	387	453	525	528	516	386	346	277	370	467	221	247
ABT1	3	22	8	17	6	11	16	12	15	32	33	33	48	41	38	46	65	62	48	46	51	68	29	50	36	41	33	48	13	16	86	104	145	95	117	131	120	121	251	242	166	232	80	83	95	128	106	61	42
ABTB1	0	0	0	1	0	0	1	0	0	0	0	0	0	0	2	2	0	0	0	1	2	0	0	1	1	0	0	3	0	0	0	0	1	2	0	1	0	1	4	0	0	0	0	1	0	0	0	3	0
ABTB2	0	3	0	11	2	3	3	5	4	0	15	8	7	14	14	7	11	6	11	10	4	5	7	4	10	8	14	2	2	12	4	19	15	9	6	4	15	18	15	25	8	11	8	18	14	21	16	7	7
ACAA1	0	6	2	2	0	3	26	3	2	11	17	16	25	28	48	39	40	60	30	44	35	19	38	38	25	22	27	18	15	16	39	59	68	47	25	38	38	40	98	108	82	107	27	51	27	45	2	1	2
ACAA2	9	53	26	74	33	94	45	44	48	71	31	69	99	94	74	90	57	92	133	99	24	41	56	68	65	111	65	79	50	62	32	120	88	48	67	45	45	67	142	178	171	106	90	75	40	76	110	67	98
ACACA	7	32	23	17	5	26	26	23	19	46	43	45	85	65	36	55	67	38	65	68	25	46	36	35	61	41	66	48	77	45	38	60	75	43	30	55	67	52	68	106	86	129	73	39	61	84	65	66	31
ACACB	0	3	4	0	0	1	0	1	2	5	2	10	4	8	3	11	4	8	8	3	12	17	6	2	6	6	3	3	9	12	7	11	9	7	11	14	13	15	30	22	10	25	7	15	16	9	6	8	6
ACAD10	0	0	1	0	0	0	3	0	0	0	6	2	3	0	0	3	0	6	0	1	4	3	3	1	1	0	2	1	1	0	3	15	6	0	3	2	5	2	15	1	3	3	6	0	14	0	4	1	2
ACAD11	16	36	40	29	22	12	61	28	84	56	56	50	127	80	38	57	93	84	98	63	67	98	67	60	136	109	93	85	95	90	63	79	100	82	38	69	61	59	119	111	99	135	77	47	55	84	126	66	79
ACAD8	3	1	2	3	2	11	1	1	3	2	0	11	5	5	11	8	2	1	3	6	10	5	2	0	1	3	11	4	7	6	0	1	4	4	0	0	0	2	0	4	1	4	0	5	6	7	1	2	0
ACAD9	0	5	4	1	1	0	7	0	5	2	17	17	6	11	24	7	20	10	15	19	7	10	19	3	18	9	23	36	13	8	21	37	47	23	12	14	21	15	66	78	29	56	25	19	25	22	17	19	15
ACADL	0	0	2	0	0	1	0	0	0	0	7	5	1	3	8	4	1	6	5	3	0	1	7	4	1	1	5	2	5	1	0	3	4	0	1	3	0	3	4	1	0	1	2	5	0	5	0	2	2
ACADM	34	59	25	65	15	45	58	23	63	51	24	31	122	75	81	100	97	102	79	63	54	81	73	75	87	84	64	63	79	50	37	43	60	75	38	32	27	39	69	66	48	52	56	86	48	93	91	39	57
ACADS	0	6	0	8	2	0	4	5	4	2	11	13	11	16	27	23	7	10	16	10	11	12	13	5	9	11	8	12	11	8	2	12	12	9	11	17	14	10	9	22	14	25	3	7	6	9	14	5	17
ACADSB	16	111	46	73	55	63	122	76	111	111	99	115	178	106	126	132	157	179	137	186	81	95	103	79	124	94	165	133	121	165	80	128	138	140	121	113	128	152	204	213	169	207	211	142	105	148	196	105	65
ACADVL	0	6	6	3	1	3	10	1	8	10	14	6	37	34	13	27	21	25	21	34	23	13	42	9	27	20	36	26	21	31	28	47	54	30	35	41	24	38	85	68	64	58	33	55	71	54	38	27	16
ACAN	0	0	0	0	0	0	0	0	0	0	0	0	0	0	0	0	0	0	0	1	0	0	0	1	0	0	0	0	0	0	0	0	0	0	0	0	0	1	0	0	0	4	0	1	0	2	0	1	0
ACAP1	0	5	7	3	4	5	2	5	1	6	0	0	4	5	1	4	4	4	6	4	5	4	0	3	4	4	4	0	0	3	6	0	7	4	1	7	4	4	9	4	8	7	7	6	3	2	12	4	2
ACAP2	29	51	33	37	11	18	86	37	64	32	146	172	135	100	137	124	128	154	147	106	130	142	106	87	132	135	133	85	122	127	45	82	70	72	47	38	26	59	88	123	104	116	162	88	89	111	122	73	68
ACAP3	0	0	2	0	0	0	0	0	3	1	2	4	3	11	6	4	3	2	4	2	9	7	10	2	2	3	1	7	3	2	1	3	6	1	3	4	2	2	5	2	2	8	6	4	13	9	6	2	1
ACAT1	17	40	14	26	40	40	50	28	39	44	24	29	40	21	48	41	28	60	54	52	15	21	45	23	50	76	70	46	55	52	10	40	35	27	17	36	31	41	43	51	29	63	15	50	24	65	47	16	30
ACAT2	113	347	156	187	268	227	238	308	160	200	244	223	410	448	312	312	274	308	357	297	196	193	320	233	450	408	353	321	444	485	277	400	456	328	361	489	427	544	719	873	842	792	547	379	282	543	471	272	265
ACBD3	42	93	73	93	77	66	102	88	126	155	112	74	142	104	155	116	158	186	206	163	66	78	82	124	251	168	215	147	154	174	62	227	263	177	95	52	76	164	119	147	177	272	138	56	47	209	168	93	86
ACBD4	0	6	3	1	4	2	7	6	4	4	16	9	19	14	21	24	10	11	20	20	14	7	9	7	21	31	15	8	14	17	3	28	21	14	5	10	13	16	39	24	18	35	5	30	11	15	18	14	13
ACBD5	32	58	33	22	24	42	36	52	40	31	89	93	49	36	31	44	61	52	66	59	46	37	39	38	65	55	55	42	53	59	26	39	26	40	11	36	15	29	58	65	70	57	130	145	83	90	94	60	57
ACBD6	1	2	0	0	0	1	1	1	1	1	0	0	0	0	1	0	1	2	2	1	0	0	0	0	0	1	3	0	1	1	0	1	0	0	1	0	0	1	0	1	0	1	0	1	0	0	2	0	0
ACBD7	1	7	10	12	7	6	9	6	5	4	8	6	10	3	9	12	22	11	12	11	4	5	5	8	10	18	15	8	8	8	3	0	2	2	7	3	1	25	6	6	8	4	5	5	0	17	15	7	4
ACCS	0	2	2	2	0	3	1	2	4	1	7	6	1	0	4	1	3	2	9	5	0	3	9	0	2	1	1	2	2	1	0	1	3	1	2	4	0	2	9	3	5	1	4	0	0	1	3	2	1
ACCSL	1952	4935	4522	2252	1777	2180	9114	4394	6242	4785	13432	15861	15716	16351	14791	11403	8477	8036	11431	11467	17555	17147	16408	8676	16579	12951	16832	14885	15400	18038	5319	9183	9780	7142	10952	12178	11448	12809	10646	11115	11172	11106	21164	23744	21360	25703	18368	12035	10145
ACD	6	46	24	9	3	2	56	11	39	34	143	196	221	194	202	169	122	120	139	107	102	126	96	62	189	173	131	156	141	203	68	118	134	80	75	96	107	99	195	179	173	213	139	124	99	151	165	92	99
ACE	0	1	0	0	0	0	0	0	0	0	1	1	0	0	0	1	0	0	0	0	0	0	0	0	0	0	0	0	0	1	0	0	0	1	0	4	2	1	5	1	0	0	0	0	0	0	1	0	0
ACE2	0	0	0	0	0	0	0	4	0	0	0	0	1	1	0	1	0	0	0	0	0	1	0	0	0	0	3	0	0	0	0	0	0	0	3	0	0	0	0	0	1	0	0	0	0	1	0	0	0
ACE3	0	0	0	0	0	2	0	0	0	0	3	0	0	2	0	1	0	1	0	1	0	0	0	0	1	0	0	1	2	0	0	0	0	0	0	0	0	1	0	0	2	0	1	0	0	0	2	4	0
ACER1	0	0	0	0	2	0	0	0	0	0	0	0	0	2	0	0	0	0	0	0	0	0	0	0	0	0	0	0	0	0	0	0	0	0	0	0	0	0	0	0	0	0	0	0	0	0	0	0	0
ACER2	0	1	0	0	0	0	0	0	3	0	2	0	0	0	0	0	1	0	1	5	1	0	1	1	0	0	0	1	0	3	0	0	3	1	0	0	0	0	1	0	8	0	0	0	0	0	5	0	1
ACER3	10	27	14	15	14	17	45	15	49	40	66	80	85	80	49	68	51	52	76	41	32	32	48	35	87	88	72	38	74	88	40	65	76	49	70	48	49	94	58	101	113	72	63	64	27	71	52	38	33
ACHE	0	0	0	0	0	0	0	0	0	0	0	0	0	0	0	0	0	0	0	0	0	0	0	0	0	0	0	0	0	0	0	0	0	0	0	0	0	0	0	0	0	0	0	0	0	0	0	0	0
ACIN1	34	41	16	22	23	15	57	32	43	37	86	71	97	46	92	52	59	70	78	97	58	65	45	48	62	73	86	65	74	78	23	36	48	44	34	36	45	50	46	66	81	87	94	46	36	70	90	49	30
ACKR1	0	0	0	0	0	0	0	0	0	0	0	0	0	0	0	0	0	0	0	0	0	0	0	0	0	0	0	0	2	0	0	0	0	0	0	0	0	0	0	0	0	0	0	0	0	0	0	0	0
ACKR2	0	1	0	1	3	1	0	0	0	1	0	0	3	3	0	2	5	5	0	1	0	0	3	1	0	1	0	2	0	1	1	7	1	4	0	0	0	1	2	13	1	3	0	3	1	0	6	4	5
ACKR3	0	0	0	0	0	0	0	0	0	0	0	0	0	0	0	0	0	0	0	0	0	3	0	0	0	0	0	0	0	0	0	0	0	0	0	0	0	0	0	0	0	0	1	0	0	0	0	0	0
ACKR4	0	0	0	0	0	0	0	0	0	0	0	0	0	0	0	0	0	0	1	0	0	0	0	0	0	0	0	0	0	0	0	0	0	0	0	0	0	0	0	0	0	0	0	0	0	0	0	0	0
ACLY	31	94	71	67	70	57	92	54	102	107	154	144	197	225	272	194	175	166	222	201	207	200	247	89	207	165	222	157	168	121	328	669	464	414	239	630	528	338	752	796	676	725	210	461	459	359	317	223	192
ACMSD	0	0	0	0	0	0	0	0	0	0	0	0	0	0	0	0	0	0	0	0	0	0	0	0	0	0	0	0	0	0	0	0	0	0	0	0	0	0	0	0	0	0	0	0	0	0	0	0	0
ACO1	1	24	17	16	2	8	13	16	3	19	22	30	40	38	68	71	31	45	37	60	22	34	22	21	23	26	48	48	37	38	25	43	64	42	45	49	36	67	78	114	84	93	64	66	57	124	58	31	25
ACO2	1	12	10	3	1	6	19	3	9	3	24	24	45	61	68	43	40	47	60	46	48	53	78	38	38	43	38	39	11	56	42	68	109	68	49	63	71	65	142	104	95	101	70	81	38	66	77	38	41
ACOD1	0	0	0	0	0	0	0	0	0	0	0	0	0	0	0	0	0	0	0	0	0	0	0	0	0	0	0	0	0	0	0	0	0	0	0	0	0	0	0	0	0	0	0	0	0	0	0	0	0
ACOT11	0	0	0	0	0	0	0	0	0	0	1	1	0	0	0	0	0	1	0	1	1	0	0	0	0	0	0	0	0	0	0	1	0	0	0	0	0	1	1	0	0	0	2	3	0	0	0	0	0
ACOT12	1	0	0	0	0	0	0	0	0	0	0	0	0	0	0	1	0	0	0	0	0	0	0	0	0	0	1	1	0	0	0	0	0	0	0	0	0	0	0	0	0	0	0	0	1	0	0	0	1
ACOT13	6	17	9	28	8	31	7	13	15	18	8	10	19	13	20	22	12	4	14	10	13	8	17	7	7	19	17	25	22	20	8	20	9	15	25	20	12	12	11	44	19	19	24	34	14	35	33	8	6
ACOT2	5	31	12	17	14	6	24	17	34	23	68	69	89	54	72	61	74	57	57	50	50	59	76	30	93	93	106	78	84	105	23	20	47	45	25	28	36	64	46	43	53	60	68	59	39	54	7	25	30
ACOT4	0	0	0	0	0	0	0	0	0	0	0	2	0	0	0	0	0	0	0	1	0	0	1	1	0	0	2	0	0	0	0	2	0	0	0	0	0	0	0	0	0	0	0	0	0	1	0	0	0
ACOT6	0	0	0	0	0	0	3	0	0	0	0	0	1	0	4	0	0	1	0	0	0	0	1	0	1	1	3	0	0	0	0	0	0	0	0	0	0	1	3	0	0	1	0	5	0	0	0	0	2
ACOT7	1	3	0	0	0	7	10	2	11	5	12	16	7	19	15	16	6	21	21	27	15	6	6	6	11	13	6	9	10	9	4	10	20	13	8	9	4	13	23	15	34	25	8	8	8	4	16	4	6
ACOT8	0	4	0	3	2	2	3	1	10	6	6	8	8	11	12	4	12	11	14	11	5	8	13	1	8	9	3	9	5	8	3	7	14	8	9	10	7	5	21	13	14	30	6	16	9	10	4	8	8
ACOT9	71	140	60	102	59	44	144	95	208	213	111	128	304	282	229	197	154	198	325	290	168	190	223	141	421	419	239	207	167	229	182	285	375	250	172	172	159	249	392	388	464	463	305	221	120	168	359	216	159
ACOX1	17	50	26	29	16	28	25	18	41	26	39	43	25	31	44	31	18	27	28	23	26	31	13	17	16	18	40	32	56	30	15	34	35	13	9	19	39	21	23	31	51	49	37	40	39	31	18	11	11
ACOX2	0	1	0	0	0	0	0	0	0	0	0	0	0	0	0	0	0	0	0	0	0	0	0	0	0	0	0	0	0	0	0	0	0	0	0	0	0	0	0	0	0	0	0	0	0	0	0	0	0
ACOX3	0	0	0	0	0	0	0	0	0	0	5	0	1	0	2	1	0	0	0	0	0	1	0	1	2	0	0	0	1	0	1	0	0	0	3	2	0	1	2	0	0	0	0	0	0	0	0	0	0
ACOXL	1	2	3	2	0	1	3	0	0	1	2	4	4	1	1	5	3	2	3	1	0	1	1	1	0	5	1	4	3	8	0	6	1	0	1	1	0	6	2	3	8	6	1	0	0	0	14	1	1
ACP1	13	22	21	37	21	38	60	37	38	64	57	80	75	68	79	101	111	161	122	111	45	68	71	70	89	77	73	55	58	63	69	105	121	97	37	59	73	93	116	130	148	177	59	37	36	52	11	3	8
ACP2	0	3	1	3	0	6	4	1	4	3	5	4	13	10	3	7	9	9	14	15	11	7	5	3	2	4	5	4	5	8	6	5	13	8	4	6	7	11	19	16	12	15	13	6	2	16	13	6	5
ACP4	0	0	0	0	0	0	0	0	0	0	0	0	0	0	0	0	0	0	0	0	0	0	0	0	0	0	0	1	0	0	0	1	0	0	0	0	0	0	0	0	0	0	0	0	0	0	1	0	0
ACP5	0	2	0	0	0	0	1	0	0	0	0	0	0	0	2	1	1	0	2	1	1	0	1	0	0	1	2	2	0	0	0	0	0	0	0	0	2	0	0	0	0	0	0	0	0	0	0	0	0
ACP6	10	28	19	8	9	12	32	12	36	47	57	50	71	55	93	80	61	69	70	72	41	33	35	33	60	71	83	87	92	109	61	83	112	48	50	65	53	60	209	157	177	156	86	90	62	120	60	22	42
ACP7	0	0	0	0	0	0	0	0	0	1	0	0	0	0	0	0	0	0	0	2	0	0	0	0	0	0	0	0	0	0	0	0	0	0	0	0	4	0	0	0	0	0	0	0	0	0	0	0	0
ACPP	0	0	0	3	0	1	0	0	0	0	0	0	0	0	1	0	0	0	0	0	0	0	0	0	0	0	3	0	0	0	0	0	0	0	0	1	0	0	0	0	0	0	0	0	0	0	0	0	0
ACR	0	0	0	0	0	0	0	0	0	0	0	0	0	0	0	0	0	0	0	0	0	0	0	0	0	0	0	0	0	0	0	0	0	0	0	0	0	0	0	0	0	0	0	0	0	0	0	0	0
ACRBP	0	0	0	1	0	0	0	0	0	0	0	0	1	0	0	0	0	0	0	0	0	0	0	0	0	0	0	0	0	0	0	0	0	0	0	0	0	0	0	0	0	0	0	0	0	0	0	0	0
ACRV1	51	43	12	58	115	39	31	25	51	52	93	98	8	28	69	75	30	26	76	65	37	69	33	35	11	18	59	36	28	39	11	32	25	12	28	15	20	36	29	35	60	31	40	48	25	29	14	11	13
ACSBG1	0	0	0	3	0	0	0	2	1	0	0	1	0	3	0	2	0	0	1	1	0	0	0	0	0	0	2	0	0	0	0	0	1	0	0	0	0	0	0	0	0	0	0	0	0	0	0	6	0
ACSBG2	0	3	0	0	0	0	0	0	0	2	2	0	2	0	1	0	1	0	1	0	0	0	0	0	0	0	2	4	1	3	2	0	0	0	0	3	0	1	5	0	1	2	1	0	0	7	6	9	1
ACSF2	0	0	0	0	0	0	0	0	0	0	0	0	0	0	0	1	0	0	1	0	1	0	0	0	0	0	1	0	0	1	0	0	0	0	0	0	0	0	0	0	0	0	0	0	0	0	0	0	0
ACSF3	0	0	4	0	0	0	0	0	0	0	0	1	0	0	0	0	0	0	0	0	0	0	0	0	0	0	0	0	0	0	0	0	0	0	0	0	0	1	1	5	2	0	0	2	2	1	0	0	0
ACSL1	0	8	6	3	1	2	4	4	3	14	4	9	21	7	19	12	14	11	9	9	11	11	13	2	18	15	10	9	17	3	5	27	29	10	7	8	12	17	47	21	24	45	4	11	16	20	5	2	14
ACSL3	280	236	135	146	181	155	311	209	242	263	315	350	333	352	435	311	291	292	387	321	432	466	406	251	390	344	452	303	316	326	330	652	498	390	392	511	399	390	616	576	568	698	475	592	777	716	107	102	123
ACSL4	21	98	53	34	13	43	56	40	64	50	94	76	67	31	51	49	50	69	54	57	42	41	51	38	77	59	48	48	49	72	43	52	89	49	27	35	29	38	86	92	88	49	84	29	49	64	40	23	20
ACSL5	1	19	9	6	7	4	20	10	23	13	21	37	27	5	29	24	13	24	42	30	16	26	23	22	31	19	36	18	41	21	17	23	54	25	17	39	33	48	57	57	39	75	54	34	17	51	17	21	31
ACSL6	4	10	12	7	3	2	7	10	8	3	18	15	28	20	7	11	12	14	25	13	7	6	3	2	7	4	19	4	7	11	2	18	11	6	8	11	9	11	22	31	20	31	12	15	7	35	19	3	5
ACSM1	0	0	0	0	0	0	0	0	0	0	0	0	0	0	0	0	0	0	0	0	0	0	0	0	0	0	0	0	0	0	0	0	0	0	0	0	0	0	0	0	0	0	0	0	0	0	0	0	0
ACSM2B	0	0	0	0	0	0	0	0	0	0	0	0	0	0	0	0	0	0	0	0	0	0	0	0	0	0	0	0	0	0	0	0	0	0	0	0	0	0	0	0	1	0	0	0	0	0	0	0	0
ACSM3	4	3	2	0	2	0	0	1	3	2	5	0	0	3	3	2	0	2	2	2	1	1	3	2	3	3	3	8	5	3	1	2	1	4	2	1	3	0	2	1	4	3	2	4	0	5	0	0	1
ACSM4	18	57	35	44	54	33	104	62	80	77	75	55	57	61	64	63	43	53	60	34	56	50	56	45	105	88	78	65	96	62	25	78	82	52	26	38	48	60	99	101	84	84	82	94	77	71	78	37	43
ACSM5	0	0	0	0	0	0	0	0	0	0	0	0	2	0	0	0	0	0	0	0	0	0	0	0	0	0	0	0	0	0	0	0	0	0	0	0	0	0	0	0	0	0	0	0	0	0	0	0	0
ACSS1	0	0	0	0	0	0	0	0	0	0	0	2	0	0	0	0	0	2	0	0	0	1	0	0	0	0	0	0	4	0	0	0	2	2	0	0	1	0	0	6	1	0	2	0	4	0	1	0	0
ACSS2	3	1	0	1	0	3	5	0	0	2	4	0	6	1	13	7	3	1	4	9	3	4	3	7	9	6	7	4	12	3	3	5	13	9	8	12	10	9	20	19	13	18	1	8	15	7	4	3	1
ACSS3	8	3	6	3	6	6	5	4	5	13	0	0	5	2	21	8	3	8	7	3	4	2	2	1	8	4	7	6	4	12	1	4	9	4	2	0	3	2	9	14	17	3	1	4	6	10	6	5	0
ACTA1	0	1	0	0	0	0	0	0	0	0	0	0	0	0	0	0	0	0	0	0	0	0	0	0	0	0	0	0	0	0	0	0	0	0	0	0	0	0	0	0	0	0	0	0	0	0	0	0	0
ACTA2	6	1	17	10	9	20	8	3	20	20	3	6	5	9	14	12	5	5	18	11	6	18	6	4	3	5	8	14	5	17	19	19	28	25	4	2	12	13	5	9	9	17	10	9	5	9	12	9	2
ACTB	138	376	185	320	224	296	400	278	550	369	817	953	1131	1163	1410	964	674	671	550	654	1257	1124	816	426	1369	1116	637	594	711	770	707	1420	1481	939	1290	1377	1335	1751	1216	1410	1245	1391	1538	1595	1320	1878	1150	801	764
ACTBL2	0	0	0	0	0	0	0	0	0	0	0	0	0	0	0	0	0	0	0	0	0	0	0	0	0	0	0	0	0	0	0	0	0	0	0	0	0	0	0	0	0	0	0	0	0	0	0	0	0
ACTC1	0	1	0	0	0	0	0	0	0	0	0	0	0	0	0	1	0	3	0	1	0	0	0	0	1	0	0	0	0	0	0	0	1	0	0	0	0	0	0	0	0	0	0	0	0	0	0	0	0
ACTG1	88	178	136	154	92	152	175	102	191	176	435	471	433	473	781	519	307	318	359	325	465	533	543	270	621	448	482	521	648	799	205	355	362	310	357	316	321	482	576	570	540	610	741	792	576	761	513	260	252
ACTG2	0	0	0	0	0	0	0	0	0	0	0	0	0	0	0	0	0	0	0	0	0	0	0	0	0	0	0	0	0	0	0	0	3	0	0	0	0	0	0	0	0	0	0	0	0	0	0	0	0
ACTL6A	109	120	92	183	125	122	139	96	114	129	130	155	148	146	205	203	142	142	174	132	140	166	174	142	143	110	243	171	229	248	79	189	209	157	85	95	130	143	271	239	261	242	171	168	131	170	165	82	123
ACTL6B	0	2	0	0	0	0	0	1	0	0	2	0	0	3	0	0	0	2	0	0	0	0	0	0	2	2	0	3	1	0	0	0	2	0	0	0	0	0	1	2	0	1	1	0	0	0	0	1	0
ACTL7A	0	0	0	0	0	0	0	0	0	0	0	0	0	0	0	0	0	0	0	0	0	0	0	0	0	0	0	0	0	0	0	0	0	0	0	0	0	0	0	0	0	0	0	0	0	0	0	0	0
ACTL7B	2	2	0	3	4	3	4	2	2	1	2	3	4	4	2	1	0	0	12	4	0	3	1	3	2	3	4	4	0	2	0	0	0	0	1	0	1	0	4	7	2	5	3	1	4	0	1	1	0
ACTL8	0	0	1	0	0	0	2	1	2	0	2	1	0	4	1	0	7	1	6	5	2	4	7	1	2	9	6	9	3	7	2	3	6	0	1	2	4	3	9	7	5	1	7	7	5	2	3	2	0
ACTL9	0	0	0	0	0	0	0	0	0	0	0	0	0	0	0	0	0	0	0	0	0	0	0	0	0	0	0	0	0	0	0	0	0	0	0	0	0	0	0	0	0	0	0	0	0	0	0	0	0
ACTN1	5	22	23	21	11	8	50	17	21	18	64	91	77	64	116	66	77	78	73	68	68	70	69	33	75	57	90	80	54	70	93	153	158	111	23	80	177	146	38	230	187	196	14	70	87	91	28	19	9
ACTN2	0	1	0	1	1	0	0	2	2	0	0	0	0	3	0	2	0	0	0	4	0	2	0	2	3	2	0	0	0	0	0	0	0	0	0	0	1	1	0	0	0	1	0	0	0	0	0	0	0
ACTN3	0	0	0	0	0	0	0	0	0	0	0	2	0	0	1	0	0	2	0	0	0	0	0	0	0	0	0	0	0	0	0	2	0	1	0	0	0	0	0	0	0	0	0	0	0	0	0	0	0
ACTN4	11	25	20	16	5	9	19	11	34	20	25	37	39	30	69	54	44	38	45	37	27	27	42	36	42	37	40	58	37	51	49	105	86	64	33	71	45	54	82	113	96	117	47	59	42	61	61	38	33
ACTR10	172	286	136	218	221	305	291	312	294	233	221	265	282	244	283	292	214	223	280	210	146	200	154	198	283	262	302	283	445	354	86	175	170	126	133	109	92	169	240	198	265	226	356	232	220	295	248	98	115
ACTR1A	0	17	12	9	5	7	41	8	16	15	51	72	87	112	83	76	47	74	69	59	96	59	79	47	83	78	54	42	52	80	72	118	141	110	90	108	113	126	155	209	181	211	90	94	156	128	105	81	55
ACTR1B	0	0	0	0	0	0	0	0	0	2	0	0	1	0	1	1	2	1	0	0	0	0	0	0	0	2	0	1	0	2	2	2	0	1	0	1	5	1	3	2	4	1	0	1	1	1	1	1	1
ACTR2	62	164	83	104	89	106	144	118	155	156	162	224	266	290	307	251	227	228	264	198	246	229	263	182	282	261	292	229	237	214	219	327	419	291	325	387	432	417	598	501	525	499	391	360	290	498	364	249	185
ACTR3	113	103	62	144	78	110	149	91	174	136	163	129	233	198	198	158	175	224	216	165	188	204	150	148	206	213	228	157	196	171	183	336	293	218	273	191	216	282	355	358	330	385	272	258	249	337	272	165	171
ACTR3B	0	3	5	1	3	2	2	5	2	1	5	11	1	12	9	10	16	6	7	5	7	5	12	7	10	6	13	15	10	5	2	2	7	6	0	1	2	6	0	6	12	10	4	1	4	17	0	3	0
ACTR5	0	0	1	1	0	0	2	0	0	0	0	1	0	9	0	2	0	3	0	3	5	3	7	2	2	3	4	2	2	0	0	2	4	0	0	0	0	1	1	1	2	0	3	0	5	6	0	10	0
ACTR6	166	342	172	448	245	398	292	405	268	359	184	219	295	251	269	296	333	433	488	435	258	269	267	253	469	379	417	264	253	281	149	299	296	188	224	156	166	272	358	377	342	337	337	189	177	232	468	236	217
ACTR8	16	34	15	27	26	21	34	17	35	37	74	76	87	77	62	57	72	81	69	62	65	69	65	32	122	94	56	55	97	83	47	96	125	70	51	47	79	87	91	119	130	131	112	119	88	137	80	77	72
ACTRT2	0	0	0	0	0	0	0	0	0	0	0	0	0	0	0	0	0	0	0	0	0	0	0	0	0	0	0	0	0	0	0	0	0	0	0	0	0	0	0	0	0	0	0	0	0	0	0	0	0
ACTRT3	0	0	1	1	0	2	1	0	1	0	0	0	0	1	1	3	0	2	1	4	0	6	2	0	5	4	3	1	3	0	0	0	3	0	1	0	0	5	2	0	3	0	4	0	0	2	4	2	1
ACVR1	48	51	24	16	27	27	46	47	41	25	34	54	29	25	68	41	34	36	54	32	27	24	29	39	35	14	50	28	49	34	27	37	33	36	20	22	27	19	72	75	54	50	21	26	6	18	44	24	33
ACVR1B	12	27	17	5	13	9	39	8	34	23	38	86	27	48	75	56	48	26	46	28	34	32	47	20	91	60	55	54	83	94	17	28	34	26	22	19	22	22	28	24	33	27	52	22	24	30	45	41	24
ACVR1C	0	0	0	0	0	0	0	0	0	0	0	0	0	0	0	0	0	0	0	0	0	0	0	0	0	0	1	0	0	0	0	0	0	0	0	0	0	0	0	0	0	0	0	0	0	0	0	0	0
ACVR2A	2	14	7	8	6	7	18	4	23	15	18	16	28	34	23	22	40	23	15	23	18	25	41	16	42	45	40	45	22	21	24	24	50	26	7	37	38	28	43	52	90	60	17	19	14	40	23	8	27
ACVR2B	3	20	5	2	0	1	9	4	23	6	6	14	13	16	17	12	12	3	14	10	12	15	13	6	19	27	16	23	10	9	6	22	14	7	15	21	15	19	16	18	10	10	21	2	6	8	15	11	12
ACVRL1	2	3	0	1	0	0	2	1	0	1	2	1	1	1	8	2	2	2	3	2	2	0	1	2	0	0	2	1	0	0	2	0	0	0	0	0	0	0	0	1	0	3	0	0	4	0	1	0	0
ACY1	0	2	3	1	1	0	4	1	3	2	0	5	3	6	7	1	6	6	5	6	1	3	3	0	1	4	1	3	0	3	0	6	7	2	1	0	9	3	10	7	4	3	1	0	2	4	1	3	0
ACYP1	67	27	18	53	41	56	31	30	30	35	21	17	33	31	40	25	27	62	32	40	15	19	15	27	44	34	35	21	18	37	4	16	27	10	17	13	25	27	37	35	52	36	34	16	8	25	25	18	15
ACYP2	43	6	6	29	27	7	7	7	13	11	8	10	18	8	19	36	23	9	37	25	18	11	19	16	12	23	11	17	12	10	14	5	7	11	3	6	6	5	10	20	12	12	20	10	8	14	11	9	5
ADA	0	11	10	4	0	3	5	2	9	9	14	12	11	12	1	7	6	6	10	9	5	11	5	4	27	23	9	7	7	14	10	10	14	6	3	18	20	23	14	21	28	23	19	12	5	17	27	26	7
ADA2	0	0	0	0	0	0	0	0	0	0	0	0	0	0	0	0	0	0	0	0	0	0	0	0	0	0	0	0	0	0	0	0	0	0	0	0	0	0	0	0	0	0	0	0	0	0	0	0	0
ADAD1	57	85	60	77	40	51	111	62	100	99	98	149	166	141	123	140	135	139	149	118	100	111	105	101	147	148	179	183	154	174	76	133	135	100	115	91	96	121	184	132	173	206	147	128	131	167	98	78	98
ADAD2	1	4	1	1	0	0	4	1	0	3	3	0	6	3	14	8	10	13	18	10	12	5	6	3	5	8	7	14	3	1	2	10	15	2	2	6	0	9	17	8	14	20	10	4	5	7	3	5	1
ADAL	18	68	33	38	14	29	53	42	41	36	60	80	89	95	82	74	66	84	121	75	54	51	82	51	117	136	64	57	70	83	67	115	143	104	75	74	64	44	190	183	146	154	105	90	61	92	148	109	83
ADAM10	119	229	138	154	137	112	256	129	243	244	301	323	323	267	218	322	301	351	332	237	259	306	257	202	353	308	379	264	448	255	201	349	277	230	236	281	316	342	410	464	428	495	387	280	268	337	380	201	218
ADAM11	0	3	0	1	0	5	4	0	0	0	1	3	7	1	6	8	1	4	8	4	2	3	4	6	0	3	1	13	2	7	7	14	7	5	3	8	11	13	21	8	16	15	0	13	5	6	3	6	3
ADAM12	0	3	1	1	2	0	2	1	7	3	6	3	7	11	13	5	1	7	9	5	4	15	7	4	3	3	4	15	8	10	2	6	8	6	16	6	7	4	17	27	11	20	12	25	13	16	9	5	7
ADAM15	0	0	0	0	0	0	0	0	1	0	0	0	0	0	0	0	0	0	0	0	0	0	0	0	0	0	0	0	0	0	0	1	0	0	0	0	0	0	0	1	0	0	0	0	0	1	0	0	0
ADAM17	12	63	29	16	51	22	58	42	34	48	82	87	73	58	59	71	51	55	90	71	35	64	52	59	57	59	73	74	62	73	29	37	60	27	31	32	34	65	46	65	54	79	70	68	74	85	75	53	30
ADAM18	0	0	0	0	0	0	0	0	0	0	0	0	0	0	0	0	0	0	0	0	0	0	0	0	0	0	0	0	0	0	0	0	0	0	0	0	0	0	0	0	0	0	0	0	0	0	0	0	0
ADAM19	39	261	110	55	63	50	300	114	227	149	325	430	437	331	570	493	249	344	395	308	289	326	346	249	392	333	404	323	555	558	161	303	344	215	227	247	224	328	408	439	481	448	487	397	301	401	273	158	157
ADAM1A	0	0	0	0	0	0	0	0	0	0	0	0	0	0	0	0	0	0	0	0	0	0	0	0	0	0	0	0	0	0	0	0	0	0	0	0	0	0	0	0	0	0	0	0	0	0	0	0	0
ADAM2	0	0	0	0	0	0	0	0	0	0	0	0	0	0	0	0	0	0	0	0	0	0	0	0	0	0	0	0	0	0	0	0	0	0	0	0	0	0	0	0	0	0	0	0	0	0	0	0	0
ADAM20	0	0	0	0	0	0	0	0	0	0	0	3	0	0	4	0	0	0	0	0	0	0	0	0	0	0	1	0	0	0	0	0	0	0	0	0	0	0	0	1	1	0	3	0	0	0	0	0	0
ADAM21	0	0	0	0	0	0	0	0	0	0	0	0	0	0	0	0	0	0	0	0	0	0	0	0	0	0	0	0	0	0	0	0	0	0	0	0	0	0	0	0	0	0	0	0	0	0	0	0	0
ADAM22	2	1	1	1	0	5	1	0	4	4	0	1	3	1	0	0	1	7	4	1	2	1	1	2	6	1	9	2	2	2	0	5	3	5	1	1	0	0	1	3	0	0	2	3	0	9	11	0	1
ADAM23	0	1	2	1	0	0	0	0	0	0	0	0	2	4	6	0	2	3	4	1	0	1	1	0	7	3	1	3	5	2	0	2	3	2	1	0	0	3	0	0	1	0	0	0	4	4	0	0	0
ADAM29	0	0	0	0	0	0	0	0	0	0	0	0	0	0	0	0	0	0	0	0	0	0	0	0	0	0	0	0	0	0	0	0	0	0	0	0	0	0	0	0	0	0	0	0	0	0	0	0	0
ADAM32	0	0	0	0	1	0	0	0	0	0	0	0	0	1	0	0	0	0	0	0	0	0	0	3	2	0	1	0	0	0	0	0	1	0	1	0	0	0	0	1	0	0	0	0	0	0	2	1	0
ADAM33	0	0	0	0	0	0	0	0	0	0	0	0	0	0	0	0	0	0	0	0	0	0	0	0	0	0	0	0	0	0	0	0	0	0	0	0	0	0	0	0	0	0	0	0	0	0	0	0	0
ADAM3A	0	0	0	0	0	0	0	0	0	0	0	0	0	0	0	0	0	0	0	0	0	0	0	0	0	0	0	0	0	0	0	0	0	0	0	0	0	0	0	0	0	0	0	0	0	0	0	0	0
ADAM7	0	0	0	0	0	0	0	0	0	0	0	0	0	0	0	0	0	0	0	0	0	0	0	0	0	0	0	0	0	0	0	0	0	0	0	0	0	0	0	0	0	0	0	0	0	0	0	0	0
ADAM8	0	0	0	0	0	0	0	0	0	0	0	0	0	0	0	0	0	0	0	0	0	0	0	0	0	0	0	0	0	0	0	0	0	0	0	0	0	0	0	0	0	0	0	0	2	2	0	0	0
ADAM9	0	17	4	5	7	1	9	5	6	2	2	1	6	7	6	6	1	7	3	9	9	10	3	5	7	10	5	1	5	5	3	5	2	4	2	2	5	5	8	9	4	8	11	3	4	4	0	1	0
ADAMDEC1	0	0	0	0	0	0	0	0	0	0	0	0	0	1	0	0	0	0	0	5	0	0	0	0	0	0	0	0	0	0	0	0	0	0	0	0	0	0	0	0	0	0	2	0	0	0	0	0	0
ADAMTS1	0	0	0	0	0	0	0	0	0	0	0	0	0	0	0	0	0	0	0	0	0	0	0	0	0	0	0	0	0	0	0	0	0	0	0	0	0	0	0	0	0	0	0	0	0	0	0	0	0
ADAMTS10	0	0	0	0	0	0	1	0	0	0	1	0	1	0	0	0	0	0	0	0	0	0	0	0	0	3	0	0	0	0	1	0	0	0	0	0	3	0	0	0	0	0	0	0	0	1	0	0	0
ADAMTS12	8	34	12	14	7	13	23	14	27	21	26	30	34	44	58	42	21	49	35	40	37	36	21	31	62	49	49	54	36	55	13	28	38	21	7	16	18	22	46	62	39	27	34	34	40	41	50	23	11
ADAMTS13	0	0	0	0	0	0	0	0	0	0	0	0	0	0	0	0	0	0	0	0	0	0	0	0	0	0	0	0	0	0	0	0	0	0	0	0	0	0	0	0	0	0	0	0	0	0	0	0	0
ADAMTS14	0	0	0	0	0	0	3	0	1	0	6	12	7	7	8	7	3	5	1	9	10	5	6	2	6	8	8	6	2	4	2	6	11	1	11	8	3	7	12	10	10	4	8	2	8	6	3	5	1
ADAMTS15	0	0	0	0	0	0	0	0	0	0	0	0	0	0	0	0	0	0	0	0	0	0	0	0	0	0	0	0	0	0	0	0	0	0	0	0	0	0	0	0	0	0	0	0	0	0	0	0	0
ADAMTS16	0	3	2	0	0	0	0	0	0	0	0	0	0	0	0	0	1	0	1	1	0	1	0	0	0	0	0	6	0	1	1	0	3	2	1	0	0	0	1	1	2	0	1	2	0	0	6	0	4
ADAMTS17	1	0	2	3	0	2	0	2	1	1	1	0	2	0	2	3	2	0	5	5	0	0	1	0	1	3	1	0	4	1	0	3	3	4	2	1	0	6	0	6	1	4	2	0	3	7	1	2	0
ADAMTS18	25	32	18	18	19	17	33	24	23	28	23	34	34	17	54	47	31	26	45	47	21	21	23	32	41	33	36	27	49	56	40	57	56	15	31	34	69	32	70	54	50	92	42	27	43	74	24	11	42
ADAMTS19	0	0	3	1	2	0	2	1	0	2	0	0	1	1	4	4	0	0	7	0	1	1	0	0	0	0	0	0	1	8	1	0	0	1	0	0	1	1	0	1	0	1	0	3	0	0	1	0	0
ADAMTS2	0	0	0	0	1	0	0	0	3	0	0	0	4	0	1	0	3	1	4	2	0	0	1	0	0	0	0	2	0	0	0	4	7	3	4	0	0	0	0	3	0	0	0	0	0	3	1	2	0
ADAMTS20	0	2	0	0	0	1	0	0	1	0	0	2	2	0	0	0	0	0	0	0	0	0	0	0	0	0	1	0	1	0	0	0	0	0	0	0	0	0	0	0	0	0	0	0	0	0	0	0	0
ADAMTS3	0	3	0	0	0	3	0	0	0	0	1	2	0	2	0	4	4	1	2	3	3	1	1	0	0	0	0	2	0	1	3	2	2	0	2	0	3	0	0	0	0	1	0	3	2	5	5	12	1
ADAMTS4	0	6	3	8	4	2	2	3	0	10	5	7	13	10	39	18	16	10	20	16	22	29	27	13	22	20	17	5	4	8	23	52	37	21	43	41	43	34	48	46	52	55	26	40	50	44	30	22	10
ADAMTS5	0	0	0	0	0	0	0	0	0	0	0	0	0	0	0	0	0	0	0	0	0	0	0	0	0	0	0	0	0	0	0	0	0	0	0	0	0	0	0	0	0	0	0	0	0	0	0	0	0
ADAMTS6	0	0	0	3	1	1	0	0	0	0	0	0	1	0	0	0	0	2	4	0	1	1	0	1	3	1	0	2	0	4	0	0	2	0	1	0	0	1	1	0	5	4	0	1	0	0	6	0	4
ADAMTS7	0	1	4	1	0	1	5	0	4	3	7	7	8	8	7	3	7	3	3	6	7	2	6	3	3	4	4	8	4	6	4	1	7	1	0	4	6	3	0	16	10	14	2	1	7	6	0	3	0
ADAMTS8	0	0	0	0	0	0	0	0	0	0	0	0	0	0	0	0	0	0	0	0	0	0	0	0	0	0	0	0	0	0	0	0	0	0	0	0	0	0	2	0	0	0	0	0	0	0	0	0	0
ADAMTS9	0	6	3	1	0	3	8	9	6	7	0	0	0	2	5	8	1	1	9	4	2	3	0	5	14	2	2	1	8	4	4	4	8	1	8	2	15	3	0	0	0	5	4	2	4	2	8	0	2
ADAMTSL1	2	4	2	2	0	3	5	1	5	5	8	23	18	27	22	13	20	15	16	10	13	24	29	9	20	16	10	18	20	6	22	31	38	35	37	41	46	49	79	69	61	65	16	28	14	32	33	5	6
ADAMTSL2	0	0	0	0	0	0	0	0	0	0	0	0	0	0	0	0	0	0	0	0	0	0	0	0	0	0	0	2	0	0	0	0	0	0	0	0	0	0	0	0	0	0	0	0	0	0	0	1	0
ADAMTSL3	0	0	0	0	0	0	0	0	0	0	0	0	0	0	0	0	0	0	0	0	0	0	0	0	0	0	0	0	0	0	0	0	0	0	0	0	0	0	0	0	0	0	0	0	0	0	0	0	0
ADAMTSL4	0	0	0	0	0	0	0	0	0	0	0	0	0	0	0	1	0	3	0	0	0	0	0	0	0	0	0	0	0	0	0	0	0	0	0	0	0	0	0	0	0	0	0	0	0	0	0	0	0
ADAMTSL5	1	2	0	1	2	1	2	0	3	1	2	5	13	9	6	5	2	4	7	1	4	2	6	11	3	4	11	15	7	4	3	10	19	3	10	12	12	9	11	13	3	13	10	8	12	12	6	1	2
ADAP1	5	8	15	3	4	3	28	8	14	9	30	30	30	26	52	26	23	29	35	22	24	22	28	20	37	19	54	39	17	48	16	32	32	20	15	23	37	26	52	40	39	49	32	48	26	38	47	25	15
ADAP2	0	0	0	0	0	0	0	0	0	0	0	0	0	0	0	0	0	0	0	0	0	0	0	0	0	0	0	0	0	0	0	0	0	0	0	0	0	0	0	0	0	0	0	0	0	1	0	0	0
ADAR	8	63	28	22	15	5	73	16	60	60	91	70	95	101	235	162	132	127	156	100	93	114	110	65	120	148	151	102	156	132	91	142	103	84	97	118	91	111	217	202	218	266	191	209	143	189	145	102	87
ADARB1	0	3	0	1	0	0	1	0	0	0	3	1	1	2	11	6	3	2	2	5	2	4	6	1	1	6	1	2	2	2	4	1	7	5	0	3	5	5	4	4	5	15	3	0	2	6	1	1	3
ADARB2	0	0	0	0	0	0	0	0	0	0	0	0	0	0	0	0	0	0	0	0	0	0	0	0	0	0	0	0	0	0	0	0	0	0	0	0	0	0	0	0	0	0	0	0	0	0	0	0	0
ADAT1	7	23	7	9	8	17	22	22	14	19	25	33	60	29	37	25	36	30	31	43	24	26	18	17	48	20	43	19	17	16	11	23	21	7	29	24	15	14	23	42	24	38	21	21	28	20	24	27	11
ADAT2	2	13	2	5	8	8	12	14	12	8	3	8	8	13	11	12	6	8	19	22	10	13	11	11	9	16	14	28	11	10	4	5	4	9	10	9	8	14	6	17	35	14	5	6	5	9	28	0	11
ADCK1	0	6	14	2	1	2	10	3	3	8	22	30	27	42	18	23	16	19	14	15	8	14	21	16	35	37	32	30	35	45	15	31	47	29	31	41	30	54	55	68	65	50	66	51	49	68	42	21	17
ADCK2	5	15	4	9	8	7	7	5	6	2	5	7	19	5	13	8	10	11	16	14	6	6	17	11	16	14	12	14	13	11	4	7	14	11	8	12	16	11	8	33	22	18	9	8	3	14	9	4	2
ADCK5	0	3	0	0	1	1	0	0	0	0	2	0	0	0	0	0	1	0	4	5	1	0	2	0	4	2	2	1	3	0	3	8	6	2	3	2	2	1	7	1	3	5	1	4	6	0	0	0	2
ADCY1	0	0	0	0	0	0	0	0	0	0	0	0	0	0	0	0	0	0	0	0	0	0	0	0	0	0	0	0	0	0	0	0	0	0	0	0	0	0	0	0	0	0	0	0	0	0	0	0	0
ADCY10	0	0	0	0	0	0	0	0	0	0	0	0	0	0	0	0	0	0	0	0	0	0	0	0	0	0	0	0	0	0	0	0	0	0	0	0	0	0	0	0	0	0	0	0	0	0	0	0	0
ADCY2	2	23	7	7	3	6	21	7	4	12	9	23	19	15	23	6	5	13	11	13	7	17	9	3	23	16	24	16	35	28	4	12	15	9	4	9	6	10	10	16	9	15	18	4	5	7	19	9	10
ADCY3	0	1	0	1	2	2	8	1	4	6	4	4	9	5	2	8	8	8	5	13	7	8	11	1	4	1	7	6	1	6	9	2	12	5	6	8	5	8	19	14	20	10	5	3	10	6	7	7	2
ADCY4	0	0	0	0	0	0	0	0	0	0	0	0	0	0	0	0	0	0	0	0	0	0	0	0	0	0	0	0	0	0	0	0	0	0	0	0	0	0	0	0	0	0	0	0	0	0	0	0	0
ADCY5	0	0	0	0	0	3	2	0	1	1	2	2	10	3	4	5	4	6	9	11	1	7	11	8	0	0	2	1	1	2	0	3	8	9	1	0	1	3	2	7	17	8	0	1	1	0	1	1	0
ADCY6	0	1	5	0	0	0	1	1	3	0	4	3	5	5	14	6	0	1	1	3	8	4	1	1	3	5	2	1	7	5	1	9	7	6	5	0	5	7	7	7	8	3	1	6	0	8	7	5	1
ADCY7	0	4	7	5	4	3	8	2	2	4	12	9	6	5	18	18	9	8	4	13	3	9	11	17	10	6	10	7	8	5	15	15	7	16	11	12	8	6	11	26	30	13	14	4	10	15	17	2	3
ADCY8	0	3	0	4	1	3	0	4	1	0	2	1	4	4	0	1	0	0	1	0	0	0	0	0	1	3	0	0	0	5	0	1	0	0	0	0	0	0	0	1	0	0	7	0	0	1	0	0	1
ADCY9	2	23	21	8	13	11	16	17	33	31	35	68	36	47	96	54	40	43	48	45	38	37	39	33	49	27	37	44	54	57	21	36	36	29	40	44	46	20	52	57	74	69	47	26	37	50	59	31	48
ADCYAP1	1	1	2	2	5	1	2	2	4	1	1	1	0	0	1	4	6	5	5	1	4	2	3	0	0	0	0	1	0	1	1	0	1	2	0	0	1	2	1	2	0	1	2	0	1	1	1	2	0
ADCYAP1R1	0	0	0	0	0	0	0	0	0	0	0	0	0	0	0	0	0	1	0	0	0	0	0	0	0	0	0	0	0	0	0	0	0	0	0	0	0	0	0	0	0	0	0	0	0	0	0	0	0
ADD1	15	38	42	27	9	31	77	25	66	53	125	142	97	86	176	153	130	114	171	152	108	107	117	105	106	86	112	96	158	131	49	80	99	80	37	60	71	92	99	151	148	122	85	92	95	108	71	61	25
ADD2	0	8	4	3	2	1	2	2	4	2	4	15	3	9	3	6	4	2	9	7	1	7	5	2	3	3	11	4	1	7	6	5	4	2	8	10	10	8	3	10	4	13	14	5	17	4	13	6	13
ADD3	398	509	381	303	263	288	725	467	528	531	1160	1110	901	954	1054	779	1010	870	876	720	1073	1049	993	602	1142	919	1374	947	1094	956	744	1305	1199	868	803	707	726	686	1398	1309	1328	1355	1112	1256	1222	1278	1019	838	608
ADGB	0	0	0	0	0	0	0	0	0	0	0	0	0	0	0	0	0	4	0	0	2	0	0	0	0	0	0	0	0	0	0	0	0	0	0	0	0	0	0	0	0	0	0	0	0	0	0	0	0
ADGRA1	0	0	0	0	0	0	0	0	0	0	0	1	0	0	0	0	0	0	0	0	0	0	0	0	0	0	0	0	0	0	0	0	0	0	0	0	0	0	0	0	0	0	0	0	0	0	0	0	0
ADGRA2	1	1	0	1	0	0	1	0	0	0	5	5	1	0	7	1	0	2	1	2	0	0	1	1	2	1	1	1	1	3	1	0	0	2	0	1	2	2	2	3	2	0	1	1	1	1	1	0	0
ADGRA3	18	41	29	32	15	19	43	36	84	46	65	84	61	72	101	59	46	80	121	98	59	79	88	62	78	60	86	58	49	77	46	82	71	79	34	47	53	62	79	65	71	97	90	79	68	101	89	55	71
ADGRB1	0	0	0	0	0	0	0	0	0	0	0	0	0	0	0	0	0	1	0	0	0	0	0	0	0	0	0	0	0	0	0	0	0	0	0	0	0	0	0	1	0	0	0	0	0	0	0	0	0
ADGRB2	0	0	0	0	1	1	0	2	1	1	5	0	4	1	7	3	1	0	0	1	1	1	3	0	1	1	5	2	3	0	0	0	3	1	1	0	5	3	3	7	1	2	0	2	1	1	2	2	3
ADGRB3	5	8	4	10	8	5	4	4	10	9	5	8	2	5	11	7	2	11	6	1	6	16	10	13	4	3	4	5	5	9	5	8	6	5	9	3	7	12	15	17	19	13	6	3	1	11	14	4	4
ADGRD1	0	0	0	0	0	0	0	0	0	0	0	0	0	1	0	0	0	0	0	0	0	0	0	0	0	1	0	0	0	0	0	0	0	0	0	0	0	0	0	0	1	0	1	0	0	0	0	0	0
ADGRD2	0	0	0	0	0	0	0	0	0	0	0	0	0	0	0	0	0	0	1	0	0	0	0	0	0	0	0	0	0	0	0	0	0	0	0	0	0	0	0	0	0	1	0	0	0	0	0	0	0
ADGRE3	0	0	0	0	0	0	0	0	0	0	0	0	0	0	0	0	0	0	0	0	0	0	0	0	0	0	0	0	0	0	0	0	0	0	0	0	0	0	0	0	0	0	0	0	0	0	0	0	0
ADGRE5	1	9	4	7	1	0	16	1	3	11	10	22	17	4	58	15	9	7	20	26	17	29	10	9	15	25	25	16	14	21	28	44	30	19	14	32	10	21	55	49	59	47	14	16	17	16	43	25	15
ADGRF1	0	0	0	0	0	0	0	0	0	0	0	0	0	0	0	0	0	0	0	0	0	0	0	0	0	0	0	0	0	0	0	0	0	0	0	0	0	0	0	0	0	0	0	0	0	0	0	0	0
ADGRF2	0	0	0	0	0	0	0	0	0	0	0	0	0	0	0	0	0	0	0	0	0	0	0	0	0	0	0	0	0	0	0	0	0	0	0	0	0	0	0	0	0	0	0	0	0	0	0	0	0
ADGRF3	0	0	0	0	0	0	0	0	0	0	0	0	0	0	0	0	0	0	1	1	0	0	0	0	0	0	0	0	0	0	1	0	0	0	1	0	5	0	0	0	1	0	0	0	0	0	0	0	0
ADGRF4	0	0	0	0	0	0	0	0	0	0	0	0	0	0	0	0	0	0	0	0	0	0	0	0	0	0	0	0	0	0	0	0	0	0	0	0	0	0	0	0	0	0	0	0	0	0	0	0	0
ADGRF5	0	0	0	0	0	0	0	0	0	0	0	0	0	0	0	0	0	0	0	0	0	0	0	0	0	0	0	0	0	0	0	0	0	0	0	0	0	0	0	0	0	0	0	0	0	0	0	0	0
ADGRG1	0	3	2	3	0	0	1	0	2	0	0	3	10	3	9	2	1	6	4	9	4	5	7	0	2	2	20	4	1	7	7	27	35	10	15	24	15	9	37	34	40	35	13	9	15	14	6	3	0
ADGRG2	0	10	9	2	6	3	4	3	0	14	12	5	9	3	13	12	9	12	20	18	10	13	8	12	20	5	10	7	6	9	5	5	10	5	7	3	14	7	8	11	4	6	27	11	5	15	26	23	15
ADGRG3	0	0	1	1	1	0	3	1	2	0	0	3	1	2	2	1	3	0	2	2	5	0	0	0	0	1	1	3	2	0	2	8	9	1	2	4	10	3	3	6	1	4	3	3	10	8	3	1	2
ADGRG5	0	0	0	0	1	0	0	0	0	0	0	0	0	0	1	1	0	0	0	1	0	0	0	1	0	0	0	3	2	0	0	5	7	1	0	0	0	6	1	1	0	7	0	0	2	0	3	1	4
ADGRG6	1	0	1	0	0	1	3	0	2	0	2	6	2	0	0	2	2	3	2	0	0	0	0	2	0	0	0	3	0	0	0	0	1	2	3	0	0	0	0	0	0	1	6	0	0	1	0	0	0
ADGRG7	1	4	1	3	11	2	4	7	9	7	3	5	4	8	17	4	1	2	6	2	2	6	0	1	2	1	18	12	3	2	0	6	0	5	0	0	0	5	3	3	13	0	7	21	4	4	1	4	0
ADGRL1	0	1	0	0	0	0	1	0	0	0	0	2	1	1	2	4	1	0	1	1	1	1	1	1	2	1	1	0	0	1	0	0	3	1	1	2	0	2	0	0	0	0	0	1	0	5	0	2	0
ADGRL2	2	15	9	2	5	6	4	15	15	7	12	13	16	10	15	22	18	31	21	15	6	7	10	8	28	15	20	12	18	6	5	8	18	13	12	10	4	17	24	14	14	22	15	15	7	4	19	1	5
ADGRL3	2	2	3	4	2	2	3	1	0	3	0	0	1	3	1	2	1	3	6	2	1	4	1	2	4	3	5	5	13	5	3	3	11	3	1	4	1	4	2	9	8	2	0	0	3	0	5	8	12
ADGRL4	0	0	0	0	0	0	0	0	0	0	0	0	0	0	0	0	0	0	0	0	0	0	0	0	0	0	0	0	0	0	0	0	0	0	0	0	0	0	0	0	0	0	0	0	0	0	0	0	0
ADGRV1	7	45	9	27	14	13	38	35	29	36	37	32	53	27	36	34	31	47	52	24	26	42	41	32	42	40	42	55	49	46	22	49	50	42	33	42	39	46	56	59	52	42	31	39	31	50	34	17	5
ADH1C	1	0	0	1	0	0	0	0	0	0	0	0	0	0	0	0	0	0	1	0	0	0	0	0	0	0	0	0	0	0	0	2	0	0	0	0	0	0	0	0	0	0	0	0	0	0	0	0	0
ADH4	2	17	2	6	12	5	13	4	6	8	0	2	0	1	0	0	1	0	0	0	2	8	6	3	0	1	0	5	5	0	0	3	0	2	1	0	0	0	2	2	0	3	9	7	4	1	8	0	7
ADH5	155	181	63	196	147	168	163	91	214	179	150	139	216	184	171	160	191	241	233	196	113	98	113	109	264	225	252	150	155	183	100	176	248	151	137	133	167	226	326	288	373	346	260	174	142	186	238	148	129
ADH6	0	0	0	0	0	0	0	0	0	0	0	0	0	0	0	0	0	0	0	0	0	0	0	0	0	0	0	0	0	0	0	0	0	0	0	0	0	0	0	0	0	0	0	0	0	0	0	0	0
ADH7	0	0	0	0	0	0	0	0	0	0	0	0	0	0	0	0	0	0	0	0	0	0	0	0	0	0	0	0	0	0	0	0	0	0	0	0	0	0	0	0	0	0	0	0	0	0	0	0	0
ADHFE1	14	38	30	47	54	45	32	25	41	57	20	21	17	15	22	24	22	26	32	44	14	11	23	19	13	9	25	22	24	14	3	4	12	5	8	11	7	9	15	14	12	8	23	14	12	11	18	11	6
ADI1	1	5	3	5	4	5	59	22	21	23	24	41	52	38	37	38	29	43	41	40	29	31	36	16	82	50	81	51	54	83	13	22	30	22	11	29	42	41	25	41	49	50	30	36	32	46	0	1	0
ADIG	0	0	0	0	0	0	0	0	0	0	0	0	0	0	0	0	0	0	0	0	0	0	0	0	0	0	0	0	0	0	0	0	0	0	0	0	0	0	0	0	0	0	0	0	0	0	0	0	0
ADIPOQ	0	0	0	0	0	0	0	0	0	0	0	0	0	0	0	0	0	0	0	0	0	0	0	0	0	0	0	2	0	0	0	0	0	0	0	0	0	0	0	0	0	0	0	0	0	0	0	0	0
ADIPOR1	45	58	28	22	11	6	54	24	64	54	151	232	222	288	323	255	237	181	247	255	244	259	299	119	285	199	227	190	134	217	305	500	465	315	266	409	428	450	829	756	679	811	397	439	397	606	198	120	184
ADIPOR2	17	69	47	44	24	20	107	31	144	128	256	337	364	309	418	373	356	290	383	313	295	318	313	212	423	329	369	347	280	314	188	332	407	325	239	284	245	402	515	551	555	620	271	427	389	540	82	50	127
ADIRF	0	1	2	5	0	4	6	3	2	1	3	4	6	0	7	2	5	2	1	2	2	3	3	0	2	8	6	1	3	4	2	3	0	3	0	1	1	4	5	7	6	2	3	3	3	0	1	4	3
ADK	34	83	42	83	72	59	70	70	74	81	63	59	77	46	77	77	77	70	102	45	36	59	48	38	88	39	90	38	116	98	37	52	68	51	49	47	39	66	76	93	80	80	104	82	34	79	79	28	53
ADM	1	42	10	28	11	3	26	12	32	20	61	77	168	140	71	47	70	64	89	51	70	52	48	43	177	192	181	139	49	86	36	84	97	87	83	83	92	81	102	88	80	95	91	67	74	97	151	105	58
ADM2	0	0	0	0	0	0	0	0	0	0	0	0	0	0	0	0	0	0	0	0	0	0	0	0	0	0	0	0	0	0	0	0	0	0	0	0	0	0	0	0	0	0	0	0	0	0	0	0	0
ADM5	0	0	0	0	0	0	1	0	0	0	0	0	1	0	0	0	2	1	1	1	1	0	0	0	2	3	0	2	1	3	1	0	0	0	1	0	1	0	1	0	4	3	1	0	4	1	2	0	1
ADNCR	0	0	0.92	0	4	0	0.63	0	0	1.9	0	0	0	0	0	0	0	0	0.57	0	0	0	0	0	0	0	0	0	0	0	0	0	0	0	0.96	0	0	0.97	0	0	0	0	0	0	0	0	0	0	0
ADNP	0	33	5	1	5	17	6	0	7	5	20	5	5	5	18	13	14	9	23	2	4	5	6	3	5	1	4	7	11	22	9	4	1	1	7	6	19	3	18	6	11	9	0	12	0	4	8	5	2
ADNP2	14	19	17	53	37	34	25	23	47	27	35	28	25	19	49	35	31	35	26	15	7	12	12	13	30	19	39	21	9	8	12	30	51	27	26	26	34	30	24	65	26	34	34	26	30	39	27	16	8
ADO	12	36	41	29	25	36	40	46	40	54	41	31	26	25	50	21	21	36	23	32	11	16	7	36	22	26	7	31	33	31	15	4	18	12	15	23	17	16	20	21	18	19	23	27	8	11	42	17	17
ADORA1	0	1	0	0	0	1	1	0	4	1	2	2	5	0	5	9	4	2	2	4	5	8	7	2	4	0	2	6	0	0	8	1	1	6	3	12	6	4	6	7	10	14	8	1	6	7	2	3	2
ADORA2A	0	0	0	0	0	0	0	0	0	0	0	0	0	0	0	0	0	0	0	1	0	0	0	0	0	0	0	0	0	1	0	0	0	0	0	0	0	0	0	0	1	0	0	0	0	0	0	0	0
ADORA2B	15	26	15	7	8	6	46	22	34	23	61	77	56	50	66	49	56	30	47	70	54	51	97	48	65	34	66	90	74	92	38	60	85	73	30	32	36	64	70	66	109	112	33	59	56	109	21	29	14
ADORA3	0	0	0	0	0	0	0	0	0	0	0	0	0	0	1	0	0	0	0	0	0	0	0	0	0	0	0	0	0	0	0	0	0	0	0	0	0	0	0	0	0	0	0	0	1	0	0	0	0
ADPGK	0	3	1	0	0	3	0	1	1	1	3	0	1	5	7	6	1	3	5	1	0	7	4	0	6	9	10	0	5	2	0	7	1	10	4	2	7	5	7	2	6	3	0	7	4	9	1	0	0
ADPRH	0	0	0	0	0	0	0	0	0	0	1	0	0	0	0	0	0	0	0	0	0	0	0	0	0	0	1	0	1	0	1	1	0	0	1	3	0	0	0	0	0	0	0	0	0	0	1	0	0
ADPRHL1	0	0	0	0	0	0	0	0	0	0	0	0	0	0	0	0	0	0	0	0	0	0	0	0	0	0	0	0	0	0	0	0	0	0	0	0	0	0	0	0	0	0	0	0	0	0	0	0	0
ADPRHL2	0	0	0	0	0	0	3	0	0	0	0	0	0	0	0	0	0	0	1	0	2	0	2	0	0	0	0	4	1	0	0	0	0	0	0	0	0	0	1	0	0	1	0	0	0	0	0	0	0
ADPRM	8	7	6	11	12	7	6	7	9	12	9	16	7	11	15	16	17	10	20	8	8	5	1	12	16	18	17	4	13	20	13	11	13	10	6	6	4	5	19	8	18	20	15	1	3	8	4	13	10
ADRA1A	0	0	0	0	0	0	0	0	0	0	0	0	0	0	2	0	1	0	0	0	0	0	0	0	0	0	0	0	0	0	0	0	0	0	2	0	0	0	0	0	0	0	0	0	0	1	0	0	0
ADRA1B	0	0	0	0	0	0	0	0	0	0	0	0	0	0	0	0	0	0	0	0	0	0	0	0	0	0	0	0	0	0	0	0	0	0	0	0	0	0	0	0	0	0	0	0	0	0	0	0	0
ADRA1D	0	5	3	0	0	1	0	0	0	2	4	5	2	5	2	4	3	0	3	0	0	0	8	1	6	2	4	12	0	0	0	0	3	0	1	2	0	0	1	1	5	4	5	1	1	3	7	3	2
ADRA2A	0	0	0	0	0	0	0	0	0	0	0	0	0	0	0	0	0	0	0	0	0	1	0	0	0	0	3	0	0	0	0	0	0	0	0	0	0	0	0	0	0	0	0	0	0	0	0	0	0
ADRA2B	0	0	0	0	0	0	0	0	0	0	0	1	0	0	0	0	0	0	0	0	0	0	0	0	0	0	0	0	0	0	0	0	0	0	0	0	0	0	0	0	0	0	0	0	0	0	0	0	0
ADRA2C	0	0	0	0	0	0	0	0	0	1	0	1	0	0	0	0	0	0	0	0	0	0	0	0	0	0	0	0	0	0	0	0	0	0	1	0	0	0	0	0	0	0	1	0	0	0	0	0	0
ADRB1	0	0	0	0	0	0	0	0	0	0	0	0	0	0	0	0	0	0	0	0	0	0	0	0	0	0	0	0	0	0	0	0	0	0	0	0	0	0	0	0	0	0	0	0	0	0	0	0	0
ADRB2	0	0	0	0	0	0	0	0	0	0	0	0	0	0	0	0	0	0	0	0	0	0	0	0	0	0	0	0	0	0	0	0	0	0	0	0	0	0	0	0	0	0	0	0	0	0	0	0	0
ADRB3	0	0	0	0	0	0	0	0	0	0	0	0	0	0	0	0	0	0	0	0	0	0	0	0	0	0	0	0	0	0	0	0	0	0	0	0	0	0	0	0	0	0	0	0	0	0	0	0	0
ADRM1	2	21	20	17	3	8	30	9	33	25	52	60	91	100	111	93	78	125	87	92	56	62	60	67	117	68	76	81	62	77	54	105	112	81	63	71	112	117	206	216	206	210	90	91	73	110	76	54	67
ADSL	17	72	26	34	21	32	72	35	85	76	93	139	154	129	122	90	112	109	145	104	54	47	66	54	165	132	134	113	89	123	67	109	124	68	71	94	69	104	206	251	211	222	131	91	53	161	147	82	58
ADSS	110	91	69	89	55	83	110	90	111	115	103	84	210	181	149	103	116	134	139	146	128	144	117	86	199	188	197	162	165	152	129	249	219	220	183	219	230	247	299	312	331	355	170	128	140	204	198	81	97
ADSSL1	0	0	0	0	0	0	0	0	0	0	0	0	1	0	0	0	0	0	0	0	0	0	0	0	2	0	0	0	0	0	0	0	0	0	0	0	0	1	0	0	0	0	0	0	0	0	0	0	0
ADTRP	0	0	1	0	0	1	0	0	0	3	0	0	0	0	0	0	0	0	0	0	0	2	0	0	0	0	0	0	3	4	0	0	0	0	0	0	0	0	2	3	0	0	0	0	0	0	0	0	0
AEBP1	0	0	0	0	0	0	0	0	0	0	0	0	0	0	0	0	0	0	0	0	0	0	0	0	0	0	0	0	0	0	0	0	0	0	0	0	0	0	0	0	0	0	0	0	0	0	0	0	0
AEBP2	15	46	17	26	53	46	29	38	37	42	30	36	42	21	52	42	31	49	57	31	14	28	20	37	59	50	55	27	42	33	9	40	46	29	40	51	39	32	54	36	61	67	37	12	10	34	31	10	11
AEN	0	0	0	0	1	1	0	0	1	0	3	0	1	2	3	1	3	4	6	2	3	0	2	1	1	2	0	1	0	0	3	2	5	2	1	1	3	6	12	4	3	9	6	2	5	0	1	3	0
AES	2	2	0	1	0	1	3	2	5	0	0	4	1	0	3	6	2	2	4	4	4	1	2	4	3	4	0	2	3	3	0	2	2	2	3	0	2	2	2	2	1	1	2	1	0	2	2	3	0
AFAP1	1	2	2	2	0	2	2	2	6	4	10	8	7	15	11	3	1	11	5	7	3	0	6	3	18	11	14	7	18	7	7	6	4	13	2	5	7	10	8	2	15	7	2	10	9	10	7	4	2
AFAP1L1	0	0	0	1	0	2	0	0	0	0	1	0	3	0	0	0	1	1	4	0	1	0	0	0	0	0	1	1	0	0	0	0	0	0	0	0	0	0	0	0	0	0	0	0	0	0	0	0	0
AFAP1L2	46	45	36	73	61	45	85	67	69	82	83	70	43	63	108	50	67	85	94	58	72	74	61	44	93	79	72	51	104	96	34	97	68	48	39	44	75	45	80	99	81	75	103	114	82	107	111	56	64
AFDN	49	48	40	47	31	37	68	38	64	54	61	57	40	30	75	54	72	62	63	62	39	33	41	50	34	52	84	52	80	73	14	34	43	17	16	14	13	39	30	41	43	62	48	16	18	46	37	20	43
AFF1	36	122	96	36	55	74	138	76	164	132	162	148	215	143	269	163	175	225	217	187	148	184	126	160	250	245	255	187	266	192	58	134	156	96	80	79	100	114	135	148	176	198	142	95	101	183	130	62	82
AFF2	0	1	0	0	5	1	1	0	5	7	0	0	4	2	0	1	0	0	1	0	0	0	1	0	0	0	0	1	1	0	0	0	0	0	0	0	0	0	0	0	1	0	0	1	0	8	4	0	5
AFF3	6	8	9	7	8	6	8	6	18	17	11	7	15	14	11	8	10	5	12	11	4	4	10	17	12	17	9	15	9	9	4	20	8	5	8	6	2	13	8	1	12	23	11	2	5	9	19	2	1
AFF4	3	0	3	2	3	1	5	1	3	4	0	7	4	2	6	4	5	5	14	7	3	8	4	3	3	3	0	5	1	4	2	3	0	2	0	8	7	0	3	17	4	6	4	2	2	6	5	1	2
AFG1L	4	10	3	10	4	1	8	12	11	13	14	17	12	9	14	14	10	13	19	21	6	10	9	12	4	2	11	14	11	33	3	13	21	12	11	10	6	13	11	12	9	5	21	8	5	15	4	5	17
AFG3L2	21	51	33	34	26	33	120	44	85	81	168	194	219	186	254	216	182	196	205	193	210	163	219	119	177	153	218	192	173	206	155	331	305	253	31	97	350	224	79	525	508	633	69	169	268	373	61	22	25
AFM	0	0	0	0	0	0	0	0	0	0	0	0	0	0	0	0	0	0	0	0	0	0	0	0	0	0	0	0	0	0	0	0	0	0	0	0	0	0	0	0	0	0	0	0	0	0	0	0	0
AFMID	0	0	0	0	0	0	0	1	0	0	0	0	0	0	0	0	0	0	0	0	0	0	0	0	0	0	0	0	0	0	0	0	0	0	0	0	0	0	0	0	0	0	0	0	0	0	0	0	0
AFP	0	0	0	0	0	0	0	0	0	0	0	0	0	0	0	0	0	0	0	0	0	0	0	0	0	0	0	0	0	0	0	0	0	0	0	0	0	0	0	0	0	0	0	0	0	0	0	0	0
AFTPH	20	26	25	31	20	17	37	11	29	50	67	50	59	46	81	34	48	86	73	53	27	41	34	52	66	76	97	42	95	63	52	106	71	45	90	75	103	42	85	123	102	111	53	58	61	85	76	53	23
AGA	0	2	0	1	1	0	3	0	1	1	2	1	2	3	4	1	4	4	0	5	2	0	0	1	3	0	6	5	0	0	0	4	3	1	0	4	0	2	1	0	0	3	0	0	0	3	9	3	2
AGAP1	0	1	1	1	1	1	0	0	1	3	4	1	0	0	6	2	4	0	8	11	5	3	13	4	1	1	4	1	4	4	1	8	2	6	1	3	0	1	1	5	1	8	0	0	1	4	1	1	1
AGAP2	0	0	0	0	0	1	0	0	0	0	0	2	1	0	0	0	0	0	0	0	0	0	1	0	0	2	0	1	0	0	0	0	0	0	1	0	0	0	0	0	0	1	0	0	0	0	0	0	0
AGAP3	0	0	1	0	0	0	0	2	0	0	2	3	3	4	18	6	8	13	8	9	2	4	1	5	2	1	2	5	1	2	4	8	6	5	1	6	10	11	3	13	8	13	4	3	3	6	0	0	0
AGBL1	0	0	0	0	0	0	0	0	0	0	0	0	1	0	0	0	0	0	0	0	0	0	0	0	0	0	0	0	0	0	0	0	0	0	0	0	0	0	0	0	0	0	3	1	0	0	1	0	0
AGBL2	106	136	89	110	60	110	118	87	150	112	253	253	181	278	288	198	178	137	183	173	293	232	269	142	165	140	193	145	264	260	218	362	297	203	245	343	326	264	535	419	496	545	260	469	402	389	185	179	147
AGBL3	1	0	0	0	0	1	2	0	0	0	0	1	0	0	4	0	0	0	0	0	0	0	0	0	0	0	1	1	0	0	2	1	0	0	0	0	3	0	0	0	1	0	0	0	0	0	0	0	0
AGBL4	1	2	0	3	0	0	0	0	1	2	0	2	0	0	0	3	2	0	2	7	2	3	2	0	0	7	2	1	0	1	0	3	4	3	0	2	0	0	1	2	2	5	1	1	0	0	1	0	0
AGBL5	0	1	1	1	0	1	2	1	1	1	6	9	9	10	14	6	7	4	17	16	5	2	7	2	7	4	1	12	7	17	25	11	13	17	5	18	21	7	42	28	32	28	1	14	18	21	17	9	3
AGER	0	0	0	0	0	0	0	0	0	0	0	0	0	0	0	0	0	0	0	0	0	0	0	0	0	0	0	0	0	0	0	0	0	0	0	0	0	0	0	0	0	0	0	0	0	0	0	0	0
AGFG1	17	50	38	48	27	67	56	49	71	77	39	36	63	32	62	40	60	105	80	66	34	46	24	60	61	67	88	77	58	28	13	27	42	24	42	16	24	39	33	72	68	59	61	26	24	70	91	41	25
AGFG2	1	6	0	1	2	1	4	5	4	2	9	8	14	5	10	12	4	6	6	5	9	11	12	3	11	7	10	6	6	10	27	20	32	17	19	12	28	17	18	20	19	42	19	31	31	34	13	20	11
AGGF1	6	20	21	15	16	8	32	37	28	16	79	74	49	29	64	71	44	50	73	50	57	64	41	41	61	50	67	54	79	68	21	28	37	22	1	7	35	52	6	92	42	32	21	48	45	44	13	3	4
AGK	57	187	81	94	83	62	237	125	181	228	246	337	528	530	458	495	448	523	620	551	300	403	440	285	653	502	526	491	339	363	476	905	984	697	609	831	845	981	1184	1357	1182	1367	618	623	550	784	872	515	429
AGL	0	2	0	2	4	1	11	2	8	6	6	6	1	2	8	7	4	5	2	5	5	5	1	6	11	5	3	17	5	13	5	5	4	3	5	6	8	2	9	9	11	8	6	1	6	8	5	11	2
AGMAT	71	157	85	126	73	91	202	133	184	165	148	207	265	208	178	160	163	183	187	138	119	132	130	134	195	170	318	222	255	212	98	196	242	138	169	199	160	236	381	312	372	354	333	269	187	275	231	156	129
AGMO	2	1	0	0	0	0	0	0	0	1	2	1	1	6	2	0	0	2	5	4	0	0	0	0	0	0	2	0	0	3	0	0	0	0	0	0	0	1	8	0	2	0	0	0	1	0	0	0	1
AGO1	4	16	16	14	1	8	14	3	12	14	21	20	34	30	41	28	25	34	24	12	10	28	20	18	28	34	35	24	25	24	11	7	20	16	15	15	18	20	30	32	23	35	30	24	21	52	24	14	16
AGO2	1	8	3	2	0	4	6	1	11	8	16	19	16	16	17	13	19	12	20	11	14	8	16	14	32	19	25	5	11	15	5	16	35	15	14	20	24	22	11	15	31	42	19	8	19	33	17	12	17
AGO3	0	5	3	0	2	1	9	1	8	6	8	4	7	13	8	6	6	9	1	4	13	9	4	6	4	11	3	8	4	8	3	11	3	6	5	6	12	4	8	7	22	14	2	16	6	3	3	5	6
AGO4	0	3	0	1	1	0	1	0	1	2	0	1	2	0	5	0	1	0	2	2	0	0	0	0	0	0	0	0	2	0	1	4	3	2	0	0	0	0	0	2	1	2	0	0	0	1	17	6	0
AGPAT1	1	11	3	5	2	1	6	1	7	3	31	27	12	15	53	18	14	13	16	19	20	28	16	16	15	26	29	25	16	18	18	64	46	31	33	27	48	41	53	42	52	66	27	49	43	53	27	14	19
AGPAT2	0	0	0	0	0	0	0	0	0	0	0	0	0	0	3	1	0	0	0	2	0	0	0	0	0	0	0	4	0	0	0	0	1	0	0	0	0	0	0	0	0	0	0	0	0	0	0	0	0
AGPAT3	0	2	1	6	0	2	5	4	1	8	7	9	11	4	2	2	4	5	9	13	4	2	4	2	10	15	6	5	6	14	2	3	11	8	2	0	3	3	2	2	2	14	3	3	0	7	0	0	0
AGPAT4	0	0	0	0	0	0	0	0	0	0	0	0	0	0	0	0	0	0	0	0	0	0	0	0	0	0	0	0	0	0	0	0	0	0	0	0	0	0	0	0	0	0	0	0	0	0	0	0	0
AGPAT5	5	15	7	0	5	2	6	4	5	9	8	8	22	12	10	2	10	3	13	7	3	2	10	0	3	8	11	13	12	9	1	8	13	5	13	8	8	4	10	11	11	7	20	16	4	20	6	3	1
AGPS	343	452	413	468	389	443	565	505	515	515	464	403	470	440	479	339	477	551	433	341	306	368	465	325	472	401	520	527	741	480	173	528	486	339	242	323	735	655	167	364	320	443	421	255	486	740	356	247	267
AGR2	0	1	0	0	0	0	0	1	4	0	0	0	0	1	2	0	0	1	0	2	0	0	0	0	0	0	1	1	1	0	1	4	0	2	0	1	0	0	0	1	3	0	0	0	0	0	0	0	0
AGR3	0	0	0	0	0	0	0	0	0	0	0	0	0	0	0	0	0	0	0	0	0	0	0	0	0	0	0	0	0	0	0	0	0	0	0	0	0	0	0	0	0	0	0	0	0	0	0	0	0
AGRN	0	0	0	0	0	0	0	0	0	2	0	0	0	0	0	0	0	0	0	0	0	0	1	0	0	0	0	0	0	0	0	0	0	0	0	0	0	1	0	0	0	1	0	0	0	0	0	0	0
AGRP	0	0	0	0	0	0	0	0	0	0	0	0	0	0	0	0	0	0	0	0	1	0	0	1	0	0	0	0	0	0	0	0	0	0	0	0	0	0	0	0	0	0	0	0	0	0	0	0	0
AGT	0	0	0	0	0	0	0	0	0	0	0	0	1	0	0	0	0	0	0	0	1	0	0	0	0	0	0	1	0	0	0	0	0	1	0	0	0	0	0	0	0	0	0	1	1	1	0	0	0
AGTPBP1	24	51	28	30	40	34	78	44	52	68	41	34	33	38	51	29	26	41	42	25	33	26	35	33	51	43	39	38	53	59	7	31	35	25	4	12	21	27	31	24	27	29	31	26	31	22	18	29	11
AGTR1	0	0	0	0	0	0	0	0	0	0	0	0	0	0	0	0	0	0	0	0	0	0	0	0	0	0	0	0	0	0	0	0	0	0	0	0	0	0	0	0	0	0	0	0	0	0	0	0	0
AGTR2	0	0	0	0	0	0	0	0	0	0	0	0	0	0	0	0	0	0	0	0	0	0	0	0	0	0	0	0	0	0	0	0	0	0	0	0	0	0	0	0	0	0	0	0	0	0	0	0	0
AGTRAP	0	4	5	5	0	4	7	6	8	3	11	15	19	6	10	5	2	13	10	14	3	4	4	4	19	7	7	12	14	14	7	7	6	14	4	5	8	5	12	21	7	8	3	4	6	4	16	3	4
AGXT	0	0	0	0	0	0	0	0	0	0	0	0	0	0	0	0	0	0	0	0	0	0	0	0	0	0	0	0	0	0	0	0	0	0	0	0	0	0	0	0	0	0	0	0	0	0	0	0	0
AGXT2	0	2	0	2	7	0	0	1	5	1	6	9	2	1	0	4	4	2	15	8	2	2	7	3	0	2	1	2	2	1	1	0	0	0	0	0	0	0	3	3	8	11	1	0	0	3	6	2	0
AHCTF1	65	107	89	93	73	91	101	115	131	100.94	126	90	109	67	93	69	105	117	100	77	82	79	86.82	77	78	71	142	111	139	93	34	62	28	41	50	25	61	59	51	57	80	62	164	85	70	86	45	19	36
AHCY	1	8	9	12	4	2	16	4	7	10	29	29	41	26	46	31	47	48	43	57	30	20	49	25	44	40	34	26	17	14	29	85	74	53	50	57	39	50	118	118	105	94	56	35	30	43	85	66	37
AHCYL1	9	52	24	4	7	15	43	28	22	21	30	26	30	42	33	36	9	20	29	27	19	14	33	24	51	35	28	31	50	36	13	39	41	22	27	47	53	55	65	45	61	60	35	53	20	69	40	10	18
AHCYL2	34	123	90	94	45	64	146	72	105	172	173	134	220	225	164	203	208	223	211	173	160	206	237	137	332	284	253	230	154	143	156	338	345	251	298	333	315	323	541	529	565	487	407	326	264	295	387	185	176
AHDC1	0	0	0	0	0	0	0	0	0	0	0	0	0	0	0	0	0	0	0	0	1	0	0	0	0	0	0	0	0	0	0	0	0	0	0	0	0	0	0	0	0	0	0	0	0	0	0	0	0
AHI1	31	58	40	55	59	30	106	74	94	82	84	101	130	89	75	63	75	64	87	74	48	46	45	56	99	89	128	84	146	176	29	71	68	44	45	55	39	55	72	57	69	95	78	80	61	94	65	41	37
AHNAK	0	0	0	1	0	0	0	0	0	0	0	0	3	0	0	0	0	0	0	2	0	0	0	0	0	0	0	0	0	0	0	0	0	0	0	0	0	0	2	0	1	0	0	0	1	0	1	2	0
AHNAK2	0	0	0	0	0	0	0	0	0	0	0	0	0	0	0	0	0	0	0	0	0	0	0	0	0	0	0	0	0	0	0	0	0	0	0	0	0	0	0	0	1	0	0	0	0	0	0	0	0
AHR	44	221	193	90	59	65	337	182	384	281	237	306	170	156	202	224	255	283	272	220	178	204	308	278	298	212	485	426	284	219	176	237	295	206	171	215	162	240	294	397	377	292	307	245	206	259	233	142	143
AHRR	0	0	0	0	0	0	0	0	0	0	0	0	0	0	0	0	0	0	0	0	0	0	0	0	0	0	0	0	0	0	0	0	0	0	0	0	0	0	0	0	0	0	0	0	0	0	0	0	0
AHSA1	1136	1138	668	692	1223	1049	1299	1213	1682	1364	1416	1663	1391	1183	1990	1666	805	912	1469	1332	1298	1494	1242	973	1597	1315	1624	1364	1651	1934	551	893	1110	815	749	855	874	1280	1222	1298	1332	1412	1972	1519	1187	1686	1576	811	784
AHSA2	11	12	6	19	8	5	7	8	7	14	16	16	20	14	17	32	16	16	29	17	14	14	11	6	27	22	23	26	19	28	8	18	16	19	10	33	18	29	20	21	25	20	20	16	9	5	28	20	19
AHSG	0	0	0	0	0	0	0	0	0	0	0	0	0	0	0	0	0	1	0	0	0	1	0	0	0	0	0	0	0	0	0	0	0	0	0	0	0	0	0	0	0	0	0	0	0	0	0	0	0
AHSP	0	0	0	0	0	0	0	0	0	0	0	0	0	0	0	0	0	0	0	0	0	0	0	0	0	0	0	0	0	0	0	0	0	0	0	0	0	0	0	0	0	0	0	0	0	0	0	0	0
AICDA	0	0	0	0	0	0	0	0	0	0	0	0	0	0	0	0	0	0	0	0	0	0	0	0	0	0	0	0	0	0	1	0	0	0	0	0	0	0	0	0	0	0	0	0	0	0	0	0	0
AIDA	5	15	5	9	5	2	2	9	8	12	12	15	17	10	14	22	12	10	9	14	12	7	17	9	15	11	16	15	25	21	10	18	18	11	8	14	15	17	14	17	14	18	24	22	11	18	7	14	10
AIF1	0	0	0	0	0	0	0	0	0	0	0	0	0	0	0	0	0	0	0	0	0	0	0	0	0	0	0	0	0	0	0	0	0	0	0	0	0	0	0	0	0	0	0	0	0	0	0	0	0
AIF1L	0	0	0	0	0	1	0	0	0	0	0	0	0	2	0	0	0	0	0	0	0	0	0	0	0	0	0	0	0	0	0	0	0	0	0	0	0	0	0	0	0	0	0	0	0	0	0	0	0
AIFM1	10	21	21	15	23	9	26	23	38	33	63	59	85	77	98	92	81	100	86	82	48	46	92	44	89	59	86	57	69	74	60	119	106	81	95	101	99	88	169	189	150	135	135	114	86	145	118	77	84
AIFM2	0	0	0	0	0	0	0	0	0	0	0	0	0	0	0	0	0	0	0	0	0	0	0	0	0	0	0	0	0	0	0	0	0	0	0	0	0	0	2	0	0	0	0	0	0	0	0	0	0
AIFM3	0	0	0	0	0	0	0	0	0	0	0	0	0	0	0	0	0	0	0	0	0	4	0	0	0	0	1	0	0	0	0	1	0	0	0	0	0	1	0	0	0	0	0	0	0	0	0	0	0
AIG1	0	0	2	1	0	2	0	1	0	1	0	2	1	0	0	2	3	0	6	2	0	2	1	0	0	0	1	0	2	1	0	8	0	0	0	2	0	2	1	2	1	2	1	0	0	0	1	0	0
AIM2	0	0	0	0	0	0	0	0	0	0	0	0	0	0	0	0	0	0	0	0	0	0	0	0	0	0	0	0	0	0	0	0	0	0	0	0	0	0	0	0	0	0	0	0	0	0	0	0	0
AIMP1	63	87	17	119	112	99	55	72	84	100	45	68	47	59	62	46	38	51	61	55	32	47	37	36	80	52	79	76	55	46	13	25	14	12	17	7	7	16	22	27	24	13	20	28	15	39	27	6	10
AIMP2	3	29	14	13	3	11	50	15	36	26	35	38	40	35	65	46	55	67	61	67	30	39	23	46	55	53	61	48	43	55	20	35	32	23	10	14	7	22	45	43	62	52	17	21	24	24	54	21	25
AIP	1	6	1	7	5	3	9	9	7	5	10	7	7	9	4	10	9	18	13	10	1	4	5	6	15	12	12	4	5	1	4	11	8	2	8	2	9	4	12	11	15	5	6	9	3	8	9	3	6
AIPL1	0	0	0	0	0	0	0	0	0	0	0	0	0	0	0	0	0	0	0	0	0	0	0	0	0	0	0	0	0	0	0	0	0	0	0	0	0	0	0	0	0	0	0	0	0	0	0	0	0
AIRE	0	0	0	0	0	0	0	0	0	0	0	0	0	0	0	0	0	0	0	0	0	0	0	0	0	0	0	0	0	0	0	0	0	0	0	0	0	0	0	0	0	0	0	0	0	0	0	0	0
AIRN	0	0	0	0	0	0	0	0	0	0	0	0	0	0	0	0	0	0	0	0	0	0	0	0	0	0	0	0	0	0	0	0	0	0	0	0	0	0	0	0	0	0	0	0	0	0	0	0	0
AJAP1	0	0	0	0	0	0	0	0	0	0	0	0	0	0	0	0	0	0	0	0	0	0	1	0	0	0	0	0	0	0	0	0	0	0	0	0	0	0	0	0	0	0	0	0	0	0	0	0	0
AJM1	0	0	0	0	0	0	1	0	0	0	0	1	0	0	1	0	0	0	2	0	0	0	0	0	1	0	1	2	0	0	0	0	0	1	0	1	1	0	1	0	1	0	0	0	0	0	0	0	0
AJUBA	2	4	15	11	20	11	10	20	28	24	45	41	37	40	27	21	19	20	28	21	42	44	25	14	43	28	31	17	45	59	14	41	53	30	76	73	95	58	57	67	45	37	52	82	77	76	34	31	17
AK1	0	0	0	2	0	0	1	1	0	0	0	0	0	0	0	1	0	0	1	1	0	0	1	1	0	1	0	0	3	2	0	2	2	2	0	0	2	0	1	1	2	0	0	1	1	2	2	0	0
AK2	42	133	78	62	36	72	163	90	135	118	322	377	420	449	465	399	289	349	401	360	356	375	370	204	429	341	413	352	369	444	304	452	502	434	373	371	443	544	853	818	796	899	558	602	473	595	543	322	263
AK3	3	13	18	14	21	8	25	18	38	22	31	32	33	15	17	30	23	29	43	15	16	26	22	25	41	54	67	42	33	46	21	50	41	29	34	29	29	20	42	52	67	41	31	41	24	27	36	13	16
AK4	92	197	102	112	85	118	183	107	197	157	403	416	469	461	587	496	379	483	470	483	467	454	394	300	563	482	402	383	430	477	353	525	621	439	429	483	497	567	756	876	912	864	596	626	461	690	650	411	347
AK5	0	0	0	0	0	0	0	0	0	0	0	0	0	0	0	0	0	0	0	0	0	0	0	0	0	0	0	0	0	0	0	0	0	0	0	0	0	0	0	0	0	0	0	0	0	0	0	0	0
AK6	16	17	6	34	31	36	32	19	21	27	3	4	23	13	12	6	11	14	11	12	6	7	9	15	20	17	24	7	22	14	1	6	13	11	14	7	5	12	13	10	9	4	9	4	1	7	7	11	0
AK7	0	0	0	0	0	1	0	0	0	0	0	0	0	0	0	0	0	1	0	0	0	0	0	0	0	0	3	0	0	0	0	0	0	1	0	0	0	0	0	0	0	0	0	0	0	0	4	1	0
AK8	0	0	0	0	0	0	1	0	1	0	0	2	0	0	0	0	0	2	0	0	0	1	3	0	0	0	1	0	0	0	2	0	1	0	0	1	0	2	1	2	2	2	0	0	0	0	0	0	0
AK9	0	0	0	0	0	3	0	0	0	0	1	2	0	2	1	0	1	3	6	1	2	0	3	1	2	2	2	0	4	1	0	3	0	2	1	0	3	0	0	0	1	2	1	0	3	5	6	3	8
AKAIN1	8	18	17	4	11	5	36	21	36	20	12	8	34	25	14	22	18	14	25	17	22	20	16	16	70	34	17	21	46	37	14	28	28	14	17	25	22	22	7	17	23	30	26	16	14	15	38	7	10
AKAP1	6	25	13	9	5	23	27	18	11	26	32	24	36	20	52	29	33	44	31	27	18	14	29	17	37	26	21	18	24	24	29	34	52	33	46	34	40	42	62	65	59	67	53	34	34	33	43	33	18
AKAP10	11	31	11	26	13	18	31	17	36	31	72	113	83	70	72	44	87	83	106	62	58	49	78	49	74	97	89	64	69	59	49	93	76	69	89	110	129	117	138	131	92	160	70	76	80	81	56	58	33
AKAP11	253	791	433	418	429	372	713	503	781	691	686	728	883	562	526	541	677	714	817	660	388	421	378	488	700	727	956	605	1023	780	131	210	284	188	302	288	185	327	381	413	396	336	672	430	368	430	536	347	342
AKAP12	12	77	22	27	9	20	52	32	29	36	60	86	96	44	73	28	26	36	78	65	25	24	19	21	97	50	34	26	103	59	22	43	25	12	5	14	5	12	25	38	41	10	105	79	57	81	61	30	27
AKAP13	1	12	7	5	5	0	16	13	20	7	18	16	27	21	50	28	36	19	20	12	20	15	23	19	31	22	40	26	18	24	12	12	19	12	14	14	20	14	49	39	37	46	12	21	40	40	8	10	4
AKAP14	0	0	0	0	0	0	0	0	0	0	0	0	0	0	0	0	0	0	0	0	0	0	0	0	0	0	0	0	0	0	0	0	0	0	0	0	0	0	0	0	0	0	0	0	0	0	0	0	0
AKAP17A	87	68	74	89	105	67	99	68	86	127	88	104	94	76	124	97	93	70	110	106	58	53	103	99	82	114	106	130	143	137	23	36	39	46	41	44	47	113	37	45	55	56	66	53	12	78	64	37	48
AKAP2	1	4	3	1	0	2	18	0	1	6	2	0	9	3	6	4	0	6	4	4	7	3	7	3	17	7	5	1	9	8	3	6	9	8	1	5	7	4	6	4	15	8	3	5	13	13	2	4	5
AKAP3	0	0	0	0	0	0	0	0	0	0	0	0	0	0	0	0	0	0	0	0	0	0	0	0	0	0	0	1	0	0	0	0	0	0	0	0	0	0	0	0	0	0	0	0	0	0	0	0	0
AKAP4	0	0	2	0	5	0	0	0	15	0	0	0	4	1	0	0	0	0	0	0	0	2	0	0	7	2	0	0	2	14	3	0	4	5	0	3	2	2	34	16	35	26	0	0	0	0	0	4	5
AKAP5	0	4	1	1	0	1	0	0	0	0	0	0	0	0	1	4	0	1	0	0	0	1	0	0	2	0	0	0	0	2	1	8	1	0	0	0	0	3	2	2	1	3	0	0	0	0	0	0	0
AKAP6	8	34	18	12	9	15	48	25	21	30	63	55	57	41	34	43	68	64	57	62	35	45	41	44	29	40	24	26	51	45	28	60	60	38	29	35	15	38	76	68	78	91	34	61	24	15	52	42	17
AKAP7	16	14	15	17	18	9	10	18	7	37	15	21	16	15	13	14	6	21	18	11	10	9	17	10	17	17	26	19	22	20	10	15	9	8	10	6	12	28	24	18	9	18	12	4	16	13	20	5	16
AKAP8	17	27	12	14	19	18	31	32	45	30	59	64	62	71	82	64	47	56	54	38	50	73	56	50	74	49	52	32	39	41	36	97	71	48	52	90	95	63	105	112	128	90	76	75	74	76	95	45	67
AKAP8L	5	19	9	16	8	16	38	7	8	12	55	61	50	34	43	44	39	56	52	60	38	43	69	39	45	52	57	54	43	63	15	48	45	49	22	28	35	53	64	74	62	63	62	55	52	55	40	34	22
AKAP9	224	356	220	226	120	149	445	264	410	362	392	401	551	304	429	386	312	449	466	368	295	380	202	303	364	413	544	354	696	563	82	179	118	113	97	91	96	118	190	222	260	172	437	263	185	321	116	116	154
AKIP1	388	170	95	229	360	238	186	246	365	240	287	376	228	209	268	229	190	215	265	194	127	138	199	146	324	274	420	323	361	353	79	141	184	129	77	85	90	122	279	292	317	306	296	186	142	251	287	164	143
AKIRIN1	9	32	21	10	18	25	32	26	36	17	23	13	22	23	58	23	49	37	26	31	53	28	35	20	54	40	54	36	13	28	40	70	69	50	90	101	53	119	140	135	127	109	44	65	49	74	16	16	41
AKIRIN2	1496	978	733	1677	1783	1839	1061	1061	1234	1370	1033	1046	1592	1394	1110	860	984	954	1115	1040	928	1065	915	628	1580	1367	1190	1136	1519	1522	593	1246	1343	1012	366	485	1037	1241	554	1301	1315	1628	887	752	1039	1743	827	540	470
AKNA	0	0	0	0	0	0	0	0	0	0	0	0	0	0	0	0	0	0	0	0	0	0	0	0	0	0	0	1	0	0	0	2	0	0	0	0	0	0	0	0	0	0	0	0	0	0	0	0	0
AKNAD1	2	9	1	4	3	1	1	0	2	1	0	2	0	0	1	1	1	7	1	3	5	5	7	2	0	2	8	5	0	2	0	0	8	2	1	0	1	0	0	0	5	1	1	2	0	1	1	0	0
AKR1A1	3	45	25	25	12	12	26	15	72	67	87	71	41	51	93	86	77	94	106	112	68	66	61	42	77	53	85	65	37	62	32	36	78	27	26	19	26	30	63	69	83	90	89	67	46	52	22	10	23
AKR1B1	204	793	541	563	485	503	836	603	894	1011	973	1205	1958	1694	1612	1548	1128	1176	1730	1585	996	1123	1641	1244	1833	1600	2248	1889	1121	1321	673	1067	1602	1023	656	835	730	1084	2002	2129	2191	2028	1590	1086	807	1351	2170	1235	1136
AKR1B10	0	0	0	0	0	0	0	0	0	0	0	0	0	0	0	0	0	0	0	0	0	0	0	0	0	0	0	0	0	0	0	0	0	0	0	0	0	0	0	0	0	0	0	0	0	0	0	0	0
AKR1C3	0	0	0	0	0	0	0	0	0	0	0	0	0	0	0	0	0	0	0	0	0	0	0	0	0	0	0	0	0	0	0	0	0	0	0	0	0	0	0	0	0	0	0	0	0	0	0	0	0
AKR1C4	0	0	0	0	0	0	0	0	0	0	0	0	0	0	0	0	0	0	0	0	0	0	0	0	0	0	0	0	0	0	0	0	0	0	0	0	0	0	0	0	0	0	0	0	0	0	0	0	0
AKR1D1	0	0	0	0	0	0	0	0	0	0	0	0	0	0	0	0	0	0	0	0	0	0	0	0	0	0	0	0	0	0	0	0	0	0	0	0	0	0	0	0	0	0	0	0	0	0	0	0	0
AKR7A2	0	0	4	2	1	1	12	3	11	3	24	45	32	34	25	24	10	8	26	24	7	7	18	11	17	29	21	21	18	30	10	35	37	38	0	5	17	19	1	35	42	62	6	8	14	44	3	0	2
AKT1	6	22	17	4	0	1	31	10	28	13	56	63	18	28	72	33	38	36	38	55	23	30	43	41	25	41	44	53	33	41	19	22	32	22	14	11	13	25	36	18	37	32	82	23	25	55	29	20	16
AKT1S1	1	8	7	6	0	9	23	14	14	16	13	37	27	23	41	34	20	22	46	33	15	19	22	23	45	30	32	35	19	38	7	19	39	33	19	21	26	59	44	39	42	87	17	20	18	32	9	23	11
AKT2	0	0	1	0	0	0	0	0	0	0	1	0	0	0	1	1	0	0	1	0	0	1	0	0	1	0	3	3	0	0	0	0	0	0	3	2	0	6	0	3	0	0	0	0	0	0	0	0	1
AKT3	25	76	47	55	37	33	92	62	87	101	88	90	68	82	103	112	77	85	84	129	31	58	67	68	85	60	112	103	153	72	22	57	66	51	89	72	46	84	60	72	39	58	105	100	72	101	90	39	42
AKTIP	178	281	155	333	273	192	271	250	361	301	332	383	388	327	394	350	324	377	432	373	222	279	295	208	486	352	490	431	342	382	227	309	362	310	390	407	384	543	680	734	715	763	583	531	420	627	540	325	279
ALAD	2	13	7	27	15	13	22	21	43	32	20	34	57	57	76	48	60	70	81	70	52	52	30	45	61	53	62	60	28	47	25	33	53	39	33	39	30	49	57	67	49	64	25	21	18	32	47	28	26
ALAS1	4	68	39	13	12	13	68	24	60	37	91	94	121	77	115	160	136	102	174	141	116	127	124	83	214	190	122	69	70	85	54	172	165	105	99	117	134	161	222	247	184	162	141	152	78	163	87	77	71
ALAS2	0	0	0	0	0	0	0	0	0	0	0	0	0	0	0	0	0	0	0	0	0	0	0	0	0	0	0	0	0	0	0	0	0	0	0	0	0	0	0	0	0	0	0	0	0	0	0	0	0
ALB	2	2	0	0	0	1	5	1	0	4	0	0	0	0	0	0	0	0	0	0	0	0	0	0	0	0	0	0	0	0	0	0	0	0	0	0	0	0	2	0	0	0	0	0	0	0	0	0	0
ALCAM	0	0	2	2	1	0	4	13	6	3	1	1	7	16	0	4	2	5	2	1	0	0	2	3	1	4	8	2	4	3	3	3	9	4	0	2	7	0	9	13	3	4	5	2	5	8	2	1	1
ALDH16A1	0	0	1	1	0	0	0	0	0	1	1	0	0	0	0	0	0	0	0	4	0	0	2	0	0	0	1	0	0	1	0	1	5	1	0	3	0	0	2	1	0	2	0	1	0	0	0	1	0
ALDH18A1	27	25	22	27	21	26	14	29	23	20	21	18	42	34	43	33	33	18	21	28	23	49	36	22	19	25	22	29	37	38	14	27	20	9	9	20	13	16	37	22	20	27	32	43	51	42	32	42	27
ALDH1A1	7	63	10	36	11	51	79	3	30	36	8	2	13	28	1	0	23	15	14	32	0	0	12	25	17	14	151	85	33	32	49	56	81	52	28	44	42	74	30	36	21	20	52	48	58	42	75	15	45
ALDH1A2	3	15	14	26	6	14	40	13	44	39	17	7	31	48	12	13	18	36	42	39	16	14	19	13	30	30	27	20	24	30	43	98	103	50	58	35	64	77	137	144	119	157	37	31	16	22	17	7	5
ALDH1A3	0	0	0	0	0	0	2	0	0	0	0	1	0	1	0	0	0	0	0	0	0	1	0	1	0	1	1	0	0	0	0	3	0	0	0	2	0	2	2	0	0	0	0	0	0	0	2	0	0
ALDH1B1	0	4	4	11	1	6	2	3	2	4	0	2	5	9	12	3	5	10	12	9	13	4	5	15	2	8	11	7	2	4	6	39	23	17	17	8	24	35	17	23	18	28	13	7	10	11	31	8	9
ALDH1L1	0	0	0	0	0	0	0	0	0	0	0	0	0	0	0	0	0	0	0	0	0	0	0	0	0	0	0	0	0	0	0	0	0	0	0	0	0	0	0	0	0	0	0	0	0	0	0	0	0
ALDH1L2	5	12	5	11	5	8	9	7	3	1	2	5	19	8	22	4	14	14	12	16	9	6	6	7	7	7	19	21	22	17	4	3	19	19	15	12	8	11	28	22	30	21	17	29	6	23	6	10	7
ALDH2	2	2	5	2	2	6	4	2	4	10	12	18	22	14	26	33	13	15	19	21	20	22	25	16	15	26	12	15	9	10	35	48	39	13	20	21	36	44	44	89	71	69	23	37	23	23	6	3	7
ALDH3A1	0	0	0	0	0	0	0	0	0	0	0	0	4	0	0	0	0	0	0	0	0	0	0	0	0	0	0	0	0	0	0	0	0	0	0	0	0	0	0	0	0	0	0	0	0	0	0	0	0
ALDH3A2	1	10	8	5	0	2	9	6	16	10	28	24	52	25	41	16	17	20	28	27	30	17	16	22	34	37	30	30	25	42	28	20	34	32	32	50	32	43	46	63	51	41	42	37	65	59	36	23	21
ALDH3B1	0	0	0	0	1	0	0	1	0	0	0	0	0	0	0	1	0	0	0	1	0	0	0	1	0	0	0	0	0	0	0	0	1	0	2	3	0	0	0	1	0	0	0	0	0	0	0	0	0
ALDH4A1	0	3	4	2	0	0	4	0	1	3	9	15	10	8	33	12	11	4	13	14	22	18	16	7	16	4	14	4	6	7	25	44	24	19	15	43	15	28	46	49	39	42	27	41	30	35	18	18	12
ALDH5A1	8	11	3	6	4	16	7	5	7	5	9	12	22	10	15	20	15	14	17	5	11	7	11	12	7	7	24	8	12	13	5	7	13	15	10	4	17	10	3	4	5	8	8	9	6	7	17	6	8
ALDH6A1	0	3	5	9	1	4	17	3	5	15	7	4	7	11	22	9	10	10	7	3	7	18	30	9	19	15	4	9	9	16	7	9	15	16	18	18	17	15	17	18	18	17	4	19	15	32	15	10	4
ALDH7A1	52	79	58	80	16	72	107	40	61	45	169	187	213	178	98	91	104	119	118	87	80	80	95	77	277	238	186	117	202	208	118	223	269	214	159	202	165	187	392	319	324	353	212	222	177	248	229	163	120
ALDH8A1	0	5	3	1	0	1	3	1	0	3	1	0	1	2	3	12	1	2	3	2	4	4	10	0	8	3	6	5	3	5	2	1	9	3	9	2	2	7	7	1	6	6	12	1	5	16	3	0	1
ALDH9A1	2	15	6	0	0	7	3	0	5	4	14	21	12	14	5	25	5	15	15	23	8	7	22	14	14	11	20	11	22	16	2	21	12	14	7	12	3	6	20	19	17	24	18	9	10	1	24	28	5
ALDOA	2	20	21	11	2	8	29	14	18	27	76	74	86	101	102	98	90	126	82	97	47	52	78	54	78	73	69	68	45	49	68	160	211	116	93	76	59	126	243	278	292	229	97	52	51	83	210	153	88
ALDOB	0	3	0	0	0	1	2	0	0	0	0	1	0	0	0	7	0	0	0	1	0	1	0	0	0	1	0	0	1	0	0	0	1	0	1	0	0	3	0	1	0	0	1	0	0	0	0	0	0
ALDOC	1	15	17	12	0	1	16	12	9	16	50	69	37	33	49	24	27	54	36	35	19	18	21	32	21	42	43	43	30	34	9	28	24	27	22	37	35	21	57	51	41	32	50	16	26	35	20	11	13
ALG1	0	2	0	1	0	0	1	1	2	2	0	0	7	1	2	2	1	6	4	1	3	3	2	3	1	2	0	3	5	2	0	2	4	0	3	3	3	11	3	10	7	2	5	2	1	3	4	4	2
ALG10	0	0	0	4	1	0	0	3	1	6	2	0	3	3	8	4	0	1	5	8	0	0	5	7	0	0	1	2	2	5	3	9	6	13	0	0	0	4	4	6	4	6	6	0	0	0	0	0	0
ALG11	8	112	44	82	78	115	105	77	150	159	44	64	105	67	95	84	118	118	121	77	57	84	70	69	104	131	125	80	92	89	55	53	101	59	58	46	76	78	184	144	113	131	105	72	51	78	115	66	48
ALG12	0	0	0	0	0	1	2	0	1	0	0	1	1	1	2	2	1	4	1	4	2	1	0	0	0	1	1	1	0	0	1	0	0	2	1	2	3	2	7	0	2	4	4	3	0	0	0	1	0
ALG13	144	525	364	320	324	344	647	428	578	578	616	637	750	630	494	515	467	595	658	568	434	469	498	425	687	586	848	584	880	790	366	576	698	470	437	407	440	511	740	869	728	896	781	708	635	772	666	338	367
ALG14	40	129	55	123	127	100	106	96	118	163	50	50	155	114	89	132	124	134	149	125	52	83	45	70	168	172	141	107	108	124	62	109	175	114	104	100	113	113	182	197	238	195	123	91	54	128	129	51	68
ALG2	0	5	4	3	2	4	4	5	9	4	6	5	4	7	8	14	6	15	16	8	6	5	15	8	12	8	5	11	15	10	7	10	9	5	1	6	5	5	21	20	22	13	11	13	0	3	10	4	3
ALG3	0	4	0	9	0	6	8	2	1	6	10	13	6	10	7	13	3	5	9	8	5	11	4	4	18	8	4	5	7	9	4	3	7	15	11	9	6	5	13	17	16	9	21	4	1	8	6	2	3
ALG5	8	10	1	3	6	10	6	6	3	2	4	3	8	1	9	6	2	2	8	2	2	3	0	2	1	12	7	7	10	9	0	5	3	3	1	3	2	7	3	8	4	3	1	5	2	8	4	3	5
ALG6	278	371	288	404	338	464	638	460	480	513	307	271	453	402	316	438	426	523	679	505	290	394	462	369	454	469	605	469	441	442	296	437	507	346	390	383	373	473	627	578	644	479	570	377	298	452	589	367	412
ALG8	5	33	13	45	35	30	43	27	64	94	45	50	60	50	40	43	67	64	60	57	26	43	44	35	84	62	77	76	52	44	32	43	71	38	36	48	40	54	63	79	70	78	70	77	23	53	41	33	37
ALG9	11	21	6	6	11	5	12	7	22	15	17	17	23	26	44	38	18	36	22	20	39	24	31	23	30	39	35	27	24	30	14	24	30	22	18	23	26	32	22	21	26	28	19	22	7	22	6	9	8
ALK	0	0	3	0	0	0	0	0	0	0	0	0	4	0	0	1	0	0	0	2	0	0	0	0	1	2	1	1	0	0	0	3	0	2	0	0	0	1	0	0	0	1	0	1	0	2	0	1	1
ALKAL1	2	0	0	0	0	0	1	0	1	0	0	0	2	0	0	0	0	0	0	0	0	0	0	0	0	0	2	0	1	0	0	0	3	0	0	0	2	0	0	0	0	0	0	1	0	1	1	0	0
ALKAL2	0	0	0	0	0	0	0	0	0	0	0	0	0	0	0	0	0	0	0	0	0	0	0	0	0	0	0	0	0	0	0	0	0	0	0	0	0	0	0	0	0	0	0	0	0	0	0	0	0
ALKBH1	22	38	10	20	15	21	36	22	44	36	37	44	69	69	90	50	55	65	44	70	89	73	94	42	90	93	48	70	64	62	58	119	151	91	78	102	125	111	184	165	123	143	149	115	169	153	105	80	59
ALKBH2	3	32	10	15	3	12	31	9	34	26	30	58	42	37	78	88	61	66	98	68	59	46	52	48	63	41	59	49	61	24	47	67	66	65	48	69	62	68	100	117	106	110	98	96	59	83	76	41	36
ALKBH3	9	33	9	23	14	21	31	11	44	25	26	51	47	60	46	50	42	38	64	62	33	24	54	43	81	74	70	56	36	58	39	58	91	66	62	57	48	67	125	128	146	138	98	64	39	63	115	68	51
ALKBH4	0	1	0	0	0	0	0	0	0	0	1	0	0	1	0	2	0	0	0	0	0	0	1	0	3	2	1	0	1	1	0	1	1	0	1	1	0	0	0	0	0	1	1	0	1	0	0	1	1
ALKBH5	9	113	86	32	28	35	133	35	112	80	125	138	166	138	409	165	172	168	240	206	98	107	113	104	152	164	183	120	141	137	81	108	156	127	172	118	143	345	170	185	196	230	199	150	77	229	200	70	94
ALKBH6	0	0	3	1	2	6	7	5	16	11	8	23	12	9	12	18	14	14	15	21	7	5	10	12	12	15	18	17	12	20	3	10	10	5	0	1	8	5	1	5	17	17	0	10	3	9	0	1	0
ALKBH7	29	61	25	43	27	33	54	54	56	43	68	99	102	69	107	75	53	57	82	65	42	58	44	45	112	83	114	101	130	197	13	31	26	28	33	25	20	38	44	67	67	49	93	62	68	79	63	37	34
ALKBH8	16	15	10	14	6	3	20	8	12	18	7	10	15	10	9	6	17	31	34	19	4	15	22	19	14	20	30	26	37	10	2	5	5	9	9	12	12	11	18	10	7	13	26	22	19	16	13	11	14
ALLC	33	39	11	13	19	8	28	16	18	23	41	41	35	32	16	11	20	17	50	50	22	43	55	34	55	45	45	35	57	70	5	13	18	7	2	7	12	8	28	27	35	40	36	24	16	39	30	21	20
ALMS1	50	195	123	93	49	84	234	108	231	144	191	223	236	149	234	180	222	265	253	218	121	205	137	139	271	196	291	203	293	265	73	105	135	91	142	105	78	76	203	206	177	153	256	140	84	182	246	100	133
ALOX12	0	5	7	5	5	1	6	5	13	4	13	22	39	49	25	15	26	19	25	23	28	26	37	10	26	12	8	27	21	30	12	10	25	25	17	28	22	24	29	50	22	27	40	24	12	23	6	2	9
ALOX12B	0	0	3	1	0	0	1	0	0	1	0	2	0	0	3	2	0	0	0	1	0	1	1	2	0	0	3	0	1	7	0	0	1	0	1	0	0	0	0	0	1	1	5	0	1	1	5	0	3
ALOX12E	0	0	0	0	0	0	0	0	0	0	0	0	1	0	0	0	0	0	0	1	3	0	0	0	0	0	0	4	0	0	4	0	0	1	0	0	0	1	0	0	0	0	0	0	0	0	0	0	0
ALOX15	0	0	0	0	0	0	0	0	0	0	1	4	0	0	2	0	0	0	1	0	0	0	0	0	1	0	1	0	0	0	0	0	0	0	0	0	0	2	0	4	0	0	0	0	0	0	0	0	0
ALOX15B	0	0	0	0	0	0	1	0	0	1	0	4	1	7	4	4	4	4	0	7	3	3	13	3	12	9	4	4	6	13	2	17	9	7	11	4	21	5	19	19	33	27	24	26	12	33	10	12	7
ALOX5	0	0	0	0	0	0	0	0	0	0	0	0	0	0	0	0	0	0	0	0	0	0	0	0	0	0	0	0	0	0	0	0	0	0	0	0	0	3	0	0	0	0	0	0	0	0	0	0	0
ALOX5AP	0	0	1	0	0	0	0	0	0	0	0	0	0	0	0	0	0	0	0	0	0	0	0	0	0	0	0	0	0	0	0	0	0	0	0	0	0	0	0	0	0	0	0	0	0	0	0	0	0
ALOXE3	0	2	2	0	3	7	0	0	0	3	1	1	2	0	1	6	2	3	8	0	0	0	0	0	5	1	3	1	3	0	1	2	1	1	6	2	3	4	4	0	6	3	6	2	0	0	2	0	0
ALPI	0	0	0	0	0	0	0	0	0	0	0	0	0	0	0	0	0	0	0	0	0	0	0	0	0	0	0	0	0	0	0	0	0	0	0	0	0	0	0	0	0	0	0	0	0	0	0	0	0
ALPK1	0	1	0	0	0	0	0	0	0	0	0	0	0	0	0	0	0	0	0	0	0	0	0	0	0	0	0	0	0	0	0	0	0	0	0	0	0	0	0	0	0	0	0	0	0	0	0	0	0
ALPK2	0	0	0	0	0	2	0	0	0	0	0	0	0	0	1	2	0	0	0	2	0	0	0	0	0	0	0	1	0	0	0	0	0	0	0	0	0	1	0	0	0	0	0	0	0	0	0	0	0
ALPK3	1	2	2	5	2	2	6	0	1	1	6	7	5	2	2	6	1	11	5	11	4	7	11	6	8	6	3	5	4	1	5	9	8	8	4	14	12	11	11	26	13	26	3	3	6	18	4	4	4
ALPL	0	2	0	0	0	0	3	0	0	0	1	5	5	10	8	10	3	0	3	5	7	1	6	1	5	4	8	0	7	3	2	4	5	4	3	2	1	1	9	5	14	7	4	1	6	7	3	3	2
ALS2	11	32	24	16	10	13	38	20	50	26	34	47	69	48	40	27	15	33	38	42	37	29	33	22	34	29	62	49	45	66	24	60	28	37	51	49	79	35	64	63	40	60	45	61	81	69	56	25	29
ALS2CL	0	0	0	0	0	0	0	0	0	0	0	0	0	0	0	0	0	0	0	0	0	0	0	0	0	0	0	0	0	0	0	0	0	0	0	0	0	0	0	0	0	0	0	0	0	0	0	0	0
ALS2CR12	0	0	0	0	0	0	0	0	0	0	0	0	0	0	0	0	0	0	0	0	0	0	0	0	0	0	1	0	0	0	0	0	0	0	0	0	0	0	0	0	0	0	0	0	0	0	0	0	0
ALX1	35	110	95	130	64	117	148	99	121	129	155	136	275	209	204	200	297	301	308	258	157	183	151	156	310	260	300	225	164	180	157	246	345	199	240	261	213	264	342	363	372	357	306	230	208	337	281	138	158
ALX3	0	0	1	0	0	0	0	0	0	0	0	1	0	0	1	0	0	0	0	0	0	2	0	0	0	0	0	0	0	3	0	1	0	0	0	0	1	0	0	0	0	0	0	0	2	0	0	0	0
ALX4	0	0	0	0	0	0	0	0	0	0	0	0	0	0	0	0	0	0	0	0	0	0	0	0	0	0	0	0	0	0	0	0	0	0	0	0	0	0	0	0	0	0	0	1	0	0	0	0	0
ALYREF	3	8	2	7	3	7	1	4	6	8	4	1	1	1	5	7	2	6	2	17	4	1	0	2	11	19	8	4	15	5	1	1	14	5	4	0	2	30	2	3	1	2	3	0	1	11	2	6	0
AMACR	0	0	0	0	0	0	0	0	0	0	1	0	0	0	1	0	1	0	3	0	0	0	0	1	2	0	0	1	1	0	1	0	0	2	1	0	0	0	0	2	2	2	1	1	0	2	0	0	0
AMBN	0	0	0	0	0	0	0	0	0	0	0	0	1	0	0	0	0	0	0	0	0	0	0	0	0	0	0	0	0	0	0	0	0	0	0	0	0	0	0	0	0	0	1	0	0	0	0	0	0
AMBP	0	0	0	0	0	0	0	0	0	0	0	0	0	0	0	0	0	0	0	0	0	0	0	0	0	0	0	0	0	0	0	0	0	0	0	0	0	0	0	0	0	0	0	0	0	0	0	0	0
AMBRA1	2	23	19	7	4	8	41	7	36	39	90	92	78	38	42	63	68	102	90	67	42	76	60	48	72	69	108	77	105	96	68	45	55	67	46	77	77	65	122	100	97	100	77	68	38	38	65	23	25
AMD1	165	647	468	436	307	332	631	402	728	680	653	705	809	806	692	816	977	994	1054	930	573	654	710	634	1134	1019	1034	808	903	777	501	941	1023	779	869	763	720	1107	1353	1472	1501	1229	1394	1058	772	1149	1369	768	755
AMDHD1	138	43	38	138	25	113	57	32	76	60	87	101	313	389	135	103	77	77	125	106	122	136	110	69	414	362	124	84	325	403	44	73	90	85	374	394	359	437	112	142	114	106	164	152	115	179	543	265	266
AMDHD2	0	0	0	0	0	0	3	0	0	2	0	0	0	0	1	1	0	0	2	0	0	2	1	1	3	1	1	1	0	0	2	1	3	0	0	1	0	0	0	3	0	1	0	2	2	1	0	0	0
AMER1	2	10	6	1	6	2	19	9	8	14	14	25	22	19	30	17	12	16	11	11	11	8	20	9	13	11	22	19	12	14	6	22	11	9	7	16	13	18	22	21	28	23	32	14	17	15	20	7	18
AMER2	0	0	0	0	0	0	0	0	0	0	0	0	0	0	0	1	0	2	0	0	0	0	0	0	0	0	0	0	0	0	0	0	0	0	0	0	0	0	0	0	0	0	0	0	0	0	0	0	0
AMER3	0	0	0	0	0	0	0	0	0	0	0	0	0	0	0	0	0	0	0	0	0	0	0	0	0	0	0	0	0	0	0	0	0	0	0	0	0	0	0	0	0	0	0	0	0	0	0	0	0
AMFR	63	72	88	79	87	89	119	103	135	94	146	150	153	116	162	116	95	123	109	143	128	120	106	81	176	156	197	136	204	143	50	134	141	110	47	92	101	123	100	116	123	159	115	154	121	167	81	45	62
AMH	0	0	0	0	0	0	0	0	0	0	0	0	0	0	0	0	0	0	0	0	0	0	0	0	0	0	0	0	0	0	0	0	0	0	0	0	0	0	0	0	0	0	0	0	0	0	0	0	0
AMHR2	0	0	0	0	0	0	0	0	0	0	0	0	0	0	0	0	0	0	0	0	0	1	0	0	0	0	0	0	0	0	0	0	0	0	0	0	0	0	0	0	0	0	0	0	0	0	0	0	0
AMIGO1	0	25	19	1	4	6	22	15	26	21	21	39	47	23	39	44	38	18	45	42	31	32	41	13	41	24	37	23	25	22	45	56	56	39	39	81	73	53	78	109	81	165	24	35	56	34	31	21	6
AMIGO2	0	0	6	0	0	0	0	0	0	0	3	11	0	0	0	0	0	0	0	0	0	0	0	0	0	0	0	0	0	0	0	0	0	0	0	0	0	0	0	0	0	0	0	0	0	0	0	0	0
AMMECR1	0	2	0	1	0	1	2	1	0	2	2	5	8	10	7	5	2	7	2	6	3	1	1	1	5	1	4	3	1	6	6	9	2	6	11	12	17	8	2	4	18	6	1	2	1	2	9	1	0
AMMECR1L	6	9	11	7	8	7	14	5	21	7	24	14	11	15	23	26	20	18	13	19	9	16	11	6	15	12	18	11	11	7	17	39	20	11	30	16	9	21	29	47	28	42	29	23	14	33	8	9	7
AMN	0	0	0	0	0	0	0	0	0	1	0	0	0	0	0	0	0	0	0	0	0	0	0	0	0	0	1	0	1	0	0	0	0	0	0	0	0	0	0	0	0	0	0	0	0	0	0	0	0
AMN1	22	109	67	65	60	50	116	63	122	131	97	78	136	122	85	109	120	120	120	92	49	98	109	77	121	137	185	100	97	85	72	95	116	99	144	134	108	157	157	203	156	164	123	82	59	128	175	149	102
AMOT	136	138	157	150	132	118	156	139	249	217	169	143	143	89	275	157	201	215	195	213	70	90	134	148	148	146	190	161	190	180	83	112	124	120	81	84	76	99	211	214	190	235	97	120	101	125	191	102	78
AMOTL1	5	14	7	6	3	5	16	15	14	14	11	16	19	36	54	34	18	29	14	20	13	14	17	4	29	12	31	20	9	9	7	14	16	7	25	15	20	34	47	26	27	21	36	19	14	19	19	20	6
AMOTL2	2	0	0	0	4	0	0	1	2	3	0	0	0	2	0	0	0	1	1	2	0	1	0	0	0	0	0	0	0	0	3	5	3	2	2	0	1	0	0	0	2	0	1	0	0	1	0	0	0
AMPD1	0	0	0	0	0	0	0	0	0	0	0	0	0	0	0	0	0	0	0	0	0	0	0	0	0	0	0	0	0	0	0	0	0	0	0	0	0	0	0	0	0	0	0	0	0	0	0	0	0
AMPD2	3	10	6	2	3	3	7	7	13	9	25	13	26	17	44	17	12	1	14	23	28	31	31	20	35	29	33	26	20	21	13	66	17	15	16	25	22	24	60	47	33	28	14	45	83	71	38	31	8
AMPD3	77	122	109	120	93	99	233	157	139	158	246	321	218	197	240	151	147	137	188	189	239	222	234	125	226	163	339	291	220	153	119	227	237	187	147	184	156	147	188	229	161	178	261	346	347	317	236	160	115
AMPH	0	4	4	4	3	1	7	8	6	6	7	14	12	8	4	2	9	9	5	5	10	6	2	1	13	10	26	15	3	2	1	13	6	7	4	10	10	8	2	4	8	3	1	6	4	14	7	10	7
AMT	0	6	2	1	0	0	0	0	1	1	2	2	5	5	1	8	3	3	6	8	8	5	3	3	0	6	3	7	7	9	4	4	9	2	7	0	5	4	5	7	10	8	2	5	7	13	9	4	9
AMTN	0	0	0	0	0	0	0	0	0	0	0	0	0	0	0	0	0	0	0	0	0	0	0	0	0	0	0	0	0	0	0	0	0	0	0	0	0	0	0	0	0	0	0	0	0	0	0	0	0
AMY2B	0	0	0	0	0	3	0	0	0	0	1	0	0	0	0	0	0	0	0	0	0	0	0	0	0	0	0	0	0	0	0	0	1	0	0	0	0	0	0	0	0	0	0	0	0	0	0	0	0
AMZ1	0	0	0	0	0	0	0	0	0	0	0	0	0	0	0	0	0	0	0	0	0	0	0	0	0	0	0	0	0	0	0	0	0	0	0	0	0	0	0	0	0	0	0	0	0	0	0	0	0
AMZ2	14	43	35	36	8	33	64	31	64	38	118	134	150	129	245	209	135	132	164	150	114	84	111	105	149	120	141	121	122	141	65	144	136	113	52	75	110	140	131	212	207	227	119	109	127	155	40	22	24
ANAPC1	22	52	26	28	14	17	76	41	60	39	75	102	64	51	69	59	71	66	81	73	103	95	61	58	62	52	90	75	86	62	39	99	92	67	34	59	66	47	109	141	98	175	66	93	130	109	68	46	27
ANAPC10	398	209	111	385	339	309	214	260	300	310	112	124	205	169	167	155	127	165	179	154	91	122	96	104	235	206	233	212	177	129	73	127	151	116	109	80	97	152	161	225	192	171	206	95	69	107	159	88	96
ANAPC11	113	264	142	144	70	110	324	220	306	214	347	471	353	307	499	404	299	356	414	382	297	330	339	294	357	362	425	377	511	614	120	209	261	188	159	147	146	263	315	327	314	337	469	313	234	405	215	120	133
ANAPC13	147	140	78	222	210	254	111	165	141	137	72	78	119	88	100	97	102	163	155	131	58	59	65	84	111	104	113	115	107	104	53	61	114	68	63	60	80	105	143	148	139	141	103	78	55	96	92	54	45
ANAPC15	964	884	586	845	728	832	1112	1369	1076	812	862	1151	1080	870	975	860	659	741	1042	907	566	658	673	588	1225	1099	1117	939	1819	1814	250	439	623	436	311	307	333	505	680	616	716	759	1039	707	462	911	788	471	456
ANAPC16	49	36	26	46	57	69	54	41	31	62	40	30	80	45	66	58	62	66	69	60	25	46	40	44	81	74	69	42	33	39	42	57	104	64	52	61	59	62	133	173	146	141	104	63	44	88	93	55	42
ANAPC4	72	79	47	66	95	81	108	95	79	100	83	96	129	182	151	132	91	78	123	133	184	189	156	104	133	119	119	92	180	150	43	69	105	46	53	43	74	78	68	107	100	151	121	122	129	205	60	39	14
ANAPC5	4	24	4	6	8	6	28	9	32	31	20	49	48	48	50	33	40	35	41	29	37	37	25	10	26	32	60	42	55	50	19	20	56	32	48	35	35	35	56	71	115	77	49	33	48	59	51	12	23
ANAPC7	16	70	41	9	8	13	67	21	55	48	132	114	172	120	79	63	136	112	180	135	50	93	90	85	168	172	177	129	136	115	53	79	108	89	89	136	86	108	211	216	164	195	118	135	87	181	153	108	82
ANG	0	0	0	0	0	0	0	0	0	0	0	0	0	0	0	0	0	0	0	0	0	0	0	0	0	0	0	0	0	0	0	0	0	0	0	0	0	0	0	0	0	0	0	0	0	0	0	0	0
ANG2	0	0	0	0	0	0	0	0	0	0	0	0	0	0	0	0	0	0	0	0	0	0	0	0	0	0	0	0	0	0	0	0	0	0	0	0	0	0	0	0	0	0	0	0	0	0	0	0	0
ANGEL1	3	12	4	3	1	3	11	7	3	14	11	6	12	7	15	9	11	6	23	14	10	12	8	11	18	15	8	17	21	12	6	11	11	6	4	11	1	7	25	5	10	12	19	4	2	14	18	3	5
ANGEL2	138	248	171	148	147	172	249	176	274	284	362	363	451	414	254	213	268	407	333	269	282	263	254	170	622	420	416	289	385	397	282	504	505	385	358	456	413	438	594	683	545	561	370	351	386	446	682	323	293
ANGPT1	0	0	2	7	0	3	3	0	6	3	2	2	5	1	2	1	0	1	5	2	1	2	1	1	4	6	2	5	5	7	5	0	2	0	0	0	0	1	5	2	2	0	1	5	1	1	4	6	0
ANGPT2	0	0	0	0	0	0	0	0	0	0	0	0	0	0	0	0	0	1	0	0	0	0	0	0	0	0	0	0	0	0	0	0	0	0	0	0	0	0	0	0	0	0	0	0	0	0	0	0	0
ANGPT4	0	1	0	0	0	0	0	0	0	0	0	0	0	0	0	0	0	0	0	0	0	0	0	0	0	0	0	0	0	0	0	0	0	0	0	0	0	0	0	0	0	0	0	0	0	0	0	0	0
ANGPTL1	0	2	0	1	4	0	1	0	0	2	2	4	1	3	0	3	3	2	3	5	4	1	2	1	4	2	3	1	3	1	3	4	1	4	0	4	0	2	2	3	3	6	4	0	0	1	0	0	0
ANGPTL2	0	1	1	0	0	0	1	0	0	0	0	0	0	0	0	0	0	0	0	0	3	0	0	0	1	0	0	0	0	0	1	0	1	0	0	0	0	0	0	0	0	0	0	0	0	0	0	0	0
ANGPTL3	0	0	0	0	0	0	0	0	0	0	0	0	0	0	0	0	0	0	0	0	0	0	0	0	0	0	0	0	0	0	0	0	0	0	0	0	0	0	0	0	0	0	0	0	0	0	0	0	0
ANGPTL4	0	0	0	0	0	0	0	0	0	0	0	0	0	0	1	2	0	0	0	0	0	0	0	1	0	2	1	0	0	0	0	0	0	0	0	0	0	0	0	0	0	0	0	0	0	0	0	0	0
ANGPTL5	0	0	0	0	0	3	0	0	0	0	0	0	0	0	0	0	0	0	0	0	0	0	0	0	0	0	0	2	0	0	0	0	0	0	0	0	0	0	0	0	0	0	0	0	0	0	0	0	0
ANGPTL6	0	0	0	0	0	0	2	3	0	5	6	11	5	1	5	1	5	4	1	4	8	2	12	6	2	3	7	2	2	3	1	6	2	1	1	1	0	5	1	2	7	10	1	1	1	3	4	1	2
ANGPTL7	0	0	0	0	0	0	0	0	0	0	0	0	0	0	0	0	0	0	0	0	0	0	0	0	0	0	0	0	0	0	0	0	0	0	0	0	0	0	0	0	1	0	0	0	0	0	0	0	0
ANGPTL8	0	4	0	8	2	2	4	1	2	3	0	1	0	2	8	2	4	4	7	8	5	3	6	0	0	2	4	2	1	1	0	2	6	0	1	1	1	3	5	5	5	3	1	6	5	2	7	1	4
ANHX	0	0	0	0	0	0	0	0	0	0	0	0	0	0	0	0	0	0	0	0	0	0	0	0	0	0	0	0	0	0	0	0	0	0	0	0	0	0	0	0	0	0	0	0	0	0	0	0	0
ANK1	0	0	0	0	0	0	0	0	0	0	1	0	0	0	0	0	0	0	0	0	0	0	0	0	0	0	0	0	0	0	0	1	0	0	2	0	0	0	0	0	0	0	0	0	0	1	1	0	0
ANK2	15	48	18	26	12	17	48	41	63	64	85	105	89	73	90	65	95	128	115	106	84	60	73	77	96	89	162	63	80	100	54	99	96	64	77	96	78	78	137	139	140	114	82	77	90	82	112	50	81
ANK3	18	98	29	37	18	21	89	37	64	60	77	121	88	69	72	96	80	112	143	114	89	82	89	84	94	87	119	99	105	75	52	98	100	55	91	96	107	111	207	200	149	148	96	99	71	104	143	54	20
ANKAR	0	0	0	0	0	1	0	0	0	0	0	0	0	0	0	1	0	1	0	0	0	0	0	0	0	0	0	0	0	0	0	2	0	0	0	0	0	0	0	0	0	0	0	0	0	0	0	0	0
ANKDD1A	0	0	0	0	0	0	0	0	0	0	0	0	0	0	0	0	0	0	0	0	0	0	1	0	0	0	0	0	0	0	0	0	0	0	0	0	0	0	0	0	0	0	0	0	0	0	0	0	0
ANKDD1B	0	0	1	0	0	1	1	0	0	0	1	0	0	0	0	0	0	0	0	0	0	0	0	0	0	0	0	0	1	0	0	0	0	0	0	0	0	0	0	0	0	0	0	0	0	0	0	0	0
ANKEF1	0	0	0	0	0	1	0	0	0	0	0	0	0	0	0	0	0	0	0	0	0	0	0	0	0	1	0	1	1	0	0	0	0	0	0	0	0	0	0	0	0	1	0	0	2	0	2	0	0
ANKFY1	3	52	46	23	17	32	86	24	55	64	69	88	79	74	146	70	103	120	107	103	62	89	95	48	97	67	82	77	83	56	52	108	87	82	82	101	124	50	154	200	150	177	107	107	131	96	121	50	50
ANKH	0	1	0	1	0	0	1	2	0	2	0	0	1	1	2	0	0	2	3	2	2	1	2	5	0	0	1	0	1	1	1	0	1	3	0	1	2	0	1	2	4	3	3	2	0	3	0	4	0
ANKHD1	9	39	34	21	6	7	33	21	63	48	57	29	44	51	71	66	47	73	37	39	64	64	61	33	22	37	106	53	52	61	29	42	35	30	36	42	46	31	82	52	66	80	67	66	66	52	30	12	45
ANKIB1	37	61	64	37	46	34	48	49	77	73	90	81	79	57	68	41	94	83	101	104	54	64	63	69	114	70	132	115	103	88	17	66	68	45	31	37	45	83	38	55	34	75	99	57	49	63	91	39	26
ANKK1	0	0	0	0	0	0	0	0	0	0	0	0	0	0	0	0	0	0	0	0	0	0	0	0	0	0	0	0	0	0	0	0	0	0	0	0	0	0	0	0	0	0	0	0	0	0	0	0	0
ANKLE1	0	0	0	0	0	0	1	0	0	0	0	0	0	0	0	0	0	0	0	1	0	1	0	0	0	0	0	0	1	1	0	1	0	0	0	0	0	0	3	1	2	0	0	0	2	0	0	0	0
ANKLE2	28	33	23	32	30	28	76	37	67	32	102	133	139	106	152	149	110	121	142	130	101	137	137	128	165	139	144	133	160	137	46	123	107	92	15	85	113	83	72	167	178	152	49	76	164	135	27	20	15
ANKMY1	0	0	0	0	0	0	0	0	0	0	0	0	0	1	0	0	0	0	0	0	0	0	0	0	0	0	0	0	0	0	0	1	0	0	0	0	0	0	0	0	0	0	0	0	0	0	0	0	0
ANKMY2	9	30	18	16	17	18	31	22	22	48	44	32	53	69	49	51	68	69	80	116	42	40	37	59	54	54	51	35	42	44	64	79	117	79	60	62	57	99	135	165	160	125	88	90	70	73	78	62	47
ANKRA2	37	20	15	18	22	10	52	36	44	42	65	66	74	66	71	60	73	64	87	53	58	62	68	38	88	88	127	104	63	80	44	62	95	89	69	63	57	79	104	123	130	136	88	92	79	92	115	82	48
ANKRD1	3	0	0	1	0	3	2	2	1	3	0	0	0	0	0	0	0	0	0	5	0	0	0	0	2	1	3	0	2	2	0	0	4	0	2	0	0	0	3	0	0	0	2	0	0	1	0	0	3
ANKRD10	1	3	1	3	0	2	0	0	3	1	5	8	2	4	2	1	3	2	0	7	3	11	5	1	8	4	1	2	2	6	5	5	9	3	5	5	4	5	8	5	6	7	4	6	3	2	1	2	3
ANKRD11	1	16	3	6	6	5	8	6	18	10	45	21	36	39	63	37	38	22	24	51	26	41	27	26	40	87	36	45	55	25	10	22	32	20	22	17	14	71	45	42	42	37	29	17	17	61	45	21	16
ANKRD12	23	72	29	29	25	29	36	38	40	32	52	49	49	65	80	69	55	58	79	63	56	42	70	42	52	33	56	61	75	77	23	44	39	32	16	13	21	36	45	39	63	61	18	45	20	43	20	10	7
ANKRD13A	10	103	68	56	44	29	109	51	85	100	142	155	225	202	219	161	140	146	194	181	89	133	148	113	205	175	205	135	185	162	167	302	381	214	220	243	258	334	412	377	313	436	244	263	171	311	247	175	138
ANKRD13B	0	0	0	1	0	0	2	0	0	0	1	3	0	2	1	1	3	1	1	0	1	0	1	1	0	1	5	3	1	2	5	1	0	1	0	1	0	0	1	6	2	2	0	0	1	1	0	0	0
ANKRD13C	0	1	1	1	0	0	3	0	3	1	2	5	6	10	6	4	10	7	9	9	4	3	8	8	10	4	2	11	1	7	7	13	9	11	5	9	7	14	31	16	16	26	13	10	10	14	13	4	5
ANKRD13D	1	1	2	4	0	1	4	2	3	1	4	2	2	4	5	1	3	1	4	3	10	5	4	1	5	3	4	1	4	2	3	2	0	1	1	3	2	3	0	7	6	7	3	0	1	6	3	2	3
ANKRD16	4	42	7	21	9	12	19	13	38	42	35	34	30	14	13	21	10	16	65	34	18	5	22	23	42	45	19	24	29	48	4	12	10	23	4	9	8	12	24	36	32	51	34	27	17	45	24	7	7
ANKRD17	256	1311	764	547	378	528	1679	669	1532	1630	2171	2306	2583	2035	2363	1976	2248	2687	2622	2313	1726	1892	2099	1686	2628	2141	2720	1945	2214	1880	1642	2925	2462	1862	1949	2321	2142	1927	3752	3811	3281	3370	2859	2575	2471	2695	3143	1728	1567
ANKRD2	0	2	0	0	0	0	0	0	0	0	0	0	0	0	0	0	0	0	0	0	0	0	0	0	0	0	0	0	0	0	0	0	0	0	0	0	0	0	0	0	0	0	0	0	0	0	0	0	0
ANKRD22	0	0	0	0	0	0	0	0	0	0	0	0	0	0	0	0	0	0	0	0	0	0	0	0	0	0	0	0	0	0	0	0	0	0	0	0	0	0	0	0	0	0	0	0	0	0	0	0	0
ANKRD23	0	0	0	0	0	0	0	0	0	0	0	0	0	0	0	0	0	0	0	0	0	0	0	0	0	0	0	1	0	0	0	2	0	0	0	0	0	0	0	0	0	0	0	0	0	0	0	0	0
ANKRD24	0	0	0	0	0	0	0	0	0	0	0	0	0	0	0	0	0	0	0	0	0	0	0	0	0	0	0	0	0	0	0	0	0	0	0	0	0	2	0	0	0	1	0	0	0	0	0	0	0
ANKRD26	1	9	2	12	2	1	12	1	6	8	30	35	8	3	18	22	19	22	18	22	20	6	29	13	18	4	20	14	5	15	6	0	15	21	8	11	1	10	11	2	0	7	7	12	16	26	11	3	11
ANKRD27	4	6	1	0	14	9	7	4	12	7	12	8	7	18	8	15	9	16	16	8	3	7	16	6	16	11	16	25	14	3	5	10	15	9	6	7	6	11	26	24	15	33	4	31	11	22	18	3	3
ANKRD28	48	83	44	32	80	73	79	59	107	122	56	55	79	49	84	49	94	70	78	52	48	44	34	49	78	86	116	84	121	110	22	39	72	47	35	21	26	56	45	53	48	76	98	45	41	99	66	46	51
ANKRD29	0	0	0	0	0	0	3	4	0	0	0	0	0	0	0	0	0	0	0	0	0	0	0	0	0	0	0	1	0	0	0	1	6	0	0	0	0	0	1	0	0	3	3	0	0	0	1	0	0
ANKRD31	48	56	20	48	27	29	69	29	78	52	67	63	97	63	109	77	64	62	83	80	50	102	75	61	90	89	106	61	96	60	25	42	46	35	30	22	40	39	72	68	60	50	65	58	46	50	60	34	28
ANKRD33	0	0	0	0	0	0	0	0	0	0	0	0	0	0	0	0	0	0	0	0	0	0	0	0	0	0	0	0	0	0	0	0	0	0	0	0	0	0	0	0	0	0	0	0	0	0	0	0	0
ANKRD33B	0	0	0	0	0	0	0	0	0	0	0	0	0	0	0	0	0	0	2	0	0	0	0	0	0	0	0	0	0	0	0	0	0	0	0	0	0	0	0	0	0	3	0	0	0	0	0	0	0
ANKRD34A	0	1	0	0	2	0	2	1	1	1	2	2	0	0	3	5	5	4	2	4	0	3	1	1	0	1	5	7	2	1	1	0	0	1	9	2	9	1	2	2	5	3	2	5	6	13	1	3	2
ANKRD34B	0	0	0	0	0	0	0	0	0	0	4	0	4	1	2	3	2	0	0	0	0	2	0	2	0	1	1	0	0	1	1	3	4	0	0	2	0	0	0	0	0	0	0	0	3	0	2	0	1
ANKRD34C	0	0	0	0	0	0	0	0	0	0	0	0	0	0	0	0	0	0	0	0	0	0	0	0	0	0	0	0	0	0	0	0	0	0	0	0	0	0	0	0	0	0	0	0	0	0	0	0	0
ANKRD35	1	4	0	0	0	2	2	0	1	2	0	2	2	0	8	1	0	2	0	3	1	0	3	1	1	2	0	1	0	0	0	1	3	3	1	1	0	2	2	5	1	0	3	2	1	5	2	1	0
ANKRD37	0	1	1	3	0	0	0	0	0	1	0	1	3	0	1	2	2	1	4	0	1	0	0	0	1	0	1	0	0	0	0	0	1	2	1	1	0	0	0	1	0	0	1	0	0	0	0	1	0
ANKRD39	1	5	6	1	4	0	16	6	13	8	39	54	41	42	65	38	55	51	26	25	39	44	43	26	48	26	30	36	37	50	12	25	41	30	8	22	42	29	22	30	22	39	40	39	33	57	10	10	14
ANKRD40	11	21	20	7	6	10	28	17	43	26	40	48	31	42	45	22	45	27	36	30	31	36	43	19	46	34	33	41	65	35	29	76	73	53	15	37	73	57	21	72	78	60	45	62	108	88	24	21	14
ANKRD42	19	11	8	15	12	9	12	6	11	27	11	17	21	31	40	22	15	17	26	33	20	17	37	16	19	18	28	16	10	18	23	30	20	21	24	37	40	23	50	35	53	42	23	41	30	42	50	30	26
ANKRD44	23	98	77	58	89	67	146	66	178	116	102	104	142	141	124	109	111	119	206	134	64	113	127	98	209	147	202	184	226	134	95	152	176	91	102	105	101	154	180	195	259	180	100	76	54	143	217	154	98
ANKRD45	1	16	3	7	2	13	8	9	7	8	3	0	12	7	9	8	11	12	10	10	6	8	6	7	11	20	4	7	10	36	2	1	4	0	9	2	9	11	3	8	2	0	5	3	0	12	29	3	3
ANKRD46	139	247	131	164	105	90	198	117	288	290	290	354	416	412	351	375	304	367	372	364	370	364	352	214	460	448	434	292	303	326	306	507	595	498	408	324	347	474	738	750	591	703	438	498	258	465	604	294	292
ANKRD49	80	223	63	208	137	137	139	164	113	184	94	120	113	95	147	136	191	226	195	116	63	107	102	109	175	158	192	140	108	89	80	113	156	110	87	68	70	116	137	184	185	180	111	72	85	60	94	50	71
ANKRD50	0	0	0	0	0	0	0	0	0	0	0	0	0	0	0	0	0	0	0	0	0	0	0	0	0	1	0	0	0	1	0	0	0	0	0	0	0	0	0	0	0	0	0	0	0	0	0	0	0
ANKRD52	0	0	1	0	1	0	2	0	1	1	9	7	6	9	3	15	5	13	13	8	10	17	8	2	14	4	7	7	3	4	8	11	14	8	4	4	4	7	10	14	18	34	0	7	11	11	13	4	2
ANKRD53	0	1	1	1	0	0	0	0	0	0	0	0	0	0	1	0	2	0	0	0	0	0	0	0	0	0	0	0	0	0	0	0	0	0	0	0	0	0	2	0	3	5	2	1	0	2	0	0	1
ANKRD54	0	2	2	3	0	0	6	1	6	1	13	13	5	12	11	9	6	7	6	5	6	7	8	5	7	3	4	9	0	2	3	7	14	14	0	6	21	20	1	8	13	30	5	12	5	17	0	0	0
ANKRD55	0	0	0	0	0	0	0	0	0	0	0	0	0	0	0	2	0	0	0	2	0	0	0	2	0	0	0	0	0	0	0	0	1	0	0	0	0	0	0	0	0	0	0	1	0	0	0	0	0
ANKRD6	38	21	23	35	15	12	20	17	32	45	24	35	26	25	24	25	27	28	26	27	16	15	19	12	42	19	45	16	35	27	32	43	37	22	28	28	41	41	66	58	69	89	71	62	95	90	63	26	25
ANKRD60	0	0	0	0	0	0	0	0	0	0	0	0	0	0	0	0	0	0	0	0	0	0	0	0	0	0	0	0	0	0	0	0	0	0	0	0	0	0	0	0	0	0	0	0	0	0	0	0	0
ANKRD61	0	0	0	0	0	0	0	0	0	0	0	0	0	0	0	0	1	0	0	0	0	0	0	0	0	0	0	0	0	0	0	0	0	0	0	0	1	0	0	0	0	0	0	0	0	0	0	0	0
ANKRD63	0	1	0	0	1	0	3	0	2	0	0	0	0	3	0	0	0	0	0	0	0	0	0	2	0	0	0	0	0	0	0	0	1	1	0	0	0	0	0	0	0	0	0	1	0	0	2	2	0
ANKRD65	0	0	0	0	0	0	0	0	0	0	0	0	0	0	0	0	0	0	0	0	0	0	0	0	0	0	0	0	0	0	0	0	0	1	0	0	0	0	0	0	0	0	0	0	0	0	0	0	0
ANKRD66	0	0	0	0	0	0	0	0	0	0	0	0	0	0	0	0	0	0	0	0	0	0	0	0	0	0	0	0	0	0	0	0	0	0	0	0	0	0	0	0	0	0	0	0	0	0	0	0	0
ANKRD9	0	0	0	0	0	0	0	0	0	0	0	0	0	1	2	3	2	2	4	7	1	2	0	0	1	1	1	0	0	1	0	0	0	1	0	0	0	2	1	0	0	2	2	1	0	0	0	0	0
ANKS1A	0	9	0	2	2	0	9	4	5	2	21	24	16	15	34	23	16	24	22	15	14	19	23	13	12	22	18	9	16	17	26	37	28	23	15	21	31	36	30	51	70	49	16	24	25	39	11	1	10
ANKS1B	54	55	14	26	11	27	23	24	34	36	127	131	77	48	28	48	84	91	53	52	7	12	31	27	87	78	18	28	84	104	49	94	161	81	107	118	114	162	54	65	69	90	35	25	32	44	35	31	36
ANKS3	0	1	2	0	0	0	1	0	2	1	0	0	1	4	3	3	2	5	2	15	3	4	0	3	9	5	7	9	5	5	1	1	10	5	0	0	1	14	1	3	4	8	2	3	0	13	3	1	0
ANKS4B	0	3	2	9	7	2	6	3	23	11	6	10	6	3	1	5	9	9	8	10	5	5	10	2	19	9	8	19	22	17	5	9	4	9	7	8	5	11	11	15	12	8	3	4	1	7	25	0	5
ANKS6	0	3	1	0	0	0	7	1	4	3	6	9	5	2	1	6	9	2	0	3	4	1	0	3	2	0	4	2	0	6	4	16	6	9	1	2	2	2	3	5	6	3	5	2	1	3	1	1	5
ANKUB1	0	0	0	0	0	0	0	0	0	0	0	0	0	1	0	0	0	0	0	0	0	0	0	0	0	0	0	0	0	0	0	0	0	0	0	0	0	0	0	0	0	0	0	0	0	0	0	0	0
ANKZF1	1	11	6	4	1	1	10	1	12	9	12	27	30	22	32	25	24	26	13	9	22	32	21	11	29	32	29	22	18	28	8	32	20	17	9	18	25	23	45	48	59	30	30	9	26	32	39	11	17
ANLN	166	205	178	203	170	149	261	214	339	296	323	305	459	340	273	258	274	329	388	381	301	325	280	198	406	320	410	368	365	334	177	353	340	252	274	459	288	279	419	530	388	509	392	401	426	402	463	346	261
ANO1	0	1	0	0	0	0	0	0	0	0	0	0	0	0	1	0	0	0	0	0	0	0	0	1	0	0	0	0	0	0	0	0	0	0	0	0	0	0	0	0	0	0	0	0	0	0	0	0	0
ANO10	8	39	11	28	13	24	31	24	23	20	35	36	65	52	70	51	99	48	68	88	41	50	52	63	46	38	41	60	38	38	30	70	76	65	34	43	61	55	133	142	129	76	89	57	68	75	75	50	45
ANO2	2	2	0	1	1	0	1	0	0	2	0	4	3	0	5	2	3	0	9	1	2	0	0	0	0	0	1	2	4	1	2	2	1	0	0	0	1	1	2	4	1	9	2	5	1	0	3	3	0
ANO3	0	3	6	1	0	0	4	3	0	3	0	0	2	3	4	5	1	2	7	6	2	0	0	1	4	10	6	4	3	0	3	3	4	0	7	2	1	8	1	10	12	4	1	4	0	1	5	3	15
ANO4	43	145	55	63	35	63	127	73	100	65	139	177	206	164	174	150	146	188	222	192	99	110	125	149	289	282	219	204	246	209	76	149	133	122	98	116	104	191	175	210	143	179	179	133	121	161	202	129	109
ANO5	3	9	8	4	8	4	4	4	12	13	12	0	18	14	12	17	15	16	9	12	9	8	2	5	34	19	25	7	23	14	7	14	28	12	7	14	19	17	23	18	24	20	5	23	3	33	27	25	26
ANO6	18	81	54	40	7	38	62	31	23	22	90	88	37	50	68	75	58	85	89	68	63	85	58	42	43	58	116	56	33	25	44	81	84	72	35	48	38	42	104	129	146	90	86	124	101	77	83	64	24
ANO7	0	0	0	0	0	0	0	0	0	0	0	0	0	0	0	0	0	0	0	0	0	0	0	0	0	0	0	0	0	0	0	0	0	0	0	0	0	0	0	0	0	0	0	0	0	0	0	0	0
ANO8	0	0	0	0	0	0	0	0	0	0	0	0	0	0	0	0	0	0	0	0	0	0	0	0	0	0	0	0	0	0	0	0	0	0	0	0	0	0	0	0	0	0	0	0	0	0	0	0	0
ANO9	1	2	1	3	0	0	2	1	0	0	0	0	9	3	7	9	6	3	3	3	0	1	2	1	5	2	4	1	2	13	4	1	3	3	3	1	5	1	3	4	7	8	1	0	6	8	8	5	0
ANOS1	0	0	0	0	0	0	0	0	0	0	0	0	0	0	0	0	0	0	0	0	0	0	0	0	0	0	0	0	0	0	0	0	0	0	0	0	0	0	0	0	0	0	0	0	0	0	0	0	0
ANP32A	6	10	9	13	17	1	4	7	7	10	20	26	24	8	31	23	28	18	19	35	14	20	20	16	20	23	22	11	13	21	5	4	14	6	10	12	5	19	23	24	16	19	40	12	15	18	24	13	12
ANP32B	105	175	76	89	77	81	168	117	144	149	314	371	350	305	524	469	254	301	321	315	273	311	279	215	342	275	251	244	504	582	153	202	221	178	227	244	222	337	349	311	334	364	316	307	207	393	283	164	147
ANP32E	247	303	151	208	279	203	303	199	367	288	365	442	494	432	446	372	333	381	382	395	345	372	361	244	638	559	466	342	491	481	236	372	533	316	373	391	332	444	822	707	707	775	581	414	371	504	513	273	244
ANPEP	0	0	0	0	0	2	1	0	0	0	0	0	0	0	1	0	0	0	0	0	0	0	0	0	0	0	0	0	0	0	0	0	0	0	0	0	1	0	0	1	0	1	0	0	0	0	2	0	0
ANTXR1	0	1	0	0	0	0	0	0	0	0	0	0	0	0	0	0	0	0	0	0	0	0	0	0	0	0	0	0	0	0	0	0	0	0	0	0	0	0	0	0	0	0	0	0	0	0	0	0	0
ANTXR2	0	4	1	5	0	1	3	5	11	13	1	1	7	5	27	9	2	4	7	8	8	4	11	9	1	2	15	14	31	43	18	29	12	25	13	16	9	11	23	45	19	33	9	6	7	3	16	8	12
ANTXRL	0	0	0	0	0	0	0	0	0	0	0	0	0	0	0	0	0	0	0	0	0	0	0	0	0	0	0	0	0	0	0	0	0	0	0	0	0	0	0	0	0	0	0	0	0	0	0	0	0
ANXA1	0	0	0	0	0	0	0	0	0	0	0	0	0	0	0	0	0	0	0	0	0	0	0	0	0	0	0	0	0	0	0	0	0	0	0	0	0	0	0	0	0	0	0	0	0	0	0	0	0
ANXA10	0	0	0	0	0	0	0	0	0	0	0	0	0	0	2	1	0	1	0	0	0	0	1	0	0	0	0	0	0	1	0	0	0	0	0	0	0	0	0	0	0	0	1	0	0	0	0	0	0
ANXA11	1	5	4	1	2	6	7	2	7	11	8	16	16	13	23	10	19	14	38	16	12	17	12	12	11	14	14	10	14	6	50	48	62	54	49	50	56	40	76	93	90	90	13	31	44	47	48	27	16
ANXA13	0	0	0	0	0	0	0	0	0	0	0	0	0	0	0	0	0	0	0	0	0	0	0	0	0	0	0	0	0	0	0	0	0	0	0	0	0	0	0	0	0	0	0	0	0	0	0	0	0
ANXA2	6	27	9	10	73	18	11	19	39	58	28	34	37	29	99	90	51	67	53	40	38	42	45	31	34	40	37	35	26	29	4	7	21	11	28	31	27	38	36	39	35	32	66	41	28	58	11	20	19
ANXA3	11	3	4	11	17	7	4	7	5	13	17	8	31	14	15	14	16	10	10	11	5	14	8	2	27	13	19	20	14	19	4	5	7	7	4	2	0	0	12	6	10	8	11	6	0	2	22	11	11
ANXA4	15	3	3	0	8	8	4	6	2	23	15	15	26	13	6	16	14	4	11	23	13	6	17	6	20	10	11	12	17	13	10	3	15	7	18	4	5	19	17	5	18	16	35	12	21	12	75	22	23
ANXA5	6	58	53	83	12	57	63	44	76	48	73	92	91	118	125	110	105	134	120	114	79	84	106	73	102	63	87	80	88	122	32	82	73	78	33	54	96	127	68	107	102	108	136	122	143	221	47	43	38
ANXA6	0	0	1	3	0	1	2	0	0	1	0	1	0	1	0	5	1	0	5	0	1	2	13	4	1	7	1	0	0	5	2	2	3	4	2	0	3	3	3	21	4	1	9	2	10	10	5	0	4
ANXA7	53	53	48	65	54	33	95	34	115	91	156	172	128	122	89	65	82	74	110	63	70	69	70	66	161	119	119	99	143	139	84	163	156	115	139	198	158	167	208	221	168	203	110	138	145	150	153	60	90
ANXA8L1	0	0	0	0	0	0	0	0	0	0	0	0	0	0	0	0	0	0	0	0	0	0	0	0	0	0	0	0	0	0	0	0	0	0	0	0	0	0	0	0	0	0	0	0	0	0	0	0	0
ANXA9	0	0	0	0	0	0	0	1	0	0	0	0	0	0	0	0	1	0	0	0	0	0	0	0	0	0	0	0	0	0	0	0	0	0	0	0	0	0	0	1	0	0	5	0	1	3	0	0	0
AOAH	0	0	0	1	0	0	3	3	2	0	0	0	4	0	0	1	2	1	1	0	1	0	2	1	0	1	1	0	0	0	0	0	3	0	0	0	0	0	0	2	2	0	1	0	0	0	1	0	0
AOC1	0	0	0	0	0	0	0	0	0	0	0	0	0	0	0	0	0	0	0	0	0	0	0	0	0	0	0	0	0	0	0	0	0	0	0	0	0	0	0	0	0	0	0	0	0	0	0	0	0
AOC2	0	1	3	0	0	2	3	0	9	1	1	2	0	0	3	1	4	2	0	1	2	3	0	3	2	2	2	4	1	1	0	2	2	0	4	7	2	0	1	6	1	5	6	0	7	5	2	0	2
AOC3	0	0	0	0	0	0	0	0	0	0	0	0	0	0	0	0	0	0	0	0	0	0	0	0	0	0	0	0	0	0	0	0	0	0	0	0	0	0	0	0	0	0	0	0	0	0	0	0	0
AOX1	0	0	2	2	2	0	0	2	3	0	0	0	14	3	1	3	1	2	5	8	0	5	2	0	7	6	0	1	16	9	0	0	0	0	0	2	0	0	0	3	0	0	2	1	0	2	14	14	11
AOX2	0	0	0	0	0	0	0	0	0	1	0	3	0	0	0	0	0	0	0	0	0	0	0	1	0	0	4	0	0	1	0	1	0	0	0	0	0	0	0	0	0	0	0	1	0	0	0	0	0
AOX4	0	0	0	0	0	0	0	0	0	0	0	0	0	0	0	0	0	0	0	0	0	0	0	0	0	0	0	0	0	0	0	0	0	0	0	0	0	0	0	0	0	0	0	0	0	0	0	0	0
AP1AR	45	69	38	46	55	83	50	70	49	56	51	63	56	61	80	56	32	30	64	36	64	40	49	34	82	52	53	38	93	113	66	84	71	82	86	102	80	67	118	134	93	117	56	37	61	70	77	33	31
AP1B1	8	14	4	8	3	18	18	11	16	13	24	19	38	20	35	27	25	39	34	45	40	31	35	12	34	26	22	26	11	32	35	71	50	28	21	35	43	34	97	95	83	97	32	28	42	42	15	30	24
AP1G1	5	9	8	7	15	1	18	12	6	27	30	17	34	20	35	19	12	25	40	16	18	22	34	13	28	18	32	33	30	33	16	31	35	21	53	32	28	45	56	36	35	42	63	35	30	28	32	14	4
AP1G2	0	1	1	4	2	1	2	0	6	1	7	7	7	7	14	12	13	8	7	13	12	9	10	8	9	10	3	7	4	6	13	21	18	17	20	16	31	20	50	52	39	57	10	24	12	21	15	16	6
AP1M1	2	10	9	3	0	3	19	1	15	10	29	44	48	46	57	68	38	59	60	73	37	61	44	45	60	59	56	34	23	38	45	79	69	51	49	48	45	70	79	105	99	90	60	59	55	57	83	59	48
AP1M2	39	109	82	45	15	17	135	69	134	142	207	224	168	140	189	192	156	193	207	194	117	105	183	143	252	192	262	186	275	281	77	133	131	103	94	109	120	145	203	226	202	218	197	127	99	187	226	112	95
AP1S1	3	18	11	5	4	15	19	12	14	11	28	25	22	27	42	22	26	16	27	30	13	17	20	8	30	7	17	22	9	17	20	25	17	31	14	21	31	33	37	41	35	43	18	24	19	43	24	15	11
AP1S2	22	6	153	27	39	24	39	358	25	184	17	11	24	25	75	105	20	26	134	181	3	7	35	60	212	225	173	181	300	237	1	22	148	115	8	12	5	138	12	9	15	142	12	13	4	179	8	1	1
AP1S3	1	0	2	3	7	5	9	1	1	4	0	0	0	0	2	2	2	0	0	2	5	9	3	3	2	1	9	7	5	3	2	4	10	2	1	2	0	1	3	15	2	1	1	0	0	0	1	0	0
AP2A1	0	3	1	1	0	0	3	0	5	8	10	13	5	5	4	3	5	3	4	8	2	1	3	1	7	10	1	4	2	4	6	8	10	5	2	5	8	4	22	21	22	20	15	9	2	12	1	5	0
AP2A2	0	5	3	0	1	1	10	1	9	6	16	16	23	31	32	31	10	9	21	17	32	15	17	5	16	9	31	20	13	7	26	47	49	38	15	20	37	39	50	58	69	69	11	35	46	67	10	13	4
AP2B1	25	92	55	36	34	37	96	55	66	68	95	115	116	128	103	139	183	210	177	184	109	115	163	135	162	98	157	131	99	100	131	245	304	204	126	141	140	127	472	451	413	403	135	110	88	131	236	163	141
AP2M1	34	130	75	55	28	58	138	62	115	94	285	298	432	444	508	426	291	256	354	262	282	321	341	222	332	258	397	445	346	409	182	287	394	274	255	334	316	393	596	646	574	583	467	638	434	638	327	190	172
AP2S1	3	15	9	19	11	19	20	8	10	22	28	41	25	12	47	22	30	36	35	46	14	23	13	26	28	24	21	25	19	20	18	10	21	17	11	15	9	15	19	35	26	32	13	16	9	14	11	12	15
AP3B1	15	146	84	69	48	80	157	74	146	128	183	211	230	217	188	168	180	208	269	195	173	220	251	120	262	172	268	196	306	235	166	266	286	208	212	236	229	220	415	501	320	309	352	302	267	372	288	236	129
AP3B2	0	24	13	12	5	10	31	15	30	9	87	69	80	114	65	72	34	44	74	77	97	92	82	29	98	77	62	71	29	43	55	108	115	49	47	108	74	73	104	141	70	143	87	107	93	97	26	25	47
AP3D1	5	22	16	8	4	3	25	2	16	16	36	47	46	27	85	34	29	25	28	65	27	38	37	44	60	58	31	44	52	48	16	41	42	20	20	30	27	37	100	37	67	60	52	42	29	63	24	17	7
AP3M1	28	435	250	191	133	156	498	276	450	535	602	647	663	625	394	492	570	509	672	560	383	532	473	382	714	590	705	608	861	718	293	519	486	395	308	350	272	408	568	730	721	567	753	501	431	585	664	339	346
AP3M2	14	27	17	16	13	18	44	14	29	23	67	92	51	61	154	100	55	58	88	80	95	82	100	45	87	45	84	72	70	78	85	150	115	68	77	132	121	123	197	239	151	217	95	153	173	206	139	110	94
AP3S1	119	137	115	212	135	181	166	131	173	174	128	133	206	156	240	206	167	165	223	245	160	169	152	177	201	161	235	210	193	137	74	104	153	101	164	156	155	221	148	181	183	169	359	265	166	295	217	119	110
AP3S2	1	10	9	7	9	9	24	10	6	21	39	40	64	64	76	74	46	57	66	86	45	47	63	44	50	46	54	40	33	38	58	121	99	81	93	130	106	111	210	188	139	204	83	86	79	114	103	75	43
AP4B1	18	14	17	14	6	3	27	14	20	28	27	28	38	36	46	27	28	25	28	43	28	33	30	24	58	47	38	57	23	43	22	43	41	36	11	36	12	28	56	73	31	55	39	51	58	72	44	36	16
AP4E1	37	124	50	64	42	53	112	64	158	84	129	108	130	79	81	85	87	104	164	101	42	58	80	91	112	85	111	97	129	95	70	86	95	71	54	62	108	98	149	139	166	150	147	97	88	64	155	61	98
AP4M1	0	1	0	0	0	0	1	0	1	0	5	2	3	1	6	2	0	5	3	1	0	4	3	0	5	5	1	0	0	1	5	4	7	2	1	2	4	1	11	13	3	11	1	3	2	7	2	0	2
AP4S1	2	0	1	4	4	6	3	0	2	3	0	0	1	0	5	2	0	2	3	1	2	1	0	0	4	1	2	1	2	5	0	0	1	0	4	0	1	4	8	1	3	1	1	4	1	6	1	0	1
AP5B1	0	0	0	0	0	0	0	0	0	0	0	0	0	0	0	0	0	0	0	0	0	0	0	0	0	0	0	0	0	0	0	0	0	0	0	0	0	0	0	0	0	0	0	0	0	0	0	0	0
AP5M1	60	54	34	81	63	65	47	51	57	101	102	71	131	79	60	75	99	96	74	90	79	66	74	45	84	78	131	70	106	78	63	77	109	63	84	94	53	93	116	151	112	149	99	83	64	115	93	58	40
AP5S1	1	8	3	2	1	3	20	4	17	7	8	19	11	21	37	24	19	23	31	20	14	20	17	12	18	13	27	19	22	20	15	16	19	9	10	29	11	14	37	30	53	45	13	17	8	27	38	15	16
AP5Z1	0	0	0	0	0	0	0	0	0	0	0	0	0	0	0	0	0	7	3	0	0	0	0	0	0	0	1	0	0	0	1	2	1	1	1	0	3	0	9	1	2	1	0	0	0	0	1	0	0
APAF1	91	286	154	125	128	130	298	139	297	233	399	381	327	284	321	272	319	348	374	353	294	338	305	272	262	279	410	313	395	349	179	342	267	219	142	160	153	149	311	362	292	296	398	314	263	366	350	187	165
APBA1	3	15	11	12	6	7	18	7	16	24	35	33	26	28	48	40	44	35	43	49	13	32	31	21	52	20	25	35	40	28	7	5	59	54	15	23	25	63	44	52	36	86	26	21	28	54	22	21	25
APBA2	0	0	0	0	0	0	0	0	0	0	0	0	0	0	0	0	0	1	0	0	0	0	0	0	0	0	0	0	0	0	0	0	0	0	0	0	0	0	0	0	0	0	0	0	0	0	0	0	0
APBA3	2	2	1	3	0	0	2	1	5	6	7	12	12	15	4	13	11	6	10	11	14	17	18	4	8	11	8	8	8	2	11	17	27	14	8	16	17	12	34	42	25	38	3	13	11	16	6	8	3
APBB1	0	0	0	0	0	0	0	0	0	0	0	2	1	1	1	1	0	1	2	0	0	0	1	0	0	0	0	0	3	0	0	2	1	0	1	0	0	0	0	0	0	0	0	0	6	0	0	0	2
APBB1IP	5	1	9	2	1	1	12	7	9	13	39	30	27	11	43	33	34	17	38	30	22	6	20	17	33	42	47	43	30	39	2	9	26	10	3	6	8	11	7	19	15	30	6	10	9	44	5	0	2
APBB2	71	197	120	116	80	101	190	140	158	174	205	267	248	241	247	267	230	303	300	249	184	164	309	217	224	179	321	244	253	193	129	305	283	150	264	281	309	328	389	333	313	389	244	178	184	231	284	150	170
APBB3	0	0	0	0	0	0	0	0	1	0	0	8	0	1	0	2	0	0	0	2	2	0	1	0	0	1	0	0	0	0	0	0	0	0	0	0	0	0	2	2	0	1	1	1	2	4	0	0	0
APC	20	86	46	42	57	32	94	64	80	58	58	65	76	56	67	48	64	92	85	47	49	67	61	43	73	67	91	96	139	65	8	18	14	19	42	22	24	26	22	27	26	19	61	25	31	58	69	33	53
APC2	0	2	1	0	0	0	2	0	0	1	4	1	4	2	5	4	5	2	2	3	2	2	5	6	2	1	0	2	0	4	3	0	10	3	1	3	4	2	5	13	11	7	3	1	2	3	5	2	0
APCDD1	0	0	0	0	0	0	0	0	0	0	0	0	0	0	0	0	0	0	0	0	0	0	0	0	0	0	0	0	0	0	0	1	0	0	0	0	0	0	0	0	0	0	0	0	0	0	0	0	0
APCDD1L	0	0	0	0	0	0	0	0	0	0	0	0	1	2	0	0	0	0	1	0	1	0	0	0	0	0	1	3	0	0	0	0	0	0	0	0	0	0	0	0	5	0	1	0	0	0	0	0	0
APCS	0	0	0	0	0	0	0	0	0	0	0	0	0	0	0	0	0	0	0	0	0	0	0	0	0	0	0	0	0	0	0	0	0	0	0	0	0	0	0	0	0	0	0	0	0	0	0	0	0
APEG3	0	0	0	0	0	0	0	0	0	0	0	0	0	0	0	0	1	0	0	0	0	0	0	0	0	0	0	0	0	1	0	0	1	0	0	0	0	0	0	0	0	0	0	0	0	0	0	0	0
APEH	3	9	6	2	3	0	1	2	5	3	16	15	9	13	25	11	12	7	4	13	9	2	42	12	14	18	12	14	11	20	11	26	37	17	5	23	22	13	49	27	46	49	27	32	14	41	8	9	3
APELA	0	0	0	0	0	0	0	0	0	0	0	0	0	0	0	0	0	0	0	0	0	0	0	0	0	0	0	0	0	0	0	0	0	0	0	0	0	0	0	0	0	0	0	0	0	0	0	0	0
APEX1	8	41	19	45	28	62	47	26	32	48	21	42	48	22	56	50	63	79	67	65	36	31	32	29	71	73	31	45	28	36	18	29	48	39	20	36	32	36	104	103	107	122	43	35	27	21	66	46	38
APEX2	8	46	27	17	15	4	28	13	67	25	69	72	112	112	86	83	17	20	125	165	57	52	144	93	29	33	94	72	105	104	30	32	57	49	25	15	34	32	50	80	71	39	96	89	52	69	72	20	27
APH1A	0	3	0	2	1	0	1	3	0	3	9	1	2	1	8	0	5	1	4	3	5	2	2	2	3	4	6	3	4	3	3	5	3	1	0	2	3	3	4	5	4	6	3	2	4	5	2	0	1
APH1B	60	204	120	96	70	125	201	127	191	145	262	269	239	166	251	192	161	219	206	167	186	170	109	102	288	234	261	170	330	321	146	245	261	185	161	171	159	266	269	244	284	250	332	237	249	263	277	147	158
API5	126	288	222	202	195	249	320	219	372	334	396	470	600	570	523	445	414	422	498	348	431	455	544	346	626	459	647	457	534	441	541	867	803	744	702	859	714	765	936	1173	1081	1014	782	919	752	893	760	432	376
APIP	1081	287	241	604	538	448	504	459	536	435	258	256	446	363	311	307	252	250	431	389	301	287	228	215	444	382	419	296	555	563	168	257	374	250	152	154	161	265	404	426	409	459	529	282	234	403	329	117	128
APLF	72	207	80	140	113	88	180	146	193	188	172	216	281	236	178	241	284	267	243	228	228	269	238	187	318	291	307	241	282	257	134	176	223	154	70	61	85	104	305	224	312	290	228	151	160	182	210	115	120
APLN	0	1	0	0	0	0	0	0	0	0	0	0	0	0	0	0	0	0	0	0	0	0	0	0	0	0	0	0	6	0	0	0	3	0	3	0	0	0	0	4	3	0	0	0	0	0	0	0	0
APLNR	0	0	0	0	0	0	0	0	0	0	0	0	0	0	0	0	0	0	0	0	0	0	0	0	0	0	0	0	0	0	0	0	0	0	0	0	0	0	0	0	0	0	0	0	0	0	0	0	0
APLP1	1	5	1	1	5	3	5	2	2	0	9	8	18	14	5	10	3	4	9	3	10	9	6	3	6	14	12	7	14	16	15	30	7	9	9	18	8	5	18	12	27	21	9	12	4	18	5	7	7
APLP2	5	45	25	17	12	17	49	14	24	27	82	97	88	94	183	110	83	75	115	66	54	78	93	54	66	52	97	74	56	59	67	206	143	132	74	122	109	136	269	238	203	220	110	159	158	112	119	59	55
APMAP	1	8	0	0	3	2	3	9	7	4	16	4	8	8	2	5	2	0	0	5	0	1	6	3	14	9	7	4	12	10	4	13	7	8	6	5	4	12	11	12	10	8	11	15	9	12	3	0	3
APOA1	0	0	0	0	0	0	0	0	0	0	0	0	0	0	0	0	0	0	0	0	0	0	0	0	0	0	0	0	0	0	0	0	0	0	0	0	0	0	0	0	0	0	0	0	0	0	0	0	0
APOA2	0	0	0	0	1	0	0	0	0	0	0	0	0	0	0	1	0	0	0	0	1	1	0	1	0	1	0	0	0	0	0	0	0	0	0	0	0	0	1	0	1	0	1	0	0	1	0	0	0
APOA4	0	1	0	0	0	0	0	0	0	0	0	0	0	0	0	0	0	0	0	0	0	0	0	0	0	0	0	1	0	0	0	0	0	0	0	0	0	0	0	0	0	0	0	0	0	0	0	0	0
APOA5	0	0	0	0	0	0	0	0	0	0	0	0	0	0	0	0	0	0	0	0	0	1	0	0	0	0	0	1	0	0	0	0	0	0	0	0	0	0	0	0	0	0	0	1	0	0	0	0	0
APOB	11	10	17	15	25	9	6	8	31	27	7	2	28	12	26	26	7	8	4	5	9	21	3	6	12	7	40	26	7	19	12	45	46	19	31	26	17	16	41	55	28	46	44	32	42	20	16	12	23
APOBEC1	0	0	0	0	0	0	0	0	0	0	0	0	0	0	0	0	0	0	0	0	0	0	0	0	0	0	0	0	0	0	0	0	0	0	0	0	0	0	0	0	0	0	0	0	0	0	0	0	0
APOBEC2	5	3	1	2	0	0	4	2	1	1	2	4	1	4	9	7	4	4	7	4	4	4	2	3	2	4	3	3	1	8	0	2	10	3	6	16	8	5	3	12	2	0	8	5	14	12	3	1	4
APOBEC3H	1	0	0	2	2	3	4	0	0	1	0	0	1	0	0	0	0	0	1	4	0	1	0	0	0	0	3	10	0	1	0	0	5	1	0	0	0	0	0	0	0	0	0	0	1	1	0	0	1
APOBEC3Z1	0	0	0	0	0	0	0	0	0	0	0	0	0	0	0	0	0	0	0	0	0	0	0	0	0	0	0	0	0	0	0	0	0	0	0	0	0	0	0	0	0	0	0	0	0	0	0	0	0
APOBEC3Z2	0	0	0	0	0	0	0	0	0	0	0	0	0	0	0	0	0	1	0	0	0	0	0	0	0	0	0	0	0	0	0	0	0	0	0	0	0	0	0	0	0	0	0	0	0	0	0	0	0
APOBEC4	0	0	1	0	0	0	0	0	0	0	0	0	0	0	1	0	0	0	0	0	0	0	1	0	0	0	0	0	0	0	0	0	0	1	0	0	0	0	0	0	0	0	0	0	0	0	0	0	0
APOBR	0	0	0	0	0	0	0	0	0	0	0	0	2	0	3	0	0	1	2	0	0	0	0	0	0	0	0	0	0	0	0	0	0	0	0	0	0	0	0	0	0	0	0	0	0	2	0	0	1
APOC2	0	0	0	1	0	0	0	0	0	0	0	0	0	0	0	0	0	0	0	0	0	0	0	0	0	0	0	0	0	0	0	0	0	0	0	0	0	0	0	0	0	0	0	0	0	0	0	0	0
APOC3	0	0	0	0	0	0	0	0	0	0	0	0	0	0	0	0	0	0	0	0	0	0	0	0	0	0	0	0	0	0	0	0	0	0	0	0	0	0	0	0	0	0	0	0	0	0	0	0	0
APOC4	0	0	0	0	0	0	0	0	0	0	0	0	0	0	0	0	0	0	0	0	0	0	0	0	0	0	0	0	0	0	0	0	0	0	0	0	0	0	0	0	0	0	0	0	0	0	0	0	0
APOD	0	0	2	2	0	2	2	4	1	3	2	3	1	0	1	0	2	1	6	5	1	0	0	0	2	6	2	6	0	0	4	3	4	6	3	1	3	3	2	0	4	0	8	7	1	7	4	5	8
APOE	0	1	0	0	0	0	0	0	0	0	0	0	0	0	0	0	0	0	0	0	0	0	0	0	0	0	0	0	0	0	0	0	0	0	0	0	0	0	0	0	0	0	0	0	0	0	0	0	0
APOF	0	0	0	0	0	0	0	0	0	0	0	0	0	0	0	0	0	0	0	0	0	0	0	0	0	0	0	0	0	0	0	0	0	0	0	0	0	0	0	0	0	0	0	0	0	0	0	0	0
APOH	0	0	0	0	0	1	0	0	0	0	0	0	0	0	0	0	0	0	1	0	0	0	0	1	1	1	1	0	0	0	0	0	0	0	0	0	0	1	3	0	0	3	0	0	2	0	0	0	0
APOL3	0	0	0	0	0	0	0	0	0	0	0	0	0	0	0	0	0	0	0	0	0	2	0	0	0	0	0	0	0	0	0	0	0	0	1	0	0	0	0	0	0	0	1	0	0	3	0	0	0
APOLD1	1	0	3	1	0	0	2	0	2	1	0	8	1	0	0	0	1	4	1	2	2	0	3	0	2	0	1	1	0	1	0	10	2	3	0	1	0	8	0	6	0	4	0	5	3	1	0	0	0
APOM	0	0	1	3	0	0	0	6	0	0	0	1	0	2	0	2	1	1	0	1	0	3	0	0	1	0	5	0	0	4	0	0	1	0	0	0	2	0	0	5	0	0	0	0	0	1	1	1	1
APOO	225	206	136	387	234	353	242	226	245	262	107	100	157	150	166	161	138	172	179	151	75	78	81	113	132	163	216	157	134	113	69	112	154	109	74	92	98	124	166	226	209	227	135	153	115	128	119	75	76
APOOL	0	0	0	0	0	0	0	0	0	0	0	0	0	0	0	0	0	0	0	0	0	0	0	0	0	0	0	0	0	0	0	0	0	0	0	0	0	0	0	0	0	0	0	0	0	0	0	0	0
APOPT1	7	34	25	29	17	19	23	30	16	20	18	21	24	27	45	22	43	29	22	23	13	19	14	18	35	30	27	16	18	31	12	13	22	14	10	20	17	14	23	37	34	37	22	9	10	8	8	10	8
APP	1	4	3	6	0	0	2	4	3	0	2	1	1	2	3	0	0	3	2	1	0	0	0	0	3	5	16	14	1	1	12	9	14	5	5	6	4	15	11	15	17	12	4	6	8	0	0	0	0
APPBP2	3	36	23	19	17	10	31	26	36	35	56	60	37	50	79	55	57	62	68	50	63	39	56	59	80	54	62	63	36	29	42	105	85	81	9	67	59	84	37	129	90	147	40	56	60	78	25	15	5
APPL1	9	37	26	23	22	16	59	49	56	73	75	99	92	96	105	71	101	96	115	90	90	92	77	60	101	77	98	93	87	68	65	108	149	96	129	110	126	119	191	209	163	208	100	157	96	171	108	71	55
APPL2	12	20	21	35	53	53	70	45	58	50	94	113	128	106	108	139	101	85	65	49	90	87	167	73	116	104	113	87	130	97	108	162	170	144	121	179	155	173	149	211	146	230	77	138	110	94	47	26	31
APRT	0	0	0	0	0	0	0	1	0	1	0	0	0	0	0	2	0	0	0	0	0	0	0	0	0	0	2	0	1	1	0	0	0	2	0	0	1	0	0	0	0	1	1	0	0	0	0	1	1
APTX	1	14	6	26	6	7	12	18	23	21	7	15	29	15	24	25	33	30	28	19	22	25	24	18	35	27	21	25	16	14	14	14	26	15	20	28	21	23	42	55	48	47	26	23	16	17	24	10	8
AQP1	0	0	0	0	0	0	0	0	0	0	0	0	0	0	0	0	0	0	0	0	0	0	0	0	0	0	0	0	0	0	0	0	0	0	0	0	0	0	0	0	0	0	0	0	0	0	0	0	0
AQP10	0	0	0	0	0	0	0	0	0	0	0	0	0	0	0	1	0	0	0	0	0	0	0	0	0	0	0	0	0	0	0	0	0	0	0	0	0	0	0	0	0	0	0	0	0	0	0	0	0
AQP11	0	4	6	2	0	1	3	3	5	6	13	6	15	4	3	3	5	8	0	9	0	3	3	6	7	9	18	19	7	25	11	15	19	20	12	19	9	12	13	13	10	4	11	8	8	16	13	23	14
AQP12B	0	0	0	0	0	0	0	0	0	0	0	0	0	0	0	0	0	0	0	0	0	0	0	0	0	0	0	0	0	0	0	0	0	0	0	0	0	0	0	0	0	0	0	0	0	0	0	0	0
AQP2	0	0	0	0	0	0	0	0	0	0	0	0	0	0	0	0	0	0	0	0	0	0	0	0	0	0	0	0	0	0	0	0	0	0	0	0	0	0	0	0	0	0	0	0	0	0	0	0	0
AQP3	0	0	0	5	0	1	4	2	0	2	1	0	1	2	8	0	3	0	0	0	0	4	1	0	3	1	0	1	0	5	12	6	4	1	9	10	17	3	5	3	11	7	3	2	6	18	5	2	3
AQP4	0	0	0	0	0	0	0	0	0	0	0	0	0	0	0	0	0	0	1	0	0	0	0	0	0	0	0	0	0	0	0	1	0	0	0	0	0	0	0	0	0	0	2	0	0	0	0	0	0
AQP5	0	0	0	0	0	0	0	0	0	0	0	0	0	0	0	0	0	0	0	0	0	0	0	0	0	0	0	0	0	0	0	0	0	0	0	0	0	0	0	0	0	0	0	0	0	0	0	0	0
AQP6	0	1	1	0	0	2	0	2	2	0	2	5	5	4	11	6	2	2	4	4	4	0	8	1	2	2	7	6	2	6	2	6	6	7	6	4	7	5	5	10	9	14	4	7	5	8	6	3	4
AQP7	0	1	0	0	0	1	0	0	0	0	0	0	0	0	0	0	0	0	0	0	0	0	0	0	0	1	1	0	0	0	1	0	0	0	0	0	0	0	0	0	0	0	0	0	0	0	0	0	0
AQP8	0	1	0	0	0	0	0	0	0	0	0	0	0	0	0	0	0	0	1	0	0	0	0	1	0	0	0	0	0	0	0	0	0	0	0	0	0	0	1	0	1	0	0	0	0	0	0	0	0
AQP9	0	0	0	0	0	0	2	0	0	0	0	0	0	0	0	0	0	0	0	0	0	0	0	0	0	0	0	0	3	0	0	0	0	0	0	0	0	0	3	0	0	0	0	0	0	0	0	0	0
AQR	16	111	52	27	13	38	112	31	132	92	67	98	100	92	79	116	105	112	158	139	95	110	82	75	150	111	185	120	108	98	37	47	87	50	60	54	51	70	59	106	132	76	181	54	43	84	77	64	42
AR	0	0	0	0	0	0	0	0	0	0	0	0	0	0	0	0	0	0	0	0	0	0	0	0	0	0	0	0	0	0	0	0	0	0	0	0	0	0	0	0	0	0	0	0	0	0	0	0	0
ARAF	0	4	0	0	0	1	5	2	3	0	4	7	13	13	2	7	7	5	8	14	4	3	7	4	4	6	11	9	1	3	9	16	22	18	2	15	8	4	37	39	16	36	10	16	17	26	9	10	22
ARAP1	0	2	0	2	0	1	0	1	4	1	3	2	1	1	6	1	2	10	4	3	0	4	2	0	2	6	1	3	1	3	0	3	3	2	2	0	0	0	0	10	3	8	3	0	1	6	5	1	0
ARAP2	136	155	112	110	79	101	216	110	240	162	277	333	248	187	240	278	239	276	306	298	221	231	167	195	288	249	245	211	278	261	91	130	204	102	109	149	137	181	197	223	253	266	205	131	142	181	164	121	82
ARAP3	1	7	8	1	3	4	8	9	7	3	13	10	16	16	15	12	14	18	20	23	13	18	13	7	15	15	22	13	10	17	21	40	29	19	24	25	23	33	61	68	37	49	27	21	23	25	38	28	22
ARC	0	0	1	0	0	0	0	0	1	0	0	0	0	1	3	2	0	0	1	0	0	1	2	0	0	0	0	2	0	1	0	0	2	1	0	0	0	0	0	0	1	1	0	0	0	1	0	0	0
ARCN1	115	474	243	142	85	112	468	165	356	250	659	803	705	580	531	609	528	540	650	519	471	602	513	430	701	526	632	591	761	708	323	495	492	394	252	275	283	354	686	662	674	643	675	658	451	622	538	330	334
AREG	0	0	0	0	0	0	0	0	0	0	1	0	0	0	0	0	0	0	0	0	0	0	0	0	0	0	0	0	0	0	0	0	0	0	0	0	0	0	0	0	0	0	0	0	2	0	0	0	0
AREL1	15	28	7	15	11	16	22	13	23	34	30	26	32	31	36	35	38	30	37	21	32	23	30	25	41	25	45	43	40	31	22	38	54	28	18	33	38	48	58	84	89	81	35	49	44	50	32	7	12
ARF1	72	287	311	184	126	153	414	210	422	356	864	899	990	1000	899	688	528	482	633	648	777	780	727	431	923	726	916	838	890	1033	517	895	1022	734	689	854	895	994	1176	1251	1240	1436	1249	1453	986	1496	1235	835	676
ARF2	11	46	22	14	11	16	47	16	23	17	37	81	57	37	58	65	43	45	47	49	40	42	48	25	53	38	66	98	54	79	50	72	67	59	38	41	45	57	101	70	73	90	86	79	79	89	50	38	30
ARF3	3	35	17	8	7	5	25	16	15	30	48	59	52	71	94	80	48	67	108	58	45	57	65	48	57	49	62	51	40	55	60	105	84	76	75	96	109	85	150	139	145	146	70	82	97	82	59	47	42
ARF4	2401	2716	1565	2819	2492	2204	2941	2724	2773	2784	2581	2885	4647	3993	2723	2904	2707	3065	3095	3001	2585	2770	2601	2232	4999	4364	4710	3888	4829	4655	1458	2457	2878	2089	2106	1930	1881	2815	3403	3746	3847	3653	5013	3876	2717	4596	4679	2604	2436
ARF5	34	79	136	99	86	91	213	118	227	166	312	379	262	269	515	371	209	198	295	255	257	289	295	221	365	266	432	457	492	626	141	241	263	201	109	266	246	312	269	398	373	464	425	470	421	627	38	29	56
ARF6	57	76	60	72	65	68	68	39	90	96	67	80	76	100	203	159	67	63	128	110	38	73	103	55	141	110	169	149	176	202	34	171	247	162	52	30	90	279	73	83	138	333	70	86	42	352	64	29	30
ARFGAP1	0	7	7	0	0	4	10	1	6	4	12	20	18	32	35	37	25	30	36	27	21	14	45	20	30	24	31	33	3	13	31	27	35	32	24	46	39	35	78	89	83	85	27	26	39	28	3	8	17
ARFGAP2	0	6	5	2	4	3	12	3	9	9	14	28	25	27	23	15	28	34	21	27	34	25	31	32	20	16	26	16	14	10	40	60	31	65	21	56	35	33	99	89	69	112	30	43	47	44	33	35	38
ARFGAP3	5	8	1	4	2	3	10	4	3	1	11	11	28	13	13	8	3	3	2	10	4	4	3	3	19	5	22	8	18	7	13	24	4	5	4	3	8	1	16	24	16	26	22	10	4	28	1	4	4
ARFGEF1	36	97	35	43	27	26	92	50	79	103	93	126	142	116	126	70	122	103	113	97	60	47	45	61	81	66	172	156	141	127	25	74	72	39	56	50	35	68	74	94	99	65	95	98	35	93	96	33	35
ARFGEF2	25	51	40	18	30	29	55	23	48	44	160	120	90	103	143	83	67	86	118	113	70	53	64	58	92	80	79	97	83	82	77	102	83	67	80	38	89	56	86	107	130	136	132	84	123	103	82	79	36
ARFGEF3	2	16	30	5	3	21	41	22	40	62	83	82	84	59	82	72	106	115	115	87	48	70	82	70	82	75	130	90	84	80	45	108	111	81	14	41	73	65	31	154	169	207	35	57	93	117	29	3	8
ARFIP1	155	477	216	293	247	267	356	277	400	336	427	409	432	461	388	409	340	372	357	294	296	284	343	250	439	361	474	395	655	644	315	393	539	363	365	367	320	493	699	594	712	671	432	413	293	478	472	309	303
ARFIP2	0	10	3	3	0	0	4	4	11	3	18	23	34	25	30	27	23	11	22	21	19	25	14	12	23	24	27	43	27	37	25	18	37	36	23	21	21	33	43	49	50	46	45	31	26	41	21	22	15
ARFRP1	0	2	2	0	1	0	1	1	2	0	8	3	3	1	8	3	6	1	1	2	1	2	3	1	5	1	2	1	4	0	3	1	3	7	2	2	3	4	3	7	0	4	3	9	3	1	0	0	0
ARG1	0	0	0	0	0	0	0	0	0	0	0	0	0	0	0	0	0	0	0	0	0	0	0	0	0	0	0	0	0	0	0	0	0	0	0	0	0	0	0	0	0	0	0	0	0	0	0	0	0
ARG2	128	84	70	104	155	50	115	80	145	92	167	173	100	63	178	144	74	76	122	117	112	126	64	73	261	241	220	138	271	237	107	101	138	132	91	107	93	153	159	162	145	148	306	196	138	246	243	92	81
ARGFX	0	0	1	0	0	0	0	0	0	0	0	2	0	0	0	0	0	0	0	0	0	0	0	0	0	0	1	0	0	0	0	0	0	0	0	0	0	0	0	0	0	2	0	0	0	0	0	0	0
ARGLU1	24	42	18	19	18	15	51	34	44	35	122	143	118	97	121	116	72	94	88	98	75	122	111	56	78	87	121	123	128	163	78	132	111	109	41	76	74	89	226	146	175	228	108	132	97	145	19	48	58
ARHGAP1	0	2	2	0	1	0	2	2	2	2	1	2	3	2	2	5	3	5	6	6	2	4	1	5	2	0	1	2	2	6	4	5	4	6	3	3	6	3	8	12	4	6	2	7	1	3	3	0	1
ARHGAP10	17	29	25	16	13	17	32	23	44	47	56	60	68	59	71	74	84	68	94	83	71	72	63	57	71	72	82	50	91	100	85	90	86	76	15	62	75	60	55	149	138	138	40	80	67	103	18	12	19
ARHGAP11A	267	318	286	208	180	158	440	301	448	418	335	330	334	234	381	274	306	379	467	330	255	287	270	314	357	287	513	377	457	350	115	195	224	188	159	167	171	167	340	322	289	296	281	192	128	166	319	144	199
ARHGAP12	112	150	138	143	142	120	179	131	221	207	261	259	272	196	373	239	322	304	258	265	222	286	216	231	288	235	308	212	330	227	204	423	370	286	146	338	313	270	296	459	508	483	282	398	455	446	191	65	101
ARHGAP15	0	0	0	0	0	0	0	0	0	0	0	0	0	0	0	0	0	0	0	0	0	0	0	0	0	0	0	0	0	0	0	0	1	0	0	0	0	0	0	0	0	0	0	0	0	0	0	0	0
ARHGAP17	26	20	28	26	26	18	23	23	27	21	40	27	30	33	50	36	36	40	32	31	26	30	38	38	22	35	39	35	50	45	16	45	55	18	10	22	46	43	16	52	75	61	28	42	52	50	11	7	4
ARHGAP18	451	615	439	485	315	363	805	534	753	771	927	990	1073	891	746	712	716	768	998	737	885	900	860	625	1185	1106	1133	875	1168	1077	423	634	600	459	392	387	437	510	794	966	827	877	1016	938	784	1049	1033	575	463
ARHGAP19	5	42	24	29	20	21	64	24	55	58	75	49	65	61	63	57	72	86	75	52	46	50	63	58	80	46	70	64	44	48	47	115	69	69	41	69	89	89	137	133	133	97	83	50	54	78	83	68	34
ARHGAP20	6	6	9	0	6	0	14	9	3	6	12	16	11	5	12	13	6	9	8	7	8	12	9	6	11	13	22	18	16	18	1	4	5	12	5	6	5	14	10	13	13	17	2	2	4	7	30	13	3
ARHGAP21	1	2	13	1	4	4	17	3	3	5	20	13	20	14	28	13	15	28	20	13	7	6	8	10	6	7	19	12	20	24	6	3	14	15	5	9	5	17	17	20	25	41	1	28	4	25	17	11	4
ARHGAP22	1	4	7	2	2	2	9	9	6	12	25	19	23	27	49	30	13	22	16	41	19	27	41	22	31	22	17	23	12	14	24	37	43	30	21	41	25	58	102	88	53	74	12	21	42	38	34	27	19
ARHGAP23	0	0	0	0	0	0	0	0	0	1	0	0	0	0	0	1	0	0	0	0	0	0	0	0	0	0	0	0	0	0	0	0	0	0	0	0	0	0	0	0	0	0	0	0	0	0	0	0	0
ARHGAP24	1	9	4	6	5	8	13	2	10	5	11	21	20	17	22	19	21	38	31	36	23	27	16	17	30	29	11	1	14	14	7	13	14	31	13	19	15	26	23	33	24	39	9	22	17	11	16	14	18
ARHGAP25	13	157	51	59	18	55	119	78	97	108	353	348	334	368	477	354	227	239	322	369	266	287	326	176	378	332	377	370	234	287	355	573	669	475	427	562	550	597	1027	1168	827	933	587	630	487	682	609	409	366
ARHGAP26	3	12	7	7	3	4	18	6	15	15	25	20	22	24	43	23	24	32	48	32	12	13	29	25	46	39	27	34	22	20	15	31	70	47	17	11	43	42	48	54	60	86	17	22	16	58	28	15	1
ARHGAP27	0	1	7	6	0	0	2	3	2	0	2	6	5	3	3	2	4	1	1	7	3	1	0	5	3	4	9	2	9	5	3	13	4	6	1	7	1	5	11	6	15	12	6	2	6	2	4	7	13
ARHGAP28	0	0	1	0	0	0	1	1	0	4	0	0	7	1	0	0	2	7	4	2	0	0	0	0	0	0	0	0	3	0	0	9	0	0	0	0	0	0	0	0	0	0	0	0	0	0	0	0	0
ARHGAP29	72	155	190	99	55	85	301	173	324	234	415	489	530	463	392	450	452	537	495	432	326	378	351	379	593	530	658	529	578	567	185	469	509	364	141	191	285	467	267	477	581	745	236	229	282	588	204	97	96
ARHGAP30	0	0	0	0	0	0	0	0	0	0	0	0	0	0	0	0	0	0	0	0	0	0	0	0	0	0	0	0	0	0	0	0	0	0	0	0	0	0	0	0	0	0	0	0	0	0	0	0	0
ARHGAP31	0	0	3	5	1	2	1	2	1	1	8	4	3	2	1	5	0	5	7	5	9	1	2	10	8	2	3	7	5	4	3	11	5	12	2	0	0	1	10	6	13	6	3	6	2	10	0	5	8
ARHGAP32	10	14	11	20	14	23	24	6	14	32	43	15	21	27	18	34	22	20	27	30	14	12	13	5	17	36	28	24	31	11	19	16	22	26	20	18	19	23	46	42	36	30	19	8	10	12	10	6	7
ARHGAP33	0	0	0	0	0	0	0	0	0	0	0	0	0	0	0	0	0	0	0	0	0	0	0	0	0	0	0	0	0	0	0	1	0	0	0	0	0	0	0	0	0	0	0	0	1	6	0	0	0
ARHGAP35	8	28	25	21	7	3	41	12	57	34	80	75	57	52	70	50	67	80	54	39	36	37	29	36	67	62	76	50	101	47	44	70	96	103	33	49	60	71	89	160	160	146	58	61	83	91	76	25	22
ARHGAP36	0	0	0	0	0	0	0	0	0	0	0	0	0	0	0	0	0	0	0	0	0	0	0	0	0	0	0	0	0	0	0	0	0	0	0	0	0	0	0	0	0	0	0	0	0	0	0	0	0
ARHGAP39	1	1	1	1	5	0	1	0	0	2	2	0	4	1	5	0	2	1	1	2	0	3	0	0	3	1	3	3	1	3	0	2	7	2	3	2	1	3	3	2	7	6	1	2	0	1	0	2	0
ARHGAP4	0	0	0	0	0	0	0	0	0	1	0	0	0	0	0	0	0	0	0	4	0	1	3	0	0	0	1	0	1	0	0	0	0	0	0	0	0	0	2	3	0	1	2	0	0	0	0	0	0
ARHGAP40	0	0	0	0	0	0	0	0	0	0	0	0	0	0	0	0	0	0	0	0	0	0	0	0	0	0	0	0	0	0	0	0	0	0	0	0	0	0	0	0	0	0	0	0	0	0	0	0	0
ARHGAP42	29	80	25	30	57	35	72	51	137	67	69	54	38	36	86	63	84	64	28	39	9	21	24	37	64	88	56	40	91	55	49	83	88	57	112	84	88	84	68	71	73	62	110	78	48	75	24	31	24
ARHGAP44	3	9	1	6	3	10	8	7	4	12	7	19	7	15	12	9	10	12	18	14	8	14	13	9	12	14	24	10	16	24	9	12	12	5	7	5	6	17	10	15	10	22	14	18	12	16	20	4	12
ARHGAP45	0	0	0	0	0	0	0	0	0	0	0	0	0	0	0	0	0	0	0	0	0	0	0	0	0	0	0	0	0	0	0	0	1	0	0	0	1	0	0	0	0	0	0	0	0	0	0	0	0
ARHGAP5	149	318	214	157	140	167	352	218	309	308	315	373	372	293	425	400	322	426	399	269	214	224	253	251	361	340	479	356	408	378	135	220	307	195	191	166	170	296	287	377	391	417	331	269	204	353	204	172	123
ARHGAP6	0	0	0	0	0	0	0	0	0	0	0	0	0	0	0	0	0	1	0	0	0	0	0	0	0	0	0	0	0	0	0	0	0	0	0	0	0	0	0	0	0	0	0	0	0	0	0	0	0
ARHGAP8	0	2	2	0	0	2	2	0	1	1	5	5	4	1	5	4	3	2	7	3	7	2	2	1	4	4	2	7	5	7	0	3	4	4	3	4	7	0	7	5	4	6	3	3	7	3	4	2	3
ARHGAP9	0	0	0	0	0	0	0	0	0	0	0	0	0	0	0	0	0	0	0	0	0	0	0	0	0	0	0	0	0	0	0	0	0	0	0	0	0	0	0	0	0	0	0	0	0	0	0	0	1
ARHGDIA	1	5	8	5	0	9	14	4	12	7	2	17	12	9	22	19	16	20	32	30	15	7	11	5	9	13	8	14	7	11	14	15	27	18	7	9	8	13	32	39	31	25	13	11	14	35	16	8	9
ARHGDIB	0	0	0	0	0	0	0	0	0	0	0	0	0	0	0	0	0	0	0	0	0	0	0	0	0	0	1	0	0	0	1	0	0	0	0	0	0	0	0	0	0	0	0	0	0	0	0	0	0
ARHGDIG	0	1	0	1	0	1	1	0	0	2	0	0	0	1	2	1	2	2	2	1	1	0	1	0	0	0	1	3	0	0	0	2	1	1	0	0	3	0	1	0	2	0	0	2	0	0	0	1	0
ARHGEF1	0	2	1	0	0	0	0	2	2	2	4	6	2	5	7	9	4	6	7	7	10	16	10	2	9	12	6	6	5	11	9	8	4	6	0	16	9	12	22	24	29	12	9	18	18	24	5	9	2
ARHGEF10	1	5	1	0	0	1	6	1	0	2	3	20	0	1	5	2	10	11	3	6	16	12	5	0	18	13	19	17	5	4	2	4	2	5	6	21	30	30	4	0	0	3	7	19	22	20	3	2	4
ARHGEF10L	0	2	0	1	0	0	1	0	0	0	0	1	0	0	7	3	0	0	1	0	0	0	1	0	1	2	0	0	0	1	0	0	4	0	0	1	3	2	0	1	0	3	0	1	2	4	0	6	0
ARHGEF11	0	2	5	0	3	0	4	2	3	3	2	3	8	8	11	9	2	2	3	7	9	8	3	1	2	6	4	7	5	5	4	19	22	18	13	16	14	16	14	32	17	21	11	8	17	6	3	10	1
ARHGEF12	13	89	52	53	27	67	69	52	66	88	105	105	114	79	125	107	124	186	151	129	71	85	97	120	109	81	169	68	88	115	37	90	118	86	72	74	65	98	86	115	129	119	89	51	66	114	104	46	48
ARHGEF15	0	0	0	0	0	0	0	0	0	0	0	0	0	0	0	0	0	0	0	0	0	0	0	0	0	0	0	0	0	0	0	0	0	0	0	0	0	0	0	0	0	0	0	0	0	0	0	0	0
ARHGEF16	0	2	5	1	0	1	2	2	1	9	11	6	11	22	19	17	18	5	4	5	6	16	10	4	9	7	1	13	9	8	13	23	22	26	10	18	22	23	48	49	15	40	13	14	15	30	27	20	15
ARHGEF17	0	0	0	0	0	0	1	1	0	0	0	0	0	0	0	0	0	0	1	0	0	0	0	0	0	0	0	0	0	0	0	0	0	2	0	0	0	0	0	0	0	0	0	0	0	1	0	0	0
ARHGEF18	0	8	4	2	1	3	7	8	10	10	32	29	41	13	23	23	21	29	26	25	14	16	24	13	24	20	32	20	18	19	13	16	26	22	8	11	20	22	28	53	35	75	26	12	15	29	18	13	10
ARHGEF19	0	1	0	1	0	0	0	0	0	0	0	0	0	1	0	0	0	0	0	0	0	0	0	0	0	0	0	0	0	0	0	0	0	0	0	0	0	0	0	1	0	0	0	0	0	0	0	1	0
ARHGEF2	0	1	2	0	0	4	2	0	1	1	0	6	1	5	6	2	7	5	0	3	7	15	12	6	5	3	1	0	0	4	2	9	5	4	8	5	10	9	11	8	10	14	3	8	15	13	3	0	0
ARHGEF25	0	0	0	2	0	0	1	0	0	0	0	0	2	2	1	0	0	0	1	0	0	0	2	0	0	0	0	0	0	2	0	0	2	1	0	2	2	0	4	0	0	1	1	0	0	1	0	0	2
ARHGEF26	12	52	54	40	13	24	68	41	90	92	87	87	78	68	136	117	121	121	125	133	139	120	134	120	100	115	98	87	107	83	155	277	252	187	175	214	257	213	346	344	308	395	258	254	296	283	194	102	91
ARHGEF28	31	92	73	44	50	32	125	41	128	132	226	280	264	189	322	312	233	265	312	310	282	361	311	211	275	255	244	193	232	174	98	197	220	179	72	127	83	212	217	329	316	359	258	271	306	409	101	51	70
ARHGEF3	10	83	50	51	16	17	102	34	63	81	105	144	116	151	67	114	170	183	198	168	126	88	124	104	153	165	186	158	111	113	108	170	182	162	130	164	164	195	255	321	277	257	181	175	147	201	236	111	116
ARHGEF33	2	3	4	3	16	4	8	6	6	19	8	6	12	6	6	5	7	7	9	17	6	1	7	3	16	13	12	7	10	14	8	1	16	12	5	3	8	15	12	11	15	2	3	3	6	20	3	6	5
ARHGEF37	8	37	15	14	14	11	46	29	27	29	46	62	74	63	36	34	28	23	44	30	12	13	30	37	51	49	71	53	70	88	4	24	11	14	17	37	27	29	19	26	14	22	77	42	57	70	50	37	22
ARHGEF38	11	32	25	38	21	54	43	29	42	58	32	20	50	49	40	23	15	30	30	41	30	17	13	21	52	45	81	57	39	50	13	23	28	32	41	33	37	26	51	41	41	58	59	32	38	57	81	27	32
ARHGEF39	8	10	5	8	1	8	15	5	13	8	13	17	48	29	30	16	12	31	7	10	5	5	8	15	46	35	17	11	12	31	14	29	33	34	35	15	30	32	45	57	90	58	19	10	12	29	29	23	12
ARHGEF4	0	4	0	1	0	0	1	1	4	1	1	2	2	0	6	0	0	3	7	3	4	3	0	3	0	1	5	0	7	3	6	13	13	2	2	4	2	7	2	0	5	0	2	3	4	7	13	5	0
ARHGEF40	0	1	1	0	0	0	0	0	1	1	1	0	0	2	0	1	0	2	1	0	8	0	0	0	0	0	2	0	2	0	1	9	0	2	2	5	0	1	14	5	6	11	0	1	3	1	1	0	4
ARHGEF5	0	4	4	1	1	0	3	0	3	3	3	10	10	10	6	3	4	2	5	4	0	3	11	5	13	7	2	5	3	7	3	1	7	0	2	0	13	1	6	3	2	11	3	1	7	1	5	1	3
ARHGEF6	1	0	0	0	0	0	0	2	0	0	2	0	0	0	1	0	0	0	0	0	0	2	1	0	0	0	0	4	0	1	0	0	0	5	0	0	0	0	0	0	0	0	0	0	0	0	0	0	0
ARHGEF7	1	11	0	2	0	4	3	2	5	5	15	8	11	9	16	9	5	13	7	4	5	7	8	12	15	14	7	6	14	17	3	7	3	10	7	10	5	6	17	17	9	5	11	14	10	12	7	8	9
ARHGEF9	4	2	0	1	2	1	1	3	7	1	1	0	3	3	1	1	3	6	10	3	2	0	1	7	7	2	2	4	1	3	0	5	6	6	1	0	0	2	2	7	1	7	0	1	0	5	1	4	2
ARID1A	94	56	65	53	47	53	78	39	84	87	106	120	120	118	241	131	87	109	127	120	114	118	136	78	104	119	146	127	159	171	47	67	104	54	132	80	68	118	131	106	147	128	125	92	55	92	122	78	80
ARID1B	1	10	9	18	3	5	23	7	20	22	23	25	17	30	28	15	12	15	25	30	17	32	33	25	37	20	35	37	30	16	15	34	37	32	19	32	34	38	33	68	59	55	42	26	11	28	29	11	13
ARID2	95	99	93	110	71	67	131	66	150	133	150	110	127	96	151	130	128	137	166	108	91	109	105	112	191	170	165	118	179	85	63	109	81	94	113	99	47	120	122	87	137	94	155	80	66	89	190	84	81
ARID3A	0	0	0	0	0	0	0	0	0	0	0	0	0	0	1	0	0	0	1	0	0	0	1	0	0	0	3	0	0	0	0	0	0	0	0	0	0	1	0	0	2	0	0	0	0	0	3	0	0
ARID3B	0	13	7	6	0	9	7	4	9	17	40	48	25	37	44	28	43	39	35	30	34	30	35	18	33	23	18	33	25	30	24	53	54	34	31	45	62	51	93	88	92	88	21	50	31	52	51	22	19
ARID3C	0	0	0	0	0	2	0	0	0	0	0	1	1	0	2	1	1	3	2	2	1	2	1	0	0	0	0	2	1	5	0	0	1	1	1	0	0	1	0	0	2	0	0	0	0	0	0	0	0
ARID4A	129	367	315	197	140	171	619	406	438	273	660	644	749	669	716	693	660	770	682	619	467	538	560	555	866	819	851	739	1016	919	266	500	557	398	362	371	408	425	674	705	644	659	700	482	385	571	542	392	346
ARID4B	29	45	26	31	26	31	46	22	40	55	57	60	59	64	94	68	66	52	67	35	52	68	65	53	84	85	72	56	84	62	20	41	35	34	33	27	27	38	63	70	84	96	78	31	34	43	47	47	33
ARID5A	0	0	2	1	2	1	2	4	0	1	14	10	13	9	22	15	18	12	16	8	9	10	11	8	23	9	13	4	0	5	12	21	49	20	16	24	22	19	34	47	38	60	10	16	17	20	11	9	4
ARID5B	115	382	169	142	130	143	290	215	267	244	370	417	333	312	487	550	394	400	573	434	263	313	309	241	473	442	384	274	627	668	189	257	298	204	238	288	238	356	354	368	311	351	435	375	274	406	272	151	172
ARIH1	13	55	51	40	23	26	70	55	54	63	84	90	103	68	90	99	110	97	122	137	48	55	65	88	105	102	135	112	117	99	37	100	118	78	56	54	67	137	94	116	124	181	116	47	76	97	67	45	44
ARIH2	3	12	13	4	0	7	27	4	14	6	62	66	65	68	78	39	40	35	52	56	63	54	70	22	57	45	53	34	29	42	50	89	90	71	17	110	74	69	87	170	135	135	36	111	109	68	7	5	5
ARIH2OS	0	2	2	3	1	0	0	0	1	0	0	0	3	2	0	3	1	4	5	3	2	0	2	0	7	5	1	1	5	6	1	1	1	0	1	3	4	3	1	0	1	1	0	3	3	6	2	2	0
ARL1	228	229	119	199	218	181	222	180	244	232	259	278	240	213	267	253	221	244	263	268	249	227	185	165	270	219	258	234	208	224	179	242	237	186	322	287	305	318	333	237	287	346	416	383	311	459	290	198	133
ARL10	0	3	1	1	2	1	7	6	10	1	15	6	14	11	22	8	5	7	8	6	5	7	12	2	15	9	5	9	3	11	5	21	11	11	11	31	28	17	11	13	10	18	15	21	31	20	5	7	2
ARL11	0	3	0	0	1	5	3	0	0	0	0	0	0	1	0	0	0	0	1	0	1	1	0	0	1	0	3	0	0	1	0	0	2	0	0	0	0	0	3	2	0	0	0	0	0	0	0	0	2
ARL13A	8	29	39	34	41	57	42	45	55	64	26	41	39	36	48	41	42	33	72	78	35	30	21	28	56	44	70	51	50	30	32	63	90	44	70	57	56	95	75	62	116	97	95	53	40	63	47	29	32
ARL13B	125	146	117	117	76	83	188	93	150	143	306	312	299	234	349	219	215	256	258	187	244	273	305	221	273	248	303	266	265	286	130	271	251	196	156	187	172	209	259	239	263	260	280	320	303	351	209	134	111
ARL14	0	0	0	0	0	0	0	0	0	0	0	0	0	0	0	0	0	0	0	0	0	0	0	0	0	0	0	0	0	0	0	0	0	0	0	0	0	0	0	0	0	0	0	0	0	0	0	0	0
ARL14EP	332	655	429	1212	746	1177	694	785	639	769	357	446	487	356	549	500	467	533	724	542	277	373	322	471	521	457	671	558	449	450	239	385	452	318	267	273	342	370	495	576	589	481	511	283	220	371	545	299	329
ARL14EPL	4	13	3	19	9	11	9	16	6	4	8	2	16	10	9	11	8	19	14	11	6	13	5	0	20	19	11	4	8	10	8	1	20	5	7	1	5	6	7	15	25	12	12	13	1	5	24	5	4
ARL15	82	227	135	141	90	84	235	141	209	229	255	249	342	306	275	247	297	385	411	378	252	280	262	251	440	379	339	304	385	326	171	342	456	251	260	214	251	302	406	439	545	440	351	291	152	288	415	191	205
ARL16	1	4	3	1	0	2	7	2	5	2	1	3	1	2	5	1	2	2	0	5	1	2	0	2	5	4	2	6	5	2	0	7	4	0	1	3	0	5	2	6	2	5	2	5	7	0	4	0	0
ARL2	2	8	7	6	1	4	13	7	14	10	6	7	5	14	17	21	11	14	10	15	9	6	12	9	10	9	12	14	8	5	7	6	11	9	4	6	5	2	9	12	10	6	10	1	5	7	6	3	5
ARL2BP	10	37	23	26	25	26	71	23	60	80	138	143	156	178	200	147	112	131	115	121	188	170	151	75	190	137	118	140	106	150	162	266	336	197	254	287	304	286	432	349	325	401	305	380	332	461	234	199	187
ARL3	4	6	2	5	11	9	3	7	6	4	4	9	6	8	2	11	6	9	9	12	8	4	4	5	8	4	9	4	7	6	0	8	8	3	1	1	3	1	7	6	1	3	16	4	6	2	8	2	2
ARL4A	167	318	224	263	240	252	361	247	394	324	318	404	462	379	513	566	363	414	462	373	335	341	327	267	677	610	498	391	435	432	205	397	456	275	366	349	346	503	476	502	469	540	634	408	391	526	530	275	234
ARL4C	0	0	0	0	0	0	0	0	0	0	0	1	0	0	0	0	0	0	2	0	0	0	0	0	0	1	0	0	0	0	0	0	0	0	1	0	0	0	0	0	1	1	0	0	0	0	0	0	0
ARL4D	4	1	5	9	0	1	13	12	9	0	10	25	5	2	18	27	6	14	36	18	25	27	22	13	31	11	42	15	10	3	26	44	54	21	0	4	1	6	56	51	41	40	68	73	52	72	23	21	15
ARL5A	61	90	109	68	69	78	119	84	123	105	203	164	220	211	235	174	186	203	179	207	231	230	208	147	168	161	239	192	183	177	169	313	233	233	96	169	213	209	104	294	290	284	214	271	248	238	60	43	47
ARL5B	86	136	77	112	69	107	156	93	149	144	99	94	90	92	129	149	112	147	145	131	105	154	87	109	89	101	155	107	149	97	79	114	141	107	97	79	49	70	127	141	129	123	84	101	70	100	129	71	61
ARL5C	0	0	0	0	0	0	0	0	0	0	0	0	0	0	0	0	0	0	0	0	1	0	0	0	0	0	0	0	0	0	0	0	0	0	0	0	0	0	0	0	0	0	0	0	0	0	0	0	0
ARL6	316	560	329	537	301	491	589	441	576	671	540	542	656	614	487	486	747	781	822	747	483	550	502	481	939	798	834	567	700	482	551	865	924	659	855	713	705	830	1172	1181	1152	1092	827	778	477	689	1244	621	587
ARL6IP1	181	724	380	517	355	535	482	411	882	730	691	858	833	730	1006	943	906	1063	1033	841	558	673	683	635	1059	1120	989	760	606	704	477	800	956	702	801	869	859	1130	1240	1544	1421	1274	1056	681	473	797	960	462	493
ARL6IP4	1	7	1	0	3	2	5	2	2	1	8	3	5	6	13	7	2	16	9	20	8	7	12	7	3	2	12	4	5	4	1	5	10	4	5	12	9	10	14	15	14	14	6	4	6	4	8	7	8
ARL6IP5	3	5	2	8	1	6	5	8	10	14	4	11	10	13	9	15	2	22	15	12	7	4	8	8	13	12	13	10	5	13	2	3	14	3	1	4	4	12	5	7	19	10	19	5	11	14	21	3	4
ARL6IP6	69	79	57	124	59	78	116	96	85	94	48	77	127	116	83	91	169	167	140	103	96	109	110	76	150	121	131	109	94	105	124	153	191	146	138	103	116	141	239	240	217	261	111	104	90	117	169	134	86
ARL8A	0	0	1	0	0	0	0	1	0	0	0	0	0	0	1	0	0	0	2	0	0	3	0	0	0	4	0	1	0	1	0	0	3	0	1	1	4	0	0	0	0	1	0	0	1	0	0	0	1
ARL8B	4	10	40	9	6	22	80	28	58	38	82	112	148	120	112	96	76	65	86	91	89	95	90	63	143	85	127	92	139	134	63	126	129	90	7	40	103	115	7	150	137	204	14	78	134	191	8	1	2
ARL9	0	0	0	0	0	0	0	0	0	0	0	0	0	1	1	0	3	0	2	0	0	0	0	0	0	0	0	0	0	0	0	0	0	1	0	0	1	1	0	0	1	1	0	0	0	1	0	0	0
ARMC1	167	446	278	247	213	202	409	245	420	384	463	584	637	642	709	668	618	667	547	579	639	692	587	437	687	630	818	721	720	720	442	763	698	555	594	651	606	875	932	988	944	1091	949	778	628	1078	898	502	372
ARMC10	93	302	299	240	268	267	449	261	532	470	615	701	737	634	775	581	580	677	677	622	563	572	569	449	781	624	848	735	835	692	609	1073	1143	764	809	883	858	957	896	1266	1152	1194	1051	1194	956	1183	1014	546	594
ARMC12	1	7	0	6	13	4	12	9	18	21	6	3	1	0	2	4	5	0	3	5	4	3	2	3	1	0	13	26	4	2	7	17	19	10	18	6	10	4	32	35	19	25	1	0	1	4	2	4	2
ARMC2	37	180	97	234	142	237	133	145	225	230	115	177	210	134	214	255	184	259	249	239	125	134	143	130	239	255	234	183	164	170	125	194	288	177	172	197	198	309	356	400	480	387	273	140	111	207	224	131	105
ARMC3	0	0	0	0	0	0	1	0	0	0	0	0	0	0	0	0	1	0	0	0	0	0	0	0	0	0	0	0	0	0	0	0	0	0	0	0	0	0	0	0	0	0	0	0	0	0	0	0	0
ARMC4	2	1	1	4	0	2	2	0	0	0	2	1	0	2	0	0	1	0	0	0	0	0	0	3	0	0	1	0	0	0	0	0	0	0	0	0	0	2	0	0	0	0	0	0	3	0	4	2	2
ARMC5	0	0	0	0	0	0	0	0	0	0	1	0	0	0	5	2	0	0	0	0	1	0	0	0	1	0	1	0	0	0	1	0	2	1	0	0	0	1	0	2	0	0	0	0	0	2	0	0	0
ARMC6	0	0	0	0	0	1	0	0	0	0	0	0	0	0	0	1	0	0	2	0	0	0	0	0	0	0	0	0	0	1	0	0	0	0	0	0	1	0	0	2	0	0	0	0	0	0	0	0	0
ARMC7	3	13	10	5	3	1	5	8	3	10	36	27	16	16	54	37	26	31	38	22	41	36	43	18	30	36	32	23	15	23	42	48	52	35	40	76	75	57	144	130	110	147	34	65	52	66	49	40	29
ARMC8	16	55	30	31	25	35	57	15	43	70	53	48	65	52	46	53	54	62	58	44	62	65	69	40	80	50	88	73	65	44	30	70	73	48	56	46	45	82	72	53	104	67	110	64	66	109	81	36	24
ARMC9	6	3	2	4	7	6	4	4	2	2	5	3	4	4	3	1	4	2	2	6	1	0	0	2	4	6	0	1	5	2	1	1	1	0	0	3	1	2	1	4	7	4	2	4	1	1	9	0	0
ARMCX1	0	0	0	0	0	0	0	0	0	0	0	0	0	0	0	0	0	0	0	0	0	0	0	0	0	0	0	0	0	0	0	0	0	0	0	0	0	0	0	0	0	0	0	0	0	0	0	0	0
ARMCX2	0	0	0	0	0	0	0	0	0	0	0	0	0	0	0	0	0	0	0	0	0	0	0	0	0	0	0	0	0	0	0	0	0	0	0	0	0	0	0	0	0	0	0	0	0	0	0	0	0
ARMCX3	0	0	0	0	0	0	0	0	0	0	0	0	2	0	0	0	0	0	0	0	0	0	0	0	0	0	1	1	0	0	0	3	0	0	0	0	0	0	0	0	1	0	0	0	0	0	1	0	0
ARMCX4	0	0	0	0	0	0	0	0	0	0	0	0	0	0	0	0	0	0	0	0	0	0	0	0	0	0	0	0	0	0	0	0	0	0	0	0	0	0	0	0	0	0	0	0	0	0	0	0	0
ARMCX5	9	8	4	11	0	15	3	6	44	4	8	16	12	21	10	10	3	4	38	41	3	10	36	18	1	5	6	8	19	21	4	16	13	9	3	9	7	25	25	27	16	15	3	0	5	6	8	0	6
ARMCX6	0	0	0	0	0	0	0	0	0	0	0	0	0	0	0	0	0	0	0	0	0	0	0	0	0	0	0	0	0	0	0	0	0	0	0	0	0	0	0	0	0	0	0	0	0	0	0	0	0
ARMH1	15	29	15	12	7	19	16	15	29	30	30	32	16	17	28	53	32	38	53	46	34	21	22	23	26	14	36	27	38	65	9	13	10	4	8	31	19	30	34	20	33	48	41	21	14	30	29	16	25
ARMH2	0	0	0	0	0	0	0	0	0	0	0	0	0	0	0	0	0	0	0	0	0	1	0	0	0	0	0	0	0	0	0	0	0	0	0	0	0	1	0	0	0	0	0	0	0	0	0	0	0
ARMH3	7	34	12	15	6	17	32	10	30	23	65	92	72	60	74	79	66	60	71	78	75	53	65	55	70	69	65	80	68	65	74	129	119	59	66	118	85	73	185	169	202	200	147	109	127	146	81	41	45
ARMH4	15	160	41	32	18	20	139	56	93	65	199	227	222	158	225	191	160	157	175	177	123	147	95	90	177	165	181	104	220	215	136	166	241	189	138	112	103	183	313	363	312	323	260	160	135	188	150	107	90
ARMT1	0	2	0	0	0	0	0	0	0	0	0	0	0	0	0	0	0	0	0	0	0	0	0	0	0	0	5	2	0	0	0	0	0	0	0	0	1	0	0	0	2	0	0	0	0	0	0	1	0
ARNT	0	0	1	0	0	0	3	0	0	3	1	1	2	1	4	0	1	0	0	4	4	0	7	0	4	0	0	1	1	1	0	7	8	6	3	0	6	3	5	4	17	10	0	4	9	4	1	2	0
ARNT2	3	3	6	4	3	5	6	1	8	8	2	0	3	5	18	6	3	1	12	8	3	4	0	0	1	3	9	0	2	11	3	1	1	3	3	4	2	8	4	1	2	9	1	4	1	1	10	6	6
ARNTL	96	154	85	117	57	82	149	102	161	147	334	344	248	251	277	257	187	206	229	252	257	257	253	168	313	232	324	282	261	321	208	321	422	289	303	359	323	379	560	637	561	610	431	555	463	594	344	208	208
ARNTL2	0	0	0	0	0	0	0	0	0	0	0	0	0	0	0	0	0	0	0	0	0	0	0	0	0	2	0	3	0	0	0	0	0	0	0	0	0	0	0	0	0	0	0	0	5	0	0	0	0
ARPC1A	2	71	23	23	10	27	67	27	49	47	50	45	128	100	168	107	120	126	133	99	82	81	124	87	119	145	115	100	74	83	54	61	110	55	101	121	76	176	218	177	208	209	105	140	90	158	157	49	81
ARPC1B	1	18	15	10	2	12	16	10	7	10	24	26	41	44	69	59	41	45	89	58	46	50	45	16	49	37	35	39	18	46	47	49	35	48	36	32	39	48	129	101	112	114	50	77	44	70	34	8	15
ARPC2	58	214	102	70	68	93	234	83	187	203	338	388	395	420	649	564	466	498	498	445	481	506	485	328	504	460	488	407	267	343	457	770	931	686	537	645	626	790	1053	1108	1199	1154	420	521	385	577	618	368	343
ARPC3	24	14	4	15	9	26	6	7	3	6	2	7	5	2	2	3	7	12	4	6	2	1	3	3	3	11	4	11	6	2	0	1	5	1	7	3	2	3	5	6	0	9	2	5	6	8	2	5	2
ARPC4	11	31	25	40	35	38	38	31	38	64	26	46	51	53	104	101	93	131	102	75	51	42	73	53	76	81	60	77	46	55	45	60	77	62	76	108	77	85	150	125	125	128	72	50	46	98	70	26	40
ARPC5	2	37	18	11	9	8	16	17	8	14	25	27	36	26	19	25	42	57	44	40	21	13	33	26	25	26	16	14	29	21	19	32	43	33	41	56	33	46	105	53	57	75	40	9	6	29	32	18	25
ARPC5L	4	41	7	5	11	13	29	14	26	33	67	60	89	60	104	85	65	87	116	81	70	57	88	69	70	76	92	81	60	45	76	97	101	93	101	115	83	124	157	210	193	217	107	72	54	94	77	68	47
ARPIN	1	6	6	2	3	9	7	8	9	9	25	32	42	48	60	40	38	24	35	24	31	51	39	18	42	37	37	40	41	47	28	74	48	50	45	53	60	51	80	60	41	76	71	116	76	86	34	39	33
ARPP19	364	638	508	829	786	906	829	701	597	715	370	427	516	428	474	506	526	595	634	542	422	409	511	419	618	555	815	691	610	609	284	377	505	381	425	383	367	535	542	532	568	580	495	412	213	487	575	308	271
ARPP21	31	53	65	37	24	50	96	23	69	100	75	88	52	71	193	199	108	155	208	182	190	210	170	132	61	44	237	201	106	147	76	122	191	163	138	154	98	153	191	213	183	184	254	203	153	224	181	124	143
ARR3	0	0	0	0	0	0	0	0	0	0	0	0	0	0	0	0	0	0	0	0	0	0	0	0	0	0	0	0	0	0	0	0	0	0	0	0	0	0	0	0	0	0	0	0	0	0	0	0	0
ARRB1	0	1	0	2	0	1	0	0	0	2	3	4	3	0	5	5	2	2	4	3	4	4	0	1	1	4	2	6	2	0	1	10	2	4	0	3	4	5	6	8	16	6	8	8	1	4	2	0	9
ARRB2	0	1	0	0	0	0	1	0	0	0	0	3	0	1	2	0	2	1	3	5	1	1	3	0	1	1	2	1	1	1	1	2	1	0	0	2	2	5	1	0	1	1	0	0	0	2	0	0	0
ARRDC1	0	19	20	4	3	6	42	5	27	15	89	110	109	117	95	85	56	50	84	62	74	63	94	47	109	70	111	114	70	99	51	73	90	61	39	57	80	72	134	117	134	137	84	83	82	115	33	53	21
ARRDC2	6	22	10	20	6	14	23	2	21	18	69	35	52	77	106	75	86	66	52	73	83	81	110	40	198	158	72	52	73	70	121	189	164	128	52	104	125	103	168	182	116	203	94	206	175	209	97	71	83
ARRDC3	28	139	136	119	112	72	154	96	218	217	166	148	188	177	196	244	217	266	287	241	160	199	110	149	232	216	235	204	244	201	102	187	159	136	136	125	115	186	189	191	199	204	190	108	54	151	164	116	93
ARRDC4	3	3	4	4	5	2	3	6	0	10	3	0	5	0	10	4	8	7	5	8	2	0	3	2	5	2	2	9	0	0	1	0	4	2	0	5	2	53	2	10	7	8	2	0	1	14	0	2	0
ARRDC5	0	0	0	0	0	0	2	0	0	0	0	0	0	0	0	0	0	0	0	0	0	0	0	0	0	0	0	0	0	0	0	0	0	0	0	0	0	0	0	0	0	0	0	0	0	0	0	0	0
ARSA	0	0	0	0	0	0	1	0	0	2	1	3	0	2	2	1	1	0	4	4	1	0	1	1	1	0	1	1	3	0	2	1	8	0	1	0	0	4	0	5	3	7	2	2	0	4	10	0	0
ARSB	19	11	18	17	13	13	23	24	36	28	29	31	49	16	55	34	29	27	50	33	47	31	31	26	17	25	61	18	39	18	12	11	34	18	12	45	34	22	32	24	35	35	19	78	97	94	5	21	9
ARSE	0	0	0	0	0	0	0	0	0	0	0	0	0	0	0	0	0	0	0	0	0	0	0	0	0	0	1	0	0	0	0	0	0	0	0	0	0	0	0	0	0	0	0	0	0	0	0	0	0
ARSG	0	0	0	0	0	0	0	0	0	3	1	1	1	1	2	2	3	7	2	0	4	0	1	0	5	2	0	0	1	4	2	6	5	3	0	2	2	2	2	3	3	5	2	2	2	14	1	0	0
ARSH	0	0	0	0	0	0	0	0	0	0	0	0	0	0	0	0	0	0	0	0	0	0	0	0	0	0	0	0	0	0	0	0	0	0	0	0	1	1	0	0	0	0	0	0	0	0	0	0	0
ARSI	0	0	0	0	0	0	0	0	0	0	0	0	0	0	0	0	0	0	0	0	0	0	0	0	1	0	1	4	0	0	0	0	0	0	0	0	0	0	0	0	0	0	0	0	0	0	0	0	0
ARSJ	0	1	0	0	0	0	0	0	0	0	0	0	0	0	0	0	0	0	0	0	0	0	0	0	0	0	0	0	0	0	0	0	0	0	0	0	0	0	0	0	0	0	0	0	0	0	0	0	0
ARSK	0	0	0	0	0	0	0	2	0	0	0	3	0	0	0	1	3	0	0	0	1	0	4	0	0	4	0	0	0	1	0	0	0	0	0	0	0	0	0	0	0	0	0	0	0	0	0	0	0
ART1	0	0	0	0	0	0	0	0	0	0	0	0	0	0	0	0	0	0	0	0	0	1	0	1	0	0	0	0	1	0	0	0	0	0	0	1	0	0	0	0	0	0	0	0	0	0	0	0	0
ART3	66	97	21	51	74	38	72	88	54	46	53	58	58	48	77	84	49	54	82	78	33	46	38	49	66	69	96	40	66	63	43	81	95	57	32	34	42	52	81	88	88	91	90	63	24	62	28	27	19
ART4	0	0	0	0	0	0	0	0	0	0	0	0	0	0	0	0	0	0	0	0	0	0	0	0	0	0	0	0	0	0	0	0	0	0	0	0	0	0	0	0	0	0	0	0	0	0	0	0	0
ARTN	0	0	0	0	0	0	0	0	0	0	0	0	0	0	0	0	0	0	0	0	0	0	0	0	0	0	0	0	0	0	0	0	0	0	0	0	0	0	0	0	0	0	0	0	0	0	0	0	0
ARV1	0	5	2	12	1	3	5	3	3	9	0	6	1	3	1	2	4	1	4	9	0	1	7	1	11	3	7	8	7	6	1	7	0	3	4	1	10	6	3	4	3	4	2	1	2	2	4	4	3
ARVCF	0	0	0	0	0	1	1	1	1	0	1	0	2	0	1	0	0	0	3	0	0	1	2	0	0	0	2	4	1	0	0	1	0	2	1	1	0	0	3	3	0	2	2	1	0	3	2	1	0
ARX	0	0	1	3	0	0	1	0	0	0	0	0	0	0	0	1	0	0	0	0	0	1	0	0	0	2	0	0	0	1	0	0	1	2	0	0	0	2	1	0	1	1	0	0	0	0	0	0	0
AS3MT	11	25	12	32	15	43	19	23	29	30	30	40	21	30	41	49	44	54	82	69	21	38	33	39	54	38	58	70	32	22	15	24	41	33	24	23	28	35	85	85	47	82	16	32	12	23	47	26	24
ASAH1	11	84	71	67	54	88	159	74	102	109	66	59	71	68	70	116	104	113	137	91	37	36	53	61	128	87	115	111	89	83	58	70	117	71	97	117	102	132	149	98	147	134	123	110	69	70	111	76	55
ASAH2	0	12	7	2	2	5	2	0	15	17	10	8	10	13	0	8	10	9	2	11	6	2	5	4	8	8	19	5	12	4	1	5	11	10	27	27	27	21	10	26	9	22	20	18	12	15	20	11	9
ASAP1	39	71	39	65	44	48	77	44	42	62	73	81	58	43	70	66	36	57	64	58	41	53	47	44	47	43	86	80	76	71	24	40	53	41	48	44	51	52	74	77	86	91	82	45	51	68	59	33	18
ASAP2	0	4	5	5	3	7	9	7	8	3	4	8	9	14	13	12	4	5	10	10	4	10	6	3	3	7	15	21	8	7	1	6	5	8	9	6	13	9	6	11	8	10	10	11	8	11	22	9	14
ASAP3	0	1	1	0	0	0	3	0	4	3	2	0	3	2	2	0	9	0	2	8	7	8	3	3	7	3	1	4	1	0	7	12	11	7	7	5	14	7	22	17	20	15	4	10	5	8	5	1	1
ASB1	0	0	0	0	0	0	0	1	1	1	0	1	5	2	3	4	2	3	2	2	2	1	3	3	0	5	2	2	0	3	2	0	4	2	1	0	8	3	0	5	11	16	2	0	2	8	1	0	0
ASB10	0	0	0	0	0	0	0	0	0	0	0	0	0	0	1	0	0	0	0	0	0	0	0	0	0	0	0	0	0	0	0	0	0	0	0	0	0	0	0	0	1	0	0	0	0	0	0	0	0
ASB11	114	162	187	143	192	161	315	173	275	253	332	311	208	180	403	387	349	383	496	457	212	182	265	266	217	195	515	422	297	323	204	387	431	280	306	293	258	378	474	408	435	419	404	281	263	292	481	341	238
ASB12	0	5	1	0	8	1	3	0	5	2	5	3	7	12	2	1	0	0	5	10	2	0	3	2	11	6	10	2	14	7	0	2	1	1	0	6	5	5	3	0	1	3	13	0	1	8	9	3	3
ASB13	0	0	0	0	0	0	0	0	0	0	0	1	0	0	0	0	0	0	0	0	0	0	0	0	0	0	1	0	0	0	0	0	1	0	0	0	0	0	1	0	0	0	0	0	0	0	0	1	0
ASB14	0	1	0	0	0	0	0	0	0	0	1	0	0	0	0	0	0	0	0	0	0	0	0	0	0	0	0	0	0	0	0	0	0	0	0	0	0	0	0	0	0	0	0	0	0	0	0	0	0
ASB15	0	0	0	0	0	0	0	0	0	0	0	0	1	0	0	0	2	0	0	0	0	1	0	0	0	0	5	0	0	0	0	0	0	0	0	0	0	0	4	0	2	0	4	0	0	0	0	0	0
ASB16	1	1	1	1	0	3	1	2	2	7	7	1	4	7	10	3	0	1	7	2	3	4	0	1	0	7	4	7	8	1	0	14	6	13	6	4	8	13	1	0	6	22	0	0	2	0	3	1	0
ASB17	0	0	0	0	0	0	0	0	0	0	0	0	0	0	0	0	0	0	0	0	0	0	0	0	0	0	0	0	0	0	0	0	0	0	0	0	0	0	0	0	0	0	0	0	0	0	0	0	0
ASB18	0	0	0	0	0	0	0	0	0	0	0	0	0	0	0	0	0	0	0	0	0	0	0	0	0	0	0	0	0	0	0	0	0	0	0	0	0	0	0	0	0	0	0	0	0	0	0	0	0
ASB2	0	0	0	0	0	0	0	0	0	0	0	0	0	0	0	0	0	0	0	0	0	0	0	0	0	0	0	0	0	0	0	0	0	0	0	0	0	0	0	0	0	0	0	0	0	0	0	0	0
ASB3	59	213	105	86	41	50	224	104	191	190	156	217	275	166	228	255	380	387	330	303	155	210	256	210	241	265	336	245	178	183	193	320	337	326	382	380	358	555	589	490	500	479	426	281	160	288	455	212	208
ASB4	0	0	0	0	1	0	0	0	0	0	0	0	0	0	1	1	0	0	1	0	0	0	0	0	0	0	0	0	1	0	0	0	1	0	0	0	0	0	0	0	0	1	0	0	0	0	0	0	0
ASB5	0	0	0	0	0	0	0	4	0	0	0	0	0	0	3	0	0	0	0	0	0	0	0	1	2	0	0	2	0	4	3	0	0	4	0	0	0	0	0	0	1	0	3	0	1	0	0	0	0
ASB6	0	7	3	1	1	0	6	1	3	5	19	24	30	15	32	24	13	16	28	24	29	24	32	9	37	19	19	14	16	13	19	21	25	28	15	42	26	17	61	66	25	72	20	26	23	23	47	15	12
ASB7	3	13	2	2	5	4	6	0	5	6	3	4	7	4	12	8	5	0	3	5	1	1	1	2	2	5	1	5	3	1	3	4	7	0	0	4	2	5	1	11	17	6	1	0	2	1	0	0	2
ASB8	13	73	30	9	14	12	58	12	37	50	101	101	118	66	82	133	81	74	84	115	89	74	90	73	88	89	114	85	107	107	89	112	157	98	106	87	117	135	218	205	173	165	148	94	76	113	164	109	63
ASB9	0	0	1	0	0	0	1	3	0	2	0	0	2	0	0	0	0	1	0	0	0	0	0	0	3	3	0	0	0	1	0	1	1	1	0	3	0	0	7	9	1	6	0	1	3	0	3	0	3
ASCC1	23	102	74	69	54	55	79	74	107	171	149	148	123	145	140	186	167	154	162	119	81	101	102	80	177	204	154	127	156	116	96	170	186	111	152	138	153	199	196	202	213	256	199	202	112	176	207	127	113
ASCC2	1	2	1	2	0	0	6	3	4	1	9	8	8	5	16	14	16	12	16	12	9	15	16	2	12	4	5	7	1	9	2	14	11	3	10	13	14	8	32	20	16	10	2	13	12	1	10	5	8
ASCC3	20	78	28	47	15	24	85	47	61	58	37	75	116	90	63	68	63	106	110	97	79	78	84	66	71	90	108	91	109	62	42	111	90	52	42	51	81	83	157	131	125	127	93	97	99	158	115	74	58
ASCL1	0	0	0	0	0	0	0	0	0	0	0	0	0	0	0	0	0	0	0	0	0	0	0	0	0	0	0	0	0	0	0	0	0	0	0	0	0	0	0	0	0	0	0	0	0	0	0	0	0
ASCL2	0	0	0	0	0	0	0	0	0	0	0	0	0	0	0	0	0	0	0	0	0	0	0	0	0	0	0	0	0	0	0	1	0	0	0	0	0	0	0	0	0	0	0	0	0	0	0	0	0
ASCL3	0	0	0	0	0	0	0	0	0	0	0	0	0	0	0	0	0	0	0	0	0	0	0	0	0	0	0	0	0	0	0	0	0	0	0	0	0	0	0	0	0	0	0	0	0	0	0	0	0
ASCL4	0	3	1	0	0	5	0	0	0	0	2	0	2	1	0	1	1	2	2	0	0	0	0	0	0	0	4	0	2	1	1	0	0	0	5	1	0	0	0	0	0	0	2	0	0	1	2	0	1
ASCL5	0	0	0	0	0	0	0	0	0	0	0	0	0	0	0	0	0	0	0	0	0	0	0	1	0	0	0	0	0	0	0	0	0	0	0	0	0	0	0	0	0	0	0	0	0	0	0	0	0
ASF1A	52	198	75	314	197	218	184	160	175	231	142	165	271	236	288	267	282	334	325	249	143	217	189	174	269	215	285	176	158	171	253	451	460	312	288	325	346	375	595	708	588	689	264	236	246	317	293	202	160
ASF1B	193	335	268	121	73	69	518	127	720	467	1250	1806	1890	1990	1854	1705	1196	1037	1194	1306	1646	1756	1672	819	2600	2078	1520	1421	1440	2078	1054	1879	2155	1586	1177	1476	1416	1843	2369	2511	2491	2364	2236	1959	1513	2202	1925	1255	1026
ASGR1	0	3	2	0	0	1	1	5	6	1	5	2	10	4	7	6	4	5	3	9	2	1	9	1	1	0	8	3	5	9	1	0	3	1	3	2	3	4	5	4	8	6	5	1	2	11	4	2	3
ASGR2	0	0	1	0	2	2	0	0	0	0	0	0	0	0	0	1	0	0	0	0	0	0	0	0	0	0	0	3	0	0	0	0	0	0	0	0	0	0	0	0	0	0	0	0	0	0	0	0	0
ASH1L	2	54	39	13	2	12	20	16	48	39	49	52	62	31	87	67	48	62	54	32	29	57	52	56	65	62	76	56	68	55	6	36	42	22	33	19	27	25	76	66	61	59	33	42	28	42	46	41	16
ASH2L	29	98	74	42	31	38	117	54	115	103	226	270	363	346	416	339	346	387	349	319	432	481	472	244	386	279	340	303	248	264	432	749	659	513	507	509	615	589	862	816	709	808	546	666	530	661	550	319	269
ASIC1	2	6	5	6	2	5	8	3	17	6	9	17	8	10	11	12	7	12	11	21	6	11	20	10	16	13	7	7	10	11	5	9	22	8	15	7	5	10	21	21	18	14	7	7	16	17	10	12	7
ASIC2	0	0	0	0	0	0	0	0	0	0	0	0	0	0	0	0	0	0	0	0	0	0	0	0	0	0	0	0	0	0	0	0	0	0	0	0	0	0	0	0	0	0	0	0	0	0	0	0	0
ASIC3	0	0	0	0	0	0	0	0	0	0	0	1	0	0	3	0	0	0	0	0	0	0	0	1	0	1	0	0	0	0	0	0	0	0	0	0	0	1	0	0	0	0	3	0	0	0	0	0	0
ASIC4	0	0	0	0	0	0	0	1	0	0	0	0	0	0	0	0	0	0	0	0	0	0	0	0	0	0	0	0	0	0	0	0	0	0	0	0	0	0	0	0	0	0	0	0	0	0	0	0	0
ASIC5	0	0	0	0	0	0	0	0	0	0	0	0	0	0	0	0	0	0	0	0	0	0	0	0	0	0	0	0	0	0	0	0	0	0	0	0	0	0	0	0	0	0	0	0	0	0	0	0	0
ASIP	1	1	0	1	0	1	0	0	0	0	0	1	0	0	2	0	0	0	4	4	0	1	2	0	0	0	0	0	0	0	0	0	0	0	0	0	0	0	0	0	0	0	0	0	0	0	0	0	0
ASL	0	4	1	3	3	2	8	9	4	3	4	0	5	5	0	4	2	3	5	9	1	1	5	6	2	9	6	7	7	3	0	0	5	0	2	0	2	1	0	1	4	1	0	1	1	0	1	2	5
ASMT	0	0	0	0	0	0	3	0	0	0	2	0	1	3	0	0	1	0	2	5	0	4	0	1	1	0	5	4	1	2	0	3	0	1	0	3	5	0	10	9	3	6	1	0	1	3	1	0	2
ASMTL	0	0	0	0	0	0	0	0	0	1	0	0	1	3	0	1	0	0	4	1	0	0	1	0	2	1	0	1	1	4	0	2	2	0	0	0	1	4	1	2	2	6	0	0	0	2	0	0	0
ASNA1	0	9	8	10	4	2	16	2	7	10	14	16	16	16	24	24	13	18	16	19	6	10	13	7	23	10	18	20	18	13	12	16	22	8	15	19	11	20	37	32	37	31	15	31	13	13	16	10	10
ASNS	36	104	70	84	38	38	122	51	89	96	105	97	69	61	50	56	106	123	111	128	56	77	100	65	107	113	114	92	76	88	39	45	73	42	59	45	25	31	116	103	72	87	77	70	31	64	153	61	84
ASNSD1	10	136	40	46	1	25	63	45	81	27	157	147	109	64	236	279	251	319	349	280	201	222	194	202	68	44	211	185	99	120	102	101	196	132	120	140	92	161	265	233	256	286	175	200	120	221	81	47	34
ASPA	0	0	0	0	0	0	0	0	0	0	0	1	0	0	0	0	0	0	0	1	0	0	0	0	0	0	1	0	2	0	0	0	1	0	0	0	0	0	0	0	0	0	0	0	0	0	0	0	0
ASPDH	0	2	0	0	1	0	0	0	0	0	0	0	0	0	0	0	2	0	0	1	0	0	0	0	0	0	0	0	0	0	0	0	0	0	0	0	0	0	0	0	0	0	0	0	0	0	0	0	0
ASPG	0	0	0	0	0	0	0	0	0	0	0	0	0	0	0	0	0	0	0	0	0	0	0	0	0	0	0	0	0	0	0	0	0	0	0	0	0	0	0	0	0	0	0	0	0	0	0	0	0
ASPH	1	6	0	1	1	2	1	3	3	5	1	1	4	2	7	1	2	1	2	3	0	1	0	2	4	4	17	14	8	5	1	0	2	2	2	2	5	1	10	8	19	10	0	3	1	7	27	10	6
ASPHD1	0	0	0	0	0	0	0	0	0	0	0	3	0	1	0	1	0	0	0	2	0	0	3	0	0	2	0	0	0	0	2	2	0	1	3	4	1	1	2	1	2	1	1	2	0	1	0	0	0
ASPHD2	1	1	0	1	2	3	3	0	4	3	2	1	3	4	4	5	3	5	4	5	1	2	3	1	2	5	6	3	1	2	2	4	0	5	3	2	4	3	6	3	0	5	9	0	1	1	6	3	1
ASPM	451	462	289	463	395	251	629	349	590	659	377	381	620	471	635	750	575	591	865	814	512	664	525	448	427	456	855	777	778	688	258	443	589	432	416	365	404	611	888	992	931	916	962	679	511	919	773	445	453
ASPN	0	0	0	2	0	0	0	0	1	0	0	0	0	0	0	0	0	0	0	0	0	0	0	1	0	0	0	0	0	1	0	1	0	0	0	0	0	3	0	0	1	0	0	0	0	0	0	0	0
ASPRV1	0	3	2	0	2	2	0	0	0	0	1	0	4	3	0	2	4	0	1	1	1	2	2	0	9	4	2	2	4	2	2	2	3	2	0	0	1	1	2	3	7	0	3	6	3	5	6	5	4
ASPSCR1	0	4	1	1	0	2	6	1	0	0	6	10	18	8	10	13	11	16	15	25	20	16	16	11	7	12	6	12	6	13	11	15	27	25	6	12	19	12	45	35	28	63	16	21	13	11	12	10	11
ASRGL1	6	27	10	9	5	8	30	11	25	16	102	72	118	70	99	91	55	45	70	101	84	76	89	47	78	61	36	47	76	94	56	115	107	63	40	67	85	66	172	133	127	174	101	108	97	96	92	57	55
ASS1	1	3	1	3	4	6	2	0	5	1	0	1	2	0	4	1	0	2	2	4	2	3	0	1	1	0	0	0	1	1	0	0	1	0	0	0	2	1	2	0	0	3	0	4	0	1	2	0	1
ASTE1	0	23	8	1	5	4	1	4	4	4	21	5	15	19	16	7	11	17	18	13	8	18	12	1	30	20	9	27	12	11	7	44	12	10	7	10	21	13	23	11	12	43	18	18	21	32	14	7	15
ASTL	13	141	61	27	15	41	180	49	100	60	297	350	266	249	508	385	216	260	399	407	291	259	324	155	191	160	223	145	164	222	193	321	350	270	212	304	276	288	631	755	529	656	283	381	331	481	324	179	138
ASTN1	1	0	0	0	1	0	0	1	0	2	1	0	0	1	0	1	4	0	0	0	0	1	0	0	0	2	0	0	2	0	0	1	1	2	0	0	0	1	0	5	1	0	0	0	0	1	1	0	0
ASTN2	0	13	3	6	0	1	9	8	6	5	7	11	16	9	14	12	21	17	13	19	13	11	29	7	23	16	19	10	13	12	7	17	13	9	15	19	16	20	29	32	25	18	4	8	13	23	13	17	14
ASXL1	0	5	0	4	0	0	0	1	0	0	0	5	4	0	0	5	1	2	7	0	1	1	0	1	2	0	4	5	2	2	2	2	3	2	1	1	5	3	9	1	0	2	15	4	1	2	0	1	0
ASXL2	19	114	54	29	40	56	111	38	98	100	152	192	190	137	197	160	120	164	160	125	136	166	153	125	169	151	155	151	143	130	101	197	168	88	138	121	206	146	311	330	271	306	137	262	242	174	101	56	54
ASXL3	0	7	3	3	0	3	1	6	0	7	7	11	3	9	8	7	6	6	15	6	5	1	1	7	10	4	8	7	9	5	4	12	2	4	1	8	9	5	6	8	17	9	8	5	1	5	4	6	10
ASZ1	193	78	44	85	75	61	110	88	115	150	116	134	137	129	61	115	119	151	158	122	111	129	95	102	119	98	107	94	162	147	48	70	124	97	76	53	63	108	86	122	98	118	112	110	68	69	164	84	60
ATAD1	226	493	306	286	213	206	573	319	561	695	393	464	660	505	448	564	628	745	770	610	464	481	562	496	830	749	896	716	676	519	484	644	825	567	639	607	577	794	879	1055	1087	912	767	604	573	779	923	584	530
ATAD2	23	41	18	11	12	13	69	28	38	31	171	165	142	112	129	83	109	134	93	83	89	105	72	90	160	113	147	82	83	98	18	43	40	38	27	39	29	37	61	62	73	68	77	43	59	61	42	36	38
ATAD2B	7	34	23	19	43	8	23	11	19	28	39	48	39	32	45	35	23	38	51	39	51	47	27	13	44	44	40	33	49	39	32	33	39	27	28	43	22	16	53	37	44	43	51	36	39	53	30	23	16
ATAD3A	0	0	0	0	0	0	0	0	0	0	0	0	0	0	0	0	0	0	0	0	0	0	1	0	0	0	0	0	0	1	0	0	0	0	0	0	0	0	0	0	0	0	0	0	0	0	0	0	0
ATAD5	118	220	132	155	101	166	232	171	275	278	295	386	423	316	340	305	357	329	375	274	298	345	258	196	311	276	440	327	397	378	111	215	248	173	176	211	160	187	346	359	371	331	423	298	242	365	279	207	177
ATAT1	0	4	6	4	6	0	6	2	7	0	10	9	7	5	21	5	6	3	9	11	7	6	9	6	13	14	4	5	18	12	6	9	8	3	5	9	6	15	1	4	10	13	12	12	6	7	8	3	1
ATCAY	0	4	2	2	0	1	7	0	3	3	8	5	9	4	5	6	12	8	5	18	9	25	6	7	7	3	11	9	5	5	10	8	17	8	4	14	17	14	18	3	15	30	21	10	10	6	25	3	5
ATE1	98	206	122	185	163	117	229	220	305	251	126	167	187	205	245	242	214	260	279	252	244	272	215	213	266	202	215	165	263	226	75	112	144	105	79	64	58	91	162	197	156	155	261	187	131	193	211	103	130
ATF1	88	113	60	82	101	49	86	62	96	83	112	89	151	129	175	96	115	179	176	136	106	104	137	85	119	106	190	126	157	149	87	160	168	142	89	72	81	117	166	182	139	164	93	118	80	100	166	82	71
ATF2	619	1309	937	1061	983	691	1846	1236	1550	1881	1324	1616	1995	1738	1052	1316	1438	1574	1721	1456	1075	1244	1431	1239	2218	1786	2573	2211	2094	1864	941	1711	1891	1379	1696	1584	1366	2015	2415	2460	2480	2159	2269	1680	1431	1840	1776	958	980
ATF3	2	8	20	36	13	27	27	17	21	21	6	11	13	19	39	26	31	33	42	36	15	15	12	29	22	20	30	19	10	6	19	29	55	25	15	16	21	24	54	44	30	37	17	17	8	23	2	1	2
ATF4	35	153	88	56	42	67	149	84	162	144	214	214	257	210	330	285	236	297	298	307	211	212	206	167	279	195	248	192	222	197	108	149	213	167	171	189	177	233	342	321	317	378	320	167	203	230	279	121	131
ATF5	0	0	0	0	1	0	2	0	0	0	0	0	0	2	1	0	1	0	0	0	1	0	0	1	0	1	0	0	1	0	1	1	0	0	0	0	0	1	0	0	0	1	0	0	0	0	0	0	0
ATF6	28	155	87	82	63	81	151	96	114	160	183	158	220	130	180	171	158	184	189	187	121	131	128	82	179	169	218	158	201	140	104	159	204	94	142	123	164	172	188	200	182	197	226	235	101	192	177	119	106
ATF6B	8	8	11	12	6	8	22	5	13	11	22	39	33	30	21	20	25	28	21	23	26	20	17	5	31	19	24	26	20	27	24	39	47	30	15	31	36	35	33	46	43	34	27	57	50	56	15	17	13
ATF7	9	28	44	19	10	17	48	13	47	32	97	116	74	79	102	136	91	89	77	97	84	112	84	64	94	65	94	63	89	77	63	135	80	67	84	135	110	85	137	167	107	217	130	95	91	106	144	40	44
ATF7IP	1	32	8	2	19	7	48	10	28	14	22	27	38	24	32	37	30	34	26	28	31	43	26	14	23	31	97	69	40	37	33	56	51	14	40	17	17	19	53	38	71	52	43	50	38	59	50	23	20
ATF7IP2	137	225	93	124	109	93	147	164	170	141	149	119	121	87	134	169	144	189	210	185	94	109	125	128	189	207	195	127	191	193	55	55	132	76	66	60	68	87	131	183	158	151	194	91	72	121	114	87	84
ATG10	1	1	1	2	0	1	3	3	1	2	3	0	3	0	2	1	3	6	1	1	1	0	3	1	2	3	3	5	5	0	1	1	0	6	4	0	7	3	5	2	3	5	2	1	0	3	4	0	3
ATG101	0	18	8	3	8	6	32	5	30	24	66	59	41	47	95	83	43	50	60	51	49	58	54	40	55	58	64	78	32	61	20	38	64	46	31	61	43	46	94	124	100	115	64	85	50	85	77	31	49
ATG12	133	129	80	90	106	81	114	79	113	126	69	105	144	113	169	168	168	144	147	112	97	80	115	113	185	124	226	166	207	169	57	141	132	112	106	94	107	141	169	125	234	181	168	120	118	197	167	78	115
ATG13	0	6	10	10	3	1	8	11	6	11	23	34	28	38	71	31	24	19	32	31	41	43	42	25	42	27	25	33	23	27	29	78	86	36	51	44	31	62	104	74	72	94	52	42	38	24	40	21	24
ATG14	52	86	89	39	34	59	129	56	113	101	182	176	159	216	201	153	139	134	114	89	139	185	143	114	177	137	162	131	175	130	108	220	201	141	101	185	177	183	217	227	208	222	182	168	193	234	168	82	66
ATG16L1	2	16	3	2	1	5	19	3	13	5	15	23	11	11	16	18	33	22	24	15	19	22	21	12	18	15	20	22	11	11	13	18	33	13	23	23	30	37	60	50	58	44	14	22	23	31	17	16	20
ATG16L2	0	2	0	0	0	1	3	0	1	0	5	4	7	0	9	3	8	1	1	2	4	1	0	3	3	8	3	8	4	2	1	5	4	5	8	3	24	8	5	2	7	5	3	1	8	2	4	5	7
ATG2A	0	1	0	1	1	1	4	0	0	0	3	9	2	3	7	1	0	1	9	3	3	8	10	4	2	1	10	6	0	4	5	4	5	5	3	4	1	6	10	11	7	10	2	4	3	8	2	2	3
ATG2B	19	23	13	26	25	46	24	15	38	19	22	24	45	21	40	25	18	29	39	26	18	15	21	20	22	21	25	16	32	30	20	22	22	15	12	2	16	22	18	26	24	56	39	12	16	22	28	8	9
ATG3	64	21	31	49	49	37	75	35	56	73	113	102	126	187	168	131	95	132	126	120	124	169	168	66	212	172	118	122	128	158	108	222	234	159	18	88	218	207	17	315	281	346	39	230	219	359	14	8	8
ATG4A	8	14	8	4	0	2	19	20	22	12	19	14	25	21	20	27	25	27	52	22	10	25	41	25	26	34	26	10	29	27	10	12	17	13	18	12	9	19	25	28	26	30	49	32	11	31	39	11	21
ATG4B	0	1	0	1	0	0	3	0	1	0	0	7	7	6	3	2	4	5	8	3	4	4	9	4	6	5	3	4	2	4	5	4	6	11	2	3	4	5	2	6	13	13	0	6	8	5	3	0	0
ATG4C	37	29	8	6	13	8	17	12	17	18	14	19	27	8	35	19	17	15	21	27	22	17	11	19	22	33	20	17	26	18	8	7	14	17	17	11	15	15	16	20	7	17	26	7	4	20	18	1	14
ATG4D	0	5	1	1	0	1	6	0	1	2	10	7	12	5	7	5	2	1	6	8	2	7	6	3	12	10	4	7	3	10	5	17	8	8	1	6	19	19	7	7	3	18	8	3	16	9	1	2	1
ATG5	114	145	88	120	109	84	179	127	155	183	180	271	359	338	281	237	237	249	230	254	191	232	220	156	374	292	292	245	366	290	286	353	413	283	401	426	393	436	610	583	535	595	490	421	396	489	444	244	265
ATG7	13	51	26	46	21	33	45	28	46	45	37	39	42	34	53	53	50	56	57	68	38	39	47	33	71	58	73	47	33	37	46	62	74	51	24	56	29	44	71	92	92	117	47	80	49	48	77	40	52
ATG9A	0	3	2	1	0	3	0	0	6	3	9	5	3	12	10	7	5	1	4	6	11	5	8	5	2	4	7	5	3	2	20	32	16	8	4	18	15	16	23	31	21	21	3	30	20	22	2	2	1
ATG9B	0	0	1	0	0	0	3	0	0	0	0	0	1	2	0	0	0	0	1	0	0	0	0	1	1	0	0	0	0	0	0	0	0	1	0	0	1	0	0	1	0	0	0	0	0	0	0	2	0
ATIC	32	103	74	45	67	61	122	34	186	153	131	91	160	160	291	280	251	256	331	333	294	313	231	204	182	184	318	219	282	266	75	131	143	91	146	141	125	154	161	177	191	198	202	200	151	196	291	138	118
ATL1	28	19	18	13	24	9	24	13	28	16	14	17	14	15	36	24	24	21	18	26	15	18	16	11	34	33	23	6	32	20	7	28	28	29	11	16	22	19	8	36	18	34	30	14	52	36	24	30	5
ATL2	449	1201	710	565	549	533	1397	983	1094	1042	1270	1504	1630	1520	1147	1245	1190	1418	1259	1062	1228	1364	1167	1160	1636	1331	1913	1402	1955	1797	657	1115	1269	977	798	905	913	1240	1888	1931	1902	1921	1842	1458	1207	1657	1402	958	846
ATL3	40	175	98	92	65	57	181	123	146	141	205	202	259	222	244	249	329	296	290	265	277	221	214	195	359	261	319	245	211	228	183	357	392	242	253	268	285	279	508	558	557	615	422	316	271	364	416	288	286
ATM	25	127	40	39	34	70	109	68	120	97	83	102	127	76	34	75	72	118	93	81	62	62	53	91	85	106	182	81	118	88	22	53	26	44	60	34	25	68	52	68	68	72	136	104	88	65	112	70	20
ATMIN	4	38	16	16	14	23	25	9	42	44	10	11	31	14	58	32	28	41	50	49	13	29	22	19	42	41	34	22	20	24	10	18	28	24	30	20	10	48	42	19	28	52	29	0	12	56	24	6	12
ATN1	0	0	2	2	0	0	4	0	3	2	5	7	2	2	4	3	2	3	7	3	7	2	3	1	2	0	4	1	0	1	1	3	2	2	0	4	2	3	2	0	3	7	2	1	1	4	1	1	2
ATOH1	0	0	0	0	1	0	0	0	0	0	2	0	0	0	2	0	0	0	0	0	0	0	0	1	0	0	0	0	0	0	0	2	0	1	0	1	0	0	1	0	0	0	0	0	0	0	0	0	0
ATOH7	3	15	10	18	22	14	14	9	18	31	2	3	10	5	43	80	24	24	64	63	12	12	18	25	15	28	44	47	21	8	18	12	104	79	9	2	12	46	16	15	19	61	21	9	4	38	3	5	6
ATOH8	0	0	0	0	0	0	0	0	0	0	0	0	0	0	0	0	0	0	0	0	0	0	0	0	0	0	0	0	0	0	0	0	0	0	0	0	0	0	0	0	0	0	0	0	0	0	0	0	0
ATOX1	3	3	4	14	12	9	7	9	8	11	14	15	17	11	17	8	7	14	21	12	4	4	10	12	21	16	19	10	6	12	5	2	3	1	1	6	8	6	8	6	14	4	6	5	7	9	4	5	3
ATP10A	0	3	1	3	3	1	7	1	6	0	8	5	6	4	3	7	6	9	19	10	4	6	14	3	13	5	6	14	5	5	8	18	13	17	0	11	15	18	7	46	16	39	1	6	8	22	5	7	1
ATP10B	0	8	1	1	0	1	8	3	1	0	6	13	6	7	6	13	15	10	15	7	6	8	14	5	18	2	7	4	2	5	7	10	9	21	2	3	10	6	22	47	11	29	11	7	16	8	7	10	4
ATP10D	198	293	220	334	211	232	256	266	336	267	377	399	372	278	309	316	297	385	465	345	308	343	285	255	479	399	481	330	373	295	186	288	379	207	263	262	273	327	417	415	457	474	414	317	345	431	228	214	148
ATP11A	40	29	31	61	30	27	24	40	48	35	44	91	68	35	83	62	63	53	77	76	68	70	51	30	93	85	99	86	79	68	83	128	103	80	99	121	176	127	154	138	140	161	111	132	140	134	72	72	51
ATP11B	213	363	243	260	267	272	326	346	345	292	320	368	291	271	375	265	293	332	261	306	231	293	216	253	297	239	451	252	495	323	174	316	243	228	159	270	259	225	201	305	390	357	317	259	271	329	232	98	95
ATP11C	95	138	87	133	87	101	150	166	127	196	160	182	156	141	99	127	77	133	145	134	110	81	114	123	164	130	162	90	211	176	87	166	110	75	118	75	91	108	212	195	156	209	138	112	99	132	167	83	57
ATP12A	0	20	19	27	15	13	34	18	19	25	17	29	36	12	18	23	25	23	30	49	22	6	16	20	27	20	32	24	4	12	4	22	27	16	17	17	16	24	47	39	43	23	34	12	16	21	37	16	40
ATP13A1	1	4	3	1	2	0	3	1	3	4	10	9	10	6	23	6	6	5	1	10	4	7	6	6	12	4	7	7	4	5	4	9	18	8	21	13	11	12	19	15	30	23	9	14	31	22	10	4	4
ATP13A2	0	0	0	0	0	1	0	0	0	0	0	0	0	3	0	0	1	1	0	0	0	0	0	0	0	0	1	0	0	0	0	2	2	0	0	0	1	2	0	3	0	4	0	0	0	0	0	0	0
ATP13A3	30	106	55	60	83	64	66	97	82	69	93	82	45	32	54	48	45	39	62	83	44	43	35	58	60	58	124	91	109	83	7	23	27	18	10	11	10	35	31	4	23	19	30	36	10	46	17	34	15
ATP13A4	0	0	0	0	0	0	0	0	0	0	0	0	0	0	0	0	0	0	0	1	0	0	0	0	0	0	0	2	0	0	0	0	0	0	0	0	0	0	0	0	0	0	3	0	0	0	4	0	1
ATP13A5	12	11	6	12	20	19	21	16	9	11	8	15	10	6	2	12	13	12	17	13	8	19	10	20	6	6	27	27	14	23	4	7	21	6	8	6	6	10	15	17	14	16	25	27	11	4	4	4	1
ATP1A1	9	63	39	38	11	26	69	36	64	54	136	161	190	199	300	261	310	321	353	357	248	313	390	223	210	167	216	187	115	118	287	492	552	359	305	542	463	425	920	1001	830	909	396	382	351	492	375	247	204
ATP1A2	0	0	0	0	0	0	0	0	0	0	0	0	0	0	0	0	0	0	0	0	0	0	0	0	0	0	0	0	0	0	0	0	0	0	0	0	0	0	0	0	0	0	0	0	0	0	0	0	0
ATP1A3	0	0	0	0	0	0	0	1	0	0	0	0	0	0	0	0	1	2	1	1	0	0	0	0	2	3	4	0	4	2	1	0	0	1	1	1	4	1	2	0	0	0	0	2	6	1	0	2	0
ATP1A4	0	0	0	0	0	0	0	0	0	0	0	0	0	0	0	0	0	0	0	0	0	0	0	0	0	0	0	0	0	0	0	0	0	0	0	0	0	0	0	0	0	0	0	0	0	0	0	0	0
ATP1B1	1	9	4	3	1	3	7	5	10	7	31	32	25	12	22	26	23	19	32	21	21	12	11	16	22	20	21	17	20	23	6	5	11	13	7	6	5	10	16	23	8	18	13	7	7	31	8	12	6
ATP1B2	0	0	0	0	0	0	0	0	0	0	0	0	0	0	0	0	0	0	0	0	0	0	0	0	0	0	0	0	0	0	0	0	0	0	0	0	0	0	0	0	0	0	0	0	0	0	0	0	0
ATP1B3	4	22	11	26	14	33	39	18	26	26	10	23	30	18	45	48	47	31	40	43	15	20	23	29	44	48	49	42	19	35	15	43	36	29	19	26	38	54	19	48	59	59	24	30	27	52	7	6	2
ATP1B4	0	0	0	0	0	0	0	0	0	0	0	0	0	0	0	0	0	0	0	0	0	0	0	0	0	0	0	0	0	0	0	0	0	0	0	0	0	0	0	0	0	0	0	0	1	0	0	0	0
ATP23	3	0	1	5	4	2	1	0	5	3	3	6	0	1	3	4	0	3	2	2	0	1	1	4	0	2	0	1	0	5	1	0	1	0	0	0	0	0	2	4	0	1	0	1	3	2	0	0	0
ATP2A1	0	0	0	0	0	0	0	0	0	0	0	0	0	0	0	0	0	0	0	0	0	0	0	0	0	0	0	0	2	0	0	0	0	0	0	0	0	0	0	0	0	0	0	0	0	0	0	2	0
ATP2A2	210	327	255	355	183	275	461	243	356	406	360	334	401	316	461	223	375	409	421	355	205	194	265	219	387	317	492	428	411	348	175	276	333	196	193	257	237	294	335	375	449	457	411	291	158	351	376	189	199
ATP2A3	0	0	0	0	0	0	0	0	0	0	0	0	0	0	0	0	0	0	0	0	0	0	0	0	0	0	0	0	0	0	0	0	0	0	0	0	0	0	0	0	0	0	0	0	0	0	0	0	0
ATP2B1	126	176	128	137	136	89	255	123	199	223	264	266	342	255	377	285	269	317	430	311	236	262	221	251	431	344	349	273	377	328	144	266	359	211	121	144	161	216	251	260	310	315	268	231	223	270	192	142	98
ATP2B2	0	0	0	0	0	0	0	0	0	0	0	0	0	0	0	0	0	0	0	0	0	0	0	0	0	0	0	0	1	0	0	0	0	0	0	0	0	0	0	0	0	0	0	0	0	0	0	0	0
ATP2B3	0	0	0	0	0	0	1	1	0	0	0	0	0	0	0	0	0	0	0	0	0	0	0	0	0	0	0	0	0	0	0	1	0	0	0	0	0	0	0	0	0	0	0	0	0	0	0	0	0
ATP2B4	22	29	43	10	24	18	43	16	19	39	29	28	25	10	42	59	49	33	71	77	38	38	18	49	21	15	26	7	23	28	24	24	26	25	30	25	31	29	60	59	72	68	74	28	43	40	36	23	29
ATP2C1	49	109	72	95	86	102	150	109	173	168	120	92	120	67	141	89	94	112	117	105	77	73	61	65	80	98	126	109	141	131	59	111	102	59	54	57	71	76	79	84	87	125	99	104	79	85	112	44	20
ATP2C2	0	2	2	5	0	6	8	1	11	1	17	18	30	34	22	25	28	15	26	20	21	11	17	9	19	27	20	29	11	23	16	20	31	20	23	45	55	44	89	107	76	95	14	49	34	54	9	12	6
ATP4A	0	0	0	1	0	0	0	0	0	0	0	0	0	0	0	1	0	0	0	2	1	0	0	0	0	0	0	2	1	0	1	0	0	0	0	0	0	0	1	2	0	1	1	0	0	0	1	0	0
ATP4B	0	0	0	0	0	0	0	0	0	0	0	0	0	0	0	0	0	0	0	0	0	0	0	0	0	0	0	0	0	0	0	0	0	0	0	0	0	0	0	0	0	0	0	0	0	0	0	0	0
ATP5F1A	228	431	246	474	104	354	496	180	483	437	696	842	1051	920	757	814	669	836	863	827	651	642	749	571	952	723	890	739	870	803	507	827	1015	700	585	672	634	801	1299	1227	1362	1284	1269	1027	696	1121	941	483	492
ATP5F1B	90	178	103	109	86	90	240	78	206	94	321	390	347	354	419	380	274	209	262	232	352	324	275	230	383	302	437	367	415	459	169	305	361	246	209	186	214	287	436	393	371	330	535	480	411	538	355	199	218
ATP5F1C	174	341	126	459	380	375	271	289	301	353	189	212	402	315	423	366	235	322	382	300	151	131	218	220	400	298	419	332	326	350	220	312	433	321	297	287	307	409	562	613	677	580	410	318	213	331	309	176	149
ATP5F1D	4	14	15	25	9	15	34	11	16	33	34	30	37	28	59	39	54	60	63	54	30	38	32	27	25	16	46	26	23	28	17	12	46	31	6	5	6	28	58	54	35	41	20	16	12	17	35	11	19
ATP5F1E	53	44	32	102	51	76	65	76	47	52	39	62	35	30	70	60	48	58	70	55	36	53	24	39	33	23	45	44	29	38	7	13	14	10	3	3	2	7	7	17	7	10	28	10	10	21	18	6	7
ATP5IF1	91	49	50	183	115	139	83	92	73	86	51	68	75	64	55	66	49	101	118	97	34	31	41	41	78	74	83	68	49	52	19	27	48	24	16	25	22	49	68	40	62	65	53	41	21	40	58	35	27
ATP5MC1	4	67	57	127	84	130	75	72	82	84	57	51	71	35	79	67	50	44	59	84	17	41	42	54	57	43	96	71	77	100	16	23	31	21	14	31	13	28	51	46	38	42	57	33	23	39	21	18	17
ATP5MC2	26	60	65	62	60	55	99	123	47	52	30	51	34	27	57	38	42	40	57	57	15	14	23	30	55	44	51	54	39	41	11	19	16	10	13	16	10	20	32	40	53	43	34	10	9	20	38	14	16
ATP5MC3	546	272	163	466	678	600	314	373	329	329	232	215	228	144	313	312	148	199	277	252	94	120	138	174	167	185	234	204	381	426	59	92	126	80	147	70	100	110	190	214	219	215	230	144	92	207	165	106	99
ATP5MD	75	77	52	210	138	172	88	136	79	81	16	25	42	28	42	36	37	37	46	41	27	19	23	29	34	33	93	44	37	35	8	15	26	20	10	7	15	17	25	35	28	32	39	16	12	38	26	9	13
ATP5ME	17	8	2	28	18	29	15	19	16	19	6	10	15	10	16	9	8	11	16	10	8	5	5	6	12	11	17	16	8	11	0	2	9	3	8	0	2	5	4	10	8	4	8	6	4	5	7	8	1
ATP5MF	11	14	33	56	23	49	34	49	26	23	23	32	26	14	22	17	16	38	31	26	19	23	23	25	17	13	41	24	21	22	3	6	20	8	6	7	2	6	19	14	13	15	13	6	5	11	14	5	4
ATP5MG	299	52	72	163	225	108	104	83	136	117	62	73	94	65	52	88	52	71	73	76	29	52	49	43	104	89	110	80	159	196	18	22	52	35	35	28	38	60	51	58	51	68	52	49	35	47	46	24	23
ATP5MPL	6	25	17	25	34	37	15	19	13	18	1	5	12	4	12	7	17	6	4	10	1	1	10	4	5	9	15	11	10	9	2	2	4	4	2	1	1	4	6	3	6	6	8	1	1	5	2	4	0
ATP5PB	728	343	337	606	606	423	513	538	505	570	403	510	436	341	469	505	274	393	563	426	253	308	341	304	526	461	491	376	744	711	124	216	317	219	202	187	209	343	334	378	453	395	508	308	228	305	413	234	209
ATP5PD	11	67	40	110	49	93	73	68	60	75	64	57	68	47	40	40	47	72	61	50	44	67	33	41	40	72	57	56	49	44	15	12	16	15	13	9	14	13	26	21	32	32	42	33	28	35	22	15	20
ATP5PF	1481	553	476	1082	1376	905	425	514	940	905	422	504	600	470	624	645	439	494	753	596	294	378	401	421	606	574	727	543	887	936	175	276	381	246	227	264	299	402	451	505	478	539	490	319	222	455	447	279	244
ATP5PO	296	138	83	301	214	308	116	144	139	144	86	88	138	88	97	109	86	100	140	146	56	81	83	76	126	114	156	146	135	112	37	59	80	43	49	36	46	51	71	98	93	98	98	55	46	82	99	55	52
ATP5S	17	36	19	62	32	38	45	33	16	30	16	25	24	18	43	34	31	51	34	29	18	23	21	16	26	22	46	34	17	20	14	47	49	30	19	23	19	39	54	93	65	86	29	23	27	34	61	20	20
ATP6AP1	0	4	1	1	0	1	6	9	0	5	3	2	7	14	16	3	8	8	9	7	11	3	8	4	4	6	6	6	4	4	16	21	31	14	7	12	12	9	24	30	32	31	18	6	5	16	4	1	11
ATP6AP1L	0	3	5	1	2	3	3	0	1	0	3	2	0	1	3	3	0	1	4	0	1	2	0	2	5	2	7	1	2	6	0	1	2	3	0	0	0	2	3	10	7	2	2	2	0	0	1	0	2
ATP6AP2	58	223	60	122	101	121	188	124	158	137	95	125	185	176	277	288	207	232	186	149	148	152	197	138	153	166	250	284	196	175	187	308	353	330	270	318	283	313	375	338	313	381	282	140	226	378	320	160	169
ATP6V0A1	4	37	18	14	18	13	41	19	30	44	65	81	94	81	87	85	78	72	87	84	70	75	106	54	137	101	94	73	72	70	91	160	167	126	89	125	126	111	241	214	210	209	106	164	160	120	102	82	60
ATP6V0A2	11	23	21	22	14	21	28	22	31	30	36	63	59	76	76	42	34	43	28	36	35	52	28	33	78	56	79	42	63	69	41	106	108	58	6	52	85	60	20	91	135	124	30	50	110	79	33	13	18
ATP6V0A4	2	5	3	4	3	2	8	10	5	3	15	7	13	6	12	19	11	1	12	14	10	8	18	17	16	6	10	13	20	9	6	16	9	12	17	16	21	33	16	4	23	22	35	19	7	25	20	5	2
ATP6V0B	12	83	41	38	24	35	70	54	110	49	80	152	117	119	172	91	83	80	145	106	72	88	77	50	150	148	141	92	166	215	47	61	93	50	34	37	37	44	105	101	113	82	141	102	72	103	83	59	42
ATP6V0C	2	20	12	18	4	23	33	6	24	23	69	66	55	79	89	79	59	37	80	75	47	51	61	37	50	55	48	48	55	51	22	46	59	46	31	50	40	73	74	63	104	75	56	29	34	49	35	39	46
ATP6V0D1	2	41	28	17	6	8	65	25	54	51	118	159	148	128	147	127	117	97	157	129	115	97	119	61	152	107	112	89	103	142	81	88	148	94	68	64	71	115	168	191	204	184	119	101	96	137	123	80	82
ATP6V0D2	0	0	0	0	0	0	0	0	0	0	0	0	0	0	0	0	0	0	0	0	0	0	0	0	1	0	0	0	0	0	0	0	0	0	0	0	0	0	0	0	0	0	0	0	0	0	0	0	0
ATP6V0E1	37	120	77	136	103	124	110	101	153	149	105	120	130	103	180	171	128	99	159	143	88	95	121	92	174	106	144	146	91	122	59	91	129	79	93	96	88	156	161	205	199	201	155	67	65	98	105	73	65
ATP6V0E2	0	1	0	0	0	0	0	0	0	0	1	0	2	0	3	0	0	0	0	2	5	0	0	1	0	0	10	0	0	1	2	0	3	2	2	4	2	2	2	3	0	0	0	0	3	0	0	0	0
ATP6V1A	22	131	86	38	32	42	114	56	103	90	106	130	136	105	137	125	74	124	163	143	107	157	93	72	111	101	194	126	130	103	71	93	98	82	54	56	57	68	117	108	159	129	141	65	119	136	81	57	40
ATP6V1B1	5	10	0	4	5	4	0	7	2	1	2	1	14	16	8	3	1	5	6	1	5	3	6	2	10	1	6	3	8	11	16	27	30	20	20	22	33	21	34	14	13	7	29	35	11	50	3	1	2
ATP6V1B2	40	183	144	107	90	99	190	54	254	204	312	442	484	459	547	412	394	374	457	413	467	555	618	286	455	398	441	379	328	380	463	799	820	622	715	753	661	752	1136	1408	1239	1181	770	744	567	806	755	389	360
ATP6V1C1	296	583	340	421	323	514	775	641	563	595	812	779	814	756	924	863	616	715	735	706	631	744	810	550	761	744	865	724	1142	1160	556	868	867	710	593	681	712	786	1225	1203	1320	1194	960	805	622	904	749	424	378
ATP6V1C2	17	8	6	21	9	12	10	2	9	8	4	8	15	6	13	12	7	4	7	9	3	2	2	3	10	15	8	5	9	5	0	3	4	2	1	2	3	7	12	5	9	5	6	0	1	6	2	5	6
ATP6V1D	1	11	2	9	1	27	17	7	9	14	8	10	9	14	9	8	4	14	18	12	4	11	9	9	11	8	8	7	12	6	5	4	21	7	9	8	9	9	11	4	14	20	16	6	6	11	8	6	3
ATP6V1E1	7	84	28	67	30	63	70	66	64	65	61	48	85	53	71	95	109	136	167	153	41	39	77	52	89	86	73	79	36	69	49	88	124	63	87	71	95	120	172	162	152	128	65	47	25	57	117	88	75
ATP6V1E2	0	0	0	0	0	0	0	0	0	0	0	0	0	0	0	0	0	0	0	0	0	0	0	0	0	0	0	0	0	0	0	0	0	0	0	0	0	0	0	0	0	0	0	0	0	0	0	0	0
ATP6V1F	9	30	37	91	52	49	28	28	59	49	52	44	40	26	38	29	36	37	33	40	12	21	23	22	33	27	74	72	12	18	21	18	33	30	13	13	16	24	38	48	54	57	41	25	19	38	14	11	12
ATP6V1FNB	0	1	0	0	0	0	0	0	0	0	0	1	0	0	0	1	1	2	0	0	0	1	0	0	0	0	1	1	1	1	0	0	0	0	0	0	0	1	1	3	0	1	0	0	1	1	0	0	0
ATP6V1G1	193	378	113	308	267	349	214	279	344	289	260	223	313	233	257	261	206	260	238	192	109	123	196	166	263	246	341	347	411	389	138	215	279	195	223	238	238	359	325	368	345	347	518	280	224	383	260	163	139
ATP6V1G2	0	0	0	0	0	0	0	0	0	1	2	0	0	0	0	1	0	0	0	1	2	0	0	0	1	0	0	0	0	0	0	0	0	2	0	0	0	0	0	0	0	0	0	0	0	0	0	0	0
ATP6V1G3	0	0	0	0	0	0	0	0	0	0	0	0	0	0	0	0	0	0	0	0	0	0	0	0	0	0	0	0	0	0	0	0	0	0	0	0	0	0	0	0	0	0	0	0	0	0	0	0	0
ATP6V1H	39	94	68	69	62	103	87	59	120	70	85	86	160	136	92	138	85	152	113	126	79	86	108	71	162	144	177	126	101	136	71	103	140	84	93	115	100	140	178	139	152	140	162	131	95	142	130	47	51
ATP7A	3	14	8	6	7	7	24	12	26	14	16	19	29	22	7	13	28	22	15	12	4	11	20	19	28	24	44	7	13	39	6	30	21	14	19	32	16	18	33	20	24	50	20	5	17	27	46	16	14
ATP7B	0	1	0	4	1	1	2	1	7	0	6	1	0	3	6	5	0	5	3	4	3	8	2	1	3	3	5	2	0	0	10	15	5	4	5	10	9	4	25	15	11	19	7	17	7	3	1	11	4
ATP8A1	26	48	34	24	22	35	64	46	57	33	50	38	50	44	59	56	38	44	77	45	38	34	50	17	34	32	56	44	54	28	13	45	33	38	25	28	61	38	31	58	41	63	74	50	75	100	50	18	32
ATP8A2	0	0	0	0	0	0	0	0	0	0	0	0	0	0	0	0	0	0	0	0	0	0	0	0	0	0	0	0	0	0	0	0	0	0	0	0	0	0	0	0	0	1	0	0	0	0	0	0	0
ATP8B1	12	22	29	27	18	49	42	22	37	40	31	32	72	47	49	52	38	34	31	19	25	19	42	38	63	56	38	27	48	53	16	33	40	36	38	33	56	47	44	91	54	49	29	19	22	43	47	17	19
ATP8B2	0	1	0	0	0	0	1	0	1	0	0	3	3	1	3	1	1	4	0	4	0	4	0	0	3	3	0	4	4	0	0	3	4	2	1	1	6	7	1	2	7	11	0	0	2	12	0	2	0
ATP8B3	0	0	0	0	0	0	0	0	0	0	0	0	0	0	0	0	0	0	0	0	0	0	0	0	0	0	0	0	0	0	0	0	0	0	0	0	0	0	0	0	0	0	0	0	0	0	0	0	0
ATP8B4	4	29	15	12	9	20	30	10	31	17	27	20	23	20	25	19	16	39	36	23	16	37	12	23	13	20	30	11	35	25	22	24	39	22	30	21	30	36	48	46	41	57	21	17	24	22	33	21	16
ATP9A	2	13	10	8	8	6	8	4	16	11	18	34	15	7	53	26	35	25	42	42	30	25	27	20	1	12	14	21	14	8	24	46	28	37	36	42	32	29	59	86	78	60	16	38	29	21	7	8	5
ATP9B	4	18	10	21	9	13	16	20	21	23	18	29	31	16	16	24	23	34	34	26	9	16	22	27	25	35	30	17	25	23	19	24	37	19	13	15	22	31	51	44	63	45	35	14	12	24	37	13	11
ATPAF1	20	26	18	23	26	19	50	36	45	43	46	44	25	42	81	51	32	52	57	49	28	21	62	27	38	27	93	48	31	45	13	77	90	83	22	19	81	79	23	41	100	163	33	20	41	137	17	21	32
ATPAF2	2	12	2	4	5	9	12	2	12	9	20	15	18	22	30	27	15	21	14	27	14	20	17	20	21	22	19	27	30	30	10	20	20	15	13	30	12	20	33	23	30	25	28	20	16	22	25	22	20
ATR	48	42	37	49	25	13	93	35	70	58	53	65	69	28	33	48	35	59	73	45	39	45	17	48	65	56	73	38	100	47	10	20	26	20	5	11	29	22	51	54	50	35	32	57	47	62	50	21	17
ATRAID	85	128	89	187	335	147	128	191	191	209	165	202	227	190	175	168	117	119	109	122	73	115	67	67	237	213	273	254	316	385	68	82	111	71	78	92	70	85	163	160	178	150	189	120	96	150	87	92	61
ATRIP	4	14	9	4	3	3	7	4	12	7	19	16	27	17	14	11	19	21	27	26	20	18	23	24	30	22	24	13	12	15	8	19	43	15	8	10	22	20	43	40	37	50	30	12	9	26	18	6	10
ATRN	10	11	18	6	5	9	31	12	14	13	20	27	24	24	38	25	36	20	27	17	10	15	15	17	33	14	18	10	22	15	17	39	12	10	14	21	16	25	40	32	32	31	8	14	19	33	29	3	7
ATRNL1	7	9	16	5	23	5	11	7	23	21	3	9	15	7	10	6	8	12	4	18	15	12	9	7	10	10	2	6	18	39	5	16	11	11	21	10	5	22	10	16	11	15	7	7	3	7	14	1	6
ATRX	312	843	515	523	321	417	1029	467	1055	928	1184	1076	1113	887	1027	851	1009	1203	1401	1091	939	999	947	933	947	845	1357	996	1644	1485	381	537	565	374	432	389	327	538	765	718	850	628	1466	917	852	1113	813	469	465
ATXN1	1	8	4	3	10	5	10	5	7	11	15	19	24	12	28	18	16	24	16	16	21	22	11	10	32	22	33	23	9	23	30	29	29	12	19	19	42	33	13	49	39	36	19	21	30	45	10	6	1
ATXN10	1	13	8	8	15	11	20	5	27	25	8	7	14	31	64	50	13	24	65	61	10	15	45	32	47	58	58	66	87	101	6	30	124	85	5	14	12	124	17	11	59	152	33	19	31	139	8	4	2
ATXN1L	3	5	8	15	12	9	19	18	36	12	17	29	23	27	44	32	24	13	33	11	15	4	17	11	24	19	32	26	26	32	16	30	19	20	22	30	33	29	26	20	32	22	28	34	22	35	20	12	9
ATXN2	17	95	69	53	26	30	95	53	99	109	122	123	88	72	82	108	102	128	117	110	72	88	60	88	146	114	166	109	117	103	42	71	184	133	66	66	81	102	190	197	181	184	111	97	56	145	110	58	79
ATXN2L	4	14	12	5	7	7	13	8	18	6	27	23	24	25	82	56	25	22	48	37	27	33	45	27	24	30	40	29	35	40	32	47	42	41	17	62	45	60	41	67	52	89	44	45	39	84	23	11	8
ATXN3	90	193	168	128	103	115	191	159	220	224	207	249	237	158	175	154	176	242	231	201	142	147	166	154	283	254	294	255	227	167	87	167	222	156	176	104	133	210	254	261	295	265	313	233	158	241	321	184	142
ATXN7	9	20	33	24	9	18	36	18	41	28	45	27	33	50	34	39	31	41	35	38	27	30	16	28	42	37	35	29	29	27	24	39	36	39	20	46	36	24	88	68	52	69	38	40	20	20	37	12	15
ATXN7L1	81	206	111	166	141	173	183	145	312	272	256	294	315	244	322	337	448	469	476	386	343	317	243	224	340	313	388	254	271	275	339	600	543	403	526	621	525	529	850	879	711	855	390	283	294	351	412	205	241
ATXN7L2	0	5	12	2	4	5	18	12.37	19.17	6	18.08	49	54	59.83	31.09	31.03	38	27.33	33.02	32	23.06	22.12	44	16	53	33	30.05	32.59	21	30	46.75	112	90.09	74	35.32	41.07	73.24	73	104	118.87	104.92	137.62	24	62.08	47	85.67	45	20	36
ATXN7L3	0	0	0	0	0	0	0	0	1	1	0	0	0	0	2	0	0	0	0	0	0	0	0	0	0	3	0	3	0	0	1	0	0	0	0	0	0	0	0	2	0	0	0	0	0	0	0	0	0
ATXN7L3B	15	37	41	19	15	10	54	48	81	54	137	134	25	37	121	97	92	79	48	70	25	43	37	41	109	77	112	89	56	55	39	86	55	62	51	67	66	67	59	62	54	46	60	79	55	76	42	14	18
AUH	7	12	3	9	12	4	15	9	10	13	17	19	26	37	22	41	30	32	54	48	22	34	26	26	39	52	33	14	28	40	27	32	85	45	54	18	26	48	67	83	49	54	20	22	21	13	11	13	17
AUNIP	98	158	55	107	53	146	114	82	112	101	171	173	136	128	190	165	201	229	283	191	109	188	159	95	195	211	211	207	134	114	99	197	218	166	164	170	163	254	304	271	271	275	240	158	124	149	284	193	163
AUP1	0	0	1	0	0	0	1	0	0	1	2	0	7	1	2	1	0	1	3	0	0	1	0	1	0	0	0	2	0	0	0	1	5	0	2	3	0	1	5	8	9	4	9	0	2	2	1	1	0
AURKA	2315	5863	2903	3679	2616	2878	7185	4337	6552	6584	8727	11130	13020	11259	9978	10133	10687	12297	14824	12564	8264	9898	9602	7517	12636	10576	11601	10057	10521	12191	7623	12983	15934	11350	8489	10303	10112	13367	19978	21316	19918	21555	14868	11302	8590	13652	15175	8159	7780
AURKAIP1	7	6	3	9	5	13	4	7	11	16	15	23	17	16	24	21	14	13	11	16	17	6	9	7	21	13	18	7	14	24	7	5	10	12	4	11	3	9	12	6	9	10	15	18	15	10	11	8	1
AURKB	32	169	108	113	109	60	175	86	281	284	105	149	179	130	196	162	222	239	248	213	155	179	227	108	188	203	233	174	126	120	97	144	195	121	118	162	166	206	257	280	251	311	194	169	116	193	261	162	101
AURKC	339	759	640	358	241	298	1007	739	1040	827	1323	1696	1276	1103	1686	1475	1261	1377	1471	1299	1614	1687	1532	1133	1401	1264	1781	1436	1459	1766	508	867	1105	786	756	834	747	1141	1182	1328	1335	1315	1559	1304	825	1423	1245	673	593
AUTS2	4	3	3	14	4	3	17	11	13	10	10	19	11	5	25	15	14	10	14	10	7	5	6	2	10	10	9	5	15	16	1	11	7	5	9	0	3	4	7	21	6	9	1	3	10	10	3	3	4
AVEN	41	118	57	84	62	100	93	76	106	124	133	151	100	82	174	191	212	216	284	229	109	132	119	147	102	97	113	92	108	99	32	81	89	63	41	54	77	93	98	136	134	127	184	103	85	127	94	41	38
AVIL	2	0	2	4	6	3	2	0	4	5	1	0	0	6	1	0	2	6	7	4	0	7	0	0	13	8	3	0	0	7	4	0	0	0	2	5	5	4	4	0	6	15	4	2	6	6	8	0	0
AVL9	10	49	45	32	25	43	48	61	81	24	40	62	61	59	115	66	42	79	44	46	57	62	51	55	70	57	59	76	73	89	40	139	89	59	108	88	100	84	143	97	118	142	90	85	72	106	57	41	32
AVP	0	0	0	0	0	0	0	0	0	0	0	0	0	0	0	0	0	0	0	0	0	0	0	0	0	0	0	0	0	0	0	0	0	0	0	0	0	0	0	0	0	0	0	0	0	0	0	0	0
AVPI1	0	3	7	2	2	3	7	4	5	5	3	6	5	2	2	5	7	7	10	6	5	2	9	3	5	4	5	3	3	4	6	8	16	2	2	3	4	3	12	15	11	21	6	3	2	2	5	5	3
AVPR1A	0	0	0	0	0	0	0	0	0	0	0	0	0	0	0	0	0	0	0	0	0	0	0	0	0	0	0	0	0	0	0	0	0	0	0	0	0	0	0	0	0	0	0	0	0	0	0	0	0
AVPR1B	0	0	0	0	0	1	0	0	0	0	0	0	2	0	1	3	0	1	1	0	0	0	0	0	3	0	1	3	0	0	3	5	1	0	1	0	2	1	14	8	6	11	0	0	0	1	4	1	1
AVPR2	0	0	0	0	0	0	0	0	0	0	0	0	0	0	0	0	0	0	0	0	0	0	0	0	0	0	0	0	0	0	0	0	0	0	0	0	0	0	0	0	0	0	0	0	0	0	0	0	0
AWAT1	0	0	0	0	0	0	0	0	1	0	0	0	1	0	1	0	0	1	0	0	0	0	0	0	0	0	0	0	0	0	0	1	0	0	0	0	0	0	0	0	0	0	0	0	0	0	2	0	0
AWAT2	0	0	0	0	0	0	0	0	0	0	0	0	0	0	0	0	0	0	0	0	0	0	0	0	0	0	0	0	0	0	0	0	0	0	0	0	0	0	0	0	0	0	0	0	0	0	0	0	0
AXDND1	83	160	101	141	209	164	214	227	140	164	141	134	91	88	123	133	126	140	144	141	120	164	98	105	72	76	165	173	90	102	35	51	87	67	39	40	67	72	88	85	111	111	107	76	76	115	95	45	38
AXIN1	2	6	8	4	0	2	15	2	6	7	15	37	13	8	28	16	12	13	10	7	17	15	16	5	15	11	14	18	12	19	3	13	12	5	7	23	20	11	5	10	8	17	16	18	15	15	0	3	3
AXIN2	1	2	4	3	0	1	2	2	6	3	10	11	5	8	18	11	7	13	8	7	7	13	4	5	9	9	6	5	6	3	7	12	12	10	12	11	10	8	8	29	15	32	9	6	5	12	11	4	3
AXL	0	0	1	2	0	0	0	0	0	0	0	0	0	0	0	0	0	0	4	3	0	0	0	1	0	0	0	0	0	3	0	0	0	0	0	3	0	0	0	0	0	0	0	0	0	0	0	0	7
AZGP1	0	0	0	1	0	0	1	0	0	1	0	0	2	0	2	0	1	0	2	0	0	0	0	1	4	0	0	1	0	5	1	1	0	3	1	0	0	0	1	0	0	0	1	3	0	2	0	0	2
AZI2	36	40	28	61	25	47	39	40	36	52	67	62	90	66	102	91	93	77	95	68	67	67	72	48	89	86	106	106	74	110	51	81	127	69	62	67	121	119	68	105	91	140	128	147	83	133	35	29	57
AZIN1	127	142	123	128	102	86	242	139	167	151	258	318	345	316	234	200	200	190	188	182	243	291	233	178	247	206	236	212	300	257	141	215	234	160	274	212	250	321	328	289	347	346	246	258	233	290	266	177	122
AZIN2	6	15	6	5	7	3	15	5	19	12	29	35	28	24	94	31	26	41	44	41	35	49	64	26	42	25	44	40	32	50	26	27	43	29	34	50	52	38	47	51	56	61	43	54	55	91	32	26	33
AZU1	2	1	0	0	0	0	0	0	3	0	5	5	3	7	3	6	6	3	2	3	2	5	2	4	1	1	5	8	7	2	3	3	3	2	2	2	3	1	0	4	1	5	5	7	2	3	4	3	4
ApoN	0	0	0	0	0	0	0	0	0	0	0	0	0	0	0	0	0	0	0	0	0	0	0	0	0	0	0	0	0	0	0	0	0	0	0	0	0	0	0	0	0	0	0	0	0	0	0	0	0
B2M	199	268	112	284	359	358	153	252	165	142	153	147	134	121	163	173	62	73	140	98	36	34	75	70	131	118	299	241	345	308	39	76	117	78	73	60	51	78	136	124	143	117	173	73	65	98	105	59	54
B3GALNT1	3	6	1	3	9	3	5	0	0	1	1	8	0	4	2	4	0	3	4	3	2	1	1	3	0	3	4	13	3	6	3	2	0	0	2	0	1	2	2	0	1	0	2	0	3	1	1	0	0
B3GALNT2	105	217	118	48	51	48	193	115	198	206	421	446	289	322	424	429	331	322	403	381	358	383	499	279	340	286	350	375	360	465	187	345	337	321	186	207	334	325	349	521	527	474	375	457	487	660	289	193	176
B3GALT1	2	7	3	11	3	0	8	3	10	4	6	2	8	11	13	6	4	10	22	6	5	18	10	6	14	5	9	6	9	3	14	27	11	11	1	18	15	10	19	28	31	37	10	11	2	3	12	8	1
B3GALT2	0	0	0	0	0	0	0	0	0	0	0	0	0	0	0	0	0	0	0	0	0	0	0	0	0	0	0	0	0	0	0	0	0	0	0	0	0	0	0	0	0	0	0	0	0	0	0	0	0
B3GALT4	0	0	0	0	0	0	1	1	1	0	1	3	2	1	0	2	2	0	0	3	0	3	3	0	2	1	0	1	0	6	1	0	0	1	0	0	1	1	0	0	0	1	0	1	2	0	0	3	0
B3GALT5	0	0	0	0	0	0	0	0	0	0	0	0	0	0	0	0	0	0	0	0	0	0	0	0	0	0	0	0	0	0	0	0	0	0	0	0	0	0	0	0	0	0	0	0	0	0	0	0	0
B3GALT6	0	12	5	6	3	6	2	2	4	10	4	4	14	12	4	3	15	3	11	17	6	2	8	2	12	7	5	7	11	9	9	7	7	6	8	5	7	11	9	4	12	12	17	2	6	9	7	6	5
B3GAT1	0	0	0	0	0	0	0	0	0	0	0	0	2	0	0	0	0	0	0	0	0	0	0	0	0	0	0	0	0	0	0	0	0	0	0	0	0	0	0	0	0	0	0	0	1	0	0	0	0
B3GAT2	0	0	0	0	0	0	0	0	0	0	0	0	0	0	0	0	0	0	0	0	0	0	0	0	0	0	1	0	0	0	0	0	0	2	0	0	0	0	0	0	0	0	0	0	0	0	0	0	0
B3GAT3	0	0	0	1	0	0	0	1	0	0	2	0	5	1	0	4	0	0	4	0	1	1	1	0	1	1	0	0	0	1	0	3	0	3	0	0	2	2	1	0	1	3	1	2	0	0	1	0	0
B3GNT2	2	16	3	3	2	5	14	1	13	2	1	1	5	4	11	12	6	4	6	5	11	5	6	3	5	7	9	4	11	11	10	14	20	7	2	8	7	4	6	17	13	11	5	8	5	12	9	0	2
B3GNT3	1	21	10	22	2	10	10	10	19	16	62	80	77	87	120	134	71	83	75	96	98	91	72	51	81	60	64	62	60	67	57	70	97	84	79	88	102	92	256	200	232	257	102	117	105	147	118	71	49
B3GNT4	0	8	4	2	4	3	14	1	8	7	23	21	26	25	35	31	15	12	17	8	22	11	17	8	25	18	15	21	35	25	6	14	13	17	10	16	22	20	19	17	17	23	32	13	17	47	15	12	5
B3GNT5	0	0	1	6	1	2	3	0	2	6	1	8	7	2	0	3	5	9	4	4	1	3	1	0	2	7	8	2	8	3	2	2	8	1	0	3	2	6	2	7	3	3	0	1	1	3	10	1	0
B3GNT6	0	0	0	0	0	0	0	0	0	0	0	0	0	0	0	0	0	0	0	0	0	0	0	0	0	0	0	0	0	0	0	0	0	0	0	0	0	0	0	0	0	0	0	0	0	0	0	0	0
B3GNT7	0	0	0	0	0	0	0	0	0	0	0	0	1	0	0	0	0	0	0	0	0	0	0	0	0	0	0	0	0	0	0	0	0	0	0	0	0	0	0	0	0	0	0	0	0	0	0	0	0
B3GNT8	0	0	0	0	0	0	0	0	0	0	0	0	0	0	0	0	0	0	0	0	0	0	0	0	0	0	0	0	0	0	0	0	0	0	0	0	0	0	0	0	0	0	0	0	0	0	0	0	0
B3GNT9	2	6	3	4	1	0	7	4	3	3	3	4	4	8	11	14	6	9	11	9	7	7	14	6	5	9	4	2	2	5	7	9	12	6	8	15	10	17	10	16	29	17	9	5	11	18	6	7	1
B3GNTL1	0	0	0	1	0	0	2	2	1	2	4	4	8	6	3	4	0	4	3	5	4	1	1	0	5	1	5	5	4	9	6	6	2	4	6	4	4	4	9	6	6	15	4	5	8	10	7	3	4
B4GALNT1	0	2	0	0	0	0	0	0	0	0	0	0	2	0	0	1	0	0	0	0	0	0	0	1	0	1	0	2	0	2	0	0	0	0	0	0	0	0	0	1	0	1	0	0	0	4	0	1	0
B4GALNT2	0	0	0	0	0	0	0	0	0	0	0	0	0	0	0	1	0	0	0	0	0	0	0	0	1	0	0	0	0	1	0	0	1	0	0	0	0	0	0	0	0	0	0	0	0	3	0	0	0
B4GALNT3	0	1	1	1	0	1	1	0	1	0	0	0	3	4	0	0	6	3	2	4	2	3	3	3	2	3	0	3	0	0	4	0	1	4	0	5	1	1	5	8	4	5	5	1	2	2	4	1	3
B4GALNT4	0	0	0	0	0	0	0	0	0	2	0	0	0	0	0	0	0	0	0	1	0	0	0	0	0	0	0	0	0	0	0	0	0	0	0	0	0	1	0	0	0	0	0	0	0	0	0	0	0
B4GALT1	1	7	3	0	2	3	3	1	8	8	11	11	6	1	13	6	11	6	10	24	8	11	18	5	6	14	24	10	3	11	15	12	8	9	9	5	6	11	9	19	13	10	25	25	24	30	3	3	6
B4GALT2	0	1	2	0	0	0	0	0	0	0	0	3	0	0	0	2	0	0	0	2	1	1	0	0	1	2	0	6	2	0	0	0	4	5	1	0	2	2	0	0	0	6	2	2	3	4	2	3	4
B4GALT3	11	16	13	9	4	8	29	10	19	17	46	96	54	45	127	109	60	44	60	54	71	66	74	41	68	51	78	76	88	110	36	86	77	48	71	74	89	75	63	99	70	90	77	111	132	197	66	63	32
B4GALT4	0	42	8	17	15	7	32	13	34	52	50	46	83	77	74	79	50	58	79	72	30	36	35	33	100	73	72	58	46	79	57	95	92	69	61	113	88	102	172	216	145	137	72	54	69	102	108	46	66
B4GALT5	12	114	90	110	51	88	132	76	165	113	149	114	166	192	232	196	153	163	170	116	117	130	221	86	158	138	223	184	118	126	120	158	213	182	203	234	213	433	329	396	407	293	206	131	85	116	278	136	154
B4GALT6	64	98	85	93	99	139	122	94	131	129	90	47	88	76	142	91	100	115	91	85	67	68	112	54	104	116	149	80	112	87	49	67	94	74	57	85	69	97	124	152	152	101	70	67	39	38	91	36	23
B4GALT7	0	2	0	0	0	0	0	0	1	1	3	4	1	1	2	8	3	2	3	0	1	1	1	2	1	2	0	5	0	2	1	2	0	2	0	3	3	3	3	1	5	4	4	1	0	1	2	3	1
B4GAT1	1	0	0	3	0	0	2	0	4	1	0	4	0	2	2	3	0	1	9	3	6	1	0	2	7	1	2	3	4	10	3	10	4	4	9	6	11	2	14	7	10	5	8	2	2	0	12	0	6
B9D1	0	2	5	1	1	0	6	1	1	0	2	1	9	2	3	2	3	1	3	1	0	0	1	1	8	5	5	7	5	12	1	6	1	0	0	3	0	1	6	2	0	0	6	3	0	0	1	1	2
B9D2	0	1	0	2	0	0	1	2	0	1	1	4	3	3	5	0	0	5	4	4	2	5	5	1	4	6	3	3	5	4	0	4	0	1	0	4	1	1	4	5	3	1	2	0	4	12	2	1	3
BAALC	0	0	0	0	2	0	0	0	1	0	0	0	1	1	4	6	3	0	0	0	0	0	0	0	0	0	1	0	0	0	1	0	0	4	0	0	2	1	1	0	0	1	3	0	1	0	0	0	0
BAAT	11	5	2	6	11	8	2	5	5	7	3	4	3	1	6	3	3	1	4	5	2	4	5	7	9	2	4	6	11	7	0	2	3	0	3	0	1	0	2	3	1	0	0	3	3	5	2	4	1
BABAM1	3	31	29	18	13	24	64	28	35	42	86	84	103	72	120	83	112	80	118	134	64	61	98	52	65	65	66	76	44	77	56	87	99	74	60	55	79	99	188	221	175	157	149	95	53	107	67	57	84
BABAM2	26	23	19	30	18	48	36	31	30	30	30	45	21	35	36	32	20	34	37	43	26	20	39	32	48	25	58	38	41	54	10	16	27	13	19	33	33	21	37	42	32	38	32	19	18	32	31	26	16
BACE1	0	3	2	1	0	0	3	0	4	9	3	6	6	3	2	3	4	1	2	0	1	0	0	2	7	3	8	8	1	3	0	4	1	3	14	5	7	5	6	13	12	8	3	7	9	14	10	11	3
BACE2	1	8	10	1	4	8	13	10	14	11	14	12	15	3	18	21	7	8	19	26	8	5	9	9	12	2	16	11	19	16	6	8	12	2	0	3	2	9	7	12	17	8	24	10	12	14	20	7	7
BACH1	41	81	20	61	57	37	29	29	43	59	104	94	85	66	84	70	81	93	90	113	47	73	56	45	114	82	98	60	105	95	72	119	121	77	35	54	70	61	90	152	115	123	75	137	101	96	32	23	17
BACH2	0	0	0	0	0	0	0	0	0	0	0	0	0	0	0	0	0	1	0	0	0	0	0	0	0	0	2	0	0	0	0	0	0	0	0	0	0	0	0	0	0	0	0	0	0	0	0	0	0
BAD	0	6	3	0	2	1	6	1	4	1	3	5	5	3	8	6	6	8	10	11	3	12	3	3	7	7	2	7	8	8	4	2	12	4	2	5	9	2	8	8	6	11	7	2	4	7	5	2	0
BAG1	1	24	6	11	11	11	19	7	3	7	15	16	18	27	37	46	16	18	18	22	13	12	27	10	29	30	41	42	27	41	3	46	53	39	20	12	25	57	34	20	29	90	21	19	6	57	14	4	6
BAG2	12	26	11	26	21	28	38	16	39	50	49	62	86	80	101	83	73	80	80	83	96	59	97	50	111	88	68	77	73	93	76	119	136	118	48	71	124	162	125	183	200	215	90	122	104	182	39	11	14
BAG3	6	7	1	2	2	1	3	2	11	4	11	8	16	20	32	31	26	30	32	44	43	44	37	12	31	15	33	55	20	30	14	33	32	31	1	21	15	19	14	81	54	96	26	32	33	44	13	1	9
BAG4	1	24	11	4	8	5	12	7	23	19	32	20	14	26	32	24	30	32	35	36	25	32	24	18	13	9	39	22	17	11	18	39	31	27	46	37	26	53	67	69	75	73	24	22	19	35	59	28	37
BAG5	0	3	2	0	2	5	6	0	0	1	2	2	3	5	10	2	1	4	1	1	1	4	3	5	10	4	1	4	0	0	10	8	8	3	0	2	0	4	5	8	8	14	0	1	3	3	7	2	0
BAG6	2	10	8	11	11	5	17	3	9	15	37	21	24	32	43	16	25	20	37	34	18	21	34	15	26	22	24	15	20	36	23	55	43	45	30	29	25	28	64	64	60	65	24	32	27	38	41	15	31
BAHCC1	0	0	1	0	0	0	1	0	0	0	0	0	0	0	0	0	0	0	0	0	0	0	0	0	0	0	0	0	0	0	0	0	0	0	0	0	0	1	0	0	0	0	0	1	0	0	0	0	0
BAHD1	0	4	1	6	0	1	1	0	1	6	4	2	6	9	10	2	3	2	2	1	6	6	6	3	4	8	5	2	6	3	2	2	5	6	3	11	6	1	6	3	2	9	4	8	7	12	4	2	0
BAIAP2	3	92	31	21	5	17	64	14	44	32	119	136	153	138	202	204	186	149	218	221	161	235	218	128	307	225	169	137	99	157	175	257	346	216	118	264	274	285	407	379	391	417	198	249	244	330	355	219	178
BAIAP2L1	13	36	53	39	18	50	139	50	110	105	363	422	256	237	522	421	280	327	421	351	358	457	407	277	284	228	343	342	201	278	215	364	456	361	19	88	225	345	68	512	613	637	67	182	406	552	51	32	20
BAIAP2L2	4	2	1	2	1	3	7	1	6	2	7	9	17	18	21	14	7	12	13	11	11	18	16	13	16	22	5	8	19	14	11	9	8	5	3	8	8	9	9	10	25	13	2	11	10	14	3	0	4
BAK1	0	0	0	0	0	0	0	0	0	0	2	0	0	3	1	3	4	0	1	7	0	4	4	0	4	2	0	3	0	2	1	0	2	4	2	1	1	3	2	3	1	5	1	2	3	4	7	3	5
BAMBI	0	0	2	1	0	2	5	1	4	0	8	5	4	10	5	3	5	7	4	7	0	5	4	3	12	1	4	5	1	3	3	3	5	1	1	2	13	2	4	18	7	6	9	7	12	5	0	0	2
BANF1	1340	985	799	1189	1039	1319	1193	1247	1302	1161	1063	1518	1211	924	1294	1277	938	1015	1340	1249	747	934	946	805	1146	1105	1552	1236	1820	2083	348	485	783	510	495	472	504	753	864	842	956	827	1496	975	668	1159	974	547	580
BANF2	0	0	0	0	0	0	0	0	0	0	0	0	0	0	0	0	0	0	0	0	0	0	0	0	0	0	0	0	0	0	0	0	0	0	0	0	0	0	0	0	0	0	0	0	0	0	0	0	0
BANK1	0	0	0	0	0	0	0	0	0	0	0	0	0	0	0	0	0	0	0	0	0	0	0	0	0	0	0	0	0	0	0	0	0	0	0	0	0	0	0	0	0	0	0	0	0	0	0	0	0
BANP	39	121	76	34	18	22	172	46	117	100	303	285	305	278	279	318	270	287	311	248	318	365	249	184	273	261	299	292	281	317	154	323	356	265	145	188	215	230	518	441	466	485	335	330	253	346	300	163	154
BAP1	1	1	3	0	1	0	8	0	1	4	14	16	9	8	12	4	2	7	10	11	2	3	2	4	4	6	7	16	11	15	5	10	12	8	2	9	15	16	14	28	12	31	14	11	18	19	17	1	9
BARD1	24	31	21	31	20	31	34	41	35	43	66	58	49	61	121	68	47	57	49	57	43	62	51	32	70	71	71	65	65	75	24	44	42	42	36	46	56	32	70	67	35	63	85	78	36	81	18	13	17
BARHL1	0	0	0	0	0	0	0	0	0	0	0	0	0	0	0	0	0	0	0	0	0	0	0	0	0	0	0	0	0	0	0	0	0	0	0	0	0	0	0	0	0	0	0	0	0	0	0	0	0
BARHL2	0	0	0	1	1	0	2	0	3	0	1	0	3	1	6	4	10	3	5	7	4	2	1	2	2	4	3	6	1	0	2	14	10	7	0	0	7	8	2	13	12	7	2	4	6	4	2	0	0
BARX1	2	3	1	0	0	3	3	6	3	0	2	6	10	5	9	5	2	6	4	5	1	6	2	4	3	7	15	13	7	22	2	1	13	3	0	4	2	4	0	2	9	5	2	4	0	10	0	0	1
BARX2	17	12	4	17	12	6	14	8	17	10	10	10	8	12	13	10	14	14	26	17	14	19	11	5	15	9	23	15	18	21	12	13	15	10	6	12	11	12	14	15	18	19	9	12	18	21	24	19	17
BASP1	0	2	18	4	10	15	9	9	20	11	38	28	34	10	56	33	32	60	64	64	37	46	59	33	52	61	25	33	29	54	59	70	99	69	3	28	65	77	5	105	112	119	5	47	30	65	6	9	1
BATF	0	0	0	0	0	0	0	0	0	0	0	0	0	0	0	0	0	0	0	0	0	0	0	0	0	0	0	0	1	0	0	0	0	0	0	0	0	0	0	0	0	0	0	0	0	0	0	0	0
BATF2	0	0	0	0	0	0	0	0	0	0	0	0	0	0	0	0	0	0	0	1	0	1	0	0	0	0	0	0	0	0	0	0	0	0	0	0	0	1	0	0	0	0	0	0	0	0	0	0	0
BATF3	0	0	0	0	0	0	0	0	0	0	0	0	0	0	0	0	0	0	0	0	0	0	0	0	0	0	0	0	0	0	0	0	0	0	0	0	0	0	0	0	0	0	0	0	0	0	0	0	0
BAX	2	3	6	6	4	9	5	4	6	3	4	2	14	3	11	7	4	2	8	7	5	3	5	4	13	8	6	7	3	10	5	3	6	4	5	11	3	6	24	5	9	7	5	6	13	4	0	0	3
BAZ1A	195	226	152	210	148	196	295	237	244	287	289	313	350	358	392	328	310	238	396	282	254	255	365	277	407	301	424	325	513	432	86	167	225	175	110	108	137	187	167	158	207	161	321	239	164	246	138	120	90
BAZ1B	27	82	60	34	29	32	107	45	70	85	337	356	138	107	228	177	168	222	255	187	90	139	192	160	155	126	199	120	144	156	43	84	60	47	79	126	91	111	159	156	136	118	252	177	118	142	99	77	62
BAZ2A	17	41	45	14	10	9	34	19	37	34	144	122	108	97	149	93	99	115	104	105	70	130	110	79	114	95	84	93	96	88	50	108	129	69	104	67	69	78	194	162	173	182	106	65	77	122	126	105	87
BAZ2B	21	85	22	40	17	10	94	39	51	69	65	99	68	80	112	96	85	87	72	64	62	87	52	70	103	59	59	51	96	87	29	52	37	29	26	46	30	39	62	99	78	107	38	26	44	36	78	25	36
BBC3	0	0	0	0	0	0	0	1	0	0	0	0	0	0	0	2	0	0	0	1	0	0	0	0	0	0	1	0	0	0	1	0	0	0	0	0	0	0	0	0	0	1	0	0	0	0	0	0	0
BBIP1	29	44	17	61	67	39	39	20	31	32	18	34	38	23	27	31	43	56	28	24	14	25	23	18	32	29	46	54	42	41	17	23	28	30	25	14	14	17	36	32	39	36	28	23	29	16	23	18	17
BBOF1	0	3	0	3	1	0	0	0	0	1	0	0	1	1	0	0	4	9	1	3	0	1	0	1	7	1	1	0	3	3	0	0	0	2	0	0	0	0	0	3	14	0	0	0	0	0	0	0	0
BBOX1	0	0	0	0	0	0	0	0	0	0	0	0	0	0	0	0	0	0	0	0	0	0	0	0	0	0	0	0	0	0	0	0	0	0	0	0	0	0	0	0	0	0	0	0	0	0	0	0	0
BBS1	0	0	0	0	0	0	0	0	0	0	2	0	0	0	6	1	0	1	0	0	0	1	0	0	0	1	1	0	0	0	0	1	1	0	0	1	0	0	0	0	0	0	0	0	0	0	0	0	0
BBS10	0	1	2	1	0	1	0	3	0	0	0	0	0	0	1	1	0	0	0	1	0	2	2	1	0	2	0	0	0	0	1	4	1	3	0	0	0	0	0	0	2	1	0	2	0	1	0	5	0
BBS12	35	64	48	51	33	39	83	36	97	72	55	80	101	94	113	96	52	55	64	59	48	39	84	58	97	99	109	119	165	179	44	89	82	67	38	44	54	75	109	128	109	92	181	100	99	86	107	50	51
BBS2	76	244	194	189	175	200	325	180	371	311	480	568	672	633	691	581	420	421	435	457	540	536	625	362	622	536	563	514	556	653	377	682	745	599	343	533	520	593	1141	1152	1041	1003	676	610	490	852	729	434	359
BBS4	24	74	41	21	14	28	85	41	65	73	64	97	79	102	81	105	116	113	120	108	54	96	86	55	120	103	118	90	117	105	72	163	162	114	125	158	178	181	220	201	194	162	137	100	97	152	90	41	57
BBS5	160	74	48	120	104	41	144	99	123	128	54	52	185	105	112	121	126	110	97	87	59	108	94	70	157	207	189	152	189	112	71	89	106	95	98	90	109	114	151	144	159	168	212	111	88	174	162	87	97
BBS7	8	52	18	20	28	14	51	32	42	45	35	45	52	61	32	44	42	42	57	59	47	57	49	33	65	64	74	60	69	60	22	28	70	17	18	21	34	33	48	49	44	40	100	60	29	104	68	54	25
BBS9	49	85	46	63	33	88	92	65	84	103	87	59	61	53	78	72	43	66	100	70	75	62	87	55	95	81	107	67	120	102	29	37	50	39	29	40	41	47	71	58	48	57	116	106	59	111	82	51	33
BBX	23	57	59	48	14	22	140	38	50	57	26	32	121	67	133	102	82	101	161	121	65	52	48	43	84	96	228	127	155	149	44	80	56	53	16	24	25	48	51	23	55	37	101	77	57	77	156	75	75
BCAM	0	0	0	1	0	0	0	0	0	0	0	0	0	0	0	0	0	0	0	0	0	0	0	0	1	0	0	0	0	0	0	0	0	0	0	0	4	0	0	0	0	2	0	1	0	0	0	0	0
BCAN	0	0	1	1	0	0	0	0	0	0	0	8	2	1	4	3	0	0	0	0	0	0	2	0	0	0	2	4	1	0	0	0	0	0	0	0	0	2	2	0	0	0	0	4	3	0	0	1	1
BCAP29	114	194	172	346	322	303	241	258	253	346	168	218	296	293	265	287	237	273	391	296	162	214	191	178	336	330	349	270	376	310	123	242	238	217	219	186	234	291	245	324	253	243	340	260	128	249	260	140	119
BCAP31	3	46	18	29	12	43	37	48	40	30	42	47	48	35	55	48	49	45	61	51	29	32	37	30	46	40	51	30	33	46	17	10	38	24	24	26	25	37	56	44	66	61	44	17	19	31	34	28	34
BCAR1	0	3	3	1	0	0	2	3	3	2	7	15	1	1	23	14	8	7	12	9	6	4	8	5	6	6	6	8	3	9	2	7	5	2	5	11	12	21	1	8	12	12	9	5	6	21	0	0	1
BCAR3	6	20	6	13	17	12	18	11	17	7	34	33	35	27	22	21	19	16	32	31	26	15	22	19	44	45	26	33	33	47	23	44	52	11	43	34	36	45	64	50	52	47	25	23	23	35	16	9	12
BCAR4	2341	657	668	1310	1215	1063	1013	1035	1177	889	701	775	1004	760	998	918	621	734	1127	1068	387	462	539	536	1003	948	1176	834	1548	1618	261	437	652	460	364	279	276	462	689	647	802	667	1044	618	364	643	664	357	336
BCAS1	0	0	0	0	0	0	0	0	0	0	0	0	0	0	0	0	0	0	0	0	0	0	0	0	0	0	0	0	0	0	0	0	0	0	0	1	0	0	0	0	0	0	0	0	0	0	0	0	0
BCAS2	392	333	111	503	385	388	260	301	246	351	131	127	273	150	281	251	151	272	301	249	116	137	140	134	281	281	325	260	277	246	110	172	277	163	153	134	159	224	306	316	321	352	279	175	134	214	154	99	69
BCAS3	21	100	37	53	32	39	66	38	66	63	80	128	105	90	73	96	147	140	166	98	90	98	104	62	162	117	149	131	86	100	56	136	129	93	76	82	100	124	158	195	194	199	121	95	66	92	159	69	60
BCAS4	1	1	0	1	4	0	1	3	3	2	0	0	2	0	3	3	0	1	1	0	0	0	0	3	8	4	9	7	11	8	0	0	0	2	0	0	1	3	0	0	4	0	1	3	2	2	0	0	0
BCAT1	34	69	42	54	51	37	91	28	80	92	59	84	101	88	107	71	93	134	111	72	80	74	75	50	181	120	112	68	105	112	78	206	166	170	78	70	154	165	156	183	197	272	108	124	58	139	83	38	38
BCAT2	4	6	6	6	0	6	8	2	7	2	6	7	6	11	13	6	3	4	15	4	7	7	7	1	14	7	10	8	9	21	6	5	16	14	2	1	11	8	20	30	10	12	14	15	7	19	16	6	12
BCCIP	102	179	60	166	244	139	139	180	229	228	97	119	158	129	166	145	112	145	178	166	90	80	89	115	198	183	137	106	172	182	68	102	141	91	91	125	96	140	181	165	188	223	123	94	52	144	161	101	88
BCDIN3D	0	0	0	0	0	0	0	0	0	1	0	0	0	0	1	2	0	0	1	0	0	0	0	0	0	0	0	0	0	0	0	0	0	0	0	0	0	0	0	0	0	0	0	0	0	0	0	0	0
BCHE	0	0	0	0	0	0	0	0	0	0	0	0	0	0	0	0	0	0	0	0	0	0	0	0	0	0	0	0	0	0	0	0	0	0	0	0	0	0	0	0	0	0	0	0	0	0	0	0	0
BCKDHA	0	4	6	1	1	1	9	3	3	3	24	37	18	20	18	20	18	9	11	22	13	10	32	19	13	17	17	13	15	12	13	21	20	19	12	9	9	20	36	37	29	25	16	25	24	14	7	14	18
BCKDHB	16	20	15	8	21	22	34	16	39	27	58	84	70	67	90	56	60	57	57	61	54	62	64	41	78	56	68	88	94	90	40	48	80	59	48	61	54	78	88	62	95	85	92	76	50	98	10	9	20
BCKDK	4	18	6	6	0	3	17	15	16	5	33	42	46	43	34	46	23	22	36	28	27	36	23	24	21	42	64	49	45	35	21	41	36	30	24	32	18	28	41	58	36	81	56	36	33	63	21	19	22
BCL10	289	237	144	306	205	164	238	215	195	234	369	358	435	384	389	415	355	328	330	357	335	404	435	339	560	449	516	471	402	494	251	444	553	386	391	383	390	541	632	629	745	658	641	642	504	706	783	371	334
BCL11A	0	1	0	0	1	3	1	0	2	0	0	0	0	0	0	0	3	0	1	0	1	2	0	0	1	0	1	0	1	0	1	1	2	0	0	1	0	0	1	2	1	1	0	3	0	2	0	0	0
BCL11B	0	0	0	0	0	0	2	0	1	0	0	0	1	0	0	0	2	0	2	1	0	0	0	0	0	0	0	2	2	0	0	0	0	1	0	0	0	0	0	0	1	1	0	0	0	3	0	0	0
BCL2	0	1	0	0	0	0	0	0	0	0	0	0	0	0	1	1	0	1	2	0	0	0	0	0	0	0	0	0	0	0	0	0	0	0	0	0	0	0	0	1	1	0	0	0	1	0	0	0	0
BCL2A1	0	0	0	1	0	0	1	0	0	0	1	0	0	0	0	0	0	0	1	0	0	0	0	0	0	0	0	0	0	0	0	0	0	0	0	0	0	0	0	0	0	0	0	0	0	0	0	0	0
BCL2L1	4	13	13	9	4	3	31	11	25	11	47	61	47	48	46	61	56	39	56	48	38	39	49	20	76	57	55	52	30	38	29	51	50	37	21	57	62	51	75	60	48	82	45	60	45	53	62	21	31
BCL2L10	658	823	549	608	521	543	1169	856	1118	913	1701	2560	1469	1383	1474	1317	1084	1182	1512	1398	1418	1617	1341	1050	1733	1546	1778	1605	1788	2417	650	1086	1321	921	970	1075	1031	1387	1527	1505	1601	1652	1863	1524	1101	1807	967	527	512
BCL2L11	0	7	9	6	1	2	6	6	10	4	11	10	22	20	34	16	17	28	16	14	17	20	14	17	18	23	10	13	12	12	5	12	18	4	16	6	11	34	13	12	24	18	9	8	34	29	14	8	8
BCL2L12	0	9	4	2	4	1	5	2	8	8	6	9	13	9	24	11	12	9	7	22	10	9	12	10	9	3	24	14	11	5	5	10	14	5	7	11	3	20	20	18	28	26	11	4	11	8	12	7	6
BCL2L13	5	5	1	0	1	4	5	0	6	4	6	4	4	3	9	10	6	7	5	6	1	12	5	3	6	4	2	3	6	1	3	10	3	12	10	10	4	10	22	9	16	13	2	3	0	3	8	3	8
BCL2L14	13	23	8	23	16	8	29	13	10	13	41	52	33	24	22	12	40	34	53	48	6	17	12	17	50	39	25	16	18	24	10	18	25	14	37	21	28	35	44	37	32	34	24	22	22	26	27	9	10
BCL2L15	0	2	0	3	1	4	2	0	2	5	0	0	1	2	0	0	6	0	8	1	0	0	2	0	1	1	0	1	2	2	0	1	1	3	0	0	0	0	0	3	0	1	0	1	2	1	0	0	0
BCL2L2	3	16	9	5	1	3	10	2	11	16	23	15	22	11	36	16	19	16	24	17	4	4	15	9	12	21	34	12	16	5	2	21	15	15	28	9	6	21	36	8	22	20	0	3	16	14	22	8	26
BCL3	1	5	2	2	1	1	13	2	4	5	23	16	8	18	35	33	9	13	14	28	7	12	25	10	18	13	19	19	26	41	13	13	23	12	9	5	13	19	22	26	16	16	15	24	12	33	23	10	14
BCL6	1	11	3	4	5	0	9	1	3	7	8	2	5	3	10	9	14	5	6	5	5	6	4	2	3	4	4	6	3	1	4	32	11	10	4	9	12	14	20	14	16	15	9	4	2	10	2	14	8
BCL6B	17	23	21	30	24	12	39	9	39	23	48	53	50	33	82	49	31	27	54	45	62	72	60	30	62	49	44	55	48	48	22	55	52	37	72	81	59	70	65	68	71	89	134	189	181	142	102	64	69
BCL7A	0	0	2	2	1	1	1	4	3	3	1	7	17	4	20	13	7	5	12	4	7	3	7	2	9	7	4	5	4	4	3	38	13	18	12	24	13	27	21	19	17	26	9	34	14	5	7	17	4
BCL7B	7	28	33	32	7	19	45	14	51	58	96	122	151	161	208	201	149	159	221	170	137	147	223	109	245	190	166	152	101	114	172	233	338	234	56	96	132	222	163	395	406	425	97	168	153	241	112	65	41
BCL7C	1	5	8	3	2	2	13	5	11	6	18	11	13	22	41	39	13	15	21	26	7	7	22	20	33	15	22	29	52	54	4	15	21	9	3	0	9	24	3	10	12	20	3	3	13	18	6	2	3
BCL9	7	8	9	4	6	7	10	5	12	8	23	21	25	20	30	9	18	17	26	22	10	12	12	16	21	22	30	25	17	26	22	25	37	15	27	25	26	34	29	17	36	46	25	29	33	21	19	12	12
BCL9L	2	1	1	1	1	0	1	1	2	0	0	0	2	1	3	1	5	1	2	4	1	0	1	1	1	1	1	0	4	0	2	3	1	6	1	1	2	2	2	2	3	3	0	1	1	0	3	0	0
BCLAF1	21	59	23	54	28	25	54	28	53	51	123	122	120	109	70	92	90	135	95	68	91	119	84	60	128	158	133	92	91	99	65	93	83	81	68	86	38	78	155	146	152	117	136	80	62	74	100	44	77
BCLAF3	114	78	133	132	158	89	296	140	317	294	251	286	262	255	218	218	189	194	274	224	219	212	214	188	307	331	326	310	444	251	96	153	206	118	97	124	112	191	137	217	236	226	145	194	114	239	79	24	59
BCNT2	659	1509	914	719	693	578	1933	1066	1606	1720	1649	2108	2220	1891	1621	1784	1530	1926	2001	1577	1662	1899	1782	1367	2120	1902	2488	2103	2978	2840	764	1358	1685	1210	1016	935	976	1399	1674	1953	1788	1656	2576	1865	1266	2028	1863	982	953
BCO1	0	0	0	0	0	0	0	0	0	0	0	0	0	0	0	0	0	0	0	0	0	0	0	0	0	0	0	0	0	0	0	0	0	0	0	0	0	0	0	0	0	0	0	0	0	0	0	0	0
BCO2	0	0	1	0	1	0	4	0	1	0	4	0	0	0	0	1	0	3	1	0	0	0	0	1	0	1	2	0	0	2	1	1	3	0	2	0	0	1	1	2	0	0	0	0	0	0	0	0	0
BCOR	21	55	50	18	7	3	99	25	81	56	160	187	160	151	126	118	138	154	107	92	84	111	121	85	185	130	231	221	184	196	91	160	176	123	60	74	72	71	131	141	183	152	219	207	160	208	65	52	76
BCORL1	0	3	3	3	2	6	5	1	7	6	7	9	9	14	16	11	4	4	10	10	9	10	15	2	13	15	4	10	13	6	2	1	10	3	5	2	2	5	9	19	10	12	4	7	1	10	13	5	9
BCR	0	0	0	0	0	2	1	0	2	1	0	0	2	0	0	0	2	0	1	2	4	1	1	2	0	3	4	1	0	0	0	0	0	0	4	2	1	0	0	2	0	0	0	0	0	1	4	0	0
BCS1L	0	20	18	23	6	17	21	17	28	19	23	50	35	36	30	41	25	44	39	44	37	20	38	22	34	37	44	23	21	32	16	37	65	48	13	33	34	28	66	69	88	86	65	31	35	43	25	24	24
BDA20	0	0	0	0	0	0	0	0	0	0	0	0	0	0	0	0	0	0	0	0	0	0	0	0	0	0	0	0	0	0	0	0	0	0	0	0	0	0	0	0	0	0	0	0	0	0	0	0	0
BDH1	1	2	0	1	6	3	5	0	2	1	1	5	7	0	0	1	7	4	5	5	1	5	0	2	4	14	7	2	7	7	0	5	4	2	3	6	3	8	15	5	8	13	12	12	7	10	2	10	2
BDH2	0	0	0	0	0	2	0	1	0	0	0	0	0	0	0	0	0	0	0	1	1	3	0	0	0	0	0	0	0	0	0	0	0	0	2	0	0	0	0	0	0	0	0	0	2	0	0	0	0
BDKRB1	0	0	0	0	0	0	0	0	0	0	0	0	0	0	0	0	0	0	0	0	0	0	0	0	0	0	0	0	0	0	0	0	0	0	0	0	0	0	0	0	0	0	0	0	0	0	0	2	0
BDKRB2	0	0	0	0	0	0	0	0	0	0	0	0	0	0	0	0	0	0	0	0	0	0	0	0	0	0	0	0	0	0	0	0	0	0	0	0	0	0	0	0	0	0	0	0	0	0	0	0	0
BDNF	13	18	35	15	17	11	28	14	21	29	37	37	43	22	67	81	53	49	78	74	56	49	32	36	85	65	64	57	82	78	8	16	40	31	5	3	15	19	15	9	20	39	28	8	11	34	12	8	8
BDP1	21	95	23	33	28	66	64	56	70	50	126	116	133	106	151	104	86	129	122	101	104	97	107	88	87	98	123	83	147	90	29	68	58	47	56	56	31	60	91	63	104	85	83	57	59	52	82	45	46
BEAN1	0	0	0	1	0	1	0	0	0	0	0	0	0	0	0	0	0	0	0	0	0	0	0	0	0	1	0	0	1	0	0	0	0	0	0	0	1	0	1	0	1	0	1	0	0	0	0	0	0
BECN1	27	56	60	43	39	39	74	53	75	56	78	141	127	94	139	98	95	55	89	94	112	111	125	55	84	100	146	91	120	151	64	154	175	103	88	108	142	134	192	205	144	220	120	176	144	174	111	111	74
BECN2	0	0	0	0	0	0	0	0	0	0	0	0	0	0	0	0	0	0	0	0	0	0	0	0	0	0	0	0	0	0	0	0	0	0	0	0	0	0	0	0	0	0	0	0	0	0	0	0	0
BEGAIN	0	0	0	0	0	0	0	0	0	0	0	0	0	0	0	0	0	0	0	0	0	0	0	0	1	0	0	0	0	0	0	0	0	0	0	0	1	0	0	3	0	0	0	0	0	0	0	0	0
BEND2	0	0	0	0	0	0	0	0	0	0	0	0	0	0	0	0	0	0	2	0	0	0	0	0	0	0	0	0	0	0	0	0	0	0	0	0	0	0	0	0	2	0	0	0	0	3	0	0	0
BEND3	2	5	4	6	5	5	6	6	9	9	0	7	18	16	9	7	11	6	14	10	1	7	8	3	4	11	14	22	21	9	4	1	6	5	6	1	11	4	8	2	0	1	3	5	6	6	28	7	1
BEND4	2	3	12	2	1	1	1	3	3	2	13	11	8	16	8	7	5	14	9	11	10	8	4	7	20	16	18	9	10	6	3	9	6	7	0	7	9	15	5	4	19	30	10	18	16	27	4	4	2
BEND5	0	1	0	1	0	2	0	1	0	0	1	0	1	0	0	1	0	0	0	0	0	1	0	0	2	2	0	0	0	0	0	0	0	0	1	0	0	0	0	0	1	0	0	0	0	0	0	0	1
BEND6	0	0	0	2	0	0	0	0	0	0	0	0	0	0	0	0	0	0	0	1	0	0	0	0	0	0	0	0	0	0	0	0	0	0	0	0	0	0	0	0	0	0	0	0	0	0	0	0	0
BEND7	2	5	2	3	2	0	8	2	0	0	3	3	5	2	9	4	9	0	2	1	1	5	3	4	2	4	4	6	2	3	2	3	6	1	2	4	0	6	4	1	2	4	1	0	0	2	9	4	2
BERV-K1	0	0	0	0	0	0	0	0	0	0	0	0	0	0	0	0	0	0	0	0	0	0	0	0	0	0	0	0	0	0	0	0	0	0	0	0	0	0	0	1	0	0	0	0	0	0	0	0	0
BEST1	0	0	0	0	0	1	0	0	0	0	0	0	0	0	0	0	0	0	0	0	0	0	0	0	0	0	0	0	0	0	0	0	0	1	0	0	0	0	0	0	0	0	0	0	0	0	0	0	0
BEST2	0	0	0	0	0	0	0	0	0	0	0	0	1	0	0	0	0	1	0	0	0	0	1	0	2	0	0	1	2	1	0	0	0	0	0	1	0	0	3	0	0	0	0	2	0	0	0	0	0
BEST3	0	0	3	2	0	4	2	0	1	0	0	0	0	1	2	2	1	0	1	0	3	0	0	0	0	0	0	0	0	0	2	9	0	9	0	1	0	1	2	0	0	7	3	1	2	1	0	3	1
BEST4	0	0	0	0	0	0	0	0	0	0	0	2	0	0	0	0	0	0	0	0	0	0	0	0	0	0	0	0	0	0	0	0	0	0	0	0	0	0	0	0	0	0	0	0	0	0	0	0	0
BET1	305	146	161	186	332	170	275	253	320	360	203	237	220	223	310	324	320	308	465	414	285	336	427	312	301	257	263	249	282	303	117	170	252	173	94	80	77	174	254	287	369	362	369	249	199	339	354	197	182
BET1L	0	3	1	1	0	0	2	1	1	2	5	4	11	14	9	8	4	8	8	7	6	4	4	9	6	5	6	9	3	10	0	12	15	3	10	8	7	13	13	9	6	9	11	6	10	13	5	2	1
BEX2	0	0	0	0	0	0	0	0	0	0	0	0	0	0	0	1	0	0	0	0	0	0	0	0	0	0	0	0	0	0	0	0	0	0	0	0	0	0	0	0	0	0	0	0	0	0	0	0	0
BEX3	4	5	1	4	4	10	3	2	5	5	3	0	2	1	5	2	0	3	0	2	0	0	7	2	2	0	3	2	3	2	3	1	0	5	0	1	2	1	4	1	2	2	6	2	2	2	0	0	1
BEX4	48	68	8	6	103	72	48	59	80	92	32	43	117	95	90	58	4	4	17	15	5	6	10	6	48	43	98	64	75	39	22	26	42	24	25	20	23	33	128	127	119	114	63	31	62	62	26	8	11
BEX5	0	0	0	0	0	0	0	0	0	0	0	0	0	0	0	0	0	0	0	0	0	0	0	0	0	0	0	0	0	0	0	0	0	0	0	0	0	0	0	0	0	0	0	0	0	0	0	0	0
BFAR	8	8	10	3	10	7	8	7	8	9	26	16	13	18	30	13	25	6	23	22	14	15	7	9	5	12	11	13	8	30	21	26	38	17	29	32	28	16	64	27	37	39	8	46	18	38	31	20	3
BFSP1	0	0	0	0	0	0	0	0	0	0	0	0	0	0	2	0	0	2	2	0	0	0	1	0	0	0	3	0	0	0	0	0	0	0	0	0	0	0	0	1	0	0	0	0	0	0	0	0	0
BFSP2	0	0	0	2	0	0	0	0	0	0	0	0	0	0	0	0	1	0	0	0	0	0	0	0	0	0	0	0	0	0	0	0	0	0	0	0	0	0	0	0	0	0	0	0	0	0	0	0	0
BGLAP	0	0	0	0	0	0	0	0	0	0	0	0	0	0	0	0	0	0	0	0	0	0	0	0	0	0	0	0	0	0	0	0	0	0	0	0	0	0	0	1	0	0	0	0	0	0	0	0	0
BGN	0	0	0	0	0	0	0	0	0	0	0	0	0	0	0	0	0	0	0	0	0	0	0	0	0	0	0	0	0	0	0	0	0	0	0	0	0	0	0	0	0	0	0	0	0	0	0	0	0
BHLHA15	0	0	0	0	0	0	0	0	0	0	0	0	0	0	0	0	0	0	0	0	0	0	0	0	0	0	0	0	0	0	0	0	0	0	0	0	0	0	0	0	0	0	0	0	0	0	0	0	0
BHLHA9	0	0	0	0	0	0	0	0	0	0	0	0	0	0	0	0	0	0	0	0	0	0	0	0	0	1	0	0	0	0	0	0	0	0	0	0	0	0	0	0	0	0	0	0	0	0	0	0	0
BHLHE22	6	1	2	13	11	4	14	1	25	18	2	0	15	1	7	3	4	7	19	6	4	2	10	5	3	6	15	3	3	1	3	9	8	5	3	2	3	11	1	3	6	2	1	0	2	2	9	2	2
BHLHE23	0	0	0	0	0	0	0	0	0	0	0	0	0	0	0	0	0	0	0	0	0	0	0	0	0	0	0	0	0	0	0	0	0	0	0	0	0	0	0	0	0	0	0	0	0	0	0	0	0
BHLHE40	0	0	0	0	0	0	0	0	0	0	0	0	0	0	0	0	0	0	0	0	0	0	0	0	0	0	0	0	0	0	0	0	0	0	0	0	0	0	0	0	0	0	0	0	0	0	0	0	0
BHLHE41	0	0	3	0	0	0	0	0	0	1	0	0	0	1	1	0	2	0	0	0	1	0	0	0	0	0	0	0	0	0	0	0	0	0	0	2	0	2	0	0	0	0	1	6	0	0	0	0	0
BHMG1	0	0	0	0	2	0	0	2	0	0	5	1	2	3	2	0	0	0	1	0	1	0	2	0	0	1	3	2	0	0	1	0	0	1	0	0	1	2	0	0	1	2	3	0	0	0	0	0	0
BHMT	7	7	7	8	15	7	8	7	8	15	1	5	12	12	11	17	11	6	9	15	2	7	9	10	10	10	17	10	11	14	16	24	24	17	4	9	6	12	33	23	22	20	9	14	8	24	21	10	10
BHMT2	1	0	0	0	0	2	0	0	0	0	0	0	2	0	0	0	0	1	0	0	0	0	1	0	0	0	4	0	0	0	1	0	0	0	0	0	0	0	0	0	0	0	0	0	0	0	0	0	0
BICC1	255	214	221	181	217	137	360	211	338	367	296	333	315	222	354	274	302	338	398	289	190	309	164	197	345	285	456	306	465	322	92	142	208	136	203	192	175	206	233	197	268	210	383	195	186	267	300	210	145
BICD1	1	13	18	7	15	17	25	22	15	25	15	27	27	19	38	23	21	33	15	29	15	15	19	8	19	14	13	14	30	26	30	33	34	24	9	22	9	8	21	30	27	36	36	32	41	22	4	7	9
BICD2	2	22	14	16	10	9	14	10	9	19	11	23	14	18	43	13	9	10	16	14	16	10	24	16	35	13	37	26	26	25	14	22	21	20	19	17	25	31	46	45	27	42	34	29	15	12	21	10	6
BICDL1	1	6	3	7	3	1	6	4	5	7	13	4	6	7	14	13	3	7	10	8	5	5	11	7	14	7	7	9	8	8	3	8	6	5	4	5	12	5	5	7	8	7	7	4	0	5	3	1	2
BICDL2	2	2	0	1	0	0	2	3	0	1	9	3	9	6	10	7	6	9	11	9	7	9	26	5	9	8	12	15	5	6	14	17	18	11	10	16	21	9	27	39	30	42	13	12	4	14	18	4	7
BICRA	0	0	0	0	0	1	2	0	0	1	3	7	3	0	9	4	1	2	3	4	3	4	0	0	2	1	3	2	1	3	0	1	4	1	3	2	1	4	1	9	4	5	1	0	1	2	7	3	1
BICRAL	0	11	19	12	3	6	8	1	4	12	14	17	13	4	35	16	24	19	19	9	10	7	13	6	26	19	13	24	17	2	4	20	19	10	19	12	5	20	28	22	20	20	4	32	3	32	12	6	5
BID	2	9	0	3	1	2	3	3	8	4	11	12	9	5	6	5	12	8	13	10	3	8	7	5	1	3	11	19	1	13	6	7	8	4	4	11	1	11	10	9	10	11	8	2	3	4	12	8	8
BIK	0	0	0	0	0	0	0	0	0	0	0	0	0	0	0	0	0	0	0	0	0	0	0	0	0	0	0	0	0	0	0	0	0	0	0	0	0	0	0	0	0	0	0	0	0	0	0	0	0
BIN1	0	1	0	0	0	0	0	0	0	0	0	0	0	1	0	0	0	0	0	3	2	0	0	0	0	1	0	0	0	1	0	0	0	1	0	0	0	0	1	1	0	0	0	0	0	0	0	0	0
BIN2	16	120	33	26	10	19	91	37	99	75	244	269	260	270	234	261	182	236	300	294	207	276	256	132	309	213	228	222	242	250	177	234	279	241	190	185	222	274	404	450	383	437	223	199	167	239	271	183	145
BIN3	0	66	36	29	15	11	114	43	60	58	91	111	90	81	69	61	103	106	126	134	59	65	91	87	77	78	88	96	75	98	48	61	86	63	50	77	52	113	161	158	167	156	93	80	82	97	135	63	53
BIRC2	12	65	41	24	36	31	69	28	75	65	70	74	108	99	141	143	89	103	126	113	93	97	81	84	108	114	127	81	155	142	69	68	85	59	60	78	63	66	122	106	103	116	105	79	60	113	44	55	39
BIRC3	12	42	24	28	17	17	46	26	13	35	52	56	78	81	53	86	55	88	42	49	35	48	60	19	115	83	74	57	54	72	72	71	63	70	73	65	62	70	140	142	156	136	89	105	64	46	51	38	25
BIRC5	119	244	155	108	72	107	233	198	263	229	377	483	395	396	436	336	293	286	285	272	333	299	343	242	417	330	450	435	551	571	242	406	405	286	276	318	321	398	439	453	448	513	499	562	399	621	455	188	189
BIRC6	57	130	106	90	81	68	162	80	143	179	120	118	136	115	110	106	92	133	142	102	81	86	100	112	125	104	186	123	151	164	16	36	58	29	34	28	32	49	59	51	115	48	85	102	54	56	78	47	35
BIRC7	0	0	0	0	0	0	0	0	0	0	0	0	0	0	0	0	0	0	0	0	0	0	0	0	0	0	0	0	0	0	0	0	0	0	0	0	0	0	0	0	0	0	0	0	0	0	0	0	0
BIVM	1	11	7	10	0	4	3	2	8	2	7	17	12	7	6	12	7	4	45	10	3	11	5	11	4	16	11	14	15	7	4	11	5	8	0	3	5	13	3	4	12	12	8	0	4	0	0	4	8
BLA-DQB	0	0	0	0	0	0	0	0	0	0	0	0	0	0	0	0	0	0	0	0	0	0	0	0	0	0	0	0	0	0	0	0	0	0	0	0	0	0	0	0	0	0	0	0	0	0	0	0	0
BLCAP	46	111	75	51	34	44	129	77	112	84	223	250	177	226	315	223	120	152	203	187	252	230	345	122	220	138	179	188	311	279	83	240	217	193	189	215	207	169	320	304	313	340	477	374	407	477	279	203	191
BLK	0	0	1	0	0	0	0	0	0	0	0	0	0	0	0	0	0	0	0	0	0	0	0	0	1	0	0	0	0	0	0	0	0	0	0	0	0	0	0	0	0	0	0	0	0	4	0	0	0
BLM	175	417	275	187	202	138	579	216	529	524	600	766	630	572	482	515	663	686	690	670	570	558	437	432	725	686	1080	704	812	702	316	465	524	375	490	455	502	538	859	843	818	680	683	602	574	646	830	473	363
BLMH	23	199	91	97	57	75	193	108	169	192	293	329	361	422	532	394	338	283	376	330	402	374	388	223	488	396	403	323	425	417	298	488	523	382	407	547	565	469	818	926	817	901	731	802	537	745	588	280	252
BLNK	0	0	0	0	0	0	0	0	0	0	0	0	0	0	0	0	0	0	0	0	0	0	0	0	0	0	0	0	0	0	0	0	0	0	0	0	0	0	0	0	0	0	0	0	0	0	0	0	0
BLOC1S1	0	9	12	29	26	14	21	14	11	21	9	5	4	10	18	14	20	16	20	16	11	10	6	9	15	13	14	14	16	14	8	10	15	6	2	4	3	8	6	12	13	7	15	8	3	8	21	1	5
BLOC1S2	1	9	2	8	3	9	7	7	6	8	4	6	5	4	12	10	4	10	9	15	8	4	3	8	4	2	11	6	8	7	2	13	6	4	2	4	5	6	7	12	12	12	9	6	7	5	12	11	7
BLOC1S3	0	0	0	0	0	0	1	0	0	0	0	0	2	0	0	1	1	0	2	0	1	2	0	0	0	0	0	0	0	2	0	1	2	1	0	0	0	0	0	0	0	0	0	0	0	0	0	0	0
BLOC1S4	0	0	1	0	0	1	0	0	0	0	0	0	0	2	1	2	0	0	0	1	0	0	0	1	1	3	4	1	5	2	0	2	6	0	0	0	0	2	0	0	0	3	0	0	0	2	2	0	0
BLOC1S5	46	96	43	39	31	27	110	56	97	76	114	150	154	98	102	86	118	130	134	113	94	101	112	133	145	146	191	180	125	128	125	177	185	177	196	166	131	168	265	365	269	282	209	179	173	190	113	104	108
BLOC1S6	2	15	10	12	4	32	16	5	15	9	24	19	37	20	18	30	34	38	25	19	27	15	9	16	13	15	15	15	18	12	10	25	14	25	26	19	31	36	36	33	54	40	11	25	14	22	15	8	11
BLVRA	0	2	0	0	0	0	3	0	0	0	0	0	1	0	0	0	1	0	0	0	0	0	0	0	0	0	0	0	0	0	0	0	0	0	0	0	0	0	0	1	0	0	0	0	0	0	0	2	0
BLVRB	0	0	0	0	0	0	1	0	0	0	0	0	1	0	0	0	0	0	1	0	1	0	0	0	0	3	0	1	0	0	0	0	0	0	0	0	0	0	0	0	0	0	2	0	0	0	0	0	0
BLZF1	60	238	155	145	73	106	205	119	263	308	211	251	400	364	210	309	359	450	463	354	185	156	272	245	469	367	349	297	363	243	104	198	268	180	221	257	202	296	401	460	439	408	413	225	174	297	501	302	231
BMF	0	1	0	0	1	2	1	2	1	3	1	1	0	3	6	3	0	2	0	8	4	1	2	0	5	5	1	3	2	0	1	11	1	4	3	7	3	3	5	3	8	5	0	0	7	2	0	0	1
BMI1	0	2	1	1	1	2	0	1	2	1	0	1	2	8	2	2	3	5	1	1	0	2	1	2	4	2	1	1	0	1	1	0	4	2	0	0	0	1	1	1	5	5	0	0	0	0	2	0	0
BMP1	0	0	0	0	0	0	0	0	0	0	0	0	0	0	0	1	0	0	1	0	0	0	0	0	0	0	0	0	0	0	0	0	0	0	0	0	0	0	0	0	0	0	0	0	0	0	0	0	0
BMP10	0	0	0	0	0	0	0	0	0	0	0	0	0	0	0	0	0	0	0	0	0	0	0	0	0	0	0	0	0	0	0	0	0	0	0	0	0	0	0	0	0	0	0	0	0	0	0	0	0
BMP15	399	3420	1700	860	593	760	3740	1480	3121	2332	3886	5050	4238	3707	4294	4427	3290	3491	4893	4186	2838	3255	3229	2632	5020	4261	5449	4254	6304	5857	2309	4015	4410	3096	4029	4487	4285	4943	6352	6543	6397	6336	6395	5924	5200	6189	5600	3627	2887
BMP2	0	0	0	0	0	0	0	0	0	0	0	4	1	0	4	0	0	0	0	0	0	0	0	1	1	1	0	5	0	0	0	0	0	0	0	0	1	1	0	0	4	1	0	0	0	0	0	0	0
BMP2K	10	16	13	10	10	7	27	12	28	21	20	12	20	18	17	26	16	20	21	16	9	6	18	15	29	22	39	20	23	18	1	23	18	24	11	11	20	17	7	31	24	22	20	11	5	24	33	7	2
BMP3	0	3	1	1	3	0	2	1	8	1	2	2	5	7	4	7	2	3	12	8	8	2	3	4	1	2	4	1	1	1	3	12	8	10	4	1	11	1	18	9	16	20	5	12	12	4	1	1	4
BMP4	2	14	26	13	4	11	21	22	28	24	32	61	41	34	33	43	19	22	28	22	25	30	22	14	18	49	54	33	38	41	13	27	32	28	31	22	41	29	36	37	45	29	32	31	21	25	27	23	11
BMP5	0	0	0	0	0	0	0	0	0	0	0	0	0	0	0	0	0	0	0	0	0	0	0	0	0	0	0	0	0	0	0	0	0	0	0	0	0	0	0	0	0	0	0	0	0	0	0	0	0
BMP6	10	39	22	15	6	7	46	32	34	27	30	53	21	24	56	39	27	42	36	41	23	23	41	25	36	22	45	40	49	41	25	27	35	23	21	18	27	30	21	27	50	55	44	17	17	37	22	5	13
BMP7	0	1	0	0	0	0	2	2	1	0	0	0	1	0	0	1	0	1	3	3	1	2	1	0	0	2	1	0	2	7	0	3	0	0	0	2	1	0	2	3	0	1	2	6	0	2	0	0	0
BMP8A	0	0	0	0	0	0	0	0	0	0	0	0	0	0	0	0	0	0	0	0	0	0	0	0	0	0	0	0	0	0	0	0	0	0	0	0	0	0	0	0	0	0	0	0	0	0	0	0	0
BMP8B	0	0	0	0	0	0	0	0	0	0	0	0	0	0	0	0	0	0	0	0	0	0	0	0	0	0	0	0	0	0	0	0	0	0	0	0	0	0	0	0	0	0	0	0	0	0	0	0	0
BMPER	0	0	0	0	0	0	0	0	1	0	0	0	0	0	0	0	0	0	1	0	1	2	0	1	0	0	0	1	0	0	0	0	3	1	0	0	0	0	3	0	0	0	0	0	0	0	0	0	0
BMPR1A	138	208	164	148	136	114	459	219	335	323	260	288	524	444	278	258	343	434	427	393	269	269	309	308	493	466	489	304	526	359	178	305	369	291	168	133	137	171	442	431	364	484	394	287	286	320	475	315	313
BMPR1B	60	193	133	174	120	145	235	137	201	209	324	390	291	174	294	288	311	368	366	329	211	240	225	271	311	328	304	215	329	265	159	262	271	208	174	205	222	234	443	488	436	506	333	178	167	236	316	173	148
BMPR2	82	105	74	92	50	76	137	85	110	90	107	99	101	82	126	80	107	103	132	120	52	68	75	58	121	111	179	156	110	65	43	75	75	47	74	41	60	65	78	105	117	110	99	77	78	75	104	63	50
BMS1	3	76	30	49	32	49	100	40	99	53	102	85	138	120	118	116	90	105	111	89	75	95	115	73	109	117	243	153	148	100	43	45	69	44	34	85	53	63	134	99	148	121	153	88	87	66	126	64	80
BMT2	0	3	1	3	2	0	2	1	0	2	6	3	4	5	11	14	5	12	9	6	2	4	10	5	2	6	6	8	7	4	2	17	11	13	2	2	7	9	1	8	6	6	2	3	6	5	1	0	3
BMX	0	0	0	0	0	0	0	0	0	0	0	0	0	0	0	0	0	0	0	0	0	0	0	0	0	1	0	0	0	0	0	0	0	0	0	0	0	0	0	0	0	0	0	0	0	0	0	0	0
BNC1	15	0	3	10	4	6	7	3	5	13	2	5	20	10	25	10	13	14	13	7	7	11	1	2	6	4	7	5	4	16	6	24	15	5	28	15	8	23	26	22	10	14	5	14	10	27	10	2	12
BNC2	23	117	86	90	79	99	122	70	126	131	236	211	242	165	221	218	232	237	241	203	202	201	204	178	295	166	256	222	219	250	226	433	426	254	316	294	287	334	534	524	473	603	404	367	317	352	299	193	138
BNIP1	0	11	8	7	6	6	8	7	8	10	14	11	18	7	23	12	20	19	12	13	13	17	10	21	20	15	19	10	12	9	9	11	12	6	12	23	16	22	28	27	22	25	31	16	14	10	13	13	11
BNIP2	5	5	1	3	3	3	3	1	8	3	2	4	1	4	4	5	6	7	9	3	7	4	6	11	12	4	1	2	7	10	6	5	2	5	0	10	0	1	1	12	8	17	1	0	0	0	16	3	0
BNIP3	3	86	32	13	2	11	52	16	27	32	146	242	235	233	262	245	194	178	196	189	128	128	157	97	419	323	231	173	167	290	117	176	223	183	193	172	178	266	360	362	355	395	290	187	167	261	158	135	127
BNIP3L	22	189	71	159	114	149	145	123	155	180	210	168	211	199	208	201	264	294	289	290	110	185	173	161	281	225	269	230	160	187	131	232	321	216	218	263	204	274	356	358	380	382	215	179	144	216	323	166	161
BNIPL	5	3	2	1	10	14	1	11	5	5	4	12	10	4	4	4	5	2	5	5	2	5	2	0	7	8	5	2	10	9	5	3	1	1	1	0	2	8	7	16	11	9	1	1	2	4	2	2	0
BOC	46	72	54	67	35	42	65	33	73	93	115	105	215	207	185	113	131	149	149	150	164	152	218	70	168	133	151	154	117	123	306	550	549	425	377	570	638	465	941	789	729	833	222	389	299	413	306	285	202
BOD1	169	102	88	203	167	179	154	177	151	167	188	119	114	76	179	123	129	172	148	125	95	87	108	84	129	113	153	133	199	164	47	74	104	70	57	40	43	118	57	94	82	99	123	108	46	119	108	49	86
BOD1L1	16	34	27	30	32	23	34	28	53	43	69	42	85	70	46	30	39	42	101	90	31	31	21	52	68	128	79	70	88	85	14	18	24	14	23	5	22	27	28	36	20	27	57	30	18	30	47	39	22
BOK	0	0	0	0	0	0	0	0	0	0	0	0	0	0	0	0	0	0	0	0	0	0	0	0	0	0	0	0	0	0	0	0	0	0	0	0	0	0	0	0	0	0	0	0	0	0	0	0	0
BOLA	0	0	0	0	0	0	0	0	0	0	0	0	0	0	2	0	0	0	0	0	0	0	0	0	0	0	0	0	0	0	0	0	0	0	0	0	0	0	0	0	0	0	0	1	0	0	0	0	0
BOLA-DMA	0	10	4	1	5	2	3	3	4	7	4	15	14	1	17	9	13	8	8	7	8	1	2	7	5	5	9	1	2	7	7	11	5	1	3	7	3	12	7	6	12	17	12	11	1	3	4	7	8
BOLA-DMB	0	0	0	0	0	0	0	0	0	0	1	0	2	0	0	0	0	0	0	0	0	0	0	0	1	0	0	0	0	0	1	0	0	0	0	0	0	0	0	0	0	0	0	0	0	0	0	0	0
BOLA-DOA	0	0	0	0	0	0	0	0	0	0	0	0	0	0	0	0	0	0	0	0	0	0	0	0	0	0	0	0	0	0	0	0	0	0	0	0	0	0	0	0	0	0	0	0	0	0	0	0	0
BOLA-DOB	0	0	0	0	0	0	0	0	0	0	0	0	0	0	0	0	0	0	0	0	0	0	0	0	0	0	0	0	0	0	0	0	0	0	0	0	0	0	0	0	0	0	0	0	0	0	0	0	0
BOLA-DQA2	0	0	0	0	0	0	0	0	0	0	0	0	0	0	0	0	0	0	0	0	0	0	0	0	0	0	0	0	0	0	0	0	0	0	0	0	0	0	0	0	0	0	0	0	0	0	0	0	0
BOLA-DQA5	0	0	0	0	0	0	0	0	0	0	0	0	0	0	0	0	0	0	0	0	0	0	0	0	0	0	0	0	0	0	0	0	0	0	0	0	0	0	0	0	0	0	0	0	0	0	0	0	0
BOLA-DQB	0	0	0	0	0	0	0	0	0	0	0	0	0	0	0	0	0	0	0	0	0	0	0	0	0	0	0	0	0	0	0	0	0	0	0	0	0	0	0	0	0	0	0	0	0	0	0	0	0
BOLA-DRA	0	0	0	0	0	0	0	0	0	0	0	0	0	0	0	0	0	0	0	0	0	0	0	0	0	0	0	0	0	0	0	0	0	0	0	0	0	0	0	0	0	0	0	0	0	0	0	0	0
BOLA-DRB2	0	0	0	0	0	0	0	0	0	0	0	0	0	0	0	0	0	0	0	0	0	0	0	0	0	0	0	0	0	0	0	0	0	0	0	0	0	0	0	0	0	0	0	0	0	0	0	0	0
BOLA-DRB3	0	0	0	0	0	0	0	0	0	0	0	0	0	0	0	0	0	0	0	0	0	0	0	0	0	0	0	0	0	0	2	0	0	0	0	0	0	0	0	0	0	0	1	0	0	0	0	0	0
BOLA-DYA	0	0	0	0	0	0	0	0	0	0	0	0	0	0	0	0	0	0	0	0	0	0	0	0	0	0	0	1	0	0	0	0	0	0	0	0	0	0	0	0	0	0	0	0	0	0	0	0	0
BOLA-DYB	0	0	0	0	0	0	0	0	0	0	0	0	0	0	0	0	0	0	0	0	0	0	0	0	0	0	0	0	0	0	0	0	0	0	0	0	0	0	0	0	0	0	0	0	0	0	0	0	0
BOLA-NC1	0	0	0	0	0	0	0	0	0	0	0	0	0	0	0	0	0	0	0	0	0	0	0	0	0	0	0	0	0	0	0	0	0	0	0	0	0	0	0	0	0	0	0	0	0	0	0	0	0
BOLA1	0	1	1	0	3	1	2	1	1	8	2	2	6	2	1	4	7	1	6	11	1	0	2	1	14	7	3	1	2	1	0	0	2	0	2	4	4	5	7	0	8	4	0	2	0	2	0	1	1
BOLA2B	0	7	19	15	10	19	28	17	11	15	35	49	36	34	50	34	20	35	43	35	21	17	44	22	47	30	27	17	41	48	7	14	17	17	7	14	14	17	30	34	50	36	32	23	11	36	13	9	6
BOLA3	7	11	11	45	17	24	29	8	17	20	11	11	14	9	12	23	11	19	20	27	4	9	12	6	22	14	14	15	9	9	3	14	9	12	8	4	6	12	14	8	16	9	13	2	6	12	2	2	2
BOLL	22	30	26	31	27	16	49	44	35	63	26	28	57	38	43	16	53	45	52	58	33	32	42	37	59	53	46	57	47	49	21	29	30	29	49	36	39	60	53	66	65	61	40	23	24	33	59	48	52
BOP1	0	0	0	0	0	0	3	0	6	4	3	4	5	4	17	3	3	9	8	3	4	9	9	2	5	5	8	1	0	12	4	5	14	11	1	2	11	12	1	15	9	23	0	2	6	19	0	0	1
BORA	671	907	744	787	522	517	1064	889	1384	1037	589	710	979	812	646	777	857	967	1178	822	717	842	739	736	1235	1095	1282	1090	1392	1153	237	373	529	379	386	365	316	507	700	757	736	723	795	525	475	675	819	446	459
BORCS5	10	69	47	31	29	36	69	52	79	74	86	79	109	103	155	116	132	137	144	139	82	112	118	89	187	162	116	121	105	122	65	82	112	101	54	92	57	93	176	203	175	206	138	99	70	131	211	88	98
BORCS6	0	0	0	0	0	3	0	0	0	0	1	0	1	1	0	2	0	2	0	0	0	0	0	2	0	0	3	0	0	0	0	9	0	2	5	10	5	3	2	1	4	10	0	4	3	4	7	0	2
BORCS7	15	18	11	19	31	26	20	24	28	33	11	19	19	27	24	19	14	11	28	33	5	20	12	7	8	26	32	16	32	31	5	5	14	16	12	11	14	8	13	13	6	13	23	21	10	32	27	11	18
BORCS8	2	2	0	3	1	5	0	4	2	1	8	4	1	3	7	3	10	11	2	2	3	2	2	2	6	3	5	2	1	1	3	7	7	3	1	6	3	4	4	4	7	8	3	0	5	8	1	1	6
BOSTAUV1R403	0	0	0	0	0	0	0	0	0	0	0	0	0	0	0	0	0	0	0	0	0	0	0	0	0	0	0	0	0	0	0	0	0	0	0	0	0	0	0	0	0	0	0	0	0	0	0	0	0
BOSTAUV1R404	0	0	0	0	0	0	0	0	0	0	0	0	0	0	0	0	0	0	0	0	0	0	0	0	0	0	0	0	0	0	0	0	0	0	0	0	0	0	0	0	0	0	0	0	0	0	0	0	0
BOSTAUV1R414	0	0	0	0	0	0	0	0	0	0	0	0	0	0	0	0	0	0	0	0	0	0	0	0	0	0	0	0	0	0	0	0	0	0	0	0	0	0	0	0	0	0	0	0	0	0	0	0	0
BOSTAUV1R416	0	0	0	0	0	0	0	0	0	0	0	0	0	0	0	0	0	0	0	0	0	0	0	0	0	0	0	0	0	0	0	0	0	0	0	0	0	0	0	0	0	0	0	0	0	0	0	0	0
BOSTAUV1R417	1	0	0	0	4	1	1	1	5	0	4	3	6	2	4	7	2	1	1	2	0	1	3	3	1	0	0	5	4	8	0	0	1	0	0	0	0	0	4	8	2	4	1	0	0	3	3	10	0
BOSTAUV1R418	0	0	0	0	0	0	0	0	0	0	0	0	0	0	0	0	0	0	0	0	0	0	0	0	0	0	0	0	0	0	0	0	0	0	0	0	0	0	0	0	0	0	0	0	0	0	0	0	0
BOSTAUV1R419	0	0	0	0	0	0	0	0	0	0	0	0	0	0	0	0	0	0	0	0	0	0	0	0	0	0	0	0	0	0	0	0	0	0	0	0	0	0	0	0	0	0	0	0	0	0	0	0	0
BOSTAUV1R424	0	0	0	0	0	0	0	0	0	0	0	0	0	0	0	0	0	0	0	0	0	0	0	0	0	0	0	0	0	0	0	0	0	0	0	0	0	0	0	0	0	0	0	0	0	0	0	0	0
BOSTAUV1R425	0	0	0	0	0	2	0	0	0	1	0	1	0	0	0	0	0	0	0	0	1	0	1	0	1	1	0	0	0	0	0	0	0	1	0	0	0	0	3	0	2	0	6	0	0	0	0	0	0
BOSTAUV1R426	0	0	0	0	0	0	0	0	0	0	0	0	0	0	0	0	0	0	0	0	0	0	0	0	0	0	0	0	0	0	0	0	0	0	0	0	0	0	0	0	0	0	0	0	0	0	0	0	0
BOTA-T2R10B	0	0	0	0	0	0	0	0	0	0	0	0	0	0	0	0	0	0	0	0	0	0	0	0	0	0	0	0	0	0	0	0	0	0	0	0	0	0	0	0	0	0	0	0	0	0	0	0	0
BPGM	604	537	426	471	656	387	568	420	673	753	557	746	616	513	353	465	331	405	594	476	289	395	346	328	709	652	589	498	966	895	211	320	419	295	299	305	245	448	483	560	559	517	788	575	391	619	602	337	317
BPHL	15	24	10	18	6	17	23	23	13	37	43	60	26	27	54	51	34	49	42	33	39	38	53	29	31	21	26	33	49	35	10	18	22	16	24	36	23	28	57	44	48	73	38	33	21	50	24	13	26
BPI	0	0	0	0	0	1	1	0	0	0	0	0	0	1	0	0	0	0	0	0	0	0	0	0	0	0	0	0	1	0	0	0	0	0	0	0	0	0	0	0	0	0	0	0	1	0	0	0	0
BPIFA1	0	0	0	0	0	0	0	0	0	0	0	0	0	0	0	0	0	0	0	0	0	0	0	0	0	0	0	0	0	0	0	0	0	0	0	0	0	0	0	0	0	0	0	0	0	0	0	0	0
BPIFA2A	0	0	0	0	0	0	0	0	0	0	0	0	0	0	0	0	0	0	0	0	0	0	0	0	0	0	0	0	0	0	0	0	0	0	0	0	0	0	0	0	0	0	0	0	0	0	0	0	0
BPIFA2B	0	0	0	0	0	0	0	0	0	0	0	0	0	0	0	0	0	0	0	0	0	0	0	0	0	0	0	0	0	0	0	0	0	0	0	0	0	0	0	0	0	0	0	0	0	0	0	0	0
BPIFA2C	0	0	0	0	0	0	0	0	0	0	0	0	0	0	0	0	0	0	0	0	0	0	0	0	0	0	0	0	0	0	0	0	0	0	0	0	0	0	0	0	0	0	0	0	0	0	0	0	0
BPIFA2D	0	0	0	0	0	0	0	0	0	0	0	0	0	0	0	0	0	0	0	0	0	0	0	0	0	0	0	0	0	0	0	0	0	0	0	0	0	0	0	0	0	0	0	0	0	0	0	0	0
BPIFA3	0	0	0	0	0	0	0	0	0	0	0	0	0	0	0	0	0	0	0	0	0	0	0	0	0	0	0	0	0	0	0	0	0	0	0	0	0	0	0	0	0	0	0	0	0	0	0	0	0
BPIFA4	0	0	0	0	0	0	0	0	0	0	0	0	0	0	0	0	0	0	0	0	0	0	0	0	0	0	0	0	0	0	0	0	0	0	0	0	0	0	0	0	0	0	0	0	0	0	0	0	0
BPIFB1	0	0	0	1	0	1	0	0	0	0	0	0	0	0	0	0	0	0	0	0	0	0	0	0	0	0	0	0	0	0	0	0	0	0	0	0	0	0	0	0	0	0	0	0	0	0	0	0	0
BPIFB2	0	0	0	0	0	0	0	0	0	0	0	0	0	0	0	0	0	0	0	0	0	0	0	0	0	0	0	0	0	0	0	0	0	0	0	0	0	0	0	0	0	0	0	0	0	0	0	0	0
BPIFB3	0	0	0	0	0	0	0	0	0	0	0	0	0	0	0	0	0	0	0	0	0	0	0	0	0	0	0	0	0	0	0	0	0	0	0	0	0	0	0	0	0	0	0	0	0	0	0	0	0
BPIFB4	2	0	0	0	0	0	0	0	0	0	0	0	0	0	0	0	0	0	0	0	0	0	0	0	0	0	0	0	0	0	0	0	0	0	0	0	0	0	0	0	0	0	0	0	0	0	0	0	0
BPIFB5	0	0	0	0	0	0	0	0	0	0	0	0	0	0	0	0	0	0	0	0	0	0	0	0	0	0	0	0	0	0	0	0	0	0	0	0	0	0	0	0	0	0	0	0	0	0	0	0	0
BPIFB6	0	0	0	0	0	0	0	0	0	0	0	0	0	0	0	0	0	0	0	0	0	0	0	0	0	0	0	0	0	0	0	0	0	0	0	0	0	0	0	0	0	0	0	0	0	0	0	0	0
BPIFC	0	0	0	0	0	0	0	0	0	2	0	0	0	0	0	0	0	0	0	0	0	0	0	0	0	0	0	0	0	0	0	0	0	0	0	0	0	0	0	0	0	0	0	0	0	0	0	0	4
BPNT1	29	56	53	69	34	94	52	57	83	71	80	53	88	95	104	112	124	165	138	106	72	90	69	92	149	134	83	93	61	75	38	67	94	51	66	90	66	115	167	200	158	148	108	54	42	71	131	83	53
BPTF	22	66	19	36	11	22	60	33	65	34	84	90	65	35	76	34	69	77	79	94	38	49	45	58	50	45	67	39	101	70	14	9	29	14	24	17	19	32	55	50	39	56	40	47	25	31	67	24	28
BRAF	12	41	18	22	20	17	50	16	36	36	48	67	45	44	84	46	55	56	54	57	34	31	61	40	54	57	39	43	56	47	45	97	85	53	63	84	54	80	91	138	91	139	48	64	54	58	62	33	16
BRAP	12	92	27	24	7	16	72	23	42	41	201	221	193	139	222	199	184	162	173	143	221	171	185	131	192	146	163	105	138	152	135	187	228	131	168	261	248	161	345	337	318	308	230	320	215	292	69	116	95
BRAT1	0	0	0	0	0	0	1	0	1	0	5	2	1	0	0	2	1	1	2	0	0	1	3	0	1	0	3	0	0	0	0	1	2	0	0	0	2	3	4	2	2	3	0	2	2	4	0	4	0
BRB	0	0	0	0	0	0	0	0	0	0	0	0	0	0	0	0	0	0	0	0	0	0	0	0	0	0	0	0	0	0	0	0	0	0	0	0	0	0	0	0	0	0	0	0	0	0	0	0	0
BRCA1	137	491	186	148	114	133	467	248	458	398	446	564	577	418	392	427	452	519	612	527	358	519	361	449	613	522	627	420	811	665	118	171	195	117	128	155	185	159	314	327	307	267	477	341	293	430	398	209	208
BRCA2	654	1167	450	573	284	407	992	629	788	660	1022	979	1062	614	951	977	936	1175	1286	1199	728	935	718	788	854	849	1323	830	1131	889	257	333	392	269	293	286	290	356	651	564	596	602	848	664	505	780	637	381	306
BRCC3	27	105	27	47	27	23	116	69	125	77	158	169	115	106	132	126	100	147	146	104	103	127	63	82	171	158	176	124	153	148	82	98	101	89	71	80	70	114	143	137	127	138	205	143	85	103	157	72	76
BRD1	19	32	20	23	19	16	43	37	42	22	43	29	24	22	61	35	42	43	33	40	21	20	40	24	44	28	44	38	45	41	9	21	23	27	9	4	9	15	4	18	17	17	13	10	16	15	10	9	3
BRD2	34	64	52	31	20	13	54	29	55	47	236	287	235	216	365	333	164	183	196	191	393	449	298	128	255	148	179	135	192	249	157	307	216	187	190	248	221	223	445	330	371	358	335	384	436	406	284	163	188
BRD3	9	21	17	7	5	10	44	17	36	21	103	110	97	83	131	101	108	79	93	109	81	92	97	53	148	103	90	73	116	148	42	92	93	57	30	59	78	68	67	101	130	95	69	83	64	90	30	44	37
BRD3OS	0	4	0	1	0	0	2	3	2	1	6	5	9	13	10	6	14	6	13	15	2	7	7	3	7	14	22	10	1	8	9	16	16	6	9	3	15	13	13	23	23	19	15	14	13	18	5	8	3
BRD4	19	47	27	36	27	16	41	20	67	51	108	130	84	88	186	73	71	68	98	77	58	64	79	54	54	72	82	85	105	95	39	73	65	31	51	49	56	77	88	66	67	76	89	76	58	52	87	63	46
BRD7	268	253	268	235	247	162	268	318	336	369	284	280	314	287	393	377	249	301	438	433	205	247	274	272	533	420	475	388	543	540	153	296	524	452	129	206	246	508	310	300	376	525	379	308	281	672	348	135	119
BRD8	30	104	37	36	18	37	83	26	60	47	129	110	148	106	192	202	176	273	277	261	141	174	163	149	120	136	133	90	153	120	100	151	148	98	100	183	135	118	396	386	347	389	137	99	93	136	189	107	99
BRD9	4	21	20	8	7	6	29	18	31	27	32	70	60	61	160	144	73	89	95	95	79	93	121	65	98	96	114	101	118	134	28	67	141	98	25	27	76	152	44	85	162	183	62	55	89	173	37	17	27
BRDT	0	3	4	3	9	2	3	7	4	9	3	1	0	11	8	6	8	2	7	4	2	10	5	7	2	1	2	1	5	9	1	5	1	6	5	5	8	7	10	6	6	6	1	5	1	5	3	0	0
BREH1	0	0	0	0	0	0	0	0	0	0	0	0	0	0	0	0	0	0	0	0	0	0	0	0	0	0	0	0	0	0	0	0	0	0	0	0	0	0	0	0	0	0	0	0	0	0	0	0	0
BRF1	0	0	0	0	0	0	0	0	0	0	0	0	1	2	0	0	1	1	0	0	1	0	0	1	0	0	2	0	0	0	0	0	2	3	0	0	3	1	1	0	0	2	0	0	0	5	0	0	0
BRF2	0	1	1	2	1	0	1	2	1	0	0	3	5	2	9	10	0	3	2	5	7	4	2	4	1	5	3	6	0	3	13	15	17	2	1	11	24	7	21	34	24	22	3	0	10	4	10	4	2
BRI3	18	18	11	13	12	10	25	7	10	18	11	14	25	19	18	20	11	17	16	16	12	12	30	13	53	50	27	20	53	69	11	18	22	13	7	9	7	35	21	22	17	44	30	19	21	52	16	7	7
BRI3BP	26	16	17	23	16	24	56	24	56	63	57	94	130	96	86	61	55	57	86	80	56	56	50	34	80	99	104	83	66	109	23	87	117	77	31	47	71	103	32	44	109	92	67	62	65	114	32	19	29
BRICD5	0	0	1	0	0	0	0	0	0	0	0	0	0	0	0	0	0	0	0	0	0	0	0	0	0	0	0	0	0	0	0	0	0	0	0	0	0	1	0	3	1	0	1	0	0	0	3	0	0
BRINP1	0	0	0	0	0	0	2	0	0	0	2	0	1	4	0	0	4	0	1	5	4	0	0	0	3	3	10	3	1	0	5	10	2	0	0	3	1	0	5	4	1	6	1	0	0	3	0	0	0
BRINP2	0	34	14	11	6	12	36	13	27	36	81	98	78	112	128	111	88	103	89	96	161	146	191	57	94	88	83	90	56	80	249	429	391	277	135	283	276	244	715	688	540	662	130	235	230	280	243	174	128
BRINP3	0	0	0	0	0	0	0	1	1	1	0	0	0	0	4	0	1	1	5	12	1	4	0	1	0	0	1	1	0	0	2	3	5	5	0	0	0	0	0	0	0	2	5	7	1	0	8	1	0
BRIP1	107	294	121	174	145	140	340	170	360	292	269	244	329	351	194	248	318	322	348	305	258	297	257	263	503	413	415	301	346	284	163	290	336	252	211	221	204	369	478	529	469	504	396	377	287	415	416	220	198
BRIX1	280	587	270	742	679	738	557	538	621	711	471	450	647	534	587	543	552	640	706	549	324	485	511	449	635	621	791	511	676	554	342	542	762	528	412	405	413	643	1002	950	954	1021	717	593	341	598	672	292	280
BRK1	64	165	84	106	100	136	149	82	153	124	187	236	231	182	340	302	198	272	297	223	142	200	210	165	252	205	282	218	261	301	100	178	255	155	159	176	157	259	322	368	345	329	391	260	157	341	205	100	147
BRMS1	0	2	5	6	1	7	16	8	8	15	23	21	23	27	59	43	29	27	35	29	19	24	18	17	31	17	24	31	15	13	25	46	56	36	31	38	41	36	93	98	84	91	28	26	15	24	35	33	25
BRMS1L	75	116	49	54	65	62	99	71	79	70	85	124	177	146	177	145	101	115	134	107	84	107	109	74	171	134	150	148	211	187	69	154	162	130	127	110	118	121	201	177	193	202	208	191	153	207	159	108	83
BROX	27	8	6	122	10	92	91	95	28	35	10	13	44	41	64	62	57	51	83	80	37	48	44	41	38	58	46	56	40	40	16	18	36	12	52	76	46	82	36	34	48	33	57	26	34	24	12	19	13
BRPF1	1	10	7	2	2	3	8	1	6	3	17	12	16	38	43	26	24	45	35	37	29	38	41	27	19	8	16	20	7	10	34	60	52	39	28	71	89	45	142	127	93	147	28	52	65	53	32	15	25
BRPF3	25	94	65	91	44	73	146	87	124	133	217	297	400	462	433	334	299	332	384	373	296	288	441	234	487	329	360	433	167	244	812	1488	1285	909	1164	1471	1385	1423	2275	2276	1752	2217	888	987	751	916	1309	639	595
BRS3	0	0	0	0	0	0	0	0	0	0	0	0	0	0	0	0	0	0	0	0	0	0	0	0	0	0	0	0	0	0	0	0	0	0	0	0	0	0	0	0	0	0	0	0	0	0	0	0	0
BRSK1	0	0	1	0	0	0	0	0	0	0	0	0	0	0	1	0	0	0	1	0	0	0	0	0	0	0	0	0	0	0	0	0	1	1	0	0	0	0	0	0	0	0	0	0	0	0	0	0	0
BRSK2	0	0	0	0	0	0	0	0	0	0	0	0	1	1	0	1	1	0	2	0	0	0	0	0	1	0	0	0	0	0	0	0	0	0	0	1	4	0	0	0	0	0	0	0	0	0	0	0	0
BRWD1	55	103	102	84	31	53	164	86	163	147	150	186	222	186	184	140	162	212	226	198	168	172	183	161	219	181	234	212	265	220	67	108	135	67	45	61	72	72	107	239	240	229	137	131	133	186	73	43	54
BRWD3	9	45	31	22	20	22	31	19	48	50	38	36	44	36	66	49	62	61	45	40	43	26	30	29	26	43	61	29	51	31	10	20	30	26	18	49	24	43	42	46	55	45	46	13	13	43	31	28	24
BSCL2	2	13	6	13	1	7	32	18	21	28	28	48	22	51	50	38	26	44	37	29	13	21	20	18	45	48	41	35	30	29	28	27	64	31	21	22	37	21	32	64	77	66	30	41	41	45	44	49	21
BSDC1	4	10	13	11	9	6	9	6	15	18	16	16	21	18	31	12	21	14	32	25	19	14	20	16	13	24	16	8	20	12	23	28	30	21	27	24	35	30	49	44	44	59	22	25	32	31	20	20	16
BSG	6	74	38	22	11	10	57	30	46	32	120	142	149	121	158	125	97	112	131	115	71	60	96	75	140	106	123	117	118	164	68	144	192	131	68	104	102	109	189	200	187	185	187	161	88	175	102	74	56
BSN	0	1	0	0	0	0	0	0	0	0	0	4	0	0	1	2	0	2	4	1	0	0	0	0	0	1	0	0	0	0	2	0	2	0	0	2	0	1	0	3	1	2	3	1	0	0	3	0	1
BSND	0	0	0	0	0	0	0	0	0	0	0	0	0	2	0	0	0	0	1	0	0	0	0	0	0	0	0	0	0	0	0	0	1	0	0	0	0	0	0	0	0	0	0	0	0	0	0	0	0
BSP1	31	20	70	70	43	180	63	42	9	26	22	16	37	27	24	17	20	35	19	23	13	28	9	17	12	24	27	42	6	14	20	12	28	25	8	6	10	7	27	31	35	31	51	32	14	45	13	15	23
BSP3	0	1	0	3	1	0	1	2	0	1	2	2	0	0	0	0	1	0	0	1	0	1	0	0	0	0	1	1	0	0	0	2	0	0	0	0	0	0	0	0	0	0	1	0	0	3	0	0	0
BSP5	0	0	0	0	0	0	0	0	0	0	0	0	0	0	0	0	0	0	0	0	0	0	0	0	0	0	0	0	0	0	0	0	0	0	0	0	0	0	0	0	0	0	0	0	0	0	0	0	0
BSPRY	0	10	12	3	0	6	20	4	20	21	81	91	96	122	93	71	52	40	83	63	79	63	82	45	124	111	145	127	91	80	55	92	158	106	28	124	119	132	75	259	242	225	118	166	96	201	28	11	29
BST1	0	0	0	0	1	1	2	2	0	0	2	0	0	2	1	2	0	1	0	0	0	0	0	0	2	1	0	0	0	0	0	0	0	1	0	0	0	1	0	1	0	1	0	0	0	0	0	0	0
BSX	0	5	2	2	8	8	3	7	9	13	6	10	6	15	16	25	18	24	7	3	7	2	13	7	14	12	8	12	6	9	14	18	24	17	11	12	13	22	18	17	14	26	14	15	11	15	11	7	11
BTAF1	15	82	65	61	61	106	96	54	104	111	93	89	140	90	114	115	146	168	109	88	106	158	121	94	121	128	166	124	130	147	50	42	78	82	24	52	76	56	68	139	99	116	102	114	100	100	57	31	17
BTBD1	0	1	0	0	0	0	1	0	0	0	0	2	1	1	0	0	0	0	0	0	1	0	7	0	0	0	1	0	1	0	0	0	1	0	0	0	0	0	0	0	0	0	0	0	1	0	0	0	0
BTBD10	316	783	660	404	316	372	957	517	899	627	1171	1338	1095	1066	1188	1167	888	851	1097	1043	978	1166	1137	862	1340	1077	1329	1181	1572	1754	571	1001	1035	808	1061	1134	1165	1336	1347	1360	1227	1276	1461	1356	1055	1586	1333	804	665
BTBD11	0	2	0	0	3	1	0	0	0	0	0	1	0	0	0	1	2	0	0	0	0	0	2	0	0	3	2	4	1	0	3	0	4	1	3	0	3	2	1	1	3	2	0	1	3	5	0	0	1
BTBD16	2	2	0	0	0	2	0	2	2	3	3	0	0	1	0	0	1	0	1	3	0	0	0	0	0	0	0	1	0	2	0	0	2	1	1	0	2	0	0	3	0	1	2	0	0	0	1	0	0
BTBD17	0	0	0	0	0	0	0	1	0	0	0	0	0	0	1	1	0	0	0	0	0	0	0	0	0	0	0	0	0	0	0	0	0	0	0	0	0	0	0	0	0	0	0	0	0	0	0	0	0
BTBD19	4	5	6	1	1	3	2	2	5	8	13	12	7	14	20	26	14	12	9	20	27	12	13	4	20	9	9	4	11	15	7	20	14	9	12	18	5	22	22	20	24	35	22	32	13	17	6	3	13
BTBD2	3	1	6	2	0	1	3	5	10	1	13	21	6	13	31	9	8	16	12	21	11	12	13	6	6	13	12	16	16	9	0	6	10	5	2	5	3	3	12	12	4	7	15	13	4	6	7	3	5
BTBD3	1	4	7	5	4	4	6	5	4	4	6	8	9	8	14	11	7	18	13	10	7	4	17	8	8	9	13	14	10	6	4	16	12	19	3	9	19	36	3	6	12	35	0	5	2	4	2	10	6
BTBD6	3	4	6	3	0	2	9	6	11	5	17	10	10	6	18	14	6	8	11	8	6	6	6	7	20	12	21	6	25	15	9	7	8	4	3	9	4	6	5	5	7	8	10	15	11	2	10	1	3
BTBD7	4	13	16	15	2	6	17	16	16	22	27	28	57	30	69	42	26	39	40	31	18	19	37	27	20	32	29	34	31	19	11	58	29	34	24	18	34	30	25	21	47	42	22	6	15	28	33	16	11
BTBD8	30	38	21	25	12	22	58	15	46	52	41	45	66	33	39	60	67	60	66	66	36	52	41	50	58	50	66	36	63	53	41	31	29	25	29	24	18	28	65	64	79	21	48	50	60	61	59	30	51
BTBD9	39	214	126	95	54	89	225	103	200	205	416	434	441	374	261	239	190	214	221	211	220	193	207	156	560	492	507	390	429	469	347	546	647	473	252	405	416	485	654	880	800	906	582	614	508	759	366	265	308
BTC	0	0	0	0	0	0	0	0	0	0	0	0	0	0	0	0	0	0	0	0	0	0	0	0	0	0	0	0	0	0	0	0	0	0	0	0	0	0	0	0	0	0	0	0	0	0	0	0	0
BTD	0	0	0	3	0	3	7	2	2	2	4	5	6	7	6	13	7	9	3	6	6	8	4	7	6	6	9	1	3	10	9	7	5	10	8	9	7	7	27	28	19	13	7	10	4	6	14	11	9
BTF3	1580	763	708	1136	1691	1023	823	755	1251	1010	971	1029	1162	1031	1520	1433	879	985	1276	1067	801	969	855	713	1226	1019	1085	911	1525	1717	473	829	1128	692	585	544	548	860	1280	1300	1456	1420	1532	1072	744	1240	1217	669	647
BTF3L4	40	128	65	209	157	253	87	115	113	122	37	77	77	57	115	102	132	162	154	134	53	57	97	69	112	116	146	122	82	70	59	48	73	60	105	84	89	146	116	149	188	142	97	62	53	76	119	71	68
BTG1	28	73	28	33	38	15	25	29	34	34	17	13	18	12	45	20	30	20	30	20	12	18	8	21	10	14	16	9	23	10	6	4	10	5	3	5	8	7	14	4	11	6	4	8	5	9	3	1	2
BTG2	0	0	0	0	0	2	0	0	0	0	1	2	1	0	0	0	1	0	0	0	0	2	1	0	1	1	0	1	0	1	0	0	1	0	0	0	0	0	1	1	0	4	0	0	0	1	0	2	0
BTG3	0	1	0	0	0	2	0	0	0	0	0	0	0	1	0	0	0	0	0	1	0	1	0	0	0	0	0	2	0	0	0	0	0	0	0	0	0	0	3	0	0	0	0	0	1	0	0	0	0
BTG4	27723	29708	25707	48072	57398	43202	39755	48149	54948	55034	20748	26294	32943	26378	27679	29337	25868	32022	40642	32170	16937	20696	23817	21950	32361	29148	36903	30662	36185	36013	15463	24436	32832	23785	22082	22636	22123	32963	36018	40574	40615	39093	30985	19705	13664	24245	35632	19911	19280
BTK	37	118	51	73	72	41	92	54	149	56	44	65	171	190	80	79	80	69	161	121	65	68	73	50	144	97	154	143	105	110	129	145	183	134	177	152	153	195	311	290	328	352	187	135	92	135	98	43	61
BTLA	0	0	0	0	0	0	0	0	0	0	0	0	0	0	0	0	0	0	0	0	0	0	0	0	0	0	0	0	0	0	0	0	0	0	0	0	0	0	0	0	0	0	0	0	0	0	0	0	0
BTN1A1	0	0	0	0	0	0	0	0	0	0	0	0	0	0	0	0	0	0	0	0	0	0	0	0	0	0	0	0	0	0	0	0	0	0	0	0	0	0	0	0	0	0	0	0	0	0	0	0	0
BTN3A3	0	0	0	0	2	0	0	0	0	0	0	0	0	0	0	0	0	0	0	0	0	0	0	0	0	0	0	0	0	0	0	0	0	0	0	0	0	0	0	0	0	0	0	0	0	0	0	0	0
BTNL2	0	0	0	0	0	0	0	0	0	0	0	0	0	0	0	0	0	0	0	0	0	0	0	0	0	0	0	0	0	0	0	0	0	0	0	3	0	0	0	0	0	0	9	7	0	1	0	0	0
BTNL9	0	0	0	0	0	0	0	0	0	0	0	0	0	0	0	0	0	0	0	0	0	0	0	0	0	0	0	0	0	0	0	0	0	0	0	0	0	0	0	0	0	0	0	0	0	0	0	0	0
BTRC	104	463	271	232	130	185	517	270	399	415	574	785	831	852	718	808	756	741	997	877	641	753	680	594	996	734	956	888	806	799	385	619	743	582	528	603	561	691	921	1048	1001	972	866	810	587	874	1225	629	576
BUB1	30	124	61	54	51	48	156	95	108	117	138	190	224	215	140	154	129	158	200	153	122	150	139	110	244	211	289	189	269	219	112	163	189	166	164	141	131	187	275	305	251	255	273	226	181	241	236	119	101
BUB1B	177	231	191	226	161	222	345	150	306	268	302	429	514	459	517	383	286	310	432	404	409	432	494	301	442	419	428	336	449	414	214	428	426	303	251	348	316	305	565	589	455	521	699	682	627	746	383	280	303
BUB3	404	1155	691	1153	996	1080	1493	1176	1327	1383	694	1013	1668	1433	1565	1862	1374	1586	1633	1361	921	1072	1368	1050	1561	1363	1541	1404	1201	1312	1005	1575	1957	1440	1460	1495	1509	1986	2849	3204	3042	2931	1679	1224	898	1451	1452	815	719
BUD13	38	62	53	35	19	33	63	24	120	96	168	190	191	127	165	128	108	113	153	129	93	144	123	124	237	178	194	125	162	187	93	129	150	113	116	155	109	179	228	166	246	244	223	163	120	134	167	119	94
BUD23	22	235	121	203	79	165	232	135	264	224	225	240	309	222	351	362	303	356	416	377	190	226	269	215	448	383	369	265	163	258	75	105	166	92	55	87	73	103	177	215	206	217	259	149	119	173	169	88	88
BUD31	87	232	61	257	213	230	172	191	154	201	139	141	189	119	212	196	157	169	251	201	118	136	125	145	201	181	256	178	201	192	57	110	165	99	79	72	71	138	161	206	179	183	182	105	82	138	105	66	67
BVES	1	1	1	4	1	5	1	0	3	0	0	2	1	3	0	4	9	3	5	0	2	8	1	0	1	0	2	2	6	1	1	11	2	4	5	2	5	3	2	3	1	2	6	7	2	12	2	6	3
BYSL	0	12	9	5	0	0	17	4	11	7	39	31	38	37	39	32	25	46	42	42	22	37	40	12	25	24	19	21	26	34	23	59	90	44	45	46	22	41	93	69	81	103	37	40	30	42	64	34	21
BZW1	90	236	161	122	119	131	237	175	234	166	240	348	318	247	239	301	239	293	256	237	183	277	233	219	265	225	321	303	406	358	188	331	400	232	206	254	273	299	390	423	423	393	393	311	254	384	325	147	167
BZW2	51	77	45	49	30	53	77	45	126	82	113	147	121	89	121	162	177	157	167	175	137	157	157	97	127	117	170	173	105	83	78	117	153	77	90	108	87	131	175	108	148	157	196	105	97	121	199	102	91
BoLA	0	0	0	0	0	0	0	0	0	0	0	0	0	0	0	0	0	0	0	0	0	0	0	0	0	0	0	0	0	0	0	0	0	0	0	0	0	0	0	0	0	0	0	0	0	0	0	0	0
C10H14orf1	14	31	16	19	30	27	14	27	30	22	13	19	15	20	11	16	13	22	18	10	11	10	13	6	18	20	23	25	25	22	5	16	21	19	7	9	11	14	18	27	25	18	33	10	5	20	12	13	12
C10H14orf119	919	242	169	720	706	284	470	428	690	660	245	260	665	602	220	219	230	225	333	316	191	178	180	192	792	621	673	615	637	706	225	333	474	343	366	334	336	567	542	610	637	541	743	468	285	527	493	280	343
C10H14orf39	85	57	16	96	54	34	42	21	48	60	17	30	39	35	11	22	11	14	15	13	25	32	25	10	36	29	39	37	30	26	9	23	47	24	21	21	18	68	19	21	29	25	14	18	2	16	16	14	8
C10H14orf93	0	1	0	0	0	1	1	0	0	0	1	0	1	2	0	0	0	0	0	0	0	1	0	0	0	2	0	3	2	2	0	0	0	2	1	1	0	0	1	0	0	0	1	0	0	0	0	0	1
C10H15orf41	7	43	19	33	44	15	13	8	25	30	39	19	27	33	17	26	20	26	41	34	30	29	36	23	31	35	26	41	24	27	15	25	38	23	28	40	24	47	33	20	29	18	60	28	14	41	32	18	15
C10H15orf48	49	37	9	75	68	62	31	33	36	42	3	6	24	33	15	21	11	33	26	21	2	4	14	6	18	26	25	17	20	21	16	16	19	14	7	2	8	7	28	28	19	23	27	12	12	19	15	13	4
C10H15orf59	0	0	0	0	0	0	0	0	0	0	0	0	0	0	0	0	0	0	0	0	0	1	0	0	1	0	0	0	0	0	1	0	0	0	0	0	0	0	1	0	0	0	0	0	0	0	0	2	0
C10H15orf61	27	33	18	20	26	11	31	31	46	22	38	35	51	41	49	36	22	17	34	35	10	20	22	12	67	44	66	71	92	107	8	19	42	21	9	22	18	31	25	19	33	19	31	29	17	54	4	11	11
C10H15orf62	0	0	0	0	0	0	0	0	0	0	0	0	0	0	0	2.13	0	0	0	0	0.14	0	0	0	0	0	0	0	0	0	0	0	0	0	0	0	0	0.86	0	0	0	0	0	0	0	0	0	0	0
C10H15orf65	12	4	3	6	4	10	9	2	2	7	3	1	3	10	1	6	2	3	6	7	4	0	0	2	7	1	6	3	4	11	3	2	2	5	1	3	1	3	2	0	2	0	4	1	2	2	3	1	1
C11H2orf15	0	0	0	0	0	0	0	0	0	0	0	0	0	0	0	0	0	0	0	0	0	0	0	0	0	0	0	0	0	0	0	0	0	0	0	0	0	0	0	0	0	0	0	0	0	0	0	0	0
C11H2orf16	0	5	4	2	0	1	1	2	6	7	1	5	4	6	3	10	1	7	8	6	2	0	4	0	7	6	8	5	9	9	1	8	5	6	4	0	0	2	8	5	4	10	4	0	2	6	3	0	10
C11H2orf40	0	0	0	0	0	0	0	0	0	0	0	0	0	0	0	0	0	0	0	0	0	1	0	0	0	0	0	0	1	0	0	0	0	0	0	0	0	0	0	0	0	0	0	0	0	0	0	0	0
C11H2orf42	19	81	63	32	38	32	99	31	99	103	116	121	160	138	129	171	90	129	118	103	87	111	110	52	199	141	140	148	147	197	99	166	179	137	154	172	173	188	249	227	226	237	257	208	168	292	290	107	127
C11H2orf49	20	44	21	84	38	55	52	45	41	76	34	31	46	50	77	49	55	69	82	62	27	34	44	46	59	73	65	46	39	44	22	38	45	44	32	33	45	50	89	86	75	119	66	61	35	56	25	24	19
C11H2orf50	0	0	0	0	0	0	0	0	0	0	0	0	0	0	0	0	0	0	0	0	0	0	0	0	0	0	0	0	0	0	0	0	0	0	0	0	0	0	0	0	0	0	0	0	0	0	0	0	0
C11H2orf68	0	8	8	9	2	4	14	7	8	17	13	11	10	8	11	14	3	5	19	15	8	5	1	8	15	8	32	33	23	12	4	13	10	4	10	16	2	13	8	8	27	15	5	25	14	25	7	8	2
C11H2orf70	0	0	0	0	0	0	0	0	0	0	0	0	1	0	0	0	0	0	0	0	0	0	0	0	0	0	0	0	0	0	0	0	0	0	0	0	0	0	0	0	0	0	0	0	0	0	0	0	0
C11H2orf71	0	0	0	0	0	0	0	0	0	1	0	0	1	0	2	2	1	0	1	0	0	0	0	1	0	0	0	0	0	0	0	0	1	0	0	0	0	0	0	0	0	0	0	0	0	0	0	0	0
C11H2orf73	0	0	0	0	0	0	0	0	1	0	0	0	0	0	0	0	0	0	0	0	0	0	0	0	0	2	0	0	0	1	0	0	0	0	0	0	0	0	0	0	0	1	0	0	0	0	0	0	0
C11H2orf74	0	0	0	0	0	0	0	0	0	0	0	0	0	0	0	0	0	0	0	0	0	0	0	0	0	0	0	0	0	0	0	0	0	0	0	0	0	0	0	0	0	0	0	0	0	0	0	0	0
C11H2orf78	0	0	0	0	0	0	0	0	0	0	0	0	0	0	0	0	0	0	0	0	0	0	0	0	0	0	0	0	0	0	0	0	0	0	0	0	0	0	0	0	0	0	0	0	0	0	0	0	0
C11H2orf81	0	0	0	1	0	0	1	0	0	0	2	0	0	0	0	1	2	1	0	0	1	0	0	0	0	0	1	0	0	0	0	0	0	0	0	0	2	0	0	0	0	0	0	0	0	0	0	0	0
C11H2orf92	0	1	1	4	6	2	5	2	1	9	8	3	3	2	5	1	5	2	3	6	4	0	1	1	20	9	6	6	2	10	2	5	3	0	0	0	4	10	6	5	12	9	12	2	3	12	5	7	8
C11H9orf116	1	12	2	13	0	2	6	3	2	5	1	4	1	6	11	3	7	4	8	2	4	1	8	5	13	11	11	3	4	6	1	10	8	13	1	2	5	4	7	10	8	15	5	1	2	5	14	9	4
C11H9orf16	0	7	5	9	1	4	13	5	9	14	4	8	9	8	8	5	5	3	3	9	2	2	3	5	11	5	9	7	4	8	4	2	5	6	2	1	11	2	4	9	4	7	7	3	2	3	1	7	2
C11H9orf50	0	1	0	0	0	0	0	0	0	0	0	0	0	0	0	0	0	0	2	1	0	0	0	0	0	0	0	0	1	0	0	0	0	0	0	0	0	0	0	0	0	0	0	1	0	0	0	0	0
C11H9orf78	41	80	63	77	47	45	97	63	73	112	108	120	163	124	129	125	140	152	190	146	74	95	110	78	184	158	181	111	151	150	89	84	166	108	125	115	102	162	202	205	246	208	169	112	96	123	152	79	86
C12H13orf42	0	0	0	0	0	0	0	0	0	0	0	0	0	0	0	0	0	0	0	0	0	0	0	0	0	0	0	0	0	0	0	0	0	0	0	0	0	0	0	1	0	0	0	0	0	0	0	1	0
C12H13orf46	0	0	0	0	0	0	0	0	0	0	0	0	0	0	0	0	0	0	0	0	0	0	0	0	0	0	0	0	0	0	0	0	0	0	0	0	0	0	0	0	0	0	0	0	0	0	0	0	0
C13H10orf113	0	0	0	0	0	0	0	0	0	0	0	0	0	0	0	0	0	0	0	0	0	0	0	0	0	0	0	0	0	0	0	0	0	0	0	0	0	0	0	0	0	0	0	0	0	0	0	0	0
C13H10orf67	0	0	0	0	0	0	0	0	0	0	0	0	0	0	0	0	0	0	0	0	0	0	0	0	0	0	0	0	0	0	0	0	0	0	0	0	0	0	0	0	0	0	0	0	0	0	0	0	0
C13H20orf141	0	0	0	0	0	0	0	0	0	0	0	0	0	0	0	0	0	0	0	0	0	0	0	0	0	0	0	0	0	0	0	0	0	0	0	0	0	0	0	0	0	0	0	0	0	0	0	0	0
C13H20orf144	0	0	0	0	0	0	0	0	0	0	0	0	0	0	0	0	0	0	0	0	0	0	0	0	0	0	0	0	0	0	0	0	0	0	0	0	0	0	0	0	0	0	0	0	0	0	0	0	0
C13H20orf173	0	0	0	0	0	0	0	0	0	0	0	0	0	0	0	0	0	0	0	0	0	0	0	0	0	0	0	2	0	0	0	0	0	0	0	0	0	0	0	0	0	0	0	0	0	0	0	0	0
C13H20orf194	2	5	3	4	2	3	7	7	5	5	9	8	13	1	8	9	8	6	11	3	5	5	6	6	2	7	10	6	5	3	1	9	5	4	5	9	2	3	3	11	11	10	6	6	5	0	11	8	4
C13H20orf202	0	0	0	0	0	0	0	0	1	0	0	0	0	1	0	0	0	0	0	0	0	0	1	0	0	0	0	0	0	0	0	0	0	0	0	0	0	0	0	1	0	0	0	0	1	1	0	0	0
C13H20orf204	0	0	0	0	0	0	0	0	0	0	0	0	0	0	0	0	0	0	0	0	0	0	0	0	0	0	0	0	0	1	0	0	0	0	0	0	0	0	0	0	0	0	0	0	0	0	0	0	0
C13H20orf27	27	60	53	38	21	9	96	46	90	47	202	201	167	159	269	263	151	166	183	188	174	207	241	142	171	139	241	227	187	259	83	156	192	103	84	120	124	149	235	235	204	265	315	261	180	285	110	70	111
C13H20orf85	0	0	0	0	1	0	0	0	0	0	0	0	0	0	0	0	0	0	0	0	0	0	0	0	0	0	0	0	0	0	0	0	0	0	0	0	0	0	0	0	0	0	0	0	0	0	0	0	0
C13H20orf96	0	1	0	0	1	2	0	1	1	2	0	0	4	0	1	1	0	2	3	5	1	0	0	1	0	1	1	1	0	0	3	0	0	1	1	0	0	0	2	4	4	4	0	0	0	0	0	0	5
C14H8orf33	0	2	2	2	0	0	3	0	0	0	4	2	0	3	2	7	3	2	2	3	5	2	2	4	1	1	12	3	2	2	1	0	1	1	1	4	11	2	5	8	0	5	2	4	3	3	0	0	0
C14H8orf34	1	0	0	0	1	0	1	0	0	2	1	1	1	3	6	4	1	1	1	0	6	2	2	0	0	1	1	11	6	8	3	2	1	2	0	0	0	3	0	5	1	1	0	0	2	4	0	0	0
C14H8orf37	32	100	66	40	54	41	108	75	137	120	120	118	114	113	94	107	111	87	108	83	96	91	128	87	104	117	149	148	162	159	48	104	73	75	91	80	69	105	88	138	139	97	144	158	173	199	152	119	111
C14H8orf59	26	119	76	165	166	166	119	181	92	118	37	29	48	23	42	41	41	42	59	48	20	17	31	31	33	34	102	68	36	38	19	36	31	22	9	3	14	16	28	29	31	31	14	13	8	14	28	10	3
C14H8orf76	157	422	272	441	232	408	439	312	464	474	406	398	533	421	450	469	541	671	679	636	310	399	344	428	614	573	604	473	453	490	165	302	343	273	287	238	272	419	476	589	521	493	526	377	290	447	712	344	302
C14H8orf82	0	0	1	1	0	1	2	0	1	0	0	3	3	1	8	2	0	3	1	4	0	3	1	0	5	5	3	1	4	7	0	0	3	2	0	0	1	8	4	0	5	4	0	3	0	5	3	1	2
C14H8orf88	30	17	10	21	12	15	13	16	25	17	4	19	4	18	18	15	8	12	14	13	5	8	2	3	12	18	27	23	19	26	4	10	15	9	6	10	8	10	6	7	13	13	15	4	9	15	5	8	8
C14H8orf89	8	5	0	5	5	8	0	4	6	11	4	5	7	2	15	16	9	6	16	20	1	8	12	9	9	8	12	10	4	4	1	5	2	5	2	7	0	7	1	1	10	8	6	7	4	7	2	1	8
C15H11orf1	1	2	2	1	0	0	3	0	0	4	0	2	3	5	1	1	0	3	2	7	3	1	1	2	2	5	5	3	4	2	0	0	1	3	2	0	5	1	0	3	5	6	3	2	2	3	0	0	5
C15H11orf16	22	34	35	25	13	36	64	27	50	39	133	152	122	128	190	153	132	138	151	149	171	144	195	72	166	143	144	133	92	100	125	208	223	156	170	228	247	238	435	421	373	444	164	256	184	204	211	176	101
C15H11orf34	0	0	0	0	0	0	0	0	0	0	0	0	0	0	0	1	0	0	0	0	0	0	0	0	0	0	0	0	0	0	0	0	0	0	0	0	0	0	0	0	0	0	0	0	0	0	0	0	0
C15H11orf42	0	0	0	0	0	0	0	0	0	0	0	0	0	0	0	0	0	0	0	0	0	0	0	0	0	0	0	0	0	0	0	0	0	0	0	0	0	0	0	0	0	0	0	0	0	0	0	0	0
C15H11orf49	4	0	1	2	1	2	4	1	0	0	1	0	2	4	0	1	0	1	0	2	0	2	3	0	1	0	3	2	0	1	1	0	2	1	2	2	0	0	0	0	2	3	4	1	0	0	4	3	2
C15H11orf52	4	62	28	47	21	44	57	24	36	63	52	71	74	50	75	70	78	100	134	131	42	54	73	52	77	55	71	41	47	50	34	59	76	42	29	37	55	43	101	172	114	117	78	26	16	35	97	64	56
C15H11orf53	0	0	0	0	0	0	0	0	0	0	0	0	0	0	0	0	0	0	0	0	0	0	0	0	0	0	0	0	0	0	0	0	0	0	0	0	0	0	0	0	0	0	0	0	0	0	0	0	0
C15H11orf58	280	451	328	511	531	538	603	487	573	819	478	553	669	622	551	506	509	531	721	580	396	372	471	370	810	740	959	810	937	710	457	707	833	589	640	532	561	813	825	948	860	810	794	575	410	590	792	485	430
C15H11orf65	0	0	0	1	0	0	0	0	0	0	0	0	0	0	0	0	0	0	0	0	0	0	0	0	0	0	0	0	0	0	0	0	0	0	0	0	0	0	0	0	0	0	0	0	0	0	0	0	0
C15H11orf71	1	14	4	5	4	6	5	4	3	5	6	15	2	7	8	5	3	7	12	4	10	11	5	5	7	3	12	15	8	12	7	4	3	11	10	15	13	12	12	12	14	17	7	7	9	13	11	7	3
C15H11orf74	30	31	41	98	51	82	64	47	67	70	30	46	49	45	52	48	50	42	53	50	22	24	30	28	58	49	59	46	37	48	19	27	32	20	22	21	17	25	40	36	41	46	59	34	30	43	43	14	24
C15H11orf87	0	0	0	0	0	0	0	0	0	0	0	0	0	0	0	0	0	0	0	0	0	0	0	0	0	0	0	0	0	0	0	0	0	0	0	0	0	0	0	0	0	0	0	0	0	0	0	0	0
C15H11orf88	3	1	1	2	1	1	1	0	2	3	1	0	3	2	0	0	3	0	4	0	0	1	1	1	5	7	3	1	4	1	0	1	0	2	0	0	0	0	2	0	0	0	0	3	1	6	2	0	0
C15H11orf91	0	0	0	0	0	0	0	0	0	0	0	0	0	0	0	0	0	0	0	0	0	0	0	0	0	0	0	0	0	0	0	0	0	0	0	0	0	0	0	0	0	0	0	0	0	0	0	0	0
C15H11orf94	0	0	0	0	0	0	0	0	0	0	0	0	0	0	0	0	0	0	0	0	0	0	0	0	0	0	0	0	0	0	0	0	0	0	0	0	0	0	0	0	0	0	0	0	0	0	0	0	0
C15H11orf96	0	0	0	0	0	0	0	0	0	0	0	0	0	0	0	0	0	0	0	1	1	0	0	0	0	0	0	0	1	1	0	0	0	0	0	0	0	0	0	1	1	1	0	0	0	0	0	0	0
C15H11orf97	0	0	0	1	0	0	0	0	0	0	0	0	0	0	0	0	0	0	0	0	0	0	0	0	0	0	0	0	0	0	0	0	0	0	0	0	0	0	0	0	0	0	0	0	0	0	0	0	0
C16H1orf100	0	0	0	0	0	0	0	0	0	0	0	0	0	0	0	0	0	0	0	0	0	0	0	0	0	0	0	0	0	0	0	0	0	0	0	0	0	0	0	0	0	0	0	0	0	0	0	0	0
C16H1orf105	6	2	1	3	4	5	1	0	1	3	1	1	3	5	2	2	5	1	2	2	2	2	1	4	4	0	6	8	2	0	1	7	9	3	3	3	0	3	18	10	12	10	0	3	2	4	1	2	0
C16H1orf112	20	65	55	47	23	36	104	62	84	62	93	99	77	91	80	103	119	141	101	90	76	66	82	78	136	106	159	118	104	80	78	170	175	127	112	134	115	159	214	308	281	251	178	90	111	117	126	80	78
C16H1orf115	0	0	0	0	0	0	0	0	0	0	0	0	0	0	0	0	0	0	0	0	0	0	0	0	0	0	0	0	0	0	0	0	0	0	0	0	0	0	0	0	0	0	0	0	0	0	0	0	0
C16H1orf116	0	1	0	2	0	0	2	0	1	1	8	0	0	1	3	0	0	0	2	2	0	1	2	0	2	0	9	4	8	2	1	7	9	4	0	0	1	0	3	12	1	3	9	0	4	1	8	1	2
C16H1orf158	0	0	0	0	0	0	0	0	0	0	0	0	0	0	0	0	0	0	0	0	0	0	0	0	0	0	0	0	0	0	0	0	0	0	0	0	0	0	0	0	0	0	0	0	0	0	0	0	0
C16H1orf159	0	0	0	0	0	0	3	0	0	0	0	0	1	0	1	1	3	0	0	0	0	0	0	1	1	0	0	0	0	0	0	0	1	0	1	1	3	0	1	0	0	0	0	0	0	0	0	2	0
C16H1orf167	0	0	0	0	0	0	0	0	0	0	0	0	1	0	0	0	0	0	0	0	0	0	0	0	0	1	0	0	0	0	0	2	0	0	0	0	0	0	0	0	0	0	0	0	0	0	0	0	1
C16H1orf174	0	0	0	0	0	1	1	0	2	0	3	3	0	0	2	0	2	0	1	1	0	0	1	0	1	1	0	0	0	2	0	0	0	0	0	0	0	1	0	0	4	0	0	0	0	0	2	1	0
C16H1orf21	10	22	8	14	32	9	14	5	27	18	10	3	15	18	20	20	12	16	15	24	16	20	21	15	13	16	13	17	22	14	12	22	24	22	28	21	8	15	21	22	26	28	9	5	6	44	36	5	15
C16H1orf53	2	1	6	2	10	5	4	8	7	11	16	19	10	6	9	8	3	5	7	6	4	4	5	9	13	11	18	21	17	15	3	5	14	8	0	3	6	8	2	15	3	12	1	4	6	17	0	1	0
C16H1orf74	0	4	0	3	1	1	4	1	1	2	8	12	3	13	8	6	16	5	8	6	14	11	15	8	5	4	17	7	3	3	11	27	16	14	16	14	8	25	36	45	45	36	16	24	13	29	29	11	11
C17H12orf43	4	21	1	8	12	5	7	9	21	14	14	13	22	15	20	12	15	25	29	15	21	25	15	11	9	18	12	1	13	14	10	16	16	18	5	6	6	13	28	35	23	24	27	14	15	21	28	10	13
C17H12orf49	6	71	52	61	29	49	55	47	77	78	93	117	82	76	176	138	112	133	138	122	73	131	91	80	116	139	118	133	84	87	36	79	123	74	45	101	143	149	83	181	155	213	92	117	84	168	59	31	20
C17H12orf65	20	63	23	36	39	56	33	45	40	48	57	52	35	41	60	43	39	67	58	60	40	43	42	51	49	39	51	24	40	60	17	23	28	23	28	17	25	23	35	35	47	48	48	33	14	23	35	22	17
C17H22orf15	0	0	0	0	0	0	0	0	0	0	0	0	0	0	0	0	0	0	0	0	0	0	0	0	0	0	0	0	0	0	0	0	0	0	0	0	0	0	0	0	0	0	0	0	0	0	0	0	0
C17H22orf31	0	0	0	0	0	0	0	0	0	0	0	0	1	0	0	0	0	0	0	0	0	0	0	0	0	0	0	0	0	0	0	0	0	0	1	0	2	0	0	0	0	0	1	0	0	0	0	0	0
C17H22orf39	0	0	8	2	4	0	9	9	5	3	9	15	15	11	20	17	13	15	21	20	9	8	16	7	19	6	29	17	12	13	6	8	10	7	1	9	3	8	2	11	13	11	2	8	6	15	0	0	0
C17H4orf33	706	371	343	514	523	411	536	477	531	426	323	377	403	363	290	399	227	351	366	361	249	295	285	293	572	557	423	348	677	588	123	159	243	148	106	125	152	188	283	294	307	327	566	384	251	364	444	251	200
C17H4orf45	0	0	0	0	0	0	0	0	0	0	0	0	0	0	0	0	0	0	0	0	0	0	0	0	0	0	0	0	0	0	0	0	0	0	0	0	0	0	0	0	0	0	0	0	0	0	0	0	0
C17H4orf46	0	0	0	2	0	1	0	0	1	0	0	0	0	0	0	1	2	1	0	3	1	0	0	0	0	0	0	0	0	0	0	0	0	0	0	2	2	1	0	0	0	0	0	0	0	0	0	0	0
C17H4orf51	0	0	0	0	0	0	0	0	1	0	0	0	0	0	0	0	0	0	0	0	0	0	0	0	0	0	0	1	1	0	0	1	0	0	0	0	0	0	0	1	0	0	0	0	0	0	0	0	0
C17H5orf52	0	0	0	0	0	1	0	3	0	1	4	3	1	3	1	2	4	0	0	3	2	3	3	1	4	3	0	4	1	0	0	0	0	1	0	1	2	0	1	1	2	1	1	1	0	2	1	2	0
C18H16orf46	3	30	17	15	21	7	9	11	22	25	63	75	58	62	76	72	54	62	70	69	60	54	97	48	51	50	25	29	38	59	48	91	96	77	98	92	103	88	98	125	119	120	37	60	60	82	74	60	42
C18H16orf70	7	49	40	17	21	11	67	24	49	45	72	104	132	114	169	157	113	144	138	146	121	111	170	83	182	111	97	111	91	74	146	235	247	192	169	207	258	272	402	366	389	388	159	228	145	269	219	116	102
C18H16orf74	18	25	57	15	17	34	115	81	117	88	111	146	99	110	245	226	111	115	174	212	89	129	178	124	214	164	241	237	182	199	28	86	166	134	10	27	59	133	32	89	134	231	30	69	62	198	33	16	34
C18H16orf78	0	0	0	0	0	0	0	0	0	0	0	0	0	0	0	0	0	0	0	0	0	0	0	0	0	0	0	0	0	0	0	0	0	0	0	0	0	0	0	0	0	0	0	0	0	0	0	0	0
C18H16orf86	0	0	0	0	0	0	0	0	0	0	0	0	0	0	0	0	0	0	0	0	0	0	0	1	0	0	0	0	0	0	0	0	0	0	0	0	0	0	0	0	0	0	0	0	0	0	0	0	0
C18H16orf87	10	20	35	31	30	28	43	43	42	36	34	39	33	21	47	31	34	29	48	33	36	32	30	23	37	44	63	44	56	43	6	17	12	12	4	6	13	15	12	13	24	14	26	13	12	18	6	8	8
C18H16orf95	1	0	0	0	0	0	0	0	1	1	0	0	1	0	0	1	0	0	0	0	0	0	1	0	1	1	0	0	0	1	0	0	0	0	0	0	0	0	0	0	0	1	1	1	0	0	3	0	0
C18H19orf12	1	2	0	0	1	2	2	1	5	4	11	14	5	11	12	7	9	4	9	5	7	9	7	9	11	13	10	16	10	13	11	35	38	16	14	20	18	21	17	25	22	53	14	25	28	29	10	7	19
C18H19orf18	1	1	0	5	1	0	2	0	0	0	0	0	0	0	0	0	0	0	0	0	0	0	0	1	0	0	0	0	0	0	1	0	0	0	1	1	0	0	0	1	0	3	0	0	2	0	0	0	0
C18H19orf33	0	0	0	0	0	0	0	0	0	0	0	0	0	0	0	0	0	0	0	0	0	0	0	0	0	0	0	0	0	0	0	0	0	0	0	0	0	0	0	0	0	0	0	0	0	0	0	0	0
C18H19orf47	0	2	3	5	3	1	0	10	12	1	12	9	11	9	14	7	15	17	20	17	6	7	12	12	9	8	14	18	0	16	10	20	8	11	7	9	18	16	23	21	36	34	19	12	16	12	7	2	4
C18H19orf48	1	2	0	1	2	1	2	0	2	1	5	5	17	10	11	15	3	8	6	11	0	7	3	3	9	11	13	8	4	6	7	16	12	6	7	16	16	15	12	11	18	13	8	16	19	13	1	0	5
C18H19orf54	8	4	14	6	11	7	17	4	11	7	44	35	17	23	43	46	20	21	31	35	19	29	30	30	17	26	34	20	37	29	7	19	22	13	11	21	8	20	35	45	51	45	54	41	20	21	28	24	17
C18H19orf73	0	0	0	0	0	0	0	0	0	0	0	0	0	0	0	0	0	0	0	0	0	0	0	0	0	0	0	0	0	0	0	0	0	0	0	0	0	0	0	0	0	0	0	0	0	0	0	0	0
C18H19orf81	0	0	0	0	0	2	1	0	0	0	0	0	1	0	0	0	0	0	1	0	3	0	0	0	0	1	0	0	0	0	0	0	0	0	0	0	0	0	0	2	0	0	0	0	0	1	0	0	0
C18H19orf84	0	3	2	0	2	4	2	3	0	2	5	3	9	11	13	7	4	2	2	3	4	5	4	2	9	2	3	4	8	9	1	1	5	3	4	1	1	6	12	1	4	8	2	2	2	9	2	6	4
C19H17orf100	0	0	0	0	0	0	0	0	0	0	0	0	0	0	0	0	0	0	0	0	0	0	0	0	0	0	0	0	0	0	0	0	0	0	0	0	0	0	0	0	0	0	0	0	0	0	0	0	0
C19H17orf107	0	0	0	0	0	0	0	0	0	0	0	3	0	0	0	0	0	1	0	0	0	0	1	1	0	0	0	0	0	0	1	0	0	0	0	0	0	0	0	2	1	0	0	0	0	0	0	0	0
C19H17orf113	6	31	7	12	6	16	32	17	30	22	22	30	99	71	80	66	37	46	68	54	43	42	38	22	71	41	73	83	61	67	65	129	132	83	39	69	58	61	192	185	131	147	78	116	104	98	65	40	25
C19H17orf47	0	0	0	0	0	0	0	0	0	0	0	0	0	0	0	0	0	0	0	0	0	0	0	0	0	0	0	0	0	0	0	0	0	0	0	0	0	0	0	0	0	0	0	0	0	0	0	0	0
C19H17orf49	443	409	418	562	464	468	707	616	748	564	656	842	661	538	570	644	467	488	745	664	394	490	375	420	689	608	751	631	979	1036	170	278	422	291	205	216	211	336	388	489	539	466	673	466	341	517	596	338	286
C19H17orf50	0	0	0	0	0	0	0	0	0	0	0	0	0	0	0	0	0	0	0	0	0	0	0	1	0	1	0	0	0	0	0	0	0	0	0	0	0	0	0	0	0	0	0	0	0	0	0	0	0
C19H17orf53	4	46	28	3	1	9	45	7	45	13	70	108	65	62	105	72	52	56	65	79	72	84	84	66	66	62	85	74	75	82	27	44	59	40	41	31	24	45	82	77	69	69	67	88	47	56	66	32	27
C19H17orf58	11	20	15	11	10	13	10	17	11	19	27	16	35	16	44	25	31	29	38	32	21	14	18	14	33	47	31	34	30	31	27	32	45	9	16	19	25	51	46	19	41	49	45	22	12	22	41	11	10
C19H17orf64	0	0	0	0	0	0	0	0	0	0	0	0	0	0	0	0	0	0	0	0	0	0	0	0	0	0	0	0	0	0	0	0	0	0	0	0	0	0	0	0	0	0	0	0	0	0	0	0	0
C19H17orf67	0	1	0	0	0	0	0	0	0	1	0	1	1	0	0	0	1	0	0	0	0	0	0	0	0	0	0	4	0	0	0	0	0	0	0	0	0	1	0	0	1	1	0	2	0	0	0	0	0
C19H17orf75	29	37	13	25	21	24	27	24	37	42	27	45	48	50	34	37	18	34	44	44	64	50	43	36	52	49	114	74	59	64	15	25	35	18	26	33	32	36	41	45	83	42	33	37	29	69	103	49	51
C19H17orf78	3	0	0	4	8	4	5	2	4	12	2	5	11	6	3	4	1	1	5	5	2	5	4	1	9	2	1	1	2	5	1	2	6	0	4	0	0	0	11	5	2	5	3	0	0	3	0	2	1
C19H17orf80	7	5	2	6	4	5	14	4	2	7	20	16	24	10	13	9	28	28	20	14	17	18	10	13	7	15	13	16	15	24	11	13	16	9	5	1	7	12	25	24	41	26	14	12	4	2	17	3	1
C19H17orf97	0	1	2	0	3	0	7	6	8	1	5	4	10	0	4	3	2	2	2	10	2	2	2	1	9	10	2	11	6	4	0	4	12	1	0	1	0	2	8	7	6	5	0	8	2	9	1	1	8
C19H17orf98	0	0	0	0	0	0	1	0	0	0	0	0	0	0	0	0	0	0	0	0	0	0	0	0	0	0	0	1	1	0	0	0	0	0	0	0	0	0	0	0	0	0	0	0	0	0	0	0	0
C1D	108	354	172	128	271	216	308	444	215	315	135	148	274	230	239	274	286	352	339	287	173	255	239	237	310	181	265	195	408	383	112	188	220	188	104	87	66	124	228	292	234	269	116	94	57	74	232	158	137
C1GALT1	0	10	2	18	4	5	6	5	13	13	3	14	6	1	16	19	6	15	10	17	9	8	10	5	21	7	14	12	30	10	4	10	22	10	6	8	18	23	7	50	28	21	11	11	18	22	1	0	3
C1GALT1C1	123	67	34	95	37	43	71	56	68	48	43	57	46	64	57	36	49	55	50	51	7	12	31	36	82	57	89	68	83	69	15	46	65	32	29	25	37	39	86	51	46	51	64	39	37	52	82	46	32
C1H21orf140	1	0	0	0	1	1	0	0	0	2	0	0	0	0	0	0	1	0	0	3	0	0	0	0	0	1	0	2	0	0	0	0	0	0	0	0	0	0	0	0	0	0	0	0	0	0	1	0	0
C1H21orf2	0	0	1	0	0	2	3	1	0	0	1	0	1	1	2	3	1	1	0	1	2	1	0	1	1	2	1	2	2	1	0	1	2	1	0	2	0	3	0	0	5	0	0	1	0	0	2	0	0
C1H21orf58	0	1	0	0	0	0	0	0	0	0	0	0	0	1	0	1	0	1	0	0	1	1	0	0	0	0	3	0	0	0	0	0	0	0	0	0	0	0	1	0	1	0	0	0	0	0	0	0	0
C1H21orf62	0	0	0	0	0	0	0	0	0	0	0	0	0	0	0	0	0	0	0	0	0	0	0	2	0	0	0	0	0	0	0	0	0	0	0	0	0	0	0	0	0	0	0	0	0	0	0	0	0
C1H21orf91	247	286	95	257	161	208	221	200	231	243	269	280	315	233	212	203	317	357	319	230	179	222	221	234	319	264	325	276	285	221	237	284	368	328	176	222	234	270	388	432	421	470	213	208	137	226	462	213	194
C1H3orf30	0	0	0	1	0	0	0	0	0	0	0	0	0	0	0	0	0	0	0	0	0	0	0	0	0	0	0	0	0	0	0	0	0	0	0	0	0	0	0	0	0	0	0	0	0	0	0	0	0
C1H3orf33	3	22	8	21	10	9	29	19	24	14	14	11	26	16	21	19	28	13	25	4	13	6	8	7	18	13	21	24	26	16	3	3	5	14	2	2	5	12	3	2	6	4	14	9	5	10	13	27	4
C1H3orf38	301	517	401	519	400	397	712	429	813	748	628	698	947	743	670	695	724	789	930	746	648	719	759	629	1060	907	1035	796	1004	1058	512	703	816	696	671	721	670	853	1041	1266	1216	1119	1125	700	553	1020	1304	732	664
C1H3orf52	1	0	2	1	2	0	1	1	0	4	2	0	1	2	4	8	2	4	3	4	8	3	14	2	3	0	6	13	15	9	1	0	10	4	2	4	1	0	12	7	6	0	13	11	5	7	5	3	5
C1H3orf58	0	0	0	1	2	0	0	0	0	0	0	0	1	0	1	0	1	0	0	2	0	0	0	0	0	3	3	0	0	0	1	0	5	0	0	1	1	0	0	0	0	0	0	0	0	0	0	0	0
C1H3orf70	0	1	4	8	5	3	7	6	5	3	5	12	8	5	12	12	10	6	7	12	4	5	10	5	10	8	4	7	8	9	9	16	8	6	15	5	14	27	6	14	15	21	20	17	13	15	7	0	3
C1H3orf80	0	0	0	0	0	0	0	0	0	0	0	0	0	0	0	0	0	0	0	0	0	0	0	0	0	0	0	0	0	0	0	0	0	0	0	0	0	0	0	0	0	0	0	0	0	0	0	0	0
C1H3orf85	0	0	0	0	0	0	0	0	0	0	0	0	0	0	0	0	0	0	0	0	0	0	0	0	0	0	0	0	0	0	0	0	0	0	0	0	0	0	0	0	0	0	0	0	0	0	0	0	0
C1QA	0	0	0	0	0	0	1	0	0	0	0	2	0	0	0	0	1	0	0	1	0	2	1	0	0	1	0	0	0	0	0	0	0	0	0	0	0	0	0	2	0	2	0	0	0	0	0	0	0
C1QB	0	0	0	0	0	0	0	0	0	0	0	0	0	0	0	0	0	0	0	0	0	0	0	0	0	0	0	0	0	0	0	0	0	0	0	0	0	0	0	0	0	0	0	0	0	0	0	0	0
C1QBP	50	41	109	66	200	221	291	220	305	207	370	524	420	337	403	380	369	365	507	429	327	384	455	308	457	375	486	454	419	484	222	346	427	320	11	253	202	306	35	516	612	538	22	313	178	392	20	5	8
C1QC	0	0	0	0	0	0	0	0	0	0	0	0	0	0	0	0	0	0	0	0	0	0	0	0	0	0	0	0	0	0	0	0	0	0	0	0	0	0	0	0	0	0	0	0	0	0	0	0	0
C1QL1	0	0	0	0	0	1	0	0	0	0	0	0	0	1	0	0	0	0	0	0	0	0	0	0	0	1	0	0	0	1	0	0	1	1	0	0	0	2	0	0	0	0	0	1	0	1	0	0	0
C1QL2	0	0	0	0	0	0	0	0	0	0	0	0	0	0	0	0	0	0	0	0	0	0	0	0	0	0	0	0	0	0	0	0	0	0	0	0	0	0	0	0	0	0	0	0	0	0	0	0	0
C1QL3	0	3	1	0	1	0	0	2	3	7	3	6	2	4	1	3	2	2	3	0	0	3	3	5	0	2	4	1	1	3	2	7	5	0	5	4	8	3	4	1	3	4	3	5	3	3	4	0	3
C1QL4	0	1	0	0	0	0	1	0	0	0	0	0	0	0	0	1	0	0	0	2	0	2	0	0	0	0	1	0	1	0	3	0	0	0	0	2	0	0	0	1	1	2	4	2	0	2	0	0	0
C1QTNF1	0	0	0	0	0	0	0	0	0	0	0	0	0	0	0	0	0	0	0	0	0	0	0	0	0	0	0	0	0	0	0	0	0	0	0	0	0	0	0	0	0	0	0	0	0	0	0	0	0
C1QTNF12	0	0	0	0	0	0	0	0	0	0	0	0	0	0	0	0	0	0	0	0	0	0	0	0	0	0	0	0	0	0	0	0	0	0	0	0	0	0	0	0	0	0	0	0	0	0	0	0	0
C1QTNF2	0	0	0	0	0	0	0	0	0	0	0	0	0	0	0	0	0	0	0	0	0	0	0	0	0	0	0	0	0	0	0	0	0	0	0	0	0	0	0	0	0	0	0	0	0	0	0	0	0
C1QTNF3	0	0	0	0	0	0	0	0	0	0	0	0	0	0	0	0	0	0	0	0	0	0	0	0	0	0	0	0	0	0	0	0	1	0	0	0	0	0	0	0	0	0	0	0	0	0	0	0	0
C1QTNF4	0	0	0	0	0	0	0	0	0	0	0	0	0	0	0	1	0	0	0	0	0	0	0	0	0	0	0	0	0	0	0	0	0	0	0	0	0	0	0	0	0	0	0	0	0	0	0	0	0
C1QTNF5	0	0	0	0	0	0	0	0	0	0	0	0	0	0	0	0	0	0	0	0	0	0	0	0	0	0	0	0	0	0	0	0	0	0	0	0	0	0	0	0	0	0	0	0	0	0	0	0	0
C1QTNF6	0	0	0	0	0	0	0	0	0	0	0	0	0	0	0	0	0	0	0	0	0	0	0	0	0	0	0	0	0	0	0	0	0	0	0	0	0	0	0	0	0	0	0	0	0	0	0	0	0
C1QTNF7	0	0	0	0	0	0	0	0	0	0	0	0	0	0	0	0	0	0	0	0	0	0	0	0	0	0	0	0	0	0	0	0	0	0	0	0	0	0	0	0	0	0	0	0	0	0	0	0	0
C1QTNF8	0	0	0	0	0	0	0	0	0	0	0	0	0	0	0	0	0	0	0	0	0	0	0	0	0	0	0	0	0	0	0	0	0	0	0	0	0	0	0	0	0	0	0	0	0	0	0	0	0
C1QTNF9	0	0	0	0	0	0	0	0	0	0	0	0	0	0	0	0	0	0	0	0	1	0	0	0	0	0	0	0	0	0	0	0	0	0	0	0	0	0	0	0	0	0	0	0	0	0	0	0	0
C1R	0	0	0	0	0	0	0	0	0	0	0	0	0	0	0	0	0	0	0	0	0	0	0	0	0	0	0	0	0	0	0	0	0	0	0	0	0	0	0	0	0	0	0	0	0	0	0	0	0
C1RL	0	0	0	0	0	0	0	0	0	0	0	0	0	0	0	0	0	0	0	0	0	0	0	0	0	0	0	0	0	0	0	0	0	0	0	0	0	0	0	0	0	0	0	0	0	0	0	0	0
C1S	0	0	0	0	0	0	0	0	0	0	0	0	0	0	0	0	0	0	0	0	0	0	0	0	0	0	0	0	0	0	0	0	0	0	0	0	0	0	0	0	0	0	0	0	0	0	0	0	0
C2	0	0	0	0	0	0	0	0	0	0	0	0	0	0	0	0	0	0	0	0	0	0	0	0	0	0	0	0	0	0	0	0	0	0	0	0	0	0	0	0	0	0	0	0	0	0	0	0	0
C20H5orf22	66	119	80	51	34	41	130	54	135	148	186	206	286	188	119	135	196	185	147	228	145	181	212	116	257	276	289	271	237	205	172	247	290	217	192	173	141	234	393	368	442	442	351	296	254	396	431	194	167
C20H5orf34	251	393	187	257	173	176	416	195	436	388	386	470	528	469	433	475	458	524	529	460	314	350	464	298	711	675	583	501	663	465	181	289	332	245	278	251	225	369	414	457	430	366	547	422	279	427	595	297	266
C20H5orf47	128	24	7	41	25	27	30	26	37	32	36	18	31	27	44	31	32	42	48	42	21	25	32	28	28	32	37	27	44	36	9	31	18	20	13	16	22	27	28	29	42	25	45	27	19	40	30	22	16
C20H5orf49	0	0	0	0	0	0	0	0	0	0	0	0	0	0	1	0	0	1	0	0	0	0	0	1	0	0	0	0	0	0	0	0	0	0	0	0	0	0	0	0	1	0	0	0	0	0	0	0	0
C20H5orf51	106	170	113	182	118	194	154	113	234	199	195	221	304	236	216	210	339	348	277	263	186	221	195	190	302	295	308	241	250	204	289	476	471	383	386	328	340	411	499	644	602	530	363	291	258	293	463	219	222
C20H5orf58	32	149	58	172	254	182	92	157	160	215	47	38	88	40	70	83	14	24	25	22	17	23	24	28	68	115	71	68	107	78	14	44	60	28	34	22	42	41	77	91	92	86	51	39	9	56	23	14	12
C21H14orf132	0	0	0	0	0	0	0	0	0	0	0	0	1	0	0	0	0	0	0	0	0	0	0	0	0	0	0	0	0	0	0	0	0	0	0	0	0	0	0	0	0	0	0	0	0	0	0	0	0
C21H14orf180	0	0	0	0	0	0	0	0	0	0	0	0	0	0	0	0	0	0	0	0	0	0	0	0	0	0	0	0	0	0	0	0	0	0	0	0	0	0	0	0	0	0	0	0	0	0	0	0	0
C21H14orf28	0	1	0	0	0	0	0	1	0	0	0	0	1	0	0	1	3	1	2	4	0	0	3	2	1	1	1	1	3	1	3	2	0	3	1	1	2	2	0	7	2	3	1	0	0	0	0	0	0
C21H15orf39	0	3	4	3	0	0	4	6	3	6	11	15	11	17	23	20	2	7	6	13	21	11	16	3	25	17	18	22	12	12	20	26	17	21	7	22	22	31	14	29	37	37	16	19	15	30	4	5	10
C21H15orf40	0	3	2	3	2	2	1	0	1	1	2	9	1	4	1	0	3	1	5	4	4	3	5	0	3	6	2	2	5	3	1	0	1	0	2	3	2	2	0	0	3	0	2	0	2	4	0	1	4
C22H3orf14	8	35	25	12	14	29	31	18	23	30	24	31	27	24	22	25	29	33	26	14	22	14	31	32	24	30	41	36	25	38	18	35	50	52	28	55	34	48	87	58	87	94	57	42	21	63	69	39	23
C22H3orf18	0	0	0	0	0	0	0	0	0	0	0	0	0	0	0	0	0	0	0	0	0	0	0	0	0	0	0	0	0	0	0	0	0	0	0	0	1	0	0	0	0	0	0	0	0	0	0	0	0
C22H3orf20	0	0	1	0	0	0	0	0	0	0	1	0	2	0	0	1	0	0	0	0	0	1	0	0	0	0	1	0	0	0	0	0	0	0	0	0	1	2	1	0	0	0	0	0	0	0	0	0	0
C22H3orf22	0	0	0	0	0	0	0	0	0	0	0	0	0	0	0	0	0	0	0	0	0	0	0	0	0	0	0	0	0	0	0	0	0	0	0	0	0	0	0	0	0	0	0	0	0	0	0	0	0
C22H3orf35	4.96	5.51	5.93	11	2.66	8.62	15.73	15	9.81	2.79	4	6	2.8	2	5.8	3	4.63	5.65	1	0	3	3	4.96	4	10.72	1	12.79	0	11	9.89	0	0	1.21	0	0	0	1	3.83	0.39	0.43	1	1	1.79	2.41	0	1	3	3	1
C22H3orf49	10	1	2	9	11	5	4	7	7	3	0	2	4	2	1	4	2	6	5	1	3	2	0	2	3	3	3	4	0	3	4	4	4	0	3	1	7	0	3	0	1	1	3	1	0	1	8	5	2
C22H3orf62	0	2	0	1	4	0	8	1	0	6	3	8	1	1	2	3	2	2	0	0	1	3	3	2	4	1	0	3	0	1	1	2	9	1	1	0	1	0	6	3	10	6	0	1	0	3	4	5	0
C22H3orf67	7	17	13	18	13	12	20	19	17	12	20	28	40	27	37	26	29	30	23	23	47	21	42	20	36	32	52	23	24	44	32	64	21	46	36	33	46	29	76	90	76	55	41	91	58	51	56	31	34
C22H3orf84	0	0	0	0	0	0	0	0	0	0	0	0	0	0	0	0	0	0	0	0	0	0	0	1	0	1	1	0	0	0	0	0	0	0	0	0	0	0	0	0	2	0	0	0	0	0	0	0	0
C23H6orf10	0	0	0	0	0	0	0	0	0	0	0	0	0	0	0	0	0	0	0	0	0	0	0	0	0	0	0	0	0	0	0	0	0	0	0	0	0	0	0	0	0	0	0	0	0	0	0	0	0
C23H6orf106	16	62	52	36	19	31	61	32	50	44	93	79	65	44	204	93	69	102	76	96	56	77	77	65	68	72	80	87	85	80	48	57	67	45	43	61	78	98	123	67	75	95	95	86	38	88	63	24	45
C23H6orf132	0	0	0	0	0	0	0	0	0	0	0	0	0	0	0	0	0	0	0	0	0	0	0	0	0	0	0	0	0	0	0	0	0	0	0	0	0	0	0	0	0	0	0	0	0	0	0	2	0
C23H6orf136	16	7	12	8	2	5	11	3	12	12	14	29	19	16	35	35	11	17	15	31	19	15	19	13	18	19	33	27	35	27	13	10	21	13	6	10	15	12	39	44	36	58	35	14	22	28	19	21	12
C23H6orf141	5	15	2	6	3	1	2	1	3	2	7	3	1	2	1	3	6	2	6	3	9	1	1	1	4	2	11	15	2	5	8	7	3	7	0	1	0	5	1	0	0	0	9	8	1	10	6	10	13
C23H6orf15	0	3	1	1	1	3	6	1	1	1	2	0	1	1	0	1	1	3	3	2	3	0	0	0	1	2	2	4	2	3	0	0	1	4	0	1	0	0	0	4	1	0	0	6	2	2	2	1	0
C23H6orf201	0	0	0	0	0	0	1	1	0	1	0	0	0	1	1	0	2	2	5	1	0	2	0	0	1	0	1	1	3	2	0	0	1	1	0	0	0	1	3	0	2	2	2	0	0	1	0	2	0
C23H6orf222	0	7	0	4	1	3	6	1	1	1	2	0	2	0	3	5	4	0	5	4	1	1	2	3	0	1	3	2	6	8	0	1	4	1	5	2	0	3	3	5	8	2	4	0	5	3	7	1	0
C23H6orf223	0	0	0	0	0	0	0	0	0	0	0	0	0	0	1	0	0	0	0	0	1	0	0	0	0	0	0	0	0	1	0	0	0	0	1	0	0	0	2	0	0	1	0	0	1	0	0	0	0
C23H6orf226	26	70	39	72	57	86	91	54	79	97	111	140	136	102	147	107	130	154	220	196	120	129	100	118	121	117	187	128	87	114	38	70	92	67	83	67	81	107	113	118	138	127	112	69	56	89	161	100	78
C23H6orf47	0	0	0	0	0	0	0	0	0	0	0	0	0	0	0	0	0	0	0	0	0	0	0	0	0	0	0	0	0	0	0	0	0	0	0	0	0	0	0	0	0	0	0	0	0	0	0	0	0
C23H6orf52	32	63	50	132	69	127	51	53	52	61	30	34	82	67	60	63	74	74	77	84	51	39	36	47	88	74	72	78	32	33	34	54	80	55	40	41	30	72	97	136	151	100	74	53	48	51	104	44	42
C23H6orf62	3	23	6	7	20	3	9	6	10	10	8	7	3	8	30	14	18	6	16	12	8	6	15	2	12	6	26	10	8	13	2	9	6	5	1	7	10	9	8	9	2	10	8	4	2	2	9	5	1
C23H6orf89	17	99	44	37	33	33	96	38	82	65	155	136	115	116	165	126	110	145	152	122	137	124	113	127	151	161	151	80	119	121	54	98	102	104	106	101	87	108	261	230	230	171	148	124	141	144	150	101	63
C24H18orf21	20	29	24	65	28	43	27	23	35	48	21	29	40	33	29	24	32	30	38	26	14	22	19	34	36	32	33	32	22	31	10	23	27	13	13	10	12	17	29	35	24	30	13	14	10	8	25	6	7
C24H18orf25	16	47	62	51	22	45	109	53	120	94	145	140	132	151	166	149	193	187	162	124	154	176	185	89	161	155	166	119	130	118	155	281	292	233	130	165	184	217	321	421	353	356	200	199	164	225	103	43	50
C24H18orf32	2170	710	561	1083	1294	825	930	1091	1119	1090	591	710	1084	823	918	908	984	1213	1270	1065	713	831	866	765	1010	997	1210	1070	1192	1064	413	738	848	667	573	563	532	907	1033	993	1048	1095	1047	724	466	913	907	640	580
C24H18orf54	25	50	25	48	24	46	33	43	47	64	30	50	54	65	45	55	62	70	63	59	42	53	47	42	60	62	56	62	64	49	24	19	82	32	38	41	56	58	65	123	67	61	112	65	40	73	53	17	29
C24H18orf63	1	7	4	1	2	3	2	2	4	6	3	7	5	6	3	10	5	4	2	1	4	6	5	3	4	0	2	10	6	10	7	4	5	3	3	10	14	9	14	8	24	7	7	4	9	5	10	4	1
C25H16orf45	0	0	0	0	0	0	0	0	0	0	0	0	0	0	0	0	0	0	0	0	0	0	0	0	0	0	0	0	0	1	0	0	0	0	0	1	0	0	0	0	0	0	0	0	0	0	0	0	0
C25H16orf54	0	0	0	0	0	0	0	0	0	0	0	0	0	0	0	0	0	0	0	0	0	0	0	0	0	0	0	0	0	0	0	0	0	0	0	0	0	0	0	0	0	0	0	0	0	0	0	0	0
C25H16orf58	0	0	0	0	0	0	0	0	0	0	0	0	1	0	0	1	0	0	0	0	0	0	0	0	0	0	0	0	0	0	1	0	0	0	0	0	0	1	0	4	0	2	2	0	0	1	0	0	0
C25H16orf71	0	0	0	1	0	0	0	0	0	0	4	0	1	0	2	3	0	1	0	0	0	0	0	2	1	3	3	0	1	0	1	2	1	0	0	1	5	4	5	1	4	1	3	2	1	2	6	1	1
C25H16orf72	9	19	29	36	19	39	20	15	24	33	21	17	24	14	25	17	33	26	26	17	18	22	16	21	19	17	29	14	39	11	12	6	12	17	43	14	21	20	17	29	31	35	25	46	9	24	30	24	10
C25H16orf82	0	1	0	0	0	0	0	0	0	0	0	0	0	0	0	0	0	0	0	0	0	0	0	0	0	0	0	1	0	0	0	1	0	0	0	0	0	0	0	0	0	0	0	0	0	0	0	0	0
C25H16orf89	0	0	0	1	0	0	1	0	0	4	1	0	0	0	2	0	0	2	0	0	0	2	0	0	0	0	2	0	1	1	0	0	1	0	0	0	0	2	0	0	0	0	0	0	0	0	0	2	0
C25H16orf90	0	0	0	0	0	0	0	0	0	0	0	0	0	0	0	0	0	0	0	0	0	0	0	0	0	0	0	0	0	0	0	0	0	0	0	0	0	0	0	0	0	0	0	0	0	0	0	0	0
C25H16orf91	14	10	16	25	15	16	31	28	34	24	67	77	65	49	44	53	31	51	59	46	52	50	64	50	112	74	63	72	75	66	27	44	40	44	10	28	38	63	11	34	48	69	33	46	40	81	10	10	8
C25H16orf92	0	0	0	0	0	0	0	0	0	0	0	0	0	0	0	0	0	0	0	0	0	0	0	0	0	0	0	0	0	0	0	0	0	0	0	0	0	0	0	0	0	0	0	0	0	0	0	0	0
C25H16orf96	0	3	0	2	2	0	1	2	0	0	1	0	2	2	2	1	4	2	1	1	2	0	1	0	0	1	2	4	1	8	1	1	2	0	1	3	5	0	0	6	3	2	2	0	1	0	3	6	0
C25H7orf26	5	19	15	4	4	7	14	17	16	13	27	20	23	11	18	33	23	23	24	19	31	24	18	21	19	20	26	22	28	31	8	8	13	13	13	11	20	29	13	14	17	20	27	20	16	23	20	10	5
C25H7orf43	0	2	9	2	1	1	7	3	13	7	8	10	7	10	20	23	9	6	26	25	1	10	11	12	40	26	31	34	28	49	8	18	20	14	6	3	5	13	2	10	5	15	13	2	4	25	7	3	3
C25H7orf50	0	9	2	1	2	3	14	3	4	7	7	10	5	8	10	12	6	6	18	9	10	5	17	8	11	6	7	6	2	3	5	5	12	9	7	5	7	8	12	16	15	19	16	4	5	7	0	6	6
C25H7orf61	0	0	0	0	0	0	0	0	0	0	0	0	1	1	0	0	0	1	0	0	0	0	0	0	1	0	0	0	0	0	0	0	0	0	0	0	0	0	1	0	0	2	0	0	0	0	0	0	0
C26H10orf120	0	0	0	0	0	0	0	0	0	0	0	0	0	0	0	0	0	0	0	0	0	0	0	0	0	0	0	0	0	0	0	0	0	0	0	0	0	0	0	0	0	0	0	0	0	0	0	0	0
C26H10orf143	16	34	26	17	15	13	59	26	43	31	62	78	74	54	114	57	39	48	48	56	51	71	56	37	73	80	57	61	76	115	30	36	43	31	25	40	35	42	51	64	50	53	75	90	44	87	8	13	32
C26H10orf62	0	2	0	1	1	1	3	1	1	3	0	3	0	3	10	7	4	3	6	4	1	3	0	2	3	3	0	3	2	3	0	4	6	5	3	2	2	3	5	10	10	13	5	4	3	0	3	7	2
C26H10orf82	0	0	0	0	0	0	0	0	0	0	0	0	0	0	0	0	0	0	0	0	0	0	0	0	0	0	0	0	0	0	0	0	0	0	0	0	0	0	0	0	0	0	0	0	0	0	0	0	1
C26H10orf88	10	21	8	25	8	19	20	11	26	10	4	13	22	21	19	34	29	24	32	27	16	15	17	16	33	31	27	18	34	38	32	41	73	29	20	22	17	17	64	71	75	77	20	19	17	44	21	16	20
C26H10orf90	18	29	32	25	22	15	52	18	50	36	85	102	79	110	88	73	79	82	92	94	70	70	88	29	84	97	99	80	51	57	100	179	184	142	137	147	136	136	261	281	278	279	120	125	106	161	152	107	109
C26H6orf52	0	0	0	0	0	0	0	0	2	0	0	0	0	0	0	0	0	0	0	0	0	0	0	0	3	0	0	0	0	0	0	0	0	0	0	0	0	0	0	0	0	0	0	0	0	0	0	0	0
C27H4orf47	2	4	4	6	7	1	5	3	4	7	1	2	4	5	10	6	6	3	11	4	3	5	2	3	8	4	2	0	7	2	0	8	1	1	11	0	1	13	7	9	8	7	9	1	9	2	6	0	0
C27H8orf48	0	1	3	0	0	1	1	3	1	1	0	0	0	0	5	1	0	3	5	5	0	0	0	0	2	2	1	1	3	0	2	3	0	4	0	0	1	0	2	0	1	7	4	1	0	0	3	0	0
C28H10orf105	0	0	0	0	0	0	0	0	0	0	0	0	0	0	0	0	0	0	0	0	0	0	0	0	0	0	1	0	0	0	0	0	0	0	0	0	0	0	0	0	0	0	0	0	0	0	0	0	0
C28H10orf53	0	0	0	0	0	0	0	0	0	0	0	0	0	0	0	0	0	0	0	0	0	0	0	0	0	0	0	0	0	0	0	0	0	0	0	0	0	0	0	0	0	0	0	0	0	0	0	0	0
C28H10orf71	0	0	0	0	0	0	0	0	0	0	0	0	0	0	0	0	0	0	0	0	0	0	0	0	0	0	0	0	0	0	0	0	0	0	0	0	0	0	0	0	0	0	0	0	0	0	0	0	0
C28H10orf99	0	0	0	0	0	0	0	0	0	0	0	0	0	0	0	0	0	0	0	0	1	0	0	0	0	1	0	0	0	0	0	0	0	0	0	0	0	0	0	0	0	0	0	0	0	0	0	0	1
C28H1orf131	61	120	89	122	91	125	133	137	157	163	188	261	254	187	240	182	264	273	246	221	216	209	175	148	245	199	228	188	211	197	108	179	233	176	106	119	113	156	221	223	251	254	186	143	105	191	221	113	107
C28H1orf198	0	0	0	1	0	0	1	0	4	3	4	7	5	10	8	9	6	5	5	8	0	2	8	1	3	11	4	7	5	9	3	2	5	7	2	3	11	1	7	7	11	10	12	6	0	9	2	0	1
C29H11orf24	0	1	3	2	1	1	8	4	5	3	18	22	15	17	36	48	18	16	25	19	15	22	28	13	14	17	11	18	12	16	20	28	34	27	1	8	20	26	7	62	74	64	2	20	20	25	1	1	1
C29H11orf54	0	9	0	0	2	3	4	1	1	0	0	0	0	1	0	3	0	3	0	3	0	1	0	2	1	3	0	0	0	1	0	0	0	0	0	0	0	0	0	0	0	0	1	0	0	0	1	0	4
C29H11orf68	0	0	0	0	0	0	0	0	0	0	0	0	0	0	1	1	0	0	2	0	0	0	0	0	0	0	2	0	0	0	0	0	0	2	0	0	2	1	0	0	0	2	0	1	0	0	0	0	0
C29H11orf80	5	35	13	19	18	18	50	12	22	36	40	37	49	29	32	34	36	40	40	31	29	58	24	33	31	28	65	34	39	44	19	27	33	26	25	20	26	33	51	49	35	58	43	39	19	38	37	30	15
C29H11orf86	0	0	0	1	0	0	0	0	0	0	3	2	0	0	0	1	0	1	3	2	0	1	2	0	0	0	0	4	3	0	0	0	0	0	0	0	0	0	0	0	1	2	2	0	0	2	0	0	0
C29H11orf95	0	1	0	0	0	1	0	0	2	0	0	0	2	1	1	0	0	0	2	0	0	0	2	1	6	2	4	1	1	0	2	0	3	2	1	0	0	3	2	0	0	1	2	0	1	2	0	1	0
C29H11orf98	1191	915	488	1089	1258	1101	884	1013	927	1095	690	741	1068	781	964	836	733	1018	1159	929	525	564	597	583	1348	1135	1156	914	852	879	401	603	944	685	501	510	490	833	1240	1345	1229	1373	1099	746	388	865	976	563	544
C2CD2	0	2	0	0	0	0	1	0	0	0	0	1	3	0	1	0	1	0	4	0	0	0	0	0	4	1	1	0	0	2	0	2	5	1	1	0	2	1	0	0	2	1	2	0	1	1	3	1	1
C2CD2L	0	5	0	1	0	1	1	4	4	4	4	7	8	4	15	3	4	0	5	4	3	3	0	2	6	5	4	4	4	4	4	14	10	3	10	2	8	2	0	9	1	3	3	4	9	10	5	0	0
C2CD3	13	26	10	20	9	13	28	16	16	7	11	13	22	9	5	14	17	31	41	16	9	7	12	19	30	29	40	19	24	9	5	4	10	11	4	9	13	11	5	25	10	4	11	4	4	9	12	7	0
C2CD4B	0	0	0	0	0	0	0	0	0	0	0	0	0	1	0	0	0	0	0	0	0	0	0	0	0	0	0	0	0	0	0	0	0	0	0	0	0	0	0	0	0	0	0	0	0	0	0	0	0
C2CD4C	0	0	0	0	0	0	0	0	0	0	0	0	0	0	0	0	0	0	0	0	0	0	0	0	0	0	0	0	0	0	0	0	0	0	0	0	0	0	0	0	0	0	0	0	0	0	0	0	0
C2CD4D	0	0	0	0	0	0	0	0	0	0	0	0	0	0	0	0	0	0	0	0	0	0	0	0	0	0	0	0	0	0	0	0	0	0	0	0	0	0	0	0	0	0	0	0	0	0	0	0	0
C2CD5	84	82	86	84	98	68	125	94	189	135	160	128	138	75	121	108	90	122	128	142	188	217	156	100	125	98	138	129	175	131	63	159	102	99	74	97	80	75	156	142	121	125	141	199	230	194	130	67	59
C2CD6	0	0	0	0	0	0	2	0	0	0	0	2	0	1	6	1	0	6	0	2	4	4	0	0	0	0	0	1	3	0	0	0	0	0	0	0	0	0	0	0	0	0	0	0	0	0	0	0	0
C2H2orf66	268	570	301	476	411	300	382	392	340	393	365	334	360	344	467	379	470	541	369	312	181	218	280	299	389	361	507	439	424	419	127	245	292	179	295	224	235	376	258	266	277	248	446	199	199	445	567	300	238
C2H2orf69	4	13	7	21	16	19	12	11	27	34	15	6	14	19	37	16	18	28	34	23	16	16	28	25	22	25	22	42	18	19	35	69	54	37	47	32	38	36	59	76	42	53	23	35	45	58	18	12	13
C2H2orf72	0	0	0	0	0	0	0	0	0	0	0	0	0	0	0	0	0	0	0	0	0	0	0	0	0	0	0	0	0	0	0	0	0	0	0	0	0	0	0	0	0	0	0	0	0	0	0	2	0
C2H2orf76	179	116	34	199	296	197	97	157	131	153	38	63	92	67	78	61	43	57	69	68	23	33	42	34	78	85	100	112	110	123	19	50	72	52	38	32	29	49	53	92	102	78	66	50	36	74	31	20	20
C2H2orf80	46	35	26	68	55	49	40	39	49	50	34	45	28	23	49	33	21	28	37	37	24	21	30	52	26	22	48	34	38	70	14	36	28	26	20	19	30	29	31	37	39	37	24	21	25	12	21	7	16
C2H2orf88	1	0	0	0	0	0	0	2	0	1	3	3	0	0	0	2	0	1	0	2	0	0	0	0	1	0	0	0	4	4	2	2	0	3	0	2	3	1	3	0	9	6	3	0	0	0	0	2	3
C3	0	0	0	0	0	0	0	0	0	0	0	0	0	0	0	0	0	0	0	0	0	0	0	0	0	1	0	0	0	0	0	1	0	0	0	0	0	0	0	0	0	0	0	0	0	0	0	0	0
C3AR1	0	0	0	0	0	0	0	0	0	0	0	0	0	0	0	0	0	0	0	0	0	0	0	0	0	0	0	0	0	0	0	0	0	0	0	0	0	0	0	0	0	0	1	0	0	0	0	0	0
C3H1orf109	0	11	5	6	8	9	13	4	8	7	14	14	28	35	33	27	33	31	33	36	38	22	29	25	33	24	12	13	3	16	22	47	53	43	35	38	26	54	82	78	70	75	19	9	17	25	30	27	20
C3H1orf123	23	61	34	88	55	121	49	66	31	49	35	34	49	37	46	32	57	48	71	54	16	36	36	33	48	52	69	53	26	57	29	27	40	29	21	25	26	44	54	44	40	60	42	30	23	33	44	56	30
C3H1orf141	0	0	0	0	0	0	0	0	0	0	0	0	0	0	0	0	0	0	0	0	0	0	0	0	0	0	0	0	0	0	0	0	1	0	0	0	0	0	0	0	0	0	0	0	0	0	0	0	0
C3H1orf146	7	12	6	26	8	25	22	16	9	19	11	6	5	8	17	5	5	9	16	11	4	8	1	8	8	9	11	11	1	4	0	4	8	10	0	1	4	10	15	11	13	10	17	6	3	6	2	4	4
C3H1orf162	0	0	0	0	0	0	0	0	0	0	0	1	0	1	0	0	0	1	0	0	0	0	0	0	0	0	0	0	1	3	0	0	0	0	0	0	0	0	0	0	0	0	0	0	0	0	0	0	0
C3H1orf185	0	0	0	0	0	0	0	0	0	0	0	0	0	0	0	0	0	0	0	0	0	0	0	0	0	0	0	0	0	0	0	0	0	0	0	0	0	0	0	0	0	0	0	0	0	0	0	0	0
C3H1orf189	0	0	0	0	0	0	0	0	0	0	0	2	0	0	0	0	0	0	1	0	1	1	0	0	0	0	1	0	0	0	0	1	0	1	0	2	0	0	0	0	0	1	0	0	0	0	2	0	0
C3H1orf194	0	4	6	5	11	8	0	2	5	4	2	0	1	3	3	7	5	1	3	5	1	4	4	12	19	10	5	2	3	1	1	0	1	4	0	0	0	0	1	1	1	0	2	6	2	1	3	1	2
C3H1orf210	2	0	0	0	0	0	0	0	0	2	4	2	4	2	3	1	0	1	2	2	0	0	0	0	0	1	1	2	0	0	0	0	3	0	1	2	0	4	11	5	4	0	0	0	1	1	3	1	2
C3H1orf216	0	0	0	0	0	0	0	0	0	0	0	0	0	0	0	0	0	0	0	1	0	0	0	0	0	0	0	0	0	0	0	0	0	0	2	0	0	0	0	0	0	0	0	0	0	0	0	0	0
C3H1orf226	1	5	4	1	5	2	9	3	7	2	3	7	8	7	1	8	4	4	10	10	4	3	13	1	7	6	6	11	12	7	5	4	7	5	7	6	8	4	13	11	6	7	5	6	15	10	7	3	1
C3H1orf43	2	29	17	20	13	32	39	20	26	55	42	43	89	48	64	65	66	66	82	66	41	51	62	49	72	69	78	66	32	48	47	123	106	114	103	124	94	111	200	225	166	225	105	134	76	146	137	100	63
C3H1orf50	4	31	31	33	16	29	43	31	22	33	24	40	32	14	31	36	40	30	52	60	15	22	18	19	27	34	51	26	17	17	8	28	33	22	17	11	11	15	31	37	23	37	38	17	12	31	24	8	5
C3H1orf52	12	3	5	11	6	6	9	9	14	6	13	12	14	13	20	20	12	17	18	15	3	12	10	7	24	18	40	14	13	7	7	4	10	8	11	2	4	8	27	18	16	11	9	12	7	14	15	12	9
C3H1orf54	0	1	1	0	0	1	0	0	0	0	0	0	0	0	0	0	0	0	1	0	0	0	0	0	1	0	0	0	0	0	1	0	1	0	1	1	0	0	0	0	0	0	0	0	0	0	0	0	0
C3H1orf56	0	0	0	0	0	0	0	0	0	0	0	0	4	2	4	0	6	0	0	0	1	0	0	0	0	1	0	1	0	3	0	0	3	1	0	0	2	0	2	2	2	3	0	7	0	0	1	1	0
C3H1orf68	0	0	0	0	0	0	0	0	0	0	0	0	0	0	0	0	0	0	0	0	0	0	0	0	0	0	0	0	0	0	0	0	0	0	0	0	0	0	0	0	0	0	0	0	0	0	0	0	0
C3H1orf87	0	0	0	0	1	0	0	0	0	0	0	0	0	0	0	0	0	0	0	0	0	0	0	0	0	0	0	0	0	0	0	0	0	0	0	0	0	0	0	0	0	0	0	0	0	0	0	0	0
C3H1orf94	0	0	0	0	0	0	0	0	0	0	0	0	0	0	0	0	0	0	0	0	0	0	0	0	0	0	0	0	0	0	0	0	0	0	0	0	0	0	0	0	0	0	0	0	0	0	0	0	0
C3H2orf54	0	0	0	0	0	0	0	0	0	0	0	0	0	0	0	0	0	0	0	0	0	0	0	0	0	0	0	0	0	0	0	0	0	0	0	0	0	0	0	0	0	0	0	0	0	0	0	0	0
C4A	0	0	0	0	0	0	0	0	0	0	0	0	0	0	0	0	0	0	0	0	0	0	1	0	0	0	0	0	0	0	0	0	0	0	0	0	0	0	0	0	0	0	1	0	0	0	0	0	0
C4BPA	0	0	0	0	0	0	0	0	0	0	0	0	0	0	0	0	0	0	0	0	0	0	0	0	0	0	0	0	0	0	0	0	0	0	0	0	0	0	0	0	0	0	0	0	0	0	0	0	0
C4BPB	0	0	0	0	0	0	0	0	0	0	0	0	0	0	0	0	0	0	1	0	0	0	0	0	0	0	0	0	0	0	0	0	0	0	0	0	0	0	0	0	0	0	0	0	0	0	0	0	0
C4H7orf25	5	82	32	39	18	25	107	40	93	68	150	129	173	119	134	107	147	166	220	177	112	121	144	107	113	155	160	87	70	96	135	213	213	162	114	133	124	208	282	309	290	301	141	153	101	155	184	115	84
C4H7orf31	14	18	21	14	3	17	6	9	14	10	20	11	12	6	48	69	59	73	78	102	65	52	36	50	23	14	79	57	21	17	14	45	57	27	26	42	18	51	51	53	58	94	69	51	44	63	81	28	30
C4H7orf57	15	3	5	12	1	3	6	4	8	5	0	2	19	22	14	13	0	7	4	12	12	3	12	1	14	14	23	7	8	8	13	14	15	9	5	12	6	11	17	7	3	8	23	15	16	19	12	6	11
C5	2	12	9	26	5	21	21	22	14	17	11	10	3	21	7	2	6	7	11	5	3	3	14	14	18	31	18	23	8	4	16	24	22	28	14	4	7	12	25	15	26	32	16	14	6	18	21	19	11
C5AR1	0	0	0	0	0	0	0	0	0	0	0	0	0	5	0	0	0	0	0	0	0	0	0	0	0	0	0	0	0	0	0	4	0	0	0	0	0	0	0	0	0	0	0	0	0	0	3	0	0
C5AR2	0	0	0	0	0	0	0	0	0	0	0	0	0	0	0	0	0	0	0	0	0	0	0	0	0	0	0	0	0	0	0	0	0	0	0	0	0	0	0	0	0	0	0	0	0	0	0	0	0
C5H12orf10	2	11	9	12	9	6	13	9	15	11	23	16	8	16	24	14	10	25	17	20	12	29	26	16	8	9	19	15	5	7	6	12	8	10	6	5	11	8	31	22	37	21	7	3	2	23	17	17	9
C5H12orf29	8	25	13	54	21	33	21	16	26	41	14	18	48	34	53	39	45	39	51	32	13	21	25	17	66	56	41	34	32	38	30	41	32	22	27	34	48	41	71	71	58	91	47	35	31	38	45	23	31
C5H12orf4	6	112	45	54	24	31	108	50	71	96	99	99	139	122	188	204	302	331	286	228	115	99	185	182	200	161	100	85	131	113	150	173	233	198	129	107	109	191	414	383	438	343	266	142	109	232	371	203	177
C5H12orf40	97	107	107	152	91	118	123	68	230	195	81	115	110	132	130	120	118	134	177	126	63	91	77	132	186	132	160	140	119	117	88	78	135	108	57	66	65	100	127	148	133	129	178	120	90	143	143	101	72
C5H12orf42	0	0	0	0	0	0	0	0	0	0	0	0	0	0	0	0	0	0	0	0	0	0	0	0	0	0	0	0	0	0	0	0	0	0	0	0	0	0	0	0	0	0	0	0	0	0	0	0	0
C5H12orf45	61	186	81	136	91	93	124	103	139	157	146	163	247	172	213	188	196	276	185	141	128	121	187	118	246	264	287	206	160	175	85	128	180	131	119	99	76	132	166	171	171	136	166	135	111	126	186	119	112
C5H12orf50	8	1	2	15	4	9	1	9	0	1	4	7	4	5	1	5	9	10	2	3	4	3	5	8	9	5	13	7	13	1	4	5	4	4	5	1	1	0	7	0	0	0	6	1	2	3	14	5	3
C5H12orf54	0	0	3	0	0	0	2	0	2	0	0	0	0	0	0	0	0	0	0	0	0	0	0	0	0	0	0	0	0	0	0	0	2	0	0	0	0	0	0	0	0	0	1	0	0	0	1	1	0
C5H12orf56	0	0	0	1	2	2	1	0	0	0	4	1	0	0	2	1	0	0	4	0	1	0	0	0	2	2	2	0	0	0	0	0	0	0	0	0	1	2	0	0	0	0	0	0	0	0	0	0	0
C5H12orf57	8	20	4	25	14	24	14	7	10	17	16	21	19	28	41	32	31	31	29	13	17	15	18	20	70	50	30	22	17	21	10	14	18	19	8	14	8	15	21	24	17	19	32	27	21	42	23	6	9
C5H12orf60	1	8	2	6	6	3	3	6	1	1	1	0	1	2	3	3	1	0	1	2	0	1	1	0	1	3	9	4	12	3	2	1	6	1	2	0	0	2	4	9	6	4	5	0	2	0	4	0	0
C5H12orf66	2	10	6	12	12	27	13	7	8	18	13	11	3	2	23	24	19	13	13	30	5	7	4	16	13	16	12	15	5	4	12	24	27	17	6	5	16	4	14	6	18	21	6	3	3	4	9	8	7
C5H12orf71	0	0	0	0	0	0	0	0	0	0	0	0	0	0	0	0	0	0	0	0	0	0	0	0	0	0	0	0	0	0	0	0	0	0	0	0	0	0	0	0	0	0	0	0	0	0	0	0	0
C5H12orf73	143	69	57	185	128	103	64	74	99	95	90	91	80	56	96	84	55	75	71	71	35	45	38	56	108	113	124	108	111	93	21	17	24	22	32	38	37	36	29	40	49	59	66	54	30	55	39	28	32
C5H12orf75	0	6	2	11	3	4	8	3	7	5	5	0	11	12	13	19	8	12	12	5	1	6	3	2	4	9	19	10	2	2	3	2	9	8	3	8	3	8	2	2	4	16	8	7	10	5	0	2	1
C5H12orf80	0	0	0	0	0	0	0	0	0	0	0	0	0	0	0	0	0	0	0	0	0	0	0	0	0	0	0	0	0	0	0	0	0	0	0	0	0	0	0	0	0	0	0	0	0	0	0	0	0
C5H22orf23	0	2	0	0	0	1	1	0	0	0	0	0	1	1	1	0	3	0	0	2	0	2	0	2	0	1	0	1	0	2	1	0	0	0	0	0	0	0	0	0	1	0	0	0	0	0	1	0	0
C5H22orf46	12	50	44	11	24	15	21	21	35	59	89	91	107	120	151	197	169	162	203	185	110	158	138	92	120	112	117	97	120	137	92	153	151	121	120	195	138	240	233	271	259	212	179	96	60	144	133	104	64
C6	0	0	0	0	0	0	0	0	0	0	0	0	0	0	0	0	0	0	0	0	0	0	0	0	0	0	0	0	0	0	0	0	0	0	0	0	0	0	0	0	0	0	0	0	0	0	0	0	0
C6H4orf17	10	57	16	79	17	31	27	27	47	35	40	47	58	44	37	27	54	54	58	37	25	31	31	37	46	51	68	48	44	25	16	9	33	20	18	19	19	21	37	40	43	47	31	18	20	24	59	28	17
C6H4orf19	0	1	0	0	0	0	0	0	0	0	0	0	6	1	2	1	0	0	2	1	0	1	1	2	0	2	0	2	1	0	3	3	1	0	3	2	2	0	2	0	0	1	0	0	3	1	2	0	0
C6H4orf3	38	29	29	50	49	69	40	27	29	45	38	41	57	49	60	46	28	43	48	30	31	33	56	23	44	38	104	66	58	62	31	40	72	37	59	47	48	58	60	86	85	62	104	73	92	85	78	47	39
C6H4orf36	0	0	0	0	0	0	0	0	0	0	0	0	0	0	1	1	1	0	2	0	1	0	0	0	0	1	0	0	1	0	0	0	0	0	1	1	1	0	3	1	1	0	1	0	0	0	0	0	2
C6H4orf48	0	0	0	0	0	0	0	4	0	0	0	0	0	0	1	1	0	0	1	0	1	0	0	0	1	1	4	1	4	4	2	0	0	0	0	0	0	0	0	0	0	0	0	0	0	1	0	0	0
C6H4orf50	0	0	0	0	0	0	0	0	0	0	2	0	2	0	0	0	0	0	0	0	0	0	0	0	0	0	2	0	0	2	2	0	0	0	0	1	0	0	0	1	0	2	0	0	1	0	0	0	0
C6H4orf54	0	0	0	0	0	0	0	0	0	0	0	0	0	0	0	0	0	0	0	0	0	0	0	0	0	0	0	0	0	0	0	0	0	0	0	0	0	0	0	0	0	0	0	0	0	0	0	0	0
C7	0	1	0	0	0	0	0	0	0	0	0	0	1	0	0	0	0	0	0	0	0	0	0	0	0	2	0	0	0	0	0	0	0	0	0	2	0	0	0	0	0	0	0	0	0	0	0	0	0
C7H19orf24	1	4	2	0	1	1	3	4	8	4	1	6	4	5	3	2	10	6	8	2	0	2	3	5	3	6	7	6	4	1	0	7	7	6	3	3	8	4	7	6	1	2	2	3	1	1	7	3	3
C7H19orf25	0	0	0	0	0	5	0	0	0	2	0	0	1	0	2	2	2	0	2	2	1	0	1	0	0	1	2	1	1	0	0	0	0	0	0	0	0	0	0	0	1	0	0	1	0	1	0	0	0
C7H19orf38	0	0	0	0	0	0	2	0	1	1	0	0	2	1	2	0	3	1	4	0	0	5	1	0	0	0	0	0	1	1	0	0	0	1	0	0	0	0	2	1	7	1	0	2	1	3	2	1	2
C7H19orf44	32	45	35	28	22	28	49	40	52	59	31	34	25	26	50	31	26	32	39	23	19	24	26	27	26	31	45	35	58	48	17	24	27	10	9	22	17	24	25	16	18	47	36	14	23	16	20	20	7
C7H19orf53	2	12	3	6	5	9	7	9	4	5	9	15	13	9	16	7	14	15	17	18	5	3	6	8	17	15	20	14	8	9	3	4	8	10	9	2	7	10	11	5	10	14	8	11	2	8	12	6	6
C7H19orf57	0	4	0	1	2	0	3	1	2	0	9	4	7	9	19	5	13	11	5	6	12	9	15	3	14	15	13	4	0	3	16	24	10	22	14	39	25	13	45	38	19	44	8	26	27	15	7	35	8
C7H19orf66	0	2	1	2	3	1	9	5	3	2	4	1	7	8	6	7	9	12	15	18	7	5	7	6	13	5	6	8	4	1	7	3	8	5	3	8	9	8	9	11	9	16	5	7	7	12	4	3	3
C7H19orf67	1	15	8	9	7	15	17	12	14	6	36	23	23	30	39	17	25	37	35	24	8	18	23	22	18	17	22	17	21	16	10	20	15	10	18	19	27	19	46	53	52	48	28	30	31	27	3	14	14
C7H19orf70	3	12	4	11	2	15	7	10	4	10	10	11	7	10	3	5	10	5	7	6	7	4	5	5	4	10	13	9	5	11	3	9	3	1	0	3	2	6	11	15	9	7	8	10	2	12	8	7	2
C7H19orf71	0	0	0	0	0	0	0	0	0	0	0	0	0	0	0	0	0	0	0	0	0	0	0	0	0	0	0	0	0	0	0	0	0	0	0	0	0	0	0	0	0	0	0	0	0	0	0	0	0
C7H1orf35	34	83	38	60	34	62	86	54	89	52	65	71	117	72	138	77	74	105	104	97	40	57	64	55	111	129	135	88	110	140	33	34	56	27	39	41	42	45	69	58	73	80	100	58	34	86	78	31	30
C7H5orf15	16	33	17	43	31	34	14	14	33	23	8	38	38	45	47	29	29	17	22	37	15	32	32	27	54	55	38	55	42	38	12	25	15	25	13	15	8	22	39	35	35	30	36	34	12	23	19	27	19
C7H5orf24	13	36	8	11	8	15	27	13	12	12	24	25	44	38	61	27	40	31	53	32	18	18	40	33	51	41	41	35	35	28	23	76	42	44	49	38	28	38	53	75	64	53	49	28	27	28	37	22	18
C7H5orf30	1	3	4	4	6	2	0	1	1	2	1	5	3	2	4	3	7	8	3	5	0	4	2	9	9	6	1	1	0	2	0	8	15	5	0	1	1	8	2	4	9	8	3	0	0	1	0	0	2
C7H5orf46	0	0	0	0	0	0	0	0	0	0	0	2	0	0	0	0	0	0	0	0	0	0	0	0	0	0	0	1	0	0	0	0	0	0	0	0	0	0	0	0	0	0	1	0	0	0	0	0	0
C7H5orf63	13	6	10	12	4	11	21	4	12	10	4	13	12	3	7	6	4	4	3	3	10	9	4	2	20	11	27	18	6	6	2	1	10	7	4	8	3	7	2	1	12	3	9	4	2	5	9	3	7
C8A	0	0	0	0	0	0	0	0	0	0	0	0	1	0	0	0	0	0	0	0	0	0	0	0	4	0	0	0	0	0	0	0	0	0	0	0	0	0	0	0	0	0	0	0	0	0	0	0	0
C8B	6	5	4	10	5	8	6	4	14	6	3	7	8	4	2	8	6	2	3	5	3	4	0	1	8	12	6	8	5	12	5	2	11	3	7	3	1	14	7	4	2	1	9	5	2	4	6	3	4
C8G	0	0	1	0	0	0	0	0	0	1	1	0	0	0	0	0	0	0	0	0	0	0	0	0	0	0	0	0	0	0	0	0	1	0	0	0	0	0	0	0	1	1	0	0	0	1	0	0	0
C8H8orf58	0	3	2	1	0	2	4	1	2	0	1	1	10	1	16	5	6	2	7	7	6	2	9	1	3	4	1	10	1	5	5	16	0	6	4	4	9	14	12	24	21	24	13	13	7	11	11	7	8
C8H8orf74	0	0	0	0	0	0	0	0	0	0	0	0	0	0	0	0	0	0	0	0	0	0	0	0	0	0	0	1	0	0	0	0	0	0	0	0	0	0	0	0	0	0	0	0	0	0	0	0	0
C8H9orf131	0	0	0	0	0	1	0	0	0	0	1	0	0	0	0	0	0	0	0	0	1	0	0	0	0	0	0	0	0	0	0	0	0	0	0	0	0	0	0	0	0	0	0	0	0	0	0	0	0
[truncated: 26,336 more rows]
[truncated: 41 more columns]
