# Supplementary material for: Early transcriptional divergence underlies cell fate bias in bovine embryos
Source: Research Square preprint supplement (doi:10.21203/rs.3.rs-7028131/v1), 2025-07-14
Supplement: Supplementary file 9 [file c45410ad4ecea3bb7da80e1b.docx]

**Reporting Summary**

**Data collection**

Data collection included measurement of individual blastomere diameters prior to RNA extraction, single-cell RNA sequencing (scRNA-seq) of isolated blastomeres, time-lapse monitoring of cavity formation in individually cultured blastomeres, and immunofluorescence staining for CDX2 and SOX2 in blastomeres that formed cavities. All analyses were conducted at the single-blastomere level. Size-based comparisons were consistently performed by selecting the largest and smallest blastomeres from the same embryo to control for inter-embryo variation.

**Study design**

This study aimed to investigate the early emergence of transcriptional and functional asymmetries between sister blastomeres in bovine embryos and their potential association with early lineage bias. Single-cell RNA sequencing was performed on individual blastomeres at successive cleavage stages (1-, 2-, 4-, and 8-cell), and size-associated differences were examined by comparing the largest and smallest blastomeres from the same embryo. Functional potential was assessed through cavity formation and immunofluorescence staining. No randomisation or blinding was applied, but paired comparisons within embryos were used to control for inter-embryo variability.

**Data analysis**

RNA-seq data were processed using Trim Galore for adapter trimming and FastQC for quality assessment. Reads were aligned to the bovine reference genome (ARS-UCD1.2/bosTau9) using STAR and quantified with RSEM. Principal component analysis (PCA) was performed using the prcomp function, and hierarchical clustering was conducted using the pvclust package in R. Transcriptional asymmetry between sister blastomeres was evaluated by calculating SSwe/SS ratios using custom R scripts. Differential gene expression and KEGG pathway enrichment analyses were performed using iDEP and the clusterProfiler package, respectively. Linear mixed-effects models were used for group comparisons in Python (statsmodels), and Fisher’s exact tests were conducted in R. All other analyses were performed using R unless otherwise specified.

**Replication**

Embryos were generated through 15 independent replicates of oocyte collection, in vitro maturation, fertilization, and culture. For scRNA-seq, individual blastomeres were isolated from embryos at the 1-cell (n = 10), 2-cell (n = 10), 4-cell (n = 5), and 8-cell (n = 5) stages. Additionally, 15 8-cell embryos were dissociated, and the largest and smallest blastomeres from each embryo were individually cultured to assess cavity formation. Blastomeres that formed cavities were subjected to immunofluorescence staining for CDX2 and SOX2. Biological replicates were included for each developmental stage, the cavity formation assay, and immunostaining. No technical replicates were performed. Consistent trends were observed across all biological replicates.

**Statistical reporting**

Differential gene expression analysis of RNA-seq data was conducted using DESeq2 with Benjamini-Hochberg correction for multiple testing. KEGG pathway enrichment was assessed using hypergeometric or Fisher’s exact tests with appropriate correction for multiple comparisons. For comparison of gene expression levels between the largest and smallest blastomeres at the 4- and 8-cell stages, linear mixed-effects models were applied using Python (statsmodels), treating blastomere group (largest or smallest) as a fixed effect and embryo ID as a random effect. Cavity formation rates between groups were compared using Fisher’s exact test in R. The number of samples (n), statistical tests, and P-values are provided in the relevant figure legends.

**Material and data availability**

The RNA-seq data generated in this study have been deposited in the Gene Expression Omnibus (GEO) under accession number GSE301333 and remain private until formal publication. All reagents and kits used were commercially available and are listed in the Methods section. Bovine embryos were produced exclusively for experimental use and are not available for distribution.

**Ethics oversight**

As no live animals or human subjects were used in this study, and all experiments were conducted in vitro using bovine oocytes and embryos, no ethical approval was required.
