# Supplementary material for: Early transcriptional divergence underlies cell fate bias in bovine embryos
Source: Research Square preprint supplement (doi:10.21203/rs.3.rs-7028131/v1), 2025-07-14
Supplement: Supplementary file 10 [file d2c8660fb27364532f0038fe.xlsx]

## Sheet: Koyama et al_Source_Data_Suppl 
blastomere_size(um)	52.41	58.35	61.26	47.07	49.36	56.13	47.25	64.95	50.51	60.69
Smallest/Largest	S_1	L_1	L_2	S_2	S_3	L_3	S_4	L_4	S_5	L_5
EmbryoID	8cell_E01_B2	8cell_E01_B4	8cell_E02_B3	8cell_E02_B5	8cell_E03_B3	8cell_E03_B8	8cell_E04_B1	8cell_E04_B5	8cell_E05_B5	8cell_E05_B7
20ALPHA-HSD	0	0	0	0	0	0	0	0	0	0
A1BG	0	0	0	0	0	0	0	1	0	4
A1CF	1	4	5	0	4	2	4	7	19	10
A2M	0	0	0	0	0	0	0	0	0	0
A2ML1	0	0	0	0	0	0	0	0	0	0
A3GALT2	0	0	0	0	0	0	0	0	0	3
A4GALT	0	0	0	0	0	0	0	0	0	0
A4GNT	0	0	0	0	0	0	0	0	0	0
AAAS	36	30	25	21	32	41	92	146	42	34
AACS	213	194	82	349	211	230	558	517	432	543
AADAC	0	0	0	0	0	0	0	0	0	0
AADACL3	0	0	0	0	0	0	0	0	0	0
AADACL4	0	0	0	0	0	0	0	0	0	0
AADAT	200	143	214	385	459	258	281	282	311	362
AAED1	18	13	0	15	2	21	12	4	8	21
AAGAB	22	51	35	41	142	60	77	105	46	193
AAK1	95	80	24	71	104	46	114	105	92	99
AAMDC	1	0	0	0	0	0	0	0	0	0
AAMP	54	67	34	62	75	95	113	115	40	93
AANAT	0	0	0	0	0	0	0	0	0	0
AAR2	17	17	11	0	17	25	15	19	13	57
AARD	12	39	9	4	10	33	43	67	17	103
AARS	43	25	19	52	60	26	32	56	54	23
AARS2	2	0	1	1	0	0	6	3	0	9
AARSD1	98	132	93	183	232	151	152	219	154	310
AASDH	170	183	114	283	318	180	492	418	189	264
AASDHPPT	96	77	45	33	73	52	82	133	100	214
AASS	0	0	0	0	0	0	0	0	0	0
AATF	68	76	29	107	58	64	149	89	118	90
AATK	9	8	4	12	13	9	6	11	8	4
ABAT	114	104	13	50	210	104	201	127	62	122
ABCA1	44	25	30	57	52	19	121	89	53	52
ABCA10	0	0	0	0	0	1	0	1	0	0
ABCA12	0	1	1	0	0	0	3	7	0	0
ABCA13	3	18	6	19	52	21	1	19	50	0
ABCA2	0	0	0	0	0	3	0	6	1	9
ABCA3	2	9	0	1	0	14	1	16	33	65
ABCA4	6	4	11	10	37	7	25	7	15	27
ABCA5	50	49	21	19	41	59	54	59	52	42
ABCA6	0	2	0	2	0	1	0	0	0	0
ABCA7	0	0	0	18	0	2	5	11	0	6
ABCA9	0	0	0	0	0	0	0	0	0	6
ABCB1	259	335	218	337	462	263	427	487	489	484
ABCB10	184	222	162	221	235	176	298	424	209	422
ABCB11	21	15	15	11	22	21	13	15	39	12
ABCB4	0	0	0	0	0	0	0	0	1	0
ABCB5	0	0	0	0	0	0	0	0	0	0
ABCB6	0	0	0	2	1	0	0	0	0	0
ABCB7	24	15	17	28	10	8	101	41	6	46
ABCB8	15	17	8	21	26	15	22	19	12	15
ABCB9	2	11	1	1	5	0	4	1	1	6
ABCC1	9	61	12	36	20	12	74	50	5	33
ABCC10	4	0	5	9	7	0	2	5	0	8
ABCC11	6	8	7	0	8	8	9	7	25	3
ABCC12	0	0	0	0	0	0	0	0	0	0
ABCC2	184	147	41	120	278	225	110	116	246	311
ABCC3	0	0	0	0	4	0	18	6	1	0
ABCC5	16	1	1	18	15	6	30	2	13	0
ABCC6	0	0	0	0	0	0	0	0	0	0
ABCC8	0	0	2	1	2	4	0	5	8	0
ABCC9	0	0	0	0	0	0	0	0	0	0
ABCD1	3	0	0	0	0	0	1	1	0	0
ABCD2	5	0	3	8	1	4	0	13	9	33
ABCD3	125	190	68	176	295	156	425	392	222	311
ABCD4	18	9	4	47	20	2	24	33	0	8
ABCE1	215	124	90	230	147	127	389	379	232	349
ABCF1	172	155	175	239	270	184	268	332	248	410
ABCF2	808	677	319	619	1074	760	788	914	819	1306
ABCF3	131	171	81	135	208	225	266	294	112	248
ABCG1	0	0	0	0	0	0	0	0	0	0
ABCG2	18	34	46	41	58	99	53	70	110	125
ABCG4	0	5	0	15	5	13	4	3	3	0
ABCG5	52	66	39	70	136	90	54	82	104	96
ABCG8	79	72	70	75	168	118	119	159	117	168
ABHD1	0	0	0	0	0	0	0	0	0	3
ABHD10	375	394	215	415	583	471	778	837	515	724
ABHD11	75	77	36	90	116	87	106	103	101	252
ABHD12	11	49	7	17	6	63	9	40	4	57
ABHD12B	0	0	0	0	0	3	0	0	0	0
ABHD13	0	4	0	0	0	0	0	1	0	24
ABHD14A	0	0	0	2	1	0	0	0	0	8
ABHD14B	0	0	4	0	9	9	0	0	0	0
ABHD15	0	0	0	0	0	0	0	0	0	0
ABHD16A	29	52	19	60	49	51	119	95	91	56
ABHD16B	0	0	0	0	0	2	0	2	0	5
ABHD17A	3	38	0	3	3	54	3	11	27	78
ABHD17B	57	121	12	13	56	122	28	208	87	116
ABHD17C	22	31	6	17	57	63	18	11	12	79
ABHD18	502	526	367	608	860	605	968	978	920	906
ABHD2	5	0	0	0	12	8	2	3	3	11
ABHD3	94	128	106	181	79	90	210	268	147	121
ABHD4	250	190	113	211	254	171	461	546	434	467
ABHD5	32	27	10	21	40	13	12	14	81	80
ABHD6	34	59	37	71	52	47	47	59	35	138
ABHD8	13	18	3	3	20	13	5	19	27	38
ABI1	1682	1384	807	1905	2743	1639	2172	2294	2362	2315
ABI2	181	249	49	147	110	153	236	350	321	316
ABI3	0	1	0	0	0	0	0	0	0	0
ABI3BP	399	289	146	243	384	266	477	366	247	349
ABL1	40	79	37	47	74	75	38	74	55	293
ABL2	17	29	14	20	38	41	28	32	37	64
ABLIM1	360	433	124	539	556	288	567	547	491	627
ABLIM2	0	0	0	4	0	0	0	0	0	2
ABLIM3	91	66	37	63	101	94	208	154	171	253
ABO	0	0	0	0	0	0	0	0	0	0
ABR	98	63	57	95	157	81	126	106	91	264
ABRA	0	0	0	0	0	1	0	2	0	4
ABRACL	38	79	21	57	61	64	22	75	69	160
ABRAXAS1	287	228	161	352	371	330	388	417	216	572
ABRAXAS2	392	490	246	447	801	482	576	694	812	1252
ABT1	217	165	98	318	349	272	165	255	251	413
ABTB1	2	0	0	3	0	0	0	0	1	1
ABTB2	23	10	9	37	13	23	57	43	24	39
ACAA1	70	59	25	37	64	67	67	58	59	120
ACAA2	39	103	62	61	119	77	83	107	90	241
ACACA	73	61	58	94	172	112	209	100	175	157
ACACB	4	7	3	4	24	7	8	33	15	30
ACAD10	4	5	9	0	0	9	12	0	34	0
ACAD11	84	47	30	86	107	62	118	148	50	30
ACAD8	1	3	0	0	0	1	1	5	3	17
ACAD9	11	29	8	68	63	28	52	38	20	34
ACADL	0	17	2	12	17	4	0	3	0	0
ACADM	18	28	46	102	87	25	78	105	37	75
ACADS	26	14	10	15	39	41	23	26	41	52
ACADSB	235	138	65	279	299	225	309	302	240	331
ACADVL	45	42	30	41	79	51	92	98	80	54
ACAN	0	4	0	0	0	0	4	0	2	2
ACAP1	3	0	4	3	6	7	1	4	1	0
ACAP2	45	54	25	54	67	50	102	92	47	83
ACAP3	0	3	2	5	1	4	3	10	0	20
ACAT1	26	32	16	5	74	19	26	64	56	156
ACAT2	694	566	281	571	744	637	237	384	711	1016
ACBD3	120	352	60	44	72	392	168	132	127	441
ACBD4	23	6	8	18	56	24	18	21	25	38
ACBD5	11	48	61	93	45	18	251	156	52	49
ACBD6	0	0	0	3	3	1	6	0	1	0
ACBD7	12	17	9	3	19	30	14	0	12	59
ACCS	1	1	1	4	2	0	0	1	10	1
ACCSL	8305	8424	6428	13396	14671	10811	28725	31561	13493	21123
ACD	135	121	80	82	216	129	85	98	203	227
ACE	0	0	0	0	0	2	0	0	5	4
ACE2	0	0	0	0	0	0	0	7	0	0
ACE3	0	0	0	0	1	1	0	0	0	0
ACER1	0	0	0	0	0	0	0	0	2	1
ACER2	7	0	4	0	4	0	12	10	0	0
ACER3	83	62	18	59	75	79	49	79	72	146
ACHE	0	0	0	0	0	0	0	0	0	0
ACIN1	35	38	35	59	38	38	96	78	50	125
ACKR1	0	0	0	0	0	0	0	0	0	0
ACKR2	1	0	0	0	6	4	15	1	6	0
ACKR3	0	0	0	0	0	0	0	0	0	0
ACKR4	0	0	0	0	0	0	0	0	0	0
ACLY	1158	789	520	1395	1433	955	1472	1399	1240	974
ACMSD	0	0	0	0	0	0	0	0	0	0
ACO1	74	85	39	88	81	88	94	120	160	177
ACO2	58	64	29	46	92	67	63	67	119	121
ACOD1	3	0	0	0	0	0	0	0	0	0
ACOT11	0	3	0	0	1	1	1	0	2	0
ACOT12	1	0	0	0	0	0	0	0	1	0
ACOT13	7	12	6	24	34	42	11	34	3	23
ACOT2	59	58	16	19	25	51	61	49	46	88
ACOT4	0	0	0	4	0	0	0	0	0	0
ACOT6	0	0	1	0	0	0	0	0	0	0
ACOT7	14	10	4	8	14	9	1	20	7	28
ACOT8	8	19	5	9	21	17	11	14	23	40
ACOT9	343	241	141	187	341	366	248	259	240	354
ACOX1	20	30	7	90	5	18	115	107	52	75
ACOX2	0	0	0	0	0	0	0	0	0	0
ACOX3	0	0	0	0	2	0	0	5	0	3
ACOXL	0	2	1	4	2	7	2	4	8	8
ACP1	96	116	25	27	78	122	46	64	226	241
ACP2	5	9	8	9	13	7	8	6	9	13
ACP4	0	1	0	0	0	0	0	0	0	0
ACP5	0	0	0	1	0	3	0	0	7	11
ACP6	105	113	46	77	76	115	112	173	95	188
ACP7	0	0	0	0	0	0	1	4	0	0
ACPP	0	0	0	0	0	0	0	0	0	0
ACR	0	0	0	0	0	0	0	0	0	0
ACRBP	0	0	0	0	0	0	0	0	0	0
ACRV1	37	40	13	47	50	19	49	105	46	165
ACSBG1	0	0	0	0	0	4	0	0	0	0
ACSBG2	0	0	0	0	1	0	0	0	0	7
ACSF2	0	0	0	6	0	0	0	0	0	0
ACSF3	0	1	2	0	0	0	0	2	0	0
ACSL1	30	22	13	3	56	16	25	23	9	15
ACSL3	535	515	310	822	569	360	1000	759	506	437
ACSL4	22	33	14	19	52	43	45	67	18	41
ACSL5	65	27	28	75	46	35	66	48	103	40
ACSL6	16	9	7	22	22	18	9	7	23	28
ACSM1	0	0	0	0	0	0	0	0	0	0
ACSM2B	0	0	0	0	0	0	0	0	0	0
ACSM3	4	1	1	5	1	3	1	0	3	3
ACSM4	70	52	27	78	61	84	89	128	121	114
ACSM5	0	0	0	0	0	0	0	0	0	0
ACSS1	0	0	0	0	0	6	9	0	0	0
ACSS2	15	3	3	0	5	3	16	11	29	7
ACSS3	10	0	13	0	0	8	10	0	0	1
ACTA1	0	0	0	0	0	0	0	0	0	5
ACTA2	4	16	3	7	0	0	8	10	4	18
ACTB	1178	1400	891	1740	1874	1389	3335	3272	2261	3013
ACTBL2	0	0	0	0	0	0	0	0	0	0
ACTC1	0	0	0	0	4	0	0	0	0	8
ACTG1	264	337	240	366	565	421	1090	1061	614	784
ACTG2	0	0	0	0	0	0	0	0	0	0
ACTL6A	150	138	48	108	197	137	207	230	277	215
ACTL6B	0	0	0	0	0	4	3	1	0	0
ACTL7A	0	0	0	0	0	0	0	0	0	0
ACTL7B	0	0	6	2	6	1	0	3	0	0
ACTL8	14	12	1	3	3	2	36	14	3	3
ACTL9	0	0	0	0	0	0	1	0	0	1
ACTN1	183	166	18	215	50	245	130	214	234	325
ACTN2	0	3	1	0	0	0	0	0	1	0
ACTN3	0	0	0	0	0	0	0	0	0	0
ACTN4	101	89	43	119	97	65	91	94	70	141
ACTR10	98	118	84	174	95	116	259	287	237	276
ACTR1A	206	168	63	158	225	129	303	281	251	343
ACTR1B	3	3	0	0	4	3	0	1	7	5
ACTR2	406	451	245	600	693	425	504	793	700	695
ACTR3	333	268	176	307	417	344	552	488	348	648
ACTR3B	0	5	0	0	0	7	4	11	7	31
ACTR5	0	1	0	0	0	0	0	16	3	0
ACTR6	305	225	163	220	417	238	174	289	255	328
ACTR8	69	61	30	69	64	36	86	148	119	45
ACTRT2	0	0	0	0	0	0	0	0	0	0
ACTRT3	0	3	0	0	9	3	0	0	17	22
ACVR1	37	44	18	45	52	42	20	42	28	61
ACVR1B	24	21	12	18	45	29	27	53	25	80
ACVR1C	0	0	0	0	0	0	0	0	0	0
ACVR2A	26	55	14	14	6	88	51	49	37	180
ACVR2B	25	68	5	5	49	31	32	33	34	77
ACVRL1	0	0	1	1	0	0	0	0	0	0
ACY1	5	1	4	3	0	4	0	8	0	0
ACYP1	7	11	8	19	24	21	14	23	17	45
ACYP2	3	2	10	16	34	20	9	1	32	25
ADA	7	5	9	8	14	34	20	8	24	34
ADA2	0	0	0	0	0	0	0	0	0	0
ADAD1	146	146	60	152	150	131	164	146	253	356
ADAD2	8	7	2	16	16	9	13	9	3	9
ADAL	71	107	55	95	71	118	91	100	107	159
ADAM10	463	371	199	496	798	399	730	616	527	804
ADAM11	8	22	7	5	19	13	8	18	12	35
ADAM12	16	6	5	14	12	23	17	27	16	29
ADAM15	1	0	0	0	0	0	6	0	0	0
ADAM17	22	40	32	87	88	55	78	94	77	115
ADAM18	0	0	0	0	0	0	0	0	0	0
ADAM19	326	309	156	315	345	259	571	539	615	1153
ADAM1A	0	0	0	0	0	0	0	0	0	0
ADAM2	0	0	0	0	0	0	0	0	0	0
ADAM20	0	1	0	0	0	0	0	0	0	0
ADAM21	0	0	0	0	0	0	1	0	0	0
ADAM22	0	6	4	0	11	0	7	9	4	29
ADAM23	0	11	0	1	0	3	0	0	2	2
ADAM29	0	0	0	0	0	0	0	0	0	0
ADAM32	0	0	0	0	0	0	0	1	3	0
ADAM33	0	0	0	0	0	0	0	0	0	0
ADAM3A	0	0	0	0	0	0	0	0	0	0
ADAM7	0	0	0	0	0	0	0	0	0	0
ADAM8	1	0	1	0	0	0	2	0	0	0
ADAM9	0	7	5	0	10	8	0	6	0	0
ADAMDEC1	0	0	2	0	0	0	0	0	0	10
ADAMTS1	0	0	0	0	0	0	0	0	0	0
ADAMTS10	0	0	0	0	0	0	0	0	0	0
ADAMTS12	8	27	7	35	40	37	34	23	30	25
ADAMTS13	0	0	0	0	0	0	0	0	0	0
ADAMTS14	5	5	3	4	9	2	10	21	10	14
ADAMTS15	0	0	0	0	0	0	0	0	0	0
ADAMTS16	1	0	0	0	6	0	0	0	0	0
ADAMTS17	0	0	1	1	0	2	1	3	0	6
ADAMTS18	116	122	38	104	159	84	162	137	115	154
ADAMTS19	0	0	0	0	0	0	5	4	9	0
ADAMTS2	6	2	0	0	4	1	8	0	0	0
ADAMTS20	8	0	0	0	0	0	1	4	7	0
ADAMTS3	2	0	0	0	3	0	0	3	10	13
ADAMTS4	57	33	23	83	112	59	97	86	49	82
ADAMTS5	0	0	0	0	0	0	0	0	0	0
ADAMTS6	0	0	0	0	2	5	0	3	4	0
ADAMTS7	3	6	1	6	2	14	3	14	18	20
ADAMTS8	0	0	0	0	0	0	0	0	0	3
ADAMTS9	0	1	0	3	14	11	0	5	0	0
ADAMTSL1	74	62	20	90	173	86	79	89	124	147
ADAMTSL2	0	0	0	0	0	0	0	0	0	0
ADAMTSL3	0	0	0	0	0	0	0	0	0	0
ADAMTSL4	0	0	0	0	3	0	0	0	0	0
ADAMTSL5	1	7	8	17	15	8	18	44	5	30
ADAP1	60	49	34	121	68	75	86	81	49	78
ADAP2	0	0	0	0	0	0	0	0	0	0
ADAR	282	283	171	370	357	282	484	436	336	548
ADARB1	0	0	8	10	12	13	2	1	1	18
ADARB2	0	0	0	0	0	0	0	0	0	0
ADAT1	15	4	10	26	15	12	46	24	26	43
ADAT2	6	2	12	3	18	17	48	15	16	14
ADCK1	44	49	47	70	86	53	91	107	100	153
ADCK2	15	19	2	17	6	18	19	18	19	47
ADCK5	6	1	0	14	1	1	0	3	0	3
ADCY1	0	0	0	0	0	0	0	0	0	0
ADCY10	0	0	0	0	0	0	0	0	0	0
ADCY2	7	21	6	0	19	26	18	38	38	32
ADCY3	9	8	5	3	15	17	2	12	12	10
ADCY4	0	0	0	0	0	0	0	0	0	0
ADCY5	2	0	1	3	11	21	1	1	5	1
ADCY6	3	11	0	14	0	13	0	3	15	23
ADCY7	8	5	9	13	6	7	6	27	17	87
ADCY8	0	0	1	0	0	0	0	0	7	15
ADCY9	64	65	25	46	123	66	83	78	110	167
ADCYAP1	0	0	0	0	0	0	0	2	1	14
ADCYAP1R1	0	0	0	4	0	0	0	0	0	0
ADD1	163	179	74	140	134	162	184	197	177	332
ADD2	1	6	0	15	32	23	0	0	67	7
ADD3	684	684	481	1136	1100	700	1942	1820	860	1024
ADGB	0	0	0	0	0	0	0	0	0	0
ADGRA1	0	0	0	0	0	0	0	0	0	0
ADGRA2	11	5	0	0	7	4	0	9	10	10
ADGRA3	57	67	45	83	109	79	61	158	112	116
ADGRB1	0	0	0	0	0	0	0	0	0	0
ADGRB2	6	10	3	7	5	3	0	2	11	35
ADGRB3	25	16	3	8	17	22	13	11	14	19
ADGRD1	0	0	1	8	0	0	0	0	0	0
ADGRD2	0	0	0	0	0	0	0	0	0	3
ADGRE3	0	0	0	0	0	0	0	0	0	0
ADGRE5	45	22	19	42	48	43	35	24	79	106
ADGRF1	0	0	0	0	0	0	0	0	0	0
ADGRF2	0	0	0	0	0	0	0	2	9	10
ADGRF3	0	0	4	0	0	0	0	0	0	3
ADGRF4	0	0	0	0	0	0	0	0	0	0
ADGRF5	0	0	0	0	0	0	0	0	9	0
ADGRG1	37	37	7	28	30	11	22	8	28	11
ADGRG2	21	29	21	32	19	16	60	25	19	26
ADGRG3	1	7	3	10	10	0	11	6	7	14
ADGRG5	0	0	0	0	0	0	0	0	0	0
ADGRG6	0	0	0	0	17	2	13	8	0	17
ADGRG7	0	7	0	0	3	3	6	0	1	13
ADGRL1	0	0	0	5	0	2	1	0	0	10
ADGRL2	11	20	7	16	10	16	20	10	29	38
ADGRL3	7	0	3	0	39	1	7	0	8	1
ADGRL4	0	0	0	0	0	0	0	0	0	0
ADGRV1	42	40	12	48	19	23	80	85	38	51
ADH1C	0	0	0	0	0	0	0	0	0	0
ADH4	0	0	0	0	4	0	5	4	0	0
ADH5	239	249	116	138	308	239	265	299	232	492
ADH6	0	0	0	0	0	0	0	0	0	0
ADH7	0	0	0	0	0	0	0	0	0	0
ADHFE1	2	6	4	15	10	1	25	17	12	63
ADI1	66	52	2	60	11	50	29	70	76	131
ADIG	0	0	0	0	0	0	0	0	0	0
ADIPOQ	0	0	0	0	0	0	0	0	0	0
ADIPOR1	574	493	337	655	792	652	757	1008	1151	1254
ADIPOR2	361	347	138	408	564	438	481	768	527	661
ADIRF	3	4	1	2	3	1	1	8	7	6
ADK	77	16	26	27	57	39	83	97	74	64
ADM	82	51	62	106	166	126	162	99	245	342
ADM2	0	0	0	0	0	0	0	0	0	0
ADM5	1	0	1	1	0	1	4	0	1	2
ADNCR	0	0	0	0	0	0	0	0	0	0
ADNP	8	14	2	17	17	2	1	31	13	10
ADNP2	43	65	45	72	46	50	100	79	69	95
ADO	18	35	5	31	15	18	19	25	15	130
ADORA1	3	0	1	13	4	18	0	6	5	9
ADORA2A	0	0	0	0	0	0	0	0	0	0
ADORA2B	41	66	9	75	34	76	38	48	85	152
ADORA3	0	0	0	0	0	0	0	0	0	0
ADPGK	5	0	6	15	6	4	5	1	0	2
ADPRH	0	2	0	0	0	0	0	0	0	0
ADPRHL1	0	0	0	0	0	0	0	0	0	0
ADPRHL2	0	0	0	0	1	0	0	0	0	0
ADPRM	3	4	5	2	2	6	14	17	15	4
ADRA1A	0	0	0	0	0	0	0	0	0	0
ADRA1B	0	0	0	0	0	0	0	0	0	0
ADRA1D	1	4	0	0	7	1	2	10	1	4
ADRA2A	0	0	0	0	0	0	1	0	0	0
ADRA2B	0	0	0	0	0	0	0	3	0	0
ADRA2C	0	0	0	0	0	0	0	0	0	2
ADRB1	0	0	0	0	0	0	0	0	0	0
ADRB2	0	0	0	0	0	0	0	0	0	0
ADRB3	0	0	0	0	0	0	0	0	0	0
ADRM1	101	136	91	127	144	159	186	132	133	252
ADSL	95	108	87	95	126	104	108	126	144	242
ADSS	266	211	121	171	397	317	210	368	342	518
ADSSL1	0	0	1	0	2	0	0	0	0	0
ADTRP	0	0	0	0	0	2	0	0	0	1
AEBP1	0	0	0	0	0	0	0	0	0	0
AEBP2	23	21	25	22	64	32	23	41	37	59
AEN	8	1	0	0	31	2	0	10	19	25
AES	1	0	0	0	0	1	1	1	0	0
AFAP1	27	25	0	13	9	14	15	22	29	47
AFAP1L1	0	0	0	0	0	0	0	0	0	0
AFAP1L2	77	55	55	196	130	75	250	261	88	125
AFDN	18	16	12	12	17	37	28	30	6	165
AFF1	68	157	62	164	101	144	263	211	95	468
AFF2	0	0	0	0	0	0	0	1	0	0
AFF3	24	16	16	11	17	14	43	38	9	14
AFF4	5	8	0	0	1	2	5	7	0	0
AFG1L	11	7	4	9	6	7	7	32	18	8
AFG3L2	278	422	42	178	61	492	262	701	435	737
AFM	0	0	0	0	0	0	0	0	0	0
AFMID	0	0	1	0	0	0	1	1	0	0
AFP	0	0	0	0	0	0	0	0	0	0
AFTPH	148	110	52	149	268	144	164	181	318	211
AGA	4	3	3	0	2	4	0	1	0	40
AGAP1	2	4	1	1	4	6	1	8	5	8
AGAP2	0	0	0	1	2	2	0	0	4	0
AGAP3	4	9	1	13	3	15	13	5	19	38
AGBL1	0	0	2	0	0	0	0	0	0	0
AGBL2	427	430	248	492	605	418	1032	925	732	708
AGBL3	0	2	2	0	0	0	0	0	0	0
AGBL4	0	0	0	0	0	0	0	8	0	6
AGBL5	39	19	14	32	84	62	55	76	80	85
AGER	0	0	0	0	0	0	0	0	0	0
AGFG1	36	37	19	20	57	85	8	39	44	136
AGFG2	55	46	15	61	88	44	83	66	27	66
AGGF1	57	37	5	26	9	53	56	79	61	126
AGK	1065	994	737	1271	1775	1393	1150	1421	1549	1696
AGL	1	7	0	1	0	4	8	0	4	11
AGMAT	193	236	154	375	396	302	342	350	404	511
AGMO	0	0	0	0	0	0	0	0	0	4
AGO1	19	23	1	15	38	43	0	26	6	88
AGO2	39	30	26	53	34	23	40	28	26	74
AGO3	15	10	0	1	46	9	12	28	33	17
AGO4	0	0	0	4	0	22	0	0	10	22
AGPAT1	71	101	33	90	59	80	68	32	112	134
AGPAT2	0	0	0	0	0	0	0	0	0	0
AGPAT3	9	5	0	3	4	5	2	16	4	45
AGPAT4	0	0	0	0	0	0	0	0	0	0
AGPAT5	13	5	7	4	1	0	14	0	1	60
AGPS	481	1401	152	354	276	1210	476	947	1252	1668
AGR2	0	0	0	0	0	0	0	0	0	0
AGR3	0	0	0	0	0	0	0	0	0	0
AGRN	0	0	0	0	0	1	0	0	0	0
AGRP	0	0	0	0	0	0	0	0	0	1
AGT	0	0	0	0	0	0	0	0	0	0
AGTPBP1	10	27	9	37	11	13	55	6	11	59
AGTR1	0	0	0	0	0	0	0	0	0	0
AGTR2	0	0	0	0	0	0	0	0	0	0
AGTRAP	4	7	3	0	2	8	3	14	13	26
AGXT	0	0	0	0	0	0	0	0	0	0
AGXT2	2	6	0	0	4	2	7	19	6	1
AHCTF1	21	62	29	68	30	56	116	96	78	168
AHCY	90	115	54	121	154	84	101	58	90	146
AHCYL1	29	76	19	21	32	39	77	127	95	120
AHCYL2	389	405	216	257	684	458	498	521	558	700
AHDC1	0	0	0	1	0	0	0	0	0	0
AHI1	27	59	33	65	42	40	119	124	58	176
AHNAK	0	0	0	0	0	0	0	2	0	4
AHNAK2	0	0	0	0	0	0	0	0	0	0
AHR	287	199	125	294	383	245	358	456	480	419
AHRR	0	0	0	0	0	0	0	0	0	0
AHSA1	1021	1106	736	1548	1303	1092	1447	1562	1308	2608
AHSA2	37	16	14	31	73	47	25	30	19	70
AHSG	0	0	0	0	3	0	0	0	7	9
AHSP	0	0	0	0	0	0	0	1	0	0
AICDA	0	0	0	0	0	0	0	0	0	0
AIDA	20	24	10	17	55	14	44	58	37	43
AIF1	0	0	0	0	0	0	0	0	0	0
AIF1L	0	0	0	0	0	0	0	0	0	0
AIFM1	110	132	63	166	151	128	278	278	144	151
AIFM2	0	0	0	0	0	0	0	0	0	0
AIFM3	0	0	0	0	0	0	0	0	0	4
AIG1	0	2	0	0	0	0	0	0	0	0
AIM2	0	0	0	0	0	0	0	0	0	0
AIMP1	14	3	4	12	1	6	2	15	0	0
AIMP2	6	17	15	3	19	11	24	35	4	45
AIP	5	10	3	13	0	10	3	3	18	7
AIPL1	0	0	0	0	0	0	0	0	0	0
AIRE	0	0	0	0	0	0	0	0	0	0
AIRN	0	0	0	0	0	0	0	0	0	0
AJAP1	0	0	0	0	0	0	0	0	0	0
AJM1	0	2	0	0	0	0	0	0	1	0
AJUBA	77	71	55	87	166	131	241	271	91	89
AK1	0	0	0	0	0	2	0	0	3	1
AK2	551	567	324	482	723	671	900	949	677	944
AK3	49	45	24	45	58	41	15	44	62	99
AK4	675	772	250	783	747	666	732	968	1020	1667
AK5	0	0	0	0	0	0	0	0	0	0
AK6	3	3	5	12	10	1	12	8	0	24
AK7	0	0	0	0	0	0	0	2	0	0
AK8	0	0	0	4	0	0	0	0	2	3
AK9	3	0	0	2	7	1	1	6	3	13
AKAIN1	42	18	9	12	53	31	12	21	116	67
AKAP1	45	69	25	55	69	55	119	83	20	206
AKAP10	222	190	69	215	376	239	269	204	196	287
AKAP11	215	353	158	336	331	304	480	575	278	810
AKAP12	21	12	11	81	56	18	69	70	43	48
AKAP13	30	17	15	8	24	46	39	74	47	65
AKAP14	0	0	0	0	0	0	0	0	0	0
AKAP17A	19	72	18	11	26	55	41	48	34	187
AKAP2	0	19	0	0	6	24	0	28	18	0
AKAP3	0	0	0	0	0	0	0	0	0	0
AKAP4	5	10	0	0	32	6	0	0	0	17
AKAP5	2	0	0	0	9	0	0	0	0	0
AKAP6	62	13	34	18	54	41	140	136	23	95
AKAP7	6	11	18	8	15	15	4	13	29	19
AKAP8	98	79	50	114	140	92	149	145	142	138
AKAP8L	66	36	21	54	32	50	74	55	36	34
AKAP9	43	59	117	176	98	67	203	189	74	216
AKIP1	93	77	108	197	116	135	341	390	162	210
AKIRIN1	194	133	103	110	174	136	100	125	205	326
AKIRIN2	993	1479	210	454	402	1479	905	1959	1322	1960
AKNA	0	0	0	0	1	0	0	0	0	0
AKNAD1	0	3	0	2	19	0	0	0	0	0
AKR1A1	20	20	12	3	50	30	40	49	12	50
AKR1B1	730	868	670	1164	1518	1170	1847	2235	1186	2695
AKR1B10	0	0	0	0	0	0	0	0	0	0
AKR1C3	0	0	0	0	0	0	0	0	0	0
AKR1C4	0	0	0	0	0	0	0	0	0	0
AKR1D1	0	0	0	0	0	0	0	0	0	5
AKR7A2	18	18	0	5	0	21	16	25	15	94
AKT1	26	45	6	31	29	37	36	45	30	184
AKT1S1	47	79	13	36	43	77	35	46	42	128
AKT2	0	0	0	2	2	3	0	0	0	5
AKT3	90	81	50	88	74	101	163	220	136	200
AKTIP	493	484	339	579	766	517	978	942	748	1170
ALAD	54	52	16	26	60	50	19	26	76	94
ALAS1	268	195	74	150	342	217	203	165	299	541
ALAS2	0	0	0	0	0	0	0	0	0	0
ALB	0	0	0	0	0	0	0	0	0	0
ALCAM	2	1	2	0	5	12	22	14	13	1
ALDH16A1	0	0	0	0	0	0	0	0	0	5
ALDH18A1	17	35	9	4	38	15	46	53	47	68
ALDH1A1	34	59	16	75	7	9	0	26	8	44
ALDH1A2	20	32	16	52	75	78	22	40	78	267
ALDH1A3	0	2	0	0	5	2	0	0	0	0
ALDH1B1	24	28	29	105	61	6	29	36	59	90
ALDH1L1	0	0	0	0	0	0	0	0	0	0
ALDH1L2	7	7	1	7	21	7	15	12	0	16
ALDH2	89	62	24	52	74	75	73	105	124	138
ALDH3A1	0	0	0	0	0	0	0	0	0	0
ALDH3A2	38	53	17	63	58	30	91	143	50	37
ALDH3B1	0	0	0	0	0	0	4	2	0	0
ALDH4A1	35	46	18	57	89	48	127	105	65	108
ALDH5A1	9	11	5	13	16	8	0	4	3	22
ALDH6A1	16	15	5	69	19	15	41	38	33	13
ALDH7A1	159	136	126	245	209	175	322	294	231	320
ALDH8A1	2	2	0	0	19	14	0	2	10	7
ALDH9A1	24	18	9	16	11	27	71	13	15	8
ALDOA	100	146	61	116	160	173	51	84	71	247
ALDOB	0	0	0	0	0	0	0	0	0	7
ALDOC	30	38	13	45	19	42	46	72	26	76
ALG1	7	3	5	16	10	5	10	2	5	14
ALG10	0	3	0	9	16	2	0	7	12	11
ALG11	58	86	50	97	118	102	65	83	67	144
ALG12	7	7	0	11	8	2	5	1	1	9
ALG13	487	548	317	640	778	600	1291	1295	465	1085
ALG14	116	95	90	128	165	153	109	155	161	349
ALG2	17	9	5	6	1	1	3	25	19	10
ALG3	14	2	4	6	20	8	18	1	27	34
ALG5	0	2	3	10	0	4	2	1	1	0
ALG6	422	360	285	529	425	435	652	843	634	1039
ALG8	37	50	17	46	32	21	32	62	58	105
ALG9	18	41	21	33	68	24	37	37	42	49
ALK	0	0	0	0	2	0	1	0	2	4
ALKAL1	0	2	0	0	0	0	1	3	0	5
ALKAL2	0	0	0	0	0	0	0	0	0	0
ALKBH1	154	125	102	183	251	159	155	215	133	232
ALKBH2	92	136	62	54	91	66	83	104	159	142
ALKBH3	84	94	36	120	159	97	76	109	121	178
ALKBH4	1	0	0	0	0	0	3	8	7	3
ALKBH5	222	286	115	156	242	232	282	208	310	1286
ALKBH6	4	10	1	12	0	3	7	10	9	21
ALKBH7	30	32	21	54	51	26	57	84	51	82
ALKBH8	24	9	12	18	16	2	28	18	0	49
ALLC	9	15	6	11	20	12	34	32	14	31
ALMS1	195	230	116	174	226	154	266	201	227	303
ALOX12	35	27	7	24	36	36	46	13	25	26
ALOX12B	0	0	0	0	0	0	0	0	0	0
ALOX12E	0	0	0	0	3	0	0	0	0	0
ALOX15	0	0	0	0	0	0	0	0	0	0
ALOX15B	11	10	14	41	44	10	4	42	25	19
ALOX5	0	0	0	3	2	0	5	5	3	2
ALOX5AP	0	0	0	0	0	0	0	0	0	0
ALOXE3	1	5	0	6	6	3	11	9	4	14
ALPI	0	0	0	0	0	0	0	0	0	0
ALPK1	0	0	0	0	0	0	0	0	0	0
ALPK2	0	0	0	0	0	0	1	0	2	0
ALPK3	3	19	5	25	24	30	16	22	17	40
ALPL	6	6	8	17	27	2	10	8	7	15
ALS2	77	65	21	114	109	116	161	151	103	145
ALS2CL	0	0	0	0	0	0	0	0	0	0
ALS2CR12	0	0	0	0	0	0	0	0	0	0
ALX1	345	314	207	499	463	466	201	375	382	624
ALX3	0	1	0	10	1	0	0	0	3	4
ALX4	0	0	0	0	0	0	0	0	1	0
ALYREF	3	12	2	1	2	6	1	9	0	22
AMACR	0	0	0	5	0	0	0	1	19	11
AMBN	0	0	0	0	0	0	0	0	0	0
AMBP	0	0	0	0	0	0	1	0	0	0
AMBRA1	101	81	73	120	146	91	101	145	126	158
AMD1	1012	1073	723	1451	2022	1279	1437	1794	1372	2075
AMDHD1	421	492	73	202	547	453	261	219	534	960
AMDHD2	0	0	0	1	1	1	13	2	7	16
AMER1	2	21	19	29	53	24	48	16	36	30
AMER2	0	0	1	0	1	0	0	0	0	0
AMER3	0	0	0	0	0	0	0	0	0	0
AMFR	116	176	44	216	98	241	502	393	135	223
AMH	0	0	0	0	0	0	0	0	0	0
AMHR2	0	0	0	0	0	0	0	0	0	0
AMIGO1	113	117	26	130	174	180	224	228	93	182
AMIGO2	0	0	0	0	0	0	0	0	0	0
AMMECR1	4	4	1	17	13	3	0	23	0	4
AMMECR1L	40	34	10	55	71	49	97	109	82	38
AMN	0	0	0	0	0	0	0	0	0	0
AMN1	124	169	85	202	334	197	82	171	229	285
AMOT	149	169	78	189	179	174	305	277	183	222
AMOTL1	12	27	19	14	31	30	14	14	30	102
AMOTL2	13	7	5	5	9	4	0	13	6	5
AMPD1	0	0	0	0	0	0	0	0	0	6
AMPD2	48	33	11	16	31	33	124	118	20	23
AMPD3	134	148	94	145	174	182	304	502	154	268
AMPH	23	6	0	14	14	8	8	0	0	35
AMT	7	6	1	0	12	1	0	3	5	18
AMTN	0	0	0	0	0	0	0	0	0	0
AMY2B	0	0	0	0	0	0	0	0	0	0
AMZ1	0	0	0	0	0	0	0	0	0	0
AMZ2	123	152	40	43	114	124	115	220	245	328
ANAPC1	56	69	42	128	126	97	251	212	121	85
ANAPC10	145	124	77	100	204	113	116	140	209	296
ANAPC11	256	271	126	329	287	273	414	457	426	822
ANAPC13	69	110	46	89	103	79	87	133	129	256
ANAPC15	499	485	289	501	557	447	1026	982	823	1444
ANAPC16	120	70	26	49	64	123	109	49	168	138
ANAPC4	56	39	17	68	24	82	126	110	45	121
ANAPC5	30	42	40	35	41	44	72	84	47	87
ANAPC7	147	199	77	131	248	134	284	236	145	298
ANG	0	0	0	0	0	0	0	0	0	0
ANG2	0	0	0	0	0	0	0	0	0	0
ANGEL1	8	4	3	10	8	16	15	15	11	20
ANGEL2	416	495	248	520	714	486	874	797	561	691
ANGPT1	0	0	0	5	1	0	0	1	0	20
ANGPT2	0	0	0	0	0	2	0	0	0	0
ANGPT4	1	0	0	0	0	0	0	0	0	0
ANGPTL1	0	7	1	0	0	2	4	0	0	0
ANGPTL2	0	0	0	0	0	0	0	0	0	0
ANGPTL3	0	0	0	0	0	0	0	0	0	0
ANGPTL4	0	0	0	0	0	0	0	1	0	0
ANGPTL5	0	0	0	0	0	0	0	0	0	0
ANGPTL6	1	4	4	0	4	1	1	6	0	2
ANGPTL7	0	0	0	2	3	0	0	0	0	0
ANGPTL8	4	2	5	0	7	2	0	5	3	0
ANHX	0	0	0	0	0	0	0	0	0	0
ANK1	0	3	0	0	0	0	0	0	0	5
ANK2	90	93	67	102	148	155	195	231	205	240
ANK3	139	112	86	119	178	135	199	104	116	207
ANKAR	1	0	0	0	0	0	0	0	0	15
ANKDD1A	0	0	0	0	0	0	0	0	0	0
ANKDD1B	0	0	0	0	0	0	0	0	0	1
ANKEF1	0	0	1	0	0	0	0	0	0	3
ANKFY1	207	160	69	332	227	169	487	273	252	201
ANKH	0	1	1	0	1	7	0	2	1	0
ANKHD1	31	38	32	14	57	25	77	70	22	44
ANKIB1	76	83	27	50	91	90	76	66	43	211
ANKK1	0	0	0	0	0	0	0	0	0	0
ANKLE1	0	0	0	0	3	0	0	0	1	0
ANKLE2	18	46	15	28	39	75	55	115	59	171
ANKMY1	0	0	0	0	0	0	0	0	0	0
ANKMY2	73	88	51	119	123	74	93	140	126	278
ANKRA2	75	84	55	113	131	64	122	129	99	161
ANKRD1	0	0	0	0	0	0	5	0	0	0
ANKRD10	8	8	3	3	10	9	7	16	7	22
ANKRD11	49	30	18	43	73	31	87	56	50	119
ANKRD12	34	30	30	11	15	37	101	35	54	98
ANKRD13A	430	458	260	293	537	458	376	467	290	546
ANKRD13B	0	3	0	0	0	2	9	1	0	19
ANKRD13C	26	24	7	24	19	12	24	25	13	34
ANKRD13D	0	5	0	1	4	0	1	6	1	9
ANKRD16	19	23	2	28	22	19	9	18	24	34
ANKRD17	3819	3738	2410	5710	5809	3633	6786	6687	5135	5959
ANKRD2	0	0	0	0	0	0	0	0	0	0
ANKRD22	0	0	0	0	0	0	0	0	0	0
ANKRD23	0	0	0	0	0	0	0	0	0	0
ANKRD24	0	0	0	0	0	0	0	0	0	0
ANKRD26	12	19	8	0	4	28	40	25	11	6
ANKRD27	12	17	0	21	48	8	46	36	7	22
ANKRD28	18	53	17	38	27	83	107	67	58	113
ANKRD29	0	0	0	0	0	0	0	0	0	0
ANKRD31	54	22	35	40	35	20	73	68	35	90
ANKRD33	0	0	0	0	0	0	0	0	0	0
ANKRD33B	0	0	0	0	0	0	0	0	0	0
ANKRD34A	11	5	0	5	15	8	8	4	4	7
ANKRD34B	5	0	4	0	0	0	0	0	19	0
ANKRD34C	0	0	0	0	0	0	0	0	0	0
ANKRD35	0	0	2	0	2	0	1	4	0	0
ANKRD37	1	3	0	0	1	2	5	0	6	12
ANKRD39	42	33	9	33	18	43	42	72	50	191
ANKRD40	88	146	6	40	6	174	30	251	214	255
ANKRD42	42	51	17	41	53	35	138	124	55	67
ANKRD44	96	80	86	52	237	150	140	227	170	208
ANKRD45	8	2	0	0	2	1	0	5	14	0
ANKRD46	396	404	276	561	480	375	820	865	641	879
ANKRD49	93	51	30	97	166	127	49	102	120	307
ANKRD50	0	4	0	0	9	3	22	11	23	0
ANKRD52	7	17	4	1	7	4	5	7	5	19
ANKRD53	0	0	0	0	0	1	0	0	0	0
ANKRD54	17	26	0	0	0	21	6	31	41	45
ANKRD55	0	0	0	0	0	0	0	0	0	5
ANKRD6	45	103	29	71	92	80	97	105	64	67
ANKRD60	0	0	0	0	0	0	0	0	0	0
ANKRD61	3	0	0	0	0	0	0	0	0	0
ANKRD63	5	0	0	10	3	2	0	1	0	1
ANKRD65	0	0	0	0	0	0	0	0	0	0
ANKRD66	0	0	0	0	0	0	0	0	0	0
ANKRD9	0	2	0	0	0	4	9	0	0	3
ANKS1A	55	59	29	51	58	71	117	76	20	80
ANKS1B	117	80	15	12	173	124	92	103	100	140
ANKS3	0	11	0	2	2	14	1	2	3	1
ANKS4B	33	18	5	6	25	7	2	15	5	12
ANKS6	6	22	1	0	0	1	1	17	17	74
ANKUB1	0	0	0	0	0	0	0	0	0	0
ANKZF1	55	53	5	12	45	25	32	25	60	103
ANLN	263	263	267	591	500	356	555	594	435	595
ANO1	0	0	0	0	0	0	0	8	0	0
ANO10	54	68	34	74	77	48	85	173	79	197
ANO2	5	3	0	0	0	0	4	2	3	3
ANO3	8	3	0	2	6	12	0	0	0	0
ANO4	131	160	87	107	231	137	179	253	227	266
ANO5	32	15	7	17	8	31	49	24	0	6
ANO6	18	31	61	122	43	11	159	202	30	95
ANO7	0	0	0	0	0	0	0	0	0	0
ANO8	0	0	0	0	0	0	0	0	0	0
ANO9	2	3	3	0	0	0	0	1	10	0
ANOS1	0	0	0	0	0	0	10	2	0	7
ANP32A	17	10	4	19	24	5	12	34	25	57
ANP32B	340	321	143	297	377	319	420	452	582	1059
ANP32E	595	548	294	477	616	556	917	1032	795	1466
ANPEP	0	1	0	2	0	0	0	4	0	0
ANTXR1	0	0	0	0	0	0	0	0	0	0
ANTXR2	1	3	0	0	42	15	9	19	69	130
ANTXRL	0	0	0	0	0	0	0	0	0	0
ANXA1	0	0	0	0	0	0	0	3	11	0
ANXA10	0	0	0	0	0	0	0	0	0	0
ANXA11	51	68	25	57	96	98	38	35	102	128
ANXA13	0	0	0	0	0	0	0	0	0	0
ANXA2	5	13	22	16	31	28	21	25	2	28
ANXA3	4	3	6	0	10	0	0	6	1	25
ANXA4	12	8	3	7	13	5	15	35	7	29
ANXA5	105	143	40	152	95	93	91	161	130	270
ANXA6	0	7	10	0	3	0	5	3	12	0
ANXA7	200	179	99	159	401	212	216	226	373	429
ANXA8L1	0	0	0	0	0	0	0	0	0	0
ANXA9	0	0	0	0	0	3	0	0	0	0
AOAH	0	0	1	0	0	1	0	2	5	4
AOC1	0	0	0	0	0	0	0	0	0	0
AOC2	12	7	0	9	11	8	7	14	6	7
AOC3	0	0	0	0	0	0	0	0	0	0
AOX1	0	2	0	0	0	0	0	1	0	8
AOX2	0	0	0	0	0	0	0	0	1	0
AOX4	0	0	0	0	0	0	0	0	0	0
AP1AR	118	146	49	177	207	188	194	187	222	278
AP1B1	59	87	17	46	105	77	75	120	54	111
AP1G1	31	62	20	74	76	38	115	101	23	133
AP1G2	66	29	27	42	27	32	28	38	80	76
AP1M1	64	51	30	33	197	82	26	73	84	201
AP1M2	169	128	70	173	176	141	202	228	224	428
AP1S1	33	33	30	24	38	39	39	61	49	87
AP1S2	12	54	1	1	10	78	4	3	6	253
AP1S3	1	0	3	0	0	0	0	0	0	0
AP2A1	6	15	5	16	12	6	17	8	10	10
AP2A2	22	16	4	27	64	47	68	48	41	91
AP2B1	257	271	94	232	389	305	180	217	264	383
AP2M1	398	306	246	441	621	380	778	849	584	982
AP2S1	8	7	7	14	11	16	14	20	15	37
AP3B1	271	306	110	236	394	278	421	571	319	440
AP3B2	155	171	58	122	229	94	172	174	179	159
AP3D1	12	58	18	61	56	41	122	73	66	49
AP3M1	556	442	280	546	625	449	622	833	604	914
AP3M2	227	153	117	232	196	195	369	318	312	216
AP3S1	166	224	150	240	244	270	328	338	298	534
AP3S2	144	152	71	172	301	196	176	201	164	285
AP4B1	20	28	28	45	26	15	34	50	40	52
AP4E1	139	188	73	72	81	137	159	169	123	299
AP4M1	5	6	1	10	5	4	11	10	1	0
AP4S1	0	2	0	0	0	0	0	0	6	3
AP5B1	4	0	0	0	0	0	0	0	0	0
AP5M1	78	109	28	105	108	101	114	132	54	230
AP5S1	4	11	13	5	40	15	35	44	23	38
AP5Z1	0	0	0	7	0	0	0	0	0	0
APAF1	180	92	197	362	173	114	713	592	206	364
APBA1	9	63	6	22	48	94	30	57	30	148
APBA2	0	0	0	0	0	0	0	0	0	0
APBA3	5	11	13	5	8	14	7	14	21	62
APBB1	0	1	0	0	0	0	0	0	0	6
APBB1IP	8	20	3	0	0	9	4	16	26	37
APBB2	391	337	166	515	614	397	529	463	463	631
APBB3	1	0	1	0	0	0	0	3	0	0
APC	24	20	6	17	31	45	71	93	42	25
APC2	8	4	6	1	8	1	0	15	1	3
APCDD1	0	0	0	0	0	0	2	0	0	0
APCDD1L	4	2	0	1	4	0	0	0	7	0
APCS	0	0	0	0	0	0	0	0	0	0
APEG3	0	0	0	0	0	0	0	0	0	0
APEH	36	13	6	32	59	6	34	38	22	80
APELA	0	0	0	0	0	0	0	0	0	0
APEX1	47	90	61	133	129	65	93	75	75	198
APEX2	48	36	7	6	46	18	70	43	28	60
APH1A	6	1	1	2	5	11	7	3	8	22
APH1B	243	218	133	263	352	210	627	595	432	497
API5	788	782	572	953	905	838	1968	1757	915	1441
APIP	148	118	113	197	176	127	434	410	171	328
APLF	42	83	48	108	115	82	98	128	59	140
APLN	0	0	0	0	0	4	0	0	0	0
APLNR	0	0	0	0	0	0	0	0	0	0
APLP1	13	18	13	22	20	12	8	21	74	27
APLP2	167	189	71	254	219	144	351	324	238	425
APMAP	15	6	6	12	18	11	6	9	18	20
APOA1	0	0	0	0	0	0	0	0	0	0
APOA2	0	0	0	0	0	0	0	0	0	0
APOA4	0	0	0	0	0	0	0	0	0	1
APOA5	0	0	0	0	0	0	0	0	0	0
APOB	45	13	17	0	14	6	0	23	7	42
APOBEC1	0	0	0	0	0	0	0	0	0	0
APOBEC2	15	10	9	22	19	4	12	4	22	26
APOBEC3H	2	0	3	4	0	2	0	9	0	0
APOBEC3Z1	0	0	0	0	0	0	0	0	0	0
APOBEC3Z2	0	0	0	0	0	0	0	0	0	0
APOBEC4	0	0	0	0	0	0	0	0	3	0
APOBR	0	0	0	0	0	0	0	2	0	0
APOC2	0	0	0	0	0	0	0	0	0	0
APOC3	0	0	0	0	0	0	0	0	0	0
APOC4	0	0	0	0	0	0	0	0	0	0
APOD	0	5	0	8	5	0	1	0	13	3
APOE	0	0	0	0	0	0	0	0	0	0
APOF	0	0	0	0	0	0	0	0	0	0
APOH	0	0	0	0	0	0	0	0	0	0
APOL3	0	0	0	0	0	2	0	0	0	0
APOLD1	13	11	0	0	2	0	0	26	0	18
APOM	0	1	0	0	0	2	0	1	0	0
APOO	137	103	79	80	118	112	87	121	163	339
APOOL	0	0	0	0	0	0	0	0	0	0
APOPT1	16	31	13	23	32	10	6	36	41	33
APP	16	27	6	10	52	35	11	3	18	62
APPBP2	66	75	9	91	10	80	123	175	110	182
APPL1	174	133	70	167	242	162	219	143	293	243
APPL2	243	192	89	155	169	169	298	342	256	220
APRT	0	1	0	0	0	0	0	0	0	0
APTX	10	16	23	34	18	27	52	26	26	28
AQP1	0	0	0	0	0	0	0	0	0	0
AQP10	0	0	0	0	0	0	0	0	0	0
AQP11	23	18	0	5	88	23	24	23	42	54
AQP12B	0	0	0	0	0	0	0	0	0	0
AQP2	0	0	0	0	0	0	0	0	0	0
AQP3	8	19	0	0	30	2	12	15	18	29
AQP4	0	0	0	6	3	4	31	2	0	10
AQP5	0	0	0	0	0	0	0	0	0	0
AQP6	11	5	13	20	49	11	35	16	35	29
AQP7	0	0	0	0	0	0	0	0	0	4
AQP8	0	0	0	0	0	0	0	0	0	0
AQP9	0	0	0	0	0	1	0	0	0	0
AQR	3	41	25	48	33	98	65	71	14	110
AR	0	0	0	0	0	0	0	0	0	0
ARAF	27	17	5	32	5	26	32	31	56	13
ARAP1	1	13	4	7	5	11	11	7	10	8
ARAP2	211	173	74	128	217	209	240	294	266	486
ARAP3	27	58	26	30	66	47	25	47	27	33
ARC	0	0	0	4	0	0	9	0	0	1
ARCN1	365	273	243	443	324	166	828	1025	567	701
AREG	0	0	0	0	0	0	0	0	0	0
AREL1	72	46	14	55	55	56	61	69	43	99
ARF1	1180	1089	847	1914	1901	1392	2113	2325	1822	2693
ARF2	77	60	27	142	86	75	141	72	117	159
ARF3	254	214	78	258	304	173	303	333	232	258
ARF4	1559	1715	1493	3015	1832	1510	4943	5414	1656	2710
ARF5	341	297	163	306	224	303	707	802	546	965
ARF6	85	593	31	48	57	588	84	90	92	642
ARFGAP1	52	53	23	66	105	72	82	56	63	114
ARFGAP2	63	79	38	110	171	111	81	75	123	216
ARFGAP3	0	6	11	17	23	0	3	8	35	0
ARFGEF1	63	95	22	58	92	59	127	98	28	235
ARFGEF2	128	147	65	66	96	141	159	237	194	347
ARFGEF3	85	103	15	78	25	82	60	151	116	160
ARFIP1	360	333	257	487	478	374	656	853	418	1028
ARFIP2	33	19	28	40	28	14	43	61	17	88
ARFRP1	4	18	0	7	1	12	7	8	25	23
ARG1	0	0	0	0	0	0	0	0	0	0
ARG2	110	104	56	107	240	74	250	261	235	306
ARGFX	0	0	0	0	0	0	0	2	0	0
ARGLU1	73	127	57	118	178	133	182	200	146	256
ARHGAP1	5	11	2	5	8	4	14	2	6	14
ARHGAP10	114	140	19	94	73	167	199	225	138	266
ARHGAP11A	242	260	171	248	273	242	491	391	289	332
ARHGAP12	674	699	138	591	267	666	810	839	726	1035
ARHGAP15	0	0	0	0	0	4	0	0	0	0
ARHGAP17	41	47	3	32	29	38	44	112	44	41
ARHGAP18	265	428	217	354	540	319	871	781	376	588
ARHGAP19	103	113	71	176	140	101	157	281	105	109
ARHGAP20	6	7	1	1	0	32	0	12	2	45
ARHGAP21	24	49	3	26	38	30	2	12	73	69
ARHGAP22	41	71	20	85	58	96	37	34	49	133
ARHGAP23	2	0	0	0	0	0	0	2	0	0
ARHGAP24	9	34	7	35	37	20	36	81	55	47
ARHGAP25	1089	968	482	1025	1684	1175	1089	1445	1312	1971
ARHGAP26	20	72	19	14	21	71	21	56	27	62
ARHGAP27	0	4	2	14	4	6	0	3	10	17
ARHGAP28	0	0	0	0	0	0	0	3	0	0
ARHGAP29	343	551	107	271	284	577	424	864	661	1546
ARHGAP30	0	2	0	0	0	0	0	0	0	0
ARHGAP31	0	6	5	4	5	8	0	22	24	1
ARHGAP32	53	58	31	20	29	46	54	72	52	69
ARHGAP33	0	0	1	11	0	0	0	0	0	0
ARHGAP35	89	118	39	52	54	54	112	207	106	152
ARHGAP36	0	0	0	0	0	0	0	0	0	0
ARHGAP39	1	6	0	9	2	1	2	1	1	1
ARHGAP4	0	3	0	0	2	2	21	4	0	6
ARHGAP40	0	0	0	0	0	0	0	0	0	0
ARHGAP42	87	66	107	174	166	143	162	128	152	312
ARHGAP44	8	19	11	9	8	12	9	13	14	51
ARHGAP45	0	0	0	0	0	0	0	0	0	0
ARHGAP5	255	212	83	294	205	302	409	463	324	601
ARHGAP6	0	0	0	0	0	0	0	0	0	0
ARHGAP8	7	5	1	7	13	0	5	8	7	4
ARHGAP9	0	0	0	0	0	0	6	0	0	0
ARHGDIA	19	15	17	14	29	29	20	21	22	61
ARHGDIB	0	0	0	0	6	0	8	0	0	0
ARHGDIG	1	0	0	0	1	1	0	0	0	0
ARHGEF1	2	18	6	21	23	17	28	38	7	2
ARHGEF10	6	1	7	21	8	3	49	10	0	19
ARHGEF10L	1	1	3	0	0	3	2	6	1	11
ARHGEF11	32	14	17	19	32	16	44	75	66	37
ARHGEF12	36	118	30	67	134	146	90	126	62	315
ARHGEF15	0	0	0	0	2	0	0	0	0	0
ARHGEF16	36	18	15	83	43	28	41	46	35	36
ARHGEF17	0	0	1	0	0	0	1	0	0	4
ARHGEF18	29	25	10	41	53	33	45	34	36	79
ARHGEF19	0	0	0	0	2	0	0	0	0	0
ARHGEF2	7	7	0	21	7	14	21	8	11	6
ARHGEF25	0	0	0	7	5	2	4	6	1	1
ARHGEF26	324	354	230	491	529	328	664	585	424	524
ARHGEF28	316	269	105	338	243	258	588	630	387	443
ARHGEF3	341	215	172	366	425	329	356	442	464	602
ARHGEF33	4	7	3	4	18	14	9	11	26	65
ARHGEF37	23	23	8	15	28	19	62	49	32	51
ARHGEF38	61	27	7	64	59	41	43	50	59	108
ARHGEF39	48	34	29	21	54	52	29	35	52	80
ARHGEF4	10	2	11	1	2	7	2	3	28	13
ARHGEF40	14	15	0	9	4	0	0	4	1	4
ARHGEF5	2	12	0	0	0	5	0	4	5	25
ARHGEF6	0	6	0	0	0	0	0	4	0	0
ARHGEF7	12	17	7	0	16	5	11	13	19	16
ARHGEF9	1	3	4	0	0	4	0	0	0	1
ARID1A	125	186	70	185	196	166	148	166	116	663
ARID1B	89	52	26	13	39	61	59	33	77	55
ARID2	91	102	41	67	208	152	197	146	71	231
ARID3A	0	1	0	0	0	0	0	0	0	0
ARID3B	86	119	32	68	112	91	66	114	132	128
ARID3C	0	2	0	3	0	0	6	0	0	0
ARID4A	231	388	296	447	421	461	830	796	543	885
ARID4B	45	37	27	40	49	46	26	39	60	125
ARID5A	27	27	13	56	52	42	35	52	19	41
ARID5B	255	203	112	264	380	322	462	542	406	755
ARIH1	99	257	44	87	98	186	115	98	120	252
ARIH2	151	138	48	168	53	118	187	151	225	286
ARIH2OS	0	0	0	0	0	1	0	3	9	0
ARL1	371	396	198	402	400	273	734	525	439	637
ARL10	46	72	18	72	61	51	57	85	89	22
ARL11	0	0	0	0	0	0	0	0	0	3
ARL13A	84	63	65	51	87	43	25	57	110	198
ARL13B	220	216	108	235	238	133	425	427	268	360
ARL14	0	0	2	0	0	0	5	0	16	0
ARL14EP	299	255	211	325	441	404	342	362	407	677
ARL14EPL	5	11	3	0	10	15	1	0	0	10
ARL15	346	324	195	367	387	350	509	434	304	485
ARL16	2	0	5	7	3	0	0	14	4	15
ARL2	4	5	3	5	5	3	1	6	3	12
ARL2BP	368	350	200	268	573	376	623	675	461	487
ARL3	8	1	5	11	2	1	3	12	0	18
ARL4A	658	553	200	357	481	462	582	738	804	1213
ARL4C	0	0	0	0	0	2	0	0	2	0
ARL4D	2	9	34	168	8	8	74	70	58	108
ARL5A	339	274	87	407	167	255	556	655	379	622
ARL5B	54	53	31	129	66	37	113	116	163	83
ARL5C	0	0	0	0	0	0	0	0	0	0
ARL6	766	868	590	1119	1419	1027	1085	1196	1419	1355
ARL6IP1	1578	1391	696	1105	2016	1474	1224	1579	1774	2824
ARL6IP4	6	11	4	7	26	8	0	7	13	47
ARL6IP5	9	5	6	16	6	15	9	2	36	25
ARL6IP6	142	159	149	276	189	231	261	280	182	224
ARL8A	0	0	0	0	0	0	0	0	0	0
ARL8B	145	180	1	18	7	134	23	144	185	192
ARL9	0	1	0	0	0	0	0	0	6	8
ARMC1	634	619	408	713	958	734	1158	1550	1195	1123
ARMC10	1250	1294	608	1376	1479	1352	2302	2196	1613	2043
ARMC12	10	10	0	5	34	12	0	2	11	14
ARMC2	297	342	192	340	422	334	301	431	384	828
ARMC3	0	0	0	0	0	0	0	0	0	0
ARMC4	0	0	0	5	10	0	0	0	0	0
ARMC5	0	0	0	0	0	0	1	0	3	1
ARMC6	0	0	0	0	6	2	0	0	0	0
ARMC7	140	118	68	172	297	200	239	182	195	262
ARMC8	49	51	26	22	45	31	56	52	21	85
ARMC9	0	2	0	6	2	2	0	6	6	1
ARMCX1	0	0	0	0	0	0	0	0	0	0
ARMCX2	0	0	0	0	0	0	0	0	0	0
ARMCX3	0	0	1	0	0	0	0	0	0	1
ARMCX4	0	0	0	0	0	0	0	0	0	0
ARMCX5	4	7	7	9	0	16	12	8	0	22
ARMCX6	0	0	0	0	0	0	0	0	0	0
ARMH1	22	16	20	23	17	30	28	22	50	98
ARMH2	0	0	0	0	0	0	0	0	0	0
ARMH3	184	154	69	129	302	139	324	301	246	185
ARMH4	206	169	83	142	301	191	38	185	274	400
ARMT1	0	0	0	0	0	0	0	0	0	11
ARNT	8	3	1	12	2	9	0	6	16	4
ARNT2	9	3	2	7	11	13	0	1	7	5
ARNTL	358	397	243	483	635	424	954	893	427	730
ARNTL2	0	0	0	0	0	0	0	0	0	0
ARPC1A	189	172	79	127	193	173	169	216	217	438
ARPC1B	78	91	51	66	128	85	99	116	155	164
ARPC2	1073	1042	465	1056	1251	1157	1080	1359	1686	2217
ARPC3	2	2	0	2	10	2	11	5	6	10
ARPC4	143	134	90	140	149	103	203	193	180	281
ARPC5	70	82	38	34	98	109	12	38	196	182
ARPC5L	100	128	62	72	157	110	198	162	215	359
ARPIN	95	74	67	51	175	98	123	172	153	305
ARPP19	527	474	243	297	959	589	570	780	720	1347
ARPP21	195	111	111	185	143	129	248	455	192	294
ARR3	0	0	0	0	0	0	0	0	0	0
ARRB1	5	18	1	24	4	4	13	3	10	20
ARRB2	0	2	0	9	0	0	0	2	0	4
ARRDC1	144	147	34	146	75	97	170	150	144	270
ARRDC2	218	197	80	195	407	255	336	282	312	259
ARRDC3	84	134	49	127	238	106	138	202	129	243
ARRDC4	4	2	2	0	5	2	0	0	12	32
ARRDC5	0	0	0	0	0	0	0	0	0	0
ARSA	7	6	1	0	7	0	1	9	1	0
ARSB	13	25	25	44	5	35	61	170	47	46
ARSE	0	0	0	0	0	0	0	0	0	0
ARSG	0	2	0	1	0	4	0	2	0	7
ARSH	0	0	0	0	0	0	3	0	0	0
ARSI	0	0	0	0	1	0	0	0	0	0
ARSJ	0	0	0	0	0	0	0	0	13	0
ARSK	0	0	0	0	0	0	1	0	0	0
ART1	0	0	0	0	0	0	0	0	0	0
ART3	30	24	37	42	54	42	70	75	42	90
ART4	0	0	0	0	0	0	0	0	0	0
ARTN	0	0	0	0	0	0	0	0	2	1
ARV1	2	2	2	7	4	7	4	1	14	3
ARVCF	0	0	0	3	0	0	0	0	6	5
ARX	0	0	0	0	0	0	0	0	0	0
AS3MT	24	18	21	12	17	33	21	15	88	119
ASAH1	117	92	67	98	107	144	77	136	171	239
ASAH2	40	28	12	58	29	9	10	53	70	81
ASAP1	73	50	42	77	147	91	94	150	83	187
ASAP2	6	6	13	24	27	15	12	32	11	51
ASAP3	4	9	7	4	10	16	10	24	21	28
ASB1	8	4	2	2	0	8	6	8	6	11
ASB10	0	0	0	0	0	0	0	0	0	0
ASB11	400	413	237	413	412	352	759	756	557	930
ASB12	2	2	0	0	4	2	6	0	13	1
ASB13	0	0	0	0	0	0	0	0	0	0
ASB14	0	0	0	0	0	0	5	0	0	0
ASB15	0	0	0	0	0	0	0	0	0	0
ASB16	3	11	0	0	0	22	0	1	19	36
ASB17	0	0	0	0	0	0	0	0	0	0
ASB18	0	0	0	0	0	0	0	0	0	0
ASB2	0	0	0	0	0	0	0	0	0	0
ASB3	472	396	262	398	642	392	644	672	285	382
ASB4	0	0	0	0	0	0	6	0	0	0
ASB5	0	0	0	0	0	0	0	0	0	0
ASB6	43	46	37	74	58	43	45	90	54	49
ASB7	16	18	4	5	5	15	11	3	0	43
ASB8	213	128	65	187	264	190	173	255	295	418
ASB9	0	0	2	0	0	0	0	2	4	21
ASCC1	268	234	102	161	299	248	207	374	393	558
ASCC2	21	24	6	26	33	27	15	13	35	22
ASCC3	128	84	42	128	142	96	198	155	151	241
ASCL1	0	0	0	0	0	0	0	0	0	0
ASCL2	0	0	0	0	0	1	2	0	0	2
ASCL3	0	0	0	0	0	0	0	0	0	0
ASCL4	0	0	0	0	0	1	0	6	0	0
ASCL5	0	0	0	0	0	0	0	0	0	0
ASF1A	409	442	212	437	737	573	344	444	660	797
ASF1B	1721	1750	880	1953	2333	1586	2960	3205	2416	3712
ASGR1	3	0	4	16	8	1	0	7	3	2
ASGR2	0	0	0	5	0	0	0	0	0	0
ASH1L	57	37	21	45	66	53	148	102	38	108
ASH2L	680	786	431	820	800	652	1576	1385	602	925
ASIC1	17	23	10	22	18	20	26	12	7	53
ASIC2	0	0	0	0	0	0	0	0	0	0
ASIC3	0	0	0	0	0	0	0	0	0	0
ASIC4	0	0	0	0	0	0	0	0	0	2
ASIC5	0	0	0	0	0	0	0	0	0	0
ASIP	0	1	0	0	1	3	0	0	0	0
ASL	0	0	3	1	0	0	0	3	1	12
ASMT	0	0	0	5	0	9	0	4	8	0
ASMTL	1	1	0	0	0	2	3	1	1	7
ASNA1	20	17	13	12	21	30	24	42	41	68
ASNS	26	31	40	40	31	27	32	46	47	122
ASNSD1	213	155	78	146	263	182	39	83	290	443
ASPA	0	0	0	0	0	0	0	0	0	0
ASPDH	0	3	0	0	0	0	0	0	7	2
ASPG	0	0	0	0	0	0	0	0	0	0
ASPH	0	4	1	11	0	8	0	3	2	3
ASPHD1	2	1	1	2	1	4	6	3	4	3
ASPHD2	3	4	1	9	0	15	4	0	14	10
ASPM	348	360	227	371	673	482	870	1048	478	787
ASPN	0	0	0	0	1	0	0	0	0	0
ASPRV1	1	8	0	5	0	4	0	6	8	0
ASPSCR1	16	9	20	20	44	17	7	28	28	41
ASRGL1	116	122	43	146	217	128	234	171	277	266
ASS1	0	0	4	0	1	1	3	0	0	1
ASTE1	21	29	9	39	28	15	0	56	17	52
ASTL	286	322	142	323	529	309	355	360	535	804
ASTN1	0	0	1	0	0	0	1	0	0	0
ASTN2	21	33	15	11	16	11	13	13	15	24
ASXL1	0	0	1	0	0	0	0	13	2	11
ASXL2	360	317	139	531	565	494	702	561	523	515
ASXL3	0	2	3	0	16	15	0	2	11	6
ASZ1	27	33	33	42	110	121	63	154	70	84
ATAD1	673	656	562	962	1367	806	1104	1300	1099	1122
ATAD2	43	29	29	53	31	20	102	81	38	52
ATAD2B	8	16	7	43	34	38	48	99	9	22
ATAD3A	0	0	0	0	0	0	0	0	0	0
ATAD5	202	229	170	437	317	213	454	588	235	321
ATAT1	17	24	9	18	11	18	16	36	25	40
ATCAY	41	44	2	14	15	17	1	4	14	2
ATE1	44	58	38	48	41	40	107	119	28	29
ATF1	152	64	55	82	81	119	110	169	173	171
ATF2	1716	1685	989	1914	2547	1871	2746	3125	1908	3214
ATF3	29	28	8	30	32	29	31	22	13	80
ATF4	230	239	195	308	294	236	374	372	316	563
ATF5	0	0	0	0	0	0	0	0	0	0
ATF6	167	217	78	171	276	238	434	326	218	410
ATF6B	38	51	20	67	62	56	71	100	43	71
ATF7	200	196	85	187	341	228	302	245	270	308
ATF7IP	82	38	33	53	65	68	51	100	41	106
ATF7IP2	37	27	24	44	67	98	123	73	71	134
ATG10	5	1	1	6	6	0	14	4	3	9
ATG101	93	85	44	74	75	73	88	118	96	186
ATG12	78	66	75	71	157	130	132	251	135	266
ATG13	55	54	51	131	109	64	135	185	87	90
ATG14	236	215	117	275	271	203	352	648	381	359
ATG16L1	43	41	15	19	54	52	70	59	36	52
ATG16L2	30	13	2	26	11	10	5	6	6	40
ATG2A	6	21	3	13	25	6	4	5	2	32
ATG2B	14	26	6	29	36	35	39	48	14	121
ATG3	230	248	4	107	5	238	124	319	245	330
ATG4A	16	16	8	14	36	10	22	30	10	62
ATG4B	14	9	0	4	4	15	5	18	19	25
ATG4C	19	6	0	27	8	4	29	11	11	15
ATG4D	18	55	1	1	5	27	4	11	9	52
ATG5	657	588	260	709	895	711	849	767	665	694
ATG7	54	54	25	107	89	98	72	111	68	81
ATG9A	33	20	26	29	53	45	38	26	40	29
ATG9B	2	0	0	0	2	0	3	3	1	0
ATIC	148	134	57	112	151	169	136	219	115	263
ATL1	11	24	0	3	29	47	20	55	11	91
ATL2	817	992	588	1017	1320	1066	1824	1926	1326	1590
ATL3	274	215	211	497	417	327	545	609	384	397
ATM	54	14	20	35	32	56	131	120	35	107
ATMIN	24	55	6	25	49	92	10	27	28	113
ATN1	4	1	1	10	5	6	2	9	7	5
ATOH1	0	0	0	0	0	0	0	4	0	2
ATOH7	8	68	13	8	10	69	0	7	4	44
ATOH8	0	0	0	0	0	0	0	0	0	0
ATOX1	0	6	4	7	2	5	4	4	14	17
ATP10A	31	26	0	40	1	14	47	34	1	66
ATP10B	4	22	19	10	16	18	6	8	15	19
ATP10D	337	326	230	368	504	375	576	549	404	836
ATP11A	119	168	83	319	280	207	370	342	89	234
ATP11B	384	394	162	500	236	407	743	706	462	572
ATP11C	142	112	68	173	228	135	217	229	140	294
ATP12A	11	24	6	40	22	18	19	23	48	91
ATP13A1	18	10	15	13	15	18	37	37	43	32
ATP13A2	0	3	0	0	0	1	0	0	0	1
ATP13A3	4	21	11	24	13	7	29	41	0	51
ATP13A4	0	0	0	0	0	0	0	0	0	0
ATP13A5	14	10	8	5	16	13	5	26	13	12
ATP1A1	562	538	463	720	1001	740	711	1114	667	933
ATP1A2	0	0	0	0	0	0	0	0	0	0
ATP1A3	2	0	2	8	0	6	1	4	6	5
ATP1A4	0	0	0	0	0	0	0	0	0	0
ATP1B1	5	14	8	16	15	17	11	11	8	47
ATP1B2	0	0	0	0	0	0	1	0	0	0
ATP1B3	21	36	12	48	19	53	15	42	27	99
ATP1B4	0	0	0	0	0	0	0	0	0	0
ATP23	0	0	4	0	0	0	0	4	0	0
ATP2A1	0	0	0	0	0	0	0	0	0	11
ATP2A2	289	386	232	396	370	446	368	472	267	757
ATP2A3	0	0	0	0	0	0	0	0	0	0
ATP2B1	153	219	78	244	232	203	316	272	249	527
ATP2B2	0	0	0	0	0	0	0	0	0	0
ATP2B3	0	0	0	0	0	0	0	0	0	0
ATP2B4	19	35	38	57	75	35	69	46	41	79
ATP2C1	145	126	30	56	54	87	70	138	76	260
ATP2C2	28	40	6	24	15	23	60	42	86	144
ATP4A	0	0	0	6	0	0	0	0	0	0
ATP4B	0	0	0	0	0	0	0	0	0	0
ATP5F1A	709	608	352	573	851	690	1197	1451	696	1319
ATP5F1B	117	158	92	147	202	200	520	483	290	467
ATP5F1C	399	392	179	402	590	466	419	561	761	1575
ATP5F1D	9	18	14	15	24	9	39	17	26	85
ATP5F1E	2	3	4	1	6	4	13	9	4	29
ATP5IF1	22	31	27	26	65	41	48	46	54	120
ATP5MC1	14	24	20	23	33	20	43	46	47	136
ATP5MC2	16	20	4	10	23	16	25	15	14	62
ATP5MC3	73	114	79	128	162	124	161	182	140	387
ATP5MD	6	11	17	22	11	12	21	18	19	42
ATP5ME	1	3	3	4	8	3	4	3	3	11
ATP5MF	10	7	10	9	7	8	5	4	8	20
ATP5MG	36	47	12	34	40	30	54	68	60	143
ATP5MPL	2	0	4	3	1	1	1	2	1	9
ATP5PB	279	290	135	267	401	283	356	450	395	678
ATP5PD	0	8	15	14	26	16	19	14	13	25
ATP5PF	336	349	226	290	419	358	428	517	451	1024
ATP5PO	17	25	24	14	38	55	57	58	30	105
ATP5S	57	42	30	60	107	46	60	43	81	68
ATP6AP1	44	47	7	47	36	50	35	25	38	12
ATP6AP1L	0	1	0	2	0	0	0	0	3	8
ATP6AP2	138	186	177	323	391	281	388	580	268	508
ATP6V0A1	197	195	82	152	333	188	317	292	239	191
ATP6V0A2	66	87	18	34	4	114	72	284	154	97
ATP6V0A4	14	18	9	29	24	29	4	9	12	71
ATP6V0B	41	40	28	29	31	40	82	58	82	125
ATP6V0C	47	60	52	76	70	42	47	70	68	174
ATP6V0D1	66	65	66	128	124	119	151	151	147	252
ATP6V0D2	0	0	0	0	0	0	0	0	0	0
ATP6V0E1	103	124	60	110	163	109	109	110	138	417
ATP6V0E2	1	0	2	0	0	6	0	11	0	0
ATP6V1A	52	56	55	68	53	17	126	162	87	153
ATP6V1B1	19	31	24	74	53	25	67	39	45	41
ATP6V1B2	1239	1140	515	1117	1544	1082	1473	1776	1824	1944
ATP6V1C1	731	713	345	631	932	749	1345	1484	1198	1623
ATP6V1C2	5	6	6	13	2	3	6	6	14	38
ATP6V1D	7	15	6	0	20	14	9	23	16	34
ATP6V1E1	128	101	29	49	144	126	49	90	189	381
ATP6V1E2	0	0	0	0	0	0	0	0	2	0
ATP6V1F	17	9	7	24	15	20	42	46	25	24
ATP6V1FNB	1	1	0	0	4	2	1	0	0	1
ATP6V1G1	305	317	244	304	394	309	465	628	504	914
ATP6V1G2	0	0	0	0	0	0	4	0	0	0
ATP6V1G3	0	0	0	0	0	0	0	0	0	0
ATP6V1H	140	209	72	149	208	146	194	327	178	270
ATP7A	33	21	5	73	37	30	18	39	9	66
ATP7B	13	11	0	20	30	17	3	22	12	32
ATP8A1	39	51	26	37	52	35	86	96	44	55
ATP8A2	0	0	0	0	0	0	0	1	0	0
ATP8B1	52	38	42	61	86	66	82	55	75	134
ATP8B2	5	3	1	0	1	31	10	12	4	28
ATP8B3	0	0	0	0	0	0	0	0	0	11
ATP8B4	32	28	10	14	70	46	57	35	99	125
ATP9A	57	57	27	54	53	28	79	73	50	72
ATP9B	17	22	11	24	59	38	7	15	22	50
ATPAF1	42	111	7	10	45	181	29	43	24	208
ATPAF2	22	21	20	51	33	37	31	39	55	67
ATR	16	17	8	30	8	13	9	66	0	31
ATRAID	81	53	81	181	95	58	260	292	108	259
ATRIP	43	49	23	4	45	39	11	13	37	49
ATRN	15	12	2	18	7	31	76	50	55	105
ATRNL1	5	0	5	14	12	4	0	10	0	17
ATRX	406	334	335	853	476	310	1063	1048	320	730
ATXN1	59	96	14	33	12	103	34	89	63	104
ATXN10	21	134	0	2	3	106	9	48	20	146
ATXN1L	53	74	36	69	78	39	99	77	46	126
ATXN2	71	123	38	92	133	163	102	159	33	218
ATXN2L	111	110	32	200	45	88	208	197	53	222
ATXN3	151	129	113	164	135	145	261	338	55	291
ATXN7	55	67	29	76	37	77	80	93	75	82
ATXN7L1	919	819	511	987	1255	650	964	1176	884	1019
ATXN7L2	122	152	50.25	61	127.05	149.66	91.16	104.46	129.07	186
ATXN7L3	0	0	0	0	0	1	0	0	3	0
ATXN7L3B	98	59	63	93	194	84	175	146	281	339
AUH	9	39	12	19	47	26	31	52	46	62
AUNIP	156	238	113	202	331	209	169	234	230	414
AUP1	0	3	2	8	0	5	4	0	4	0
AURKA	17173	16306	8333	16841	24106	19023	17217	21672	26497	36714
AURKAIP1	11	9	5	6	12	7	16	14	4	23
AURKB	270	364	133	320	314	364	358	246	275	480
AURKC	1028	1026	518	896	1378	1118	1474	1875	1918	3338
AUTS2	1	14	1	0	1	11	4	11	10	35
AVEN	86	72	33	60	121	117	107	103	185	269
AVIL	0	0	0	0	4	9	12	0	0	0
AVL9	161	149	53	154	198	88	242	324	190	276
AVP	0	0	0	0	0	0	0	0	0	0
AVPI1	4	7	6	21	11	8	5	17	23	22
AVPR1A	0	0	0	0	0	0	0	13	0	0
AVPR1B	4	2	1	1	5	4	0	0	11	7
AVPR2	0	0	0	0	0	0	0	0	0	0
AWAT1	0	0	0	0	0	0	0	0	0	0
AWAT2	0	0	0	0	0	0	0	0	0	0
AXDND1	78	70	49	119	72	77	166	115	82	125
AXIN1	14	35	3	14	3	30	48	35	37	67
AXIN2	31	23	4	16	7	18	3	24	19	29
AXL	0	0	0	0	0	0	0	0	0	1
AZGP1	0	0	0	0	4	0	0	6	6	3
AZI2	151	138	16	109	92	112	210	213	231	352
AZIN1	437	360	148	311	514	299	519	453	457	655
AZIN2	64	97	33	71	63	63	105	81	113	118
AZU1	2	2	1	4	3	5	6	6	4	6
ApoN	0	0	0	0	0	0	0	0	0	0
B2M	39	49	31	26	82	68	140	149	157	249
B3GALNT1	7	3	1	0	1	6	10	0	7	0
B3GALNT2	357	453	184	274	235	311	421	602	616	802
B3GALT1	6	25	2	26	29	21	14	16	23	9
B3GALT2	0	0	0	0	0	0	0	0	0	0
B3GALT4	7	0	0	0	0	0	0	1	1	0
B3GALT5	0	0	0	0	0	0	0	0	0	0
B3GALT6	2	10	2	0	2	7	5	12	7	27
B3GAT1	0	0	0	0	0	0	0	0	0	0
B3GAT2	0	0	0	0	0	0	0	0	1	0
B3GAT3	0	0	0	0	1	0	4	6	0	2
B3GNT2	4	32	1	23	0	19	23	31	3	24
B3GNT3	113	126	69	178	243	138	224	130	245	330
B3GNT4	16	10	17	52	37	15	53	49	58	63
B3GNT5	0	5	0	0	2	0	0	10	1	32
B3GNT6	0	0	0	0	0	1	0	0	0	0
B3GNT7	0	0	0	0	0	0	0	0	0	0
B3GNT8	0	0	0	0	0	0	0	0	0	0
B3GNT9	21	25	8	8	39	36	20	24	27	22
B3GNTL1	6	7	5	20	18	28	22	9	17	25
B4GALNT1	0	0	1	0	8	3	1	4	3	6
B4GALNT2	0	0	0	0	0	1	0	0	0	0
B4GALNT3	1	0	1	5	3	10	1	5	6	8
B4GALNT4	0	0	0	0	0	0	0	0	0	0
B4GALT1	8	2	14	32	13	12	49	43	34	11
B4GALT2	0	4	1	0	0	8	1	2	0	10
B4GALT3	71	71	33	72	188	117	222	240	384	394
B4GALT4	123	86	48	46	138	110	113	106	264	442
B4GALT5	226	228	136	168	360	293	141	247	123	207
B4GALT6	58	106	46	33	84	96	43	77	46	208
B4GALT7	0	2	3	1	10	1	2	2	1	12
B4GAT1	11	3	6	0	0	10	14	16	24	2
B9D1	0	0	0	0	0	0	1	0	5	7
B9D2	1	8	0	0	4	5	4	4	2	14
BAALC	0	0	0	0	0	1	0	0	0	0
BAAT	0	0	1	2	0	1	0	3	0	0
BABAM1	87	92	56	133	150	102	106	126	139	265
BABAM2	39	26	10	38	33	47	15	34	44	61
BACE1	19	6	2	6	6	8	37	13	1	22
BACE2	1	12	1	2	7	4	15	17	0	45
BACH1	54	66	24	165	12	37	120	157	137	127
BACH2	0	2	0	7	1	0	0	0	5	0
BAD	5	7	2	5	6	10	5	7	15	18
BAG1	22	105	7	31	12	45	48	10	39	109
BAG2	108	164	46	163	73	164	226	325	130	401
BAG3	57	20	1	41	1	33	21	61	70	116
BAG4	50	71	19	34	66	93	54	90	43	73
BAG5	3	6	11	10	1	6	16	13	31	13
BAG6	50	49	23	72	82	59	77	69	55	75
BAHCC1	0	0	0	0	0	0	0	0	0	1
BAHD1	10	9	1	6	0	8	7	10	12	0
BAIAP2	364	404	235	446	519	475	400	466	516	702
BAIAP2L1	358	420	11	36	45	436	108	657	598	882
BAIAP2L2	11	12	3	12	4	4	10	11	11	20
BAK1	13	15	5	8	7	4	5	4	17	4
BAMBI	21	4	2	17	6	12	26	20	3	32
BANF1	635	680	319	692	966	697	1204	1380	1018	2297
BANF2	0	0	0	0	0	0	0	0	0	0
BANK1	0	0	1	0	3	0	0	0	0	0
BANP	266	277	171	532	412	263	426	488	313	587
BAP1	36	21	13	5	58	22	20	43	12	17
BARD1	50	47	27	88	31	18	94	103	22	47
BARHL1	0	0	0	0	0	0	0	0	0	0
BARHL2	22	13	0	8	1	8	7	15	14	27
BARX1	2	2	0	0	2	5	0	3	10	28
BARX2	12	18	1	5	18	18	37	36	11	16
BASP1	187	287	3	44	10	131	80	108	179	133
BATF	0	0	0	0	0	0	0	0	0	2
BATF2	0	0	0	0	0	0	0	0	0	0
BATF3	0	0	0	0	0	0	0	0	0	0
BAX	9	5	5	9	11	9	20	23	2	19
BAZ1A	133	118	112	206	89	120	246	273	139	390
BAZ1B	225	215	66	218	233	128	351	315	117	271
BAZ2A	126	205	65	68	175	156	276	188	178	278
BAZ2B	21	20	25	19	69	89	74	101	143	130
BBC3	0	0	0	0	1	0	0	0	0	3
BBIP1	37	21	15	24	18	22	0	48	66	45
BBOF1	0	6	0	12	5	0	0	1	0	25
BBOX1	0	0	0	0	0	0	0	0	0	0
BBS1	0	0	4	0	3	0	0	0	0	0
BBS10	0	2	1	0	0	0	0	9	0	11
BBS12	73	55	72	54	69	81	157	201	80	70
BBS2	640	684	432	535	737	528	1131	996	798	1087
BBS4	205	215	55	118	302	204	168	167	238	520
BBS5	100	140	52	134	161	124	206	280	87	226
BBS7	78	71	46	16	64	55	103	69	35	30
BBS9	46	24	27	52	76	24	227	101	69	150
BBX	25	36	24	53	108	65	24	25	39	137
BCAM	0	0	0	0	0	0	0	0	0	0
BCAN	7	4	0	0	2	5	1	10	25	18
BCAP29	295	271	126	344	352	302	327	384	412	824
BCAP31	29	47	15	42	32	55	16	35	50	163
BCAR1	9	14	9	17	4	24	34	16	15	53
BCAR3	29	51	24	52	53	35	58	65	39	47
BCAR4	209	322	418	639	402	323	624	868	396	1013
BCAS1	0	0	2	0	0	2	7	0	0	13
BCAS2	155	179	65	154	231	224	234	327	199	491
BCAS3	98	114	92	70	166	88	152	190	89	165
BCAS4	0	3	0	0	0	4	0	5	0	2
BCAT1	172	188	78	266	128	186	186	240	299	370
BCAT2	19	15	1	18	22	5	55	31	15	25
BCCIP	153	124	81	124	132	149	183	191	247	607
BCDIN3D	0	0	0	0	0	0	0	0	0	25
BCHE	0	0	0	0	0	0	0	1	0	0
BCKDHA	30	15	7	21	21	21	8	34	16	19
BCKDHB	87	79	34	102	75	79	97	87	109	166
BCKDK	58	25	34	102	103	43	85	100	58	134
BCL10	635	501	356	877	930	739	950	1273	796	929
BCL11A	2	2	0	0	1	3	9	0	2	8
BCL11B	0	1	0	0	0	0	0	0	0	0
BCL2	0	0	0	0	0	0	0	0	0	4
BCL2A1	0	0	0	0	0	0	0	0	0	0
BCL2L1	91	81	47	66	115	115	104	88	112	103
BCL2L10	941	935	524	1099	1047	902	1327	1630	1187	2144
BCL2L11	5	22	1	16	27	25	26	3	41	90
BCL2L12	11	15	8	11	14	20	33	21	40	45
BCL2L13	10	12	11	0	25	3	9	15	34	40
BCL2L14	33	39	11	30	35	30	38	33	47	70
BCL2L15	0	0	1	0	0	0	0	0	0	0
BCL2L2	66	30	14	11	46	23	108	25	31	89
BCL3	21	22	10	17	24	22	23	46	26	51
BCL6	0	2	3	12	7	8	6	8	10	14
BCL6B	82	150	44	147	94	47	297	224	145	115
BCL7A	82	74	9	53	57	34	16	47	124	101
BCL7B	161	265	83	115	155	343	148	228	384	676
BCL7C	4	13	2	2	5	18	0	12	16	48
BCL9	45	125	17	87	47	53	41	73	52	96
BCL9L	0	3	0	1	4	0	4	3	2	20
BCLAF1	58	86	84	91	131	36	203	135	78	88
BCLAF3	67	100	40	26	58	116	152	150	136	235
BCNT2	784	790	638	1206	1145	889	2545	2755	1018	1873
BCO1	0	0	0	0	0	0	0	0	0	0
BCO2	8	0	0	5	0	0	0	0	0	0
BCOR	181	132	83	195	294	193	429	414	152	247
BCORL1	18	6	10	9	11	15	24	25	15	58
BCR	0	0	0	4	0	0	0	0	0	1
BCS1L	20	14	20	35	50	37	52	26	29	41
BDA20	0	0	0	0	0	0	0	0	0	0
BDH1	2	5	3	14	22	11	20	11	21	5
BDH2	0	0	0	0	0	0	0	0	0	0
BDKRB1	0	0	0	0	0	0	0	0	0	0
BDKRB2	0	0	0	0	0	0	0	0	0	0
BDNF	7	9	10	17	21	30	40	13	33	38
BDP1	45	42	29	56	44	34	102	125	54	83
BEAN1	0	0	0	0	0	2	0	0	0	0
BECN1	224	160	100	237	261	243	229	370	352	385
BECN2	0	0	0	0	0	0	0	0	0	0
BEGAIN	0	0	0	0	0	0	0	0	0	0
BEND2	0	0	0	0	0	0	0	0	0	0
BEND3	6	9	1	0	9	6	5	13	8	7
BEND4	12	35	5	16	9	27	16	16	12	38
BEND5	0	0	1	1	0	0	0	0	0	5
BEND6	0	0	0	0	0	0	0	0	0	0
BEND7	9	1	2	0	4	1	0	2	13	23
BERV-K1	0	0	0	0	0	0	0	0	0	0
BEST1	0	0	0	0	0	0	0	0	0	0
BEST2	1	0	0	0	0	1	7	0	0	0
BEST3	5	4	11	0	0	5	31	58	12	0
BEST4	0	0	0	0	0	0	0	0	0	0
BET1	44	91	127	258	134	63	316	403	109	191
BET1L	15	0	7	20	22	6	24	39	10	5
BEX2	0	0	0	0	0	0	0	0	0	0
BEX3	5	0	2	0	0	0	8	4	10	20
BEX4	55	52	3	5	37	44	0	11	37	47
BEX5	0	0	0	0	0	0	0	0	0	0
BFAR	27	35	9	29	16	39	51	46	15	30
BFSP1	0	0	0	0	0	0	2	0	7	0
BFSP2	0	0	0	0	0	0	0	0	0	0
BGLAP	0	0	0	0	0	0	0	0	0	0
BGN	0	0	0	0	0	0	0	0	0	0
BHLHA15	0	0	0	0	0	0	0	0	0	0
BHLHA9	0	0	0	0	0	0	0	0	0	0
BHLHE22	2	2	5	2	1	9	3	14	17	2
BHLHE23	0	0	0	0	0	0	0	0	0	0
BHLHE40	0	0	0	8	0	0	0	0	0	0
BHLHE41	0	0	0	0	0	2	0	2	0	2
BHMG1	4	3	0	0	1	0	0	4	0	1
BHMT	9	18	11	10	20	11	7	26	16	49
BHMT2	0	0	0	0	0	0	0	0	0	0
BICC1	129	213	137	246	258	260	242	337	143	448
BICD1	12	30	17	58	17	11	40	31	81	20
BICD2	30	22	6	0	28	16	20	76	17	40
BICDL1	17	11	4	14	0	6	23	6	17	51
BICDL2	25	25	24	24	39	12	7	37	12	62
BICRA	6	4	2	9	3	1	2	5	5	9
BICRAL	36	16	4	45	31	28	0	34	4	16
BID	2	4	2	19	22	13	1	13	13	27
BIK	0	0	0	0	0	0	0	0	0	0
BIN1	0	0	1	0	0	0	0	0	0	32
BIN2	223	277	131	252	526	267	222	271	351	712
BIN3	102	95	48	88	122	139	96	101	160	321
BIRC2	65	93	60	113	92	119	196	199	267	435
BIRC3	182	131	34	159	94	118	117	130	143	171
BIRC5	474	464	270	611	627	509	1021	889	839	1297
BIRC6	61	50	24	47	8	51	96	173	23	87
BIRC7	0	0	0	0	0	0	0	0	0	0
BIVM	1	20	2	0	0	3	11	2	29	0
BLA-DQB	0	0	0	0	0	0	0	0	0	0
BLCAP	293	318	153	405	319	237	497	566	622	891
BLK	0	0	0	10	0	0	0	0	0	0
BLM	626	634	298	973	1146	701	1104	1097	904	968
BLMH	806	731	439	863	900	682	1292	1433	1208	2074
BLNK	0	0	0	0	0	0	0	0	0	0
BLOC1S1	9	6	6	8	5	4	11	7	8	17
BLOC1S2	9	0	3	0	13	11	0	1	11	51
BLOC1S3	0	1	0	0	0	0	0	0	0	0
BLOC1S4	0	3	0	0	0	4	0	0	0	2
BLOC1S5	270	277	91	190	275	247	327	282	421	356
BLOC1S6	29	20	9	11	30	64	0	20	97	32
BLVRA	0	1	0	0	0	0	0	0	0	0
BLVRB	0	0	0	0	0	0	0	0	3	0
BLZF1	252	354	224	436	473	359	392	325	477	776
BMF	21	14	3	27	14	3	30	14	15	0
BMI1	2	0	3	0	0	0	0	0	14	25
BMP1	0	0	0	0	0	0	0	0	0	0
BMP10	0	0	0	0	0	0	0	0	0	0
BMP15	6428	6476	2927	6121	10132	7194	9565	8477	11726	13541
BMP2	0	0	0	0	0	0	0	0	0	0
BMP2K	25	39	16	7	3	24	25	17	10	68
BMP3	2	7	2	6	15	0	13	5	19	9
BMP4	42	20	10	62	64	15	3	34	80	134
BMP5	0	0	0	0	0	0	0	0	0	0
BMP6	14	36	6	36	11	61	47	28	37	146
BMP7	0	0	3	0	0	0	0	3	0	0
BMP8A	0	0	0	0	0	0	0	0	0	0
BMP8B	0	0	0	0	0	0	0	0	0	0
BMPER	0	0	0	0	15	0	0	0	12	0
BMPR1A	151	148	160	136	223	215	251	371	105	303
BMPR1B	304	267	179	398	433	303	291	377	352	560
BMPR2	98	168	56	130	124	74	104	107	54	214
BMS1	18	48	21	38	30	45	66	45	37	39
BMT2	1	16	0	3	1	7	1	16	32	44
BMX	0	0	0	0	0	0	0	0	0	0
BNC1	32	26	11	0	29	21	0	17	56	48
BNC2	565	518	329	831	934	606	1540	965	1050	909
BNIP1	11	19	7	38	38	42	41	22	18	35
BNIP2	7	1	2	13	11	5	0	0	10	3
BNIP3	270	323	161	326	460	313	365	467	448	663
BNIP3L	324	375	209	312	487	392	301	365	396	908
BNIPL	6	6	5	6	2	0	13	4	0	20
BOC	880	818	463	981	1577	1103	713	886	866	1292
BOD1	51	118	41	76	95	123	69	127	142	522
BOD1L1	9	22	17	44	44	36	53	58	6	42
BOK	0	0	0	0	0	0	0	0	0	0
BOLA	0	0	0	0	0	1	0	0	2	0
BOLA-DMA	9	5	4	20	12	18	5	11	13	13
BOLA-DMB	0	0	0	0	0	0	0	0	11	0
BOLA-DOA	0	0	0	0	0	0	0	0	0	0
BOLA-DOB	0	0	0	0	0	0	0	0	0	0
BOLA-DQA2	0	0	0	0	0	0	0	0	0	0
BOLA-DQA5	0	0	0	0	0	0	0	0	0	0
BOLA-DQB	0	0	0	0	0	0	0	0	0	0
BOLA-DRA	0	0	0	0	0	0	0	0	0	0
BOLA-DRB2	0	0	0	0	0	0	0	0	0	0
BOLA-DRB3	0	0	0	1	0	0	0	0	0	0
BOLA-DYA	0	0	0	0	0	0	0	0	0	0
BOLA-DYB	0	0	0	0	0	0	0	0	0	0
BOLA-NC1	0	0	0	0	0	0	0	0	0	0
BOLA1	0	1	0	0	2	1	0	1	0	6
BOLA2B	14	20	19	25	23	13	27	31	22	60
BOLA3	9	1	0	3	5	6	0	8	0	22
BOLL	53	50	24	72	78	41	61	57	35	85
BOP1	19	11	0	10	2	14	5	15	5	25
BORA	336	407	165	180	500	356	441	499	791	1140
BORCS5	58	87	61	137	125	86	128	161	114	176
BORCS6	14	6	3	1	0	8	12	0	20	0
BORCS7	2	7	6	40	17	11	22	22	15	80
BORCS8	8	6	1	4	3	10	4	7	3	20
BOSTAUV1R403	0	0	0	0	0	0	0	0	0	0
BOSTAUV1R404	0	0	0	0	0	0	0	0	0	0
BOSTAUV1R414	0	0	0	0	0	0	0	0	0	5
BOSTAUV1R416	0	0	0	0	0	0	0	0	0	0
BOSTAUV1R417	0	0	2	7	5	0	0	10	6	8
BOSTAUV1R418	0	0	0	0	0	0	0	0	0	0
BOSTAUV1R419	0	0	0	0	0	0	0	0	0	0
BOSTAUV1R424	0	0	0	0	0	0	0	0	0	0
BOSTAUV1R425	0	0	4	0	0	1	0	0	0	0
BOSTAUV1R426	0	0	0	0	0	0	0	0	0	0
BOTA-T2R10B	0	0	0	0	0	0	0	0	0	0
BPGM	337	372	216	400	468	404	589	767	436	839
BPHL	31	26	8	34	35	34	59	42	35	54
BPI	0	0	0	0	0	0	0	0	0	0
BPIFA1	0	0	0	0	0	0	0	0	0	0
BPIFA2A	0	0	0	0	0	0	0	0	0	0
BPIFA2B	0	0	0	0	0	0	0	0	0	0
BPIFA2C	0	0	0	0	0	0	0	0	0	0
BPIFA2D	0	0	0	0	0	0	0	0	0	0
BPIFA3	0	0	0	0	0	0	0	0	0	0
BPIFA4	0	0	0	0	0	0	0	0	0	0
BPIFB1	0	0	0	0	0	0	0	0	0	0
BPIFB2	0	0	0	0	0	0	0	0	0	0
BPIFB3	0	0	0	0	0	0	0	0	0	0
BPIFB4	0	0	0	0	0	0	0	0	0	0
BPIFB5	0	0	0	0	0	0	0	0	0	0
BPIFB6	0	0	0	0	0	0	0	0	0	0
BPIFC	0	0	0	0	0	0	0	0	0	0
BPNT1	84	101	84	121	113	129	77	112	50	162
BPTF	9	51	20	14	61	24	38	55	11	139
BRAF	137	79	42	135	80	161	53	91	122	269
BRAP	312	280	133	214	488	309	479	316	453	597
BRAT1	0	0	0	0	0	0	5	0	1	5
BRB	0	0	0	4	0	0	0	0	0	0
BRCA1	111	92	76	147	177	104	438	427	119	374
BRCA2	394	342	271	629	369	311	597	687	596	1191
BRCC3	91	83	38	118	87	85	194	206	98	133
BRD1	6	20	0	11	8	11	14	7	27	42
BRD2	328	328	250	661	589	299	1239	843	429	712
BRD3	118	137	35	146	53	105	191	218	157	345
BRD3OS	19	8	11	14	8	12	17	46	9	36
BRD4	67	111	58	128	104	99	135	133	124	358
BRD7	248	591	163	361	317	712	361	463	401	987
BRD8	259	315	86	233	520	442	263	318	394	422
BRD9	72	154	19	84	48	148	107	113	154	372
BRDT	3	3	1	10	4	3	6	9	2	17
BREH1	0	0	0	0	0	0	0	0	0	0
BRF1	3	1	0	0	0	3	0	0	0	0
BRF2	31	12	7	5	44	18	8	12	10	41
BRI3	14	21	7	19	11	29	14	17	15	60
BRI3BP	95	132	32	69	45	110	69	72	155	204
BRICD5	1	0	1	0	0	0	0	2	0	2
BRINP1	12	2	0	0	0	4	0	0	0	3
BRINP2	361	429	166	312	622	418	361	470	484	532
BRINP3	0	6	0	0	0	0	0	12	12	1
BRIP1	308	234	187	157	455	303	249	291	175	269
BRIX1	507	481	349	539	678	769	550	667	809	1158
BRK1	261	237	149	229	361	284	371	516	447	957
BRMS1	53	37	30	46	69	57	33	68	54	95
BRMS1L	228	153	110	293	288	179	251	322	306	321
BROX	106	78	70	96	127	77	47	155	151	187
BRPF1	133	148	62	116	243	188	123	150	161	157
BRPF3	3503	3112	1259	3372	4779	3326	3264	3663	3159	3343
BRS3	0	0	0	0	0	0	0	0	0	0
BRSK1	0	0	0	0	0	0	0	0	0	0
BRSK2	0	1	0	0	2	0	0	0	0	0
BRWD1	63	33	16	56	15	127	119	102	70	113
BRWD3	25	56	21	20	74	42	38	15	71	176
BSCL2	28	39	17	36	49	34	54	60	93	80
BSDC1	61	48	18	64	59	57	82	59	33	68
BSG	104	122	70	98	190	125	155	176	169	384
BSN	0	0	0	10	0	0	0	0	2	3
BSND	0	0	0	1	3	0	0	0	0	0
BSP1	1	0	9	19	6	6	5	28	30	86
BSP3	0	0	0	0	0	0	0	0	0	0
BSP5	0	0	0	0	0	0	0	0	0	0
BSPRY	122	171	53	258	143	220	221	207	238	252
BST1	0	0	0	0	0	0	0	0	0	0
BSX	8	7	8	11	18	11	18	13	7	46
BTAF1	65	74	20	52	28	48	58	131	117	123
BTBD1	0	0	1	0	0	0	0	0	0	6
BTBD10	1207	1254	617	1269	2001	1411	1993	2168	1914	2831
BTBD11	5	2	6	0	0	0	0	0	5	0
BTBD16	0	0	3	0	0	0	1	3	1	4
BTBD17	0	0	0	0	0	0	0	0	0	0
BTBD19	16	21	28	58	36	49	64	120	69	37
BTBD2	10	11	9	20	14	7	14	29	2	40
BTBD3	18	33	7	3	6	57	21	11	50	95
BTBD6	17	5	7	0	8	13	7	9	9	83
BTBD7	29	60	6	6	54	84	26	41	53	136
BTBD8	26	31	7	48	2	33	100	57	10	44
BTBD9	517	508	274	819	681	557	1001	1223	597	820
BTC	0	0	0	0	0	0	0	0	0	0
BTD	14	1	8	22	24	10	12	9	17	25
BTF3	781	764	517	1045	1012	781	1258	1395	973	1829
BTF3L4	170	194	91	141	234	192	173	141	199	400
BTG1	3	0	3	5	11	12	7	15	24	50
BTG2	0	0	0	0	1	0	0	0	0	2
BTG3	0	0	6	0	0	9	0	0	2	1
BTG4	35686	33685	14535	27401	49384	38590	26132	33225	52649	89768
BTK	208	272	72	151	582	382	214	227	823	951
BTLA	0	0	0	0	0	0	0	0	0	0
BTN1A1	0	0	0	0	0	0	0	0	0	0
BTN3A3	0	0	0	0	0	0	0	0	0	0
BTNL2	0	0	5	0	0	0	0	0	0	0
BTNL9	0	0	0	0	0	0	0	0	0	0
BTRC	677	701	405	798	1103	934	1013	1250	668	1227
BUB1	128	132	125	161	299	135	393	391	161	118
BUB1B	160	219	139	280	337	250	580	856	203	148
BUB3	2105	1874	1189	2028	3037	2428	2051	2980	3245	5804
BUD13	253	214	141	134	261	232	285	342	308	399
BUD23	108	107	73	104	127	81	152	238	153	432
BUD31	54	63	62	118	109	64	89	143	79	222
BVES	14	8	5	0	3	18	0	19	27	1
BYSL	52	63	19	61	71	42	47	74	66	84
BZW1	281	398	164	321	450	373	579	615	537	676
BZW2	182	178	118	181	224	143	271	280	166	360
BoLA	0	0	0	0	0	0	0	0	0	0
C10H14orf1	9	24	11	20	5	3	21	9	19	47
C10H14orf119	502	444	364	613	559	438	529	937	846	1383
C10H14orf39	12	2	9	1	67	17	13	34	1	9
C10H14orf93	0	0	0	0	0	0	0	0	0	0
C10H15orf41	37	39	26	61	53	31	64	34	40	151
C10H15orf48	16	9	11	7	23	21	21	27	18	40
C10H15orf59	0	0	2	0	0	1	1	0	0	0
C10H15orf61	20	24	7	19	9	15	9	26	39	98
C10H15orf62	1	0	0	0	0	0	0	0	0	0
C10H15orf65	4	2	1	0	2	3	5	6	0	9
C11H2orf15	0	0	0	0	0	0	0	0	0	0
C11H2orf16	1	2	3	1	5	4	0	5	6	20
C11H2orf40	0	0	0	0	0	0	0	0	0	0
C11H2orf42	260	267	174	311	372	303	311	561	333	381
C11H2orf49	87	53	32	81	104	75	48	65	60	165
C11H2orf50	0	0	0	0	0	0	0	0	0	0
C11H2orf68	12	11	13	16	15	12	33	33	14	37
C11H2orf70	0	0	0	0	0	0	0	0	0	0
C11H2orf71	0	0	0	0	0	0	0	0	0	0
C11H2orf73	0	0	0	0	0	0	1	0	0	0
C11H2orf74	0	0	0	0	0	0	0	0	0	0
C11H2orf78	0	0	0	0	0	0	0	0	0	0
C11H2orf81	2	0	0	0	0	6	0	0	0	0
C11H2orf92	1	4	1	0	1	0	11	5	7	0
C11H9orf116	0	7	4	0	4	14	13	11	10	3
C11H9orf16	11	0	0	11	4	2	4	3	6	32
C11H9orf50	0	0	0	0	0	0	2	1	0	1
C11H9orf78	112	102	68	78	170	114	189	232	127	352
C12H13orf42	0	0	0	0	0	0	0	0	0	0
C12H13orf46	0	0	0	0	0	0	0	0	2	0
C13H10orf113	0	0	0	0	0	0	0	0	0	0
C13H10orf67	0	0	0	0	0	1	0	0	0	0
C13H20orf141	0	0	0	0	0	0	0	0	0	0
C13H20orf144	0	0	0	0	0	0	0	0	0	0
C13H20orf173	0	0	0	0	0	0	0	0	0	0
C13H20orf194	3	3	1	1	7	18	16	18	20	8
C13H20orf202	0	0	0	0	0	0	0	0	0	8
C13H20orf204	0	0	0	0	0	0	0	0	0	0
C13H20orf27	212	187	102	247	247	216	391	484	276	571
C13H20orf85	0	0	0	0	0	0	0	0	0	0
C13H20orf96	0	0	1	0	0	2	0	0	0	0
C14H8orf33	0	1	1	6	6	4	5	6	14	15
C14H8orf34	1	1	0	0	0	6	0	0	5	2
C14H8orf37	117	139	76	197	158	110	309	290	222	192
C14H8orf59	6	5	3	12	30	17	13	9	26	39
C14H8orf76	270	247	194	423	464	454	396	544	297	905
C14H8orf82	3	3	0	0	1	4	1	0	6	4
C14H8orf88	18	14	5	0	19	32	8	7	41	52
C14H8orf89	9	3	8	0	3	4	3	1	13	10
C15H11orf1	2	2	3	10	8	1	4	1	6	12
C15H11orf16	377	315	230	486	697	500	315	417	653	1045
C15H11orf34	0	0	0	0	0	0	0	0	0	0
C15H11orf42	0	0	0	0	0	0	0	0	0	0
C15H11orf49	0	0	0	0	5	2	0	5	5	0
C15H11orf52	61	49	56	79	126	101	75	44	62	250
C15H11orf53	0	0	0	0	0	0	0	0	0	0
C15H11orf58	553	632	287	556	1091	856	709	767	1028	1430
C15H11orf65	0	0	0	0	0	0	0	0	0	0
C15H11orf71	8	18	8	14	15	12	19	16	10	50
C15H11orf74	30	25	16	20	53	28	47	35	64	95
C15H11orf87	0	0	0	0	0	0	0	0	0	0
C15H11orf88	3	1	0	0	0	0	0	0	0	1
C15H11orf91	0	0	0	0	0	0	0	0	0	0
C15H11orf94	0	0	0	0	0	0	0	0	0	0
C15H11orf96	0	0	0	0	0	0	0	0	0	0
C15H11orf97	0	0	0	0	0	0	0	0	0	0
C16H1orf100	0	0	0	0	0	0	0	0	0	0
C16H1orf105	2	2	0	10	6	3	2	4	2	9
C16H1orf112	122	86	114	102	216	185	114	245	179	296
C16H1orf115	3	0	0	0	0	0	0	0	0	0
C16H1orf116	10	8	0	0	6	5	0	1	0	0
C16H1orf158	0	0	0	0	0	0	0	0	0	0
C16H1orf159	2	0	0	0	0	0	0	0	0	1
C16H1orf167	0	0	0	0	1	1	0	0	1	1
C16H1orf174	0	0	0	0	0	0	0	0	1	3
C16H1orf21	27	59	4	13	47	17	17	23	17	60
C16H1orf53	5	7	0	3	2	9	3	10	8	29
C16H1orf74	24	24	7	69	42	30	34	18	39	43
C17H12orf43	23	25	6	11	24	15	29	16	50	74
C17H12orf49	171	134	33	91	98	172	151	206	183	518
C17H12orf65	6	23	11	27	13	15	28	37	41	83
C17H22orf15	0	0	0	0	0	0	0	0	0	0
C17H22orf31	0	0	2	0	1	0	0	2	1	0
C17H22orf39	17	7	0	5	0	10	5	11	10	31
C17H4orf33	159	110	133	186	182	137	638	438	133	346
C17H4orf45	0	0	0	0	0	0	0	0	0	0
C17H4orf46	0	0	0	1	0	0	14	0	6	0
C17H4orf51	0	0	1	0	0	0	1	0	0	0
C17H5orf52	0	0	0	0	1	2	0	0	1	1
C18H16orf46	139	106	41	78	133	121	141	117	175	255
C18H16orf70	355	418	179	237	596	468	385	467	395	461
C18H16orf74	64	128	18	41	27	172	67	161	105	300
C18H16orf78	0	0	0	0	0	0	0	0	0	0
C18H16orf86	0	0	0	0	0	0	0	0	0	0
C18H16orf87	10	16	10	17	5	27	56	22	26	48
C18H16orf95	0	0	0	0	0	0	0	3	0	0
C18H19orf12	29	61	5	10	48	14	8	44	82	94
C18H19orf18	0	0	0	0	0	0	0	3	0	0
C18H19orf33	0	0	0	0	0	0	0	0	0	0
C18H19orf47	29	17	8	24	22	22	44	16	30	19
C18H19orf48	15	27	15	53	49	24	27	44	17	26
C18H19orf54	13	33	26	35	21	34	22	55	41	69
C18H19orf73	0	0	0	0	0	0	0	0	0	0
C18H19orf81	1	0	1	0	3	0	0	0	0	0
C18H19orf84	10	5	4	9	24	12	8	10	2	14
C19H17orf100	0	1	0	0	0	0	0	0	0	0
C19H17orf107	0	1	0	1	0	0	0	1	0	0
C19H17orf113	132	138	99	187	331	182	195	161	230	355
C19H17orf47	0	0	2	0	0	0	0	0	0	0
C19H17orf49	267	265	190	352	382	330	524	632	423	963
C19H17orf50	0	0	0	0	0	0	0	0	0	0
C19H17orf53	31	46	27	79	34	41	68	66	68	193
C19H17orf58	37	59	14	25	50	28	16	43	58	86
C19H17orf64	0	0	0	0	0	0	0	0	0	0
C19H17orf67	0	0	0	0	0	0	0	0	0	0
C19H17orf75	21	13	11	36	29	12	9	38	0	7
C19H17orf78	1	0	2	3	3	1	0	0	2	4
C19H17orf80	5	8	15	19	21	10	11	19	28	16
C19H17orf97	0	0	5	2	6	2	0	15	0	13
C19H17orf98	0	0	0	0	0	0	0	0	0	1
C1D	51	75	47	57	150	34	61	202	108	289
C1GALT1	18	11	1	11	5	19	10	18	85	113
C1GALT1C1	13	29	23	38	57	45	74	53	41	108
C1H21orf140	0	0	0	0	0	0	0	0	0	0
C1H21orf2	0	0	0	0	0	0	1	1	0	3
C1H21orf58	0	0	0	1	1	0	0	0	0	1
C1H21orf62	0	0	0	0	0	0	9	0	0	0
C1H21orf91	274	272	148	286	497	377	423	550	346	590
C1H3orf30	0	0	0	0	0	0	0	0	0	0
C1H3orf33	8	0	1	9	2	4	23	8	0	16
C1H3orf38	839	749	517	1109	1435	850	1191	1447	1117	1659
C1H3orf52	0	0	5	0	1	7	0	2	18	28
C1H3orf58	0	0	0	0	0	0	22	0	0	0
C1H3orf70	50	28	8	1	17	39	19	41	65	109
C1H3orf80	0	0	0	0	0	0	0	0	0	0
C1H3orf85	0	0	0	0	0	0	0	0	0	0
C1QA	0	0	0	0	0	0	0	0	0	0
C1QB	0	0	0	0	0	0	0	0	0	0
C1QBP	403	367	6	431	25	416	312	376	567	1039
C1QC	0	0	0	0	0	0	0	0	0	0
C1QL1	0	0	0	0	0	0	0	0	0	0
C1QL2	0	0	0	0	0	0	0	0	0	0
C1QL3	4	4	0	0	2	6	8	8	2	5
C1QL4	0	0	0	0	0	0	0	5	0	3
C1QTNF1	0	0	0	0	0	0	0	0	0	0
C1QTNF12	0	0	0	0	0	0	0	0	0	0
C1QTNF2	0	0	0	0	0	0	0	0	0	0
C1QTNF3	0	0	0	0	0	0	0	0	0	0
C1QTNF4	0	0	0	0	0	0	0	0	0	0
C1QTNF5	0	0	0	0	0	0	0	0	0	0
C1QTNF6	0	0	0	0	0	0	0	0	0	0
C1QTNF7	0	0	0	0	0	0	0	0	0	0
C1QTNF8	0	0	0	0	0	0	0	0	0	0
C1QTNF9	0	0	0	0	0	0	0	0	0	0
C1R	0	0	0	0	0	0	0	0	0	0
C1RL	0	0	0	0	0	0	0	0	0	0
C1S	0	0	0	0	0	0	0	0	0	0
C2	0	0	0	0	0	0	0	0	0	0
C20H5orf22	204	176	129	247	319	195	332	319	325	340
C20H5orf34	224	241	124	217	265	151	292	371	166	326
C20H5orf47	6	17	13	12	34	14	30	35	12	57
C20H5orf49	0	0	0	1	3	0	0	0	4	0
C20H5orf51	734	592	297	961	1058	675	739	774	725	991
C20H5orf58	17	32	12	20	38	47	30	50	57	134
C21H14orf132	0	0	0	0	0	0	0	0	0	0
C21H14orf180	0	0	0	0	0	0	0	0	0	0
C21H14orf28	3	0	0	0	0	3	6	0	3	7
C21H15orf39	30	29	2	24	11	31	38	46	43	73
C21H15orf40	1	1	0	5	6	0	2	4	3	8
C22H3orf14	39	33	36	41	79	39	70	52	109	117
C22H3orf18	0	0	0	0	0	0	0	0	0	0
C22H3orf20	3	0	0	0	0	0	0	0	1	0
C22H3orf22	0	0	0	0	0	0	0	0	0	0
C22H3orf35	0	0	0	0	0.5	1.51	0	0	0	4.52
C22H3orf49	1	0	5	0	2	0	10	1	5	6
C22H3orf62	0	0	4	3	4	4	5	0	0	20
C22H3orf67	62	50	22	91	82	43	144	118	104	75
C22H3orf84	0	0	0	0	0	0	0	0	0	0
C23H6orf10	0	0	0	0	0	0	0	0	0	0
C23H6orf106	121	172	75	118	169	158	139	153	107	346
C23H6orf132	0	6	0	0	0	0	0	0	10	9
C23H6orf136	15	16	14	17	24	16	21	23	38	52
C23H6orf141	9	5	4	15	20	15	16	19	47	29
C23H6orf15	2	0	0	0	0	0	3	2	0	0
C23H6orf201	1	2	0	1	2	0	1	0	1	3
C23H6orf222	2	0	5	0	6	0	0	1	12	26
C23H6orf223	0	0	0	0	0	0	0	0	0	0
C23H6orf226	82	96	75	190	150	119	106	139	163	279
C23H6orf47	0	0	0	0	0	0	0	0	0	0
C23H6orf52	42	38	50	57	42	52	54	73	74	148
C23H6orf62	1	8	5	1	6	4	5	9	24	52
C23H6orf89	219	202	83	127	139	77	149	121	163	154
C24H18orf21	13	10	3	4	23	3	8	3	34	56
C24H18orf25	205	214	151	321	329	295	363	473	343	336
C24H18orf32	706	810	525	816	884	646	1180	1240	1096	1864
C24H18orf54	23	23	33	34	60	52	74	17	57	28
C24H18orf63	4	13	3	8	50	49	21	13	34	8
C25H16orf45	2	0	0	0	0	0	0	0	0	0
C25H16orf54	0	0	0	0	0	0	0	0	0	0
C25H16orf58	1	0	0	0	3	1	0	0	4	2
C25H16orf71	0	2	0	0	3	1	0	3	0	0
C25H16orf72	4	51	5	28	68	33	21	41	22	52
C25H16orf82	0	0	0	2	0	0	0	0	0	0
C25H16orf89	1	0	0	0	0	0	0	0	0	0
C25H16orf90	0	0	0	0	0	0	0	0	0	0
C25H16orf91	70	45	4	52	19	69	68	78	79	112
C25H16orf92	0	0	0	0	0	0	0	0	0	0
C25H16orf96	0	3	0	0	2	3	10	0	9	4
C25H7orf26	22	20	15	16	9	18	31	13	35	120
C25H7orf43	1	20	4	1	2	17	5	6	4	27
C25H7orf50	7	6	7	18	9	12	9	5	9	34
C25H7orf61	0	0	0	0	0	0	0	0	0	4
C26H10orf120	0	0	0	0	0	0	0	0	0	0
C26H10orf143	37	45	21	65	31	37	103	123	76	162
C26H10orf62	9	2	1	8	12	2	17	5	12	9
C26H10orf82	0	0	0	0	0	0	0	0	0	0
C26H10orf88	24	25	12	30	39	18	24	47	6	52
C26H10orf90	204	208	165	402	291	190	299	352	383	476
C26H6orf52	0	0	0	0	1	0	0	0	0	2
C27H4orf47	4	0	5	0	30	7	1	2	12	9
C27H8orf48	3	0	1	0	7	0	0	0	2	0
C28H10orf105	0	0	0	0	0	0	0	0	0	0
C28H10orf53	0	0	0	0	0	0	0	0	0	0
C28H10orf71	0	0	0	0	0	0	0	0	0	0
C28H10orf99	0	0	0	0	0	0	0	0	0	0
C28H1orf131	132	112	99	163	174	160	161	206	182	316
C28H1orf198	13	0	2	12	8	14	13	12	8	32
C29H11orf24	47	34	1	19	2	23	22	39	54	84
C29H11orf54	0	3	2	0	2	0	0	12	0	52
C29H11orf68	0	4	0	0	0	0	0	0	0	0
C29H11orf80	33	47	21	30	32	11	51	42	22	16
C29H11orf86	0	0	0	0	0	0	0	1	0	0
C29H11orf95	0	0	0	0	0	3	0	0	0	2
C29H11orf98	778	860	540	875	1107	1046	811	1182	1103	2229
C2CD2	0	7	0	0	0	2	0	0	0	0
C2CD2L	10	17	0	0	0	12	1	19	1	30
C2CD3	14	9	2	9	8	10	4	9	34	17
C2CD4B	0	0	0	0	0	0	0	0	0	0
C2CD4C	0	0	0	0	0	2	0	0	0	0
C2CD4D	0	0	0	0	0	0	0	0	0	0
C2CD5	68	82	57	92	141	67	181	195	94	78
C2CD6	0	0	0	0	0	0	0	0	0	0
C2H2orf66	367	319	205	307	383	317	239	398	538	959
C2H2orf69	45	60	33	128	83	32	93	41	97	87
C2H2orf72	0	0	0	0	0	0	0	0	0	0
C2H2orf76	37	41	38	53	74	83	79	130	108	142
C2H2orf80	25	33	7	34	45	28	82	77	30	70
C2H2orf88	0	8	0	0	0	0	0	0	0	0
C3	0	0	0	0	0	0	0	0	0	0
C3AR1	0	0	0	0	0	0	0	0	0	0
C3H1orf109	32	63	19	18	46	71	31	31	45	66
C3H1orf123	24	20	25	37	52	38	33	46	43	117
C3H1orf141	0	0	0	0	0	0	0	0	0	0
C3H1orf146	2	4	0	0	6	4	1	5	9	38
C3H1orf162	0	1	1	0	0	0	0	0	0	0
C3H1orf185	0	0	0	0	0	0	0	0	0	0
C3H1orf189	0	0	0	4	0	2	0	0	0	9
C3H1orf194	6	0	1	0	0	3	0	2	2	7
C3H1orf210	10	3	5	11	15	5	0	2	9	0
C3H1orf216	0	0	0	0	0	0	0	0	0	0
C3H1orf226	0	15	0	0	3	13	16	12	17	12
C3H1orf43	150	160	81	228	232	264	185	213	163	352
C3H1orf50	16	19	19	37	26	16	20	39	39	39
C3H1orf52	11	8	1	20	28	8	11	3	46	48
C3H1orf54	0	0	0	0	3	0	0	0	0	0
C3H1orf56	2	1	0	1	9	2	8	3	0	7
C3H1orf68	0	0	0	0	0	0	0	0	0	0
C3H1orf87	0	0	0	0	0	0	0	0	0	0
C3H1orf94	0	0	0	0	0	0	0	0	0	0
C3H2orf54	0	0	0	0	0	0	0	0	0	0
C4A	0	0	0	0	0	0	0	0	0	0
C4BPA	0	0	0	0	0	0	0	0	0	0
C4BPB	0	0	0	0	0	0	0	0	0	0
C4H7orf25	247	191	162	201	355	265	253	219	250	434
C4H7orf31	63	35	19	35	61	28	22	85	129	73
C4H7orf57	20	8	11	6	18	19	31	35	31	27
C5	20	29	11	8	12	22	10	37	52	18
C5AR1	0	0	0	8	0	0	0	0	0	0
C5AR2	0	0	0	0	0	0	0	0	0	0
C5H12orf10	11	13	11	19	5	10	26	20	7	29
C5H12orf29	52	41	15	42	51	46	29	53	51	27
C5H12orf4	174	182	133	154	185	185	216	343	114	425
C5H12orf40	72	79	60	73	91	95	158	162	53	128
C5H12orf42	0	0	0	0	0	0	0	0	0	0
C5H12orf45	55	51	67	91	169	78	126	192	79	200
C5H12orf50	0	0	2	0	3	0	16	6	0	0
C5H12orf54	0	0	0	0	0	0	0	0	0	0
C5H12orf56	0	0	0	0	0	0	0	0	0	0
C5H12orf57	15	11	8	14	35	20	60	40	28	45
C5H12orf60	0	3	0	0	3	0	0	0	1	1
C5H12orf66	12	6	4	1	22	8	5	11	1	9
C5H12orf71	0	0	0	0	0	0	0	0	0	0
C5H12orf73	33	39	26	46	58	26	105	79	60	95
C5H12orf75	11	14	6	22	4	22	18	19	19	44
C5H12orf80	0	0	0	0	0	0	0	0	0	0
C5H22orf23	0	0	0	1	0	0	2	0	0	0
C5H22orf46	166	195	62	109	204	180	109	120	310	528
C6	0	0	0	0	0	0	0	0	0	0
C6H4orf17	21	18	16	24	15	29	39	51	32	68
C6H4orf19	0	2	5	0	0	9	0	0	8	9
C6H4orf3	91	114	24	162	136	107	138	79	126	133
C6H4orf36	0	0	1	0	0	2	1	0	10	0
C6H4orf48	0	0	0	0	0	0	0	0	0	1
C6H4orf50	2	0	2	0	1	0	0	0	0	0
C6H4orf54	0	0	0	0	0	0	0	0	0	0
C7	0	0	0	0	0	0	0	0	0	0
C7H19orf24	10	6	3	4	9	6	11	13	6	4
C7H19orf25	0	5	1	0	0	0	0	0	0	9
C7H19orf38	2	3	0	0	0	0	0	3	1	0
C7H19orf44	15	24	18	1	38	18	24	27	19	48
C7H19orf53	3	16	5	9	24	10	11	15	7	19
C7H19orf57	30	30	18	32	76	25	67	57	43	71
C7H19orf66	8	13	1	17	5	14	8	11	9	0
C7H19orf67	28	27	23	25	41	22	19	48	26	42
C7H19orf70	4	3	6	3	8	1	8	7	6	15
C7H19orf71	0	0	0	0	0	0	0	0	0	0
C7H1orf35	49	54	24	50	48	55	51	92	57	167
C7H5orf15	5	16	10	38	36	28	13	27	35	55
C7H5orf24	22	29	14	26	80	58	51	52	38	32
C7H5orf30	7	9	0	0	3	3	0	0	17	29
C7H5orf46	0	0	0	1	0	0	0	0	0	0
C7H5orf63	2	1	1	8	4	1	10	19	0	13
C8A	0	0	0	0	0	0	0	0	0	0
C8B	1	9	2	1	7	0	0	7	5	8
C8G	0	0	0	0	0	0	0	0	2	0
C8H8orf58	16	2	14	33	40	18	14	21	10	23
[truncated: 26,338 more rows]
