# Supplementary material for: Early transcriptional divergence underlies cell fate bias in bovine embryos
Source: Research Square preprint supplement (doi:10.21203/rs.3.rs-7028131/v1), 2025-07-14
Supplement: Supplementary file 11 [file d659386e2040d8cdc06e3777.xlsx]

## Sheet: Suppl_Fig.1_2-cell
label	SSbe	SSwe	SS	SSwe/SS
CEP192	0.301986	29.9106	30.2126	0.990005
GTF2E1	0.217604	21.5668	21.7844	0.990011
ANK3	0.154778	15.3442	15.499	0.990014
PTRHD1	0.378662	37.5474	37.926	0.990016
NEIL2	0.176775	17.5362	17.713	0.99002
GON4L	0.160326	15.9099	16.0702	0.990023
GLRX3	0.289296	28.7085	28.9978	0.990024
PHTF1	0.204014	20.294	20.498	0.990047
TMEM233	0.262793	26.163	26.4257	0.990055
PCID2	0.27118	27.0115	27.2827	0.99006
TMEM242	0.252674	25.173	25.4257	0.990062
YIPF4	0.263803	26.3044	26.5682	0.990071
TBCK	0.203513	20.294	20.4975	0.990071
INIP	0.248093	24.7487	24.9968	0.990075
CENPW	0.218734	21.8496	22.0683	0.990088
GPAT4	0.174517	17.4655	17.6401	0.990107
APPL2	0.192161	19.2333	19.4255	0.990108
NR3C2	0.167379	16.7584	16.9258	0.990111
APPL1	0.112234	11.243	11.3552	0.990116
BTAF1	0.171445	17.1827	17.3541	0.990121
RBM46	0.203828	20.4354	20.6392	0.990124
CDCA7L	0.188739	19.0212	19.2099	0.990175
CLHC1	0.183762	18.5262	18.71	0.990178
TLE6	0.274144	27.6479	27.922	0.990182
CYB5R4	0.18158	18.3141	18.4956	0.990183
TRMT1L	0.142981	14.425	14.568	0.990185
TMEM196	0.228346	23.0517	23.28	0.990191
UCHL1	0.358496	36.2039	36.5624	0.990195
HSF2BP	0.192549	19.4454	19.638	0.990195
WRB	0.350429	35.426	35.7765	0.990205
NIN	0.144063	14.5664	14.7105	0.990207
MAT2A	0.225861	22.8395	23.0654	0.990208
2024-09-01	0.191541	19.3747	19.5663	0.990211
RHOT1	0.210379	21.2839	21.4943	0.990212
DZIP3	0.174026	17.607	17.781	0.990213
CCNJ	0.117204	11.8794	11.9966	0.99023
LOC107131134	0.253057	25.668	25.921	0.990237
PPM1A	0.223478	22.6981	22.9216	0.99025
FARSB	0.331825	33.729	34.0608	0.990258
FAF2	0.202319	20.5768	20.7791	0.990263
BUD31	0.205066	20.8597	21.0647	0.990265
ZBTB10	0.277948	28.2843	28.5622	0.990269
C18H16orf70	0.208458	21.2132	21.4217	0.990269
UVRAG	0.119439	12.1622	12.2817	0.990275
PDCD6	0.263849	26.8701	27.1339	0.990276
CTPS1	0.186746	19.0212	19.2079	0.990278
POLDIP2	0.233922	23.8295	24.0634	0.990279
UBR5	0.269264	27.4357	27.705	0.990281
UFL1	0.219902	22.4153	22.6352	0.990285
PLCG2	0.210181	21.4253	21.6355	0.990285
RPL4	0.207952	21.2132	21.4212	0.990292
ATM	0.248845	25.3851	25.634	0.990292
UTP25	0.195433	19.9404	20.1358	0.990294
C20H5orf51	0.196034	20.0111	20.2072	0.990299
KIAA0753	0.214715	21.9203	22.135	0.9903
LRRC59	0.176565	18.0312	18.2078	0.990303
AP5M1	0.175824	17.9605	18.1363	0.990305
TTF1	0.237949	24.3245	24.5624	0.990312
BNIP3	0.328551	33.5876	33.9161	0.990313
BOD1	0.229178	23.4759	23.7051	0.990332
ZNF354A	0.23953	24.5366	24.7761	0.990332
MCM5	0.295033	30.2642	30.5592	0.990346
DOCK7	0.240484	24.678	24.9185	0.990349
GTF3C3	0.165365	16.9706	17.1359	0.99035
GPR137B	0.157045	16.122	16.2791	0.990353
AUNIP	0.232804	23.9002	24.133	0.990353
RPL7L1	0.232545	23.9002	24.1328	0.990364
PHB2	0.1251	12.8693	12.9944	0.990373
PPP1CA	0.24108	24.8194	25.0605	0.99038
CCSAP	0.286327	29.4864	29.7727	0.990383
LRRC40	0.205986	21.2132	21.4192	0.990383
TRNT1	0.194662	20.0818	20.2765	0.9904
CNP	0.271841	28.0721	28.344	0.990409
C2CD5	0.217958	22.5567	22.7747	0.99043
ZNF184	0.153717	15.9099	16.0636	0.990431
SIAH1	0.234109	24.2538	24.4879	0.99044
HSPE1	0.341204	35.3553	35.6965	0.990442
TUBA1B	0.307015	31.8198	32.1268	0.990444
CFAP298	0.194388	20.1525	20.3469	0.990446
SNCA	0.242055	25.1023	25.3443	0.990449
ZCRB1	0.216581	22.486	22.7026	0.99046
EIF2AK4	0.148457	15.4149	15.5634	0.990461
FANCI	0.456206	47.3762	47.8324	0.990462
CHIC2	0.222525	23.1224	23.3449	0.990468
KBTBD2	0.330632	34.3654	34.696	0.990471
TMEM184C	0.206807	21.496	21.7029	0.990471
AKIP1	0.314136	32.6683	32.9825	0.990476
DLD	0.271263	28.2136	28.4848	0.990477
SERBP1	0.198402	20.6475	20.8459	0.990482
LEF1	0.260011	27.0822	27.3422	0.990491
NUDT9	0.107918	11.243	11.3509	0.990493
TMOD2	0.269967	28.1428	28.4128	0.990498
NDUFB8	0.25084	26.163	26.4138	0.990503
SPRTN	0.150494	15.6978	15.8483	0.990504
EXOC2	0.109087	11.3844	11.4935	0.990509
DCAF5	0.13615	14.2128	14.349	0.990512
FBXO10	0.206526	21.5668	21.7733	0.990515
HHEX	0.221279	23.1224	23.3437	0.990521
CCDC43	0.218539	22.8395	23.0581	0.990522
ELMO2	0.196129	20.5061	20.7022	0.990526
SF3A1	0.228282	23.9002	24.1285	0.990539
MGC152281	0.223996	23.4759	23.6999	0.990549
POLB	0.257606	27.0115	27.2691	0.990553
CXHXorf56	0.280524	29.4156	29.6962	0.990554
RND1	0.262021	27.5065	27.7685	0.990564
SARAF	0.257952	27.0822	27.3401	0.990565
KIAA0586	0.242363	25.4558	25.6982	0.990569
AP3S1	0.180329	18.9505	19.1308	0.990574
B4GALT6	0.196389	20.6475	20.8439	0.990578
NRXN1	0.237258	24.9609	25.1981	0.990584
DNAJC13	0.192217	20.2233	20.4155	0.990585
AHR	0.302906	31.8905	32.1934	0.990591
ENOX1	0.0819037	8.6267	8.70861	0.990595
BCAS2	0.303787	32.0319	32.3357	0.990605
STXBP3	0.319856	33.729	34.0488	0.990606
APH1B	0.276591	29.2035	29.4801	0.990618
HMBOX1	0.123851	13.0815	13.2053	0.990621
PBX3	0.26429	27.9307	28.195	0.990626
MEN1	0.23405	24.7487	24.9828	0.990632
MAP4K5	0.207034	21.9203	22.1273	0.990644
LOC615112	0.174271	18.4555	18.6298	0.990646
ARMC2	0.239646	25.3851	25.6248	0.990648
EPB41L4B	0.190858	20.2233	20.4141	0.990651
CBLB	0.35701	37.8302	38.1872	0.990651
TXNRD1	0.174698	18.5262	18.7009	0.990658
MTIF2	0.221066	23.4759	23.697	0.990671
JMJD1C	0.220294	23.4052	23.6255	0.990676
RPL21	0.18501	19.6576	19.8426	0.990676
MINOS1	0.307403	32.6683	32.9757	0.990678
TRIAP1	0.332001	35.2846	35.6166	0.990678
ZSCAN26	0.246129	26.163	26.4091	0.99068
RARB	0.312632	33.234	33.5467	0.990681
PHLPP2	0.278673	29.6278	29.9064	0.990682
FNBP4	0.13747	14.6371	14.7746	0.990696
LSM7	0.294371	31.3955	31.6899	0.990711
WASHC4	0.313504	33.4462	33.7597	0.990714
TC2N	0.388344	41.4365	41.8248	0.990715
NDUFAF4	0.331297	35.3553	35.6866	0.990717
EBNA1BP2	0.233789	24.9609	25.1947	0.990721
TOE1	0.151563	16.1927	16.3443	0.990727
DARS	0.268705	28.7085	28.9772	0.990727
GPAT3	0.297803	31.8198	32.1176	0.990728
COPE	0.207116	22.1324	22.3396	0.990729
TMTC2	0.248651	26.5872	26.8359	0.990734
TP53BP1	0.163102	17.4655	17.6286	0.990748
PLK4	0.119501	12.7986	12.9181	0.990749
ANK2	0.169459	18.1726	18.3421	0.990761
ZCCHC17	0.159389	17.112	17.2714	0.990772
CEP95	0.219982	23.6174	23.8373	0.990772
GRHL3	0.176443	18.9505	19.1269	0.990775
HSD17B4	0.163234	17.5362	17.6995	0.990777
MAFG	0.268268	28.85	29.1182	0.990787
DYNLL2	0.229523	24.7487	24.9783	0.990811
PAN2	0.165816	17.8898	18.0556	0.990816
CRBN	0.243642	26.3044	26.548	0.990823
CFAP53	0.260447	28.1428	28.4033	0.99083
LNX2	0.218094	23.6174	23.8355	0.99085
SEH1L	0.248983	27.0115	27.2605	0.990867
AGMAT	0.250198	27.1529	27.4031	0.99087
USP10	0.168045	18.2434	18.4114	0.990873
FAM81A	0.265609	28.85	29.1156	0.990877
COPS3	0.21412	23.2638	23.4779	0.99088
FAM136A	0.166552	18.1019	18.2685	0.990883
TMCO1	0.241652	26.3044	26.546	0.990897
ZNF830	0.201623	21.991	22.1926	0.990915
HYPK	0.475673	51.9016	52.3773	0.990918
TCERG1	0.196163	21.4253	21.6215	0.990927
NTPCR	0.250406	27.365	27.6154	0.990932
RNF13	0.302708	33.0926	33.3953	0.990936
BUB1	0.252599	27.6479	27.9005	0.990946
GORASP2	0.249953	27.365	27.615	0.990949
ZNF574	0.148548	16.2635	16.412	0.990949
RBPJ	0.216247	23.6881	23.9043	0.990954
TSC1	0.191011	20.9304	21.1214	0.990957
PPP1R35	0.29537	32.3855	32.6809	0.990962
YWHAQ	0.224976	24.678	24.903	0.990966
LGALS3	0.243623	26.7286	26.9723	0.990968
GGPS1	0.223971	24.6073	24.8313	0.99098
LCMT2	0.179998	19.799	19.979	0.990991
TNRC6A	0.161964	17.8191	17.9811	0.990993
MYNN	0.323869	35.6382	35.9621	0.990994
ARL5B	0.166315	18.3141	18.4804	0.991
FYN	0.249563	27.5065	27.756	0.991009
ZKSCAN5	0.15642	17.2534	17.4098	0.991015
RNFT1	0.237817	26.2337	26.4715	0.991016
CDK11B	0.166627	18.3848	18.5514	0.991018
TBC1D31	0.305001	33.6583	33.9633	0.99102
CDK9	0.177416	19.5869	19.7643	0.991023
HYLS1	0.211329	23.3345	23.5459	0.991025
DRG1	0.283682	31.3248	31.6085	0.991025
DEPDC1B	0.254189	28.0721	28.3263	0.991026
THAP1	0.202327	22.3446	22.5469	0.991026
LNPK	0.189392	20.9304	21.1198	0.991032
PITRM1	0.159934	17.6777	17.8376	0.991034
TAF7	0.223163	24.678	24.9012	0.991038
GNAI3	0.252525	27.9307	28.1832	0.99104
MRPL32	0.290825	32.1734	32.4642	0.991042
HSPA14	0.197451	21.8496	22.0471	0.991044
CAPN7	0.132749	14.7078	14.8406	0.991055
ETFDH	0.187626	20.7889	20.9766	0.991055
SHLD2	0.166476	18.4555	18.622	0.99106
CDADC1	0.151067	16.7584	16.9095	0.991066
ABHD4	0.199358	22.1324	22.3318	0.991073
LRMP	0.144524	16.0513	16.1958	0.991076
C4H7orf25	0.223456	24.8194	25.0429	0.991077
ANP32B	0.29535	32.8098	33.1051	0.991078
DOPEY1	0.185149	20.5768	20.762	0.991082
LOC112447445	0.194599	21.6375	21.8321	0.991087
ACTR10	0.253491	28.2136	28.4671	0.991095
C13H20orf27	0.181061	20.1525	20.3336	0.991096
ZC3H8	0.42431	47.2347	47.659	0.991097
SUN1	0.173323	19.304	19.4773	0.991101
LOC112449302	0.232354	25.8801	26.1125	0.991102
SEC23IP	0.178365	19.8697	20.0481	0.991103
CNIH4	0.174504	19.4454	19.6199	0.991106
ERN1	0.198481	22.1324	22.3309	0.991112
RPL5	0.265516	29.6278	29.8933	0.991118
FAM19A2	0.209458	23.4052	23.6147	0.99113
TGIF1	0.384499	42.9921	43.3766	0.991136
POLE3	0.211797	23.6881	23.8999	0.991138
SNX9	0.289401	32.3855	32.6749	0.991143
MTMR2	0.176858	19.799	19.9758	0.991146
JADE3	0.201918	22.6274	22.8293	0.991155
SLC35E3	0.500912	56.1443	56.6452	0.991157
IMMT	0.138721	15.5563	15.6951	0.991161
AHCYL2	0.229431	25.7387	25.9681	0.991165
ZNF318	0.215931	24.2538	24.4697	0.991176
DPY30	0.384579	43.2749	43.6595	0.991191
CSRP2	0.552348	62.1547	62.707	0.991192
SLC35A5	0.209785	23.6174	23.8272	0.991196
CEP128	0.166377	18.7383	18.9047	0.991199
DRAP1	0.269072	30.3349	30.604	0.991208
CCDC115	0.159293	17.9605	18.1198	0.991209
SCCPDH	0.280942	31.6784	31.9593	0.991209
NAP1L4	0.151117	17.0413	17.1924	0.99121
SELENOT	0.229413	25.8801	26.1095	0.991213
SFMBT1	0.160455	18.1019	18.2624	0.991214
WDR35	0.248761	28.0721	28.3209	0.991216
POLI	0.222335	25.1023	25.3246	0.991221
FBXO8	0.258657	29.2035	29.4622	0.991221
SSH2	0.218505	24.678	24.8965	0.991223
KPNA3	0.175243	19.799	19.9742	0.991227
PDLIM1	0.240695	27.2236	27.4643	0.991236
SPIRE1	0.265621	30.052	30.3177	0.991239
PPWD1	0.192482	21.7789	21.9714	0.991239
MSH6	0.206227	23.3345	23.5408	0.99124
SSR3	0.336086	38.0423	38.3784	0.991243
MASTL	0.199251	22.5567	22.756	0.991244
OSER1	0.257761	29.2035	29.4613	0.991251
USP19	0.126631	14.3543	14.4809	0.991255
LSM11	0.255096	28.9207	29.1758	0.991257
ZFC3H1	0.198316	22.486	22.6843	0.991258
CREBBP	0.206932	23.4759	23.6829	0.991262
NUDT21	0.197509	22.4153	22.6128	0.991266
SNAPIN	0.353207	40.093	40.4462	0.991267
NSFL1C	0.145143	16.4756	16.6207	0.991267
PCGF5	0.249994	28.4257	28.6757	0.991282
EIF3CL	0.121719	13.8593	13.981	0.991294
RBM22	0.235937	26.8701	27.106	0.991296
UMAD1	0.335224	38.1838	38.519	0.991297
ZNF462	0.155809	17.7484	17.9042	0.991298
TBC1D23	0.186599	21.2839	21.4705	0.991309
CIAPIN1	0.170722	19.5161	19.6869	0.991328
ZDHHC13	0.209028	23.9002	24.1092	0.99133
TMED10	0.149609	17.112	17.2616	0.991333
IFT57	0.175491	20.0818	20.2573	0.991337
SPTLC1	0.247768	28.355	28.6027	0.991338
CALR	0.222424	25.4558	25.6783	0.991338
MLH1	0.296187	33.9411	34.2373	0.991349
ATP6V1A	0.19304	22.1324	22.3255	0.991353
ZCCHC7	0.213316	24.4659	24.6792	0.991356
DNAJA4	0.249963	28.7085	28.9585	0.991368
HEXIM2	0.195757	22.486	22.6818	0.991369
FBXO9	0.147684	16.9706	17.1182	0.991373
CYHR1	0.124896	14.3543	14.4792	0.991374
GOLPH3	0.205402	23.6174	23.8228	0.991378
CCNH	0.215209	24.7487	24.9639	0.991379
TOR1A	0.205919	23.6881	23.894	0.991382
MYCBP	0.139518	16.0513	16.1908	0.991383
TXNL4B	0.264808	30.4763	30.7411	0.991386
RSPO2	0.270849	31.1834	31.4543	0.991389
TUBD1	0.249294	28.7085	28.9578	0.991391
BET1	0.220354	25.3851	25.6055	0.991394
SAFB	0.177999	20.5061	20.6841	0.991394
RWDD2B	0.173576	20.0111	20.1847	0.991401
MED21	0.22801	26.3044	26.5324	0.991406
SLC17A5	0.168526	19.4454	19.614	0.991408
TARS	0.1739	20.0818	20.2557	0.991415
SNRNP40	0.302869	35.0018	35.3047	0.991421
ARHGEF12	0.201712	23.3345	23.5362	0.99143
BRD2	0.341746	39.598	39.9397	0.991443
PRKAG1	0.209926	24.3245	24.5344	0.991444
DNAJC2	0.192209	22.2739	22.4661	0.991444
MAEA	0.221482	25.668	25.8895	0.991445
HERPUD2	0.266538	30.9006	31.1671	0.991448
SORL1	0.185395	21.496	21.6814	0.991449
FBXO25	0.256071	29.6985	29.9546	0.991451
PUS3	0.213361	24.7487	24.9621	0.991453
ABCF1	0.184709	21.4253	21.61	0.991453
RIOX2	0.206544	23.9709	24.1775	0.991457
DDHD1	0.198597	23.0517	23.2503	0.991458
TIMELESS	0.229619	26.6579	26.8875	0.99146
CDK1	0.339721	39.4566	39.7963	0.991463
PPP4R4	0.165592	19.2333	19.3989	0.991464
ITPR1	0.175186	20.3647	20.5399	0.991471
CYFIP1	0.149583	17.3948	17.5444	0.991474
ANKRD13A	0.191449	22.2739	22.4653	0.991478
SNX14	0.123948	14.425	14.5489	0.991481
PAN3	0.24803	28.9207	29.1687	0.991497
DDX5	0.20314	23.6881	23.8912	0.991497
GRHPR	0.258772	30.1935	30.4522	0.991502
CEP85L	0.169422	19.799	19.9684	0.991516
LDHC	0.218377	25.5266	25.7449	0.991518
MMS22L	0.211025	24.678	24.8891	0.991521
FAM13A	0.146326	17.112	17.2583	0.991521
LOC509810	0.342802	40.093	40.4358	0.991522
VPS41	0.21022	24.6073	24.8175	0.991529
COA7	0.185952	21.7789	21.9648	0.991534
SNX27	0.14004	16.4049	16.5449	0.991536
NAP1L1	0.269738	31.6077	31.8774	0.991538
HAUS3	0.20448	23.9709	24.1754	0.991542
UCK1	0.119419	14.0007	14.1201	0.991543
ZFYVE1	0.216958	25.4558	25.6728	0.991549
PPP2R5C	0.243438	28.5671	28.8106	0.99155
CLTC	0.228235	26.7993	27.0276	0.991555
PRPF38A	0.21858	25.668	25.8866	0.991556
SNRPD1	0.529574	62.2254	62.755	0.991561
EDEM3	0.17269	20.294	20.4667	0.991562
PRKAA1	0.26293	30.9006	31.1635	0.991563
KLHDC1	0.152212	17.8898	18.042	0.991563
SNX16	0.347712	40.8708	41.2185	0.991564
HPRT1	0.30977	36.416	36.7258	0.991565
PPARG	0.162184	19.0678	19.23	0.991566
BAIAP2	0.246583	28.9914	29.238	0.991566
CSNK2B	0.397474	46.7398	47.1372	0.991568
RRAGC	0.224835	26.4458	26.6706	0.99157
MESD	0.213939	25.173	25.3869	0.991573
CEP83	0.198187	23.3345	23.5327	0.991578
CCDC32	0.211969	24.9609	25.1728	0.991579
ZFAND1	0.213751	25.173	25.3868	0.99158
NR2C1	0.193894	22.8395	23.0334	0.991582
QSER1	0.17484	20.6475	20.8224	0.991603
TBC1D14	0.156252	18.4555	18.6117	0.991605
WDR33	0.137664	16.2635	16.4011	0.991606
CCDC73	0.349465	41.295	41.6445	0.991608
PDIA5	0.323128	38.1838	38.5069	0.991609
PLEKHG1	0.242307	28.6378	28.8801	0.99161
MANEA	0.283499	33.5169	33.8004	0.991613
GRM8	0.26307	31.1127	31.3758	0.991615
MAU2	0.120141	14.2128	14.333	0.991618
FYB2	0.185142	21.9203	22.1055	0.991625
TDRP	0.23228	27.5065	27.7387	0.991626
GCH1	0.241791	28.6378	28.8796	0.991628
ACAP2	0.136077	16.122	16.2581	0.99163
CCDC34	0.280895	33.3047	33.5856	0.991636
PSPH	0.273527	32.4562	32.7297	0.991643
MCUB	0.257341	30.547	30.8044	0.991646
METTL6	0.222732	26.4458	26.6685	0.991648
TRAF6	0.1952	23.1931	23.3883	0.991654
DUSP19	0.253827	30.1935	30.4473	0.991663
EXOC4	0.210336	25.0316	25.2419	0.991667
ELAVL1	0.231107	27.5065	27.7376	0.991668
SLC25A13	0.148347	17.6777	17.826	0.991678
SCAMP1	0.244357	29.1328	29.3772	0.991682
RPN2	0.189327	22.6274	22.8167	0.991702
TCP1	0.186338	22.2739	22.4602	0.991704
SLC3A2	0.246587	29.4864	29.7329	0.991707
SMARCA2	0.264278	31.6077	31.872	0.991708
CBFA2T2	0.117621	14.0714	14.189	0.99171
ARFIP1	0.257509	30.8299	31.0874	0.991717
TYMS	0.768655	92.0653	92.834	0.99172
RABGEF1	0.26793	32.1026	32.3706	0.991723
ARRDC3	0.200565	24.0416	24.2422	0.991727
PTP4A1	0.223992	26.8701	27.094	0.991733
RPUSD3	0.215983	25.9508	26.1668	0.991746
SNRPE	0.276873	33.3047	33.5816	0.991755
TAB2	0.187516	22.5567	22.7442	0.991755
CYBRD1	0.41776	50.2753	50.6931	0.991759
TUBGCP5	0.14451	17.3948	17.5393	0.991761
PTPN2	0.14093	16.9706	17.1115	0.991764
SNF8	0.227148	27.365	27.5922	0.991768
PLK2	0.189838	22.9103	23.1001	0.991782
ITPA	0.217242	26.2337	26.4509	0.991787
FBXO4	0.307844	37.1938	37.5017	0.991791
SRSF11	0.197062	23.8295	24.0266	0.991798
AMFR	0.189132	22.9103	23.0994	0.991812
TM9SF1	0.26437	32.0319	32.2963	0.991814
ZMYND11	0.300774	36.4867	36.7875	0.991824
PARK7	0.236024	28.6378	28.8738	0.991826
ENTR1	0.274959	33.3754	33.6504	0.991829
KIF5C	0.149679	18.1726	18.3223	0.991831
CYB5A	0.33311	40.4465	40.7796	0.991831
PAWR	0.237504	28.85	29.0875	0.991835
SLF1	0.200221	24.3245	24.5247	0.991836
NHSL1	0.263074	31.9612	32.2243	0.991836
UTP4	0.136752	16.617	16.7538	0.991838
KDM1A	0.324689	39.4566	39.7812	0.991838
ASB3	0.262982	31.9612	32.2242	0.991839
DDX50	0.174754	21.2839	21.4587	0.991856
GOLGA3	0.209275	25.5266	25.7358	0.991868
COPZ1	0.127477	15.5563	15.6838	0.991872
CCDC15	0.183652	22.4153	22.5989	0.991873
PABPC4	0.253663	30.9713	31.2249	0.991876
BCLAF3	0.210172	25.668	25.8781	0.991878
GOT1	0.192773	23.5467	23.7394	0.99188
RASSF8	0.215689	26.3751	26.5908	0.991889
PTP4A2	0.294137	35.9917	36.2859	0.991894
VRK2	0.206129	25.2437	25.4498	0.991901
ANKRD31	0.128698	15.7685	15.8972	0.991904
ASB8	0.116974	14.3543	14.4712	0.991917
TTLL4	0.266504	32.739	33.0055	0.991925
CPEB4	0.214569	26.3751	26.5897	0.99193
SLC25A51	0.325152	40.0222	40.3474	0.991941
SNX6	0.201601	24.8194	25.021	0.991943
INTS7	0.18089	22.2739	22.4548	0.991944
BOC	0.1797	22.1324	22.3121	0.991946
ABHD17B	0.150896	18.5969	18.7478	0.991951
STX7	0.222437	27.4357	27.6582	0.991958
NUP153	0.324389	40.093	40.4173	0.991974
PNISR	0.129607	16.0513	16.1809	0.99199
PSMC2	0.220278	27.2943	27.5146	0.991994
DPM2	0.157873	19.5869	19.7447	0.992004
NDUFS1	0.2103	26.0922	26.3025	0.992005
CBL	0.219374	27.2236	27.443	0.992006
UBE2G1	0.244983	30.4056	30.6506	0.992007
ULK4	0.145813	18.1019	18.2477	0.992009
C2H2orf66	0.239084	29.6985	29.9376	0.992014
LTN1	0.22484	27.9307	28.1556	0.992014
RCAN3	0.237769	29.5571	29.7948	0.99202
SEC23B	0.218393	27.1529	27.3713	0.992021
PHIP	0.195636	24.3245	24.5201	0.992021
ZFP91	0.29827	37.1231	37.4214	0.992029
LIPA	0.17156	21.3546	21.5262	0.99203
KNTC1	0.27751	34.6482	34.9257	0.992054
TMEM267	0.229933	28.7085	28.9385	0.992054
GMNN	0.287635	35.921	36.2087	0.992056
IARS	0.182867	22.8395	23.0224	0.992057
SMIM14	0.243834	30.4763	30.7201	0.992063
INTS12	0.379564	47.4469	47.8264	0.992064
CPNE1	0.12218	15.2735	15.3957	0.992064
RPL7A	0.201806	25.2437	25.4455	0.992069
ABHD10	0.255811	32.0319	32.2877	0.992077
ZRSR2	0.241689	30.2642	30.5059	0.992077
GLMN	0.249362	31.2541	31.5035	0.992085
SEC22B	0.230726	28.9207	29.1514	0.992085
IFT74	0.176511	22.1324	22.309	0.992088
PPP1CC	0.195668	24.5366	24.7323	0.992089
INO80D	0.147587	18.5262	18.6738	0.992097
ERCC6L2	0.204869	25.7387	25.9436	0.992103
LRR1	0.216108	27.1529	27.369	0.992104
NLRP5	0.25381	31.8905	32.1443	0.992104
FAM118B	0.279082	35.0725	35.3516	0.992106
COMMD8	0.238002	29.9106	30.1486	0.992106
SERINC3	0.162521	20.4354	20.5979	0.99211
C15H11orf16	0.147197	18.5262	18.6734	0.992117
TRIM36	0.197652	24.8902	25.0878	0.992122
DDX55	0.159891	20.1525	20.3124	0.992128
IFRD1	0.210087	26.5165	26.7266	0.992139
GLE1	0.175275	22.1324	22.3077	0.992143
OCIAD1	0.235104	29.6985	29.9336	0.992146
MNS1	0.205945	26.0215	26.2275	0.992148
KCNN3	0.181708	22.981	23.1627	0.992155
BCAP29	0.235871	29.8399	30.0758	0.992157
FANK1	0.405408	51.336	51.7414	0.992165
KAT7	0.164152	20.7889	20.9531	0.992166
SHQ1	0.155583	19.7283	19.8839	0.992175
BUD13	0.198996	25.2437	25.4427	0.992179
CSNK1G1	0.164943	20.9304	21.0953	0.992181
ZWILCH	0.179895	22.8395	23.0194	0.992185
SLF2	0.209864	26.6579	26.8678	0.992189
LOC788599	0.165601	21.0718	21.2374	0.992202
EP300	0.241158	30.6884	30.9296	0.992203
AZIN1	0.194471	24.7487	24.9432	0.992203
HSPH1	0.246308	31.3955	31.6418	0.992216
COL4A3BP	0.125817	16.0513	16.1771	0.992223
MAD2L2	0.315919	40.3051	40.621	0.992223
DZIP1	0.173378	22.1324	22.3058	0.992227
C20H5orf22	0.236431	30.1935	30.4299	0.99223
KIF3C	0.156567	20.0111	20.1677	0.992237
DNAJB6	0.167988	21.496	21.664	0.992246
SORBS1	0.238341	30.547	30.7854	0.992258
BAZ2A	0.128342	16.4756	16.6039	0.99227
EXOC6	0.187278	24.0416	24.2289	0.99227
UBE4A	0.154129	19.799	19.9531	0.992275
ATXN3	0.210813	27.0822	27.293	0.992276
KARS	0.214104	27.5065	27.7206	0.992276
MGST2	0.133699	17.1827	17.3164	0.992279
MTMR7	0.270265	34.7897	35.0599	0.992291
ARL2BP	0.174631	22.486	22.6606	0.992294
ABCB1	0.189896	24.4659	24.6558	0.992298
MCM7	0.16235	20.9304	21.0927	0.992303
ASTL	0.33586	43.3456	43.6815	0.992311
HIST2H2BF	0.252945	32.6683	32.9213	0.992317
C5H12orf45	0.235546	30.4763	30.7118	0.99233
HECTD1	0.201993	26.163	26.3649	0.992339
RNF145	0.130894	16.9706	17.1015	0.992346
KIN	0.13359	17.3241	17.4577	0.992348
PGM2L1	0.252284	32.739	32.9913	0.992353
C17H4orf33	0.307824	39.9515	40.2594	0.992354
DCK	0.218464	28.355	28.5734	0.992354
CCNI2	0.200261	26.0215	26.2218	0.992363
ANKLE2	0.106107	13.7886	13.8947	0.992364
RPA2	0.258442	33.5876	33.846	0.992364
TOMM7	0.280048	36.416	36.696	0.992368
TYW1	0.252888	32.9512	33.2041	0.992384
ZMAT2	0.181731	23.6881	23.8698	0.992387
RPN1	0.264057	34.4361	34.7002	0.99239
MTMR12	0.150089	19.5869	19.7369	0.992396
PLCH1	0.155966	20.3647	20.5206	0.9924
VCL	0.183462	23.9709	24.1544	0.992405
DCAF12	0.142829	18.6676	18.8104	0.992407
EIF3J	0.169516	22.2032	22.3727	0.992423
STIL	0.189985	24.8902	25.0801	0.992425
B4GALT5	0.202642	26.5872	26.7899	0.992436
JAM3	0.193665	25.4558	25.6495	0.99245
SSR1	0.151671	19.9404	20.0921	0.992451
PDS5A	0.20867	27.4357	27.6444	0.992452
FAM50A	0.230714	30.3349	30.5656	0.992452
CAMTA1	0.266659	35.0725	35.3392	0.992454
HIP1	0.140503	18.5262	18.6667	0.992473
UGP2	0.270012	35.6382	35.9082	0.99248
SNAPC2	0.121594	16.0513	16.1729	0.992482
WDR12	0.185834	24.5366	24.7224	0.992483
CCDC146	0.216674	28.6378	28.8545	0.992491
HOOK1	0.162638	21.496	21.6587	0.992491
LSG1	0.174289	23.0517	23.226	0.992496
LRIG3	0.204205	27.0822	27.2864	0.992516
DESI1	0.170072	22.5567	22.7268	0.992517
LIG4	0.174776	23.1931	23.3679	0.992521
TDRD5	0.209378	27.7893	27.9987	0.992522
YEATS4	0.150753	20.0111	20.1619	0.992523
TMEM168	0.164357	21.8496	22.014	0.992534
HAS2	0.198755	26.4458	26.6445	0.99254
WISP3	0.108871	14.4957	14.6046	0.992545
CNTRL	0.173572	23.1224	23.296	0.992549
RALY	0.170896	22.7688	22.9397	0.99255
ERBIN	0.194747	25.9508	26.1456	0.992551
CHCHD2	0.362913	48.4368	48.7997	0.992563
TROAP	0.251401	33.5876	33.839	0.992571
AURKB	0.21276	28.4257	28.6385	0.992571
GTF2H3	0.28648	38.3252	38.6117	0.99258
DCP1A	0.19122	25.5973	25.7885	0.992585
RAN	0.275155	36.8403	37.1154	0.992586
TIGAR	0.252939	33.8704	34.1234	0.992588
ARL1	0.116594	15.6271	15.7437	0.992594
ZW10	0.172459	23.1224	23.2949	0.992597
CMC1	0.26683	35.7796	36.0464	0.992598
SAFB2	0.164331	22.0617	22.2261	0.992606
EIF3A	0.193935	26.0922	26.2862	0.992622
HEY1	0.165485	22.2739	22.4393	0.992625
HERC3	0.150207	20.2233	20.3735	0.992627
MAD2L1BP	0.181704	24.4659	24.6476	0.992628
PPID	0.274632	36.9817	37.2563	0.992629
AADAT	0.146201	19.7283	19.8745	0.992644
LOC100299025	0.204243	27.5772	27.7814	0.992648
STRAP	0.238204	32.1734	32.4116	0.992651
PCDHGA2	0.282341	38.1505	38.4329	0.992654
TMEM183A	0.182103	24.6073	24.7894	0.992654
CHAMP1	0.244329	33.0219	33.2662	0.992655
NIP7	0.143332	19.3747	19.5181	0.992656
UBE2A	0.215986	29.2035	29.4195	0.992658
CHRAC1	0.274513	37.1231	37.3976	0.99266
ESCO1	0.143231	19.3747	19.518	0.992662
NIPSNAP2	0.297694	40.3051	40.6028	0.992668
ELOVL5	0.133128	18.0312	18.1644	0.992671
MPHOSPH10	0.167045	22.6274	22.7945	0.992672
PUM3	0.223837	30.3349	30.5587	0.992675
QTRT2	0.11041	14.9907	15.1011	0.992689
PTGR2	0.243153	33.0219	33.265	0.99269
TBC1D8	0.187606	25.5266	25.7142	0.992704
PIK3C2A	0.268654	36.5574	36.8261	0.992705
MAP3K13	0.134991	18.3848	18.5198	0.992711
C8H9orf72	0.257968	35.1432	35.4012	0.992713
TTC3	0.152399	20.7889	20.9413	0.992723
CD58	0.227479	31.042	31.2695	0.992725
ATE1	0.163694	22.3446	22.5083	0.992727
MRPL18	0.301989	41.2243	41.5263	0.992728
UNC119	0.462277	63.1446	63.6069	0.992732
USP44	0.18681	25.5266	25.7134	0.992735
ZNF226	0.365786	49.9924	50.3582	0.992736
TAMM41	0.207969	28.4257	28.6337	0.992737
VAPA	0.681982	93.2674	93.9494	0.992741
STYX	0.2392	32.739	32.9782	0.992747
CDK2	0.150802	20.6475	20.7983	0.992749
PSEN1	0.231353	31.6784	31.9097	0.99275
GLUD1	0.265404	36.3453	36.6107	0.992751
HELZ	0.144052	19.7283	19.8723	0.992751
LOC511229	0.13215	18.1019	18.2341	0.992753
NUDC	0.191955	26.3044	26.4963	0.992755
ARF5	0.326411	44.7599	45.0863	0.99276
NCOA2	0.22818	31.3248	31.553	0.992768
DAZAP2	0.162187	22.2739	22.4361	0.992771
RALGAPA1	0.159023	21.8496	22.0086	0.992775
TSPAN7	0.321472	44.1942	44.5156	0.992778
FAM221A	0.271	37.2645	37.5355	0.99278
ZNF529	0.292722	40.3051	40.5978	0.99279
ATG14	0.170466	23.4759	23.6464	0.992791
MGAT4A	0.222787	30.6884	30.9112	0.992793
METTL8	0.1272	17.5362	17.6634	0.992799
DLG1	0.228722	31.537	31.7657	0.9928
PEBP1	0.238928	32.9512	33.1901	0.992801
FAM160A2	0.120465	16.617	16.7375	0.992803
MOB4	0.183925	25.3851	25.5691	0.992807
SPATS2	0.234627	32.3855	32.6201	0.992807
CCDC6	0.177756	24.5366	24.7144	0.992808
RPGRIP1L	0.222257	30.6884	30.9107	0.99281
ASF1A	0.241471	33.3754	33.6169	0.992817
GDF3	0.203042	28.0721	28.2752	0.992819
CDC42	0.203951	28.2136	28.4175	0.992823
SCAMP2	0.123692	17.112	17.2357	0.992823
PPAN	0.274397	37.9716	38.246	0.992825
NUP155	0.260984	36.1332	36.3941	0.992829
THOC5	0.220091	30.4763	30.6964	0.99283
RUFY2	0.269443	37.3352	37.6047	0.992835
UBA3	0.178966	24.8194	24.9984	0.992841
TRA2A	0.191697	26.5872	26.7789	0.992841
CYFIP2	0.163584	22.6981	22.8617	0.992845
OFD1	0.152849	21.2132	21.3661	0.992846
IVNS1ABP	0.187889	26.0922	26.2801	0.992851
C1D	0.263721	36.6281	36.8919	0.992851
ZNF814	0.149985	20.8597	21.0096	0.992861
PSMD14	0.220643	30.6884	30.9091	0.992862
PIK3CB	0.127512	17.7484	17.8759	0.992867
TBCB	0.306998	42.78	43.087	0.992875
FGD4	0.16162	22.5567	22.7183	0.992886
PHC3	0.152912	21.3546	21.5075	0.99289
CDC42SE1	0.163991	22.9103	23.0743	0.992893
MTMR6	0.171555	23.9709	24.1425	0.992894
ATG3	0.188595	26.3751	26.5637	0.9929
SLC4A7	0.110584	15.4856	15.5962	0.99291
GNAI1	0.264588	37.0524	37.317	0.99291
DYNLT1	0.44065	61.7304	62.1711	0.992912
TMF1	0.200846	28.1428	28.3437	0.992914
NUP37	0.352378	49.4268	49.7791	0.992921
KCMF1	0.179648	25.2437	25.4234	0.992934
ZNF197	0.113706	15.9806	16.0943	0.992935
DNAJC11	0.138337	19.4454	19.5838	0.992936
TFB1M	0.237418	33.3754	33.6129	0.992937
GJA4	0.285627	40.1637	40.4493	0.992939
DDX18	0.23119	32.5269	32.7581	0.992943
COBLL1	0.223972	31.537	31.7609	0.992948
QRICH1	0.218365	30.7591	30.9775	0.992951
NOLC1	0.144954	20.4354	20.5803	0.992957
PTPRA	0.103315	14.5664	14.6697	0.992957
INPP5B	0.199058	28.0721	28.2712	0.992959
CELF1	0.279454	39.4566	39.736	0.992967
CHORDC1	0.185801	26.2337	26.4195	0.992967
HMGXB4	0.162263	22.9103	23.0725	0.992967
SH3GL1	0.200705	28.355	28.5557	0.992971
ATP5F1C	0.285404	40.3758	40.6612	0.992981
ERCC4	0.1959	27.7186	27.9145	0.992982
ABRAXAS2	0.146883	20.7889	20.9358	0.992984
ATP6V0D1	0.155861	22.0617	22.2176	0.992985
PSMC4	0.204313	28.9207	29.125	0.992985
SRSF4	0.163824	23.1931	23.3569	0.992986
LARP7	0.306872	43.4871	43.7939	0.992993
MGAT5	0.220971	31.3248	31.5458	0.992995
ARID5B	0.28731	40.7294	41.0167	0.992995
TMED9	0.0912064	12.9401	13.0313	0.993001
HAL	0.230728	32.739	32.9698	0.993002
ZC3H15	0.274228	38.9616	39.2358	0.993011
SYNCRIP	0.160241	22.7688	22.9291	0.993011
PPIA	0.401774	57.1342	57.536	0.993017
UBQLN1	0.145968	20.7889	20.9349	0.993028
THOC2	0.240301	34.224	34.4643	0.993028
HDAC3	0.223246	31.8198	32.0431	0.993033
GPATCH8	0.187858	26.7993	26.9872	0.993039
DCUN1D5	0.282765	40.3758	40.6586	0.993045
NHLRC2	0.146953	21.0011	21.148	0.993051
SSH1	0.316098	45.1841	45.5002	0.993053
PINX1	0.155591	22.2739	22.4295	0.993063
ARID2	0.170869	24.4659	24.6368	0.993064
PCBP1	0.200951	28.7792	28.9802	0.993066
SSU72	0.25227	36.1332	36.3854	0.993067
SMC6	0.174727	25.0316	25.2063	0.993068
CKAP2L	0.262021	37.5474	37.8094	0.99307
TPST1	0.213024	30.547	30.76	0.993075
LOC100848906	0.136068	19.5161	19.6522	0.993076
HNRNPK	0.245503	35.2139	35.4594	0.993077
DCUN1D1	0.264394	37.9716	38.236	0.993085
FBXO15	0.206293	29.6278	29.8341	0.993085
ZRANB2	0.172801	24.8194	24.9922	0.993086
SECISBP2	0.158907	22.8395	22.9985	0.993091
LOC101906565	0.188912	27.1529	27.3418	0.993091
TRMT6	0.268203	38.608	38.8762	0.993101
RANBP9	0.324863	46.8105	47.1353	0.993108
GTF2B	0.381769	55.0129	55.3947	0.993108
DNM1L	0.217859	31.3955	31.6134	0.993109
THOC7	0.174991	25.2437	25.4187	0.993116
UTP23	0.264551	38.2545	38.519	0.993132
PFDN6	0.154787	22.4153	22.5701	0.993142
ZNF518A	0.161564	23.4052	23.5668	0.993144
MYO5B	0.181557	26.3044	26.4859	0.993145
SPCS2	0.225473	32.6683	32.8938	0.993145
KATNB1	0.24011	34.7897	35.0298	0.993146
EIF2S1	0.197139	28.5671	28.7643	0.993146
FNDC3B	0.18052	26.163	26.3435	0.993147
SOHLH2	0.449221	65.1245	65.5738	0.993149
DSN1	0.175099	25.3851	25.5602	0.99315
PHF6	0.176035	25.5266	25.7026	0.993151
RASGEF1A	0.1618	23.4759	23.6377	0.993155
ZGLP1	0.223653	32.4562	32.6799	0.993156
LTBP1	0.180714	26.2337	26.4144	0.993158
SELENBP1	0.364632	52.9623	53.3269	0.993162
LOC112446824	0.189343	27.5065	27.6958	0.993163
CLGN	0.214605	31.1834	31.398	0.993165
ATXN7L1	0.216497	31.4663	31.6827	0.993167
UBE2L3	0.192139	27.9307	28.1229	0.993168
NEK2	0.286642	41.7193	42.0059	0.993176
HMGXB3	0.24625	35.8503	36.0966	0.993178
MTFR2	0.103337	15.0614	15.1647	0.993186
TOR2A	0.217816	31.7491	31.9669	0.993186
NOB1	0.233705	34.0825	34.3163	0.99319
ATF6	0.164303	23.9709	24.1352	0.993192
AMPD3	0.242326	35.3553	35.5977	0.993193
GGCT	0.229226	33.4462	33.6754	0.993193
PDE6D	0.280571	40.9415	41.2221	0.993194
CHMP3	0.251041	36.6988	36.9499	0.993206
SWAP70	0.154219	22.5567	22.7109	0.993209
ZFX	0.22237	32.5269	32.7493	0.99321
NFRKB	0.18176	26.5872	26.769	0.99321
MKI67	0.15606	22.8395	22.9956	0.993213
UBL5	0.371949	54.4472	54.8192	0.993215
ENAH	0.230411	33.729	33.9594	0.993215
TBRG1	0.226962	33.234	33.461	0.993217
RAB2B	0.308458	45.1841	45.4926	0.99322
BIRC5	0.233584	34.224	34.4576	0.993221
ENTPD4	0.163716	24.0416	24.2053	0.993236
GTPBP1	0.167568	24.6073	24.7749	0.993236
NUDT4	0.166761	24.5366	24.7034	0.993249
PJA2	0.209466	30.8299	31.0393	0.993252
MSH2	0.161946	23.9002	24.0622	0.99327
RALBP1	0.281127	41.5072	41.7883	0.993273
RAB3IP	0.259836	38.3959	38.6557	0.993278
RLIM	0.153517	22.6981	22.8516	0.993282
ESYT1	0.240942	35.6382	35.8791	0.993285
PCGF6	0.155838	23.0517	23.2075	0.993285
BECN1	0.169464	25.1023	25.2718	0.993294
LCOR	0.140806	20.8597	21.0005	0.993295
HIBADH	0.202765	30.052	30.2548	0.993298
SERF2	0.475943	70.5693	71.0452	0.993301
USP36	0.180205	26.7286	26.9088	0.993303
CCDC59	0.133339	19.799	19.9323	0.99331
CCDC50	0.183288	27.2236	27.4069	0.993312
FAM149A	0.237973	35.3553	35.5933	0.993314
UNC50	0.23702	35.2139	35.4509	0.993314
TLN2	0.256805	38.1838	38.4406	0.993319
ACTR6	0.263576	39.2444	39.508	0.993329
CCDC25	0.106698	15.9099	16.0166	0.993338
NME2	0.231873	34.5775	34.8094	0.993339
EMC3	0.111424	16.617	16.7284	0.993339
EYA1	0.176741	26.3751	26.5518	0.993344
ENSA	0.227889	34.0118	34.2397	0.993344
ARL15	0.182373	27.2236	27.406	0.993345
ITCH	0.229158	34.2947	34.5238	0.993362
TMBIM4	0.218575	32.739	32.9576	0.993368
NKAP	0.112349	16.8291	16.9415	0.993368
WASL	0.151028	22.6274	22.7784	0.99337
EPS15	0.138632	20.7889	20.9276	0.993376
VEZF1	0.134714	20.2233	20.358	0.993383
NAA50	0.216168	32.4562	32.6724	0.993384
NDEL1	0.179429	26.9408	27.1202	0.993384
SLC16A1	0.205754	30.9006	31.1063	0.993385
ZMPSTE24	0.228725	34.3654	34.5941	0.993388
SF3B3	0.13504	20.294	20.429	0.99339
ARNTL	0.161373	24.2538	24.4151	0.99339
FGD6	0.24219	36.416	36.6582	0.993393
PKM	0.172272	25.9508	26.1231	0.993405
AACS	0.213494	32.1734	32.3869	0.993408
DCLRE1C	0.117277	17.6777	17.7949	0.99341
SLC7A6	0.133186	20.0818	20.215	0.993412
ZNF436	0.0961094	14.4957	14.5918	0.993413
ARAP2	0.15375	23.1931	23.3469	0.993415
SLC7A2	0.139682	21.0718	21.2115	0.993415
PTGES3	0.181245	27.365	27.5463	0.99342
UBE2H	0.211843	32.0319	32.2438	0.99343
MAP1LC3B	0.236578	35.7796	36.0162	0.993431
GTF2A1L	0.220561	33.3754	33.596	0.993435
SLAIN2	0.187266	28.355	28.5422	0.993439
TGFBR3	0.151751	22.981	23.1327	0.99344
NUP205	0.124632	18.8798	19.0044	0.993442
ZFP69	0.123251	18.6726	18.7958	0.993443
FKBP5	0.161475	24.4659	24.6274	0.993443
EPB41L4A	0.128779	19.5161	19.6449	0.993445
TEX10	0.228141	34.5775	34.8057	0.993445
ELOC	0.377628	57.3464	57.724	0.993458
RTN3	0.190768	28.9914	29.1821	0.993463
ZRANB3	0.294516	44.7599	45.0544	0.993463
RPSA	0.445826	67.8823	68.3281	0.993475
HMG20A	0.125345	19.0919	19.2172	0.993477
SPCS3	0.209285	31.8905	32.0998	0.99348
ATF1	0.170279	25.9508	26.1211	0.993481
ZNF143	0.186517	28.4257	28.6122	0.993481
ATF4	0.170258	25.9508	26.1211	0.993482
CRLF3	0.174367	26.5872	26.7616	0.993484
P4HB	0.175675	26.7993	26.975	0.993487
FBXO3	0.184714	28.2136	28.3983	0.993496
C8H9orf64	0.156005	23.8295	23.9855	0.993496
USP25	0.24486	37.4059	37.6508	0.993497
OR4S1	0.30859	47.164	47.4726	0.9935
C23H6orf89	0.108174	16.5463	16.6545	0.993505
BRIP1	0.212127	32.4562	32.6683	0.993507
ABCB10	0.198139	30.3349	30.533	0.993511
TBCE	0.232565	35.6382	35.8707	0.993517
NFXL1	0.178456	27.365	27.5435	0.993521
NKAPD1	0.137707	21.1425	21.2802	0.993529
VDAC3	0.234876	36.0624	36.2973	0.993529
USO1	0.170704	26.2337	26.4044	0.993535
BUD23	0.256902	39.5273	39.7842	0.993543
DMD	0.207443	31.9612	32.1687	0.993551
MED1	0.096225	14.8492	14.9455	0.993562
CCNYL1	0.186218	28.7792	28.9655	0.993571
FASTKD5	0.190903	29.5161	29.707	0.993574
STT3A	0.301523	46.669	46.9706	0.993581
SYNRG	0.174249	27.0115	27.1857	0.99359
EXOSC8	0.237189	36.7696	37.0067	0.993591
MCF2	0.260867	40.4465	40.7074	0.993592
RABEP1	0.192324	29.8399	30.0322	0.993596
C24H18orf25	0.122119	18.9505	19.0726	0.993597
ELMOD2	0.188619	29.2742	29.4628	0.993598
VCP	0.161684	25.1023	25.264	0.9936
HELQ	0.198945	30.9006	31.0995	0.993603
PPP6R3	0.224729	34.9311	35.1558	0.993608
TAOK1	0.230185	35.7796	36.0098	0.993608
PCMTD1	0.136442	21.2132	21.3496	0.993609
ZCCHC14	0.23756	36.9817	37.2192	0.993617
SGTA	0.191606	29.8399	30.0315	0.99362
CNBP	0.393074	61.2354	61.6285	0.993622
ENDOV	0.10029	15.6271	15.7273	0.993623
CDK5RAP1	0.146799	22.9103	23.0571	0.993633
CLIP1	0.105998	16.5463	16.6523	0.993635
ZGRF1	0.166319	26.0215	26.1878	0.993649
MYL12A	0.296332	46.3862	46.6825	0.993652
MOSPD1	0.357225	55.9321	56.2894	0.993654
RPL26L1	0.296089	46.3862	46.6823	0.993657
RAB27A	0.20997	32.9512	33.1611	0.993668
PSMG1	0.267972	42.0729	42.3408	0.993671
NDUFAB1	0.319246	50.1339	50.4531	0.993672
KIF22	0.189115	29.6985	29.8876	0.993672
LRRC8A	0.155752	24.4659	24.6216	0.993674
DBR1	0.236836	37.2645	37.5014	0.993685
TMEM131L	0.238566	37.5474	37.7859	0.993686
RFWD3	0.132886	20.9304	21.0632	0.993691
TIPRL	0.17848	28.1428	28.3213	0.993698
GPBP1L1	0.163221	25.7387	25.9019	0.993698
MTERF4	0.154112	24.3245	24.4786	0.993704
TESC	0.26378	41.6486	41.9124	0.993706
TRAPPC2	0.247495	39.103	39.3505	0.993711
NSMCE4A	0.496231	78.4181	78.9144	0.993712
RBM45	0.127493	20.1525	20.28	0.993713
SAMD12	0.205304	32.4562	32.6615	0.993714
NACA	0.331985	52.538	52.87	0.993721
SLC25A16	0.154079	24.3952	24.5493	0.993724
TXNDC9	0.370012	58.6192	58.9892	0.993727
FOXJ3	0.181726	28.85	29.0317	0.99374
EIF1B	0.309278	49.1439	49.4532	0.993746
LANCL1	0.251744	40.0222	40.274	0.993749
PAICS	0.252878	40.2344	40.4873	0.993754
FAM107B	0.283966	45.1841	45.4681	0.993755
JPT2	0.168329	26.7993	26.9677	0.993758
SHC1	0.202653	32.3855	32.5881	0.993781
PRPS2	0.145129	23.1931	23.3382	0.993781
ENTPD5	0.235639	37.6888	37.9244	0.993787
FSBP	0.209531	33.5169	33.7264	0.993787
LOC104968411	0.172209	27.5772	27.7494	0.993794
ILF3	0.120085	19.2333	19.3534	0.993795
TBC1D15	0.353563	56.6393	56.9928	0.993796
UBE2V2	0.231216	37.0524	37.2836	0.993798
XPO5	0.13104	21.0011	21.1321	0.993799
PRELID3A	0.134201	21.5668	21.701	0.993816
SLC35A3	0.196566	31.6077	31.8042	0.99382
HIGD1A	0.221902	35.7089	35.9308	0.993824
LRP6	0.187373	30.1935	30.3808	0.993833
PBDC1	0.33825	54.5179	54.8562	0.993834
SRRM2	0.202411	32.6683	32.8707	0.993842
TERB1	0.23252	37.5474	37.7799	0.993845
TMED4	0.288765	46.669	46.9578	0.993851
SAP130	0.184981	29.9106	30.0956	0.993854
CPSF2	0.142421	23.0517	23.1941	0.99386
DAD1	0.213836	34.6482	34.8621	0.993866
SRP14	0.349952	56.71	57.0599	0.993867
MTMR3	0.199605	32.3855	32.5851	0.993874
UBE2Q1	0.173715	28.2136	28.3873	0.993881
XPOT	0.179371	29.1328	29.3122	0.993881
FANCL	0.259653	42.2143	42.4739	0.993887
DHX58	0.226479	36.911	37.1375	0.993902
TPK1	0.203379	33.1633	33.3667	0.993905
TOPBP1	0.130276	21.2839	21.4142	0.993916
TRIM37	0.166182	27.1529	27.3191	0.993917
MCPH1	0.113765	18.5969	18.7107	0.99392
HMGB3	0.215027	35.2139	35.4289	0.993931
TAF2	0.116569	19.0919	19.2085	0.993931
USP16	0.213497	35.0018	35.2153	0.993937
FABP3	0.379501	62.2254	62.6049	0.993938
MCM3	0.126926	20.8597	20.9866	0.993952
ATP5F1B	0.205462	33.7997	34.0052	0.993958
RSF1	0.185291	30.547	30.7323	0.993971
ERCC5	0.168497	27.7893	27.9578	0.993973
UTP6	0.142908	23.6174	23.7603	0.993985
ATL3	0.156844	25.9508	26.1077	0.993992
TAF3	0.239306	39.598	39.8373	0.993993
PGGT1B	0.124241	20.5768	20.701	0.993998
XPR1	0.107447	17.8191	17.9265	0.994006
COPS4	0.278832	46.2448	46.5236	0.994007
USP46	0.153684	25.5266	25.6802	0.994015
KIF24	0.133673	22.2032	22.3368	0.994016
BRWD1	0.138088	22.981	23.1191	0.994027
TSTD2	0.1961	32.6683	32.8644	0.994033
FN3KRP	0.193538	32.2441	32.4376	0.994034
FAM120B	0.110728	18.4555	18.5662	0.994036
KCTD13	0.244281	40.7294	40.9736	0.994038
CSE1L	0.186597	31.1127	31.2993	0.994038
KNL1	0.275818	46.0327	46.3085	0.994044
TRIM24	0.205044	34.224	34.429	0.994044
DDX20	0.158801	26.5165	26.6753	0.994047
TSPAN13	0.300503	50.2046	50.5051	0.99405
TFB2M	0.214837	35.921	36.1359	0.994055
PSMD2	0.176206	29.4864	29.6626	0.99406
RSPRY1	0.138977	23.2638	23.4028	0.994061
ERMP1	0.356273	59.8212	60.1775	0.99408
ZUP1	0.18645	31.3248	31.5113	0.994083
GINS4	0.193037	32.4562	32.6492	0.994088
SEC61A1	0.145452	24.4659	24.6113	0.99409
FAM208A	0.207612	34.9311	35.1387	0.994092
SASS6	0.192742	32.4562	32.6489	0.994097
LOC100848540	0.261356	44.0528	44.3141	0.994102
RABGAP1L	0.218887	36.911	37.1299	0.994105
PPP4R2	0.246781	41.6486	41.8954	0.99411
ABCE1	0.256023	43.2749	43.531	0.994119
SEPHS2	0.186062	31.4663	31.6523	0.994122
PHF20	0.166695	28.2136	28.3803	0.994126
MRPS35	0.19048	32.2441	32.4345	0.994127
EXTL2	0.19934	33.7997	33.999	0.994137
CCDC93	0.149783	25.4558	25.6056	0.99415
CEP57L1	0.238603	40.5879	40.8265	0.994156
PPP4R1	0.12927	21.991	22.1203	0.994156
AGBL2	0.209039	35.5675	35.7765	0.994157
TSEN15	0.132918	22.6274	22.7603	0.99416
SLC25A44	0.167187	28.4964	28.6636	0.994167
ZMYND8	0.150863	25.7387	25.8895	0.994173
YTHDF3	0.100259	17.112	17.2122	0.994175
EFL1	0.180161	30.7591	30.9393	0.994177
COPS2	0.218516	37.3352	37.5538	0.994181
HNRNPA2B1	0.249918	42.7092	42.9592	0.994182
CFAP20	0.24899	42.5678	42.8168	0.994185
EXOSC3	0.130902	22.4153	22.5462	0.994194
WDR41	0.20346	34.8604	35.0638	0.994197
SAR1A	0.154251	26.4458	26.6	0.994201
ATG5	0.206834	35.4968	35.7036	0.994207
HSPD1	0.128129	21.991	22.1191	0.994207
CHUK	0.192356	33.0219	33.2142	0.994209
INTS2	0.179545	30.8299	31.0094	0.99421
LOC514189	0.236204	40.5879	40.8241	0.994214
ZNF292	0.101603	17.4655	17.5671	0.994216
THOC1	0.25247	43.4164	43.6688	0.994219
STRN	0.229806	39.5273	39.7571	0.99422
HMGN4	0.228527	39.3151	39.5437	0.994221
BRAP	0.152432	26.2337	26.3861	0.994223
SLC1A5	0.29004	49.9217	50.2118	0.994224
RAD51AP1	0.233266	40.1637	40.3969	0.994226
RPL15	0.148219	25.5266	25.6748	0.994227
SRFBP1	0.176851	30.4763	30.6532	0.994231
EPSTI1	0.297435	51.336	51.6334	0.994239
FAM214A	0.206265	35.6382	35.8444	0.994246
ILDR1	0.164897	28.4964	28.6613	0.994247
POLR1B	0.20368	35.2139	35.4176	0.994249
TIMM13	0.234752	40.5879	40.8227	0.994249
WDR92	0.170819	29.5571	29.7279	0.994254
PLEKHG7	0.174349	30.1935	30.3678	0.994259
NSF	0.191752	33.234	33.4258	0.994263
EIF4A3	0.302284	52.3966	52.6989	0.994264
NFYB	0.285385	49.4975	49.7829	0.994267
NRDC	0.144704	25.1023	25.247	0.994268
EPB41L5	0.250436	43.5578	43.8082	0.994283
TMEM50B	0.136145	23.6881	23.8242	0.994285
FKBP1A	0.209621	36.4867	36.6963	0.994288
DPH3	0.140141	24.3952	24.5353	0.994288
PDLIM5	0.121001	21.0718	21.1928	0.99429
IPO11	0.164413	28.7085	28.8729	0.994306
CSNK1A1	0.110057	19.2333	19.3434	0.99431
CYB5B	0.205064	35.8503	36.0554	0.994313
HELB	0.157088	27.5065	27.6635	0.994321
PCNP	0.173383	30.4056	30.579	0.99433
SCAPER	0.173193	30.4763	30.6495	0.994349
DHX40	0.0983709	17.3241	17.4225	0.994354
SOCS4	0.161252	28.4257	28.5869	0.994359
TDP1	0.174888	30.8299	31.0047	0.994359
GTF3C2	0.15911	28.0721	28.2312	0.994364
SKA3	0.18714	33.0219	33.209	0.994365
RFK	0.202293	35.7089	35.9112	0.994367
TSR1	0.153813	27.1529	27.3067	0.994367
CTSB	0.191829	33.8704	34.0622	0.994368
MYH15	0.211312	37.3352	37.5466	0.994372
M6PR	0.157056	27.7893	27.9464	0.99438
KDM1B	0.276472	48.9318	49.2083	0.994382
SLC44A5	0.188507	33.3754	33.5639	0.994384
USP9X	0.274541	48.6489	48.9235	0.994388
SH3BGRL2	0.164947	29.2742	29.4392	0.994397
HDAC1	0.145801	25.8801	26.0259	0.994398
EIF3E	0.295489	52.4673	52.7628	0.9944
PAPD7	0.160453	28.4964	28.6569	0.994401
TM9SF3	0.163146	28.9914	29.1545	0.994404
LSM14A	0.160307	28.4964	28.6567	0.994406
WDR26	0.305321	54.3058	54.6111	0.994409
SPCS1	0.210739	37.5474	37.7581	0.994419
EPC1	0.165723	29.5571	29.7228	0.994424
MPIG6B	0.247706	44.1942	44.4419	0.994426
SLC8A1	0.221842	39.598	39.8198	0.994429
SDAD1	0.144772	25.8801	26.0249	0.994437
RBM4B	0.189799	33.9411	34.1309	0.994439
CASTOR1	0.250262	44.7599	45.0101	0.99444
METAP2	0.166044	29.6985	29.8645	0.99444
NR1H2	0.256087	45.8205	46.0766	0.994442
METTL14	0.2087	37.4059	37.6146	0.994452
DTL	0.170004	30.4763	30.6463	0.994453
NUMB	0.164815	29.5571	29.7219	0.994455
SPAST	0.155319	27.9307	28.086	0.99447
DCLRE1A	0.225311	40.5172	40.7425	0.99447
VPS50	0.234343	42.1436	42.3779	0.99447
SENP6	0.203654	36.6281	36.8318	0.994471
NEMP1	0.167834	30.1935	30.3613	0.994472
RBM25	0.209451	37.6888	37.8982	0.994473
LOC100335177	0.203492	36.6281	36.8316	0.994475
TDRKH	0.187293	33.729	33.9163	0.994478
SRBD1	0.201403	36.2746	36.476	0.994478
CDKAL1	0.193154	34.7897	34.9828	0.994479
PRR14L	0.143282	25.8094	25.9527	0.994479
NCKAP1	0.222966	40.1637	40.3866	0.994479
RALGPS2	0.205691	37.0524	37.2581	0.994479
HIF1A	0.161156	29.0621	29.2232	0.994485
CNOT8	0.22265	40.1637	40.3863	0.994487
SUCLA2	0.173167	31.3248	31.498	0.994502
TAF12	0.160644	29.0621	29.2227	0.994503
SPC25	0.234025	42.3557	42.5897	0.994505
GAPDH	0.288998	52.3259	52.6149	0.994507
FEZ1	0.179996	32.5976	32.7776	0.994509
HDLBP	0.153733	27.86	28.0137	0.994512
CENPH	0.180445	32.739	32.9195	0.994519
TM7SF3	0.161722	29.3449	29.5067	0.994519
DDX21	0.169403	30.7591	30.9285	0.994523
LOC101905153	0.225693	41.0122	41.2379	0.994527
KIZ	0.156164	28.4257	28.5819	0.994536
CAND1	0.261011	47.5176	47.7786	0.994537
CDC40	0.140203	25.5266	25.6668	0.994538
ZFAND5	0.267192	48.6489	48.9161	0.994538
ZDHHC6	0.171853	31.3248	31.4967	0.994544
PPIH	0.255989	46.669	46.925	0.994545
OAT	0.246829	45.0427	45.2895	0.99455
ARL4A	0.234296	42.78	43.0143	0.994553
CLOCK	0.237005	43.2749	43.5119	0.994553
SLC25A30	0.0924711	16.8999	16.9923	0.994558
SUMO1	0.242569	44.3356	44.5782	0.994559
PLEKHA1	0.184397	33.729	33.9134	0.994563
RB1CC1	0.179277	32.8098	32.989	0.994566
MFAP1	0.218128	39.9515	40.1697	0.99457
PARD3B	0.212905	39.0323	39.2452	0.994575
GABARAPL2	0.298024	54.6594	54.9574	0.994577
SCML2	0.103701	19.0212	19.1249	0.994578
BLZF1	0.271659	49.851	50.1227	0.99458
KLHL7	0.184805	33.9411	34.1259	0.994585
ZFP64	0.28179	51.7602	52.042	0.994585
TMEM209	0.20661	37.9716	38.1782	0.994588
GOLGA1	0.114935	21.1425	21.2574	0.994593
CENPI	0.189023	34.7897	34.9787	0.994596
CLDND1	0.184717	34.0118	34.1966	0.994598
RICTOR	0.172276	31.7491	31.9214	0.994603
RAB3GAP1	0.184145	33.9411	34.1253	0.994604
CTR9	0.126971	23.4052	23.5322	0.994604
GSPT1	0.195241	35.9917	36.187	0.994605
VPS37A	0.189071	34.9311	35.1201	0.994616
DYNLL1	0.250828	46.3862	46.637	0.994622
FAR1	0.200383	37.1231	37.3235	0.994631
TIPIN	0.357633	66.2559	66.6135	0.994631
ESD	0.350165	64.9124	65.2626	0.994635
ARHGAP25	0.189936	35.2139	35.4039	0.994635
CHCHD7	0.163336	30.3349	30.4982	0.994644
CFTR	0.139488	25.9508	26.0903	0.994654
PPP2R1B	0.189987	35.426	35.616	0.994666
ARL5A	0.104627	19.5161	19.6208	0.994668
CNIH1	0.171532	32.0319	32.2035	0.994673
ZNF24	0.211237	39.4566	39.6678	0.994675
SUPV3L1	0.211899	39.6687	39.8806	0.994687
TMEM167A	0.226125	42.3557	42.5818	0.99469
CDCA7	0.143116	26.8701	27.0132	0.994702
ACTR3	0.124245	23.3345	23.4588	0.994704
ANGEL2	0.273163	51.336	51.6091	0.994707
MTSS1	0.0925513	17.3948	17.4874	0.994708
GIGYF2	0.174897	32.8805	33.0554	0.994709
GNPNAT1	0.145872	27.4357	27.5816	0.994711
COPS8	0.172534	32.4562	32.6287	0.994712
FXR1	0.176506	33.234	33.4105	0.994717
CSTF1	0.141573	26.6579	26.7995	0.994717
UBE2Q2	0.293652	55.2958	55.5894	0.994717
PARP2	0.173771	32.739	32.9128	0.99472
USP13	0.125666	23.6881	23.8137	0.994723
LYPLAL1	0.305723	57.6292	57.9349	0.994723
MAPKAP1	0.135271	25.5266	25.6618	0.994729
PSPC1	0.0917429	17.3241	17.4159	0.994732
GEMIN2	0.237674	44.9013	45.139	0.994735
HCFC1	0.11711	22.1324	22.2496	0.994737
TXNL1	0.144037	27.2236	27.3676	0.994737
ZNF75D	0.291124	55.0836	55.3747	0.994743
WLS	0.146081	27.6479	27.794	0.994744
KIT	0.22606	42.8507	43.0767	0.994752
BDP1	0.105064	19.9404	20.0455	0.994759
CIB1	0.355698	67.5287	67.8844	0.99476
DHX29	0.146857	27.9307	28.0776	0.99477
VPS45	0.34754	66.1145	66.462	0.994771
ALMS1	0.196232	37.3352	37.5315	0.994772
DEDD	0.203007	38.6787	38.8817	0.994779
BLCAP	0.216519	41.295	41.5116	0.994784
TRMT11	0.199069	38.0423	38.2414	0.994794
BPGM	0.347444	66.3973	66.7448	0.994794
NUP93	0.229332	43.8406	44.07	0.994796
TRAM1	0.166045	31.7491	31.9151	0.994797
SMG1	0.167452	32.0319	32.1994	0.9948
RNF19B	0.23382	44.7599	44.9937	0.994803
HACD3	0.144914	27.7893	27.9342	0.994812
ELOVL4	0.150074	28.7792	28.9293	0.994812
RAB5B	0.194577	37.3352	37.5298	0.994815
TIMM21	0.169376	32.5269	32.6963	0.99482
SCAMP3	0.109298	21.0011	21.1104	0.994823
XIAP	0.200543	38.608	38.8086	0.994832
TMOD1	0.260015	50.0632	50.3232	0.994833
MACC1	0.234243	45.1134	45.3477	0.994835
GINS3	0.12805	24.678	24.8061	0.994838
AP2M1	0.211693	40.8001	41.0118	0.994838
HNRNPR	0.119606	23.1224	23.242	0.994854
PGAM1	0.160556	31.042	31.2025	0.994854
DDIT3	0.286965	55.5786	55.8656	0.994863
USP47	0.139442	27.0115	27.1509	0.994864
BMPR1A	0.230951	44.7599	44.9908	0.994867
NEMF	0.319798	62.0133	62.3331	0.99487
CAPRIN2	0.166279	32.2441	32.4103	0.99487
MSANTD4	0.282005	54.8008	55.0828	0.99488
SNRPD3	0.330003	64.1346	64.4646	0.994881
TDRD1	0.228821	44.477	44.7058	0.994882
MED14	0.210258	40.8708	41.081	0.994882
SUB1	0.192427	37.4059	37.5984	0.994882
ZNF93	0.260412	50.6288	50.8893	0.994883
HDHD2	0.196138	38.1838	38.3799	0.99489
PIK3C3	0.241404	47.0226	47.264	0.994892
RAB1A	0.166615	32.4562	32.6228	0.994893
GTF2F2	0.129888	25.3144	25.4443	0.994895
WSB1	0.0990249	19.304	19.403	0.994896
MED10	0.208179	40.6586	40.8668	0.994906
LOC104969513	0.155998	30.4763	30.6323	0.994907
NIPBL	0.20662	40.3758	40.5824	0.994909
JKAMP	0.251327	49.2146	49.466	0.994919
GNL2	0.152384	29.8399	29.9923	0.994919
CGNL1	0.140382	27.5065	27.6468	0.994922
SESTD1	0.223956	43.9113	44.1353	0.994926
PSMD9	0.148539	29.1328	29.2813	0.994927
USP33	0.150995	29.6278	29.7788	0.994929
RRAS2	0.377619	74.1048	74.4824	0.99493
NABP1	0.178206	35.0018	35.18	0.994934
OGT	0.206494	40.5879	40.7944	0.994938
JOSD1	0.181665	35.7089	35.8906	0.994938
RCN2	0.201087	39.5273	39.7284	0.994938
CDH3	0.276549	54.3765	54.6531	0.99494
NADK2	0.363673	71.6299	71.9936	0.994949
TNRC6B	0.171881	33.8704	34.0423	0.994951
ATP5PB	0.286562	56.4978	56.7844	0.994954
FAM53C	0.227689	44.9013	45.129	0.994955
APLF	0.14093	27.86	28.0009	0.994967
SNX25	0.174762	34.5775	34.7523	0.994971
RIMS2	0.157407	31.1834	31.3408	0.994978
ZNF106	0.195211	38.6787	38.874	0.994978
IBTK	0.184427	36.5574	36.7418	0.99498
AFF1	0.174377	34.5775	34.7519	0.994982
EHBP1	0.173986	34.5068	34.6808	0.994983
RLF	0.168885	33.5169	33.6857	0.994986
KIAA1109	0.199365	39.598	39.7973	0.99499
C1H21orf91	0.161742	32.1734	32.3351	0.994998
CCZ1	0.266905	53.1037	53.3706	0.994999
DMTF1	0.0902027	17.9605	18.0507	0.995003
CRK	0.292766	58.3363	58.6291	0.995006
ZNF2	0.203959	40.6586	40.8626	0.995009
BRK1	0.190778	38.0423	38.2331	0.99501
PPP1R15A	0.138224	27.5772	27.7154	0.995013
ATP5PF	0.288407	57.5585	57.8469	0.995014
PRKG1	0.202129	40.3758	40.5779	0.995019
CBWD2	0.225338	45.0427	45.268	0.995022
DCAF1	0.197463	39.5273	39.7247	0.995029
NCBP3	0.123853	24.8194	24.9433	0.995035
CDK5	0.249947	50.1339	50.3838	0.995039
ZP3	0.22725	45.6084	45.8356	0.995042
HMGN1	0.147214	29.5571	29.7043	0.995044
USH2A	0.0972263	19.5869	19.6841	0.995061
TSNAX	0.170182	34.2947	34.4649	0.995062
FAM169A	0.215728	43.4871	43.7028	0.995064
CDO1	0.266685	53.8108	54.0775	0.995068
KIF5B	0.153113	30.9006	31.0537	0.995069
REPS1	0.179616	36.2746	36.4542	0.995073
EAPP	0.172244	34.7897	34.9619	0.995073
NOP58	0.21333	43.1335	43.3468	0.995079
MIA2	0.250676	50.6996	50.9502	0.99508
PRICKLE1	0.247505	50.0632	50.3107	0.99508
CTTN	0.207326	42.0021	42.2095	0.995088
SUDS3	0.180049	36.4867	36.6668	0.99509
SYF2	0.222226	45.0427	45.2649	0.995091
SPRED2	0.156264	31.6784	31.8346	0.995091
HAUS6	0.155281	31.537	31.6922	0.9951
ROCK1	0.227254	46.2448	46.472	0.99511
UPRT	0.171188	34.8604	35.0316	0.995113
FNDC3A	0.0996038	20.294	20.3936	0.995116
BAIAP2L1	0.228549	46.5983	46.8269	0.995119
MTREX	0.14317	29.2035	29.3467	0.995121
LAMTOR3	0.264094	53.8815	54.1456	0.995123
ELP4	0.147243	30.052	30.1993	0.995124
PRKRA	0.156896	32.0319	32.1888	0.995126
TPD52L2	0.233314	47.659	47.8923	0.995128
USP53	0.222151	45.3963	45.6184	0.99513
CTSC	0.258766	52.9623	53.2211	0.995138
SUCO	0.144625	29.6278	29.7724	0.995142
RBM6	0.139042	28.5671	28.7062	0.995156
UTP20	0.206881	42.6385	42.8454	0.995171
LRRC57	0.175625	36.2039	36.3795	0.995172
EIF2S3	0.248299	51.1945	51.4428	0.995173
CCP110	0.221869	45.7498	45.9717	0.995174
PRPF3	0.163447	33.729	33.8924	0.995177
COPG2	0.169267	35.0018	35.1711	0.995187
OSBPL8	0.160988	33.3047	33.4657	0.995189
CCDC14	0.197751	40.9415	41.1392	0.995193
ANLN	0.163562	33.8704	34.034	0.995194
PSMD5	0.14623	30.3349	30.4811	0.995203
EMC8	0.123727	25.668	25.7917	0.995203
USP37	0.111033	23.0517	23.1627	0.995206
NSRP1	0.20526	42.6385	42.8438	0.995209
CHURC1	0.161008	33.4462	33.6072	0.995209
CCT7	0.249808	51.9016	52.1514	0.99521
EEF1A1	0.257505	53.5987	53.8562	0.995219
HSPA4	0.124306	25.8801	26.0044	0.99522
HACE1	0.18027	37.5474	37.7276	0.995222
ANAPC11	0.199611	41.5779	41.7775	0.995222
SFT2D1	0.275652	57.5585	57.8341	0.995234
ZC3H11A	0.102543	21.4253	21.5279	0.995237
RIPK1	0.160388	33.5169	33.6772	0.995238
KIF14	0.110645	23.1224	23.233	0.995238
KLHDC2	0.222494	46.5276	46.7501	0.995241
SPTAN1	0.127643	26.7286	26.8563	0.995247
PTPN13	0.12645	26.5165	26.643	0.995254
ST13	0.209517	43.982	44.1916	0.995259
SLC12A2	0.18723	39.3151	39.5024	0.99526
TRAF7	0.305885	64.276	64.5819	0.995264
C28H1orf131	0.123143	25.8801	26.0033	0.995264
ASPM	0.255779	53.8108	54.0666	0.995269
MRPL38	0.185142	38.9616	39.1467	0.995271
LRCH3	0.104092	21.9203	22.0244	0.995274
USP2	0.219646	46.3155	46.5351	0.99528
CLCC1	0.204428	43.1335	43.3379	0.995283
TNPO1	0.13892	29.3449	29.4839	0.995288
SRRM1	0.13391	28.355	28.4889	0.9953
VCPIP1	0.126229	26.7993	26.9256	0.995312
GPI	0.181806	38.608	38.7898	0.995313
LSM12	0.14684	31.1834	31.3302	0.995313
POLR3D	0.119684	25.4558	25.5755	0.99532
ARHGEF28	0.159872	34.0118	34.1717	0.995321
CHEK1	0.173825	36.9817	37.1555	0.995322
RPS2	0.177035	37.6888	37.8658	0.995325
PDIA4	0.197857	42.1436	42.3414	0.995327
BANP	0.109769	23.4052	23.515	0.995332
ACLY	0.154186	32.8805	33.0347	0.995333
TUBG1	0.198563	42.3557	42.5543	0.995334
FAM133B	0.170636	36.416	36.5866	0.995336
NFKBIA	0.296706	63.3568	63.6535	0.995339
GABPB1	0.154594	33.0219	33.1765	0.99534
VPS26A	0.166782	35.6382	35.805	0.995342
CBX5	0.131371	28.0721	28.2035	0.995342
LOC618289	0.12936	27.6479	27.7772	0.995343
ZNF845	0.130213	27.86	27.9902	0.995348
GCNT3	0.129848	27.7893	27.9191	0.995349
CCL25	0.422942	90.5804	91.0033	0.995352
DUSP10	0.184787	39.598	39.7828	0.995355
PDIA3	0.160304	34.3654	34.5257	0.995357
TSPAN5	0.174114	37.3352	37.5094	0.995358
BCAR4	0.36741	78.8424	79.2098	0.995362
GPATCH2	0.204597	43.9113	44.1159	0.995362
FBXW11	0.112846	24.2538	24.3666	0.995369
XRN1	0.181152	38.9616	39.1427	0.995372
TIAM2	0.169283	36.416	36.5853	0.995373
CAMLG	0.207927	44.7599	44.9678	0.995376
DROSHA	0.202149	43.5578	43.7599	0.995381
TTC5	0.165212	35.8503	36.0155	0.995413
MTFR1	0.184096	40.0222	40.2063	0.995421
CSTF3	0.128071	27.86	27.9881	0.995424
KALRN	0.148199	32.2441	32.3923	0.995425
ARHGAP5	0.188865	41.1536	41.3425	0.995432
MYSM1	0.143067	31.1834	31.3265	0.995433
SNRNP27	0.21061	46.0327	46.2433	0.995446
JPT1	0.177588	38.8202	38.9977	0.995446
GPC4	0.21036	46.0327	46.243	0.995451
PSMA6	0.240382	52.6087	52.8491	0.995452
CIART	0.274045	60.0334	60.3074	0.995456
WARS	0.13458	29.4864	29.6209	0.995457
RPAP2	0.163055	35.921	36.0841	0.995481
DBT	0.393024	86.6206	87.0136	0.995483
FABP5	0.327443	72.1956	72.523	0.995485
MTAP	0.160055	35.3553	35.5154	0.995493
BZW1	0.168922	37.3352	37.5042	0.995496
TAF1B	0.201707	44.6184	44.8201	0.9955
TWF1	0.156243	34.5775	34.7338	0.995502
MRPS31	0.230668	51.0531	51.2838	0.995502
EXOC5	0.133769	29.6278	29.7615	0.995505
STAU2	0.0992391	21.991	22.0903	0.995508
TPM3	0.144522	32.0319	32.1765	0.995508
NAA15	0.108652	24.1123	24.221	0.995514
PHAX	0.20187	44.8306	45.0324	0.995517
RPF2	0.222234	49.3561	49.5783	0.995518
ADAM19	0.237599	52.8209	53.0585	0.995522
HSPA9	0.157873	35.1432	35.3011	0.995528
USP34	0.193437	43.0628	43.2562	0.995528
ARPP19	0.200371	44.6184	44.8188	0.995529
CCSER2	0.232175	51.7602	51.9924	0.995534
UBA1	0.137479	30.6884	30.8259	0.99554
LRBA	0.156271	34.9311	35.0873	0.995546
ZMYM5	0.172389	38.5373	38.7097	0.995547
NGDN	0.254187	56.8514	57.1056	0.995549
THAP5	0.277099	62.0133	62.2904	0.995551
PRKACB	0.121937	27.2943	27.4163	0.995552
BMPR1B	0.166766	37.3352	37.502	0.995553
CCAR1	0.186946	41.8607	42.0477	0.995554
C19H17orf49	0.27908	62.5082	62.7873	0.995555
PPM1G	0.177659	39.8101	39.9878	0.995557
SMAD5	0.25211	56.4978	56.7499	0.995558
VPS13B	0.158693	35.5675	35.7262	0.995558
SEC61A2	0.258631	57.9828	58.2414	0.995559
RBM5	0.20167	45.2548	45.4565	0.995563
NEDD4L	0.231116	51.9016	52.1328	0.995567
CWC25	0.189206	42.4971	42.6863	0.995568
UCHL3	0.255602	57.4171	57.6727	0.995568
CTCF	0.123696	27.7893	27.913	0.995569
PAF1	0.121411	27.2943	27.4157	0.995571
TDRD7	0.22549	50.6996	50.925	0.995572
RWDD4	0.10453	23.5467	23.6512	0.99558
GPR160	0.187959	42.3557	42.5437	0.995582
ANP32E	0.197694	44.6184	44.8161	0.995589
SELENOF	0.149626	33.7997	33.9493	0.995593
MDM2	0.1505	34.0118	34.1623	0.995595
AGK	0.231488	52.4673	52.6988	0.995607
SYPL1	0.281638	63.8517	64.1334	0.995609
DNAJB4	0.161372	36.6281	36.7895	0.995614
ZNHIT6	0.188743	42.8507	43.0394	0.995615
NMNAT1	0.0933021	21.2132	21.3065	0.995621
RAB18	0.122387	27.86	27.9824	0.995626
NUP160	0.23836	54.3058	54.5442	0.99563
NUFIP1	0.15421	35.1432	35.2974	0.995631
TADA1	0.174964	39.8808	40.0558	0.995632
ASXL2	0.0936622	21.3546	21.4483	0.995633
CENPO	0.248445	56.8514	57.0998	0.995649
LINGO2	0.163138	37.3352	37.4984	0.995649
PTMA	0.144598	33.0926	33.2372	0.99565
CNOT10	0.134985	30.9006	31.0356	0.995651
ERH	0.233144	53.3866	53.6197	0.995652
COPA	0.115785	26.5165	26.6323	0.995652
APAF1	0.122441	28.0721	28.1946	0.995657
ATP2A2	0.216433	49.7096	49.926	0.995665
C15H11orf58	0.277274	63.7103	63.9876	0.995667
GINS2	0.151214	34.8604	35.0116	0.995681
SON	0.200415	46.2448	46.4452	0.995685
RNF115	0.123975	28.6378	28.7618	0.99569
HOOK3	0.172921	39.9515	40.1245	0.99569
CNOT1	0.168511	38.9616	39.1301	0.995694
FH	0.17336	40.093	40.2663	0.995695
SDE2	0.180687	41.79	41.9707	0.995695
CIR1	0.229252	53.033	53.2623	0.995696
CUL4B	0.133835	30.9713	31.1051	0.995697
ARID4A	0.190442	44.1235	44.3139	0.995702
PPP4R3B	0.175361	40.6586	40.834	0.995706
SLU7	0.121369	28.1428	28.2642	0.995706
CENPL	0.174393	40.4465	40.6209	0.995707
PTBP1	0.152176	35.426	35.5782	0.995723
SUGT1	0.150028	34.9311	35.0811	0.995723
PDPK1	0.0956538	22.2739	22.3695	0.995724
MORC3	0.11354	26.4458	26.5593	0.995725
PDRG1	0.149491	34.8604	35.0099	0.99573
UNG	0.183383	42.78	42.9633	0.995732
NLRP2	0.207209	48.3661	48.5733	0.995734
MAPK8	0.0881431	20.5768	20.665	0.995735
PAPD4	0.106803	24.9609	25.0677	0.995739
PARN	0.225877	52.8209	53.0468	0.995742
CWC22	0.180518	42.2143	42.3948	0.995742
POLR2C	0.244816	57.4171	57.6619	0.995754
TES	0.198566	46.5983	46.7969	0.995757
TTK	0.162099	38.0423	38.2044	0.995757
G3BP1	0.253568	59.5384	59.792	0.995759
NEB	0.299761	70.4278	70.7276	0.995762
CLIC1	0.23379	54.9422	55.176	0.995763
MCM4	0.168464	39.598	39.7664	0.995764
MPP7	0.167796	39.4566	39.6244	0.995765
ORC2	0.116178	27.4357	27.5519	0.995783
PCMTD2	0.176538	41.7193	41.8958	0.995786
FAM172A	0.103681	24.5366	24.6403	0.995792
CRIPT	0.208447	49.3561	49.5645	0.995794
FANCD2	0.163513	38.7495	38.913	0.995798
UBA2	0.115987	27.5065	27.6224	0.995801
TAF1A	0.258412	61.3062	61.5646	0.995803
SPDL1	0.261281	62.0133	62.2745	0.995804
PMS1	0.137445	32.6683	32.8058	0.99581
CEP78	0.179682	42.7092	42.8889	0.995811
WDR5	0.163314	38.8202	38.9835	0.995811
NEK1	0.10562	25.173	25.2786	0.995822
RRN3	0.136154	32.4562	32.5924	0.995823
2024-09-07	0.106906	25.5266	25.6335	0.995829
PPP6C	0.205525	49.1439	49.3494	0.995835
C14H8orf76	0.205224	49.0732	49.2784	0.995835
ERCC6L	0.177847	42.5678	42.7457	0.995839
PHYHIPL	0.246079	58.902	59.1481	0.99584
RNF141	0.140117	33.5876	33.7277	0.995846
AFG3L2	0.104107	24.9609	25.065	0.995846
RNF111	0.166637	40.0222	40.1889	0.995854
MYLIP	0.203383	48.9318	49.1352	0.995861
DLG5	0.2445	58.8313	59.0758	0.995861
ARPC2	0.184491	44.4063	44.5908	0.995863
EIF5A	0.200198	48.2247	48.4249	0.995866
OSBPL3	0.108196	26.0922	26.2004	0.99587
UFM1	0.301916	72.832	73.1339	0.995872
PALB2	0.256586	61.9426	62.1991	0.995875
MIS18BP1	0.117994	28.5671	28.6851	0.995887
ESRP1	0.192174	46.5276	46.7198	0.995887
PPA1	0.351603	85.2064	85.558	0.99589
SUV39H2	0.166312	40.3051	40.4714	0.995891
SARNP	0.281195	68.2358	68.517	0.995896
MAGI3	0.282501	68.7308	69.0133	0.995907
NARS	0.240909	58.6192	58.8601	0.995907
IST1	0.17942	43.6992	43.8786	0.995911
MCU	0.185702	45.2548	45.4405	0.995913
LOC104971501	0.183328	44.6891	44.8725	0.995914
CDK7	0.25072	61.1647	61.4155	0.995918
MFN1	0.143139	34.9311	35.0742	0.995919
SF3B1	0.249743	60.9526	61.2023	0.995919
LIN7C	0.266832	65.1245	65.3914	0.995919
CERS5	0.205474	50.2753	50.4808	0.99593
DNA2	0.0855372	20.9304	21.0159	0.99593
ERRFI1	0.197343	48.2954	48.4927	0.99593
SENP8	0.184178	45.1841	45.3683	0.99594
CEP85	0.132385	32.5269	32.6593	0.995946
WSB2	0.13034	32.0319	32.1623	0.995947
HNRNPD	0.193531	47.5883	47.7818	0.99595
NBR1	0.130799	32.1734	32.3042	0.995951
HIST1H1A	0.252051	62.0133	62.2653	0.995952
LOC100299712	0.31694	78.1353	78.4522	0.99596
AKTIP	0.184575	45.6084	45.793	0.995969
HSD17B12	0.121035	29.9106	30.0317	0.99597
GAR1	0.165923	41.0122	41.1781	0.995971
CFL1	0.256552	63.4982	63.7547	0.995976
ORC6	0.222889	55.2958	55.5186	0.995985
GOLGA4	0.167434	41.5637	41.7312	0.995988
SPICE1	0.107911	26.7993	26.9073	0.99599
ANKRD46	0.137639	34.224	34.3616	0.995994
BIN2	0.120553	30.052	30.1726	0.996005
DSCC1	0.145181	36.2039	36.349	0.996006
PHB	0.183177	45.6791	45.8623	0.996006
ACTR2	0.117225	29.2742	29.3914	0.996012
WDSUB1	0.196423	49.0732	49.2696	0.996013
RAD21	0.18499	46.2448	46.4298	0.996016
PLAUR	0.225916	56.6393	56.8652	0.996027
RAB2A	0.125156	31.4663	31.5914	0.996038
NOP56	0.166943	42.0729	42.2398	0.996048
RFC1	0.2564	64.771	65.0274	0.996057
APBB2	0.141865	35.8503	35.9922	0.996058
STOML2	0.160274	40.5172	40.6775	0.99606
YME1L1	0.102811	26.0215	26.1243	0.996065
SEC23A	0.185694	47.0226	47.2083	0.996066
GSR	0.158654	40.2344	40.393	0.996072
SH3GLB1	0.106195	26.9408	27.047	0.996074
CEP295	0.147998	37.6181	37.7661	0.996081
MRPL15	0.227648	57.912	58.1397	0.996084
CSPP1	0.328368	83.58	83.9084	0.996087
DHX35	0.186361	47.4469	47.6332	0.996088
OTUD6B	0.264099	67.2459	67.51	0.996088
ARHGAP29	0.174813	44.5477	44.7225	0.996091
LOC508073	0.29639	75.6604	75.9568	0.996098
PACSIN2	0.109688	28.0014	28.1111	0.996098
CEP120	0.224737	57.4171	57.6418	0.996101
PRR14	0.229273	58.6192	58.8484	0.996104
GFM2	0.155545	39.8101	39.9657	0.996108
CBFB	0.256164	65.6195	65.8757	0.996111
RP2	0.109255	28.0014	28.1107	0.996113
NUTF2	0.231484	59.4677	59.6992	0.996122
NUP43	0.212324	54.5886	54.801	0.996126
PARP12	0.304667	78.3474	78.6521	0.996126
ELAVL2	0.165338	42.5678	42.7332	0.996131
VTA1	0.214301	55.5079	55.7222	0.996154
PDK3	0.2345	60.7405	60.975	0.996154
TP53INP1	0.216454	56.0736	56.29	0.996155
LRRCC1	0.215163	55.7907	56.0059	0.996158
ZNF280D	0.229104	59.4677	59.6968	0.996162
ASH2L	0.175577	45.6791	45.8547	0.996171
NFYC	0.173378	45.1134	45.2868	0.996172
UBE2V1	0.258632	67.3873	67.6459	0.996177
BAZ1A	0.178093	46.4569	46.635	0.996181
SMC5	0.219981	57.4171	57.6371	0.996183
MKRN2	0.133737	34.9311	35.0648	0.996186
KMT2E	0.105467	27.5772	27.6826	0.99619
GOPC	0.263451	68.9429	69.2064	0.996193
POLE2	0.254255	66.5387	66.793	0.996193
SEC63	0.124678	32.6683	32.793	0.996198
SCFD1	0.297755	78.0646	78.3623	0.9962
NUF2	0.143068	37.5474	37.6904	0.996204
RNF38	0.244204	64.1346	64.3788	0.996207
ATP2B1	0.165346	43.5578	43.7231	0.996218
AK4	0.12958	34.1533	34.2828	0.99622
CWC15	0.228236	60.2455	60.4737	0.996226
JAK1	0.133239	35.2139	35.3472	0.996231
SEPSECS	0.116875	30.9006	31.0174	0.996232
ANAPC15	0.351975	93.126	93.4779	0.996235
ERGIC2	0.220464	58.3363	58.5568	0.996235
TOX4	0.10616	28.1428	28.249	0.996242
DAAM1	0.162969	43.2042	43.3672	0.996242
CEPT1	0.261039	69.2258	69.4868	0.996243
TIMM44	0.172119	45.6791	45.8512	0.996246
FBXO30	0.112375	29.8399	29.9523	0.996248
HP1BP3	0.137907	36.6281	36.766	0.996249
RASA1	0.258656	68.7308	68.9894	0.996251
PDXDC1	0.147019	39.103	39.25	0.996254
GLUL	0.315198	83.9336	84.2488	0.996259
HBS1L	0.269465	71.7713	72.0408	0.99626
DDX25	0.16167	43.1335	43.2952	0.996266
ZNF330	0.226683	60.5991	60.8257	0.996273
RPA1	0.151013	40.3758	40.5268	0.996274
NRAS	0.115579	30.9713	31.0869	0.996282
PUM2	0.0949511	25.4558	25.5508	0.996284
BRPF3	0.213041	57.1342	57.3473	0.996285
PAK2	0.127588	34.224	34.3516	0.996286
RNF17	0.0989874	26.6579	26.7569	0.9963
PLEKHB2	0.148488	40.0222	40.1707	0.996304
VPS8	0.184979	49.9217	50.1067	0.996308
RAB3GAP2	0.0943017	25.4558	25.5501	0.996309
RGS16	0.214497	57.9828	58.1973	0.996314
PLEKHF2	0.230589	62.3668	62.5974	0.996316
RANBP2	0.176123	47.659	47.8351	0.996318
RAP1A	0.184957	50.0632	50.2481	0.996319
GNS	0.201834	54.7301	54.9319	0.996326
CEP170	0.133135	36.2039	36.337	0.996336
SBNO1	0.147807	40.2344	40.3822	0.99634
RRM1	0.160458	43.6992	43.8597	0.996342
DCTN4	0.159621	43.4871	43.6467	0.996343
TMEM109	0.280395	76.509	76.7893	0.996349
BCL10	0.143803	39.2444	39.3882	0.996349
PPIL4	0.214624	58.6192	58.8338	0.996352
LOC515333	0.174339	47.659	47.8333	0.996355
SMU1	0.155107	42.4264	42.5815	0.996357
SNRPB2	0.223333	61.094	61.3174	0.996358
FAM117B	0.226349	61.9426	62.1689	0.996359
EIF4ENIF1	0.281581	77.1453	77.4269	0.996363
2024-09-11	0.158535	43.5578	43.7163	0.996374
MRPL37	0.233706	64.276	64.5097	0.996377
POLD3	0.0999815	27.5065	27.6064	0.996378
TMEM163	0.256753	70.64	70.8967	0.996378
TMEM60	0.400908	110.309	110.71	0.996379
RSRC2	0.118453	32.5976	32.7161	0.996379
TMEM14C	0.32968	90.7925	91.1222	0.996382
SLC2A12	0.158983	43.9113	44.0703	0.996393
VAMP3	0.285811	78.9838	79.2696	0.996394
TMPO	0.120513	33.3047	33.4252	0.996395
WDR70	0.152892	42.285	42.4379	0.996397
YIPF5	0.155991	43.2042	43.3602	0.996402
NME7	0.288447	79.9738	80.2622	0.996406
TMEM59	0.248527	68.9429	69.1914	0.996408
CNOT2	0.201372	55.9321	56.1335	0.996413
HADH	0.189784	52.7502	52.9399	0.996415
USP4	0.0744473	20.7182	20.7927	0.99642
SAMD8	0.186441	51.9016	52.0881	0.996421
TMEM128	0.191423	53.3159	53.5073	0.996422
LYSMD4	0.16573	46.3155	46.4812	0.996434
FAM126B	0.127268	35.5675	35.6947	0.996435
ABRAXAS1	0.144596	40.5172	40.6618	0.996444
RBMX2	0.174051	48.8611	49.0351	0.99645
SMC4	0.366734	103.167	103.534	0.996458
PHF3	0.246062	69.2258	69.4718	0.996458
IQGAP2	0.259454	73.1148	73.3743	0.996464
CDKL2	0.161958	45.8205	45.9825	0.996478
RBM4	0.194535	55.0836	55.2782	0.996481
PRPF4	0.15072	42.8507	43.0014	0.996495
TAOK3	0.140423	39.9515	40.092	0.996497
PELI1	0.137708	39.2444	39.3821	0.996503
RAD54L2	0.167746	47.8711	48.0389	0.996508
RARS	0.2787	79.5495	79.8282	0.996509
GOT2	0.169472	48.5782	48.7477	0.996523
C20H5orf34	0.206612	59.2555	59.4622	0.996525
INTS9	0.222462	63.9225	64.1449	0.996532
ALG6	0.204	58.6192	58.8232	0.996532
SS18	0.205865	59.3263	59.5321	0.996542
WDYHV1	0.244245	70.4278	70.6721	0.996544
EXOSC9	0.151159	43.6285	43.7796	0.996547
ARL6	0.212375	61.3769	61.5892	0.996552
VDAC1	0.266414	77.1453	77.4118	0.996558
MTCH2	0.100589	29.1328	29.2334	0.996559
COX7A2L	0.373513	108.47	108.844	0.996568
PRPF18	0.2088	60.7405	60.9493	0.996574
ENY2	0.267458	77.8525	78.1199	0.996576
SF3B4	0.199968	58.2656	58.4656	0.99658
NUB1	0.162927	47.5176	47.6805	0.996583
N4BP2L2	0.230378	67.3166	67.5469	0.996589
TOP2B	0.283414	82.8729	83.1563	0.996592
ZNF207	0.16625	48.6489	48.8152	0.996594
CGGBP1	0.167638	49.0732	49.2408	0.996596
ODC1	0.436369	127.986	128.423	0.996602
LOC112445052	0.16969	49.7803	49.95	0.996603
ABHD18	0.15341	45.0427	45.1961	0.996606
F3	0.24482	71.9128	72.1576	0.996607
PPFIBP1	0.115573	34.0118	34.1274	0.996613
SCAF8	0.209405	61.6597	61.8691	0.996615
BLM	0.202119	59.5384	59.7405	0.996617
ACTG1	0.260679	76.8625	77.1232	0.99662
FBXW7	0.214235	63.2153	63.4296	0.996622
KIF4A	0.151478	44.8306	44.982	0.996632
MORF4L2	0.284756	84.2871	84.5719	0.996633
ABI1	0.151591	44.9013	45.0529	0.996635
ITGB1	0.273449	81.0344	81.3079	0.996637
SLC4A1AP	0.16279	48.2954	48.4582	0.996641
TRIM33	0.180337	53.528	53.7083	0.996642
DCAF13	0.245336	72.9027	73.148	0.996646
ZCCHC6	0.142652	42.4264	42.5691	0.996649
STAU1	0.160586	47.8004	47.961	0.996652
LOC505120	0.212492	63.2861	63.4985	0.996654
NCOA4	0.111298	33.1633	33.2746	0.996655
STRIP1	0.200503	59.7505	59.951	0.996656
OARD1	0.220615	65.7609	65.9815	0.996656
BICC1	0.203652	60.8112	61.0148	0.996662
RABL2B	0.19723	58.902	59.0992	0.996663
B3GALNT2	0.123567	36.9817	37.1053	0.99667
DNAJC9	0.126969	38.0423	38.1693	0.996674
STX17	0.159585	47.9418	48.1014	0.996682
SRSF10	0.201439	60.5283	60.7298	0.996683
FNBP1L	0.181108	54.6594	54.8405	0.996698
TBCC	0.123207	37.1938	37.317	0.996698
DNAJA2	0.0929811	28.0721	28.1651	0.996699
PRKCH	0.141199	42.6385	42.7797	0.996699
TRIM59	0.197577	59.6798	59.8774	0.9967
EPB41L2	0.131515	39.8101	39.9416	0.996707
RNF20	0.166519	50.4167	50.5832	0.996708
SYCP3	0.243121	73.6098	73.8529	0.996708
SAE1	0.333756	101.116	101.45	0.99671
TMEM39A	0.159141	48.2954	48.4545	0.996716
ICE2	0.227526	69.0843	69.3119	0.996717
CDC42SE2	0.178089	54.1644	54.3425	0.996723
TRAFD1	0.184947	56.2857	56.4706	0.996725
RAB30	0.135684	41.295	41.4307	0.996725
NDC80	0.176131	53.6694	53.8455	0.996729
TRMT112	0.317244	96.8736	97.1909	0.996736
RBPMS	0.229877	70.2157	70.4456	0.996737
TMOD3	0.146046	44.6184	44.7645	0.996737
TMX2	0.230921	70.5693	70.8002	0.996738
LARS	0.143629	43.9113	44.055	0.99674
WDR75	0.170617	52.2552	52.4258	0.996746
STMP1	0.275675	84.4993	84.7749	0.996748
RMC1	0.215513	66.2559	66.4714	0.996758
UBR7	0.155479	47.9418	48.0973	0.996767
CIP2A	0.150731	46.5276	46.6784	0.996771
AP3B1	0.131398	40.5879	40.7193	0.996773
SHOC2	0.160716	49.7096	49.8703	0.996777
PDE6C	0.231604	71.7006	71.9322	0.99678
NUDT15	0.287702	89.0955	89.3832	0.996781
DEK	0.133736	41.4365	41.5702	0.996783
GIT2	0.1313	40.7294	40.8607	0.996787
CSTB	0.201197	62.4375	62.6387	0.996788
GPATCH1	0.109478	34.0118	34.1213	0.996792
MORF4L1	0.139728	43.4164	43.5561	0.996792
NUP98	0.165726	51.6188	51.7845	0.9968
LMBRD1	0.197438	61.6597	61.8571	0.996808
MRPL20	0.230145	71.9128	72.1429	0.99681
SLC39A10	0.178259	55.72	55.8983	0.996811
CEP350	0.177807	55.72	55.8978	0.996819
DERL1	0.172119	53.9522	54.1244	0.99682
RBM34	0.134887	42.4264	42.5613	0.996831
ADIPOR1	0.152625	48.0833	48.2359	0.996836
TSPAN3	0.182817	57.6292	57.812	0.996838
SACM1L	0.12829	40.4465	40.5748	0.996838
USP7	0.173593	54.8008	54.9744	0.996842
ATAD5	0.142613	45.1134	45.256	0.996849
NAMPT	0.144805	46.1034	46.2482	0.996869
NUFIP2	0.167305	53.3159	53.4832	0.996872
SPATA5	0.124765	39.8808	40.0056	0.996881
H3F3A	0.214309	68.5894	68.8037	0.996885
DPP8	0.25182	80.6102	80.862	0.996886
MVP	0.209775	67.2459	67.4556	0.99689
CCT3	0.155943	49.9924	50.1484	0.99689
MAP2K1	0.190139	61.094	61.2842	0.996897
GOLT1B	0.18964	60.9526	61.1422	0.996898
RABL3	0.153768	49.6389	49.7927	0.996912
MINDY3	0.188677	60.9526	61.1413	0.996914
USP15	0.109374	35.3553	35.4647	0.996916
GLO1	0.550993	178.12	178.671	0.996916
CNOT6L	0.219143	70.8521	71.0712	0.996917
ATP6V1C1	0.181089	58.6192	58.8002	0.99692
SREK1IP1	0.174584	56.5685	56.7431	0.996923
ARL14EP	0.204704	66.468	66.6727	0.99693
KIF15	0.126064	40.9415	41.0675	0.99693
CHCHD3	0.238544	77.4989	77.7374	0.996931
KPNA2	0.324068	105.288	105.612	0.996932
TRIP13	0.231949	75.3776	75.6095	0.996932
RIF1	0.151875	49.3561	49.5079	0.996932
PHF11	0.170963	55.6493	55.8203	0.996937
SMAD2	0.178812	58.2656	58.4444	0.99694
ARMC1	0.130436	42.78	42.9104	0.99696
RBM39	0.0811775	26.7286	26.8098	0.996972
UBC	0.265763	87.6105	87.8763	0.996976
EIF2AK1	0.184422	60.8112	60.9956	0.996976
CEP57	0.174732	57.6292	57.8039	0.996977
HNRNPM	0.065774	21.7082	21.774	0.996979
PIAS1	0.306393	101.258	101.564	0.996983
CRCP	0.15376	50.841	50.9947	0.996985
POLR3K	0.331771	109.743	110.075	0.996986
AKAP9	0.233066	77.2161	77.4491	0.996991
RNF216	0.141922	47.0226	47.1645	0.996991
ATP11B	0.168362	55.8614	56.0298	0.996995
ALG13	0.200924	66.6802	66.8811	0.996996
CEP70	0.182783	60.7405	60.9233	0.997
CHL1	0.201058	66.8216	67.0226	0.997
FAM46B	0.235281	78.206	78.4413	0.997001
PA2G4	0.119403	39.7394	39.8588	0.997004
ETFA	0.183518	61.1647	61.3483	0.997009
SEC13	0.189565	63.2153	63.4049	0.99701
LOC112446404	0.300356	100.268	100.568	0.997013
BLMH	0.150134	50.1339	50.284	0.997014
TENT5C	0.243988	81.5294	81.7734	0.997016
CENPC	0.160236	53.5987	53.7589	0.997019
SLC25A17	0.26243	87.8934	88.1558	0.997023
AASDH	0.105314	35.2846	35.3899	0.997024
KIF20A	0.20937	70.2157	70.4251	0.997027
CSNK2A1	0.232657	78.0646	78.2972	0.997029
LMO7	0.13769	46.2448	46.3825	0.997031
SDCBP	0.246214	82.7315	82.9777	0.997033
TRIP4	0.200641	67.458	67.6586	0.997035
MICAL2	0.171378	57.6999	57.8713	0.997039
MTUS1	0.161039	54.2351	54.3961	0.99704
MIER1	0.101987	34.3654	34.4674	0.997041
NAA20	0.305813	103.167	103.473	0.997045
HECTD4	0.21981	74.1755	74.3953	0.997045
ZBTB43	0.152196	51.4067	51.5589	0.997048
SRGAP1	0.138144	46.669	46.8072	0.997049
ATP10D	0.147553	49.851	49.9986	0.997049
MED4	0.304855	103.025	103.33	0.99705
ADIPOR2	0.123422	41.79	41.9134	0.997055
ZNF706	0.222713	75.4483	75.671	0.997057
SPOP	0.0855789	29.0621	29.1477	0.997064
USB1	0.231751	78.8424	79.0742	0.997069
CDC37L1	0.0977647	33.3047	33.4025	0.997073
TBL1XR1	0.204955	70.0743	70.2792	0.997084
AP3M1	0.197976	67.7408	67.9388	0.997086
SFXN4	0.203529	69.7207	69.9243	0.997089
ORC4	0.233529	80.1859	80.4194	0.997096
ARHGAP11A	0.166592	57.3464	57.513	0.997103
CCNB2	0.259355	89.3783	89.6377	0.997107
TRIM13	0.180875	62.4375	62.6184	0.997111
MYF5	0.267417	92.4896	92.757	0.997117
U2SURP	0.102431	35.4968	35.5992	0.997123
DERL2	0.177277	61.4476	61.6249	0.997123
CDCA3	0.177128	61.4476	61.6247	0.997126
NIFK	0.17975	62.3668	62.5466	0.997126
OPTN	0.125117	43.4164	43.5415	0.997126
PPM1B	0.153061	53.1744	53.3275	0.99713
TXLNG	0.143155	49.9924	50.1356	0.997145
TUBE1	0.257526	90.0147	90.2722	0.997147
TMEM150A	0.219233	76.7211	76.9403	0.997151
ICA1L	0.129372	45.3255	45.4549	0.997154
PAFAH1B2	0.133402	46.8105	46.9439	0.997158
PSMD12	0.146485	51.5481	51.6946	0.997166
MNAT1	0.16689	58.7606	58.9275	0.997168
LOC515042	0.300558	105.854	106.154	0.997169
MRE11	0.210259	74.1048	74.315	0.997171
RNF14	0.139057	49.0732	49.2123	0.997174
DNAJC7	0.151652	53.5987	53.7503	0.997179
ARF1	0.206827	73.1148	73.3217	0.997179
RAD17	0.233607	82.6608	82.8944	0.997182
BNC2	0.0736806	26.0922	26.1659	0.997184
CRNKL1	0.15592	55.2958	55.4517	0.997188
NCK1	0.174789	62.0133	62.1881	0.997189
NCBP1	0.163937	58.2656	58.4295	0.997194
AMD1	0.18758	66.7509	66.9385	0.997198
UBAP2L	0.103015	36.7696	36.8726	0.997206
PHKA2	0.0999439	35.7089	35.8088	0.997209
RBM7	0.185602	66.3973	66.5829	0.997212
MYH10	0.139765	50.1339	50.2736	0.99722
CS	0.199039	71.4178	71.6168	0.997221
LOC515736	0.118987	42.7092	42.8282	0.997222
RBM44	0.20387	73.1856	73.3894	0.997222
MAPRE1	0.237897	85.4185	85.6564	0.997223
NVL	0.214381	77.0039	77.2183	0.997224
PIAS2	0.1016	36.5574	36.659	0.997229
TCEA1	0.182113	65.6195	65.8016	0.997232
TMEM159	0.234937	85.1357	85.3706	0.997248
RAB10	0.137899	49.9924	50.1303	0.997249
RAI14	0.152578	55.3665	55.519	0.997252
2024-03-07	0.189201	68.6601	68.8493	0.997252
FAM114A2	0.119912	43.6285	43.7484	0.997259
EIF4A2	0.215035	78.2767	78.4918	0.99726
SF3A3	0.216343	78.7717	78.988	0.997261
SCLT1	0.107752	39.3151	39.4229	0.997267
PHTF2	0.106094	38.7495	38.8555	0.99727
NUP133	0.130963	47.9418	48.0728	0.997276
CSNK1G3	0.321694	117.804	118.126	0.997277
RNF10	0.137456	50.4167	50.5542	0.997281
CLPX	0.14082	51.6895	51.8303	0.997283
UTP15	0.118402	43.4871	43.6055	0.997285
PARP1	0.099645	36.6281	36.7278	0.997287
IRF6	0.155761	57.2756	57.4314	0.997288
STAR	0.204898	75.3776	75.5825	0.997289
WBP11	0.138505	50.9824	51.1209	0.997291
SUCLG2	0.168255	61.9426	62.1108	0.997291
VPS13A	0.113402	41.79	41.9034	0.997294
PNO1	0.163649	60.3162	60.4799	0.997294
TINF2	0.115709	42.7092	42.825	0.997298
ACTB	0.306253	113.066	113.373	0.997299
ABCF2	0.161792	59.7505	59.9123	0.9973
ATAD1	0.214174	79.196	79.4101	0.997303
DDX46	0.153455	56.8514	57.0048	0.997308
LHFPL3	0.133742	49.5682	49.7019	0.997309
GNPAT	0.0965913	35.8503	35.9469	0.997313
SOD1	0.27048	100.551	100.821	0.997317
MCM10	0.143221	53.2451	53.3884	0.997317
CHMP5	0.260723	96.9443	97.2051	0.997318
GTPBP4	0.237654	88.3883	88.626	0.997318
UBE2W	0.22214	82.6608	82.8829	0.99732
SNRPA1	0.119988	44.6891	44.8091	0.997322
FER	0.310722	115.753	116.064	0.997323
LTV1	0.222786	83.085	83.3078	0.997326
PADI6	0.14673	54.7301	54.8768	0.997326
S100PBP	0.176399	65.8316	66.008	0.997328
WBP4	0.157802	58.9727	59.1305	0.997331
CLK3	0.210205	78.6303	78.8405	0.997334
RARS2	0.240439	89.944	90.1844	0.997334
USP6NL	0.182595	68.3065	68.4891	0.997334
AK2	0.124654	46.669	46.7937	0.997336
PDIA6	0.186207	69.7207	69.9069	0.997336
COG6	0.164453	61.589	61.7535	0.997337
STT3B	0.161235	60.3869	60.5482	0.997337
AGPS	0.177092	66.3266	66.5037	0.997337
ACSL3	0.120507	45.1841	45.3046	0.99734
COPB1	0.206209	77.4282	77.6344	0.997344
HNRNPA1	0.176234	66.1852	66.3614	0.997344
IWS1	0.109603	41.2243	41.3339	0.997348
XRN2	0.116658	43.9113	44.028	0.99735
CHAF1A	0.119763	45.1134	45.2332	0.997352
SNRPG	0.236595	89.1662	89.4028	0.997354
TMCC3	0.190192	71.7713	71.9615	0.997357
REXO2	0.336777	127.138	127.475	0.997358
EXT1	0.190466	71.9128	72.1032	0.997358
DHX36	0.160268	60.5283	60.6886	0.997359
EFCAB14	0.15083	56.9928	57.1436	0.997361
HSPA4L	0.152232	57.6292	57.7814	0.997365
MYO6	0.0991898	37.6888	37.788	0.997375
BBS2	0.141244	53.6694	53.8106	0.997375
ARHGAP12	0.105503	40.1637	40.2692	0.99738
KIDINS220	0.139694	53.2451	53.3848	0.997383
RAMMET	0.260057	99.1364	99.3964	0.997384
DYNC1LI1	0.222622	85.1357	85.3583	0.997392
CTNNA1	0.160767	61.5183	61.6791	0.997393
EFTUD2	0.118889	45.8205	45.9394	0.997412
FBXO5	0.255377	98.6414	98.8968	0.997418
ARL13B	0.0931526	35.9917	36.0849	0.997419
MOS	0.25484	98.7121	98.9669	0.997425
ZFR	0.108636	42.1436	42.2522	0.997429
MBD4	0.151568	58.8313	58.9829	0.99743
ERCC3	0.11978	46.7398	46.8595	0.997444
NUP54	0.269223	105.217	105.487	0.997448
GJC1	0.15818	62.0133	62.1714	0.997456
FBXL4	0.158546	62.3668	62.5254	0.997464
TMEM225B	0.212766	83.7214	83.9342	0.997465
CHP1	0.157055	61.8011	61.9582	0.997465
PATJ	0.150191	59.1141	59.2643	0.997466
ECT2	0.213566	84.2164	84.43	0.99747
FRG1	0.159624	63.0032	63.1628	0.997473
AKIRIN2	0.225485	89.0955	89.3209	0.997476
SUPT16H	0.115307	45.6791	45.7944	0.997482
RTF1	0.156124	62.0133	62.1694	0.997489
SPATA22	0.223162	88.8833	89.1065	0.997496
AKAP11	0.236868	94.4695	94.7063	0.997499
TOP1	0.201017	80.2566	80.4576	0.997502
PSMA4	0.137096	54.8008	54.9379	0.997505
MAPK6	0.134907	53.9522	54.0872	0.997506
CFDP2	0.142623	57.1342	57.2769	0.99751
CASP6	0.225246	90.439	90.6642	0.997516
SEC31A	0.0784576	31.6784	31.7568	0.997529
USP1	0.102713	41.5072	41.6099	0.997532
PLRG1	0.119367	48.2954	48.4148	0.997534
TRIP12	0.190812	77.2161	77.4069	0.997535
KAT6B	0.138865	56.215	56.3539	0.997536
DDHD2	0.138301	56.0029	56.1412	0.997537
HNRNPA3	0.179643	72.7613	72.9409	0.997537
FBXO34	0.150128	60.9526	61.1027	0.997543
CEBPZ	0.203035	82.5194	82.7224	0.997546
LOC100336984	0.434943	177.555	177.989	0.997556
PLIN2	0.165845	67.7408	67.9067	0.997558
SPTBN1	0.145612	59.6091	59.7547	0.997563
EIF4G2	0.222318	91.1461	91.3684	0.997567
EML4	0.0773701	31.7491	31.8265	0.997569
TTF2	0.0992456	40.7294	40.8286	0.997569
BUB1B	0.126393	51.9016	52.028	0.997571
TOMM70	0.134997	55.5079	55.6429	0.997574
RAF1	0.242678	99.9849	100.228	0.997579
SUPT20H	0.188996	77.9232	78.1122	0.99758
CD164	0.135484	55.9321	56.0676	0.997584
KDELR2	0.251447	103.874	104.125	0.997585
PPP1R12A	0.181603	75.3069	75.4885	0.997594
KIF2C	0.150674	62.579	62.7296	0.997598
PNN	0.145273	60.4576	60.6029	0.997603
WDR19	0.230572	96.0251	96.2557	0.997605
CKAP2	0.244123	101.965	102.209	0.997612
TFG	0.184656	77.711	77.8957	0.997629
GFI1	0.194416	82.3779	82.5724	0.997646
SPAG17	0.223486	94.7523	94.9758	0.997647
MDM4	0.120249	51.0531	51.1734	0.99765
SYNE2	0.186852	79.4081	79.5949	0.997652
CCDC181	0.243897	103.733	103.976	0.997654
SOAT1	0.217107	92.3481	92.5653	0.997655
COG5	0.0958836	40.8001	40.8959	0.997655
CMYA5	0.077514	33.0219	33.0994	0.997658
FTH1	0.274574	117.168	117.442	0.997662
TUBA1C	0.257908	110.167	110.425	0.997664
RPGRIP1	0.159398	68.2358	68.3952	0.997669
BRCA1	0.190061	81.8123	82.0023	0.997682
CROT	0.261658	112.713	112.974	0.997684
NAE1	0.242698	104.581	104.824	0.997685
KLHL8	0.14218	61.3062	61.4483	0.997686
CEP44	0.146264	63.2153	63.3616	0.997692
PLK1	0.191926	83.1558	83.3477	0.997697
PBRM1	0.0941597	40.8001	40.8942	0.997697
USP48	0.159179	69.0136	69.1728	0.997699
IRF8	0.252616	109.531	109.783	0.997699
LAMP2	0.342598	148.563	148.906	0.997699
SREK1	0.137318	59.6091	59.7464	0.997702
SMNDC1	0.166007	72.1249	72.2909	0.997704
PRDX1	0.284256	123.885	124.169	0.997711
FAM104A	0.171157	74.5998	74.7709	0.997711
WDHD1	0.137126	59.8212	59.9584	0.997713
UBFD1	0.258918	113.42	113.679	0.997722
PBK	0.32808	144.038	144.366	0.997727
CCDC88A	0.199267	87.5398	87.7391	0.997729
C29H11orf98	0.243581	107.197	107.441	0.997733
POC5	0.154826	68.3772	68.5321	0.997741
FMNL2	0.31636	139.724	140.041	0.997741
BTF3	0.235351	104.228	104.463	0.997747
RNF146	0.227972	100.975	101.203	0.997747
STIP1	0.197688	87.752	87.9496	0.997752
GTF2E2	0.142364	63.2153	63.3577	0.997753
MRPS10	0.208242	92.4896	92.6978	0.997754
CMAS	0.178743	79.4081	79.5868	0.997754
UHRF2	0.27758	123.532	123.809	0.997758
EPB41	0.145093	64.7003	64.8454	0.997762
PXK	0.12699	56.6393	56.7662	0.997763
CSGALNACT2	0.108994	48.6489	48.7579	0.997765
SLC30A9	0.16388	73.1856	73.3494	0.997766
UPF2	0.143585	64.1346	64.2782	0.997766
RNF2	0.142926	63.9225	64.0654	0.997769
KMT2C	0.12973	58.1949	58.3246	0.997776
ARL6IP1	0.194291	87.1863	87.3806	0.997776
LOC101904435	0.154761	69.65	69.8048	0.997783
PLAA	0.220011	99.2071	99.4271	0.997787
MLF1	0.173483	78.4889	78.6623	0.997795
IFT88	0.129305	58.6192	58.7485	0.997799
TOPORS	0.110333	50.0632	50.1735	0.997801
CLP1	0.118096	53.6694	53.7875	0.997804
THOC3	0.115697	52.6087	52.7244	0.997806
TANK	0.188407	85.7013	85.8897	0.997806
MLLT11	0.219295	99.7728	99.9921	0.997807
PGRMC1	0.140713	64.2053	64.346	0.997813
VPS35	0.153877	70.3571	70.511	0.997818
DDX10	0.163572	74.8119	74.9755	0.997818
PRDX2	0.259669	118.794	119.054	0.997819
EIF4E1B	0.279514	128.481	128.761	0.997829
GNPDA2	0.1987	91.3582	91.5569	0.99783
SQSTM1	0.407844	187.595	188.003	0.997831
TMEM87A	0.234392	108.117	108.351	0.997837
RPIA	0.188193	86.8327	87.0209	0.997837
WDR47	0.167811	77.6403	77.8081	0.997843
CENPV	0.384269	177.908	178.292	0.997845
RNPS1	0.160361	74.3169	74.4773	0.997847
TPR	0.119589	55.6493	55.7689	0.997856
CDC20	0.142325	66.2559	66.3982	0.997857
RAP1B	0.145032	67.8823	68.0273	0.997868
CCNG1	0.180376	84.4993	84.6796	0.99787
ADAM10	0.118024	55.2958	55.4138	0.99787
HSP90AA1	0.255871	120.067	120.323	0.997873
CDC42BPA	0.101638	47.9418	48.0435	0.997884
RAD51C	0.189916	89.5904	89.7803	0.997885
SVIL	0.161017	76.014	76.175	0.997886
RTCB	0.163386	77.1453	77.3087	0.997887
RDH11	0.146755	69.2965	69.4432	0.997887
CCT5	0.120663	56.9928	57.1135	0.997887
MTF2	0.108232	51.2652	51.3735	0.997893
BORA	0.234971	112.006	112.241	0.997907
MSMO1	0.214174	102.552	102.767	0.997916
SNRPF	0.259755	124.38	124.64	0.997916
PRRC2C	0.113797	54.5179	54.6317	0.997917
MKNK1	0.160725	77.4282	77.5889	0.997929
ORC3	0.210725	101.541	101.751	0.997929
GFPT1	0.166183	80.1859	80.3521	0.997932
RAD51	0.164335	79.6909	79.8553	0.997942
C1QBP	0.105282	51.2652	51.3705	0.997951
TTC1	0.22011	107.197	107.417	0.997951
GMCL1	0.138339	67.3873	67.5256	0.997951
NASP	0.1893	92.2774	92.4667	0.997953
HNRNPH3	0.189288	92.4896	92.6789	0.997958
SRP19	0.159646	78.1353	78.2949	0.997961
NAA30	0.215589	106.349	106.564	0.997977
SLC20A1	0.154212	76.1554	76.3096	0.997979
[truncated: 350 more rows]

## Sheet: Suppl_Fig.1_4-cell
label	SSwe	SSbe	SS	SSwe/SS
RPL12	0.863636	0.369896	1.23353	0.700132
ITGA2	0.65873	0.28208	0.940811	0.700173
NCKAP5L	0.607953	0.260217	0.868171	0.700269
ISL2	1.45414	0.622158	2.0763	0.700353
ANGEL1	0.662298	0.283313	0.945611	0.700391
URB1	1.01846	0.435395	1.45385	0.700523
FAM205C	1.63599	0.698689	2.33468	0.700734
CDYL2	0.895316	0.381919	1.27724	0.70098
MED9	0.874263	0.372928	1.24719	0.700985
LOC101906506	1.48683	0.63421	2.12104	0.700992
CXXC4	1.0618	0.452905	1.51471	0.700995
UGCG	1.13329	0.48321	1.6165	0.701076
GRIN3B	1.21713	0.518746	1.73588	0.701162
DUOX1	1.40552	0.598799	2.00432	0.701246
LOC100848492	1.75314	0.746894	2.50003	0.701246
PARP12	0.392265	0.167068	0.559332	0.701309
STYXL1	1.34613	0.5731	1.91923	0.701391
LOC509184	0.68394	0.291073	0.975014	0.701468
LOC101904715	0.55334	0.235357	0.788698	0.701587
PRKAR2B	1.43091	0.608581	2.03949	0.701602
RMDN2	1.43091	0.608581	2.03949	0.701602
LOC616149	1.46693	0.62361	2.09054	0.7017
TBC1D2B	0.408159	0.17343	0.581589	0.7018
TMUB1	0.879831	0.373784	1.25361	0.701835
TPRN	1.1585	0.492153	1.65065	0.701843
PEG3	1.0464	0.444099	1.4905	0.702046
MYO15A	0.877313	0.372223	1.24954	0.702111
AP1S2	1.32842	0.563349	1.89177	0.702211
EPHA10	1.73379	0.734847	2.46864	0.702327
RPL37	1.01402	0.429599	1.44362	0.702416
LOC786512	1.50741	0.638164	2.14557	0.702567
LIN7B	0.73535	0.311257	1.04661	0.702604
ZNF567	0.962386	0.407218	1.3696	0.702675
FBXL14	0.371881	0.157337	0.529218	0.7027
SHROOM1	1.37732	0.582672	1.95999	0.702717
DIP2A	1.60153	0.67711	2.27864	0.702845
IGFBPL1	1.34392	0.568089	1.91201	0.702884
DOLPP1	0.919017	0.388463	1.30748	0.702892
SOCS1	1.32667	0.56076	1.88743	0.702897
VSTM2B	1.71373	0.724356	2.43808	0.702899
ACAD10	1.00365	0.424183	1.42784	0.702919
LOC101902809	1.34782	0.569612	1.91743	0.70293
LOC112443172	0.332034	0.140312	0.472347	0.702947
BCL7A	0.561836	0.237403	0.799239	0.702964
GKAP1	0.814755	0.343943	1.1587	0.703164
PMP22	0.401489	0.169441	0.57093	0.703219
LOC101902029	0.986932	0.416497	1.40343	0.703229
GRSF1	0.689671	0.291015	0.980686	0.703253
N4BP3	1.28115	0.539781	1.82093	0.703569
UBE2J1	1.14536	0.482297	1.62766	0.703687
LOC112442055	1.45529	0.612372	2.06766	0.703833
SBK1	1.27042	0.534291	1.80472	0.703947
PIK3R2	1.35034	0.567613	1.91795	0.704052
YIPF1	0.680464	0.286001	0.966464	0.704075
EDEM1	0.531733	0.223468	0.755201	0.704094
C17H5orf52	1.06189	0.446051	1.50794	0.704198
FBXO11	1.74283	0.731925	2.47476	0.704244
TMEM117	0.626273	0.262945	0.889218	0.704296
HSF2	0.687389	0.288402	0.975791	0.704443
SRPX2	1.6862	0.707107	2.39331	0.704548
LOC101908812	1.66613	0.698689	2.36482	0.704549
RNPEPL1	1.99993	0.838525	2.83846	0.704584
KDM7A	0.589255	0.247058	0.836313	0.704587
CLCN2	1.27488	0.534291	1.80917	0.704675
WDR7	0.752578	0.315102	1.06768	0.704872
COL16A1	1.19508	0.500343	1.69542	0.704885
PTPRK	1.03584	0.433579	1.46942	0.704932
CAPS2	0.806033	0.3372	1.14323	0.705047
ENPP1	0.599262	0.250664	0.849926	0.705076
LOC112444763	0.991386	0.414578	1.40596	0.705129
C8H9orf3	0.337938	0.141303	0.479241	0.705153
LOC112443470	0.638915	0.267112	0.906027	0.705183
PPP1R1A	1.67294	0.698771	2.37171	0.705372
PGP	1.35321	0.565194	1.9184	0.705383
GLRX5	1.21665	0.508028	1.72468	0.705436
ZNF783	0.514465	0.214712	0.729176	0.705542
SPERT	1.6709	0.697217	2.36811	0.705581
LOC104974883	1.38058	0.576012	1.95659	0.705604
LOC112441478	1.09788	0.458012	1.55589	0.705627
LOC107132870	1.28727	0.53698	1.82425	0.705643
SC5D	0.505912	0.210969	0.71688	0.705713
LDB3	1.23221	0.51349	1.7457	0.705854
GXYLT2	1.21787	0.507134	1.725	0.70601
KCTD16	0.438754	0.182653	0.621407	0.706065
LOC107131509	1.62671	0.67711	2.30382	0.706093
ATP6V1D	0.485919	0.202198	0.688117	0.706158
ZNF300	0.364088	0.151388	0.515476	0.706313
MYCL	0.426074	0.177032	0.603106	0.706466
LOC112442386	1.38416	0.574644	1.9588	0.706635
FOXI1	1.04067	0.431958	1.47263	0.706676
LOC112447817	1.41504	0.586846	2.00188	0.706853
SDR39U1	0.951535	0.3946	1.34613	0.706864
MED26	0.910084	0.37736	1.28744	0.706892
TEX38	1.71868	0.71261	2.43129	0.706901
PSMB9	1.04625	0.433761	1.48001	0.706921
ZFP2	0.523204	0.216889	0.740093	0.706944
CTNNA2	0.463788	0.192079	0.655868	0.707137
KHK	0.569784	0.235864	0.805648	0.707237
BAAT	0.986321	0.408072	1.39439	0.707348
LOC101901898	0.562933	0.232774	0.795707	0.707462
ARHGEF33	0.64627	0.267213	0.913483	0.707479
LOC785287	1.34051	0.553889	1.8944	0.707618
TTC39B	0.537405	0.222028	0.759433	0.70764
PPARA	0.795078	0.328192	1.12327	0.707825
LYRM7	0.641839	0.26481	0.906649	0.707925
CACNA2D1	0.840014	0.346538	1.18655	0.707945
RINT1	0.476454	0.196457	0.672911	0.708049
LOC101904840	0.449707	0.185403	0.63511	0.708078
FZD8	1.17876	0.485913	1.66467	0.708103
LOC112448395	0.461775	0.190244	0.652019	0.708224
SNX31	1.66185	0.684653	2.3465	0.708224
UBQLN4	1.23072	0.506194	1.73692	0.708567
LOC104973929	1.69527	0.697217	2.39249	0.708581
IER2	1.69527	0.697217	2.39249	0.708581
PFAS	1.44155	0.592852	2.0344	0.708586
LOC101905049	1.8828	0.774267	2.65706	0.7086
MALSU1	1.76324	0.724356	2.4876	0.708813
POU3F2	1.76324	0.724356	2.4876	0.708813
TRIM45	0.973305	0.399293	1.3726	0.709097
NAALAD2	0.934299	0.383194	1.31749	0.709149
RPS26	0.58167	0.238507	0.820177	0.7092
SLC16A11	1.00694	0.412861	1.41981	0.709213
RUNX2	1.39131	0.57045	1.96176	0.709215
TBC1D1	0.626736	0.256953	0.883689	0.709227
MCMDC2	0.81573	0.334308	1.15004	0.709307
MID2	1.12322	0.460223	1.58344	0.709352
B3GALNT1	1.22061	0.5	1.72061	0.709406
FAT2	0.897938	0.367642	1.26558	0.709507
LOC112442991	0.679241	0.278092	0.957332	0.709514
ZNF677	0.412192	0.168758	0.58095	0.709514
SRGAP3	1.27849	0.523221	1.80171	0.709598
AMDHD2	1.40813	0.576012	1.98415	0.709693
ZC3H7B	1.44951	0.592655	2.04217	0.709791
TPGS1	1.44951	0.592655	2.04217	0.709791
RAB3B	1.5628	0.638877	2.20168	0.709823
SULT4A1	0.487365	0.199205	0.68657	0.709855
JMY	1.09132	0.446051	1.53737	0.709861
LOC526966	1.30602	0.533632	1.83966	0.709928
VWA2	0.383811	0.156773	0.540584	0.709993
SOCS2	0.598961	0.244498	0.843459	0.710124
LOC100848264	0.811517	0.331263	1.14278	0.710125
ZNF697	0.989971	0.403973	1.39394	0.710194
LOC112447727	0.925046	0.377412	1.30246	0.710231
FNIP2	0.510662	0.208292	0.718955	0.710285
CCDC36	0.694191	0.282843	0.977033	0.710509
DACT1	1.22204	0.497412	1.71945	0.710715
LOC101901963	1.7381	0.707107	2.44521	0.71082
SPATA16	1.94327	0.790569	2.73384	0.710821
IFNLR1	0.986042	0.401138	1.38718	0.710825
LOC100140695	1.99994	0.813116	2.81306	0.71095
CHAT	1.14376	0.464811	1.60857	0.711041
TMBIM7	1.23248	0.500472	1.73295	0.711202
TPCN2	1.1785	0.478429	1.65693	0.711255
SLC50A1	1.83995	0.746894	2.58684	0.711272
PANX1	0.46694	0.189477	0.656417	0.711346
PMCH	0.974862	0.395285	1.37015	0.711502
LOC112447393	1.44757	0.586846	2.03441	0.711541
EXOC3L1	0.701921	0.284497	0.986418	0.711586
TBC1D30	1.24057	0.502793	1.74337	0.711596
LOC100847189	0.653482	0.264739	0.918221	0.711682
LOC100140550	0.869234	0.352089	1.22132	0.711715
LOC112449556	1.4088	0.570513	1.97931	0.711762
SIK2	0.766643	0.310438	1.07708	0.711778
VMAC	0.636525	0.257743	0.894268	0.711784
EPHB4	1.57812	0.638877	2.21699	0.711827
LOC101902090	0.91151	0.368973	1.28048	0.711848
LOC101905588	0.589011	0.238273	0.827283	0.711982
MAP4K3	0.400292	0.161899	0.56219	0.712022
PPEF2	0.250464	0.101256	0.351721	0.712111
DPP10	0.990086	0.399935	1.39002	0.712281
WFIKKN2	1.43222	0.57805	2.01027	0.712451
LOC100335990	0.787013	0.31756	1.10457	0.712505
GNAS	0.44173	0.178208	0.619938	0.712539
KIAA1324	0.735318	0.296464	1.03178	0.712668
MEGF11	0.970578	0.39123	1.36181	0.712713
SUZ12	0.356682	0.143773	0.500455	0.712716
LOC101906870	1.27488	0.51349	1.78837	0.712873
GALNT1	0.472127	0.190061	0.662188	0.712981
LHPP	1.15409	0.464382	1.61847	0.713074
APOM	1.73329	0.697217	2.43051	0.713139
LOC112448559	1.31743	0.529728	1.84716	0.71322
LOC104974330	1.15849	0.465657	1.62414	0.713291
BLOC1S4	1.73813	0.697217	2.43535	0.71371
RNF148	0.943068	0.378242	1.32131	0.713737
CASC1	0.663368	0.266041	0.929409	0.713752
C2CD2	0.999257	0.400737	1.39999	0.713758
PBXIP1	0.994783	0.398913	1.3937	0.713773
LOC100847780	0.701504	0.281268	0.982772	0.713802
ZMYM1	0.57988	0.232168	0.812048	0.714096
GRM7	0.384299	0.153814	0.538114	0.71416
EFNB2	1.09034	0.436383	1.52672	0.71417
TMCO1	0.28123	0.112554	0.393784	0.714173
ZNF146	1.60846	0.643585	2.25204	0.714222
LOC781197	1.17835	0.471405	1.64975	0.714257
LOC112448396	1.59996	0.638877	2.23884	0.714639
IL-15L	1.59996	0.638877	2.23884	0.714639
C6H4orf19	1.25338	0.500472	1.75385	0.714643
MAB21L3	1.4155	0.565194	1.9807	0.714649
BORCS8	0.613202	0.244601	0.857802	0.714852
CAPN2	0.622422	0.248276	0.870698	0.714854
SAMD15	0.387647	0.154563	0.54221	0.714939
RND2	0.570714	0.227397	0.79811	0.715081
LOC101904592	1.13157	0.450792	1.58237	0.715115
2024-03-09	0.524891	0.208889	0.733781	0.715325
LOC107131350	1.25787	0.500343	1.75821	0.715425
CELSR1	1.75314	0.697217	2.45036	0.715463
LOC101905357	1.46712	0.583298	2.05041	0.715522
GFOD1	0.65716	0.261271	0.918431	0.715524
IRF2BP1	0.891619	0.353779	1.2454	0.715931
LOC112442287	1.40891	0.559017	1.96793	0.715937
TTC32	0.344361	0.136557	0.480918	0.716049
NPTX2	0.844627	0.334863	1.17949	0.716095
UQCR11	1.54468	0.612372	2.15705	0.716107
LOC104973172	0.42503	0.168486	0.593516	0.716123
LOC104970589	1.5942	0.631906	2.2261	0.716138
LOC101905114	1.5942	0.631906	2.2261	0.716138
BIVM	0.837753	0.331982	1.16974	0.71619
RUNX1	1.4828	0.587359	2.07016	0.716274
KDM4B	0.805351	0.318963	1.12431	0.716304
FDX1	1.14905	0.454905	1.60396	0.716386
JOSD2	1.83088	0.724356	2.55524	0.716521
PLA2G16	0.532654	0.210636	0.74329	0.716616
HABP4	1.62434	0.641839	2.26617	0.716774
TMC5	0.534306	0.210816	0.745123	0.717072
LOC101906292	0.690407	0.271992	0.962399	0.717381
CCDC61	0.875789	0.344939	1.22073	0.717431
GTPBP10	0.483827	0.190494	0.674321	0.717503
NEURL4	0.654005	0.257402	0.911407	0.717578
MAVS	0.749064	0.294739	1.0438	0.71763
LOC783838	1.66469	0.654766	2.31946	0.717707
RCOR3	0.663258	0.26082	0.924078	0.717751
DNAJC24	1.48755	0.583298	2.07085	0.718329
PUS10	0.450419	0.176458	0.626878	0.718513
EBPL	1.0402	0.407488	1.44768	0.718525
LOC101907713	0.970911	0.3803	1.35121	0.718549
SLC25A1	0.710839	0.278343	0.989182	0.718613
LOC101905499	1.31882	0.516016	1.83483	0.718767
LOC101906312	1.91735	0.749753	2.66711	0.718889
BOLA-DMA	0.674781	0.263718	0.938499	0.719
UBALD2	1.51715	0.592655	2.10981	0.719095
IFT172	0.860333	0.335643	1.19598	0.719357
NPHP3	1.10861	0.432413	1.54103	0.7194
ELAVL3	0.604377	0.235702	0.840079	0.719429
CYP4V2	1.62183	0.632456	2.25428	0.719443
LZTS3	1.50498	0.586846	2.09182	0.719457
CNPY1	0.799046	0.311467	1.11051	0.719528
ATP5ME	0.672748	0.262202	0.93495	0.719555
CLDN20	0.440053	0.171376	0.611429	0.719712
GPR34	1.70023	0.661438	2.36167	0.719928
RBM15B	0.553672	0.215385	0.769056	0.719936
RAB22A	0.807541	0.313956	1.1215	0.720056
LOC101906001	1.50142	0.583298	2.08471	0.720202
KIAA0040	0.788336	0.306186	1.09452	0.720256
PLK5	0.734209	0.285156	1.01936	0.720261
LOC112447119	1.35717	0.527046	1.88421	0.720283
TAOK2	0.671316	0.260579	0.931895	0.720378
DNPH1	0.661967	0.256934	0.918901	0.72039
COLCA2	0.399113	0.154744	0.553857	0.720607
EDEM3	0.343182	0.132911	0.476092	0.72083
TOMM5	0.424752	0.164322	0.589073	0.721051
PICK1	0.776151	0.300046	1.0762	0.721198
DCDC2C	1.15993	0.448211	1.60814	0.721286
MORN2	0.509271	0.196705	0.705976	0.721371
ZNF341	1.06004	0.409371	1.46942	0.721405
LOC104969173	1.31236	0.506194	1.81855	0.72165
LEKR1	1.14793	0.441942	1.58987	0.722026
TPPP	1.10435	0.424957	1.52931	0.722124
NRXN2	1.21039	0.465657	1.67605	0.722169
VSTM2A	0.731687	0.281389	1.01308	0.722243
GPR27	1.25006	0.480634	1.73069	0.722288
LOC112449526	1.59419	0.612372	2.20657	0.722477
FBXO28	1.59419	0.612372	2.20657	0.722477
FAM213B	1.59419	0.612372	2.20657	0.722477
AK6	0.585582	0.224755	0.810336	0.72264
UBXN8	0.290457	0.11147	0.401927	0.722662
PSMA1	1.76565	0.677484	2.44313	0.722698
ZDHHC12	0.493921	0.189511	0.683432	0.722706
MRPL35	0.604204	0.231793	0.835996	0.722735
LOC107132924	0.723749	0.277612	1.00136	0.722765
LOC100849050	1.38154	0.529728	1.91127	0.722839
NLRC4	0.938572	0.359715	1.29829	0.722931
CAMK2D	0.331378	0.127002	0.458379	0.722934
BORCS6	0.959092	0.367573	1.32666	0.722935
TMEM47	1.53029	0.586302	2.11659	0.722997
LOC112448851	1.58859	0.608581	2.19717	0.723017
MYOC	0.967321	0.369911	1.33723	0.723376
C25H16orf71	0.856115	0.327229	1.18334	0.723471
FAM193B	1.48013	0.565685	2.04582	0.723492
POLR3G	0.234191	0.0893391	0.32353	0.723862
CAMKK1	1.41956	0.541489	1.96105	0.723878
SYNGR3	0.921353	0.351364	1.27272	0.723926
IFT80	0.553042	0.210892	0.763934	0.723939
NKAIN2	1.37134	0.522913	1.89425	0.723948
MAPK8IP2	1.46609	0.559017	2.02511	0.723957
GNG10	0.246948	0.0941484	0.341097	0.723983
FAM110C	1.85526	0.707107	2.56237	0.724041
ABTB2	0.497934	0.189737	0.687671	0.724088
GMIP	0.566554	0.215865	0.782419	0.724106
FRAT1	0.979252	0.372918	1.35217	0.724208
REPS2	0.862072	0.328254	1.19033	0.724232
GDAP1	0.296673	0.112946	0.409619	0.724265
LOC101902172	0.728727	0.277211	1.00594	0.724426
MAST1	1.59997	0.608581	2.20855	0.724444
LOC104968434	1.35077	0.51349	1.86426	0.724561
LOC112446462	1.35751	0.516016	1.87352	0.724575
LOC104971503	1.2305	0.467707	1.69821	0.724588
DUSP5	1.04093	0.395646	1.43658	0.724591
EHHADH	1.54469	0.586846	2.13154	0.724684
SLC20A2	0.708091	0.268646	0.976737	0.724956
ODF3L2	1.47389	0.559017	2.0329	0.725016
FBXO44	0.8014	0.303664	1.10506	0.725207
C23H6orf62	0.590846	0.223818	0.814664	0.725263
KLHL40	1.52067	0.576012	2.09668	0.725274
LOC101903685	0.842573	0.318816	1.16139	0.725487
FAM228B	0.715549	0.270437	0.985986	0.725719
LOC107131471	1.51717	0.573341	2.09051	0.725742
LOC509283	1.54217	0.582694	2.12487	0.725773
CYR61	1.56905	0.592655	2.16171	0.72584
LOC112446451	1.56905	0.592655	2.16171	0.72584
ANKRD37	1.56905	0.592655	2.16171	0.72584
SIRT1	0.508299	0.191901	0.700201	0.725934
PLCXD3	0.805925	0.30408	1.11	0.726055
LBH	0.572293	0.215906	0.7882	0.726077
LOC107131315	0.466617	0.176025	0.642642	0.726092
ODAPH	1.11971	0.422164	1.54187	0.726201
FAM49A	1.05784	0.398684	1.45652	0.726277
DYDC1	0.781549	0.294392	1.07594	0.726386
TIMM10B	1.21586	0.457985	1.67385	0.726388
ARFRP1	0.951595	0.35843	1.31003	0.726394
MOB2	1.08181	0.40745	1.48926	0.726407
PTHLH	1.65603	0.62361	2.27964	0.726444
HMGCL	1.25218	0.471405	1.72358	0.726497
ZNF667	0.670039	0.251987	0.922025	0.726703
CFAP54	1.2154	0.456885	1.67229	0.72679
TPC3	1.85527	0.697217	2.55248	0.726848
ACAP1	0.669447	0.25147	0.920917	0.726935
BTG1	0.581277	0.218228	0.799505	0.727046
PIGQ	1.48098	0.555845	2.03682	0.727102
UBN2	0.709883	0.265897	0.97578	0.727503
LOC112443479	1.28819	0.482473	1.77067	0.727519
PRKD1	0.463106	0.17334	0.636446	0.727643
LOC112448155	1.26924	0.475073	1.74432	0.727645
SNURF	1.54774	0.579241	2.12698	0.72767
C7H19orf44	0.441455	0.165172	0.606627	0.727721
ZNF311	0.78749	0.294579	1.08207	0.727763
ZNF70	1.77318	0.662954	2.43613	0.727866
HTR1F	1.62673	0.607789	2.23451	0.728
MSI2	1.41971	0.53033	1.95004	0.728042
NAA25	0.459039	0.171219	0.630258	0.728335
LOC100847890	0.728308	0.271633	0.999941	0.728351
ABHD17C	0.716766	0.26693	0.983697	0.728646
LOC100848570	1.19927	0.446282	1.64555	0.728794
LOC781224	0.768129	0.285714	1.05384	0.728883
NANOS1	0.892235	0.331851	1.22409	0.728899
RDH13	1.34569	0.500343	1.84604	0.728964
CYP2D14	1.26797	0.471405	1.73937	0.72898
JADE2	1.43733	0.534291	1.97162	0.729009
CRYM	0.871658	0.323942	1.1956	0.729055
FAM149A	0.546976	0.203164	0.75014	0.729166
LOC112449363	0.91664	0.34034	1.25698	0.72924
CXHXorf38	0.780699	0.289778	1.07048	0.7293
HYKK	0.699058	0.259433	0.958491	0.729331
ZRANB1	0.641714	0.238088	0.879803	0.729384
LOC112444636	1.6507	0.612372	2.26308	0.729407
FGFR1	0.4084	0.15146	0.559859	0.729468
LOC112448430	1.42862	0.529728	1.95834	0.729502
LDB1	0.445163	0.164828	0.60999	0.729787
SNRPN	0.99566	0.368632	1.36429	0.7298
RNF7	0.3187	0.117914	0.436613	0.729936
KCNH4	1.60304	0.592852	2.1959	0.730018
RASSF5	1.12756	0.416996	1.54456	0.730022
CCDC30	1.1275	0.416745	1.54424	0.730129
RAPSN	1.24126	0.457985	1.69924	0.730477
ZZEF1	0.508725	0.187684	0.696408	0.730497
LOC100337053	1.91735	0.707107	2.62446	0.730571
ZNF391	0.559125	0.206165	0.76529	0.730606
SLC35F1	0.759084	0.279809	1.03889	0.730666
TMEM249	1.73327	0.638877	2.37214	0.730675
LOC112442057	1.73327	0.638877	2.37214	0.730675
RPL38	1.73327	0.638877	2.37214	0.730675
ZFP36	0.418596	0.154269	0.572865	0.730706
CP	1.66183	0.612372	2.27421	0.730731
LOC112445030	1.39554	0.51349	1.90903	0.73102
PTPRF	0.813496	0.299324	1.11282	0.731022
ZMIZ2	0.639601	0.235282	0.874883	0.731071
KSR1	0.72661	0.267261	0.993872	0.731091
UHRF1BP1	0.61423	0.22592	0.840149	0.731096
PUS7	1.42439	0.523548	1.94794	0.73123
LOC107132213	0.952426	0.349669	1.30209	0.731457
PKHD1L1	0.806767	0.296004	1.10277	0.731581
DPM3	0.968117	0.355005	1.32312	0.731691
TPRG1	0.820839	0.300971	1.12181	0.73171
PTMS	0.658712	0.241518	0.90023	0.731716
SPPL3	0.580346	0.212767	0.793113	0.731732
DENR	0.624472	0.228895	0.853368	0.731774
WNK2	0.706982	0.259131	0.966113	0.73178
FRK	1.66186	0.608581	2.27044	0.731954
SMAD6	1.61857	0.592655	2.21122	0.731979
LOC101906866	1.43941	0.527046	1.96646	0.731982
NUTM1	0.827577	0.302917	1.13049	0.732049
LOC515578	0.795775	0.290881	1.08666	0.732316
MNT	1.07038	0.39123	1.46161	0.73233
SELENOM	1.07138	0.391573	1.46296	0.732341
C14H8orf89	0.717236	0.262109	0.979345	0.732363
RYR2	0.933813	0.341137	1.27495	0.732431
LOC104976293	1.08212	0.394911	1.47703	0.732632
GANC	0.63773	0.232543	0.870273	0.732793
DPP6	0.557931	0.203312	0.761243	0.732921
GOT1L1	1.24666	0.454263	1.70092	0.732931
SCO2	0.787947	0.287095	1.07504	0.732945
LOC104974542	1.51194	0.550685	2.06263	0.733017
OLFML2A	1.4477	0.527046	1.97475	0.733107
LOC112444762	1.09693	0.399293	1.49623	0.733134
LOC104968435	0.668977	0.24351	0.912487	0.733136
NCKAP1L	1.32212	0.481042	1.80316	0.733223
PRR16	0.841232	0.305962	1.14719	0.733295
LOC104971058	1.45836	0.53033	1.98869	0.733327
LOC101907577	0.946477	0.34401	1.29049	0.733426
TPH2	1.11896	0.406558	1.52552	0.733495
ADAMTS17	0.932169	0.338531	1.2707	0.733587
AFG1L	0.522928	0.18988	0.712808	0.733617
LAD1	0.682775	0.24781	0.930584	0.733705
GPR153	1.3952	0.506194	1.90139	0.733777
LOC107132977	1.39528	0.506194	1.90147	0.733788
DFFB	1.41878	0.514077	1.93286	0.734033
GPRC5B	1.99994	0.724356	2.7243	0.734113
MELTF	1.99994	0.724356	2.7243	0.734113
THY1	1.99994	0.724356	2.7243	0.734113
RGS17	0.963905	0.349033	1.31294	0.734159
LOC101904947	1.42515	0.516016	1.94116	0.734172
LOC112444622	0.86771	0.314169	1.18188	0.734179
KPNA4	1.15244	0.416497	1.56893	0.734535
MYLPF	1.45858	0.527046	1.98563	0.73457
ZNF12	1.06526	0.3849	1.45016	0.734581
ADGRG6	1.78354	0.644379	2.42792	0.734596
ADGRG5	1.47047	0.531227	2.0017	0.734612
LOC112441511	0.905673	0.327038	1.23271	0.7347
CD44	0.487684	0.176041	0.663725	0.734768
LOC101907327	0.910976	0.327849	1.23883	0.735355
MTMR11	0.701875	0.252497	0.954372	0.735432
SPRYD4	0.7184	0.258241	0.976642	0.735582
CACNG3	1.45535	0.522957	1.97831	0.735655
YRDC	1.25388	0.450264	1.70414	0.735782
CNTN4	1.67135	0.600092	2.27144	0.73581
DZANK1	1.27127	0.456435	1.72771	0.735814
LOC104974619	0.858697	0.308221	1.16692	0.735868
CMIP	0.698591	0.250562	0.949153	0.736015
DOCK10	0.657523	0.235702	0.893225	0.736122
FBLN1	1.55949	0.559017	2.1185	0.736126
LOC514891	0.989592	0.354604	1.3442	0.736196
LMNTD2	1.47194	0.527046	1.99899	0.736344
SLC6A1	1.38238	0.494872	1.87725	0.736384
SIRT5	0.408611	0.146264	0.554875	0.736402
PCYOX1	1.71374	0.612372	2.32611	0.736739
HOXC4	1.4471	0.516178	1.96328	0.737084
LOC112444164	1.32312	0.471405	1.79452	0.737309
L3MBTL3	0.393153	0.140017	0.533169	0.737388
KLHDC7B	0.944848	0.336454	1.2813	0.737412
FKTN	0.436401	0.155299	0.591701	0.737537
LRRK1	1.02302	0.363636	1.38666	0.73776
HIST1H1E	0.372129	0.132151	0.50428	0.737941
GTF2IRD2	1.19385	0.423896	1.61775	0.737972
IKZF5	0.56811	0.201659	0.76977	0.738026
PTPN12	0.524472	0.186155	0.710627	0.738041
ARID2	0.326771	0.115746	0.442517	0.738437
LOC107132475	1.01947	0.360992	1.38046	0.738499
VOPP1	1.42983	0.506194	1.93602	0.738539
LOC112443158	1.02799	0.363765	1.39176	0.738629
TEAD2	0.706887	0.24993	0.956817	0.73879
TTC23	1.99994	0.707107	2.70705	0.738791
RALGPS1	0.57225	0.202305	0.774555	0.738811
ZFP41	0.531628	0.187642	0.71927	0.739121
GNPTAB	0.636561	0.224652	0.861213	0.739145
LZTS2	0.788398	0.278079	1.06648	0.739255
LOC101904827	1.16082	0.409371	1.5702	0.739286
SFRP1	0.600874	0.211813	0.812687	0.739367
BARX1	1.11651	0.393475	1.50999	0.739418
LOC530973	0.697695	0.245853	0.943549	0.739437
2024-03-10	1.41349	0.49793	1.91142	0.739497
LOC112447400	1.32802	0.467707	1.79572	0.739544
TMEM64	0.896462	0.315583	1.21204	0.739628
LOC101906754	1.90283	0.668977	2.57181	0.739881
LOC101904377	1.68621	0.592655	2.27886	0.739934
TMEM262	0.939859	0.32969	1.26955	0.740309
FAM135B	1.20135	0.421271	1.62262	0.740377
CATSPERD	0.983625	0.344676	1.3283	0.740514
LOC101908339	1.51192	0.529728	2.04165	0.740539
STON1	0.529766	0.185575	0.71534	0.740579
TIMM8B	0.488424	0.171043	0.659467	0.740635
LOC112444771	1.46694	0.51349	1.98043	0.740718
LZTR1	1.46694	0.51349	1.98043	0.740718
MTCL1	1.05285	0.368514	1.42136	0.740731
POLR3GL	0.931406	0.325994	1.2574	0.74074
KLF11	0.633789	0.221744	0.855534	0.740812
CARNMT1	0.457632	0.159998	0.61763	0.740948
CCDC42	0.744712	0.260217	1.00493	0.741059
CIB3	1.59994	0.559017	2.15895	0.74107
LOC112447309	1.59994	0.559017	2.15895	0.74107
ODF1	1.59994	0.559017	2.15895	0.74107
LOC101903713	1.59994	0.559017	2.15895	0.74107
LOC101906177	1.59994	0.559017	2.15895	0.74107
LOC112447764	1.59994	0.559017	2.15895	0.74107
LOC101907000	1.59994	0.559017	2.15895	0.74107
LOC101907929	1.59994	0.559017	2.15895	0.74107
GDNF	1.59994	0.559017	2.15895	0.74107
LOC104968964	1.59994	0.559017	2.15895	0.74107
LOC107132175	1.59994	0.559017	2.15895	0.74107
LOC112444320	1.59994	0.559017	2.15895	0.74107
FAM155A	1.59994	0.559017	2.15895	0.74107
GJB1	1.59994	0.559017	2.15895	0.74107
GRIK5	1.59994	0.559017	2.15895	0.74107
SGCE	0.607298	0.211944	0.819241	0.741293
CD226	1.50144	0.523548	2.02499	0.741456
HIGD1C	0.347472	0.120965	0.468437	0.741769
C2CD3	0.600809	0.209153	0.809961	0.741775
LOC614129	0.952303	0.330719	1.28302	0.742234
LOC507787	1.18892	0.412861	1.60178	0.742249
SVIP	0.234871	0.0815481	0.316419	0.742278
RPUSD1	0.631842	0.219359	0.851201	0.742295
LOC790271	1.06524	0.369046	1.43428	0.742696
LOC112447332	1.61613	0.559017	2.17515	0.742999
LOC104975042	1.46427	0.506194	1.97046	0.743109
GHR	1.51587	0.523221	2.03909	0.743405
SCN2A	1.53528	0.529728	2.06501	0.743474
KIAA1211	1.44392	0.49793	1.94185	0.74358
SYDE1	1.36533	0.470751	1.83608	0.743611
IRF2BPL	1.46957	0.506194	1.97576	0.743798
LOC527981	0.686756	0.236551	0.923307	0.743801
SLC38A3	0.667178	0.229803	0.896981	0.743804
CHTF18	0.742056	0.255554	0.997609	0.743834
STK17B	1.24661	0.429307	1.67592	0.743838
LOC112445972	1.85525	0.638877	2.49412	0.743847
SAMD4A	0.983122	0.338401	1.32152	0.743931
CRTC1	0.638759	0.219694	0.858453	0.744082
TTC30B	0.62164	0.213264	0.834904	0.744565
LOC101907642	0.766833	0.263067	1.0299	0.744571
LMNB1	0.329325	0.112951	0.442276	0.744614
LOC614732	0.742939	0.254711	0.997651	0.744689
YPEL4	0.791451	0.271303	1.06275	0.744717
LOC101906347	1.37564	0.471405	1.84705	0.744779
LOC112447350	1.3653	0.467707	1.83301	0.744842
KLRG2	1.15377	0.3946	1.54837	0.74515
MRPL40	1.23557	0.422284	1.65785	0.745282
LOC100847171	1.24037	0.423774	1.66414	0.74535
MYO3A	1.68622	0.576012	2.26224	0.745379
FANCA	0.756208	0.25824	1.01445	0.745438
SLC24A4	0.855934	0.292107	1.14804	0.74556
AK1	1.11523	0.3803	1.49553	0.745709
TNFAIP3	1.73811	0.592655	2.33077	0.745725
TSC22D3	1.73811	0.592655	2.33077	0.745725
GZMM	1.5891	0.541489	2.13059	0.74585
MEX3B	0.979069	0.333333	1.3124	0.746013
LOC100848212	0.801298	0.271954	1.07325	0.746607
ZSWIM1	1.4776	0.501463	1.97906	0.746616
B3GALT4	1.40001	0.475073	1.87508	0.746638
SERINC2	1.32218	0.448211	1.7704	0.74683
RBM24	1.20512	0.408248	1.61337	0.746959
ATCAY	0.626499	0.212167	0.838665	0.747018
ASS1	1.45348	0.492153	1.94563	0.747047
LOC104973643	0.82736	0.280037	1.1074	0.747121
LOC101910047	1.17687	0.397828	1.5747	0.747362
RSRP1	1.60772	0.542941	2.15066	0.747547
HPD	1.37945	0.465657	1.8451	0.747625
FSBP	0.233206	0.0787212	0.311927	0.747629
LOC104971369	0.988531	0.333333	1.32186	0.747831
PXT1	0.800994	0.270009	1.071	0.747891
RNF125	0.73243	0.24682	0.97925	0.74795
TMEFF1	0.49028	0.165204	0.655484	0.747967
SUFU	1.73378	0.583298	2.31708	0.748261
LOC101902504	0.918776	0.309008	1.22778	0.74832
RPL36AL	0.798812	0.267508	1.06632	0.74913
TMEM171	0.591945	0.198175	0.79012	0.749183
LOC112447482	1.22447	0.409371	1.63384	0.749443
GPR176	1.83558	0.612372	2.44795	0.749843
VSTM5	1.49279	0.49793	1.99072	0.749874
LYN	0.946252	0.315583	1.26183	0.749902
NSUN4	0.749755	0.249926	0.99968	0.749994
LOC101907747	0.634499	0.211273	0.845772	0.750201
GSTZ1	1.1756	0.39123	1.56683	0.750305
C8B	0.676812	0.225227	0.902039	0.750314
B3GNT5	1.01112	0.336454	1.34757	0.750325
HCN2	0.833335	0.277211	1.11055	0.750383
NQO2	0.639145	0.212589	0.851734	0.750405
DTX3L	0.843894	0.280405	1.1243	0.750595
SOX11	0.636746	0.211549	0.848295	0.750618
LOC101903205	1.10632	0.36748	1.4738	0.750658
LOC515551	0.503218	0.167104	0.670322	0.750712
ZBTB4	1.6862	0.559017	2.24521	0.751018
LOC101907654	1.68621	0.559017	2.24523	0.75102
LOC112441775	1.36283	0.451656	1.81448	0.751083
B3GALT6	0.380881	0.125789	0.50667	0.751735
HAPLN4	0.71828	0.237203	0.955483	0.751746
NMB	1.06741	0.352389	1.4198	0.751804
HECA	0.848167	0.279836	1.128	0.751919
NINL	0.966891	0.318816	1.28571	0.752031
LHFPL4	1.15405	0.3803	1.53435	0.752142
B4GALT2	0.959867	0.315663	1.27553	0.752524
C14H8orf82	1.07412	0.353152	1.42728	0.752569
EIF2B2	0.400428	0.131581	0.532009	0.752672
IRAK3	1.34546	0.441942	1.7874	0.752746
LRRC63	1.56592	0.51349	2.07941	0.753059
LOC785745	1.44952	0.475073	1.92459	0.753157
LOC101902930	1.44952	0.475073	1.92459	0.753157
PLCB3	1.27278	0.416913	1.68969	0.753261
GAS2	0.517516	0.1695	0.687017	0.75328
CRTAP	0.774723	0.253533	1.02826	0.753434
ZNRF2	0.528541	0.17269	0.701232	0.753733
DRD3	0.968066	0.316228	1.28429	0.753773
AGO2	0.456488	0.149069	0.605558	0.753831
CELF2	1.01153	0.330146	1.34168	0.75393
TMEM123	0.686158	0.223727	0.909885	0.754115
GAS1	1.21547	0.395285	1.61076	0.754597
TGFB1I1	1.37178	0.446051	1.81783	0.754624
CRYL1	0.717989	0.233441	0.951429	0.754642
LEAP2	0.571546	0.185659	0.757205	0.75481
ARSA	1.17708	0.382204	1.55929	0.754885
ZNF451	0.643362	0.208555	0.851918	0.755193
FBRSL1	0.611395	0.19799	0.809384	0.755382
DPY19L1	0.763609	0.247179	1.01079	0.75546
LOC104969366	1.11552	0.360992	1.47651	0.75551
HSD3B1	1.43344	0.463512	1.89696	0.755655
LOC782951	0.540113	0.174592	0.714705	0.755714
ANKIB1	0.436586	0.140987	0.577572	0.755898
LOC783497	1.26229	0.40745	1.66974	0.75598
SIX3	0.275601	0.0889444	0.364545	0.756013
LOC101902385	1.47707	0.47628	1.95335	0.756172
LOC112442028	1.56907	0.504608	2.07368	0.75666
TCP11L2	0.519446	0.16689	0.686336	0.756839
LOC107131684	1.27036	0.40745	1.67781	0.757154
HECW2	1.45191	0.465657	1.91757	0.757162
RPS6KA2	1.10131	0.353152	1.45446	0.757194
ZSWIM6	1.55949	0.5	2.05949	0.757222
PSME4	0.39293	0.1259	0.51883	0.757339
LOC112448547	1.08651	0.3481	1.43461	0.757356
CTLA4	1.99996	0.640434	2.64039	0.757447
CACNG5	1.60363	0.51349	2.11712	0.757458
LOC101906828	1.40787	0.450792	1.85867	0.757465
UROC1	1.01418	0.324007	1.33819	0.757877
EHD2	1.99993	0.638877	2.63881	0.757892
PLD1	1.54154	0.492153	2.0337	0.758001
LOC101903427	1.14196	0.364434	1.5064	0.758075
CORO7	1.25355	0.4	1.65355	0.758097
PTGFRN	0.649793	0.20731	0.857103	0.758127
CGAS	0.91937	0.293295	1.21266	0.75814
TULP1	1.83996	0.586846	2.42681	0.758182
KIAA1671	1.32747	0.42304	1.75051	0.758333
MAGEB1	1.26799	0.404061	1.67205	0.758343
MRO	1.04764	0.333784	1.38143	0.758377
LOC112444209	0.740363	0.235679	0.976042	0.758536
DAPK2	1.18879	0.377964	1.56675	0.758759
ADCY6	0.648977	0.206155	0.855132	0.75892
SPATA7	1.36415	0.433013	1.79716	0.759057
LOC112447135	1.83996	0.583298	2.42326	0.759292
MADCAM1	0.656131	0.20787	0.864001	0.75941
EAF2	1.26714	0.400737	1.66788	0.759732
MEF2C	0.221149	0.0699303	0.291079	0.759755
NCS1	1.49149	0.471405	1.9629	0.759843
ANKS3	1.17275	0.370639	1.54339	0.759853
LOC112443850	1.67091	0.527046	2.19795	0.76021
LOC101907978	1.18182	0.372678	1.5545	0.760258
LOC107132656	0.699936	0.2206	0.920537	0.760357
EARS2	0.725871	0.228711	0.954582	0.760407
LOC112447387	1.08981	0.343116	1.43292	0.760548
LOC526745	1.88279	0.592655	2.47545	0.760587
SP6	0.773091	0.242956	1.01605	0.760881
SH3PXD2A	0.639549	0.20079	0.840339	0.761061
DRAXIN	0.736418	0.23094	0.967358	0.761267
LOC112445080	1.70417	0.534291	2.23846	0.761313
C11H9orf16	0.661992	0.207211	0.869203	0.761608
DGKQ	1.69528	0.529728	2.22501	0.761921
FZD5	0.732392	0.22877	0.961162	0.761986
LOC101902665	1.5942	0.49793	2.09213	0.761999
TFAP4	1.28328	0.400737	1.68401	0.762035
LOC101902030	1.25051	0.390326	1.64084	0.762118
LOC104969267	0.630098	0.196279	0.826378	0.762482
TSC22D1	0.872774	0.27179	1.14456	0.762538
SH2B2	1.69528	0.527046	2.22233	0.76284
HAPLN1	1.08325	0.336406	1.41965	0.763037
CAP2	0.615094	0.190997	0.806091	0.763058
SRF	1.19308	0.369911	1.56299	0.763331
PROCR	1.54096	0.475073	2.01604	0.764353
DNAAF3	1.44744	0.446051	1.8935	0.76443
LOC112447785	0.958677	0.295357	1.25403	0.764474
FBXL2	1.42438	0.438529	1.86291	0.7646
GCKR	0.517193	0.15917	0.676363	0.764668
RAB12	0.983018	0.301381	1.2844	0.765353
LOC101908205	1.3894	0.425918	1.81532	0.765376
LOC787269	1.16268	0.356413	1.51909	0.765378
ACBD6	1.51715	0.464811	1.98196	0.765479
LOC100335729	1.45615	0.446051	1.9022	0.765508
PLPP4	1.30882	0.400737	1.70955	0.765589
GART	0.726853	0.222373	0.949226	0.765732
ITGAV	1.39003	0.423896	1.81392	0.76631
SPAG1	0.987116	0.301009	1.28813	0.76632
ALG5	0.61651	0.187492	0.804003	0.766801
FGD2	0.511805	0.155627	0.667432	0.766827
ACADL	0.964568	0.293151	1.25772	0.766919
METTL25	1.15297	0.350161	1.50313	0.767046
PRSS42	1.31715	0.4	1.71715	0.767056
LOC508916	0.897756	0.272166	1.16992	0.767364
IDH2	1.56906	0.475073	2.04413	0.767592
TMEM198	0.562455	0.16988	0.732335	0.76803
MMD	0.911742	0.275316	1.18706	0.768068
LOC112443237	1.03364	0.311805	1.34544	0.768252
LOC787679	0.717205	0.216261	0.933465	0.768325
C1H21orf2	1.43421	0.432413	1.86663	0.768345
LOC112442950	1.85525	0.559017	2.41427	0.768453
THEM5	1.85525	0.559017	2.41427	0.768453
RNF222	1.85525	0.559017	2.41427	0.768453
SMO	1.85528	0.559017	2.4143	0.768456
GTF2H4	0.452877	0.136054	0.588931	0.768982
LOC107132618	0.618494	0.185744	0.804238	0.769043
SUMF2	0.883293	0.264575	1.14787	0.769507
SPA17	0.620819	0.185744	0.806563	0.769709
CDK15	0.886561	0.265165	1.15173	0.769767
DBP	1.37654	0.411102	1.78764	0.770031
CNTN3	1.05256	0.31427	1.36683	0.770074
LOC104975006	0.82372	0.245872	1.06959	0.770125
GFY	0.835509	0.249259	1.08477	0.770219
LOC614269	0.931731	0.27783	1.20956	0.770305
RBMS1	0.363507	0.108362	0.471869	0.770356
NLGN1	1.47146	0.438529	1.90999	0.770402
LOC112444621	1.5942	0.475073	2.06928	0.770416
CCL28	1.56281	0.464811	2.02763	0.770761
LOC104968993	1.15101	0.342327	1.49334	0.770764
LOC112447496	1.56423	0.464811	2.02904	0.77092
LOC104972855	1.56423	0.464811	2.02904	0.77092
PEG10	0.902923	0.268214	1.17114	0.77098
NPM3	0.613249	0.182073	0.795321	0.77107
FAM53B	1.0401	0.308776	1.34888	0.771086
LOC104975683	0.714593	0.212132	0.926725	0.771095
GBA	1.22926	0.364434	1.59369	0.771327
SLC9A3	1.47211	0.436383	1.90849	0.771347
RPL22L1	1.13287	0.335179	1.46805	0.771685
SLC27A2	0.785773	0.232336	1.01811	0.771796
ILK	1.01924	0.301104	1.32035	0.771951
CRYAB	1.7106	0.504608	2.21521	0.772207
ZNF383	0.890011	0.262487	1.1525	0.772245
LOC528518	1.58593	0.467707	2.05364	0.772254
CERKL	1.03909	0.306087	1.34518	0.772457
BRF1	1.57813	0.464811	2.04294	0.772479
CHST11	0.998871	0.293887	1.29276	0.772667
NUDT18	0.992809	0.292061	1.28487	0.772692
LOC112441527	1.5841	0.465657	2.04976	0.772823
RAB21	0.785234	0.230517	1.01575	0.773058
EFHD2	1.19123	0.349684	1.54092	0.773067
DLGAP1	1.17274	0.34401	1.51675	0.773192
PLOD3	0.892674	0.261456	1.15413	0.77346
CCSAP	0.633854	0.185566	0.81942	0.77354
ANKRD9	1.71058	0.5	2.21058	0.773815
YTHDF1	0.459197	0.134222	0.593419	0.773815
CCDC168	1.44132	0.421271	1.86259	0.773825
FKBP1B	1.02773	0.300122	1.32785	0.773979
MEX3D	0.71888	0.209834	0.928714	0.774059
RHPN2	1.60363	0.467707	2.07134	0.774201
KSR2	1.71058	0.49793	2.20851	0.774541
MED14OS	1.73813	0.504608	2.24274	0.775003
LOC101906134	1.18287	0.343116	1.52599	0.775152
TRUB2	1.19515	0.34641	1.54156	0.775286
ARHGEF5	0.981686	0.284497	1.26618	0.775312
ZNF565	1.72534	0.5	2.22534	0.775315
MAPK1	0.657733	0.190605	0.848338	0.775319
PCP4	0.885248	0.256495	1.14174	0.775348
EMC9	1.35192	0.39123	1.74315	0.775561
ZNF768	0.917466	0.265043	1.18251	0.775864
FAIM	0.997592	0.287612	1.2852	0.776213
C16H1orf21	0.54659	0.157527	0.704118	0.776277
NTRK2	1.41795	0.408072	1.82602	0.776524
PROB1	1.15803	0.333031	1.49106	0.776648
ARHGEF25	1.42005	0.40745	1.8275	0.777045
LOC112447463	1.16657	0.333333	1.4999	0.777763
LOC112446053	0.739488	0.211015	0.950503	0.777996
TMEM8A	0.830994	0.237035	1.06803	0.778063
TTC14	0.357812	0.101822	0.459634	0.778471
RYR1	1.54154	0.438529	1.98007	0.778528
ADCYAP1	0.917335	0.26082	1.17816	0.77862
CDK5R1	1.30253	0.370294	1.67282	0.778641
DCAF12L2	1.56907	0.446051	2.01512	0.778648
TGFA	0.693061	0.196035	0.889095	0.779512
CAV2	0.557801	0.157763	0.715565	0.779526
CASTOR2	0.575712	0.16234	0.738052	0.780043
LOC100848443	1.32195	0.372678	1.69463	0.780083
RAP2B	0.837428	0.235605	1.07303	0.780431
NRIP1	0.980106	0.275718	1.25582	0.780449
SELENOS	0.783674	0.220158	1.00383	0.780683
SAXO2	0.920867	0.25824	1.17911	0.780987
HSPA1L	0.448033	0.125475	0.573508	0.781215
SCML4	1.04213	0.291661	1.33379	0.781329
CPNE5	1.41315	0.395285	1.80843	0.781421
ERAP2	0.555071	0.154937	0.710008	0.781781
AFF3	0.819317	0.228557	1.04787	0.781885
KCTD20	1.3185	0.367124	1.68562	0.782203
CBX3	0.943584	0.262487	1.20607	0.782362
HRASLS	0.534493	0.148645	0.683139	0.782408
CSNK1G3	0.39725	0.110436	0.507686	0.782472
SPATC1L	1.12588	0.311104	1.43698	0.783501
INAVA	1.68621	0.464811	2.15102	0.783911
BTBD16	1.59344	0.438529	2.03197	0.784185
SLC9A7	0.76172	0.20959	0.97131	0.784219
ARHGDIG	1.53599	0.421271	1.95726	0.784765
LOC100299277	1.13139	0.310248	1.44164	0.784795
SYT5	0.906725	0.248452	1.15518	0.784923
PCDHA13	1.24421	0.339512	1.58372	0.785624
LOC112449259	1.44745	0.3946	1.84205	0.785782
LOC100337293	1.281	0.348814	1.62982	0.785979
LOC100174924	0.91044	0.247864	1.1583	0.786011
B9D1	1.17179	0.318816	1.49061	0.786117
TP53I13	1.61858	0.438529	2.05711	0.786823
MSMP	1.17238	0.316715	1.4891	0.78731
STX2	0.85199	0.230087	1.08208	0.787366
ZFP1	0.529238	0.142866	0.672104	0.787434
KAZN	0.666346	0.179029	0.845375	0.788226
LOC524176	1.73328	0.464811	2.19809	0.788539
PCTP	0.684539	0.183324	0.867863	0.788764
MAF	1.46856	0.393164	1.86173	0.788818
TBX6	1.27943	0.342327	1.62175	0.788916
MOK	0.825893	0.220174	1.04607	0.789522
KDM6A	1.08483	0.288675	1.37351	0.789826
GRIA3	0.86461	0.229784	1.09439	0.790035
LASP1	0.600577	0.159465	0.760042	0.790189
GLRX2	1.13335	0.298807	1.43216	0.791359
ITGA3	1.25588	0.330261	1.58614	0.791783
FGF9	1.3481	0.353553	1.70165	0.79223
OTOGL	0.479162	0.125388	0.604549	0.792593
TMEM104	0.765222	0.2	0.965222	0.792794
LOC104972115	0.951766	0.248452	1.20022	0.792994
LOC112442645	0.422449	0.110049	0.532497	0.793335
ABTB1	1.68622	0.438529	2.12475	0.793609
BMP2K	0.576175	0.149329	0.725504	0.794172
RFESD	1.21752	0.314189	1.53171	0.794877
EID1	0.606093	0.156377	0.76247	0.794908
SPAG4	0.785437	0.202328	0.987765	0.795166
CCDC96	1.34042	0.344676	1.68509	0.795456
PALM	1.58911	0.40745	1.99656	0.795924
PRICKLE3	0.979426	0.250739	1.23016	0.796175
LOC101906218	0.964416	0.246862	1.21128	0.796197
LOC101905818	1.64611	0.421271	2.06739	0.79623
CRK	0.494398	0.126377	0.620775	0.79642
ZNF350	1.63225	0.416913	2.04917	0.796545
PBX2	0.497972	0.12657	0.624542	0.79734
SERHL2	1.14846	0.291661	1.44012	0.797474
MYH7	1.83089	0.464811	2.2957	0.79753
DCDC1	0.679264	0.171856	0.85112	0.798083
TACC1	0.536327	0.135659	0.671986	0.798122
DPYSL3	0.760632	0.192252	0.952884	0.798242
LARS2	1.03205	0.26082	1.29287	0.798263
KAT2B	0.835579	0.211015	1.04659	0.798379
RIBC2	0.896646	0.226124	1.12277	0.798601
FBXO24	0.998238	0.250867	1.2491	0.799163
LOC104976682	1.01103	0.253533	1.26456	0.799509
EBF2	1.06778	0.267695	1.33548	0.799551
FGL1	1.51716	0.3803	1.89746	0.799574
LOC112448040	1.85526	0.464811	2.32007	0.799657
LARGE1	0.782797	0.195627	0.978423	0.800059
FBXL13	0.534672	0.132926	0.667598	0.800889
CBX6	0.828737	0.206006	1.03474	0.800911
LOC112447560	1.34812	0.333333	1.68145	0.801758
PDPN	1.38544	0.342327	1.72777	0.801868
SLC22A11	1.54153	0.3803	1.92183	0.802116
VASH1	1.54153	0.3803	1.92183	0.802116
PTPN4	0.400091	0.0985532	0.498645	0.802358
LOC104969716	0.984753	0.242031	1.22678	0.802711
PRR7	1.06572	0.261456	1.32717	0.802997
MAP3K5	1.72281	0.421271	2.14408	0.80352
RRNAD1	1.77141	0.433013	2.20442	0.803571
CLYBL	0.619724	0.151351	0.771075	0.803714
PML	1.15413	0.280847	1.43497	0.804284
ING1	0.816495	0.197119	1.01361	0.805528
LOC618541	0.767094	0.184418	0.951512	0.806184
RELN	0.882565	0.212167	1.09473	0.806193
LOC100336368	0.5534	0.132964	0.686363	0.806278
PPIL1	0.42948	0.103039	0.532519	0.806506
RNF24	0.41108	0.0985738	0.509654	0.806587
ERICH2	0.882413	0.211144	1.09356	0.80692
SH2D7	1.27971	0.306186	1.5859	0.806932
LOC104974569	1.56591	0.372678	1.93859	0.807758
LOC100847941	1.30696	0.310438	1.6174	0.808063
MTFP1	0.568199	0.134185	0.702383	0.808958
LANCL3	1.13352	0.267261	1.40078	0.809206
SMARCD3	1.66182	0.39123	2.05305	0.80944
CANT1	0.506581	0.119181	0.625762	0.809543
RIIAD1	0.548969	0.128921	0.67789	0.809821
NAA80	0.795988	0.186742	0.98273	0.809976
LOC531747	0.601858	0.141173	0.743031	0.810004
TRPV5	1.32727	0.310438	1.63771	0.810444
LOC104975626	1.46379	0.342327	1.80612	0.810463
KLHL21	0.666069	0.155632	0.821701	0.810597
IL21	1.06382	0.248452	1.31227	0.81067
SLK	0.681358	0.158866	0.840225	0.810924
LOC104972407	1.51716	0.353553	1.87071	0.811006
FOXK1	1.51716	0.353553	1.87071	0.811006
DGCR6L	0.595437	0.138409	0.733846	0.811392
IL17D	0.64145	0.148968	0.790418	0.811532
CENPB	1.76565	0.408248	2.1739	0.812205
LOC112447755	1.07622	0.248452	1.32467	0.812442
GRM4	1.0378	0.239579	1.27738	0.812446
HIST1H2AK	1.13579	0.261456	1.39725	0.812878
SLC24A3	1.49734	0.344676	1.84202	0.812881
LOC112442555	1.49277	0.342327	1.8351	0.813456
LOC112446406	0.696782	0.159719	0.856501	0.813521
SLC7A1	0.705892	0.160896	0.866788	0.814377
LOC100847825	1.02025	0.232336	1.25258	0.814514
WWC1	0.844051	0.191741	1.03579	0.814885
ZNF597	1.31979	0.298807	1.61859	0.815391
F8	1.35372	0.306086	1.65981	0.81559
LOC112442703	1.56424	0.353553	1.91779	0.815645
LOC112448007	1.4915	0.335346	1.82685	0.816435
LRRIQ1	1.41245	0.316228	1.72867	0.817069
DGKE	0.648024	0.143489	0.791513	0.818716
PHLPP1	0.545672	0.120699	0.666371	0.818871
HAP1	0.905712	0.199549	1.10526	0.819455
LOC112447662	1.85528	0.408248	2.26353	0.819641
ATG4C	0.486253	0.106825	0.593078	0.81988
ETHE1	0.949519	0.208248	1.15777	0.820129
C14H8orf88	0.410587	0.0892412	0.499828	0.821456
TNFSF10	1.5447	0.333333	1.87803	0.82251
B3GAT3	1.20135	0.259131	1.46048	0.822572
PECR	0.826085	0.17795	1.00403	0.822765
ZSWIM4	1.56474	0.335346	1.90008	0.82351
APRT	1.83088	0.39123	2.22211	0.823937
DLGAP2	1.83088	0.39123	2.22211	0.823937
HRCT1	1.83088	0.39123	2.22211	0.823937
LOC101903951	1.83088	0.39123	2.22211	0.823937
C10H14orf93	1.83088	0.39123	2.22211	0.823937
BSN	1.22406	0.26082	1.48488	0.824349
LOC107132207	1.66184	0.353553	2.0154	0.824574
CDK5R2	0.566986	0.12	0.686986	0.825324
C7H5orf63	0.676624	0.143073	0.819697	0.825456
MAK	0.894035	0.188584	1.08262	0.825808
MAPK3	1.15112	0.241642	1.39276	0.826502
LOC104976269	0.952929	0.2	1.15293	0.826529
PSMG4	0.664393	0.139387	0.803779	0.826586
ZNF579	1.42439	0.298807	1.7232	0.826597
TMOD4	1.68621	0.353553	2.03977	0.82667
DUSP22	0.518505	0.108253	0.626758	0.827281
LOC112441530	1.61615	0.335346	1.9515	0.82816
CNTD1	0.37993	0.0786704	0.4586	0.828455
FAM181B	1.66183	0.342327	2.00416	0.829192
CCNB1IP1	0.414308	0.084961	0.499269	0.829829
MROH8	1.85527	0.3803	2.23557	0.829887
CIDEC	1.28395	0.263067	1.54701	0.829952
SHMT1	1.41165	0.288675	1.70032	0.830223
ROM1	1.68623	0.34401	2.03024	0.830556
LY6G5B	1.83087	0.372678	2.20355	0.830874
FKBPL	1.29519	0.263523	1.55872	0.830936
AARS2	1.73814	0.353152	2.09129	0.831132
SLC25A46	1.21572	0.244949	1.46067	0.832304
TSPAN9	1.24275	0.248452	1.4912	0.833388
ZNF793	1.53513	0.306186	1.84131	0.833713
LOC107132308	0.884254	0.175682	1.05994	0.834252
HOXA1	1.13858	0.2248	1.36338	0.835116
KCNQ1	1.03262	0.203279	1.2359	0.835521
MINDY2	1.07056	0.210663	1.28122	0.835577
ZBTB7A	1.99994	0.39123	2.39117	0.836385
SLC7A14	1.99994	0.39123	2.39117	0.836385
ARL16	0.995123	0.194219	1.18934	0.8367
NOS3	0.913506	0.178013	1.09152	0.836913
ABHD14B	1.03638	0.200736	1.23711	0.837738
LOC112448013	1.29974	0.248452	1.54819	0.839521
LOC101902784	1.85527	0.353553	2.20882	0.839936
CNPY3	0.79103	0.150023	0.941053	0.84058
AKAIN1	0.420879	0.0797579	0.500637	0.840687
NSMCE4A	0.505881	0.0953483	0.601229	0.841411
TTPA	1.83091	0.34401	2.17492	0.841828
ALKBH4	1.32373	0.248452	1.57218	0.84197
TWIST1	1.3952	0.261456	1.65665	0.842178
DDAH2	1.99993	0.372678	2.37261	0.842925
EML3	1.99993	0.372678	2.37261	0.842925
LOC112442576	1.99993	0.372678	2.37261	0.842925
GABRR2	1.99993	0.372678	2.37261	0.842925
SUGCT	1.61859	0.298807	1.91739	0.84416
SLC29A2	1.61859	0.298807	1.91739	0.84416
LOC112445958	1.01346	0.187083	1.20055	0.844169
HORMAD1	0.805176	0.148582	0.953757	0.844215
LOC101905075	0.985376	0.181303	1.16668	0.844599
ZDHHC1	1.88281	0.34401	2.22682	0.845515
ASPHD2	0.790101	0.144174	0.934275	0.845684
LOC101908238	1.37179	0.25	1.62179	0.845849
POLRMT	0.852016	0.153846	1.00586	0.847051
RPS29	0.745015	0.132926	0.87794	0.848593
PMAIP1	0.784674	0.139271	0.923945	0.849265
TIAL1	0.671597	0.118467	0.790064	0.850054
AES	0.679436	0.117851	0.797287	0.852185
GALE	0.485045	0.0833232	0.568368	0.853399
ARHGEF10L	1.45014	0.248452	1.6986	0.853731
LOC112448775	0.607784	0.104096	0.71188	0.853773
IGDCC3	1.99994	0.342327	2.34227	0.853848
LOC786914	0.636408	0.107397	0.743804	0.855612
LOC112443485	0.988354	0.161095	1.14945	0.85985
SLCO1C1	1.24949	0.203279	1.45277	0.860075
NEURL1	1.41956	0.228218	1.64778	0.8615
LOC101908174	1.56903	0.25	1.81903	0.862564
FAM46A	1.22605	0.191741	1.4178	0.864761
LOC101902425	1.03072	0.159719	1.19044	0.865832
HES1	0.616672	0.0947729	0.711445	0.866788
ADAMTS19	1.32374	0.203279	1.52702	0.866878
LOC787714	1.39686	0.210663	1.60752	0.868952
PCBD2	1.34811	0.203279	1.55139	0.86897
LOC112443156	1.66184	0.248452	1.91029	0.86994
CELF5	1.66184	0.248452	1.91029	0.86994
TBX20	1.1713	0.174964	1.34626	0.870038
LOC104974486	1.11911	0.166667	1.28577	0.870376
NAV1	0.963715	0.142857	1.10657	0.870901
PDGFD	0.792923	0.113177	0.906101	0.875094
LOC112444748	0.946758	0.133591	1.08035	0.876345
FN3K	0.826464	0.116448	0.942912	0.876502
LOC507443	1.66185	0.228218	1.89007	0.879254
GMPPB	0.916852	0.125	1.04185	0.880021
SMIM1	1.56592	0.210663	1.77658	0.881422
GPR37	1.01314	0.135735	1.14887	0.881853
TMTC1	0.64928	0.0847966	0.734076	0.884485
LOC112448536	0.681344	0.0882958	0.76964	0.885276
ANKRD1	1.85529	0.235702	2.09099	0.887277
LOC112446452	1.37404	0.174304	1.54835	0.887426
SPEG	1.68622	0.203279	1.8895	0.892417
DNAJC21	0.582341	0.0698326	0.652173	0.892923
EPHB2	1.20481	0.139754	1.34456	0.89606
LOC101905041	0.92592	0.106479	1.0324	0.896862
EXOC1	0.387515	0.0427022	0.430217	0.900743
LOC101906160	0.42322	0.0459311	0.469151	0.902097
PDE4D	0.631816	0.06415	0.695966	0.907826
MPI	0.750164	0.0653641	0.815528	0.919851
LOC107133269	1.99992	0	1.99992	1
